# Supplementary material for: Competition-based, quantitative chemical proteomics in breast cancer cells identifies new target profiles for sulforaphane
Source: Chem Commun (Camb). 2017 Apr 25;53(37):5182–5. doi: 10.1039/c6cc08797c (PMC6034444; doi:10.1039/c6cc08797c)
Supplement: Supplementary file 1 [file CC-053-C6CC08797C-s001.pdf]

Supplementary Information for

## **Competition-based, quantitative chemical proteomics in breast cancer cells identifies new target profiles for sulforaphane**

James A. Clulow,<sup>a,‡</sup> Elisabeth M. Storck,<sup>a,‡</sup> Thomas Lanyon-Hogg,<sup>a,‡</sup> Karunakaran A. Kalesh,<sup>a</sup> Lyn Jones<sup>b</sup> and Edward W. Tate<sup>a,\*</sup>

<sup>a</sup> Department of Chemistry, Imperial College London, London, UK, SW7 2AZ

<sup>b</sup> Worldwide Medicinal Chemistry, Pfizer, 200 Cambridge Park Drive, MA 02140, USA

<sup>‡</sup> Authors share equal contribution

\* corresponding author, email: [e.tate@imperial.ac.uk](mailto:e.tate@imperial.ac.uk)

## Table of Contents

|       |                                                                                                                                      |    |
|-------|--------------------------------------------------------------------------------------------------------------------------------------|----|
| 1     | Supporting Figures.....                                                                                                              | 3  |
| 2     | Supporting Tables.....                                                                                                               | 17 |
| 2.1   | Supporting Table S1. Incorporation validation for the R10K8 label in the 'spike-in' SILAC proteome of the MCF7 cell line .....       | 17 |
| 2.2   | Supporting Table S2. Incorporation validation for the R10K8 label in the 'spike-in' SILAC proteome of the MDA-MB-231 cell line ..... | 17 |
| 2.3   | Supporting Table S3. High- and medium- confidence targets of sulforaphane in the MCF7 cell line.....                                 | 17 |
| 2.4   | Supporting Table S4. High- and medium- confidence targets of sulforaphane in the MDA-MB-231 cell line .....                          | 24 |
| 3     | Chemical synthesis methods .....                                                                                                     | 36 |
| 3.1   | General Information .....                                                                                                            | 36 |
| 3.2   | Synthesis of Probe 1 .....                                                                                                           | 36 |
| 3.2.1 | 4-Hex-5-ynyloxy-benzaldehyde .....                                                                                                   | 37 |
| 3.2.2 | 2-(4-Chloro-butyl)-2-methyl-[1,3]dioxolane .....                                                                                     | 37 |
| 3.2.3 | 2-(4-Phthalimido-butyl)-2-methyl-[1,3]dioxolane .....                                                                                | 37 |
| 3.2.4 | 2-(4-Amino-butyl)-2-methyl-[1,3]dioxolane .....                                                                                      | 38 |
| 3.2.5 | (4-hex-5-ynyloxy-benzyl)-[4-(2-methyl-[1,3]dioxolan-2-yl)-butyl]-amine.....                                                          | 38 |
| 3.2.6 | S-Ethyl (4-hex-5-ynyloxy-benzyl)-[4-(2-methyl-[1,3]dioxolan-2-yl)-butyl]-thiocarbamate .....                                         | 38 |
| 3.2.7 | S-Ethyl (4-hex-5-ynyloxy-benzyl)-(5-oxo-hexyl)-thiocarbamate .....                                                                   | 39 |
| 3.2.8 | S-Ethyl(4-hex-5-ynyloxy-benzyl)-(5-oxo-hexyl)-thiocarbamatesulfoxide (1) .....                                                       | 39 |
| 3.3   | Synthesis of Probe 2 .....                                                                                                           | 40 |
| 3.3.1 | S-Ethyl (prop-2-ynyl)-[4-(2-methyl-[1,3]dioxolan-2-yl)-butyl]-thiocarbamate .....                                                    | 40 |
| 3.3.2 | S-Ethyl (prop-2-ynyl)-(5-oxo-hexyl)-thiocarbamate.....                                                                               | 41 |
| 3.3.3 | S-Ethyl (prop-2-ynyl)-(5-oxo-hexyl)-thiocarbamate sulfoxide (2) .....                                                                | 41 |
| 3.4   | <sup>1</sup> H NMR, <sup>13</sup> C NMR, HRMS and LC-MS data .....                                                                   | 42 |
| 4     | Biological and biochemical methods .....                                                                                             | 46 |
| 4.1   | General methods .....                                                                                                                | 46 |
| 4.2   | Cell culture.....                                                                                                                    | 46 |
| 4.3   | In-cell competition-based assays for in-gel fluorescence and Western Blot analyses .....                                             | 46 |
| 4.3.1 | Compound treatment of cells and cell lysis .....                                                                                     | 46 |
| 4.3.2 | Copper catalysed azide-alkyne cycloaddition (CuAAC).....                                                                             | 47 |
| 4.3.3 | Gel electrophoresis and in-gel fluorescence.....                                                                                     | 47 |

|       |                                                                                                     |    |
|-------|-----------------------------------------------------------------------------------------------------|----|
| 4.3.4 | Affinity enrichment and Western Blot analysis .....                                                 | 47 |
| 4.4   | In-cell quantitative, competition-based assays for target identification by mass spectrometry ..... | 48 |
| 4.4.1 | Compound treatment of cells and cell lysis.....                                                     | 48 |
| 4.4.2 | Preparation of 'spike-in' SILAC cell lysates as quantification standards .....                      | 49 |
| 4.4.3 | CuAAC, affinity enrichment and on-bead reduction, alkylation and trypsin digest.....                | 49 |
| 4.4.4 | LC-MS/MS .....                                                                                      | 50 |
| 4.4.5 | LC-MS/MS data analysis.....                                                                         | 50 |
| 4.4.6 | Abundance and bioinformatic analysis.....                                                           | 51 |
| 5     | References .....                                                                                    | 52 |

## 1 Supporting Figures

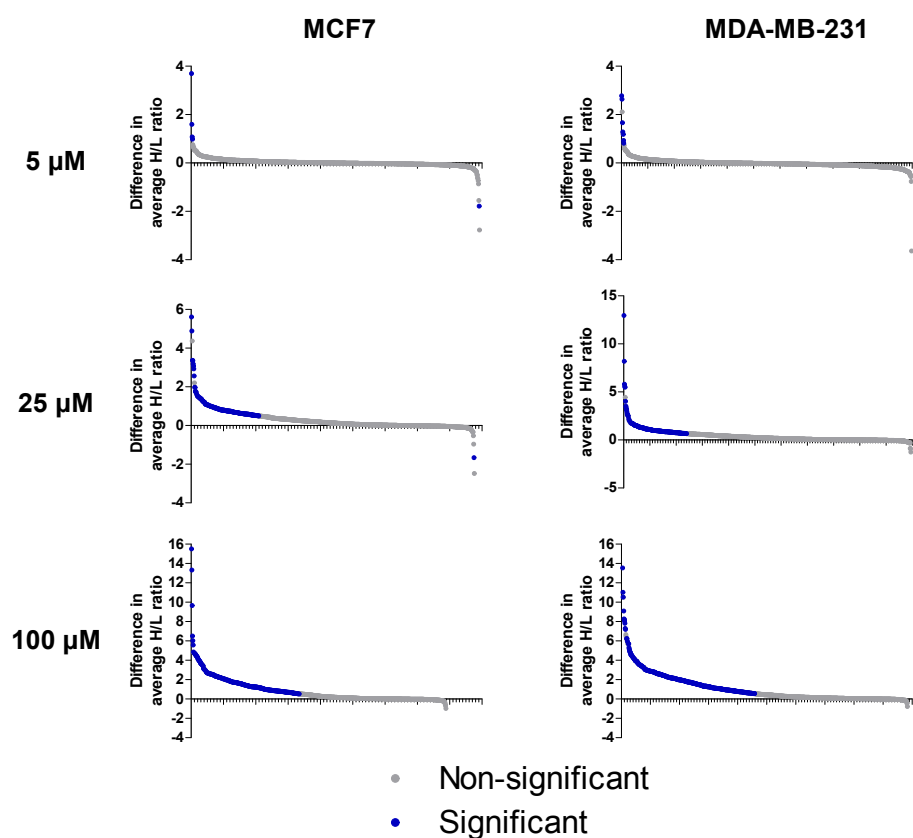

Supporting Figure S1. Target profiles of **2** in competition with three concentrations of sulforaphane in MCF7 and MDA-MB-231 cells. Potential targets were identified as giving a statistically significant change (t-test,  $S_0 = 1$ , FDR = 0.01, shown in blue) in H/L ratio compared to samples treated with **2** alone.

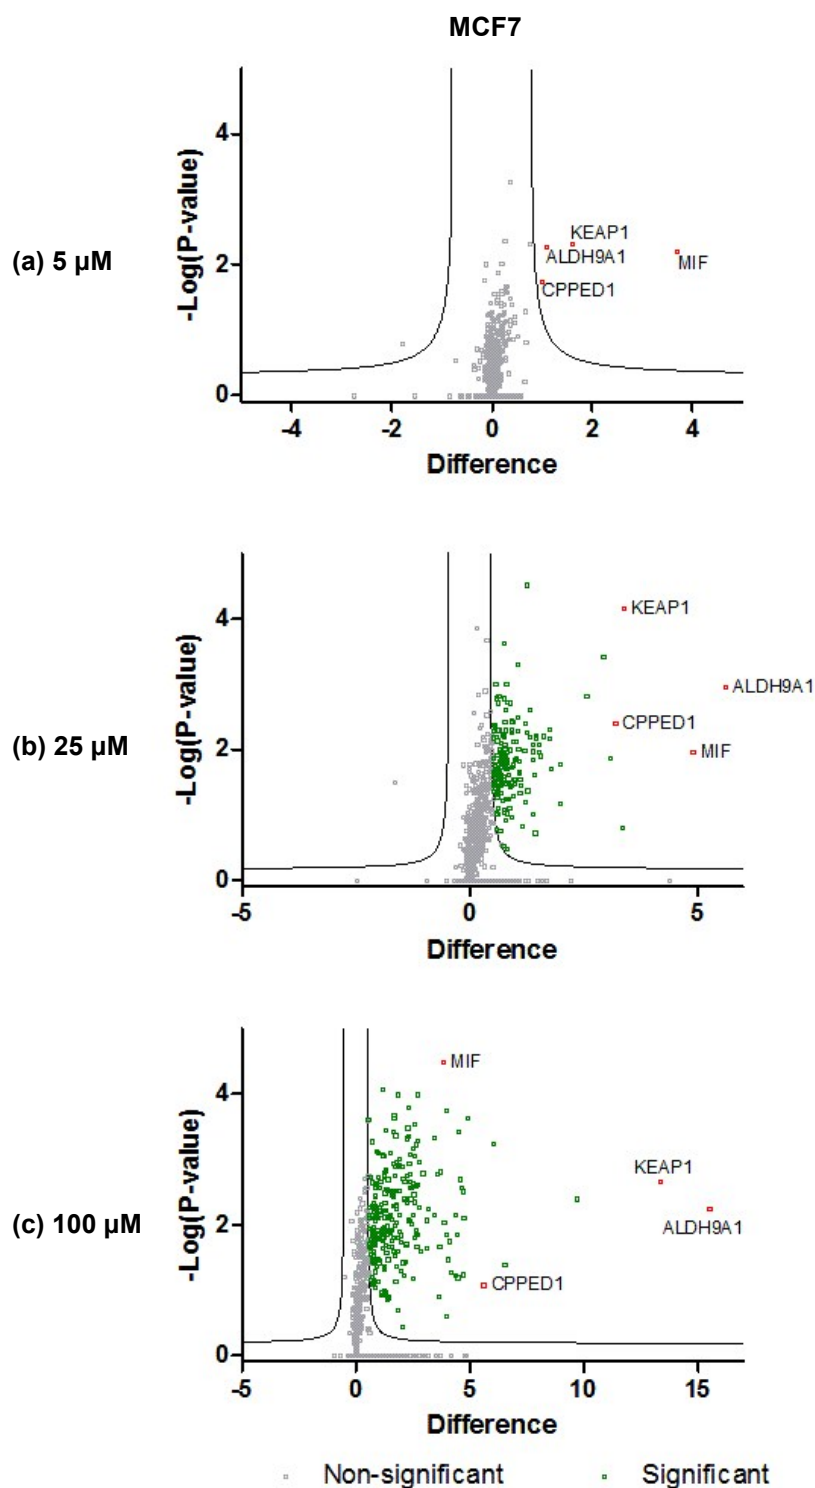

Supporting Figure S2. Volcano plots for **2** in competition with three concentrations of sulforaphane in MCF7. Medium-confidence targets were identified as giving a statistically significant change (t-test,  $S_0 = 1$ , FDR = 0.01, shown in green) in H/L ratio compared to samples treated with **2** alone. The four high affinity and conserved targets MIF, KEAP1, ALDH9A1 and CPPED1 are highlighted to show distribution at each concentration.

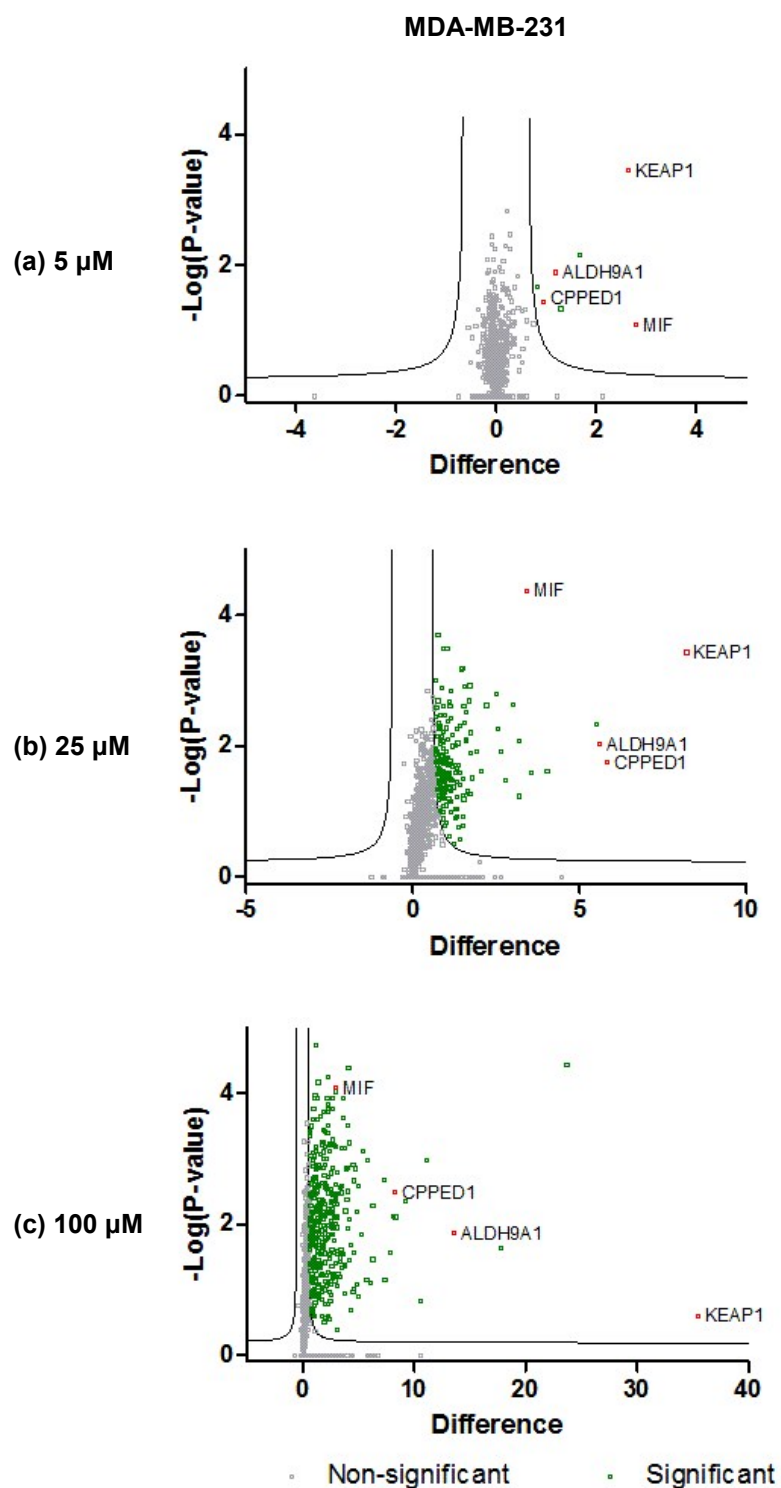

Supporting Figure S3. Volcano plots for **2** in competition with three concentrations of sulforaphane in MDA-MB-231 cells. Medium-confidence targets were identified as giving a statistically significant change (t-test,  $S_0 = 1$ , FDR = 0.01, shown in green) in H/L ratio compared to samples treated with **2** alone. The four high affinity and conserved targets MIF, KEAP1, ALDH9A1 and CPPED1 are highlighted to show distribution at each concentration.

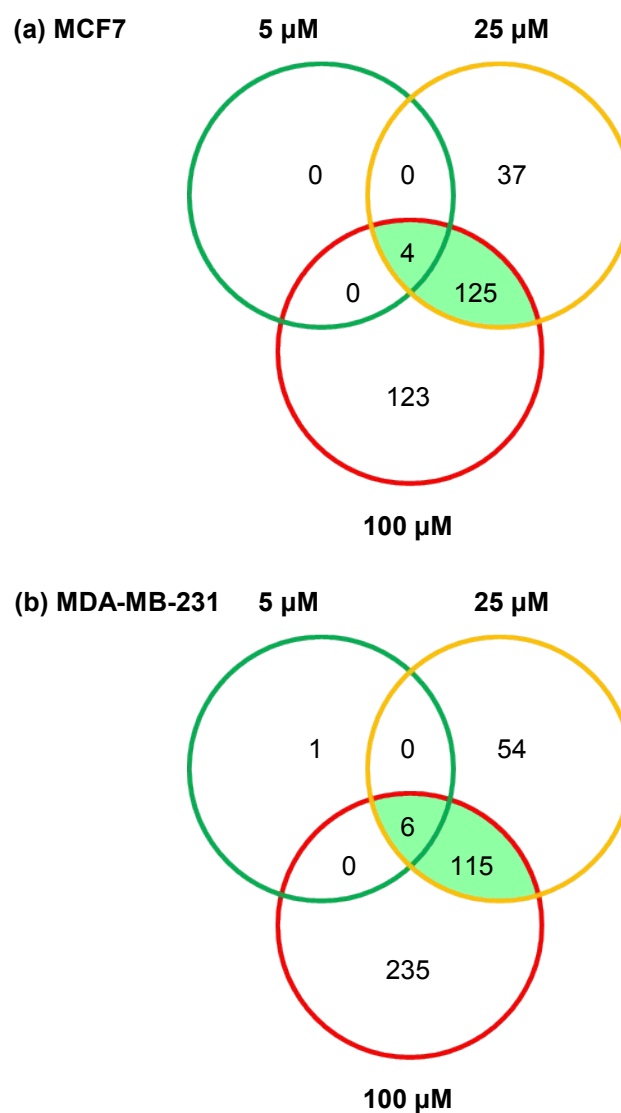

Supporting Figure S4. Medium- and high-confidence targets of sulforaphane in (a) MCF7 and (b) MDA-MB-231 cells. Medium-confidence targets were identified as giving a statistically significant (t-test,  $S_0 = 1$ , FDR = 0.01) change in H/L ratio at one sulforaphane concentration. Medium-confidence targets identified at 5, 25, and 100  $\mu$ M, or at 25 and 100  $\mu$ M, were defined as high-confidence targets (highlighted green).

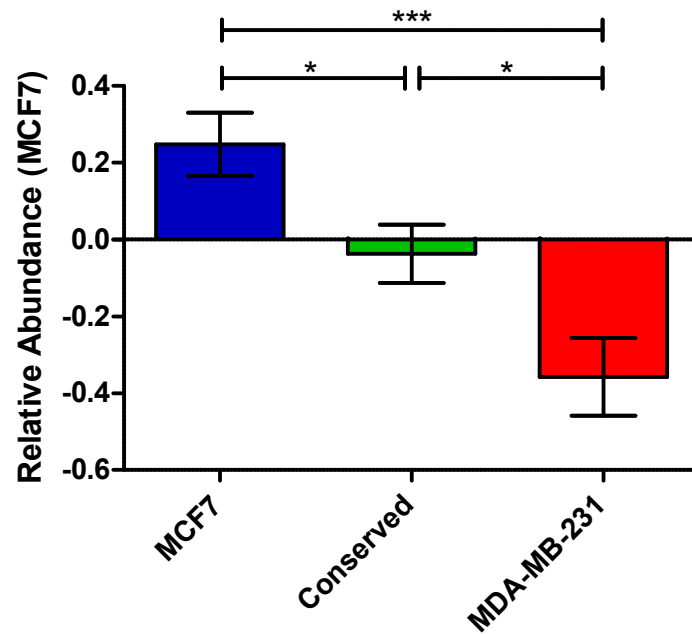

Supporting Figure S5. Comparisons of difference in relative abundance levels for conserved and cell line-specific high-confidence targets of sulforaphane. Relative abundance was calculated as described in materials and methods using intensity based absolute quantification (iBAQ) values for each cell line from proteomic analysis of the NCI-60 cell line panel.<sup>1</sup> A relative abundance > 0 indicates a protein is present at higher levels in MCF7 cells than in MDA-MB-231 cells; conversely a relative abundance < 0 indicates a protein is present at higher levels in MDA-MB-231 cells than in MCF7 cells. Average relative abundance of targets indicates that cell line-specific targets show higher abundance within that cell line (\* =  $p < 0.05$ , \*\*\* =  $p < 0.0001$ ).

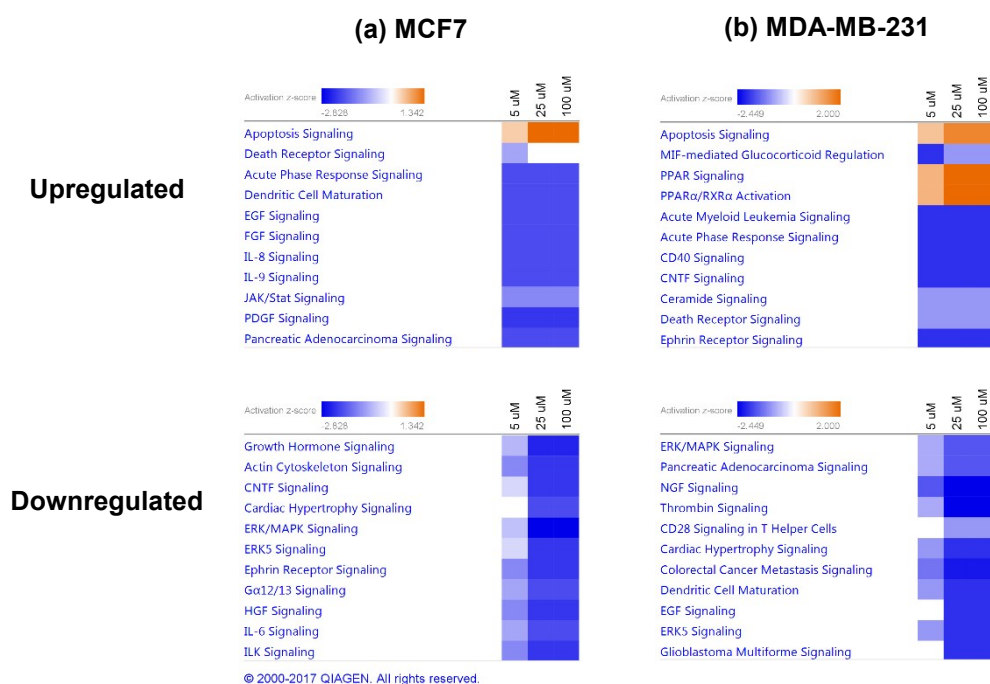

Supporting Figure S6. IPA heatmap analysis of up- and downregulated canonical pathways in (a) MCF7 and (b) MDA-MB-231 cell lines. Heatmaps are ordered by increasing or decreasing z-score trend, and coloured with orange indicating upregulation and blue indicating downregulation.

**(a) Sulforaphane targets in apoptosis signalling in MCF7:**

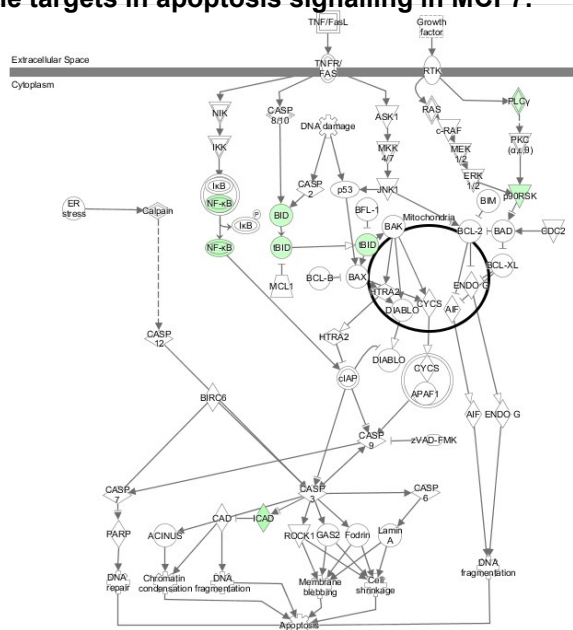

**(b) Sulforaphane targets in apoptosis signalling in MDA-MB-231:**

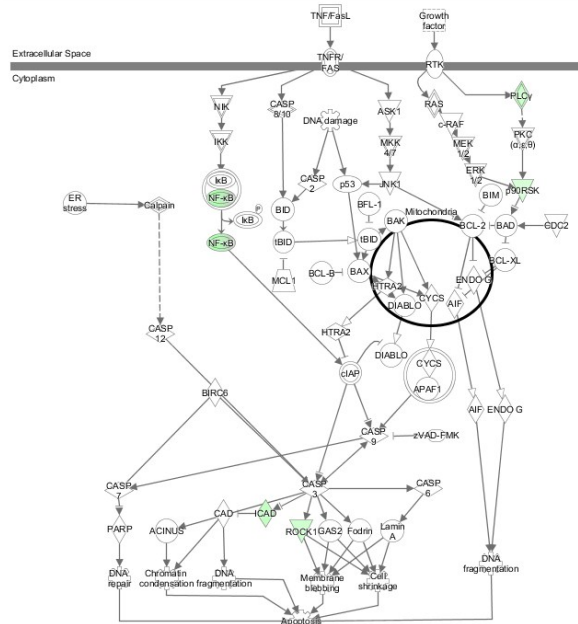

© 2000-2017 QIAGEN. All rights reserved.

Supporting Figure S7. Targets in upregulated apoptosis signalling in (a) MCF7 and (b) MDA-MB-231 cell lines. Protein targets of sulforaphane are highlighted in green with colour density representing  $-\log_2(QS)$  at 25  $\mu M$ , with denser colour indicating lower  $-\log_2(QS)$ . NF- $\kappa B$  subunits are common in both cell lines, along with PLCG1, p90RSK (RPS6KA1), and ICAD (DFFA).

**(a) Sulforaphane targets in growth hormone signalling in MCF7:**

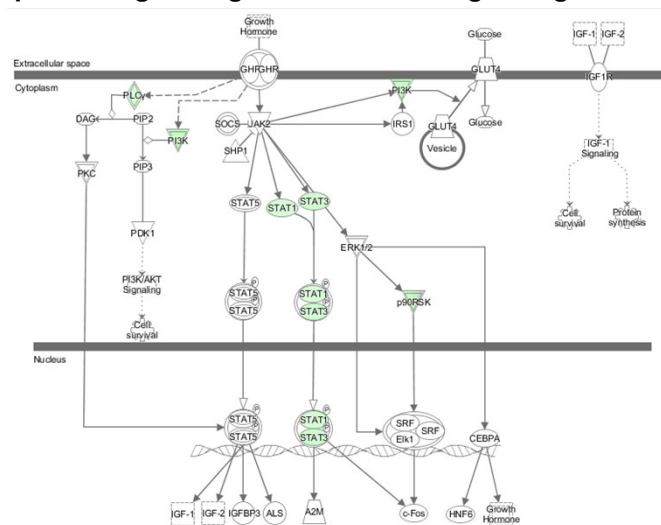

**(b) Sulforaphane targets in ERK/MAPK signalling in MDA-MB-231:**

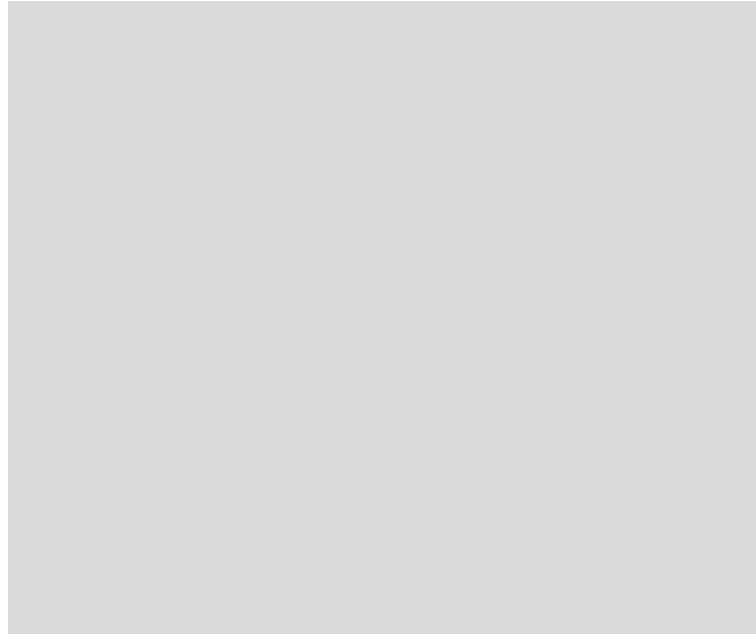

Supporting Figure S8. Major downregulated signalling pathways in (a) MCF7 and (b) MDA-MB-231 cell lines. Protein targets of sulforaphane are highlighted in green with colour density representing  $-\log_2(QS)$  at 25  $\mu M$ , with denser colour indicating lower  $-\log_2(QS)$ . STAT transcription factors are common to both predominantly downregulated pathways.

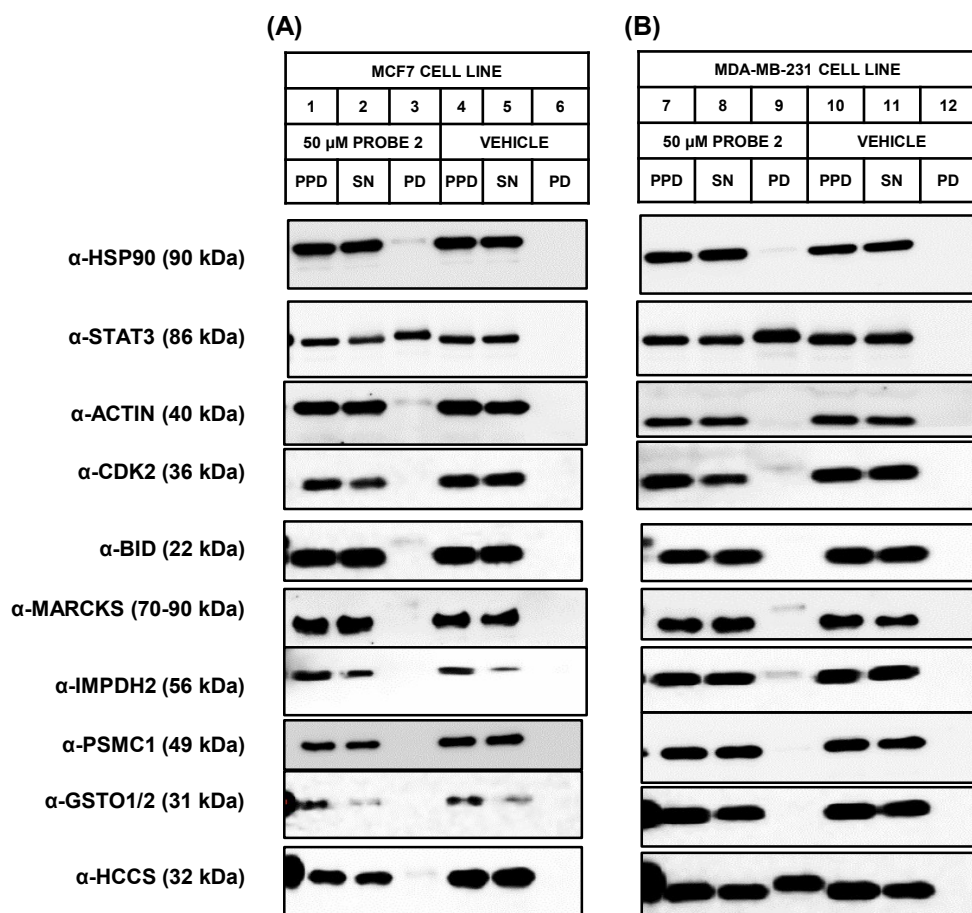

Supporting Figure S9. Western Blot analyses of potential targets (HSP90, STAT3, ACTIN, CDK2, BID, MARCKS, IMPDH2, PSMC1, GSTO1/2 and HCCS) of **2** (50  $\mu$ M) in MCF7 (a) and MDA-MB-231 (b) cell lines compared to vehicle (DMSO) treatment. PPD = pre-pull down lysate, SN = supernatant lysate after pulldown and PD = pulldown.

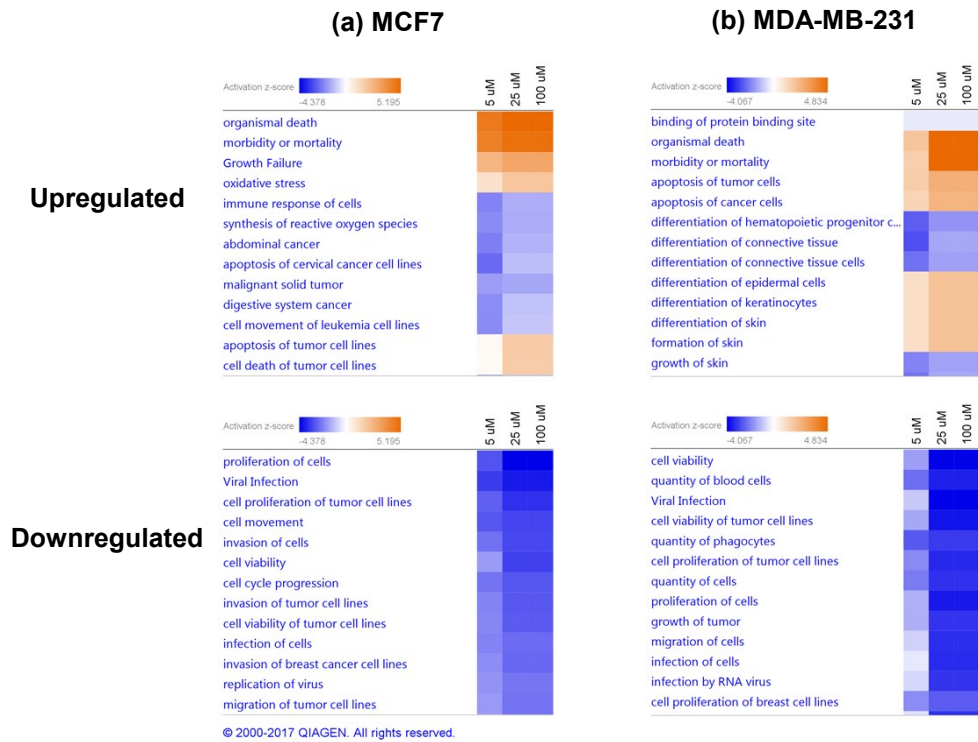

Supporting Figure S10. IPA heatmap analysis of up- and downregulated disease and biofunctions in (a) MCF7 and (b) MDA-MB-231 cell lines. Heatmaps are ordered by increasing or decreasing z-score trend and z-score, and coloured with orange indicating upregulation and blue indicating downregulation.

## MCF7

### (a) Organismal death

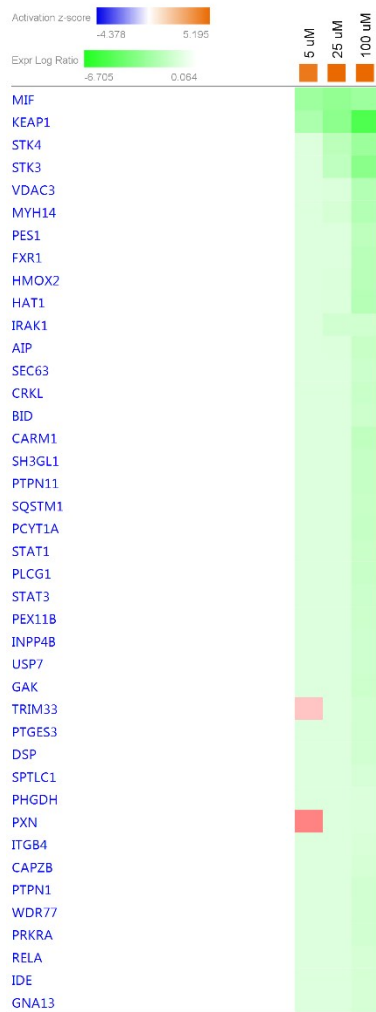

### (b) Proliferation of cells

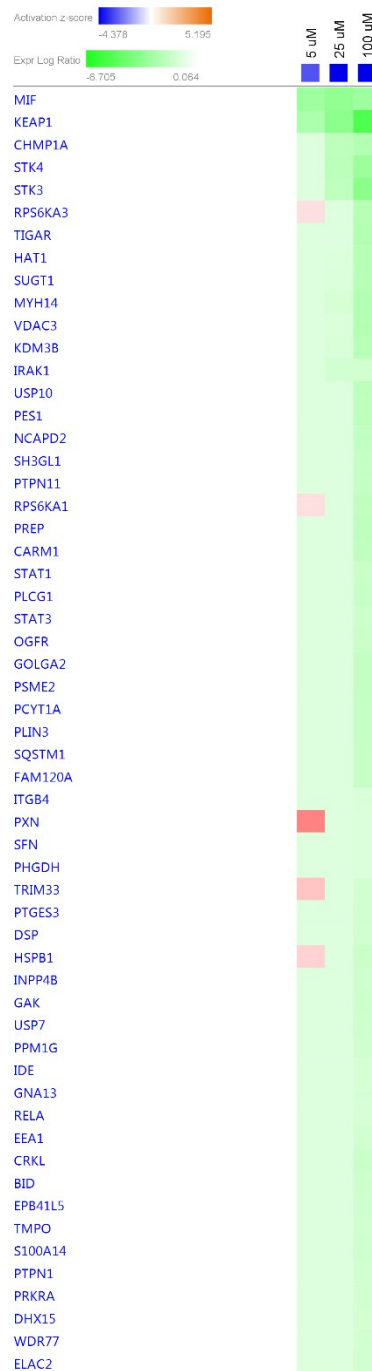

© 2000-2017 QIAGEN. All rights reserved.

Supporting Figure S11. Heatmap of high confidence sulforaphane targets involved in disease and biofunctions in MCF7 cells. (a) Targets involved in upregulation of organismal death, and (b) targets involved in downregulation of proliferation of cells. Heatmap density represents  $-\log_2(QS)$  at each concentration.

## MDA-MB-231

### (a) Organismal death

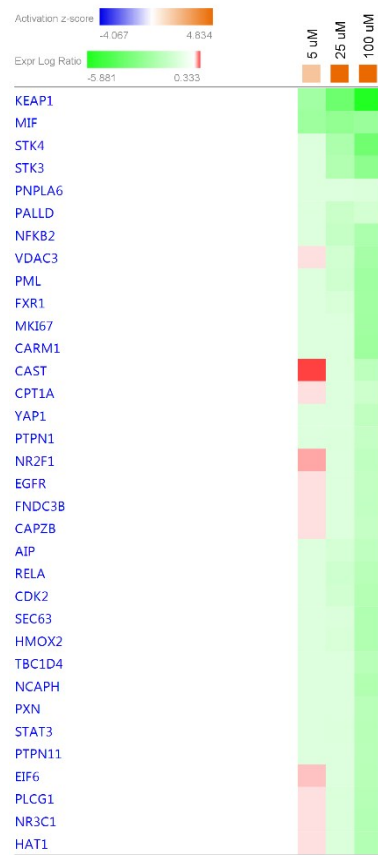

© 2000-2017 QIAGEN. All rights reserved.

### (b) Cell viability

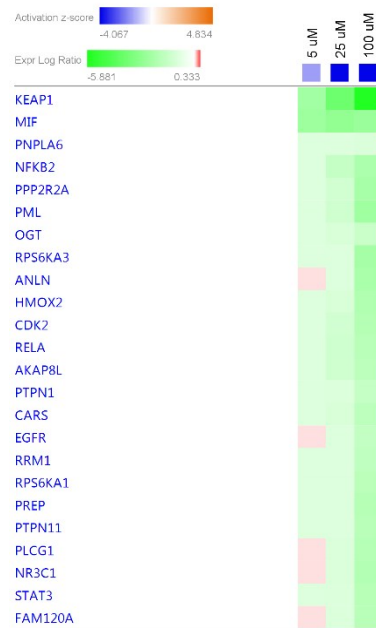

Supporting Figure S12. Heatmap of high confidence sulforaphane targets involved in disease and biofunctions in MDA-MB-231 cells. (a) Targets involved in upregulation of organismal death, and (b) targets involved in downregulation of cell viability. Heatmap density represents  $-\log_2(QS)$  at each concentration. Comparison with MCF7 cells (Figure S11) indicates several targets present in multiple functions, including KEAP1, MIF, STAT3, STK3, STK4, and RELA.

## Conserved Targets

### (a) Canonical Pathways

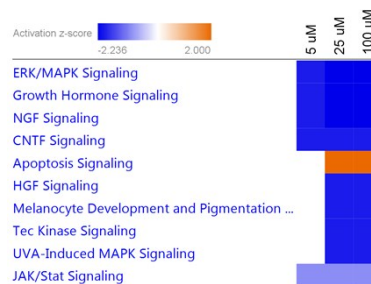

### (b) Diseases and Biofunctions

#### Upregulated

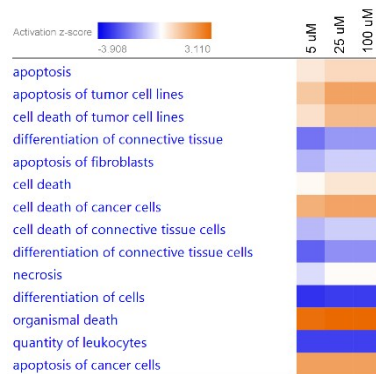

© 2000-2017 QIAGEN. All rights reserved.

#### Downregulated

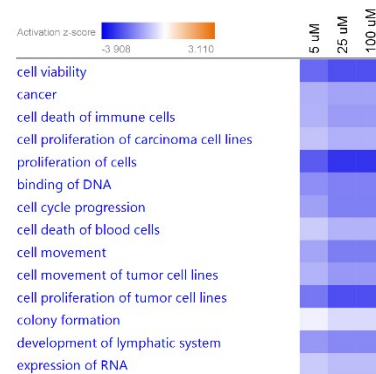

Supporting Figure S13. Analysis of conserved targets of sulforaphane in MCF7 and MD-MBA-231 cells. (a) All canonical pathways modulated by sulforaphane. (b) Upregulated and down regulated diseases and biofunctions. Heatmap is ordered by increasing or decreasing z-score trend, and coloured with orange indicating upregulation and blue indicating downregulation.

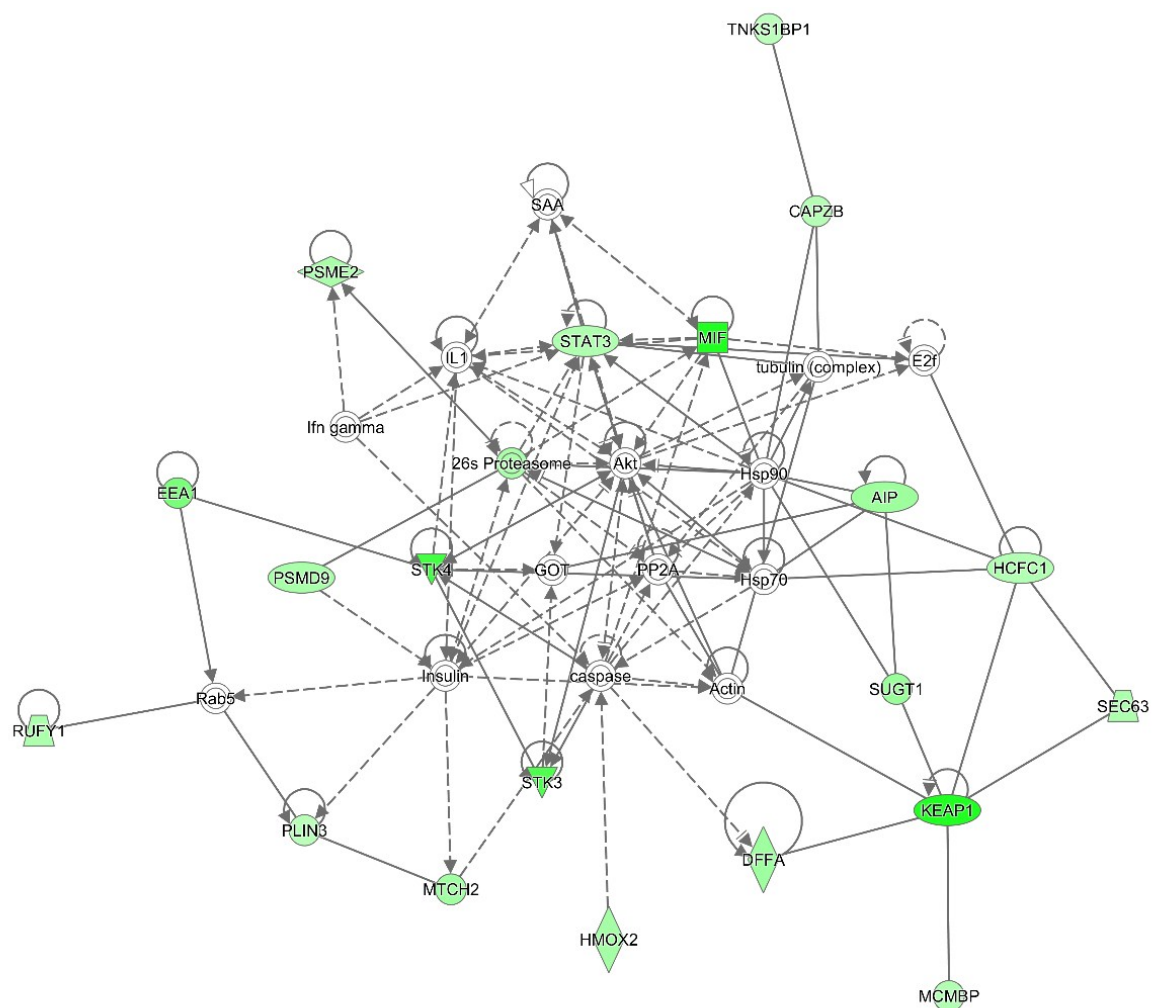

© 2000-2017 QIAGEN. All rights reserved.

Supporting Figure S14. Network analysis of conserved targets of sulforaphane in MCF7 and MD-MBA-231 cell lines at 25  $\mu$ M, indicating a high-degree of connectivity around Akt kinases and caspases.

## 2 Supporting Tables

### 2.1 Supporting Table S1. Incorporation validation for the R10K8 label in the 'spike-in' SILAC proteome of the MCF7 cell line

See additional Excel file.

### 2.2 Supporting Table S2. Incorporation validation for the R10K8 label in the 'spike-in' SILAC proteome of the MDA-MB-231 cell line

See additional Excel file.

### 2.3 Supporting Table S3. High- and medium- confidence targets of sulforaphane in the MCF7 cell line

|    | Gene names                       | Protein names                                                                                                                                                   | Confidence | Conserved | Log <sub>2</sub> QS |      |      |
|----|----------------------------------|-----------------------------------------------------------------------------------------------------------------------------------------------------------------|------------|-----------|---------------------|------|------|
|    |                                  |                                                                                                                                                                 |            |           | Sulforaphane (μM)   |      |      |
|    |                                  |                                                                                                                                                                 |            |           | 5                   | 25   | 100  |
| 1  | <b>ABHD12</b>                    | Monoacylglycerol lipase ABHD12                                                                                                                                  | High       | N         | 0.23                | 0.83 | 1.40 |
| 2  | <b>ACAD9</b>                     | Acyl-CoA dehydrogenase family member 9, mitochondrial                                                                                                           | High       | Y         | 0.31                | 0.85 | 1.31 |
| 3  | <b>AIP</b>                       | AH receptor-interacting protein;Peptidyl-prolyl cis-trans isomerase                                                                                             | High       | Y         | 0.29                | 1.04 | 1.68 |
| 4  | <b>AKAP1</b>                     | A-kinase anchor protein 1, mitochondrial                                                                                                                        | High       | Y         | 0.08                | 0.74 | 1.75 |
| 5  | <b>ALDH6A1</b>                   | Methylmalonate-semialdehyde dehydrogenase [acylating], mitochondrial                                                                                            | High       | N         | 0.16                | 1.07 | 1.75 |
| 6  | <b>ALDH9A1</b>                   | 4-trimethylaminobutyraldehyde dehydrogenase                                                                                                                     | High       | Y         | 0.63                | 1.95 | 3.15 |
| 7  | <b>ASMTL</b>                     | N-acetylserotonin O-methyltransferase-like protein                                                                                                              | High       | N         | 0.13                | 0.80 | 1.61 |
| 8  | <b>ATG4B</b>                     | Cysteine protease ATG4B                                                                                                                                         | High       | N         | 0.00                | 0.50 | 1.29 |
| 9  | <b>ATP13A1</b>                   | Probable cation-transporting ATPase 13A1                                                                                                                        | High       | N         | 0.04                | 0.82 | 6.70 |
| 10 | <b>ATP6V1A</b>                   | V-type proton ATPase catalytic subunit A                                                                                                                        | High       | Y         | 0.15                | 1.00 | 1.95 |
| 11 | <b>BAG5</b>                      | BAG family molecular chaperone regulator 5                                                                                                                      | High       | N         | 0.13                | 0.91 | 1.89 |
| 12 | <b>BID</b>                       | BH3-interacting domain death agonist;BH3-interacting domain death agonist p15;BH3-interacting domain death agonist p13;BH3-interacting domain death agonist p11 | High       | N         | 0.28                | 0.81 | 1.52 |
| 13 | <b>BOLA2;BOLA2B;LOC101060252</b> | BolA-like protein 2                                                                                                                                             | High       | N         | 0.22                | 1.10 | 2.27 |
| 14 | <b>BTD</b>                       | Biotinidase                                                                                                                                                     | High       | Y         | 0.40                | 2.00 | 3.51 |
| 15 | <b>CAD</b>                       | CAD protein;Glutamine-dependent carbamoyl-phosphate synthase;Aspartate carbamoyltransferase;Dihydroorotase                                                      | High       | Y         | 0.18                | 0.80 | 1.53 |
| 16 | <b>CAPZB</b>                     | F-actin-capping protein subunit beta                                                                                                                            | High       | Y         | 0.01                | 0.65 | 1.21 |
| 17 | <b>CARM1</b>                     | Histone-arginine methyltransferase CARM1                                                                                                                        | High       | Y         | 0.09                | 0.80 | 1.87 |
| 18 | <b>CHMP1A</b>                    | Charged multivesicular body protein 1a                                                                                                                          | High       | N         | 0.72                | 1.95 | 2.27 |
| 19 | <b>CKAP4</b>                     | Cytoskeleton-associated protein 4                                                                                                                               | High       | Y         | 0.06                | 0.65 | 1.27 |
| 20 | <b>CPPED1</b>                    | Calcineurin-like phosphoesterase domain-containing protein 1                                                                                                    | High       | Y         | 0.97                | 2.04 | 2.69 |
| 21 | <b>CRKL</b>                      | Crk-like protein                                                                                                                                                | High       | Y         | 0.33                | 0.76 | 1.60 |
| 22 | <b>DFFA</b>                      | DNA fragmentation factor subunit alpha                                                                                                                          | High       | Y         | 0.26                | 1.18 | 2.19 |
| 23 | <b>DHX15</b>                     | Putative pre-mRNA-splicing factor ATP-dependent RNA helicase DHX15                                                                                              | High       | Y         | 0.09                | 0.77 | 1.31 |
| 24 | <b>DNPEP</b>                     | Aspartyl aminopeptidase                                                                                                                                         | High       | Y         | 0.06                | 0.64 | 1.74 |
| 25 | <b>DSP</b>                       | Desmoplakin                                                                                                                                                     | High       | N         | 0.09                | 0.63 | 1.37 |
| 26 | <b>DUT</b>                       | Deoxyuridine 5-triphosphate nucleotidohydrolase, mitochondrial                                                                                                  | High       | Y         | 0.14                | 0.68 | 1.57 |
| 27 | <b>DYNLL1;DYNLL2</b>             | Dynein light chain 1, cytoplasmic;Dynein light chain 2, cytoplasmic                                                                                             | High       | Y         | 0.11                | 0.62 | 1.94 |
| 28 | <b>EEA1</b>                      | Early endosome antigen 1                                                                                                                                        | High       | Y         | 0.29                | 0.95 | 1.35 |

|    | Gene names     | Protein names                                                                                                                                                                                                                                                                                          | Confidence | Conserved | Log <sub>2</sub> QS |      |      |
|----|----------------|--------------------------------------------------------------------------------------------------------------------------------------------------------------------------------------------------------------------------------------------------------------------------------------------------------|------------|-----------|---------------------|------|------|
|    |                |                                                                                                                                                                                                                                                                                                        |            |           | Sulforaphane (μM)   |      |      |
|    |                |                                                                                                                                                                                                                                                                                                        |            |           | 5                   | 25   | 100  |
| 29 | <b>ELAC2</b>   | Zinc phosphodiesterase ELAC protein 2                                                                                                                                                                                                                                                                  | High       | Y         | 0.13                | 0.71 | 1.36 |
| 30 | <b>EPB41L5</b> | Band 4.1-like protein 5                                                                                                                                                                                                                                                                                | High       | N         | 0.12                | 0.93 | 1.45 |
| 31 | <b>ESYT1</b>   | Extended synaptotagmin-1                                                                                                                                                                                                                                                                               | High       | Y         | 0.09                | 0.65 | 1.33 |
| 32 | <b>EXOSC6</b>  | Exosome complex component MTR3                                                                                                                                                                                                                                                                         | High       | Y         | 0.10                | 0.87 | 2.31 |
| 33 | <b>FAM120A</b> | Constitutive coactivator of PPAR-gamma-like protein 1                                                                                                                                                                                                                                                  | High       | Y         | 0.08                | 0.78 | 1.68 |
| 34 | <b>FAM203A</b> | Protein FAM203A                                                                                                                                                                                                                                                                                        | High       | Y         | 0.35                | 1.53 | 2.46 |
| 35 | <b>FAM83H</b>  | Protein FAM83H                                                                                                                                                                                                                                                                                         | High       | N         | 0.00                | 0.83 | 1.54 |
| 36 | <b>FXR1</b>    | Fragile X mental retardation syndrome-related protein 1                                                                                                                                                                                                                                                | High       | Y         | 0.06                | 0.91 | 2.10 |
| 37 | <b>GAK</b>     | Cyclin-G-associated kinase                                                                                                                                                                                                                                                                             | High       | N         | 0.03                | 0.56 | 1.52 |
| 38 | <b>GEMIN5</b>  | Gem-associated protein 5                                                                                                                                                                                                                                                                               | High       | Y         | 0.01                | 0.60 | 1.43 |
| 39 | <b>GLOD4</b>   | Glyoxalase domain-containing protein 4                                                                                                                                                                                                                                                                 | High       | Y         | 0.07                | 0.67 | 1.70 |
| 40 | <b>GNA13</b>   | Guanine nucleotide-binding protein subunit alpha-13                                                                                                                                                                                                                                                    | High       | N         | 0.14                | 0.93 | 1.20 |
| 41 | <b>GOLGA2</b>  | Golgin subfamily A member 2                                                                                                                                                                                                                                                                            | High       | Y         | 0.04                | 0.64 | 1.76 |
| 42 | <b>GREB1</b>   | Protein GREB1                                                                                                                                                                                                                                                                                          | High       | N         | 0.09                | 0.75 | 2.27 |
| 43 | <b>GSR</b>     | Glutathione reductase, mitochondrial                                                                                                                                                                                                                                                                   | High       | N         | 0.17                | 0.84 | 1.56 |
| 44 | <b>GSTM3</b>   | Glutathione S-transferase Mu 3                                                                                                                                                                                                                                                                         | High       | Y         | -0.01               | 0.48 | 0.94 |
| 45 | <b>HAT1</b>    | Histone acetyltransferase type B catalytic subunit                                                                                                                                                                                                                                                     | High       | Y         | 0.12                | 1.03 | 2.17 |
| 46 | <b>HCFC1</b>   | Host cell factor 1;HCF N-terminal chain 1;HCF N-terminal chain 2;HCF N-terminal chain 3;HCF N-terminal chain 4;HCF N-terminal chain 5;HCF N-terminal chain 6;HCF C-terminal chain 1;HCF C-terminal chain 2;HCF C-terminal chain 3;HCF C-terminal chain 4;HCF C-terminal chain 5;HCF C-terminal chain 6 | High       | Y         | 0.05                | 0.68 | 1.77 |
| 47 | <b>HDHD3</b>   | Haloacid dehalogenase-like hydrolase domain-containing protein 3                                                                                                                                                                                                                                       | High       | N         | 0.37                | 1.44 | 1.58 |
| 48 | <b>HMOX2</b>   | Heme oxygenase 2                                                                                                                                                                                                                                                                                       | High       | Y         | 0.21                | 1.11 | 2.09 |
| 49 | <b>HSPB1</b>   | Heat shock protein beta-1                                                                                                                                                                                                                                                                              | High       | Y         | -0.01               | 0.50 | 1.58 |
| 50 | <b>IDE</b>     | Insulin-degrading enzyme                                                                                                                                                                                                                                                                               | High       | N         | 0.09                | 0.89 | 1.21 |
| 51 | <b>INPP4B</b>  | Type II inositol 3,4-bisphosphate 4-phosphatase                                                                                                                                                                                                                                                        | High       | N         | 0.05                | 0.47 | 1.45 |
| 52 | <b>IPO5</b>    | Importin-5                                                                                                                                                                                                                                                                                             | High       | Y         | 0.13                | 0.62 | 1.02 |
| 53 | <b>IRAK1</b>   | Interleukin-1 receptor-associated kinase 1                                                                                                                                                                                                                                                             | High       | N         | 0.35                | 1.38 | 1.40 |
| 54 | <b>ITGB4</b>   | Integrin beta-4                                                                                                                                                                                                                                                                                        | High       | N         | 0.08                | 0.60 | 1.17 |
| 55 | <b>ITPK1</b>   | Inositol-tetrakisphosphate 1-kinase                                                                                                                                                                                                                                                                    | High       | N         | -0.02               | 0.76 | 2.11 |
| 56 | <b>KDM3B</b>   | Lysine-specific demethylase 3B                                                                                                                                                                                                                                                                         | High       | Y         | 0.26                | 1.12 | 2.11 |
| 57 | <b>KEAP1</b>   | Kelch-like ECH-associated protein 1                                                                                                                                                                                                                                                                    | High       | Y         | 2.47                | 3.40 | 5.28 |
| 58 | <b>KHSRP</b>   | Far upstream element-binding protein 2                                                                                                                                                                                                                                                                 | High       | Y         | 0.20                | 0.78 | 1.35 |
| 59 | <b>LANCL2</b>  | LanC-like protein 2                                                                                                                                                                                                                                                                                    | High       | Y         | 0.24                | 0.88 | 1.92 |
| 60 | <b>LPCAT1</b>  | Lysophosphatidylcholine acyltransferase 1                                                                                                                                                                                                                                                              | High       | N         | 0.12                | 0.60 | 1.44 |
| 61 | <b>LPP</b>     | Lipoma-preferred partner                                                                                                                                                                                                                                                                               | High       | N         | NaN                 | 0.57 | 0.94 |
| 62 | <b>MCMBP</b>   | Mini-chromosome maintenance complex-binding protein                                                                                                                                                                                                                                                    | High       | Y         | 0.07                | 0.73 | 2.09 |
| 63 | <b>MIF</b>     | Macrophage migration inhibitory factor                                                                                                                                                                                                                                                                 | High       | Y         | 2.89                | 3.24 | 2.93 |
| 64 | <b>MMS19</b>   | MMS19 nucleotide excision repair protein homolog                                                                                                                                                                                                                                                       | High       | Y         | 0.09                | 0.72 | 1.73 |
| 65 | <b>MRPL39</b>  | 39S ribosomal protein L39, mitochondrial                                                                                                                                                                                                                                                               | High       | Y         | 0.36                | 0.89 | 1.54 |
| 66 | <b>MTCH2</b>   | Mitochondrial carrier homolog 2                                                                                                                                                                                                                                                                        | High       | Y         | 0.43                | 1.14 | 1.66 |
| 67 | <b>MTHFD1L</b> | Monofunctional C1-tetrahydrofolate synthase, mitochondrial                                                                                                                                                                                                                                             | High       | Y         | 0.03                | 0.71 | 1.53 |

|     | Gene names                | Protein names                                                                                   | Confidence | Conserved | Log <sub>2</sub> QS |      |      |
|-----|---------------------------|-------------------------------------------------------------------------------------------------|------------|-----------|---------------------|------|------|
|     |                           |                                                                                                 |            |           | Sulforaphane (μM)   |      |      |
|     |                           |                                                                                                 |            |           | 5                   | 25   | 100  |
| 68  | <b>MYH14</b>              | Myosin-14                                                                                       | High       | N         | 0.22                | 1.22 | 2.28 |
| 69  | <b>NADK2</b>              | NAD kinase 2, mitochondrial                                                                     | High       | Y         | 0.52                | 1.43 | 2.39 |
| 70  | <b>NCAPD2</b>             | Condensin complex subunit 1                                                                     | High       | Y         | 0.11                | 1.01 | 1.80 |
| 71  | <b>NPEPL1</b>             | Probable aminopeptidase NPEPL1                                                                  | High       | N         | 0.27                | 1.24 | 2.29 |
| 72  | <b>NT5DC1</b>             | 5-nucleotidase domain-containing protein 1                                                      | High       | N         | 0.23                | 0.96 | 1.67 |
| 73  | <b>NUDCD1</b>             | NudC domain-containing protein 1                                                                | High       | Y         | 0.07                | 0.71 | 1.59 |
| 74  | <b>NUP155</b>             | Nuclear pore complex protein Nup155                                                             | High       | Y         | 0.06                | 0.86 | 1.57 |
| 75  | <b>NUP54</b>              | Nucleoporin p54                                                                                 | High       | Y         | 0.03                | 0.96 | 2.58 |
| 76  | <b>OGFR</b>               | Opioid growth factor receptor                                                                   | High       | Y         | 0.04                | 0.74 | 1.58 |
| 77  | <b>PCYT1A;<br/>PCYT1B</b> | Choline-phosphate cytidylyltransferase A;Choline-phosphate cytidylyltransferase B               | High       | Y         | 0.02                | 0.79 | 1.74 |
| 78  | <b>PES1</b>               | Pescadillo homolog                                                                              | High       | N         | 0.25                | 0.99 | 1.95 |
| 79  | <b>PEX11B</b>             | Peroxisomal membrane protein 11B                                                                | High       | N         | 0.07                | 0.78 | 1.50 |
| 80  | <b>PFAS</b>               | Phosphoribosylformylglycinamide synthase                                                        | High       | Y         | -0.01               | 0.63 | 1.06 |
| 81  | <b>PGLS</b>               | 6-phosphogluconolactonase                                                                       | High       | Y         | 0.07                | 1.04 | 1.78 |
| 82  | <b>PHGDH</b>              | D-3-phosphoglycerate dehydrogenase                                                              | High       | N         | 0.08                | 0.48 | 1.08 |
| 83  | <b>PLCG1</b>              | 1-phosphatidylinositol 4,5-bisphosphate phosphodiesterase gamma-1                               | High       | Y         | 0.05                | 0.64 | 1.63 |
| 84  | <b>PLIN3</b>              | Perilipin-3                                                                                     | High       | Y         | 0.06                | 0.75 | 1.72 |
| 85  | <b>PPM1G</b>              | Protein phosphatase 1G                                                                          | High       | Y         | 0.03                | 0.57 | 1.43 |
| 86  | <b>PREP</b>               | Prolyl endopeptidase                                                                            | High       | Y         | 0.11                | 0.76 | 1.94 |
| 87  | <b>PRKRA</b>              | Interferon-inducible double stranded RNA-dependent protein kinase activator A                   | High       | N         | 0.20                | 0.78 | 1.33 |
| 88  | <b>PRMT3</b>              | Protein arginine N-methyltransferase 3                                                          | High       | Y         | 0.11                | 0.84 | 1.56 |
| 89  | <b>PSMD9</b>              | 26S proteasome non-ATPase regulatory subunit 9                                                  | High       | Y         | 0.04                | 0.80 | 2.21 |
| 90  | <b>PSME2</b>              | Proteasome activator complex subunit 2                                                          | High       | Y         | 0.10                | 0.81 | 1.75 |
| 91  | <b>PTGES3</b>             | Prostaglandin E synthase 3                                                                      | High       | Y         | 0.09                | 0.62 | 1.36 |
| 92  | <b>PTPN1</b>              | Tyrosine-protein phosphatase non-receptor type 1;Tyrosine-protein phosphatase non-receptor type | High       | Y         | 0.16                | 0.85 | 1.36 |
| 93  | <b>PTPN11</b>             | Tyrosine-protein phosphatase non-receptor type 11                                               | High       | Y         | 0.16                | 0.87 | 1.72 |
| 94  | <b>PUS1</b>               | tRNA pseudouridine synthase;tRNA pseudouridine synthase A, mitochondrial                        | High       | N         | 0.11                | 0.80 | 1.30 |
| 95  | <b>PXN</b>                | Paxillin                                                                                        | High       | Y         | -0.04               | 0.59 | 1.09 |
| 96  | <b>RANBP6</b>             | Ran-binding protein 6                                                                           | High       | Y         | 0.39                | 1.24 | 2.11 |
| 97  | <b>RELA</b>               | Transcription factor p65                                                                        | High       | Y         | 0.25                | 1.01 | 1.21 |
| 98  | <b>RNF114</b>             | RING finger protein 114                                                                         | High       | N         | 0.21                | 0.84 | 1.50 |
| 99  | <b>RNPEP</b>              | Aminopeptidase B                                                                                | High       | Y         | 0.14                | 0.74 | 1.25 |
| 100 | <b>RPS6KA1</b>            | Ribosomal protein S6 kinase alpha-1;Ribosomal protein S6 kinase                                 | High       | Y         | -0.01               | 0.86 | 1.88 |
| 101 | <b>RPS6KA3</b>            | Ribosomal protein S6 kinase alpha-3                                                             | High       | Y         | 0.00                | 0.57 | 2.14 |
| 102 | <b>RTFDC1</b>             | Protein RTF2 homolog                                                                            | High       | N         | -0.02               | 0.57 | 1.57 |
| 103 | <b>RTN3</b>               | Reticulon-3                                                                                     | High       | Y         | 0.17                | 0.99 | 1.50 |
| 104 | <b>RUFY1</b>              | RUN and FYVE domain-containing protein 1                                                        | High       | Y         | 0.02                | 0.84 | 1.37 |
| 105 | <b>S100A14</b>            | Protein S100-A14                                                                                | High       | N         | 0.20                | 0.65 | 1.47 |
| 106 | <b>SEC63</b>              | Translocation protein SEC63 homolog                                                             | High       | Y         | 0.20                | 0.89 | 1.55 |
| 107 | <b>SFN</b>                | 14-3-3 protein sigma                                                                            | High       | Y         | 0.04                | 0.54 | 1.09 |
| 108 | <b>SH3GL1</b>             | Endophilin-A2                                                                                   | High       | N         | 0.18                | 0.93 | 1.72 |

|     | Gene names             | Protein names                                                                                                                     | Confidence | Conserved | Log <sub>2</sub> QS |      |       |
|-----|------------------------|-----------------------------------------------------------------------------------------------------------------------------------|------------|-----------|---------------------|------|-------|
|     |                        |                                                                                                                                   |            |           | Sulforaphane (μM)   |      |       |
|     |                        |                                                                                                                                   |            |           | 5                   | 25   | 100   |
| 109 | <b>SPTLC1</b>          | Serine palmitoyltransferase 1                                                                                                     | High       | N         | 0.21                | 0.64 | 1.18  |
| 110 | <b>SQSTM1</b>          | Sequestosome-1                                                                                                                    | High       | Y         | 0.06                | 0.80 | 1.67  |
| 111 | <b>STAT1</b>           | Signal transducer and activator of transcription 1-alpha/beta                                                                     | High       | Y         | 0.02                | 0.63 | 1.58  |
| 112 | <b>STAT3</b>           | Signal transducer and activator of transcription 3                                                                                | High       | Y         | 0.12                | 0.74 | 1.54  |
| 113 | <b>STK3</b>            | Serine/threonine-protein kinase 3;Serine/threonine-protein kinase 3 36kDa subunit;Serine/threonine-protein kinase 3 20kDa subunit | High       | Y         | 0.37                | 1.91 | 3.52  |
| 114 | <b>STK4</b>            | Serine/threonine-protein kinase 4;Serine/threonine-protein kinase 4 37kDa subunit;Serine/threonine-protein kinase 4 18kDa subunit | High       | Y         | 0.49                | 2.02 | 2.96  |
| 115 | <b>SUGT1</b>           | Suppressor of G2 allele of SKP1 homolog                                                                                           | High       | Y         | 0.44                | 1.07 | 2.15  |
| 116 | <b>TBC1D15</b>         | TBC1 domain family member 15                                                                                                      | High       | Y         | 0.02                | 0.70 | 1.41  |
| 117 | <b>TCF25</b>           | Transcription factor 25                                                                                                           | High       | N         | 0.19                | 0.74 | 1.54  |
| 118 | <b>THNSL1</b>          | Threonine synthase-like 1                                                                                                         | High       | Y         | 0.14                | 0.98 | 1.92  |
| 119 | <b>TIGAR</b>           | Fructose-2,6-bisphosphatase TIGAR                                                                                                 | High       | Y         | 0.10                | 0.88 | 2.23  |
| 120 | <b>TMPO</b>            | Lamina-associated polypeptide 2, isoform alpha;Thymopoietin;Thymopentin                                                           | High       | Y         | 0.27                | 0.74 | 1.40  |
| 121 | <b>TNKS1BP1</b>        | 182 kDa tankyrase-1-binding protein                                                                                               | High       | Y         | -0.01               | 0.56 | 1.40  |
| 122 | <b>TRIM33</b>          | E3 ubiquitin-protein ligase TRIM33                                                                                                | High       | N         | -0.02               | 0.62 | 1.32  |
| 123 | <b>TXLNG</b>           | Gamma-taxilin                                                                                                                     | High       | Y         | -0.06               | 0.70 | 1.56  |
| 124 | <b>USP10</b>           | Ubiquitin carboxyl-terminal hydrolase 10                                                                                          | High       | Y         | 0.25                | 0.97 | 1.95  |
| 125 | <b>USP7</b>            | Ubiquitin carboxyl-terminal hydrolase 7;Ubiquitin carboxyl-terminal hydrolase                                                     | High       | Y         | 0.04                | 0.57 | 1.45  |
| 126 | <b>VDAC2</b>           | Voltage-dependent anion-selective channel protein 2                                                                               | High       | Y         | 0.20                | 0.87 | 1.63  |
| 127 | <b>VDAC3</b>           | Voltage-dependent anion-selective channel protein 3                                                                               | High       | Y         | 0.27                | 1.09 | 2.24  |
| 128 | <b>WDR77</b>           | Methylosome protein 50                                                                                                            | High       | Y         | 0.14                | 0.75 | 1.33  |
| 129 | <b>XPO5</b>            | Exportin-5                                                                                                                        | High       | Y         | 0.10                | 0.61 | 1.42  |
| 130 | <b>ADAR</b>            | Double-stranded RNA-specific adenosine deaminase                                                                                  | Medium     | Y         | 0.18                | 0.53 | 1.14  |
| 131 | <b>ADRM1</b>           | Proteasomal ubiquitin receptor ADRM1                                                                                              | Medium     | Y         | 0.08                | 0.71 | 1.50  |
| 132 | <b>AGAP3</b>           | Arf-GAP with GTPase, ANK repeat and PH domain-containing protein 3                                                                | Medium     | N         | -0.20               | 0.58 | NaN   |
| 133 | <b>AHCY</b>            | Adenosylhomocysteinase                                                                                                            | Medium     | Y         | -0.01               | 0.41 | 1.03  |
| 134 | <b>AHNAK</b>           | Neuroblast differentiation-associated protein AHNAK                                                                               | Medium     | N         | -0.08               | 0.46 | 0.87  |
| 135 | <b>AIM1</b>            | Absent in melanoma 1 protein                                                                                                      | Medium     | N         | 0.30                | 1.16 | 2.26  |
| 136 | <b>AIMP2</b>           | Aminoacyl tRNA synthase complex-interacting multifunctional protein 2                                                             | Medium     | Y         | 0.04                | 0.54 | 1.33  |
| 137 | <b>ANKHD1; ANKRD17</b> | Ankyrin repeat and KH domain-containing protein 1;Ankyrin repeat domain-containing protein 17                                     | Medium     | N         | -0.21               | 0.45 | 1.14  |
| 138 | <b>AP4E1</b>           | AP-4 complex subunit epsilon-1                                                                                                    | Medium     | N         | 0.18                | 1.01 | -0.44 |
| 139 | <b>ARAF</b>            | Serine/threonine-protein kinase A-Raf                                                                                             | Medium     | N         | 0.11                | 0.74 | 1.30  |
| 140 | <b>ASNS</b>            | Asparagine synthetase [glutamine-hydrolyzing]                                                                                     | Medium     | Y         | 0.03                | 0.39 | 1.17  |
| 141 | <b>ASPSCR1</b>         | Tether containing UBX domain for GLUT4                                                                                            | Medium     | N         | 0.22                | 1.16 | NaN   |
| 142 | <b>ATXN2L</b>          | Ataxin-2-like protein                                                                                                             | Medium     | Y         | 0.04                | 0.50 | 1.29  |
| 143 | <b>BAG3</b>            | BAG family molecular chaperone regulator 3                                                                                        | Medium     | Y         | 0.00                | 0.48 | 1.37  |
| 144 | <b>BAG6</b>            | Large proline-rich protein BAG6                                                                                                   | Medium     | Y         | 0.08                | 0.35 | 0.97  |
| 145 | <b>BAX</b>             | Apoptosis regulator BAX                                                                                                           | Medium     | N         | -0.01               | 0.57 | 1.51  |
| 146 | <b>BRAT1</b>           | BRCA1-associated ATM activator 1                                                                                                  | Medium     | N         | 0.02                | 0.29 | 1.25  |

|     | Gene names              | Protein names                                                                                                                                                                                                                                                                                                                   | Confidence | Conserved | Log <sub>2</sub> QS |      |      |
|-----|-------------------------|---------------------------------------------------------------------------------------------------------------------------------------------------------------------------------------------------------------------------------------------------------------------------------------------------------------------------------|------------|-----------|---------------------|------|------|
|     |                         |                                                                                                                                                                                                                                                                                                                                 |            |           | Sulforaphane (μM)   |      |      |
|     |                         |                                                                                                                                                                                                                                                                                                                                 |            |           | 5                   | 25   | 100  |
| 147 | <b>CARS</b>             | Cysteine--tRNA ligase, cytoplasmic                                                                                                                                                                                                                                                                                              | Medium     | Y         | 0.15                | 0.87 | 1.88 |
| 148 | <b>CASP2</b>            | Caspase-2;Caspase-2 subunit p18;Caspase-2 subunit p13;Caspase-2 subunit p12                                                                                                                                                                                                                                                     | Medium     | N         | -0.11               | 0.72 | 2.10 |
| 149 | <b>CCDC6</b>            | Coiled-coil domain-containing protein 6                                                                                                                                                                                                                                                                                         | Medium     | N         | 0.12                | 0.74 | 1.46 |
| 150 | <b>CDK2</b>             | Cyclin-dependent kinase 2                                                                                                                                                                                                                                                                                                       | Medium     | N         | 0.22                | 0.77 | 1.22 |
| 151 | <b>CLN3</b>             | Battenin                                                                                                                                                                                                                                                                                                                        | Medium     | N         | 0.29                | 0.88 | 1.79 |
| 152 | <b>CPT1A</b>            | Carnitine O-palmitoyltransferase 1, liver isoform                                                                                                                                                                                                                                                                               | Medium     | Y         | 0.08                | 0.52 | 1.43 |
| 153 | <b>CTSB</b>             | Cathepsin B;Cathepsin B light chain;Cathepsin B heavy chain                                                                                                                                                                                                                                                                     | Medium     | Y         | 0.29                | 0.74 | 1.13 |
| 154 | <b>CTSC</b>             | Dipeptidyl peptidase 1;Dipeptidyl peptidase 1 exclusion domain chain;Dipeptidyl peptidase 1 heavy chain;Dipeptidyl peptidase 1 light chain                                                                                                                                                                                      | Medium     | Y         | 0.10                | 0.88 | NaN  |
| 155 | <b>CTTN</b>             | Src substrate cortactin                                                                                                                                                                                                                                                                                                         | Medium     | Y         | 0.02                | 0.28 | 0.99 |
| 156 | <b>CYFIP1</b>           | Cytoplasmic FMR1-interacting protein 1                                                                                                                                                                                                                                                                                          | Medium     | N         | 0.14                | 0.60 | 1.24 |
| 157 | <b>DCTPP1</b>           | dCTP pyrophosphatase 1                                                                                                                                                                                                                                                                                                          | Medium     | N         | 0.21                | 0.13 | 0.81 |
| 158 | <b>DDX3X;D<br/>DX3Y</b> | ATP-dependent RNA helicase DDX3X;ATP-dependent RNA helicase DDX3Y                                                                                                                                                                                                                                                               | Medium     | N         | -0.02               | 0.33 | 0.81 |
| 159 | <b>DIAPH1</b>           | Protein diaphanous homolog 1                                                                                                                                                                                                                                                                                                    | Medium     | Y         | 0.08                | 0.45 | 0.96 |
| 160 | <b>DNM1L</b>            | Dynamin-1-like protein                                                                                                                                                                                                                                                                                                          | Medium     | Y         | -0.15               | 0.21 | 0.83 |
| 161 | <b>DSTN</b>             | Destrin                                                                                                                                                                                                                                                                                                                         | Medium     | Y         | 0.00                | 0.31 | 0.95 |
| 162 | <b>EDC4</b>             | Enhancer of mRNA-decapping protein 4                                                                                                                                                                                                                                                                                            | Medium     | Y         | 0.00                | 0.42 | 0.92 |
| 163 | <b>EIF3G</b>            | Eukaryotic translation initiation factor 3 subunit G                                                                                                                                                                                                                                                                            | Medium     | Y         | -0.19               | 0.30 | 0.74 |
| 164 | <b>EPRS</b>             | Bifunctional glutamate/proline--tRNA ligase;Glutamate--tRNA ligase;Proline--tRNA ligase                                                                                                                                                                                                                                         | Medium     | Y         | -0.03               | 0.30 | 0.91 |
| 165 | <b>EPS8L2</b>           | Epidermal growth factor receptor kinase substrate 8-like protein 2                                                                                                                                                                                                                                                              | Medium     | Y         | -0.05               | 0.49 | 1.26 |
| 166 | <b>FASN</b>             | Fatty acid synthase;[Acyl-carrier-protein] S-acetyltransferase;[Acyl-carrier-protein] S-malonyltransferase;3-oxoacyl-[acyl-carrier-protein] synthase;3-oxoacyl-[acyl-carrier-protein] reductase;3-hydroxyacyl-[acyl-carrier-protein] dehydratase;Enoyl-[acyl-carrier-protein] reductase;Oleoyl-[acyl-carrier-protein] hydrolase | Medium     | Y         | 0.06                | 0.50 | 0.82 |
| 167 | <b>FBXO22</b>           | F-box only protein 22                                                                                                                                                                                                                                                                                                           | Medium     | N         | 0.05                | 0.95 | NaN  |
| 168 | <b>FLII</b>             | Protein flightless-1 homolog                                                                                                                                                                                                                                                                                                    | Medium     | Y         | -0.04               | 0.30 | 1.00 |
| 169 | <b>FMR1</b>             | Fragile X mental retardation protein 1                                                                                                                                                                                                                                                                                          | Medium     | Y         | 0.00                | 1.28 | 2.04 |
| 170 | <b>FXR2</b>             | Fragile X mental retardation syndrome-related protein 2                                                                                                                                                                                                                                                                         | Medium     | Y         | 0.35                | 1.04 | 2.07 |
| 171 | <b>GARS</b>             | Glycine--tRNA ligase                                                                                                                                                                                                                                                                                                            | Medium     | Y         | 0.01                | 0.45 | 1.03 |
| 172 | <b>GART</b>             | Trifunctional purine biosynthetic protein adenosine-3;Phosphoribosylamine--glycine ligase;Phosphoribosylformylglycinamide cyclo-ligase;Phosphoribosylglycinamide formyltransferase                                                                                                                                              | Medium     | Y         | -0.02               | 0.27 | 0.67 |
| 173 | <b>GCLC</b>             | Glutamate--cysteine ligase catalytic subunit                                                                                                                                                                                                                                                                                    | Medium     | N         | 0.67                | 1.91 | 2.10 |
| 174 | <b>GFPT1</b>            | Glutamine--fructose-6-phosphate aminotransferase [isomerizing] 1                                                                                                                                                                                                                                                                | Medium     | Y         | 0.08                | 0.66 | 1.34 |
| 175 | <b>GMPPB</b>            | Mannose-1-phosphate guanylttransferase beta                                                                                                                                                                                                                                                                                     | Medium     | N         | 0.14                | 0.44 | 1.09 |
| 176 | <b>GMPS</b>             | GMP synthase [glutamine-hydrolyzing]                                                                                                                                                                                                                                                                                            | Medium     | Y         | -0.07               | 0.39 | 0.93 |
| 177 | <b>GNB2</b>             | Guanine nucleotide-binding protein G(I)/G(S)/G(T) subunit beta-2                                                                                                                                                                                                                                                                | Medium     | N         | 0.06                | 0.43 | 1.12 |
| 178 | <b>GRPEL1</b>           | GrpE protein homolog 1, mitochondrial                                                                                                                                                                                                                                                                                           | Medium     | N         | -0.03               | 0.30 | 0.66 |
| 179 | <b>GSPT1</b>            | Eukaryotic peptide chain release factor GTP-binding subunit ERF3A                                                                                                                                                                                                                                                               | Medium     | N         | 0.07                | 0.46 | 1.17 |
| 180 | <b>HCCS</b>             | Cytochrome c-type heme lyase                                                                                                                                                                                                                                                                                                    | Medium     | Y         | 0.12                | 1.00 | 2.07 |
| 181 | <b>HDGF</b>             | Hepatoma-derived growth factor                                                                                                                                                                                                                                                                                                  | Medium     | Y         | 0.07                | 0.36 | 1.58 |

|     | Gene names                   | Protein names                                                                                               | Confidence | Conserved | Log <sub>2</sub> QS |      |      |
|-----|------------------------------|-------------------------------------------------------------------------------------------------------------|------------|-----------|---------------------|------|------|
|     |                              |                                                                                                             |            |           | Sulforaphane (μM)   |      |      |
|     |                              |                                                                                                             |            |           | 5                   | 25   | 100  |
| 182 | <b>HDLBP</b>                 | Vigilin                                                                                                     | Medium     | N         | 0.01                | 0.30 | 0.71 |
| 183 | <b>HEATR6</b>                | HEAT repeat-containing protein 6                                                                            | Medium     | N         | -0.02               | 0.31 | 0.79 |
| 184 | <b>HECTD1</b>                | E3 ubiquitin-protein ligase HECTD1                                                                          | Medium     | Y         | -0.11               | 0.35 | 1.22 |
| 185 | <b>HNRNPF</b>                | Heterogeneous nuclear ribonucleoprotein F;Heterogeneous nuclear ribonucleoprotein F, N-terminally processed | Medium     | Y         | 0.04                | 0.65 | 1.34 |
| 186 | <b>HNRNPK</b>                | Heterogeneous nuclear ribonucleoprotein K                                                                   | Medium     | N         | -0.03               | 0.37 | 0.78 |
| 187 | <b>HNRNPU L2;hCG_2044799</b> | Heterogeneous nuclear ribonucleoprotein U-like protein 2                                                    | Medium     | N         | 0.15                | 0.48 | 1.08 |
| 188 | <b>HPRT1</b>                 | Hypoxanthine-guanine phosphoribosyltransferase                                                              | Medium     | Y         | -0.05               | 0.32 | 1.04 |
| 189 | <b>HSD17B10</b>              | 3-hydroxyacyl-CoA dehydrogenase type-2                                                                      | Medium     | Y         | 0.05                | 0.47 | 1.15 |
| 190 | <b>HSDL1</b>                 | Inactive hydroxysteroid dehydrogenase-like protein 1                                                        | Medium     | N         | 0.04                | 0.48 | 1.02 |
| 191 | <b>HSPBP1</b>                | Hsp70-binding protein 1                                                                                     | Medium     | Y         | 0.01                | 0.26 | 2.03 |
| 192 | <b>HSPH1</b>                 | Heat shock protein 105 kDa                                                                                  | Medium     | Y         | -0.02               | 0.20 | 0.70 |
| 193 | <b>HUWE1</b>                 | E3 ubiquitin-protein ligase HUWE1                                                                           | Medium     | Y         | 0.01                | 0.43 | 1.17 |
| 194 | <b>IMPDH2</b>                | Inosine-5-monophosphate dehydrogenase 2                                                                     | Medium     | Y         | 0.08                | 0.36 | 0.76 |
| 195 | <b>INF2</b>                  | Inverted formin-2                                                                                           | Medium     | Y         | 0.07                | 0.39 | 0.83 |
| 196 | <b>INPL1</b>                 | Phosphatidylinositol 3,4,5-trisphosphate 5-phosphatase 2                                                    | Medium     | N         | 0.17                | 0.70 | 1.27 |
| 197 | <b>ISOC2</b>                 | Isochorismatase domain-containing protein 2, mitochondrial                                                  | Medium     | Y         | 0.07                | 0.56 | 1.77 |
| 198 | <b>KIAA1598</b>              | Shootin-1                                                                                                   | Medium     | N         | -0.06               | 0.45 | 1.37 |
| 199 | <b>KLC1</b>                  | Kinesin light chain 1                                                                                       | Medium     | Y         | 0.03                | 0.52 | 1.37 |
| 200 | <b>KTN1</b>                  | Kinectin                                                                                                    | Medium     | N         | 0.05                | 0.37 | 0.93 |
| 201 | <b>LACTB</b>                 | Serine beta-lactamase-like protein LACTB, mitochondrial                                                     | Medium     | Y         | 0.35                | 1.04 | 1.66 |
| 202 | <b>LARP1</b>                 | La-related protein 1                                                                                        | Medium     | Y         | 0.05                | 0.52 | 1.03 |
| 203 | <b>LARP4</b>                 | La-related protein 4                                                                                        | Medium     | Y         | -0.16               | 0.14 | 1.01 |
| 204 | <b>LARP4B</b>                | La-related protein 4B                                                                                       | Medium     | Y         | 0.09                | 0.41 | 1.00 |
| 205 | <b>LCMT1</b>                 | Leucine carboxyl methyltransferase 1                                                                        | Medium     | Y         | 0.09                | 1.09 | NaN  |
| 206 | <b>LGALS1</b>                | Galectin-1                                                                                                  | Medium     | Y         | 0.02                | 0.40 | 1.00 |
| 207 | <b>LRBA</b>                  | Lipopolysaccharide-responsive and beige-like anchor protein                                                 | Medium     | N         | -0.09               | 0.25 | 0.90 |
| 208 | <b>MACROD1</b>               | O-acetyl-ADP-ribose deacetylase MACROD1                                                                     | Medium     | N         | -0.06               | 0.70 | 1.29 |
| 209 | <b>MAVS</b>                  | Mitochondrial antiviral-signaling protein                                                                   | Medium     | Y         | 0.06                | 0.54 | 1.33 |
| 210 | <b>MCCC2</b>                 | Methylcrotonoyl-CoA carboxylase beta chain, mitochondrial                                                   | Medium     | N         | -0.01               | 0.34 | 0.83 |
| 211 | <b>MCM3</b>                  | DNA replication licensing factor MCM3                                                                       | Medium     | Y         | 0.01                | 0.39 | 1.14 |
| 212 | <b>MEPCE</b>                 | 7SK snRNA methylphosphate capping enzyme                                                                    | Medium     | N         | -0.11               | 0.49 | 1.68 |
| 213 | <b>MTA2</b>                  | Metastasis-associated protein MTA2                                                                          | Medium     | Y         | 0.21                | 0.83 | 1.14 |
| 214 | <b>MVD</b>                   | Diphosphomevalonate decarboxylase                                                                           | Medium     | N         | 0.12                | 0.74 | 1.90 |
| 215 | <b>MYH9</b>                  | Myosin-9                                                                                                    | Medium     | Y         | -0.05               | 0.24 | 0.90 |
| 216 | <b>MYL6</b>                  | Myosin light polypeptide 6                                                                                  | Medium     | Y         | -0.09               | 0.31 | 1.18 |
| 217 | <b>NCAPH</b>                 | Condensin complex subunit 2                                                                                 | Medium     | Y         | 0.34                | 0.63 | 1.81 |
| 218 | <b>NFKB2</b>                 | Nuclear factor NF-kappa-B p100 subunit;Nuclear factor NF-kappa-B p52 subunit                                | Medium     | Y         | 0.44                | 0.66 | 1.37 |
| 219 | <b>NONO</b>                  | Non-POU domain-containing octamer-binding protein                                                           | Medium     | Y         | 0.03                | 0.22 | 0.87 |
| 220 | <b>NR2F2;NR2F1</b>           | COUP transcription factor 2;COUP transcription factor 1                                                     | Medium     | Y         | 0.03                | 0.77 | 1.34 |
| 221 | <b>NUDC</b>                  | Nuclear migration protein nudC                                                                              | Medium     | Y         | 0.00                | 0.39 | 1.16 |

|     | Gene names         | Protein names                                                                                      | Confidence | Conserved | Log <sub>2</sub> QS |       |      |
|-----|--------------------|----------------------------------------------------------------------------------------------------|------------|-----------|---------------------|-------|------|
|     |                    |                                                                                                    |            |           | Sulforaphane (μM)   |       |      |
|     |                    |                                                                                                    |            |           | 5                   | 25    | 100  |
| 222 | <b>OTUB1</b>       | Ubiquitin thioesterase OTUB1                                                                       | Medium     | N         | -0.03               | 0.39  | 1.37 |
| 223 | <b>OTUD6B</b>      | OTU domain-containing protein 6B                                                                   | Medium     | Y         | -0.11               | 0.43  | 1.47 |
| 224 | <b>PAFAH1B2</b>    | Platelet-activating factor acetylhydrolase IB subunit beta                                         | Medium     | N         | 0.02                | 0.40  | 0.78 |
| 225 | <b>PCBP1</b>       | Poly(rC)-binding protein 1                                                                         | Medium     | Y         | -0.02               | 0.53  | 1.57 |
| 226 | <b>PCBP2</b>       | Poly(rC)-binding protein 2                                                                         | Medium     | Y         | 0.11                | 0.56  | 1.11 |
| 227 | <b>PCMT1</b>       | Protein-L-isoaspartate(D-aspartate) O-methyltransferase;Protein-L-isoaspartate O-methyltransferase | Medium     | Y         | 0.02                | 0.54  | 1.54 |
| 228 | <b>PDCD6IP</b>     | Programmed cell death 6-interacting protein                                                        | Medium     | Y         | -0.09               | 0.23  | 0.86 |
| 229 | <b>PDE12</b>       | 2,5-phosphodiesterase 12                                                                           | Medium     | Y         | 0.49                | 0.74  | 1.48 |
| 230 | <b>PGAM5</b>       | Serine/threonine-protein phosphatase PGAM5, mitochondrial                                          | Medium     | N         | 0.21                | 0.69  | 1.10 |
| 231 | <b>PGP</b>         | Phosphoglycolate phosphatase                                                                       | Medium     | N         | -0.06               | 0.17  | 0.74 |
| 232 | <b>PGPEP1</b>      | Pyroglutamyl-peptidase 1                                                                           | Medium     | Y         | -0.09               | 0.42  | 1.48 |
| 233 | <b>PML</b>         | Protein PML                                                                                        | Medium     | Y         | 0.24                | 0.67  | 0.75 |
| 234 | <b>PMPCB</b>       | Mitochondrial-processing peptidase subunit beta                                                    | Medium     | N         | 0.20                | 0.65  | 1.07 |
| 235 | <b>POP1</b>        | Ribonucleases P/MRP protein subunit POP1                                                           | Medium     | N         | 0.30                | -0.03 | 1.40 |
| 236 | <b>PPME1</b>       | Protein phosphatase methylesterase 1                                                               | Medium     | Y         | -0.07               | 0.22  | 0.63 |
| 237 | <b>PPP1R3D</b>     | Protein phosphatase 1 regulatory subunit 3D                                                        | Medium     | N         | 0.15                | 0.79  | NaN  |
| 238 | <b>PPP2R2A</b>     | Serine/threonine-protein phosphatase 2A 55 kDa regulatory subunit B alpha isoform                  | Medium     | Y         | -0.01               | 0.75  | 1.63 |
| 239 | <b>PPP6R3</b>      | Serine/threonine-protein phosphatase 6 regulatory subunit 3                                        | Medium     | Y         | -0.11               | 0.22  | 0.76 |
| 240 | <b>PREX1</b>       | Phosphatidylinositol 3,4,5-trisphosphate-dependent Rac exchanger 1 protein                         | Medium     | N         | 0.04                | 0.63  | 1.45 |
| 241 | <b>PRKDC</b>       | DNA-dependent protein kinase catalytic subunit                                                     | Medium     | Y         | -0.13               | 0.56  | 1.11 |
| 242 | <b>PRMT1</b>       | Protein arginine N-methyltransferase 1                                                             | Medium     | Y         | 0.01                | 0.47  | 1.22 |
| 243 | <b>PROSC</b>       | Proline synthase co-transcribed bacterial homolog protein                                          | Medium     | N         | 0.26                | 1.26  | NaN  |
| 244 | <b>PRRC2C</b>      | Protein PRRC2C                                                                                     | Medium     | Y         | -0.06               | 0.31  | 0.91 |
| 245 | <b>PSME1</b>       | Proteasome activator complex subunit 1                                                             | Medium     | N         | 0.04                | 0.36  | 0.73 |
| 246 | <b>PSMG1</b>       | Proteasome assembly chaperone 1                                                                    | Medium     | N         | 0.03                | 0.38  | 1.02 |
| 247 | <b>PYGB</b>        | Glycogen phosphorylase, brain form                                                                 | Medium     | Y         | -0.07               | 0.36  | 0.73 |
| 248 | <b>QARS</b>        | Glutamine--tRNA ligase                                                                             | Medium     | Y         | -0.10               | 0.23  | 0.90 |
| 249 | <b>RABL6</b>       | Rab-like protein 6                                                                                 | Medium     | N         | -0.07               | 0.54  | 1.09 |
| 250 | <b>RARS</b>        | Arginine--tRNA ligase, cytoplasmic                                                                 | Medium     | Y         | -0.10               | 0.33  | 0.96 |
| 251 | <b>RBBP7;RBBP4</b> | Histone-binding protein RBBP7;Histone-binding protein RBBP4                                        | Medium     | N         | 0.04                | 0.34  | 0.81 |
| 252 | <b>RCC2</b>        | Protein RCC2                                                                                       | Medium     | Y         | 0.09                | 0.47  | 0.96 |
| 253 | <b>RNF14</b>       | E3 ubiquitin-protein ligase RNF14                                                                  | Medium     | N         | 0.04                | 0.67  | NaN  |
| 254 | <b>RPN1</b>        | Dolichyl-diphosphooligosaccharide--protein glycosyltransferase subunit 1                           | Medium     | N         | 0.02                | 0.52  | 1.02 |
| 255 | <b>RPS6KB1</b>     | Ribosomal protein S6 kinase beta-1                                                                 | Medium     | N         | 0.00                | 0.14  | 0.70 |
| 256 | <b>RRBP1</b>       | Ribosome-binding protein 1                                                                         | Medium     | Y         | 0.05                | 0.46  | 1.00 |
| 257 | <b>RRM1</b>        | Ribonucleoside-diphosphate reductase large subunit                                                 | Medium     | Y         | -0.09               | 0.36  | 1.26 |
| 258 | <b>SCCPDH</b>      | Saccharopine dehydrogenase-like oxidoreductase                                                     | Medium     | Y         | 0.10                | 1.28  | NaN  |
| 259 | <b>SEC16A</b>      | Protein transport protein Sec16A                                                                   | Medium     | Y         | 0.00                | 0.36  | 1.03 |
| 260 | <b>SEC24C</b>      | Protein transport protein Sec24C                                                                   | Medium     | Y         | 0.00                | 0.49  | 1.33 |
| 261 | <b>SLC5A6</b>      | Sodium-dependent multivitamin transporter                                                          | Medium     | N         | 0.05                | 0.57  | 0.91 |

|     | Gene names                  | Protein names                                                                  | Confidence | Conserved | Log <sub>2</sub> QS |      |      |
|-----|-----------------------------|--------------------------------------------------------------------------------|------------|-----------|---------------------|------|------|
|     |                             |                                                                                |            |           | Sulforaphane (μM)   |      |      |
|     |                             |                                                                                |            |           | 5                   | 25   | 100  |
| 262 | <b>SMC2</b>                 | Structural maintenance of chromosomes protein 2                                | Medium     | Y         | -0.14               | 0.64 | 1.62 |
| 263 | <b>SPCS2</b>                | Signal peptidase complex subunit 2                                             | Medium     | N         | 0.18                | 0.91 | 1.47 |
| 264 | <b>SPTLC2</b>               | Serine palmitoyltransferase 2                                                  | Medium     | Y         | -0.02               | 0.46 | 1.21 |
| 265 | <b>SYNCRIP</b>              | Heterogeneous nuclear ribonucleoprotein Q                                      | Medium     | N         | -0.09               | 0.38 | 0.95 |
| 266 | <b>TACC3</b>                | Transforming acidic coiled-coil-containing protein 3                           | Medium     | Y         | -0.23               | 0.19 | 1.00 |
| 267 | <b>TAGLN2</b>               | Transgelin-2                                                                   | Medium     | Y         | 0.03                | 0.40 | 0.89 |
| 268 | <b>TBC1D30</b>              | TBC1 domain family member 30                                                   | Medium     | N         | 0.46                | 0.79 | 1.59 |
| 269 | <b>TBC1D9B</b>              | TBC1 domain family member 9B                                                   | Medium     | N         | 0.01                | 0.94 | NaN  |
| 270 | <b>TBCD</b>                 | Tubulin-specific chaperone D                                                   | Medium     | Y         | 0.09                | 0.38 | 0.97 |
| 271 | <b>TBL2</b>                 | Transducin beta-like protein 2                                                 | Medium     | N         | 0.15                | 0.54 | 1.24 |
| 272 | <b>THUMP1</b>               | THUMP domain-containing protein 1                                              | Medium     | N         | 0.11                | 0.85 | 1.38 |
| 273 | <b>TPM3;DK FZp686J1 372</b> | Tropomyosin alpha-3 chain                                                      | Medium     | Y         | -0.03               | 0.29 | 1.11 |
| 274 | <b>TRIM25</b>               | E3 ubiquitin/ISG15 ligase TRIM25                                               | Medium     | Y         | -0.03               | 0.46 | 1.07 |
| 275 | <b>TRIP6</b>                | Thyroid receptor-interacting protein 6                                         | Medium     | N         | -0.05               | 0.34 | 1.46 |
| 276 | <b>TTLL12</b>               | Tubulin--tyrosine ligase-like protein 12                                       | Medium     | N         | -0.01               | 0.24 | 0.82 |
| 277 | <b>TXN</b>                  | Thioredoxin                                                                    | Medium     | N         | -0.02               | 0.05 | 0.74 |
| 278 | <b>TXNRD1</b>               | Thioredoxin reductase 1, cytoplasmic                                           | Medium     | Y         | -0.93               | 0.05 | 0.43 |
| 279 | <b>UBA6</b>                 | Ubiquitin-like modifier-activating enzyme 6                                    | Medium     | Y         | -0.14               | 0.25 | 0.85 |
| 280 | <b>UBE2O</b>                | Ubiquitin-conjugating enzyme E2 O                                              | Medium     | Y         | -0.17               | 0.28 | 0.78 |
| 281 | <b>UBR4</b>                 | E3 ubiquitin-protein ligase UBR4                                               | Medium     | N         | 0.37                | 0.66 | NaN  |
| 282 | <b>USP15</b>                | Ubiquitin carboxyl-terminal hydrolase 15                                       | Medium     | N         | -0.30               | 0.16 | 0.89 |
| 283 | <b>USP32</b>                | Ubiquitin carboxyl-terminal hydrolase 32;Ubiquitin carboxyl-terminal hydrolase | Medium     | N         | 0.13                | 0.63 | 1.29 |
| 284 | <b>USP47</b>                | Ubiquitin carboxyl-terminal hydrolase 47                                       | Medium     | N         | 0.23                | 0.73 | 1.26 |
| 285 | <b>USP5</b>                 | Ubiquitin carboxyl-terminal hydrolase 5                                        | Medium     | Y         | -0.03               | 0.30 | 0.87 |
| 286 | <b>USP9X</b>                | Probable ubiquitin carboxyl-terminal hydrolase FAF-X                           | Medium     | N         | 0.05                | 0.26 | 0.93 |
| 287 | <b>VCPIP1</b>               | Deubiquitinating protein VCIP135                                               | Medium     | Y         | -0.10               | 0.29 | 0.85 |
| 288 | <b>VDAC1</b>                | Voltage-dependent anion-selective channel protein 1                            | Medium     | N         | 0.17                | 1.06 | NaN  |
| 289 | <b>ZNF217</b>               | Zinc finger protein 217                                                        | Medium     | N         | 0.00                | 0.58 | 1.46 |

## 2.4 Supporting Table S4. High- and medium- confidence targets of sulforaphane in the MDA-MB-231 cell line

|   | Gene names     | Protein names                                                         | Confidence | Conserved | Log <sub>2</sub> QS |      |      |
|---|----------------|-----------------------------------------------------------------------|------------|-----------|---------------------|------|------|
|   |                |                                                                       |            |           | Sulforaphane (μM)   |      |      |
|   |                |                                                                       |            |           | 5                   | 25   | 100  |
| 1 | <b>ACO1</b>    | Cytoplasmic aconitate hydratase                                       | High       | N         | 0.04                | 0.68 | 1.73 |
| 2 | <b>AIMP2</b>   | Aminoacyl tRNA synthase complex-interacting multifunctional protein 2 | High       | Y         | 0.06                | 0.91 | 1.40 |
| 3 | <b>AIP</b>     | AH receptor-interacting protein;Peptidyl-prolyl cis-trans isomerase   | High       | Y         | 0.18                | 1.10 | 1.67 |
| 4 | <b>AKAP1</b>   | A-kinase anchor protein 1, mitochondrial                              | High       | Y         | -0.03               | 0.71 | 1.64 |
| 5 | <b>AKAP8L</b>  | A-kinase anchor protein 8-like                                        | High       | N         | 0.17                | 1.24 | 1.75 |
| 6 | <b>ALDH2</b>   | Aldehyde dehydrogenase, mitochondrial                                 | High       | N         | 1.43                | 2.72 | 3.62 |
| 7 | <b>ALDH9A1</b> | 4-trimethylaminobutyraldehyde dehydrogenase                           | High       | Y         | 0.62                | 1.83 | 2.84 |

|    | Gene names            | Protein names                                                                                                                       | Confidence | Conserved | Log <sub>2</sub> QS |      |      |
|----|-----------------------|-------------------------------------------------------------------------------------------------------------------------------------|------------|-----------|---------------------|------|------|
|    |                       |                                                                                                                                     |            |           | Sulforaphane (μM)   |      |      |
|    |                       |                                                                                                                                     |            |           | 5                   | 25   | 100  |
| 8  | <b>ANLN</b>           | Actin-binding protein anillin                                                                                                       | High       | N         | -0.02               | 0.90 | 2.22 |
| 9  | <b>APOBEC 3C</b>      | DNA dC->dU-editing enzyme APOBEC-3C                                                                                                 | High       | N         | 1.51                | 4.30 | 5.13 |
| 10 | <b>ARHGAP 29</b>      | Rho GTPase-activating protein 29                                                                                                    | High       | N         | 0.05                | 0.81 | 2.13 |
| 11 | <b>ARL1</b>           | ADP-ribosylation factor-like protein 1                                                                                              | High       | N         | 0.11                | 0.74 | 1.44 |
| 12 | <b>ATP6V1A</b>        | V-type proton ATPase catalytic subunit A                                                                                            | High       | Y         | 0.23                | 1.22 | 2.21 |
| 13 | <b>BOD1L1</b>         | Biorientation of chromosomes in cell division protein 1-like 1                                                                      | High       | N         | -0.13               | 0.88 | 2.00 |
| 14 | <b>CAPZB</b>          | F-actin-capping protein subunit beta                                                                                                | High       | Y         | 0.00                | 0.83 | 1.50 |
| 15 | <b>CARM1</b>          | Histone-arginine methyltransferase CARM1                                                                                            | High       | Y         | 0.14                | 0.79 | 2.52 |
| 16 | <b>CARS</b>           | Cysteine--tRNA ligase, cytoplasmic                                                                                                  | High       | Y         | 0.14                | 1.01 | 1.72 |
| 17 | <b>CAST</b>           | Calpastatin                                                                                                                         | High       | N         | -0.31               | 0.73 | 1.74 |
| 18 | <b>CDK3;CD K2</b>     | Cyclin-dependent kinase 3                                                                                                           | High       | N         | 0.22                | 1.21 | 1.95 |
| 19 | <b>CDKN2AI P</b>      | CDKN2A-interacting protein                                                                                                          | High       | N         | -0.07               | 0.88 | 1.50 |
| 20 | <b>CPPED1</b>         | Calcineurin-like phosphoesterase domain-containing protein 1                                                                        | High       | Y         | 0.88                | 2.65 | 3.08 |
| 21 | <b>CPSF3</b>          | Cleavage and polyadenylation specificity factor subunit 3                                                                           | High       | N         | -0.04               | 0.96 | 1.38 |
| 22 | <b>CPT1A</b>          | Carnitine O-palmitoyltransferase 1, liver isoform                                                                                   | High       | Y         | -0.02               | 0.65 | 1.30 |
| 23 | <b>CTSZ</b>           | Cathepsin Z                                                                                                                         | High       | N         | -0.32               | 0.78 | 2.18 |
| 24 | <b>DEGS1</b>          | Sphingolipid delta(4)-desaturase DES1                                                                                               | High       | N         | 0.43                | 1.72 | 2.61 |
| 25 | <b>DFFA</b>           | DNA fragmentation factor subunit alpha                                                                                              | High       | Y         | 0.14                | 1.09 | 2.25 |
| 26 | <b>DFNA5</b>          | Non-syndromic hearing impairment protein 5                                                                                          | High       | N         | 0.23                | 1.59 | 3.05 |
| 27 | <b>DLAT</b>           | Dihydrolipoyllysine-residue acetyltransferase component of pyruvate dehydrogenase complex, mitochondrial                            | High       | N         | 0.21                | 0.93 | 1.73 |
| 28 | <b>DLGAP5</b>         | Disks large-associated protein 5                                                                                                    | High       | N         | 0.04                | 0.99 | 2.08 |
| 29 | <b>DNMBP</b>          | Dynamin-binding protein                                                                                                             | High       | N         | -0.07               | 0.84 | 1.87 |
| 30 | <b>DYNC1LI 1</b>      | Cytoplasmic dynein 1 light intermediate chain 1                                                                                     | High       | N         | -0.13               | 0.98 | 1.26 |
| 31 | <b>DYNLL1; DYNLL2</b> | Dynein light chain 1, cytoplasmic;Dynein light chain 2, cytoplasmic                                                                 | High       | Y         | -0.01               | 0.67 | 1.66 |
| 32 | <b>EEA1</b>           | Early endosome antigen 1                                                                                                            | High       | Y         | 0.45                | 1.51 | 1.95 |
| 33 | <b>EGFR</b>           | Epidermal growth factor receptor                                                                                                    | High       | N         | -0.01               | 0.68 | 1.56 |
| 34 | <b>EIF6</b>           | Eukaryotic translation initiation factor 6                                                                                          | High       | N         | -0.10               | 0.81 | 1.87 |
| 35 | <b>ESYT1</b>          | Extended synaptotagmin-1                                                                                                            | High       | Y         | -0.01               | 0.67 | 1.36 |
| 36 | <b>EXOSC6</b>         | Exosome complex component MTR3                                                                                                      | High       | Y         | 0.11                | 0.92 | 2.36 |
| 37 | <b>FAM120A</b>        | Constitutive coactivator of PPAR-gamma-like protein 1                                                                               | High       | Y         | -0.01               | 0.91 | 1.82 |
| 38 | <b>FAM203A</b>        | Protein FAM203A                                                                                                                     | High       | Y         | 0.31                | 1.55 | 2.74 |
| 39 | <b>FNDC3B</b>         | Fibronectin type III domain-containing protein 3B                                                                                   | High       | N         | -0.04               | 0.80 | 1.60 |
| 40 | <b>FXR1</b>           | Fragile X mental retardation syndrome-related protein 1                                                                             | High       | Y         | 0.05                | 1.00 | 2.45 |
| 41 | <b>FXR2</b>           | Fragile X mental retardation syndrome-related protein 2                                                                             | High       | Y         | 0.07                | 0.94 | 2.74 |
| 42 | <b>GOLGA2</b>         | Golgin subfamily A member 2                                                                                                         | High       | Y         | 0.09                | 0.82 | 1.96 |
| 43 | <b>GSDMD</b>          | Gasdermin-D                                                                                                                         | High       | N         | 0.26                | 1.37 | 2.90 |
| 44 | <b>GSPT1;G SPT2</b>   | Eukaryotic peptide chain release factor GTP-binding subunit ERF3A;Eukaryotic peptide chain release factor GTP-binding subunit ERF3B | High       | N         | 0.06                | 0.75 | 1.47 |
| 45 | <b>HAT1</b>           | Histone acetyltransferase type B catalytic subunit                                                                                  | High       | Y         | -0.02               | 0.96 | 1.99 |
| 46 | <b>HCCS</b>           | Cytochrome c-type heme lyase                                                                                                        | High       | Y         | 0.15                | 1.05 | 2.00 |
| 47 | <b>HCFC1</b>          | Host cell factor 1;HCF N-terminal chain 1;HCF N-terminal                                                                            | High       | Y         | -0.15               | 0.87 | 1.98 |

|    | Gene names         | Protein names                                                                                                                                                                                                                                 | Confidence | Conserved | Log <sub>2</sub> QS |      |      |
|----|--------------------|-----------------------------------------------------------------------------------------------------------------------------------------------------------------------------------------------------------------------------------------------|------------|-----------|---------------------|------|------|
|    |                    |                                                                                                                                                                                                                                               |            |           | Sulforaphane (μM)   |      |      |
|    |                    |                                                                                                                                                                                                                                               |            |           | 5                   | 25   | 100  |
|    |                    | chain 2;HCF N-terminal chain 3;HCF N-terminal chain 4;HCF N-terminal chain 5;HCF N-terminal chain 6;HCF C-terminal chain 1;HCF C-terminal chain 2;HCF C-terminal chain 3;HCF C-terminal chain 4;HCF C-terminal chain 5;HCF C-terminal chain 6 |            |           |                     |      |      |
| 48 | <b>HMOX2</b>       | Heme oxygenase 2                                                                                                                                                                                                                              | High       | Y         | 0.36                | 1.02 | 2.04 |
| 49 | <b>KEAP1</b>       | Kelch-like ECH-associated protein 1                                                                                                                                                                                                           | High       | Y         | 2.41                | 3.85 | 5.88 |
| 50 | <b>KIAA1524</b>    | Protein CIP2A                                                                                                                                                                                                                                 | High       | N         | 0.13                | 0.89 | 1.85 |
| 51 | <b>KIF2C</b>       | Kinesin-like protein KIF2C                                                                                                                                                                                                                    | High       | N         | 0.08                | 1.09 | 2.01 |
| 52 | <b>KLC1</b>        | Kinesin light chain 1                                                                                                                                                                                                                         | High       | Y         | 0.14                | 0.77 | 1.63 |
| 53 | <b>LUZP1</b>       | Leucine zipper protein 1                                                                                                                                                                                                                      | High       | N         | 0.12                | 1.10 | 2.40 |
| 54 | <b>MAP7D3</b>      | MAP7 domain-containing protein 3                                                                                                                                                                                                              | High       | N         | 0.14                | 0.63 | 1.61 |
| 55 | <b>MCMBP</b>       | Mini-chromosome maintenance complex-binding protein                                                                                                                                                                                           | High       | Y         | -0.01               | 0.87 | 2.33 |
| 56 | <b>MIF</b>         | Macrophage migration inhibitory factor                                                                                                                                                                                                        | High       | Y         | 2.57                | 2.82 | 2.64 |
| 57 | <b>MKI67</b>       | Antigen KI-67                                                                                                                                                                                                                                 | High       | N         | 0.02                | 0.79 | 2.47 |
| 58 | <b>MMS19</b>       | MMS19 nucleotide excision repair protein homolog                                                                                                                                                                                              | High       | Y         | 0.07                | 0.79 | 1.85 |
| 59 | <b>MRPL39</b>      | 39S ribosomal protein L39, mitochondrial                                                                                                                                                                                                      | High       | Y         | 0.17                | 1.05 | 2.22 |
| 60 | <b>MTCH2</b>       | Mitochondrial carrier homolog 2                                                                                                                                                                                                               | High       | Y         | 0.17                | 1.04 | 1.63 |
| 61 | <b>MTHFD1L</b>     | Monofunctional C1-tetrahydrofolate synthase, mitochondrial                                                                                                                                                                                    | High       | Y         | 0.13                | 1.00 | 1.62 |
| 62 | <b>NADK2</b>       | NAD kinase 2, mitochondrial                                                                                                                                                                                                                   | High       | Y         | 0.49                | 1.16 | 1.57 |
| 63 | <b>NCAPD2</b>      | Condensin complex subunit 1                                                                                                                                                                                                                   | High       | Y         | 0.18                | 1.14 | 2.20 |
| 64 | <b>NCAPH</b>       | Condensin complex subunit 2                                                                                                                                                                                                                   | High       | Y         | 0.12                | 0.81 | 2.02 |
| 65 | <b>NDUFS3</b>      | NADH dehydrogenase [ubiquinone] iron-sulfur protein 3, mitochondrial                                                                                                                                                                          | High       | N         | 0.23                | 0.92 | 2.03 |
| 66 | <b>NFKB2</b>       | Nuclear factor NF-kappa-B p100 subunit;Nuclear factor NF-kappa-B p52 subunit                                                                                                                                                                  | High       | Y         | 0.47                | 1.49 | 2.17 |
| 67 | <b>NR2F2;NR2F1</b> | COUP transcription factor 2;COUP transcription factor 1                                                                                                                                                                                       | High       | Y         | -0.14               | 0.84 | 1.66 |
| 68 | <b>NR3C1</b>       | Glucocorticoid receptor                                                                                                                                                                                                                       | High       | N         | -0.05               | 0.94 | 1.97 |
| 69 | <b>NUP54</b>       | Nucleoporin p54                                                                                                                                                                                                                               | High       | Y         | 0.20                | 0.99 | 2.20 |
| 70 | <b>OGFR</b>        | Opioid growth factor receptor                                                                                                                                                                                                                 | High       | Y         | 0.01                | 1.01 | 2.19 |
| 71 | <b>OGT</b>         | UDP-N-acetylglucosamine--peptide N-acetylglucosaminyltransferase 110 kDa subunit                                                                                                                                                              | High       | N         | 0.42                | 0.99 | 1.39 |
| 72 | <b>OSBPL3</b>      | Oxysterol-binding protein-related protein 3                                                                                                                                                                                                   | High       | N         | -0.33               | 0.64 | 1.05 |
| 73 | <b>PALLD</b>       | Palladin                                                                                                                                                                                                                                      | High       | N         | 0.44                | 1.39 | 1.14 |
| 74 | <b>PGLS</b>        | 6-phosphogluconolactonase                                                                                                                                                                                                                     | High       | Y         | 0.11                | 0.98 | 1.90 |
| 75 | <b>PHF3</b>        | PHD finger protein 3                                                                                                                                                                                                                          | High       | N         | -0.12               | 0.82 | 2.11 |
| 76 | <b>PLCG1</b>       | 1-phosphatidylinositol 4,5-bisphosphate phosphodiesterase gamma-1                                                                                                                                                                             | High       | Y         | 0.00                | 0.96 | 1.92 |
| 77 | <b>PLIN3</b>       | Perilipin-3                                                                                                                                                                                                                                   | High       | Y         | -0.04               | 0.78 | 2.05 |
| 78 | <b>PML</b>         | Protein PML                                                                                                                                                                                                                                   | High       | Y         | 0.07                | 1.26 | 2.48 |
| 79 | <b>PNPLA6</b>      | Neuropathy target esterase                                                                                                                                                                                                                    | High       | N         | 0.01                | 0.68 | 0.94 |
| 80 | <b>POLRMT</b>      | DNA-directed RNA polymerase, mitochondrial                                                                                                                                                                                                    | High       | N         | 0.44                | 1.55 | 2.60 |
| 81 | <b>PPP2R2A</b>     | Serine/threonine-protein phosphatase 2A 55 kDa regulatory subunit B alpha isoform                                                                                                                                                             | High       | Y         | 0.29                | 1.21 | 2.32 |
| 82 | <b>PREP</b>        | Prolyl endopeptidase                                                                                                                                                                                                                          | High       | Y         | 0.04                | 0.75 | 1.93 |
| 83 | <b>PSMD9</b>       | 26S proteasome non-ATPase regulatory subunit 9                                                                                                                                                                                                | High       | Y         | 0.11                | 0.97 | 2.08 |
| 84 | <b>PSME2</b>       | Proteasome activator complex subunit 2                                                                                                                                                                                                        | High       | Y         | 0.13                | 0.96 | 1.80 |
| 85 | <b>PTPN1</b>       | Tyrosine-protein phosphatase non-receptor type 1;Tyrosine-protein phosphatase non-receptor type                                                                                                                                               | High       | Y         | 0.14                | 0.90 | 1.51 |

|     | Gene names      | Protein names                                                                                                                     | Confidence | Conserved | Log <sub>2</sub> QS |      |      |
|-----|-----------------|-----------------------------------------------------------------------------------------------------------------------------------|------------|-----------|---------------------|------|------|
|     |                 |                                                                                                                                   |            |           | Sulforaphane (μM)   |      |      |
|     |                 |                                                                                                                                   |            |           | 5                   | 25   | 100  |
| 86  | <b>PTPN11</b>   | Tyrosine-protein phosphatase non-receptor type 11                                                                                 | High       | Y         | 0.15                | 0.87 | 1.83 |
| 87  | <b>PXN</b>      | Paxillin                                                                                                                          | High       | Y         | 0.08                | 0.75 | 1.83 |
| 88  | <b>RELA</b>     | Transcription factor p65                                                                                                          | High       | Y         | 0.15                | 1.29 | 1.82 |
| 89  | <b>RFTN1</b>    | Raftlin                                                                                                                           | High       | N         | 0.08                | 0.70 | 2.01 |
| 90  | <b>RNPEP</b>    | Aminopeptidase B                                                                                                                  | High       | Y         | 0.33                | 1.15 | 1.69 |
| 91  | <b>ROCK1</b>    | Rho-associated protein kinase 1                                                                                                   | High       | N         | 0.37                | 0.90 | 1.88 |
| 92  | <b>RPS6KA1</b>  | Ribosomal protein S6 kinase alpha-1;Ribosomal protein S6 kinase                                                                   | High       | Y         | 0.13                | 0.72 | 1.78 |
| 93  | <b>RPS6KA3</b>  | Ribosomal protein S6 kinase alpha-3                                                                                               | High       | Y         | 0.03                | 0.80 | 2.33 |
| 94  | <b>RRM1</b>     | Ribonucleoside-diphosphate reductase large subunit                                                                                | High       | Y         | 0.17                | 0.65 | 1.69 |
| 95  | <b>RTN1</b>     | Reticulon-1                                                                                                                       | High       | N         | 0.19                | 0.96 | 1.58 |
| 96  | <b>RTN3</b>     | Reticulon-3                                                                                                                       | High       | Y         | -0.07               | 1.13 | 1.86 |
| 97  | <b>RUFY1</b>    | RUN and FYVE domain-containing protein 1                                                                                          | High       | Y         | -0.01               | 0.93 | 1.95 |
| 98  | <b>SCCPDH</b>   | Saccharopine dehydrogenase-like oxidoreductase                                                                                    | High       | Y         | 0.08                | 1.38 | 2.26 |
| 99  | <b>SEC16A</b>   | Protein transport protein Sec16A                                                                                                  | High       | Y         | -0.23               | 0.74 | 1.94 |
| 100 | <b>SEC63</b>    | Translocation protein SEC63 homolog                                                                                               | High       | Y         | 0.23                | 0.93 | 2.04 |
| 101 | <b>SERPINB1</b> | Leukocyte elastase inhibitor                                                                                                      | High       | N         | -0.13               | 0.72 | 1.71 |
| 102 | <b>SOGA2</b>    | Protein SOGA2                                                                                                                     | High       | N         | -0.12               | 0.72 | 1.97 |
| 103 | <b>SPATS2L</b>  | SPATS2-like protein                                                                                                               | High       | N         | 0.02                | 0.90 | 1.98 |
| 104 | <b>SPG20</b>    | Spartin                                                                                                                           | High       | N         | -0.18               | 0.70 | 1.89 |
| 105 | <b>STAT3</b>    | Signal transducer and activator of transcription 3                                                                                | High       | Y         | 0.05                | 0.90 | 1.86 |
| 106 | <b>STK3</b>     | Serine/threonine-protein kinase 3;Serine/threonine-protein kinase 3 36kDa subunit;Serine/threonine-protein kinase 3 20kDa subunit | High       | Y         | 0.35                | 2.01 | 2.97 |
| 107 | <b>STK4</b>     | Serine/threonine-protein kinase 4;Serine/threonine-protein kinase 4 37kDa subunit;Serine/threonine-protein kinase 4 18kDa subunit | High       | Y         | 0.38                | 2.15 | 3.71 |
| 108 | <b>SUGT1</b>    | Suppressor of G2 allele of SKP1 homolog                                                                                           | High       | Y         | 0.29                | 1.16 | 2.50 |
| 109 | <b>TACC1</b>    | Transforming acidic coiled-coil-containing protein 1                                                                              | High       | N         | -0.11               | 0.66 | 1.75 |
| 110 | <b>TBC1D13</b>  | TBC1 domain family member 13                                                                                                      | High       | N         | 0.10                | 0.95 | 1.77 |
| 111 | <b>TBC1D4</b>   | TBC1 domain family member 4                                                                                                       | High       | N         | 0.00                | 0.61 | 1.84 |
| 112 | <b>THNSL1</b>   | Threonine synthase-like 1                                                                                                         | High       | Y         | 0.19                | 1.01 | 1.75 |
| 113 | <b>TMPO</b>     | Lamina-associated polypeptide 2, isoform alpha;Thymopietin;Thymopentin                                                            | High       | Y         | 0.00                | 0.96 | 1.87 |
| 114 | <b>TNKS1BP1</b> | 182 kDa tankyrase-1-binding protein                                                                                               | High       | Y         | -0.11               | 0.75 | 1.81 |
| 115 | <b>TNS3</b>     | Tensin-3                                                                                                                          | High       | N         | 0.18                | 1.50 | 2.35 |
| 116 | <b>TPX2</b>     | Targeting protein for Xklp2                                                                                                       | High       | N         | -0.08               | 0.70 | 2.17 |
| 117 | <b>USP10</b>    | Ubiquitin carboxyl-terminal hydrolase 10                                                                                          | High       | Y         | 0.33                | 1.21 | 2.14 |
| 118 | <b>VDAC2</b>    | Voltage-dependent anion-selective channel protein 2                                                                               | High       | Y         | -0.14               | 0.85 | 1.76 |
| 119 | <b>VDAC3</b>    | Voltage-dependent anion-selective channel protein 3                                                                               | High       | Y         | 0.00                | 1.17 | 2.34 |
| 120 | <b>YAP1</b>     | Yorkie homolog                                                                                                                    | High       | N         | 0.19                | 0.84 | 1.64 |
| 121 | <b>ZNF185</b>   | Zinc finger protein 185                                                                                                           | High       | N         | -0.18               | 0.75 | 2.27 |
| 122 | <b>AARS</b>     | Alanine--tRNA ligase, cytoplasmic                                                                                                 | Medium     | N         | 0.08                | 0.46 | 1.14 |
| 123 | <b>ABCB7</b>    | ATP-binding cassette sub-family B member 7, mitochondrial                                                                         | Medium     | N         | -0.17               | 0.43 | 0.86 |
| 124 | <b>ABCF1</b>    | ATP-binding cassette sub-family F member 1                                                                                        | Medium     | N         | NaN                 | 1.14 | NaN  |
| 125 | <b>ACAD9</b>    | Acyl-CoA dehydrogenase family member 9, mitochondrial                                                                             | Medium     | Y         | 0.19                | 0.56 | 1.45 |

|     | Gene names            | Protein names                                                                                              | Confidence | Conserved | Log <sub>2</sub> QS |      |      |
|-----|-----------------------|------------------------------------------------------------------------------------------------------------|------------|-----------|---------------------|------|------|
|     |                       |                                                                                                            |            |           | Sulforaphane (μM)   |      |      |
|     |                       |                                                                                                            |            |           | 5                   | 25   | 100  |
| 126 | <b>ACIN1</b>          | Apoptotic chromatin condensation inducer in the nucleus                                                    | Medium     | N         | 0.21                | 1.36 | 1.37 |
| 127 | <b>ACLY</b>           | ATP-citrate synthase                                                                                       | Medium     | N         | -0.20               | 0.40 | 1.26 |
| 128 | <b>ACOT9</b>          | Acyl-coenzyme A thioesterase 9, mitochondrial                                                              | Medium     | N         | 0.00                | 0.28 | 0.71 |
| 129 | <b>ACSL3</b>          | Long-chain-fatty-acid--CoA ligase 3                                                                        | Medium     | N         | -0.03               | 0.63 | 1.43 |
| 130 | <b>ADAR</b>           | Double-stranded RNA-specific adenosine deaminase                                                           | Medium     | Y         | 0.11                | 0.43 | 1.10 |
| 131 | <b>ADRM1</b>          | Proteasomal ubiquitin receptor ADRM1                                                                       | Medium     | Y         | -0.17               | 0.73 | 1.27 |
| 132 | <b>ADSS</b>           | Adenylosuccinate synthetase isozyme 2                                                                      | Medium     | N         | 0.15                | 0.59 | 1.32 |
| 133 | <b>AFAP1</b>          | Actin filament-associated protein 1                                                                        | Medium     | N         | 0.21                | 0.73 | 1.60 |
| 134 | <b>AGPAT9</b>         | Glycerol-3-phosphate acyltransferase 3                                                                     | Medium     | N         | 0.05                | 1.11 | NaN  |
| 135 | <b>AHCY</b>           | Adenosylhomocysteinase                                                                                     | Medium     | Y         | 0.44                | 0.90 | 1.58 |
| 136 | <b>AJUBA</b>          | LIM domain-containing protein ajuba                                                                        | Medium     | N         | 0.02                | 0.38 | 1.11 |
| 137 | <b>AKAP11</b>         | A-kinase anchor protein 11                                                                                 | Medium     | N         | 0.05                | 1.15 | NaN  |
| 138 | <b>AKAP13</b>         | A-kinase anchor protein 13                                                                                 | Medium     | N         | 0.01                | 0.87 | NaN  |
| 139 | <b>AKAP2</b>          | A-kinase anchor protein 2                                                                                  | Medium     | N         | -0.16               | 0.85 | 1.07 |
| 140 | <b>AKAP8</b>          | A-kinase anchor protein 8                                                                                  | Medium     | N         | -0.22               | 0.61 | 1.82 |
| 141 | <b>AMPD2</b>          | AMP deaminase 2                                                                                            | Medium     | N         | -0.32               | 0.69 | 1.37 |
| 142 | <b>ANAPC7</b>         | Anaphase-promoting complex subunit 7                                                                       | Medium     | N         | 0.18                | 1.11 | 2.38 |
| 143 | <b>AP2A1</b>          | AP-2 complex subunit alpha-1                                                                               | Medium     | N         | 0.03                | 1.11 | 0.70 |
| 144 | <b>ARAP1</b>          | Arf-GAP with Rho-GAP domain, ANK repeat and PH domain-containing protein 1                                 | Medium     | N         | -0.55               | 0.30 | 1.19 |
| 145 | <b>ARHGEF28</b>       | Rho guanine nucleotide exchange factor 28                                                                  | Medium     | N         | 0.16                | 0.66 | 0.78 |
| 146 | <b>ARMCX2</b>         | Armadillo repeat-containing X-linked protein 2                                                             | Medium     | N         | 0.32                | 1.88 | 2.54 |
| 147 | <b>ASNS</b>           | Asparagine synthetase [glutamine-hydrolyzing]                                                              | Medium     | Y         | 0.24                | 0.44 | 1.40 |
| 148 | <b>ATAD3B; ATAD3A</b> | ATPase family AAA domain-containing protein 3B;ATPase family AAA domain-containing protein 3A              | Medium     | N         | 0.12                | 1.26 | NaN  |
| 149 | <b>ATP2A2</b>         | Sarcoplasmic/endoplasmic reticulum calcium ATPase 2                                                        | Medium     | N         | 0.03                | 0.43 | 0.83 |
| 150 | <b>ATXN2</b>          | Ataxin-2                                                                                                   | Medium     | N         | 0.04                | 0.71 | 1.71 |
| 151 | <b>ATXN2L</b>         | Ataxin-2-like protein                                                                                      | Medium     | Y         | 0.02                | 0.63 | 1.59 |
| 152 | <b>AXL</b>            | Tyrosine-protein kinase receptor UFO                                                                       | Medium     | N         | 0.36                | 0.52 | 1.57 |
| 153 | <b>BABAM1</b>         | BRISC and BRCA1-A complex member 1                                                                         | Medium     | N         | 0.01                | 0.52 | 1.28 |
| 154 | <b>BAG3</b>           | BAG family molecular chaperone regulator 3                                                                 | Medium     | Y         | -0.08               | 0.59 | 1.72 |
| 155 | <b>BAG6</b>           | Large proline-rich protein BAG6                                                                            | Medium     | Y         | -0.44               | 0.03 | 0.62 |
| 156 | <b>BCAR3</b>          | Breast cancer anti-estrogen resistance protein 3                                                           | Medium     | N         | -0.20               | 0.65 | 1.85 |
| 157 | <b>BLMH</b>           | Bleomycin hydrolase                                                                                        | Medium     | N         | 0.02                | 0.54 | 1.28 |
| 158 | <b>BOLA2</b>          | BolA-like protein 2                                                                                        | Medium     | N         | 0.31                | 1.53 | NaN  |
| 159 | <b>BTD</b>            | Biotinidase                                                                                                | Medium     | Y         | 0.08                | 2.25 | NaN  |
| 160 | <b>BUB1B</b>          | Mitotic checkpoint serine/threonine-protein kinase BUB1 beta                                               | Medium     | N         | -0.15               | 0.72 | NaN  |
| 161 | <b>CACYBP</b>         | Calcyclin-binding protein                                                                                  | Medium     | N         | 0.27                | 0.14 | 0.74 |
| 162 | <b>CAD</b>            | CAD protein;Glutamine-dependent carbamoyl-phosphate synthase;Aspartate carbamoyltransferase;Dihydroorotase | Medium     | Y         | 0.22                | 0.71 | 1.47 |
| 163 | <b>CAPRIN1</b>        | Caprin-1                                                                                                   | Medium     | N         | -0.11               | 0.29 | 0.74 |
| 164 | <b>CBL</b>            | E3 ubiquitin-protein ligase CBL                                                                            | Medium     | N         | -0.14               | 0.55 | 1.26 |
| 165 | <b>CDC27</b>          | Cell division cycle protein 27 homolog                                                                     | Medium     | N         | -0.01               | 0.59 | 1.06 |
| 166 | <b>CEP170</b>         | Centrosomal protein of 170 kDa                                                                             | Medium     | N         | -0.14               | 0.32 | 1.63 |

|     | Gene names             | Protein names                                                                                                                              | Confidence | Conserved | Log <sub>2</sub> QS |      |      |
|-----|------------------------|--------------------------------------------------------------------------------------------------------------------------------------------|------------|-----------|---------------------|------|------|
|     |                        |                                                                                                                                            |            |           | Sulforaphane (μM)   |      |      |
|     |                        |                                                                                                                                            |            |           | 5                   | 25   | 100  |
| 167 | <b>CHORDC1</b>         | Cysteine and histidine-rich domain-containing protein 1                                                                                    | Medium     | N         | -0.48               | 0.37 | 1.35 |
| 168 | <b>CIAPIN1</b>         | Anamorsin                                                                                                                                  | Medium     | N         | -0.03               | 0.28 | 1.17 |
| 169 | <b>CKAP4</b>           | Cytoskeleton-associated protein 4                                                                                                          | Medium     | Y         | -0.03               | 0.54 | 1.15 |
| 170 | <b>CKAP5</b>           | Cytoskeleton-associated protein 5                                                                                                          | Medium     | N         | -0.17               | 0.64 | 1.19 |
| 171 | <b>CNN2</b>            | Calponin-2                                                                                                                                 | Medium     | N         | -0.18               | 0.06 | 1.05 |
| 172 | <b>COPB1</b>           | Coatamer subunit beta                                                                                                                      | Medium     | N         | 0.07                | 0.43 | 0.85 |
| 173 | <b>CORO1C</b>          | Coronin-1C;Coronin                                                                                                                         | Medium     | N         | -0.10               | 0.47 | 0.92 |
| 174 | <b>CPNE1</b>           | Copine-1                                                                                                                                   | Medium     | N         | -0.01               | 0.28 | 0.82 |
| 175 | <b>CPOX</b>            | Coproporphyrinogen-III oxidase, mitochondrial                                                                                              | Medium     | N         | -0.04               | 0.60 | 1.00 |
| 176 | <b>CREM;ATF1;CREB1</b> | Cyclic AMP-dependent transcription factor ATF-1;Cyclic AMP-responsive element-binding protein 1                                            | Medium     | N         | 0.01                | 0.95 | 1.92 |
| 177 | <b>CRKL</b>            | Crk-like protein                                                                                                                           | Medium     | Y         | 0.37                | 1.14 | 1.83 |
| 178 | <b>CSTB</b>            | Cystatin-B                                                                                                                                 | Medium     | N         | 0.18                | 1.45 | 2.80 |
| 179 | <b>CTH</b>             | Cystathionine gamma-lyase                                                                                                                  | Medium     | N         | 0.70                | 0.23 | 1.01 |
| 180 | <b>CTPS1</b>           | CTP synthase 1                                                                                                                             | Medium     | N         | 0.15                | 0.57 | 0.89 |
| 181 | <b>CTSB</b>            | Cathepsin B;Cathepsin B light chain;Cathepsin B heavy chain                                                                                | Medium     | Y         | -0.27               | 0.36 | 0.84 |
| 182 | <b>CTSC</b>            | Dipeptidyl peptidase 1;Dipeptidyl peptidase 1 exclusion domain chain;Dipeptidyl peptidase 1 heavy chain;Dipeptidyl peptidase 1 light chain | Medium     | Y         | 0.09                | 0.70 | 2.71 |
| 183 | <b>CTTN</b>            | Src substrate cortactin                                                                                                                    | Medium     | Y         | -0.29               | 0.36 | 1.20 |
| 184 | <b>CYFIP1;CYFIP2</b>   | Cytoplasmic FMR1-interacting protein 1;Cytoplasmic FMR1-interacting protein 2                                                              | Medium     | N         | -0.06               | 0.50 | 0.97 |
| 185 | <b>DBN1</b>            | Drebrin                                                                                                                                    | Medium     | N         | -0.11               | 0.41 | 1.26 |
| 186 | <b>DBNL</b>            | Drebrin-like protein                                                                                                                       | Medium     | N         | -0.19               | 0.61 | 1.31 |
| 187 | <b>DDX24</b>           | ATP-dependent RNA helicase DDX24                                                                                                           | Medium     | N         | 0.07                | 0.55 | 1.61 |
| 188 | <b>DDX47</b>           | Probable ATP-dependent RNA helicase DDX47                                                                                                  | Medium     | N         | -0.15               | 0.36 | 1.43 |
| 189 | <b>DECR1</b>           | 2,4-dienoyl-CoA reductase, mitochondrial                                                                                                   | Medium     | N         | 0.03                | 0.34 | 0.59 |
| 190 | <b>DEK</b>             | Protein DEK                                                                                                                                | Medium     | N         | -0.22               | 0.35 | 1.13 |
| 191 | <b>DENR</b>            | Density-regulated protein                                                                                                                  | Medium     | N         | -0.19               | 0.19 | 1.03 |
| 192 | <b>DHX15</b>           | Putative pre-mRNA-splicing factor ATP-dependent RNA helicase DHX15                                                                         | Medium     | Y         | 0.09                | 0.67 | 0.96 |
| 193 | <b>DHX30</b>           | Putative ATP-dependent RNA helicase DHX30                                                                                                  | Medium     | N         | 0.01                | 0.44 | 1.26 |
| 194 | <b>DIAPH1</b>          | Protein diaphanous homolog 1                                                                                                               | Medium     | Y         | -0.28               | 0.32 | 1.08 |
| 195 | <b>DIAPH3</b>          | Protein diaphanous homolog 3                                                                                                               | Medium     | N         | -0.07               | 0.84 | 1.26 |
| 196 | <b>DIDO1</b>           | Death-inducer obliterator 1                                                                                                                | Medium     | N         | -0.18               | 0.66 | 1.85 |
| 197 | <b>DLGAP4</b>          | Disks large-associated protein 4                                                                                                           | Medium     | N         | -0.05               | 1.13 | NaN  |
| 198 | <b>DNM1L</b>           | Dynamin-1-like protein                                                                                                                     | Medium     | Y         | -0.13               | 0.27 | 1.12 |
| 199 | <b>DNPEP</b>           | Aspartyl aminopeptidase                                                                                                                    | Medium     | Y         | -0.13               | 0.66 | 1.79 |
| 200 | <b>DPYSL2</b>          | Dihydropyrimidinase-related protein 2                                                                                                      | Medium     | N         | -0.09               | 0.56 | 1.09 |
| 201 | <b>DSTN</b>            | Destrin                                                                                                                                    | Medium     | Y         | -0.10               | 0.41 | 1.16 |
| 202 | <b>DUT</b>             | Deoxyuridine 5-triphosphate nucleotidohydrolase, mitochondrial                                                                             | Medium     | Y         | 0.29                | 0.76 | 1.42 |
| 203 | <b>EDC4</b>            | Enhancer of mRNA-decapping protein 4                                                                                                       | Medium     | Y         | 0.00                | 0.68 | 1.44 |
| 204 | <b>EFHD2</b>           | EF-hand domain-containing protein D2                                                                                                       | Medium     | N         | -0.12               | 0.43 | 1.65 |
| 205 | <b>EIF3G</b>           | Eukaryotic translation initiation factor 3 subunit G                                                                                       | Medium     | Y         | -0.20               | 0.31 | 1.06 |

|     | Gene names     | Protein names                                                                                                                                                                                                                                                                                                                                                                                                                                                          | Confidence | Conserved | Log <sub>2</sub> QS |      |      |
|-----|----------------|------------------------------------------------------------------------------------------------------------------------------------------------------------------------------------------------------------------------------------------------------------------------------------------------------------------------------------------------------------------------------------------------------------------------------------------------------------------------|------------|-----------|---------------------|------|------|
|     |                |                                                                                                                                                                                                                                                                                                                                                                                                                                                                        |            |           | Sulforaphane (μM)   |      |      |
|     |                |                                                                                                                                                                                                                                                                                                                                                                                                                                                                        |            |           | 5                   | 25   | 100  |
| 206 | <b>EIF5B</b>   | Eukaryotic translation initiation factor 5B                                                                                                                                                                                                                                                                                                                                                                                                                            | Medium     | N         | 0.10                | 0.01 | 0.94 |
| 207 | <b>ELAC2</b>   | Zinc phosphodiesterase ELAC protein 2                                                                                                                                                                                                                                                                                                                                                                                                                                  | Medium     | Y         | 0.07                | 0.78 | 1.59 |
| 208 | <b>EPRS</b>    | Bifunctional glutamate/proline--tRNA ligase;Glutamate--tRNA ligase;Proline--tRNA ligase                                                                                                                                                                                                                                                                                                                                                                                | Medium     | Y         | 0.02                | 0.42 | 1.07 |
| 209 | <b>EPS8L2</b>  | Epidermal growth factor receptor kinase substrate 8-like protein 2                                                                                                                                                                                                                                                                                                                                                                                                     | Medium     | Y         | 0.09                | 0.68 | 1.59 |
| 210 | <b>ERCC6L</b>  | DNA excision repair protein ERCC-6-like                                                                                                                                                                                                                                                                                                                                                                                                                                | Medium     | N         | -0.07               | 0.54 | 1.81 |
| 211 | <b>EXOSC10</b> | Exosome component 10                                                                                                                                                                                                                                                                                                                                                                                                                                                   | Medium     | N         | 0.15                | 0.63 | 1.61 |
| 212 | <b>FAM129A</b> | Protein Niban                                                                                                                                                                                                                                                                                                                                                                                                                                                          | Medium     | N         | -0.01               | 0.59 | 1.66 |
| 213 | <b>FASN</b>    | Fatty acid synthase;[Acyl-carrier-protein] S-acetyltransferase;[Acyl-carrier-protein] S-malonyltransferase;3-oxoacyl-[acyl-carrier-protein] synthase;3-oxoacyl-[acyl-carrier-protein] reductase;3-hydroxyacyl-[acyl-carrier-protein] dehydratase;Enoyl-[acyl-carrier-protein] reductase;Oleoyl-[acyl-carrier-protein] hydrolase                                                                                                                                        | Medium     | Y         | 0.14                | 0.63 | 0.98 |
| 214 | <b>FKBP8</b>   | Peptidyl-prolyl cis-trans isomerase FKBP8;Peptidyl-prolyl cis-trans isomerase                                                                                                                                                                                                                                                                                                                                                                                          | Medium     | N         | -0.02               | 0.73 | 1.50 |
| 215 | <b>FLII</b>    | Protein flightless-1 homolog                                                                                                                                                                                                                                                                                                                                                                                                                                           | Medium     | Y         | -0.01               | 0.41 | 1.35 |
| 216 | <b>FLNB</b>    | Filamin-B                                                                                                                                                                                                                                                                                                                                                                                                                                                              | Medium     | N         | -0.05               | 0.26 | 0.68 |
| 217 | <b>FMR1</b>    | Fragile X mental retardation protein 1                                                                                                                                                                                                                                                                                                                                                                                                                                 | Medium     | Y         | 0.09                | 1.07 | NaN  |
| 218 | <b>FNBP1</b>   | Formin-binding protein 1                                                                                                                                                                                                                                                                                                                                                                                                                                               | Medium     | N         | 0.26                | 0.81 | NaN  |
| 219 | <b>FRMD6</b>   | FERM domain-containing protein 6                                                                                                                                                                                                                                                                                                                                                                                                                                       | Medium     | N         | -0.04               | 0.28 | 1.11 |
| 220 | <b>FTO</b>     | Alpha-ketoglutarate-dependent dioxygenase FTO                                                                                                                                                                                                                                                                                                                                                                                                                          | Medium     | N         | -0.10               | 0.41 | 1.64 |
| 221 | <b>GARS</b>    | Glycine--tRNA ligase                                                                                                                                                                                                                                                                                                                                                                                                                                                   | Medium     | Y         | 0.13                | 0.48 | 1.12 |
| 222 | <b>GART</b>    | Trifunctional purine biosynthetic protein adenosine-3;Phosphoribosylamine--glycine ligase;Phosphoribosylformylglycinamide cyclo-ligase;Phosphoribosylglycinamide formyltransferase                                                                                                                                                                                                                                                                                     | Medium     | Y         | 0.05                | 0.28 | 0.80 |
| 223 | <b>GBE1</b>    | 1,4-alpha-glucan-branching enzyme                                                                                                                                                                                                                                                                                                                                                                                                                                      | Medium     | N         | 0.01                | 0.54 | 1.40 |
| 224 | <b>GEMIN5</b>  | Gem-associated protein 5                                                                                                                                                                                                                                                                                                                                                                                                                                               | Medium     | Y         | 0.06                | 0.54 | 1.32 |
| 225 | <b>GFPT1</b>   | Glutamine--fructose-6-phosphate aminotransferase [isomerizing] 1                                                                                                                                                                                                                                                                                                                                                                                                       | Medium     | Y         | 0.10                | 0.67 | 1.61 |
| 226 | <b>GLOD4</b>   | Glyoxalase domain-containing protein 4                                                                                                                                                                                                                                                                                                                                                                                                                                 | Medium     | Y         | -0.02               | 0.70 | 1.78 |
| 227 | <b>GMPS</b>    | GMP synthase [glutamine-hydrolyzing]                                                                                                                                                                                                                                                                                                                                                                                                                                   | Medium     | Y         | 0.12                | 0.37 | 0.97 |
| 228 | <b>GNE</b>     | Bifunctional UDP-N-acetylglucosamine 2-epimerase/N-acetylmannosamine kinase;UDP-N-acetylglucosamine 2-epimerase (hydrolyzing);N-acetylmannosamine kinase                                                                                                                                                                                                                                                                                                               | Medium     | N         | -0.15               | 0.37 | 1.09 |
| 229 | <b>GPD2</b>    | Glycerol-3-phosphate dehydrogenase, mitochondrial                                                                                                                                                                                                                                                                                                                                                                                                                      | Medium     | N         | -0.13               | 0.24 | 0.79 |
| 230 | <b>GSTM3</b>   | Glutathione S-transferase Mu 3                                                                                                                                                                                                                                                                                                                                                                                                                                         | Medium     | Y         | 0.00                | 0.55 | 1.02 |
| 231 | <b>GTF2I</b>   | General transcription factor II-I                                                                                                                                                                                                                                                                                                                                                                                                                                      | Medium     | N         | -0.32               | 0.35 | 0.96 |
| 232 | <b>HDAC1</b>   | Histone deacetylase 1                                                                                                                                                                                                                                                                                                                                                                                                                                                  | Medium     | N         | -0.13               | 0.43 | 0.87 |
| 233 | <b>HDGF</b>    | Hepatoma-derived growth factor                                                                                                                                                                                                                                                                                                                                                                                                                                         | Medium     | Y         | -0.01               | 0.48 | 1.28 |
| 234 | <b>HEATR3</b>  | HEAT repeat-containing protein 3                                                                                                                                                                                                                                                                                                                                                                                                                                       | Medium     | N         | 0.21                | 1.33 | 2.85 |
| 235 | <b>HECTD1</b>  | E3 ubiquitin-protein ligase HECTD1                                                                                                                                                                                                                                                                                                                                                                                                                                     | Medium     | Y         | 0.14                | 0.50 | 0.96 |
| 236 | <b>HEXIM1</b>  | Protein HEXIM1                                                                                                                                                                                                                                                                                                                                                                                                                                                         | Medium     | N         | -0.30               | 0.51 | 1.48 |
| 237 | <b>HLA-A</b>   | HLA class I histocompatibility antigen, A-2 alpha chain;HLA class I histocompatibility antigen, A-69 alpha chain;HLA class I histocompatibility antigen, A-74 alpha chain;HLA class I histocompatibility antigen, A-68 alpha chain;HLA class I histocompatibility antigen, A-31 alpha chain;HLA class I histocompatibility antigen, A-32 alpha chain;HLA class I histocompatibility antigen, A-33 alpha chain;HLA class I histocompatibility antigen, A-29 alpha chain | Medium     | N         | -0.31               | 0.48 | 1.12 |

|     | Gene names          | Protein names                                                                                                                                                                                                                                                                                                                                                                                                                                                                                                                         | Confidence | Conserved | Log <sub>2</sub> QS |       |      |
|-----|---------------------|---------------------------------------------------------------------------------------------------------------------------------------------------------------------------------------------------------------------------------------------------------------------------------------------------------------------------------------------------------------------------------------------------------------------------------------------------------------------------------------------------------------------------------------|------------|-----------|---------------------|-------|------|
|     |                     |                                                                                                                                                                                                                                                                                                                                                                                                                                                                                                                                       |            |           | Sulforaphane (μM)   |       |      |
|     |                     |                                                                                                                                                                                                                                                                                                                                                                                                                                                                                                                                       |            |           | 5                   | 25    | 100  |
| 238 | <b>HLA-C</b>        | HLA class I histocompatibility antigen, Cw-12 alpha chain;HLA class I histocompatibility antigen, Cw-15 alpha chain;HLA class I histocompatibility antigen, Cw-16 alpha chain;HLA class I histocompatibility antigen, Cw-14 alpha chain;HLA class I histocompatibility antigen, Cw-8 alpha chain;HLA class I histocompatibility antigen, Cw-6 alpha chain;HLA class I histocompatibility antigen, Cw-4 alpha chain;HLA class I histocompatibility antigen, Cw-5 alpha chain;HLA class I histocompatibility antigen, Cw-18 alpha chain | Medium     | N         | -0.22               | 0.75  | 1.37 |
| 239 | <b>HNRNPF</b>       | Heterogeneous nuclear ribonucleoprotein F;Heterogeneous nuclear ribonucleoprotein F, N-terminally processed                                                                                                                                                                                                                                                                                                                                                                                                                           | Medium     | Y         | 0.00                | 0.56  | 1.13 |
| 240 | <b>HPCAL1; HPCA</b> | Hippocalcin-like protein 1;Neuron-specific calcium-binding protein hippocalcin                                                                                                                                                                                                                                                                                                                                                                                                                                                        | Medium     | N         | 0.01                | 0.47  | 1.32 |
| 241 | <b>HPRT1</b>        | Hypoxanthine-guanine phosphoribosyltransferase                                                                                                                                                                                                                                                                                                                                                                                                                                                                                        | Medium     | Y         | 0.21                | 0.47  | 1.08 |
| 242 | <b>HSD17B10</b>     | 3-hydroxyacyl-CoA dehydrogenase type-2                                                                                                                                                                                                                                                                                                                                                                                                                                                                                                | Medium     | Y         | 0.08                | 0.71  | 1.49 |
| 243 | <b>HSPA4L</b>       | Heat shock 70 kDa protein 4L                                                                                                                                                                                                                                                                                                                                                                                                                                                                                                          | Medium     | N         | 0.10                | 0.34  | 0.85 |
| 244 | <b>HSPB1</b>        | Heat shock protein beta-1                                                                                                                                                                                                                                                                                                                                                                                                                                                                                                             | Medium     | Y         | 0.06                | 0.64  | 2.03 |
| 245 | <b>HSPBP1</b>       | Hsp70-binding protein 1                                                                                                                                                                                                                                                                                                                                                                                                                                                                                                               | Medium     | Y         | 0.16                | 0.57  | 1.62 |
| 246 | <b>HSPH1</b>        | Heat shock protein 105 kDa                                                                                                                                                                                                                                                                                                                                                                                                                                                                                                            | Medium     | Y         | -0.01               | 0.26  | 0.81 |
| 247 | <b>HUWE1</b>        | E3 ubiquitin-protein ligase HUWE1                                                                                                                                                                                                                                                                                                                                                                                                                                                                                                     | Medium     | Y         | 0.10                | 0.54  | 1.20 |
| 248 | <b>IFI16</b>        | Gamma-interferon-inducible protein 16                                                                                                                                                                                                                                                                                                                                                                                                                                                                                                 | Medium     | N         | -0.29               | 0.65  | 1.26 |
| 249 | <b>IFIT3</b>        | Interferon-induced protein with tetratricopeptide repeats 3                                                                                                                                                                                                                                                                                                                                                                                                                                                                           | Medium     | N         | -0.01               | 0.59  | 1.31 |
| 250 | <b>IMPDH2</b>       | Inosine-5-monophosphate dehydrogenase 2                                                                                                                                                                                                                                                                                                                                                                                                                                                                                               | Medium     | Y         | 0.09                | 0.40  | 1.01 |
| 251 | <b>INF2</b>         | Inverted formin-2                                                                                                                                                                                                                                                                                                                                                                                                                                                                                                                     | Medium     | Y         | -0.26               | 0.46  | 1.39 |
| 252 | <b>IPO4</b>         | Importin-4                                                                                                                                                                                                                                                                                                                                                                                                                                                                                                                            | Medium     | N         | 0.31                | 0.34  | 0.82 |
| 253 | <b>IPO5</b>         | Importin-5                                                                                                                                                                                                                                                                                                                                                                                                                                                                                                                            | Medium     | Y         | 0.16                | 0.63  | 1.21 |
| 254 | <b>ISOC2</b>        | Isochorismatase domain-containing protein 2, mitochondrial                                                                                                                                                                                                                                                                                                                                                                                                                                                                            | Medium     | Y         | 0.05                | 0.55  | 1.68 |
| 255 | <b>KDM3B</b>        | Lysine-specific demethylase 3B                                                                                                                                                                                                                                                                                                                                                                                                                                                                                                        | Medium     | Y         | 0.09                | 1.09  | NaN  |
| 256 | <b>KHSRP</b>        | Far upstream element-binding protein 2                                                                                                                                                                                                                                                                                                                                                                                                                                                                                                | Medium     | Y         | -0.11               | 0.57  | 1.18 |
| 257 | <b>KIF20A</b>       | Kinesin-like protein KIF20A                                                                                                                                                                                                                                                                                                                                                                                                                                                                                                           | Medium     | N         | -0.24               | 0.56  | 0.33 |
| 258 | <b>KIF4A</b>        | Chromosome-associated kinesin KIF4A                                                                                                                                                                                                                                                                                                                                                                                                                                                                                                   | Medium     | N         | -0.25               | 0.66  | 1.42 |
| 259 | <b>KIFC1</b>        | Kinesin-like protein KIFC1                                                                                                                                                                                                                                                                                                                                                                                                                                                                                                            | Medium     | N         | -0.28               | -0.15 | 1.09 |
| 260 | <b>LACTB</b>        | Serine beta-lactamase-like protein LACTB, mitochondrial                                                                                                                                                                                                                                                                                                                                                                                                                                                                               | Medium     | Y         | 0.09                | 1.00  | NaN  |
| 261 | <b>LANCL2</b>       | LanC-like protein 2                                                                                                                                                                                                                                                                                                                                                                                                                                                                                                                   | Medium     | Y         | 0.18                | 1.09  | NaN  |
| 262 | <b>LARP1</b>        | La-related protein 1                                                                                                                                                                                                                                                                                                                                                                                                                                                                                                                  | Medium     | Y         | 0.02                | 0.71  | 1.78 |
| 263 | <b>LARP4</b>        | La-related protein 4                                                                                                                                                                                                                                                                                                                                                                                                                                                                                                                  | Medium     | Y         | 0.08                | 0.45  | 1.71 |
| 264 | <b>LARP4B</b>       | La-related protein 4B                                                                                                                                                                                                                                                                                                                                                                                                                                                                                                                 | Medium     | Y         | -0.10               | 0.50  | 1.44 |
| 265 | <b>LCMT1</b>        | Leucine carboxyl methyltransferase 1                                                                                                                                                                                                                                                                                                                                                                                                                                                                                                  | Medium     | Y         | 0.16                | 1.26  | 3.20 |
| 266 | <b>LGALS1</b>       | Galectin-1                                                                                                                                                                                                                                                                                                                                                                                                                                                                                                                            | Medium     | Y         | -0.06               | 0.39  | 1.02 |
| 267 | <b>LIG1</b>         | DNA ligase 1;DNA ligase                                                                                                                                                                                                                                                                                                                                                                                                                                                                                                               | Medium     | N         | -0.22               | 0.26  | 0.96 |
| 268 | <b>LPCAT2</b>       | Lysophosphatidylcholine acyltransferase 2                                                                                                                                                                                                                                                                                                                                                                                                                                                                                             | Medium     | N         | -0.02               | 0.60  | 1.07 |
| 269 | <b>LRRFIP1</b>      | Leucine-rich repeat flightless-interacting protein 1                                                                                                                                                                                                                                                                                                                                                                                                                                                                                  | Medium     | N         | -0.14               | 0.41  | 1.57 |
| 270 | <b>MAGED2</b>       | Melanoma-associated antigen D2                                                                                                                                                                                                                                                                                                                                                                                                                                                                                                        | Medium     | N         | 0.05                | 0.70  | 1.48 |
| 271 | <b>MALT1</b>        | Mucosa-associated lymphoid tissue lymphoma translocation protein 1                                                                                                                                                                                                                                                                                                                                                                                                                                                                    | Medium     | N         | 0.10                | 0.98  | 2.08 |
| 272 | <b>MAP1B</b>        | Microtubule-associated protein 1B;MAP1B heavy chain;MAP1 light chain LC1                                                                                                                                                                                                                                                                                                                                                                                                                                                              | Medium     | N         | -0.11               | 0.33  | 1.13 |
| 273 | <b>MAP1S</b>        | Microtubule-associated protein 1S;MAP1S heavy chain;MAP1S light chain                                                                                                                                                                                                                                                                                                                                                                                                                                                                 | Medium     | N         | -0.13               | 0.80  | 1.09 |

|     | Gene names            | Protein names                                                                                      | Confidence | Conserved | Log <sub>2</sub> QS |      |      |
|-----|-----------------------|----------------------------------------------------------------------------------------------------|------------|-----------|---------------------|------|------|
|     |                       |                                                                                                    |            |           | Sulforaphane (μM)   |      |      |
|     |                       |                                                                                                    |            |           | 5                   | 25   | 100  |
| 274 | <b>MAP4</b>           | Microtubule-associated protein;Microtubule-associated protein 4                                    | Medium     | N         | -0.18               | 0.47 | 1.50 |
| 275 | <b>MARCKS</b>         | Myristoylated alanine-rich C-kinase substrate                                                      | Medium     | N         | -0.01               | 0.29 | 1.05 |
| 276 | <b>MASTL</b>          | Serine/threonine-protein kinase greatwall                                                          | Medium     | N         | -0.01               | 0.70 | NaN  |
| 277 | <b>MAVS</b>           | Mitochondrial antiviral-signaling protein                                                          | Medium     | Y         | -0.35               | 0.59 | 1.46 |
| 278 | <b>MCM3</b>           | DNA replication licensing factor MCM3                                                              | Medium     | Y         | -0.37               | 0.18 | 0.88 |
| 279 | <b>MICAL2</b>         | Protein-methionine sulfoxide oxidase MICAL2                                                        | Medium     | N         | -0.22               | 0.54 | 1.28 |
| 280 | <b>MPRIP</b>          | Myosin phosphatase Rho-interacting protein                                                         | Medium     | N         | -0.17               | 0.68 | 1.34 |
| 281 | <b>MSH2</b>           | DNA mismatch repair protein Msh2                                                                   | Medium     | N         | -0.05               | 0.74 | 1.00 |
| 282 | <b>MTA2</b>           | Metastasis-associated protein MTA2                                                                 | Medium     | Y         | -0.16               | 0.63 | 1.52 |
| 283 | <b>MYH9</b>           | Myosin-9                                                                                           | Medium     | Y         | -0.09               | 0.29 | 0.82 |
| 284 | <b>MYL6</b>           | Myosin light polypeptide 6                                                                         | Medium     | Y         | -0.04               | 0.37 | 1.31 |
| 285 | <b>NASP</b>           | Nuclear autoantigenic sperm protein                                                                | Medium     | N         | -0.05               | 0.21 | 0.81 |
| 286 | <b>NBN</b>            | Nibrin                                                                                             | Medium     | N         | -0.20               | 0.71 | 1.87 |
| 287 | <b>NCAPG</b>          | Condensin complex subunit 3                                                                        | Medium     | N         | -0.20               | 0.64 | 1.13 |
| 288 | <b>NCEH1</b>          | Neutral cholesterol ester hydrolase 1                                                              | Medium     | N         | 0.09                | 0.46 | 1.06 |
| 289 | <b>NEDD4L</b>         | E3 ubiquitin-protein ligase NEDD4-like                                                             | Medium     | N         | 0.24                | 0.68 | 1.53 |
| 290 | <b>NHLRC2</b>         | NHL repeat-containing protein 2                                                                    | Medium     | N         | 0.13                | 0.55 | 0.99 |
| 291 | <b>NKRF</b>           | NF-kappa-B-repressing factor                                                                       | Medium     | N         | -0.21               | 0.11 | 1.02 |
| 292 | <b>NONO</b>           | Non-POU domain-containing octamer-binding protein                                                  | Medium     | Y         | -0.29               | 0.40 | 1.29 |
| 293 | <b>NOP58</b>          | Nucleolar protein 58                                                                               | Medium     | N         | 0.01                | 0.49 | 1.38 |
| 294 | <b>NPEPPS</b>         | Puromycin-sensitive aminopeptidase                                                                 | Medium     | N         | -0.05               | 0.27 | 0.94 |
| 295 | <b>NRD1</b>           | Nardilysin                                                                                         | Medium     | N         | -0.04               | 0.51 | 1.15 |
| 296 | <b>NSUN2</b>          | tRNA (cytosine(34)-C(5))-methyltransferase                                                         | Medium     | N         | 0.05                | 0.42 | 0.94 |
| 297 | <b>NUDC</b>           | Nuclear migration protein nudC                                                                     | Medium     | Y         | 0.03                | 0.40 | 1.26 |
| 298 | <b>NUDCD1</b>         | NudC domain-containing protein 1                                                                   | Medium     | Y         | 0.18                | 0.68 | 1.64 |
| 299 | <b>NUP153</b>         | Nuclear pore complex protein Nup153                                                                | Medium     | N         | -0.05               | 0.28 | 1.32 |
| 300 | <b>NUP155</b>         | Nuclear pore complex protein Nup155                                                                | Medium     | Y         | 0.22                | 0.81 | 1.67 |
| 301 | <b>NUP93</b>          | Nuclear pore complex protein Nup93                                                                 | Medium     | N         | 0.45                | 0.71 | 0.44 |
| 302 | <b>OSBP</b>           | Oxysterol-binding protein 1                                                                        | Medium     | N         | 0.02                | 0.33 | 1.09 |
| 303 | <b>OTUD6B</b>         | OTU domain-containing protein 6B                                                                   | Medium     | Y         | 0.08                | 0.66 | 1.35 |
| 304 | <b>PABPC4</b>         | Polyadenylate-binding protein 4                                                                    | Medium     | N         | 0.00                | 0.66 | 0.93 |
| 305 | <b>PBK</b>            | Lymphokine-activated killer T-cell-originated protein kinase                                       | Medium     | N         | -0.07               | 0.69 | 2.10 |
| 306 | <b>PCBP1</b>          | Poly(rC)-binding protein 1                                                                         | Medium     | Y         | -0.05               | 0.69 | 1.81 |
| 307 | <b>PCBP2</b>          | Poly(rC)-binding protein 2                                                                         | Medium     | Y         | -0.25               | 0.38 | 0.98 |
| 308 | <b>PCMT1</b>          | Protein-L-isoaspartate(D-aspartate) O-methyltransferase;Protein-L-isoaspartate O-methyltransferase | Medium     | Y         | 0.07                | 0.67 | 1.90 |
| 309 | <b>PCYT1A; PCYT1B</b> | Choline-phosphate cytidylyltransferase A;Choline-phosphate cytidylyltransferase B                  | Medium     | Y         | -0.09               | 0.94 | 2.15 |
| 310 | <b>PDCD6IP</b>        | Programmed cell death 6-interacting protein                                                        | Medium     | Y         | -0.04               | 0.35 | 1.01 |
| 311 | <b>PDE12</b>          | 2,5-phosphodiesterase 12                                                                           | Medium     | Y         | -0.03               | 0.54 | 1.07 |
| 312 | <b>PDS5A</b>          | Sister chromatid cohesion protein PDS5 homolog A                                                   | Medium     | N         | -0.26               | 0.55 | 0.91 |
| 313 | <b>PEPD</b>           | Xaa-Pro dipeptidase                                                                                | Medium     | N         | -0.16               | 0.67 | 0.97 |
| 314 | <b>PFAS</b>           | Phosphoribosylformylglycinamide synthase                                                           | Medium     | Y         | 0.11                | 0.78 | 1.65 |

|     | Gene names      | Protein names                                                                   | Confidence | Conserved | Log <sub>2</sub> QS |      |      |
|-----|-----------------|---------------------------------------------------------------------------------|------------|-----------|---------------------|------|------|
|     |                 |                                                                                 |            |           | Sulforaphane (μM)   |      |      |
|     |                 |                                                                                 |            |           | 5                   | 25   | 100  |
| 315 | <b>PGPEP1</b>   | Pyroglutamyl-peptidase 1                                                        | Medium     | Y         | -0.11               | 0.40 | 1.62 |
| 316 | <b>PLEC</b>     | Plectin                                                                         | Medium     | N         | -0.02               | 0.35 | 0.99 |
| 317 | <b>PLS3</b>     | Plastin-3                                                                       | Medium     | N         | 0.05                | 0.57 | 1.12 |
| 318 | <b>POLR2B</b>   | DNA-directed RNA polymerase;DNA-directed RNA polymerase II subunit RPB2         | Medium     | N         | 0.05                | 0.38 | 1.37 |
| 319 | <b>PPM1G</b>    | Protein phosphatase 1G                                                          | Medium     | Y         | 0.11                | 0.65 | 1.70 |
| 320 | <b>PPME1</b>    | Protein phosphatase methylesterase 1                                            | Medium     | Y         | -0.02               | 0.18 | 0.73 |
| 321 | <b>PPP1R12A</b> | Protein phosphatase 1 regulatory subunit 12A                                    | Medium     | N         | -0.19               | 0.57 | 0.86 |
| 322 | <b>PPP1R18</b>  | Phostensin                                                                      | Medium     | N         | -0.30               | 0.64 | 1.17 |
| 323 | <b>PPP2R5D</b>  | Serine/threonine-protein phosphatase 2A 56 kDa regulatory subunit delta isoform | Medium     | N         | 0.12                | 0.63 | 1.28 |
| 324 | <b>PPP4R1</b>   | Serine/threonine-protein phosphatase 4 regulatory subunit 1                     | Medium     | N         | 0.04                | 0.79 | 1.77 |
| 325 | <b>PPP6R3</b>   | Serine/threonine-protein phosphatase 6 regulatory subunit 3                     | Medium     | Y         | -0.09               | 0.36 | 1.27 |
| 326 | <b>PRKDC</b>    | DNA-dependent protein kinase catalytic subunit                                  | Medium     | Y         | -0.16               | 0.72 | 1.17 |
| 327 | <b>PRMT1</b>    | Protein arginine N-methyltransferase 1                                          | Medium     | Y         | -0.06               | 0.43 | 1.34 |
| 328 | <b>PRMT3</b>    | Protein arginine N-methyltransferase 3                                          | Medium     | Y         | NaN                 | 1.00 | NaN  |
| 329 | <b>PRPF40A</b>  | Pre-mRNA-processing factor 40 homolog A                                         | Medium     | N         | -0.29               | 0.29 | 0.76 |
| 330 | <b>PRRC2C</b>   | Protein PRRC2C                                                                  | Medium     | Y         | -0.07               | 0.69 | 1.54 |
| 331 | <b>PTGES3</b>   | Prostaglandin E synthase 3                                                      | Medium     | Y         | 0.11                | 0.72 | 1.97 |
| 332 | <b>PTPN12</b>   | Tyrosine-protein phosphatase non-receptor type 12                               | Medium     | N         | -0.31               | 0.64 | 1.61 |
| 333 | <b>PUM1</b>     | Pumilio homolog 1                                                               | Medium     | N         | -0.01               | 0.75 | 1.08 |
| 334 | <b>PYCR2</b>    | Pyrroline-5-carboxylate reductase 2                                             | Medium     | N         | 0.00                | 0.93 | NaN  |
| 335 | <b>PYGB</b>     | Glycogen phosphorylase, brain form                                              | Medium     | Y         | -0.16               | 0.50 | 0.86 |
| 336 | <b>QARS</b>     | Glutamine--tRNA ligase                                                          | Medium     | Y         | -0.06               | 0.48 | 1.06 |
| 337 | <b>RANBP3</b>   | Ran-binding protein 3                                                           | Medium     | N         | -0.19               | 0.38 | 1.38 |
| 338 | <b>RANBP6</b>   | Ran-binding protein 6                                                           | Medium     | Y         | NaN                 | 1.09 | NaN  |
| 339 | <b>RARS</b>     | Arginine--tRNA ligase, cytoplasmic                                              | Medium     | Y         | 0.01                | 0.51 | 1.04 |
| 340 | <b>RASA3</b>    | Ras GTPase-activating protein 3                                                 | Medium     | N         | 0.04                | 0.96 | NaN  |
| 341 | <b>RB1</b>      | Retinoblastoma-associated protein                                               | Medium     | N         | -0.17               | 0.39 | 0.92 |
| 342 | <b>RBM25</b>    | RNA-binding protein 25                                                          | Medium     | N         | -0.15               | 0.43 | 1.11 |
| 343 | <b>RBPJ</b>     | Recombining binding protein suppressor of hairless                              | Medium     | N         | -0.05               | 0.79 | 1.37 |
| 344 | <b>RCC2</b>     | Protein RCC2                                                                    | Medium     | Y         | -0.01               | 0.71 | 1.15 |
| 345 | <b>REEP5</b>    | Receptor expression-enhancing protein 5                                         | Medium     | N         | 0.00                | 0.30 | 0.74 |
| 346 | <b>RIN1</b>     | Ras and Rab interactor 1                                                        | Medium     | N         | 0.12                | 1.14 | 0.74 |
| 347 | <b>RNMT</b>     | mRNA cap guanine-N7 methyltransferase                                           | Medium     | N         | 0.06                | 0.63 | 1.58 |
| 348 | <b>RPS6KA4</b>  | Ribosomal protein S6 kinase;Ribosomal protein S6 kinase alpha-4                 | Medium     | N         | 0.53                | 1.40 | NaN  |
| 349 | <b>RRBP1</b>    | Ribosome-binding protein 1                                                      | Medium     | Y         | -0.01               | 0.63 | 1.14 |
| 350 | <b>S100A4</b>   | Protein S100-A4                                                                 | Medium     | N         | -0.66               | 0.75 | 0.17 |
| 351 | <b>SAFB</b>     | Scaffold attachment factor B1                                                   | Medium     | N         | -0.20               | 0.56 | 1.26 |
| 352 | <b>SAFB2</b>    | Scaffold attachment factor B2                                                   | Medium     | N         | -0.27               | 0.45 | 1.26 |
| 353 | <b>SCAF11</b>   | Protein SCAF11                                                                  | Medium     | N         | -0.15               | 0.70 | 1.65 |
| 354 | <b>SEC24C</b>   | Protein transport protein Sec24C                                                | Medium     | Y         | -0.05               | 0.69 | 1.20 |
| 355 | <b>SEC61B</b>   | Protein transport protein Sec61 subunit beta                                    | Medium     | N         | 0.04                | 0.11 | 1.77 |

|     | Gene names                | Protein names                                                                    | Confidence | Conserved | Log <sub>2</sub> QS |      |      |
|-----|---------------------------|----------------------------------------------------------------------------------|------------|-----------|---------------------|------|------|
|     |                           |                                                                                  |            |           | Sulforaphane (μM)   |      |      |
|     |                           |                                                                                  |            |           | 5                   | 25   | 100  |
| 356 | <b>SEPT9</b>              | Septin-9                                                                         | Medium     | N         | -0.31               | 0.37 | 1.14 |
| 357 | <b>SERPINB6</b>           | Serpin B6                                                                        | Medium     | N         | 0.00                | 0.52 | 1.37 |
| 358 | <b>SERPINB9</b>           | Serpin B9                                                                        | Medium     | N         | -0.29               | 0.66 | 0.94 |
| 359 | <b>SF1</b>                | Splicing factor 1                                                                | Medium     | N         | 0.09                | 0.55 | 1.63 |
| 360 | <b>SFN</b>                | 14-3-3 protein sigma                                                             | Medium     | Y         | -0.13               | 0.67 | 1.32 |
| 361 | <b>SLC9A3R2</b>           | Na(+)/H(+) exchange regulatory cofactor NHE-RF2                                  | Medium     | N         | -0.29               | 0.23 | 0.72 |
| 362 | <b>SLK</b>                | STE20-like serine/threonine-protein kinase                                       | Medium     | N         | 0.10                | 0.53 | 1.45 |
| 363 | <b>SMC2</b>               | Structural maintenance of chromosomes protein 2                                  | Medium     | Y         | -0.38               | 0.26 | 0.98 |
| 364 | <b>SMCHD1</b>             | Structural maintenance of chromosomes flexible hinge domain-containing protein 1 | Medium     | N         | -0.06               | 0.79 | 1.77 |
| 365 | <b>SMURF2</b>             | E3 ubiquitin-protein ligase SMURF2                                               | Medium     | N         | -0.02               | 0.52 | 1.28 |
| 366 | <b>SOAT1</b>              | Sterol O-acyltransferase 1                                                       | Medium     | N         | -0.12               | 0.83 | NaN  |
| 367 | <b>SP100</b>              | Nuclear autoantigen Sp-100                                                       | Medium     | N         | -0.14               | 0.52 | 1.65 |
| 368 | <b>SPTLC2</b>             | Serine palmitoyltransferase 2                                                    | Medium     | Y         | 0.05                | 0.82 | 1.97 |
| 369 | <b>SQSTM1</b>             | Sequestosome-1                                                                   | Medium     | Y         | -0.05               | 0.41 | 1.43 |
| 370 | <b>SRPK1</b>              | SRSF protein kinase 1                                                            | Medium     | N         | 0.21                | 0.79 | 0.91 |
| 371 | <b>SRPR</b>               | Signal recognition particle receptor subunit alpha                               | Medium     | N         | 0.07                | 0.74 | 1.63 |
| 372 | <b>STAT1</b>              | Signal transducer and activator of transcription 1-alpha/beta                    | Medium     | Y         | 0.13                | 0.75 | 0.98 |
| 373 | <b>STAU1</b>              | Double-stranded RNA-binding protein Staufen homolog 1                            | Medium     | N         | -0.10               | 0.28 | 0.87 |
| 374 | <b>STK10</b>              | Serine/threonine-protein kinase 10                                               | Medium     | N         | -0.02               | 0.38 | 1.39 |
| 375 | <b>TACC3</b>              | Transforming acidic coiled-coil-containing protein 3                             | Medium     | Y         | -0.17               | 0.43 | 1.07 |
| 376 | <b>TAGLN2</b>             | Transgelin-2                                                                     | Medium     | Y         | 0.44                | 0.91 | 1.79 |
| 377 | <b>TBC1D15</b>            | TBC1 domain family member 15                                                     | Medium     | Y         | -0.09               | 0.39 | 0.97 |
| 378 | <b>TBCD</b>               | Tubulin-specific chaperone D                                                     | Medium     | Y         | 0.06                | 0.23 | 1.06 |
| 379 | <b>TCOF1</b>              | Treacle protein                                                                  | Medium     | N         | -0.12               | 0.50 | 1.02 |
| 380 | <b>THYN1</b>              | Thymocyte nuclear protein 1                                                      | Medium     | N         | 0.21                | 1.28 | NaN  |
| 381 | <b>TIGAR</b>              | Fructose-2,6-bisphosphatase TIGAR                                                | Medium     | Y         | 0.04                | 1.32 | NaN  |
| 382 | <b>TK1</b>                | Thymidine kinase, cytosolic;Thymidine kinase                                     | Medium     | N         | -0.42               | 0.16 | 1.16 |
| 383 | <b>TP53BP1</b>            | Tumor suppressor p53-binding protein 1                                           | Medium     | N         | 0.07                | 0.48 | 1.53 |
| 384 | <b>TPM3;DKFZp686J1372</b> | Tropomyosin alpha-3 chain                                                        | Medium     | Y         | -0.09               | 0.78 | 1.06 |
| 385 | <b>TRIM25</b>             | E3 ubiquitin/ISG15 ligase TRIM25                                                 | Medium     | Y         | 0.02                | 0.79 | 2.75 |
| 386 | <b>TSC22D2</b>            | TSC22 domain family protein 2                                                    | Medium     | N         | -0.19               | 0.41 | 1.31 |
| 387 | <b>TTC1</b>               | Tetratricopeptide repeat protein 1                                               | Medium     | N         | -0.05               | 0.55 | 1.15 |
| 388 | <b>TXLNA</b>              | Alpha-taxilin                                                                    | Medium     | N         | -0.19               | 0.78 | 1.27 |
| 389 | <b>TXLNG</b>              | Gamma-taxilin                                                                    | Medium     | Y         | -0.04               | 0.21 | 1.02 |
| 390 | <b>TXNRD1</b>             | Thioredoxin reductase 1, cytoplasmic                                             | Medium     | Y         | -0.18               | 0.41 | 0.97 |
| 391 | <b>U2AF1</b>              | Splicing factor U2AF 35 kDa subunit                                              | Medium     | N         | -0.04               | 0.29 | 0.87 |
| 392 | <b>UBA6</b>               | Ubiquitin-like modifier-activating enzyme 6                                      | Medium     | Y         | -0.13               | 0.42 | 1.65 |
| 393 | <b>UBAP2</b>              | Ubiquitin-associated protein 2                                                   | Medium     | N         | 0.00                | 0.57 | 1.38 |
| 394 | <b>UBE2O</b>              | Ubiquitin-conjugating enzyme E2 O                                                | Medium     | Y         | 0.53                | 1.28 | 1.68 |
| 395 | <b>USP24</b>              | Ubiquitin carboxyl-terminal hydrolase 24                                         | Medium     | N         | 0.04                | 1.14 | NaN  |

|     | Gene names         | Protein names                                                                                             | Confidence | Conserved | Log <sub>2</sub> QS |       |      |
|-----|--------------------|-----------------------------------------------------------------------------------------------------------|------------|-----------|---------------------|-------|------|
|     |                    |                                                                                                           |            |           | Sulforaphane (μM)   |       |      |
|     |                    |                                                                                                           |            |           | 5                   | 25    | 100  |
| 396 | <b>USP28</b>       | Ubiquitin carboxyl-terminal hydrolase 28;Ubiquitin carboxyl-terminal hydrolase                            | Medium     | N         | -0.20               | 0.35  | 0.93 |
| 397 | <b>USP5</b>        | Ubiquitin carboxyl-terminal hydrolase 5                                                                   | Medium     | Y         | -0.07               | 0.56  | 1.38 |
| 398 | <b>USP7</b>        | Ubiquitin carboxyl-terminal hydrolase 7;Ubiquitin carboxyl-terminal hydrolase                             | Medium     | Y         | 0.00                | 0.32  | 1.01 |
| 399 | <b>USP9X;USP9Y</b> | Probable ubiquitin carboxyl-terminal hydrolase FAF-X;Probable ubiquitin carboxyl-terminal hydrolase FAF-Y | Medium     | N         | 0.04                | 0.56  | 1.07 |
| 400 | <b>VASP</b>        | Vasodilator-stimulated phosphoprotein                                                                     | Medium     | N         | -0.11               | 0.24  | 0.98 |
| 401 | <b>VCPIP1</b>      | Deubiquitinating protein VCIP135                                                                          | Medium     | Y         | 0.21                | 0.87  | NaN  |
| 402 | <b>VEZT</b>        | Vezatin                                                                                                   | Medium     | N         | -0.15               | 0.75  | 1.40 |
| 403 | <b>WAPAL</b>       | Wings apart-like protein homolog                                                                          | Medium     | N         | -0.12               | 0.24  | 1.04 |
| 404 | <b>WDHD1</b>       | WD repeat and HMG-box DNA-binding protein 1                                                               | Medium     | N         | 0.14                | 0.74  | NaN  |
| 405 | <b>WDR62</b>       | WD repeat-containing protein 62                                                                           | Medium     | N         | 0.29                | 0.88  | NaN  |
| 406 | <b>WDR77</b>       | Methylosome protein 50                                                                                    | Medium     | Y         | -0.05               | 0.52  | 1.38 |
| 407 | <b>XPO5</b>        | Exportin-5                                                                                                | Medium     | Y         | 0.43                | 1.43  | NaN  |
| 408 | <b>YRDC</b>        | YrdC domain-containing protein, mitochondrial                                                             | Medium     | N         | -0.05               | 0.92  | 1.68 |
| 409 | <b>ZC3H11A</b>     | Zinc finger CCCH domain-containing protein 11A                                                            | Medium     | N         | -0.21               | 0.63  | 1.45 |
| 410 | <b>ZNF638</b>      | Zinc finger protein 638                                                                                   | Medium     | N         | 0.42                | 1.18  | 1.76 |
| 411 | <b>ZW10</b>        | Centromere/kinetochore protein zw10 homolog                                                               | Medium     | N         | 1.40                | -0.06 | 0.62 |

### 3 Chemical synthesis methods

#### 3.1 General Information

The reagents used during all synthesis processes were obtained from commercial sources (Sigma-Aldrich, VWR and Fisher Scientific) and used without further purification. Reactions were followed by TLC using aluminium-backed silica plate (Merck, TLC Silica Gel 60, F254) and visualised under UV irradiation at 254 nm or using a variety of stains. Flash column chromatography was carried out either by hand-made columns with Merck Silica 60Å or using a Biotage Isolera™ One flash purification system using a wet-loading Biotage SNAP cartridge, collecting fractions using by UV detection at 254 nm when appropriate. Lab distilled water was used unless otherwise stated.

The purity of the compound was determined using NMR spectroscopy, accurate mass spectrometry and LC-MS analysis. All NMR chemical shifts are quoted using tetramethylsilane (TMS) as a reference of ( $\delta_{C/H} = 0$ ).  $^1\text{H}$  and  $^{13}\text{C}$  NMR were both performed on a Bruker AV-400 spectrometer. For  $^1\text{H}$  NMR, the residual solvent peak used as an internal reference was  $\text{CDCl}_3$  ( $\delta_{\text{H}} = 7.26$  ppm),  $\text{CD}_3\text{OD}$  ( $\delta_{\text{H}} = 3.31$  ppm) or  $\text{DMSO-d}_6$  ( $\delta_{\text{H}} = 2.50$  ppm) and chemical shifts are reported as: (multiplicity, coupling constant  $J$  (Hz), number of protons). For  $^{13}\text{C}$  NMR, the residual solvent peak used as an internal reference was  $\text{CDCl}_3$  ( $\delta_{\text{C}} = 77.2$  ppm),  $\text{CD}_3\text{OD}$  ( $\delta_{\text{C}} = 49.0$  ppm) or  $\text{DMSO-d}_6$  ( $\delta_{\text{C}} = 39.5$  ppm).

Mass spectrometry was performed using chemical ionisation (CI), electron ionisation (EI) or electrospray ionisation (ESI) on an AUTOSPEC P673 spectrometer by the Chemistry Department Mass Spectrometry Service at Imperial College London. LC-MS analysis and purification were carried out on a Waters HPLC system equipped with a 2767 autosampler, a 515 pump, a 3100 mass spectrometer with ESI, and a 2998 Photodiode Array Detector (detection at 200-600 nm). The system was fitted with Waters XBridge C18 columns (4.6 mm  $\times$  100 mm for analytical and 19 mm  $\times$  100 mm for preparative LC/MS). The flow rate was 1.2 mL/min for analytical and 20 mL/min for preparative LC-MS, with an 18 min runtime. A gradient of methanol and water, both containing 0.1% of formic acid, was used as the mobile phase.

Syntheses of the AzTB, AzT and AzRB capture reagents were as previously reported.<sup>2-4</sup>

#### 3.2 Synthesis of Probe 1

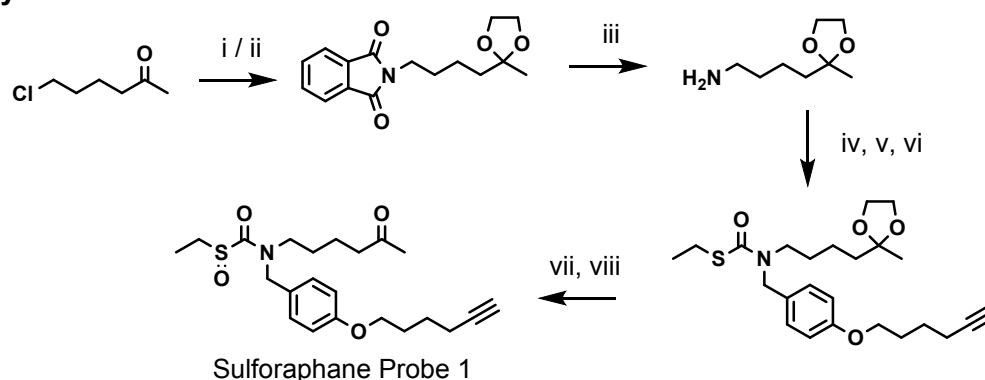

Scheme S1. Synthesis of Probe 1. Reagents and conditions: i) *p*-toluenesulfonic acid, ethylene glycol, toluene, 135 °C; ii) phthalimide,  $\text{K}_2\text{CO}_3$ , KI, DMF; iii)  $\text{NH}_2\text{NH}_2$ , EtOH; iv) 4-hex-5-ynyloxy-benzaldehyde, MeOH; v)  $\text{NaBH}_4$ , MeOH; vi) *S*-ethyl chlorothioformate, DIPEA, DCM, 0 °C; vii) 2 M HCl, THF; viii) *m*-CPBA, DCM, -78 °C.

### 3.2.1 4-Hex-5-ynyloxy-benzaldehyde

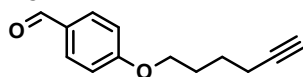

4-hydroxybenzaldehyde (2.0 g, 16.5 mmol) was dissolved in DMF (30 mL).  $K_2CO_3$  (4.5 g, 32.8 mmol) and potassium iodide (1.4 g, 8.2 mmol) were added to form a white suspension. 6-chloro-hex-1-yne (2.7 mL, 22.3 mmol) was added and the resultant light brown suspension stirred at 80 °C for 5 h, and then at room temperature for 2 h. The suspension was diluted with EtOAc and the organic layer washed with water and with brine, dried over sodium sulphate, filtered and concentrated under vacuum to yield a brown oil. The crude product was recrystallized from hexane, filtered under vacuum and washed with ice cold hexane to yield a pale yellow solid (2.7 g, 81%).  $^1H$  NMR:  $\delta_H$ /ppm (400 MHz,  $CDCl_3$ ) 9.91 (s, 1H), 7.86 (m, 2H), 7.02 (m, 2H), 4.10 (t,  $J$  = 6.3 Hz, 2H), 2.32 (td,  $J$  = 2.6, 7.0 Hz, 2H), 1.98 (m, 3H), 1.77 (m, 2H).  $^{13}C$  NMR:  $\delta_C$ /ppm (101 MHz,  $CDCl_3$ ) 190.9, 164.1, 132.02, 129.9, 114.7, 83.9, 68.8, 67.7, 28.1, 24.9, 18.1. ES+ HRMS: found 203.1068 ( $C_{13}H_{15}O_2$ ,  $[M+H]^+$ , requires 203.1072).

### 3.2.2 2-(4-Chloro-butyl)-2-methyl-[1,3]dioxolane

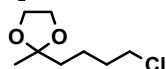

To 6-chloro-2-hexanone (1.0 mL, 7.6 mmol) in toluene (50 mL) was added *p*-toluenesulfonic acid (77 mg, 0.40 mmol) and ethylene glycol (0.85 mL, 15.2 mmol). The suspension was fitted with Dean Stark apparatus and stirred at 160 °C for 4 h. The clear solution was diluted with EtOAc and washed with saturated sodium bicarbonate and brine. The organic layer was dried over sodium sulphate, filtered and concentrated under vacuum to yield a yellow/brown liquid. The crude product was purified by automated silica chromatography eluting in a gradient of hexane/EtOAc to yield a colourless liquid (1.0 g, 75%).  $^1H$  NMR:  $\delta_H$ /ppm (400 MHz,  $CDCl_3$ ) 3.93 (m, 4H), 3.53 (t,  $J$  = 6.7 Hz, 2H), 1.79 (m, 2H), 1.66 (m, 2H), 1.55 (m, 2H), 1.31 (s, 3H).  $^{13}C$  NMR:  $\delta_C$ /ppm (101 MHz,  $CDCl_3$ ) 110.0, 64.8, 45.1, 38.5, 32.8, 23.9, 21.6. ES+ HRMS: found 179.0843 ( $C_8H_{16}O_2Cl$ ,  $[M+H]^+$ , requires 179.0839).

### 3.2.3 2-(4-Phthalimido-butyl)-2-methyl-[1,3]dioxolane

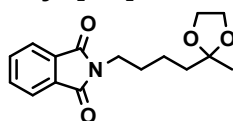

To a suspension of 2-(4-chloro-butyl)-2-methyl-[1,3]dioxolane (320 mg, 1.8 mmol),  $K_2CO_3$  (620 mg, 4.5 mmol) and potassium iodide (16 mg, 0.10 mmol) in DMF (4 mL) was added a solution of phthalimide (310 mg, 2.2 mmol) in DMF (4 mL). The pale yellow suspension was stirred at 80 °C for 17 h, during which time the colour of the suspension deepened to a strong yellow and a pale yellow residue formed. The suspension was cooled to room temperature and diluted with water. The organic layer was extracted with diethyl ether. The organic layers were combined, dried over sodium sulphate, filtered and concentrated under vacuum to yield a pale yellow oil which solidified upon standing. The crude product was purified by flash chromatography, eluting with a hexane/EtOAc gradient to yield a white solid (472 mg, 91%).  $^1H$  NMR:  $\delta_H$ /ppm (400 MHz,  $CDCl_3$ ) 7.86 (dd,  $J$  = 3.0, 5.4 Hz, 2H), 7.73 (dd,  $J$  = 3.0, 5.4 Hz, 2H), 3.95 (m, 4H), 3.71 (m, 2H), 1.70 (m, 4H), 1.47 (m, 2H), 1.33 (s, 3H).  $^{13}C$  NMR:  $\delta_C$ /ppm (101 MHz,  $CDCl_3$ ) 168.5, 134.3, 133.9, 132.2, 123.6, 123.2, 110.0, 109.9,

64.7, 38.6, 37.9, 28.7, 23.8, 21.4. ES+ HRMS: found 290.1376 ( $C_{16}H_{20}NO_4$ ,  $[M+H]^+$ , requires 290.1392).

### 3.2.4 2-(4-Amino-butyl)-2-methyl-[1,3]dioxolane

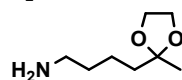

To a solution of 2-(4-phthalimido-butyl)-2-methyl-[1,3]dioxolane (471 mg, 1.4 mmol) in ethanol (20 mL) was added hydrazine monohydrate (250  $\mu$ L, 5.0 mmol). The solution was refluxed at 80 °C for 3 h, during which time a white precipitate was formed. The suspension was cooled to room temperature and the precipitate isolated by filtration. The filtrate was concentrated under vacuum to yield a white residue which was re-dissolved in ethanol, filtered and concentrated under vacuum. The residue was dissolved in DCM, filtered and concentrated to yield a yellow solid (252 mg) which was used without further purification.  $^1H$  NMR:  $\delta_H$ /ppm (400 MHz,  $CDCl_3$ ) 3.83 (m, 4H), 2.56 (t,  $J$  = 6.5 Hz, 2H), 1.53 (m, 2H), 1.34 (m, 4H), 1.21 (s, 3H). ES+ HRMS: found 160.1332 ( $C_8H_{18}NO_2$ ,  $[M+H]^+$ , requires 160.1338).

### 3.2.5 (4-hex-5-ynyloxy-benzyl)-[4-(2-methyl-[1,3]dioxolan-2-yl)-butyl]-amine

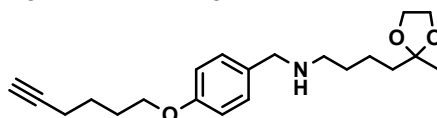

To a suspension of 4-hex-5-ynyloxy-benzaldehyde (204 mg, 1.0 mmol) and sodium sulphate (2.5 g) in dry methanol (4 mL) was added a solution of 2-(4-amino-butyl)-2-methyl-[1,3]dioxolane (108 mg, 0.68 mmol) in dry methanol (2 mL). The suspension was stirred under nitrogen at room temperature for 20 h. The suspension was subsequently cooled to 0 °C and sodium borohydride (51 mg, 1.3 mmol) added. The suspension was stirred at 0 °C for 30 min. Water (40 mL) was added, the methanol removed under vacuum, and the remaining aqueous suspension was extracted with DCM. The organic layers were combined, dried over sodium sulphate and concentrated under vacuum to yield a yellow oil. The crude product was purified by automated silica chromatography with a gradient of 0-20% methanol/1% triethylamine in DCM/1% triethylamine to yield a yellow solid (107 mg, 46%).  $^1H$  NMR:  $\delta_H$ /ppm (400 MHz,  $CDCl_3$ ) 7.28 (d,  $J$  = 8.2 Hz, 2H), 6.87 (d,  $J$  = 8.6 Hz, 2H), 3.98 (t,  $J$  = 6.3 Hz, 2H), 3.93 (m, 4H), 3.77 (s, 2H), 2.65 (m, 2H), 2.29 (td,  $J$  = 2.6, 7.0 Hz, 2H), 1.99 (t,  $J$  = 2.6 Hz, 1H), 1.92 (m, 2H), 1.74 (m, 2H), 1.61 (m, 4H), 1.44 (m, 2H), 1.30 (d,  $J$  = 13.9 Hz, 3H)  $^{13}C$  NMR:  $\delta_C$ /ppm (101 MHz,  $CDCl_3$ ) 158.3, 130.7, 129.7, 114.4, 110.0, 84.1, 68.7, 67.3, 64.6, 52.9, 48.6, 39.0, 29.5, 28.3, 25.0, 23.8, 21.8, 18.2. ES+ HRMS: found 346.2369 ( $C_{21}H_{32}NO_3$ ,  $[M+H]^+$ , requires 346.2382).

### 3.2.6 S-Ethyl (4-hex-5-ynyloxy-benzyl)-[4-(2-methyl-[1,3]dioxolan-2-yl)-butyl]-thiocarbamate

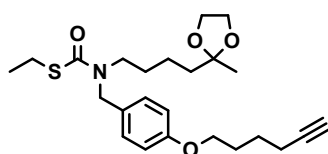

A solution of (4-hex-5-ynyloxy-benzyl)-[4-(2-methyl-[1,3]dioxolan-2-yl)-butyl]-amine (103 mg, 0.30 mmol) in dry DCM (10 mL) was cooled to 0 °C. DIPEA (160  $\mu$ L, 0.90 mmol) was added dropwise, followed by S-ethyl chlorothiolformate (80  $\mu$ L, 0.75 mmol). The solution was stirred

at 0 °C under nitrogen for 45 min. The reaction mixture was diluted with EtOAc and the organic layer washed with 1 M HCl, saturated sodium bicarbonate, and brine. The organic layer was dried over sodium sulphate, filtered and concentrated under vacuum. The crude residue was purified by automated silica chromatograph with a hexane/EtOAc gradient to yield a colourless oil (87 mg, 67%).  $^1\text{H}$  NMR:  $\delta_{\text{H}}$ /ppm (400 MHz,  $\text{CDCl}_3$ ) 7.18 (d,  $J$  = 8.5 Hz, 2H), 6.86 (d,  $J$  = 8.1 Hz, 2H), 4.52 (br d,  $J$  = 23.5 Hz, 2H), 3.99 (t,  $J$  = 6.2 Hz, 2H), 3.91 (m, 4H), 3.27 (br d,  $J$  = 32.7 Hz, 2H), 2.96 (q,  $J$  = 7.4 Hz, 2H), 2.30 (td,  $J$  = 2.6, 7.0 Hz, 2H), 1.99 (t,  $J$  = 2.6 Hz, 1H), 1.92 (m, 2H), 1.64 (m, 2H), 1.65 (m, 2H), 1.55 (m, 2H), 1.38 (m, 2H), 1.34 (t,  $J$  = 7.4 Hz, 3H), 1.31 (s, 3H).  $^{13}\text{C}$  NMR:  $\delta_{\text{C}}$ /ppm (101 MHz,  $\text{CDCl}_3$ ) 168.5, 158.5, 129.3, 128.6, 114.5, 110.0, 84.1, 68.7, 67.3, 64.7, 50.7, 50.6, 49.3, 49.2, 47.0, 46.8, 46.7, 38.8, 28.3, 27.89, 27.5, 25.0, 24.9, 23.8, 21.4, 18.2, 15.4. ES+ HRMS: found 434.2357 ( $\text{C}_{24}\text{H}_{36}\text{NO}_4\text{S}$ ,  $[\text{M}+\text{H}]^+$ , requires 434.2365).

### 3.2.7 S-Ethyl (4-hex-5-ynyloxy-benzyl)-(5-oxo-hexyl)-thiocarbamate

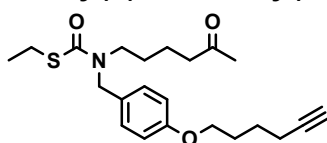

To a solution of S-Ethyl (4-hex-5-ynyloxy-benzyl)-[4-(2-methyl-[1,3]dioxolan-2-yl)-butyl]-thiocarbamate (86 mg, 0.20 mmol) in THF (5.0 mL) was added 2 M HCl (1.0 mL) dropwise. The solution was stirred at room temperature for 3 h, then diluted with EtOAc and washed with distilled water, saturated sodium bicarbonate and brine. The organic layer was dried over sodium sulfate, filtered and concentrated under vacuum. The crude residue was purified by automated silica chromatography, eluting in a gradient of hexane/EtOAc to yield a colourless oil (67 mg, 85%).  $^1\text{H}$  NMR:  $\delta_{\text{H}}$ /ppm (400 MHz,  $\text{CDCl}_3$ ) 7.17 (d,  $J$  = 8.5 Hz, 2H), 6.86 (d,  $J$  = 8.2 Hz, 2H), 4.52 (br d,  $J$  = 18.8 Hz, 2H), 3.99 (t,  $J$  = 6.2 Hz, 2H), 3.27 (br d,  $J$  = 30.8 Hz, 2H), 2.96 (q,  $J$  = 7.4 Hz, 2H), 2.45 (t,  $J$  = 6.7 Hz, 2H), 2.29 (td,  $J$  = 2.6, 7.0 Hz, 2H), 2.14 (s, 3H), 1.99 (t,  $J$  = 2.6 Hz, 1H), 1.92 (m, 2H), 1.74 (m, 2H), 1.54 (br s, 4H), 1.32 (t,  $J$  = 7.4 Hz, 3H).  $^{13}\text{C}$  NMR:  $\delta_{\text{C}}$ /ppm (101 MHz,  $\text{CDCl}_3$ ) 168.4, 158.5, 129.3, 129.0, 128.6, 114.6, 84.1, 68.7, 67.3, 50.7, 49.3, 49.2, 46.6, 46.5, 46.4, 46.2, 46.2, 43.0, 30.0, 28.3, 27.2, 26.9, 26.8, 26.7, 25.0, 24.9, 20.8, 18.2, 15.4. ES+ HRMS: found 390.2094 ( $\text{C}_{22}\text{H}_{32}\text{NO}_3\text{S}$ ,  $[\text{M}+\text{H}]^+$ , requires 390.2103).

### 3.2.8 S-Ethyl(4-hex-5-ynyloxy-benzyl)-(5-oxo-hexyl)-thiocarbamatesulfoxide (1)

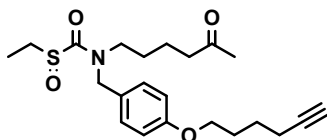

A solution of S-ethyl(4-hex-5-ynyloxy-benzyl)-(5-oxo-hexyl)-thiocarbamate (66 mg, 0.17 mmol) in DCM (2.0 mL) was cooled to -78 °C and 3-chloroperbenzoic acid (37 mg, 0.16 mmol) in DCM (1.0 mL) was added dropwise. The reaction stirred at -78 °C for 50 min. The solvent was removed under vacuum and the solid residue taken up in EtOAc, and washed with saturated sodium bicarbonate and brine. The organic layer was dried over sodium sulphate, filtered and concentrated under vacuum. The crude residue was purified by automated column chromatography, eluting in a gradient of hexane/EtOAc to yield **1** as a colourless oil (48 mg, 69%).  $^1\text{H}$  NMR:  $\delta_{\text{H}}$ /ppm (400 MHz,  $\text{CDCl}_3$ ) 7.5 – 7.25 (m, 2H), 6.83 – 6.95 (m, 2H), 4.48 – 4.86 (m, 2H), 4.00 (td,  $J$  = 6.2, 2.2 Hz, 2H), 3.29 – 3.62 (m, 2H), 2.90 –

3.14 (m, 2H), 2.2 – 2.52 (m, 2H), 2.30 (td,  $J = 7.0, 2.6$  Hz, 2H), 2.15 (d,  $J = 3.7$  Hz, 3H), 2.00 (t,  $J = 2.7$  Hz, 1H), 1.88 – 1.97 (m, 2H), 1.70 – 1.81 (m, 2H), 1.48 – 1.70 (m, 4H), 1.40 (td,  $J = 7.5, 3.2$  Hz, 3H).  $^{13}\text{C}$  NMR:  $\delta_{\text{C}}/\text{ppm}$  (101 MHz,  $\text{CDCl}_3$ ) 208.3, 208.1, 168.5, 168.4, 159.1, 158.9, 129.9, 128.9, 127.5, 126.8, 114.9, 114.8, 84.0, 77.4, 77.0, 76.7, 68.7, 67.4, 67.4, 50.3, 48.7, 47.2, 45.5, 45.4, 44.7, 42.7, 42.6, 30.0, 28.2, 28.1, 26.1, 25.0, 20.6, 20.4, 18.2, 7.0, 7.0. ES+ HRMS: found 428.1856 ( $\text{C}_{22}\text{H}_{31}\text{NO}_4\text{SNa}$ ,  $[\text{M}+\text{Na}]^+$ , requires 428.1872).

### 3.3 Synthesis of Probe 2

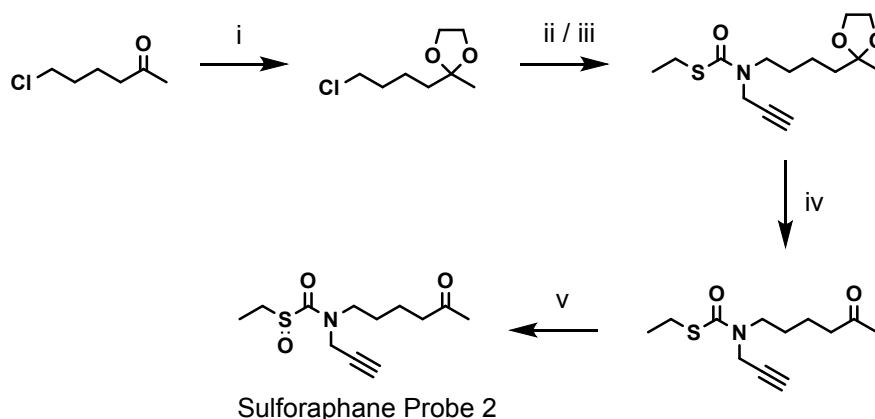

Scheme S2. Synthesis of Probe 2. Reagents and conditions: i) *p*-toluenesulfonic acid, ethylene glycol, toluene, 135 °C; ii) propargyl amine,  $\text{K}_2\text{CO}_3$ , KI, DMF; iii) DIPEA, *S*-ethyl chlorothiolformate, DCM, 0 °C; iv) 2 M HCl, THF; v) *m*-CPBA, DCM, -78 °C.

#### 3.3.1 *S*-Ethyl (prop-2-ynyl)-[4-(2-methyl-[1,3]dioxolan-2-yl)-butyl]-thiocarbamate

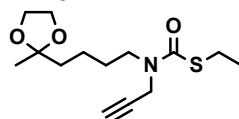

To a suspension of propargyl amine (170  $\mu\text{L}$ , 2.6 mmol),  $\text{K}_2\text{CO}_3$  (304 mg, 2.2 mmol) and potassium iodide (308 mg, 1.9 mmol) in DMF (6 mL) was added a solution of 2-(4-chlorobutyl)-2-methyl-[1,3]dioxolane (303 mg, 1.7 mmol) in DMF (1 mL). The orange suspension was stirred at 70 °C overnight and at room temperature for a further 48 h then diluted with EtOAc and washed with brine. The organic layer was dried over sodium sulfate, filtered and concentrated under vacuum to yield a brown oil which was dissolved in DCM (10 mL) and cooled to 0 °C. DIPEA (890  $\mu\text{L}$ , 5.1 mmol) was added dropwise, followed by *S*-ethyl chlorothiolformate (420  $\mu\text{L}$ , 4.0 mmol) and the solution stirred at 0 °C for 2 h. The solution was diluted with DCM and washed with 1 M HCl, saturated sodium bicarbonate, and brine. The organic layer was dried over magnesium sulphate, filtered and concentrated under vacuum to yield an orange liquid which was purified by automated silica chromatography eluting in a gradient of hexane/EtOAc to yield a yellow oil (184 mg, 38%).  $^1\text{H}$  NMR:  $\delta_{\text{H}}/\text{ppm}$  (400 MHz,  $\text{CDCl}_3$ ) 4.19 (s, 2H), 3.93 (m, 4H), 3.43 (t,  $J = 7.3$  Hz, 2H), 2.92 (q,  $J = 7.3$  Hz, 2H), 2.23 (s, 1H), 1.65 (m, 4H), 1.42 (m, 2H), 1.28 (m, 6H).  $^{13}\text{C}$  NMR:  $\delta_{\text{C}}/\text{ppm}$  (101 MHz,  $\text{CDCl}_3$ ) 110.0, 64.8, 47.4, 38.9, 28.0, 25.0, 23.9, 21.4, 15.4. ES+ HRMS: found 286.1478 ( $\text{C}_{14}\text{H}_{24}\text{NO}_3\text{S}$ ,  $[\text{M}+\text{H}]^+$ , requires 286.1477).

### 3.3.2 S-Ethyl (prop-2-ynyl)-(5-oxo-hexyl)-thiocarbamate

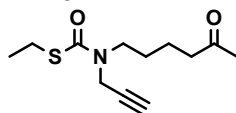

To a solution of S-ethyl-(prop-2-ynyl)-[4-(2-methyl-[1,3]dioxolan-2-yl)-butyl]-thiocarbamate (180 mg, 0.63 mmol) in THF (10.4 mL) was added 2 M HCl (2.6 mL) dropwise. The colourless solution was stirred at room temperature for 3 h, then diluted with EtOAc and washed with distilled water, saturated sodium bicarbonate and brine. The organic layer was dried over sodium sulphate, filtered and concentrated under vacuum. The crude residue was purified by automated silica chromatography eluting in a gradient of hexane/EtOAc to yield a colourless oil (87 mg, 68%).  $^1\text{H}$  NMR:  $\delta_{\text{H}}$ /ppm (400 MHz,  $\text{CDCl}_3$ ) 4.18 (s, 2H), 3.44 (s, 2H), 2.92 (q,  $J = 7.4$  Hz, 2H), 2.48 (t,  $J = 6.7$  Hz, 2H), 2.25 (s, 1H), 2.14 (s, 3H), 1.60 (m, 4H), 1.28 (t,  $J = 7.4$  Hz, 3H).  $^{13}\text{C}$  NMR:  $\delta_{\text{C}}$ /ppm (101 MHz,  $\text{CDCl}_3$ ) 208.4, 208.4, 168.4, 78.5, 72.2, 47.0, 43.0, 30.0, 27.2, 25.0, 20.7, 15.2. ES+ HRMS: found 242.1203 ( $\text{C}_{12}\text{H}_{20}\text{NO}_2\text{S}$ ,  $[\text{M}+\text{H}]^+$ , requires 242.1215).

### 3.3.3 S-Ethyl (prop-2-ynyl)-(5-oxo-hexyl)-thiocarbamate sulfoxide (2)

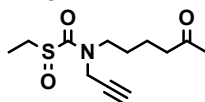

A solution of S-ethyl-(prop-2-ynyl)-(5-oxo-hexyl)-thiocarbamate (74 mg, 0.31 mmol) in DCM (2.5 mL) was cooled to  $-78^\circ\text{C}$  and 3-chloroperbenzoic acid (68 mg, 0.30 mmol) in DCM (1.5 mL) was added dropwise. The reaction was stirred at  $-78^\circ\text{C}$  for 50 min. The solvent was removed under vacuum and the solid residue taken up in EtOAc, washed with saturated sodium bicarbonate and brine. The organic layer was dried over sodium sulphate, filtered and concentrated under vacuum. The crude residue was purified by automated silica chromatography eluting in a gradient of hexane/EtOAc, to yield **2** as a colourless oil (12 mg, 15%).  $^1\text{H}$  NMR:  $\delta_{\text{H}}$ /ppm (400 MHz,  $\text{CDCl}_3$ ) 4.53 (qd,  $J = 2.5, 18.3$  Hz, 1H), 4.24 (m, 1H), 3.82 (m, 0.5H), 3.67 (dd,  $J = 7.2, 14.6$  Hz, 0.5H), 3.54 (td,  $J = 3.1, 7.0$  Hz, 1H), 3.07 (m, 2H), 2.50 (q,  $J = 6.5$  Hz, 2H), 2.34 (dt,  $J = 2.5, 24.1$  Hz, 1H), 2.14 (d,  $J = 2.3$  Hz, 3H), 1.63 (m, 5H), 1.39 (dt,  $J = 2.5, 8.9$  Hz, 3H).  $^{13}\text{C}$  NMR:  $\delta_{\text{C}}$ /ppm (101 MHz,  $\text{CDCl}_3$ ) 208.3, 168.2, 73.9, 73.5, 48.2, 45.8, 45.7, 45.4, 42.7, 42.6, 36.7, 35.2, 30.0, 27.9, 26.1, 20.5, 20.3, 7.0, 6.9. ES+ HRMS: found 280.0977 ( $\text{C}_{12}\text{H}_{20}\text{NO}_3\text{S}$ ,  $[\text{M}+\text{Na}]^+$ , requires 280.0983).

### 3.4 $^1\text{H}$ NMR, $^{13}\text{C}$ NMR, HRMS and LC-MS data

Data for **1** are shown below:

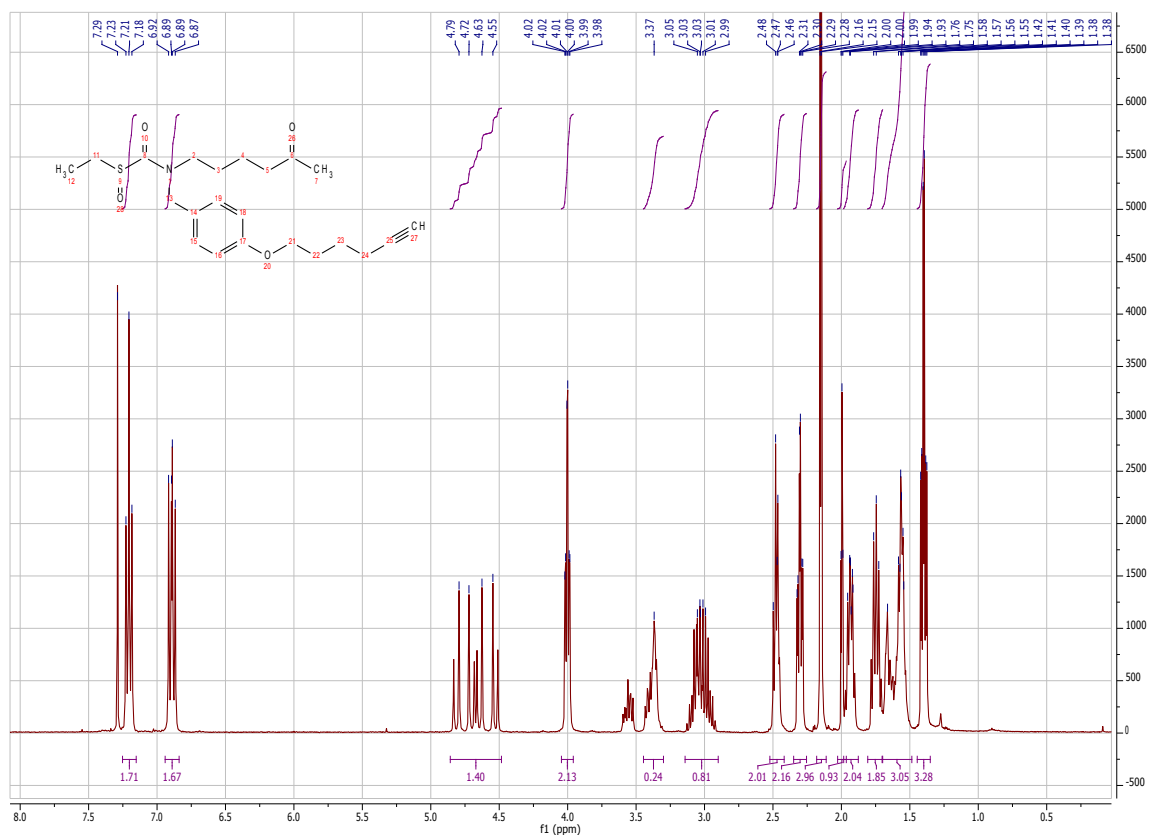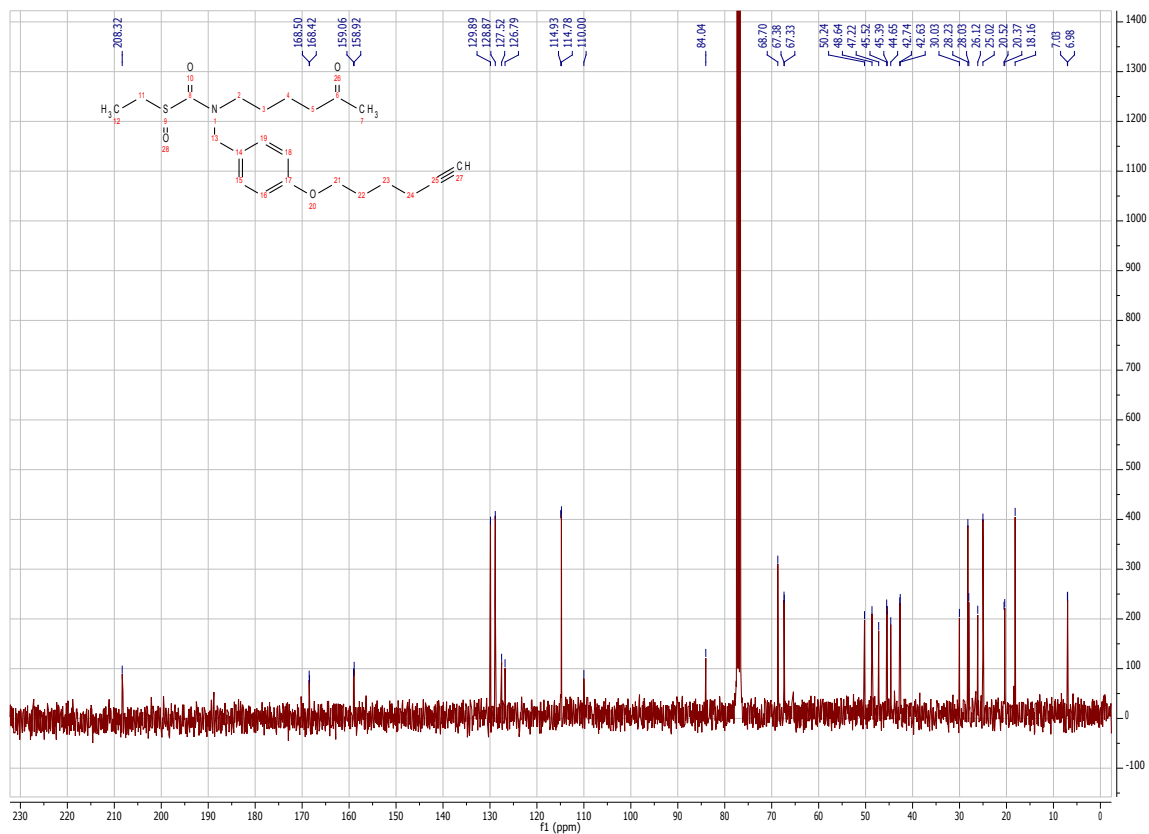

(A)

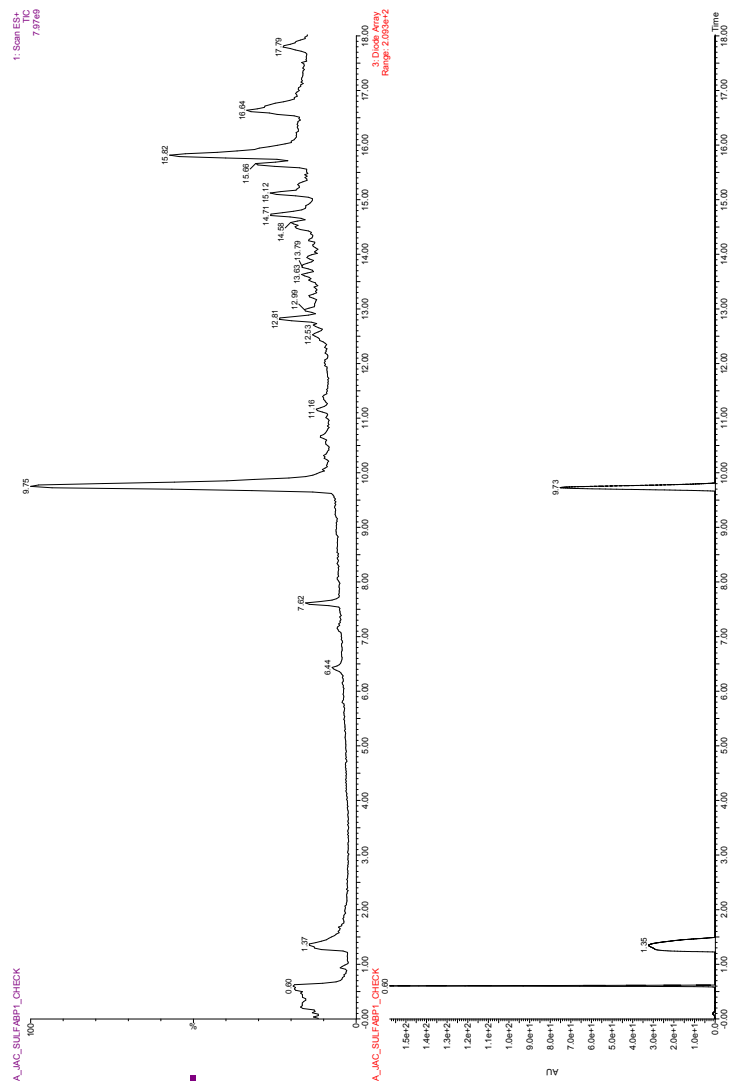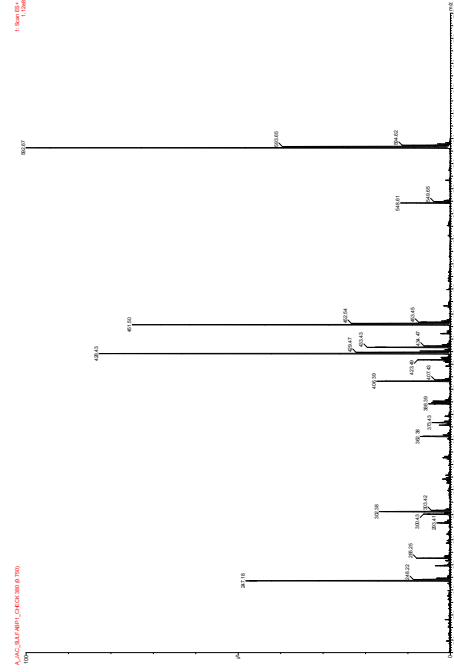

Dec17-2013  
JAC078-F13+14

Chemical structure of compound 13 is shown in the top left. The structure is a complex molecule with a central nitrogen atom bonded to a carbonyl group, a methoxy group, and a side chain containing a terminal alkyne group. The structure is labeled with atom numbers 1 through 17.

<sup>1</sup>H NMR spectrum (400 MHz, CDCl<sub>3</sub>) of compound 13. The spectrum shows peaks from 0.0 to 7.5 ppm. Key peaks are labeled: A (dd, 4.53), B (dd, 4.25), E (d, 3.54), F (m, 3.06), G (q, 2.50), H (d, 2.14), I (m, 1.64), and J (dt, 1.39). Integration values are shown below the peaks: 1.54, 1.22, 1.05, 3.41, 4.12, 1.87, 5.57, 9.11, and 6.27.

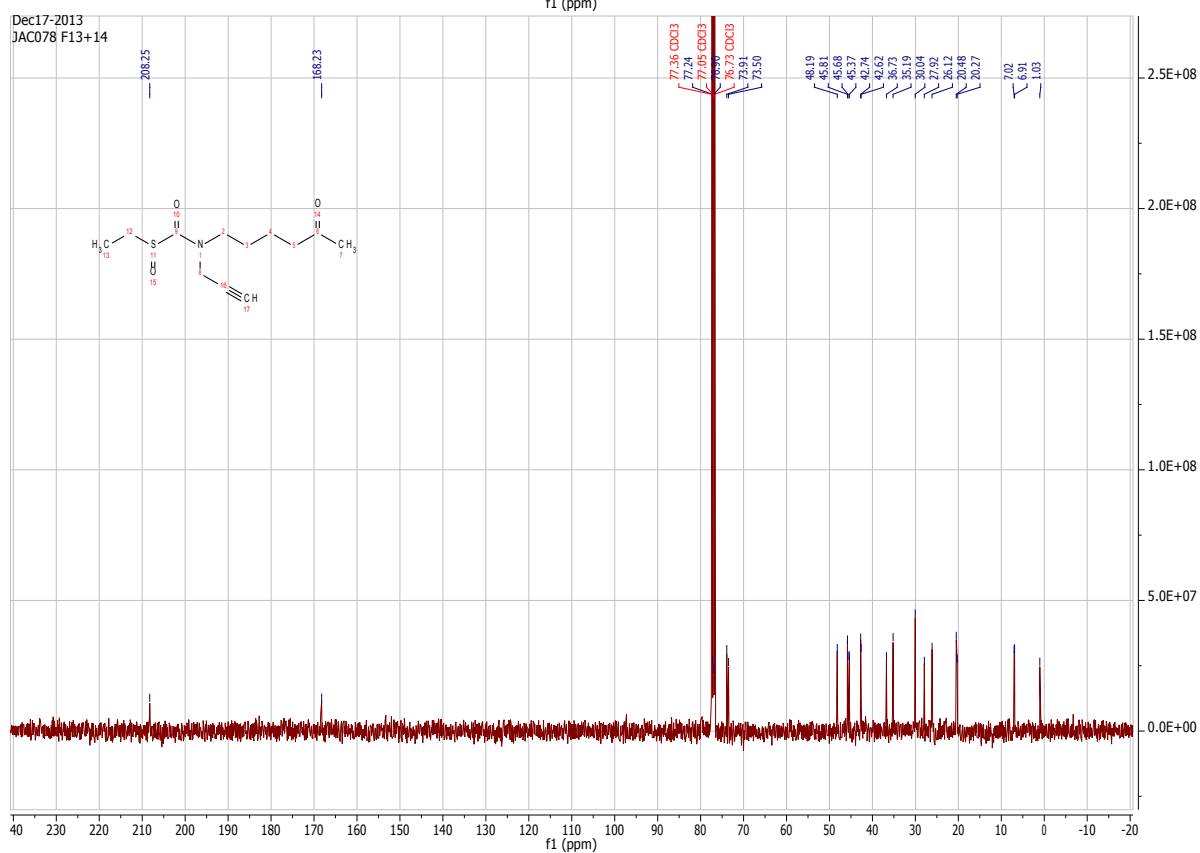

(B)

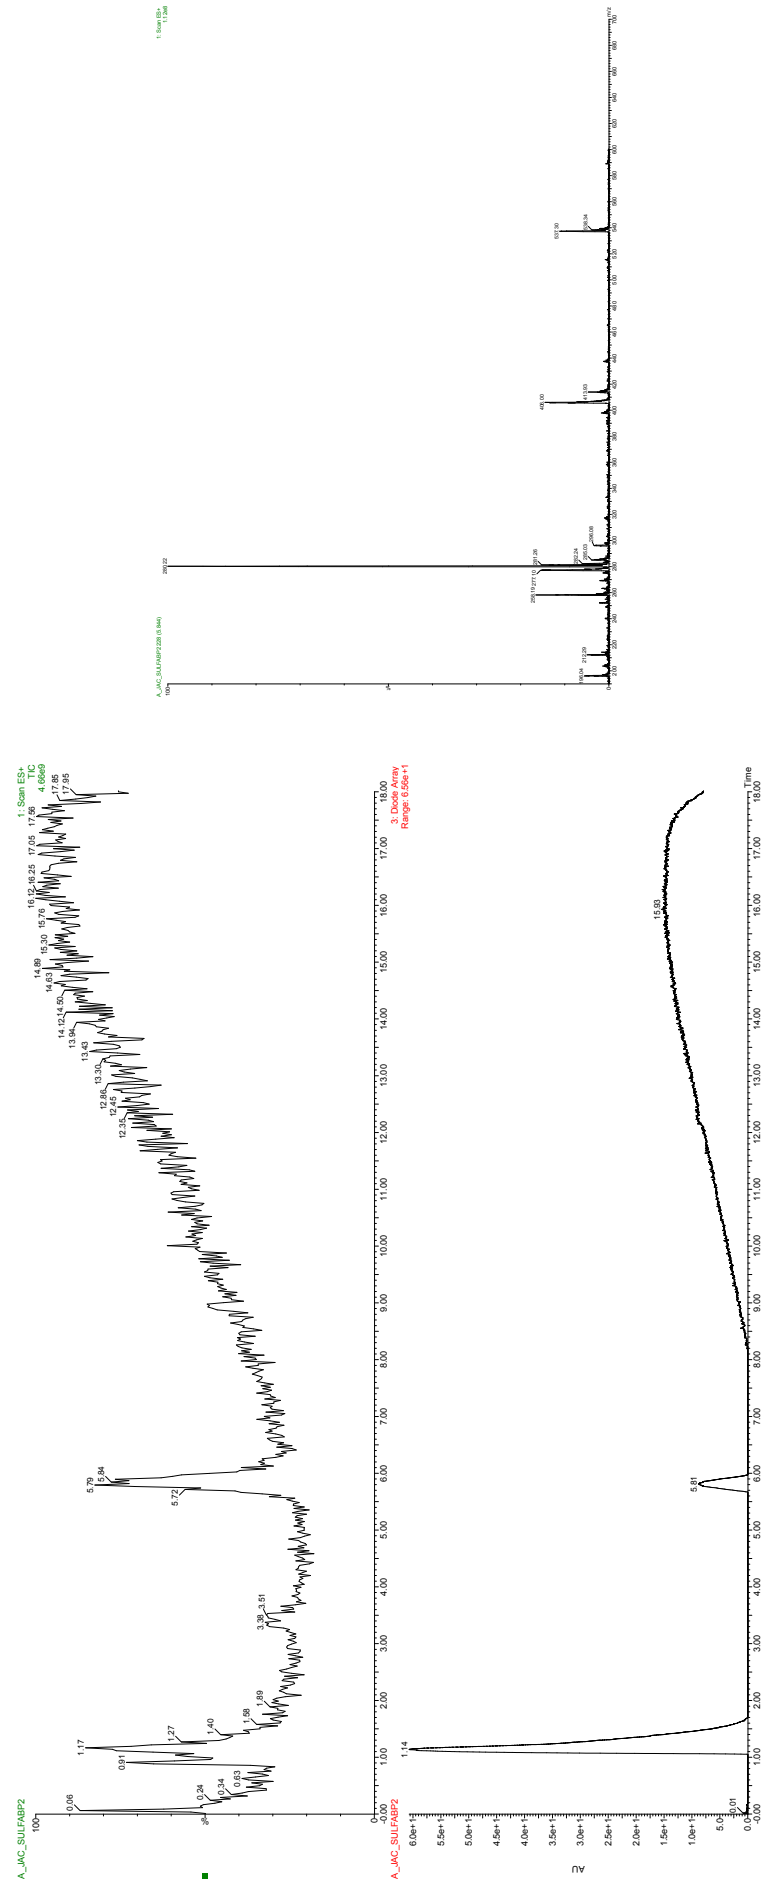

## **4 Biological and biochemical methods**

### **4.1 General methods**

Ultrapure water was obtained using a MilliQ® Millipore purification system. In-gel fluorescence was recorded using an ETTAN DIGE Imager (GE Healthcare) and chemiluminescence was recorded using a LAS-4000 Imaging System (GE Healthcare). Absorbance in 96-well plates was measured using a SpectraMax M2e Microplate Reader (Molecular Devices). Protein concentration was determined using the BioRad DC Protein Assay following the manufacturer's instructions, measuring absorbance at 750 nm, using BSA as a protein standard.

All biological and chemical reagents were purchased from Sigma-Aldrich unless otherwise specified. *N*-ethylmaleimide (NEM), iodoacetamide (IA), and D,L-sulforaphane (Toronto Research Chemicals, Canada) were purchased and used without further purification. All compounds were prepared as DMSO stocks for biological experiments unless otherwise stated, stored at -20 °C and thawed on the day of use, except for IA that was prepared fresh on the day of use.

### **4.2 Cell culture**

MDA-MB-231 and MCF7 cell lines were obtained from CRUK cell services core facility and were cultured in DMEM supplemented with 10% (v/v) FBS, incubated at 37 °C in a 10% CO<sub>2</sub> humidified incubator. Cells were grown in 10 cm or 6 cm cell culture plates (Falcon or Corning). Cells were detached with trypsin (0.2%) during passaging. Quantitative proteomics 'spike-in' samples were grown in R10K8 DMEM media (Dundee Cell Products) supplemented with 10% (v/v) dialysed FBS for > 7 passages to ensure incorporation of the R10K8 label before proceeding to further experiments. Incorporation of R10K8 labelling was determined to be > 97% by mass spectrometry in accordance with guidelines for SILAC-based applications.<sup>5</sup> For R10K8 labelled cells, enzyme-free, PBS-based cell dissociation buffer (Gibco Life technologies) was used instead of trypsin for cell detachment during passaging. All described experiments were carried out with cells at low passage number (< 25) and which were generally plated 24 or 48 h prior to treatment. All cells were grown to 70-90% confluence prior to commencing an experiment.

### **4.3 In-cell competition-based assays for in-gel fluorescence and Western Blot analyses**

#### **4.3.1 Compound treatment of cells and cell lysis**

Cells were incubated with D,L-sulforaphane or competition compounds at a fixed concentration in the cell media for 30 min (0.2% DMSO final). Media was then aspirated and replaced with fresh media containing fixed concentrations of D,L-sulforaphane or competition compounds and **1** or **2** (0.2% DMSO final). Cells were incubated for a further 30 min, after which the media was aspirated, cells washed three times with PBS, and lysed on the plate with whole cell lysis buffer (1% NP-40, 1% sodium deoxycholate, 0.1% SDS, 150 mM NaCl, PBS pH 7.6, 1 x Complete EDTA-free protease inhibitor (Roche Diagnostics)). The lysates were transferred to microcentrifuge tubes and incubated on ice for 15 min, followed by centrifugation (17,000 × g, 20 min, 4 °C) to remove insoluble cellular debris. Lysates were stored at -20 °C until further use.

#### **4.3.2 Copper catalysed azide-alkyne cycloaddition (CuAAC)**

Protein lysates were thawed on ice and made up to 100  $\mu$ L at a concentration of 1 mg/mL with lysis buffer. A click reaction master mix was prepared freshly as follows: capture reagent (either AzT or AzTB, 1  $\mu$ L, 10 mM DMSO stock concentration; 0.1 mM final concentration), CuSO<sub>4</sub> (2  $\mu$ L, 50 mM stock concentration; 1 mM final concentration), TCEP (2  $\mu$ L, 50 mM stock concentration; 1 mM final concentration) and TBTA (1  $\mu$ L, 10 mM DMSO stock concentration; 0.1 mM final concentration). 6  $\mu$ L of this master mix was added to each sample and the sample vortexed for 1 h at room temperature. The reaction was quenched by addition of EDTA (final concentration 10 mM) and proteins precipitated by addition of methanol (4 vol.), chloroform (1 vol.) and water (3 vol.), followed by centrifugation (17,000  $\times$  g, 2 min). The upper liquid phase was discarded before addition of methanol (4 vol.) and centrifugation (17,000  $\times$  g, 2 min). The resulting protein pellet was washed twice with methanol (8 vol.) and air dried for 10 min.

#### **4.3.3 Gel electrophoresis and in-gel fluorescence**

For in-gel fluorescence analysis, the protein pellet was re-suspended in 2% SDS in PBS (10  $\mu$ L), 100 mM EDTA (10  $\mu$ L), PBS (40  $\mu$ L) and 4  $\times$  NuPAGE® LDS sample loading buffer containing 5% (v/v) 2-mercaptoethanol (20  $\mu$ L) to give a final concentration of protein of 1.25 mg/mL. Samples were then heated at 90 °C for 5 min. SDS-PAGE analysis was performed with 12% acrylamide Bis-Tris gels, using a BioRad Mini-PROTEAN® Tetra Cell system with MOPS running buffer (50 mM MOPS pH 7.7, 50 mM Tris Base, 0.1% SDS, 1 mM EDTA), with Precision Plus Protein All Blue Standard (BioRad) used as molecular weight marker. Gels were fixed in gel soaking solution (50% water, 40% MeOH, 10% acetic acid) for 30 min and washed twice with MilliQ water before in-gel fluorescence visualisation (excitation wavelength 552 nm, emission wavelength 570 nm). Further data analysis was performed with ImageQuant™ TL software. In-gel protein levels were determined by Coomassie staining (9.2% phosphoric acid, 10% ammonium sulfate, 0.12% Coomassie brilliant blue G-250 dye, 20% methanol in water).

#### **4.3.4 Affinity enrichment and Western Blot analysis**

Protein lysates (0.6 mg) were prepared at a concentration of 2 mg/mL and functionalised with AzRB click reaction master mix (18  $\mu$ L) for 1 h before being quenched and protein precipitated as described previously. The protein pellet was re-suspended in 2% SDS in PBS (60  $\mu$ L), 100 mM EDTA (60  $\mu$ L), 100 mM DTT (6  $\mu$ L), 1  $\times$  Complete EDTA-free protease inhibitor, and PBS (324  $\mu$ L) to give a final volume 450  $\mu$ L. 75  $\mu$ L of the re-suspended protein pellet was then added to 4  $\times$  NuPAGE® LDS sample loading buffer containing 5% (v/v) 2-mercaptoethanol (25  $\mu$ L). Samples were heated at 90 °C for 5 min. These samples were designated as the pre-pull down lysate (L). To the remaining 375  $\mu$ L of lysate, PBS was added (75  $\mu$ L). Neutravidin sepharose resin (Thermo Scientific) was washed 3  $\times$  with 0.2% SDS in PBS before resin slurry (75  $\mu$ L) was added to each sample to give a final volume of 525  $\mu$ L at 1 mg/mL protein concentration (0.2% SDS final). Samples were then shaken at room temperature for 2 h. The supernatant was removed and a 75  $\mu$ L aliquot taken and added to 4  $\times$  NuPAGE® LDS sample loading buffer containing 5% (v/v) 2-mercaptoethanol (25  $\mu$ L). Samples were heated at 90 °C for 5 min. These samples were designated as the supernatant samples (SN). The Neutravidin sepharose resin from each sample was then washed with 4  $\times$  400  $\mu$ L 0.2% SDS in PBS. 2% SDS in PBS (75  $\mu$ L) was then added to each sample which were heated at 90 °C for 15 min. 4  $\times$  NuPAGE® LDS sample loading buffer containing 5% (v/v) 2-mercaptoethanol (25  $\mu$ L) was added and the samples heated at 90 °C

for a further 5 min. These samples were designated as the pull-down samples (PD). Samples were then loaded onto SDS-PAGE gels for analysis; L 12  $\mu$ L (10  $\mu$ g protein), SN 15  $\mu$ L (10  $\mu$ g protein) and PD 15  $\mu$ L.

After electrophoresis, proteins were transferred from non-fixed gels to PVDF membranes using an iBlot® Gel Transfer Device (Invitrogen, Life Technologies) according to the manufacturer's guidelines. After transfer, membranes were blocked in 5% (w/v) dried skimmed milk in TBS plus 0.1% (v/v) Tween-20 (TBST) for 2 h at room temperature and incubated with the appropriate primary antibody in blocking solution with gentle agitation overnight at 4 °C (anti-STAT3 (Santa Cruz Biotechnology, sc-482, rabbit polyclonal, dilution 1:100), anti-STAT1 p84/p91 (Santa Cruz Biotechnology, sc-346, rabbit polyclonal, dilution 1:100), anti- $\alpha$ -tubulin (Santa Cruz Biotechnology, sc-53646, mouse monoclonal, dilution 1:500) anti- $\beta$ -actin (Santa Cruz Biotechnology, sc-130656, rabbit polyclonal, dilution 1:500), HSP90 (Santa Cruz Biotechnology, sc-69703, mouse monoclonal, dilution 1:200), anti-CDK2 (Santa Cruz Biotechnology, sc-163, rabbit polyclonal, dilution 1:1,000), anti-BID (Cell Signaling Technology, 2002S, rabbit polyclonal, dilution 1:250), anti-MARCKS (Cell Signaling Technology, D88D11, rabbit monoclonal, dilution 1:500), anti-IMPDH2 (Abcam, Ab131158, rabbit monoclonal, dilution 1:1,000), anti-PSMC1 (Atlas, HPA000872, rabbit polyclonal, dilution 1:750), anti-GSTO1/2 (Santa Cruz Biotechnology, sc-166040, mouse monoclonal, dilution 1:100), and anti-HCCS (Atlas, HPA002946, rabbit polyclonal, dilution 1:500)). Membranes were then washed 3  $\times$  TBST before being incubated with the appropriate secondary antibody in blocking solution with gentle agitation for 2 h at room temperature (Goat anti-Rabbit IgG-HRP secondary antibody (Invitrogen, dilution 1:5,000) and Goat anti-Mouse IgG-HRP (BD Pharmingen, dilution 1:10,000)). Membranes were then washed with 3  $\times$  TBST before being developed with Luminata Crescendo Western HRP substrate (Millipore) according to the supplier's protocol.

#### **4.4 In-cell quantitative, competition-based assays for target identification by mass spectrometry**

The following method was used for MS-based proteomic identification of targets of **2** competed against a concentration gradient of sulforaphane in live, intact MCF7 and MDA-MB-231 cells. All experimental samples were generated in duplicate. The amount of peptide injected onto the LC-MS/MS for affinity purified peptide digests was equivalent to 20-40  $\mu$ g of the starting protein lysate.

##### **4.4.1 Compound treatment of cells and cell lysis**

MDA-MB-231 and MCF7 cells were grown in 10 cm plates under standard cell culture conditions. Cells were incubated with D,L-sulforaphane (0  $\mu$ M, 5  $\mu$ M, 25  $\mu$ M or 100  $\mu$ M) in cell media (0.2% DMSO final) for 30 min. The media was aspirated and replaced with fresh media (0.2% DMSO final) containing D,L-sulforaphane and **2** (5  $\mu$ M) for 30 min. The media was aspirated and the cells washed three times with PBS. Cells were then lysed using a fractionation protocol as described. Cells were lifted from the plate into PBS using a cell scraper and transferred to low protein binding tubes (ProteinLoBind tubes, Eppendorf). Cells were pelleted by centrifugation (2000  $\times$  g, 5 min). The supernatant was discarded and the cell pellet re-suspended in Buffer A (400  $\mu$ L, 5 mM KCl, 0.5 mM MgCl<sub>2</sub>, 0.5% NP-40, 25 mM HEPES pH 7.9, 1  $\times$  Complete EDTA-free protease inhibitor) and shaken at 4 °C for 15 min. Samples were then centrifuged (600  $\times$  g, 2 min) and the supernatant (cytosolic fraction) transferred to a new tube. The pellet was then washed with Buffer A (100  $\mu$ L) then incubated with Buffer B (200  $\mu$ L, 350 mM NaCl, 10% sucrose, 25 mM HEPES pH 7.9, 1  $\times$  Complete

EDTA-free protease inhibitor) for 1 h at 4 °C. The sample was then centrifuged (17,000 × g, 10 min, 4 °C) and the supernatant (nuclear fraction) transferred to a new tube. Protein concentration was determined for the cytosolic and nuclear fraction for each sample.

#### **4.4.2 Preparation of 'spike-in' SILAC cell lysates as quantification standards**

To generate 'spike-in' SILAC 'heavy' lysates, 8 × 10 cm plates of MDA-MB-231 cells and 9 × 10 cm plates of MCF7 cells previously established with R10K8 labelled proteomes were grown in 'heavy' media to 90% confluence. These cells were then treated with **2** (20 µM) for 30 min in 'heavy' media (0.2% DMSO final). Media was aspirated and cells washed three times with PBS prior to lysis as described previously to generate cytosolic and nuclear fractions. Lysates from the two fractions were pooled into a single master 'spike-in' SILAC 'heavy' lysate for each of the cytosolic and nuclear fractions for which the protein concentration was determined. A total protein amount for the master 'spike-in' SILAC lysate of 1.8 mg (nuclear) and 8.2 mg (cytosolic) for the MCF7 cell line and 1.6 mg (nuclear) and 6.4 mg (cytosolic) for the MDA-MB-231 cell line were generated.

#### **4.4.3 CuAAC, affinity enrichment and on-bead reduction, alkylation and trypsin digest**

Cytosolic fraction lysates (300 µL, 2 mg/mL) had added to them cytosolic master 'spike-in' SILAC lysate (100 µL, 2 mg/mL). Nuclear fraction lysates (90 µL, 1 mg/mL) had added to them nuclear master 'spike-in' SILAC lysate (30 µL, 1 mg/mL). Lysates were then subjected to CuAAC functionalisation with click reaction master mix containing azide capture reagent (24 µL for cytosolic lysates, 7.2 µL for nuclear lysates). Lysates were left to shake at room temperature for 1 h before being quenched and the protein precipitated.

The protein pellet was then re-suspended in 2% SDS in PBS (80 µL), 100 mM EDTA (80 µL), 100 mM DTT (8 µL), 1 × Complete EDTA-free protease inhibitor, and PBS (507 µL) (final volume 675 µL) for the cytosolic samples, and in 2% SDS in PBS (12 µL), 100 mM EDTA (12 µL), 100 mM DTT (1.2 µL), 1 × Complete EDTA-free protease inhibitor, and PBS (74.8 µL) (final volume 100 µL) for the nuclear samples. Samples were centrifuged (17,000 × g, 3 min) after re-suspension and transferred to new tubes. Neutravidin sepharose resin was washed with 3 × 0.2% SDS in PBS and to cytosolic samples resin slurry (125 µL) was added (800 µL volume, protein concentration 1 mg/mL, 0.2% SDS final), and to nuclear samples resin slurry (20 µL) was added (120 µL volume, protein concentration 1 mg/mL, 0.2% SDS final). Samples were shaken at room temperature for 2 h, the supernatant discarded and the Neutravidin sepharose resin washed 3 × 1% SDS in PBS, 2 × 4 M urea in 50 mM ammonium bicarbonate (AMBIC) and 4 × 50 mM AMBIC (5 vol. for each wash consisting of 2 min vortexing followed by brief centrifugation to pellet the resin and discard washings).

After washing, proteins on the Neutravidin sepharose resin were reduced with 100 mM DTT in 50 mM AMBIC (4 µL for cytosolic samples, 1.2 µL for nuclear samples) at 55 °C for 30 min with gentle agitation. The resin was washed 2 × 50 mM AMBIC. Cysteines were then alkylated with 100 mM iodoacetamide in 50 mM AMBIC (4 µL for cytosolic samples, 1.2 µL for nuclear samples) in the dark at room temperature. The resin was then washed 2 × 50 mM AMBIC. Samples were then digested with Trypsin (Sequencing Grade Modified Trypsin (Promega), 0.5 µg for cytosolic samples, 0.25 µg for nuclear samples) at 37 °C overnight with gentle agitation. Samples were then centrifuged and the supernatant transferred to a new tube. The resin was washed with 0.1% formic acid in water and centrifuged and this

supernatant added to the same tube. The peptide solutions were then stage-tipped according to a published protocol.<sup>6</sup> Briefly, stage tips were prepared by fitting C18 Empore disks (SDC-XC, 3M) into 200  $\mu$ L pipette tips. The stage tip was initially washed by centrifuging ( $2000 \times g$ , 2 min) with MeOH (150  $\mu$ L) followed by water (150  $\mu$ L). Peptide solutions were then added to the top of the stage tip and centrifuged ( $2000 \times g$ , 2 min) to load the peptides onto the C18 sorbent followed by desalting by washing with water (150  $\mu$ L). Peptides were eluted with 79% acetonitrile in water and dried with speed-vac-assisted solvent removal. Peptides were then re-dissolved in 0.5% TFA, 2% acetonitrile in water and transferred to LC-MS sample vials for LC-MS/MS analysis.

#### 4.4.4 LC-MS/MS

LC-MS/MS analysis was performed on an Easy nLC-1000 system coupled to a Q Exactive mass spectrometer via an easy-spray source (Thermo Fisher Scientific). Tryptic peptide samples were separated with a reverse phase Acclaim PepMap RSLC column 50 cm  $\times$  75  $\mu$ m inner diameter (Thermo Fisher Scientific) using a 2 h acetonitrile gradient in 0.1% formic acid at a flow rate of 250 nL/min. The Q Exactive mass spectrometer was operated in data-dependent mode with survey scans acquired at a resolution of 75,000 at  $m/z$  200 (transient time 256 ms). Up to the top 10 most abundant isotope patterns with charge +2 from the survey scan were selected with an isolation window of 3.0  $m/z$  and fragmented by HCD with normalized collision energies of 25 W. The maximum ion injection times for the survey scan and the MS/MS scans (acquired with a resolution of 17,500 at  $m/z$  200) were 250 and 80 ms, respectively. The ion target value for MS was set to  $10^6$  and for MS/MS to  $10^5$ .

#### 4.4.5 LC-MS/MS data analysis

The mass spectrometry proteomics data have been deposited to the ProteomeXchange Consortium via the PRIDE<sup>7</sup> partner repository with the dataset identifier PXD006279. The .raw data file obtained from each LC-MS/MS acquisition was directly processed with the software MaxQuant version 1.3.0.5,<sup>8</sup> with the peptides being identified from the MS/MS spectra searched against the human UniProt+isoforms database (January 2014) using the Andromeda search engine. Cysteine carbamidomethylation (+57.021 Da) was set as a fixed modification and methionine oxidation (+15.995 Da) and N-terminal acetylation (+42.011 Da) set as variable modifications for the search. The multiplicity was set to 2 corresponding to the number of labels to quantify against one another (Lys0, Lys8, Arg0 and Arg10). The minimum length of a peptide was set to 7 residues, the maximum amount of missed trypsin cleavages was set to 2, the maximum number of modifications per peptide was set to 5 and the maximum charge of a peptide as +7. Peptide and protein FDRs were set to 0.01. Quantification of peptides was allowed off 'razor+unique' peptides carrying no modifications as well as methionine oxidation, N-terminal acetylation or carbamidomethylation. All other parameters were used as pre-set by the software.

Data outputted from MaxQuant was analysed using a combination of Perseus version 1.4.0.20, Microsoft Office Excel 2010 and GraphPad Prism 5.0. The corresponding data files from the two fractions (cytosolic and nuclear) of the same sample were combined to form a single file. Protein identifications by MaxQuant based on 'contaminants', 'only identified by site' and 'reverse' were filtered out. Further filtering only allowed identification of a protein target if it contained at least two 'razor+unique peptides' in both biological duplicates for each differing experimental condition. A two sample t-test ( $S_0 = 1$ , FDR = 0.01) was carried out across the replicates on the original H/L ratios between the 2 only sample and the 2 plus

sulforaphane competition samples to identify statistically significant differences. Medium-confidence targets were defined as those giving a statistically significant difference at any concentration of sulforaphane competition. High-confidence targets were defined as medium-confidence targets present at 5, 25 and 100  $\mu$ M, or 25 and 100  $\mu$ M sulforaphane competition.

The averaged H/L ratios for each concentration of competition against sulforaphane (5  $\mu$ M, 25  $\mu$ M and 100  $\mu$ M) were normalised to the H/L ratio of the **2** only sample to generate a QS for each concentration of competition against sulforaphane. To visualise competition across the sulforaphane concentration gradient against **2**, heat maps were generated in Perseus. The colour coding for the  $\log_2$ (quantification score) was defined as: Blue – 0, Green – 1.0, Yellow – 2.0, Red – 3.0, Grey – no value calculated. The quantification score for the three sulforaphane competition concentrations (5  $\mu$ M, 25  $\mu$ M and 100  $\mu$ M) from the MCF7 and MDA-MB-231 cell line for a select number of targets were then plotted against one another as depicted in Fig. 3. Where a protein was only present in one cell line, an arbitrary value of 0 was assigned as the quantification score for that protein ID for the purpose of the plot.

#### 4.4.6 Abundance and bioinformatic analysis

High-confidence target abundances were taken from iBAQ values for each cell line from proteomic analysis of the NCI-60 cell line panel.<sup>1</sup> To allow analysis of proteins that were not detected in a given cell line (iBAQ = 0), relative abundances were calculated using the following formula:

$$\text{Relative Abundance} = \frac{\text{Abundance}_{\text{MCF7}} - \text{Abundance}_{\text{average}}}{\text{Abundance}_{\text{average}}}$$

Targets that were not detected in MCF7 or MDA-MB-231 cell lines would give values of -1 or 1, respectively. Targets that were not detected in iBAQ measurements in either cell line were excluded from analysis.

High confidence targets of sulforaphane were analysed using Ingenuity® Pathway Analysis (Qiagen), inputting  $-\log_2(\text{QS})$  at each concentration to represent downregulation of protein function upon sulforaphane binding.

## 5 References

- 1 A. M. Gholami, H. Hahne, Z. Wu, F. J. Auer, C. Meng, M. Wilhelm and B. Kuster, *Cell Rep.*, 2013, **4**, 609–620.
- 2 W. P. Heal, M. H. Wright, E. Thinon and E. W. Tate, *Nat. Protoc.*, 2012, **7**, 105–117.
- 3 E. Thinon, R. A. Serwa, M. Broncel, J. A. Brannigan, U. Brassat, M. H. Wright, W. P. Heal, A. J. Wilkinson, D. J. Mann and E. W. Tate, *Nat. Commun.*, 2014, **5**, 4919.
- 4 M. Broncel, R. A. Serwa, P. Ciepla, E. Krause, M. J. Dallman, A. I. Magee and E. W. Tate, *Angew. Chem. Int. Ed Engl.*, 2015, **54**, 5948–5951.
- 5 S.-E. Ong and M. Mann, *Nat. Protoc.*, 2007, **1**, 2650–2660.
- 6 J. Rappsilber, Y. Ishihama and M. Mann, *Anal. Chem.*, 2003, **75**, 663–670.
- 7 J. A. Vizcaíno, A. Csordas, N. del-Toro, J. A. Dianes, J. Griss, I. Lavidas, G. Mayer, Y. Perez-Riverol, F. Reisinger, T. Ternent, Q.-W. Xu, R. Wang and H. Hermjakob, *Nucleic Acids Res.*, 2016, **44**, D447–D456.
- 8 J. Cox and M. Mann, *Nat. Biotechnol.*, 2008, **26**, 1367–1372.
