# Supplementary material for: Competition-based, quantitative chemical proteomics in breast cancer cells identifies new target profiles for sulforaphane
Source: Chem Commun (Camb). 2017 Apr 25;53(37):5182–5. doi: 10.1039/c6cc08797c (PMC6034444; doi:10.1039/c6cc08797c)
Supplement: Supplementary file 2 [file CC-053-C6CC08797C-s002.xlsx]

## Sheet: R10K8_MCF7
Table S1: Incorporation check of the R10K8 label in the 'spike-in' SILAC proteome for the MCF7 cell line
Reported below is the raw data file from the mass spectrometry-based proteomics experiment to check the incorporation of the R10K8 label within the proteome of the 'spike-in' SILAC lysate for the MCF7 cell line. The incorporation of the R10K8 label was confirmed to be > 98%.
					Average Intensity L	Average Intensity H		Protein lysate (50 μL at a protein concentration of 2 mg/mL) obtained from R10K8 proteome-labelled MCF7 cells was precipitated with ice-cold MeOH (8 vol.) overnight at -80 ˚C. The protein was pelleted by centrifugation at 17,000 x g for 10 min at 10 ˚C and subsequently washed twice with 10 % MilliQ water (in MeOH). The protein was air-dried for 2 min before being re-suspended in 80 μL 5 mM DTT in…
Average H/L	55.7353				1.00856e+06	6.84075e+07
1-1/(H/L Average)	0.982058			H/L ratio	67.827
x100	98.2058	% incorporation		1-1/(H/L Average)	0.985257
				x100	98.5257	% incorporation
(H/L Average)/(H/L Average+1)	0.982374
x100	98.2374	% incorporation
Sequence	Length	K Count	R Count	Modifications	Modified sequence	Oxidation (M) Probabilities	Oxidation (M) Score Diffs	Acetyl (Protein N-term)	Oxidation (M)	Proteins	Leading Proteins	Leading Razor Protein	Gene Names	Protein Names	Fasta headers	Type	Labeling State	Raw file	Experiment	MS/MS m/z	Charge	m/z	Mass	Resolution	Uncalibrated - Calibrated m/z [ppm]	Mass Error [ppm]	Uncalibrated Mass Error [ppm]	Max intensity m/z 0	Max intensity m/z 1	Retention time	B mixture	Retention Length	Calibrated Retention Time	Calibrated Retention Time Start	Calibrated Retention Time Finish	Retention Time Calibration	Match Time Difference	PIF	Fraction of total spectrum	Base peak fraction	PEP	MS/MS Count	MS/MS Scan Number	Score	Delta score	Combinatorics	Ratio H/L	Ratio H/L normalized	Ratio H/L shift
KVVPPSPMTDPTMLTDMMK	19	2	0	3 Oxidation (M)	_KVVPPSPMTDPTM(ox)LTDM(ox)M(ox)K_	KVVPPSPM(0.682)TDPTM(0.773)LTDM(0.773)M(0.773)K	KVVPPSPM(-1.46)TDPTM(1.46)LTDM(1.46)M(1.46)K	0	3	C9JLM9;Q9P0I2;Q9P0I2-2	C9JLM9	C9JLM9	TMEM111	Transmembrane protein 111	>tr|C9JLM9|C9JLM9_HUMAN ER membrane protein complex subunit 3 OS=Homo sapiens GN=EMC3 PE=1 SV=1;>sp|Q9P0I2|EMC3_HUMAN ER membrane protein complex subunit 3 OS=Homo sapiens GN=EMC3 PE=1 SV=3;>sp|Q9P0I2-2|EMC3_HUMAN Isoform 2 of ER membrane protein complex s	MULTI-SECPEP		JACB153_3	MCF7 R10K8	722.39	3	723.01	2166.01	40750.9	0.14805	0.050868	0.19892	723.344	728.686	77.523	29.841	1.042	77.523	77.136	78.178	0		0	0	0	0.080339	1	28712	1.4616	1.4616	4	0.04327	0.074538	0
FIADQLDHLNVTK	13	1	0	Unmodified	_FIADQLDHLNVTK_			0	0	Q9BQC6	Q9BQC6	Q9BQC6	MRP63	Ribosomal protein 63, mitochondrial	>sp|Q9BQC6|RT63_HUMAN Ribosomal protein 63, mitochondrial OS=Homo sapiens GN=MRPL57 PE=1 SV=1	MULTI-MSMS		JACB153_3	MCF7 R10K8	507.94	3	505.272	1512.79	49406.1	0.63306	0.86188	1.4949	505.272	507.943	43.524	18.512	0.91409	43.524	43.196	44.11	0		0	0	0	0.00019408	1	15658	97.69	79.232	1	0.16	0.045871	0
SANSELGGIWSVGQR	15	0	1	Unmodified	_SANSELGGIWSVGQR_			0	0	Q99627;E9PGT6;Q99627-2;B8ZZP3	Q99627	Q99627	COPS8	COP9 signalosome complex subunit 8	>sp|Q99627|CSN8_HUMAN COP9 signalosome complex subunit 8 OS=Homo sapiens GN=COPS8 PE=1 SV=1;>tr|E9PGT6|E9PGT6_HUMAN COP9 signalosome complex subunit 8 OS=Homo sapiens GN=COPS8 PE=1 SV=1;>sp|Q99627-2|CSN8_HUMAN Isoform 2 of COP9 signalosome complex subunit	MULTI-MSMS		JACB153_3	MCF7 R10K8	785.9	2	780.892	1559.77	39329.7	-0.39334	-0.79631	-1.1896	780.893	785.896	49.796	20.598	0.62617	49.796	49.41	50.036	0		0	0	0	1.6527e-05	1	18236	106.19	93.05	1	0.23169	0.08854	0
HSQFIGYPITLFVEK	15	1	0	Unmodified	_HSQFIGYPITLFVEK_			0	0	P07900-2;P07900;Q86U12;Q58FG0;G3V2J8	P07900-2	P07900-2	HSP90AA1;HSP90AA5P	Heat shock protein HSP 90-alpha;Putative heat shock protein HSP 90-alpha A5	>sp|P07900-2|HS90A_HUMAN Isoform 2 of Heat shock protein HSP 90-alpha OS=Homo sapiens GN=HSP90AA1;>sp|P07900|HS90A_HUMAN Heat shock protein HSP 90-alpha OS=Homo sapiens GN=HSP90AA1 PE=1 SV=5;>tr|Q86U12|Q86U12_HUMAN Full-length cDNA clone CS0CAP007YF18 of T	MULTI-MSMS		JACB153_3	MCF7 R10K8	894.49	2	889.977	1777.94	37422.9	-0.69443	-0.69887	-1.3933	889.977	893.985	61.193	24.403	0.79071	61.193	60.914	61.705	3.8147e-06		0	0	0	3.0101e-18	2	22789	248.97	248.97	1	0.25146	0.062014	0
NDGAAILAAVSSIAQK	16	1	0	Unmodified	_NDGAAILAAVSSIAQK_			0	0	P28331-2;P28331;P28331-5;P28331-4;P28331-3;B4DJ81	P28331-2	P28331-2	NDUFS1	NADH-ubiquinone oxidoreductase 75 kDa subunit, mitochondrial	>sp|P28331-2|NDUS1_HUMAN Isoform 2 of NADH-ubiquinone oxidoreductase 75 kDa subunit, mitochondrial OS=Homo sapiens GN=NDUFS1;>sp|P28331|NDUS1_HUMAN NADH-ubiquinone oxidoreductase 75 kDa subunit, mitochondrial OS=Homo sapiens GN=NDUFS1 PE=1 SV=3;>sp|P28331-	MULTI-MSMS		JACB153_3	MCF7 R10K8	768.93	2	764.92	1527.83	39994.4	-0.66372	-1.4942	-2.1579	764.919	768.928	64.961	25.65	0.83783	64.961	64.736	65.573	0		0	0	0	1.058e-07	1	24130	137.45	137.45	1	0.28303	0.10604	0
IQAAEHKTR	9	1	1	Unmodified	_IQAAEHKTR_			0	0	Q8IZ41	Q8IZ41	Q8IZ41	RASEF	Ras and EF-hand domain-containing protein	>sp|Q8IZ41|RASEF_HUMAN Ras and EF-hand domain-containing protein OS=Homo sapiens GN=RASEF PE=1 SV=1	MULTI-SECPEP		JACB153_3	MCF7 R10K8	537.25	2	527.294	1052.57	48059.2	-0.43521	0.51013	0.07492	527.294	536.305	34.021	15.336	0.36098	34.021	33.786	34.147	0		0	0	0	0.059539	1	11471	33.378	3.901	1	0.31985	0.40227	0
FSTSSLLLR	9	0	1	Unmodified	_FSTSSLLLR_			0	0	Q9Y5Q8-3;Q9Y5Q8;H7BY84;Q9Y5Q8-2;Q5T7U1;Q5T7U4	Q9Y5Q8-3	Q9Y5Q8-3	GTF3C5	General transcription factor 3C polypeptide 5	>sp|Q9Y5Q8-3|TF3C5_HUMAN Isoform 3 of General transcription factor 3C polypeptide 5 OS=Homo sapiens GN=GTF3C5;>sp|Q9Y5Q8|TF3C5_HUMAN General transcription factor 3C polypeptide 5 OS=Homo sapiens GN=GTF3C5 PE=1 SV=2;>tr|H7BY84|H7BY84_HUMAN General transcrip	MULTI-SECPEP		JACB153_3	MCF7 R10K8	517.33	2	512.295	1022.58	50015.9	-0.20228	-0.40927	-0.61155	512.295	517.3	46.645	19.551	0.37014	46.645	46.405	46.775	0		0	0	0	0.062789	1	16988	37.73	42.336	1	0.33524	0.1777	0
KGTDLWLGVDALGLNIYEK	19	2	0	Unmodified	_KGTDLWLGVDALGLNIYEK_			0	0	P15311;E7EQR4	P15311	P15311	EZR	Ezrin	>sp|P15311|EZRI_HUMAN Ezrin OS=Homo sapiens GN=EZR PE=1 SV=4;>tr|E7EQR4|E7EQR4_HUMAN Ezrin OS=Homo sapiens GN=EZR PE=1 SV=2	MULTI-MSMS		JACB153_3	MCF7 R10K8	708.06	3	702.381	2104.12	41975.3	-0.23645	0.57229	0.33585	702.716	707.723	70.012	27.339	0.64186	70.012	69.799	70.441	0		0	0	0	7.2837e-05	1	25921	92.492	92.492	1	0.35127	0.60511	0
ALASQLQDSLK	11	1	0	Unmodified	_ALASQLQDSLK_			0	0	P18206;P18206-2;Q5JQ13	P18206	P18206	VCL	Vinculin	>sp|P18206|VINC_HUMAN Vinculin OS=Homo sapiens GN=VCL PE=1 SV=4;>sp|P18206-2|VINC_HUMAN Isoform 1 of Vinculin OS=Homo sapiens GN=VCL;>tr|Q5JQ13|Q5JQ13_HUMAN Vinculin (Fragment) OS=Homo sapiens GN=VCL PE=1 SV=1	MULTI-MSMS		JACB153_3	MCF7 R10K8	591.34	2	587.327	1172.64	46078.5	-0.043721	0.93763	0.89391	587.328	591.334	36.554	16.185	0.86319	36.554	36.154	37.017	0		0	0	0	0.00075641	1	12562	96.229	96.229	1	0.35422	0.10144	0
LGLLGLPAPK	10	1	0	Unmodified	_LGLLGLPAPK_			0	0	Q99459	Q99459	Q99459	CDC5L	Cell division cycle 5-like protein	>sp|Q99459|CDC5L_HUMAN Cell division cycle 5-like protein OS=Homo sapiens GN=CDC5L PE=1 SV=2	MULTI-SECPEP		JACB153_3	MCF7 R10K8	492.92	2	489.821	977.627	50383	0.031078	-0.33587	-0.30479	489.821	493.828	53.312	21.771	0.38701	53.312	53.106	53.493	-3.8147e-06		0	0	0	0.055315	1	19658	38.75	44.318	1	0.37403	0.12742	0
AAAMVPGR	8	0	1	Acetyl (Protein N-term)	_(ac)AAAMVPGR_			1	0	H0Y8X4;O43598;O43598-2	H0Y8X4	H0Y8X4	C6orf108;RCL	Deoxyribonucleoside 5-monophosphate N-glycosidase	>tr|H0Y8X4|H0Y8X4_HUMAN 2-deoxynucleoside 5-phosphate N-hydrolase 1 (Fragment) OS=Homo sapiens GN=DNPH1 PE=1 SV=1;>sp|O43598|DNPH1_HUMAN 2-deoxynucleoside 5-phosphate N-hydrolase 1 OS=Homo sapiens GN=DNPH1 PE=1 SV=1;>sp|O43598-2|DNPH1_HUMAN Isoform 2 o	MULTI-SECPEP		JACB153_3	MCF7 R10K8	411.75	2	407.716	813.417	54866.3	-0.40179	2.5926	2.1909	407.717	412.72	38.432	16.807	0.42943	38.432	38.215	38.645	0		0	0	0	1.789e-05	1	13450	63.486	54.751	1	0.39654	0.19937	0
TEELKPQVEEK	11	2	0	Unmodified	_TEELKPQVEEK_			0	0	Q9UN86;Q9UN86-2	Q9UN86	Q9UN86	G3BP2	Ras GTPase-activating protein-binding protein 2	>sp|Q9UN86|G3BP2_HUMAN Ras GTPase-activating protein-binding protein 2 OS=Homo sapiens GN=G3BP2 PE=1 SV=2;>sp|Q9UN86-2|G3BP2_HUMAN Isoform B of Ras GTPase-activating protein-binding protein 2 OS=Homo sapiens GN=G3BP2	MULTI-MSMS		JACB153_3	MCF7 R10K8	449.24	3	443.901	1328.68	52215.1	-0.27112	-0.31336	-0.58448	444.235	449.245	17.417	9.8049	0.61902	17.417	17.183	17.802	0		0	0	0	0.0013702	1	4354	114.86	92.631	1	0.43977	0.75755	0
MDLNSEQAEQLER	13	0	1	Unmodified	_MDLNSEQAEQLER_			0	0	Q52LJ0-2;Q52LJ0	Q52LJ0-2	Q52LJ0-2	FAM98B	Protein FAM98B	>sp|Q52LJ0-2|FA98B_HUMAN Isoform 2 of Protein FAM98B OS=Homo sapiens GN=FAM98B;>sp|Q52LJ0|FA98B_HUMAN Protein FAM98B OS=Homo sapiens GN=FAM98B PE=1 SV=1	MULTI-MSMS		JACB153_3	MCF7 R10K8	787.36	2	781.859	1561.7	39801.5	-0.96965	1.0997	0.13004	781.861	787.364	35.151	15.714	0.35846	35.151	34.954	35.313	0		0	0	0	1.86e-06	1	11968	157.52	144.1	1	0.4648	0.20805	0
LHGSVGGAQNLSALGALVSLSNAR	24	0	1	Unmodified	_LHGSVGGAQNLSALGALVSLSNAR_			0	0	Q8IZL8-2;C9JFV4;I3L3A8;Q8IZL8;F8WDZ1;I3L445;I3L4M7;I3L1P4	Q8IZL8-2	Q8IZL8-2	PELP1	Proline-, glutamic acid- and leucine-rich protein 1	>sp|Q8IZL8-2|PELP1_HUMAN Isoform 2 of Proline-, glutamic acid- and leucine-rich protein 1 OS=Homo sapiens GN=PELP1;>tr|C9JFV4|C9JFV4_HUMAN Proline-, glutamic acid- and leucine-rich protein 1 OS=Homo sapiens GN=PELP1 PE=1 SV=1;>tr|I3L3A8|I3L3A8_HUMAN Prolin	MULTI-MSMS		JACB153_3	MCF7 R10K8	768.42	3	764.752	2291.23	40785.3	-0.48321	1.2132	0.73002	765.088	768.423	59.095	23.699	0.45831	59.095	58.882	59.34	0		0	0	0	0.0021259	1	21950	76.417	61.655	1	0.54781	0.3145	0
STESLQANVQR	11	0	1	Unmodified	_STESLQANVQR_			0	0	P26373;J3QSB4	P26373	P26373	RPL13	60S ribosomal protein L13	>sp|P26373|RL13_HUMAN 60S ribosomal protein L13 OS=Homo sapiens GN=RPL13 PE=1 SV=4;>tr|J3QSB4|J3QSB4_HUMAN 60S ribosomal protein L13 (Fragment) OS=Homo sapiens GN=RPL13 PE=1 SV=1	MULTI-MSMS		JACB153_3	MCF7 R10K8	621.82	2	616.815	1231.62	44835.4	-0.07128	1.9263	1.855	617.319	621.819	20.411	10.805	0.40518	20.411	20.218	20.623	0		0	0	0	4.2184e-09	1	5497	197.06	186.16	1	0.55445	0.18814	0
NALLQLTDSQIADVAR	16	0	1	Unmodified	_NALLQLTDSQIADVAR_			0	0	O75643;B4E0P5	O75643	O75643	SNRNP200	U5 small nuclear ribonucleoprotein 200 kDa helicase	>sp|O75643|U520_HUMAN U5 small nuclear ribonucleoprotein 200 kDa helicase OS=Homo sapiens GN=SNRNP200 PE=1 SV=2;>tr|B4E0P5|B4E0P5_HUMAN U5 small nuclear ribonucleoprotein 200 kDa helicase OS=Homo sapiens GN=SNRNP200 PE=1 SV=1	MULTI-MSMS		JACB153_3	MCF7 R10K8	579.98	3	576.648	1726.92	47229.1	0.020974	0.077791	0.098765	576.982	579.984	59.23	23.742	0.47099	59.23	58.97	59.441	0		0	0	0	3.6309e-08	1	21970	150.59	132.13	1	0.61832	0.28711	0
LQFIADHCPTLR	12	0	1	Unmodified	_LQFIADHCPTLR_			0	0	Q13098-7;Q13098;Q13098-5;C9JFE4;J3KRJ4;J3KSA5;J3QLT0;J3KTB0;J3QS88;J3KRE8;J3QL53;J3QLE8;J3QS84	Q13098-7	Q13098-7	GPS1	COP9 signalosome complex subunit 1	>sp|Q13098-7|CSN1_HUMAN Isoform 2 of COP9 signalosome complex subunit 1 OS=Homo sapiens GN=GPS1;>sp|Q13098|CSN1_HUMAN COP9 signalosome complex subunit 1 OS=Homo sapiens GN=GPS1 PE=1 SV=4;>sp|Q13098-5|CSN1_HUMAN Isoform 4 of COP9 signalosome complex subunit	MULTI-MSMS		JACB153_3	MCF7 R10K8	494.26	3	490.922	1469.74	49533.2	0.51047	0.40242	0.91288	491.258	494.258	37.062	16.355	0.83845	37.062	36.471	37.309	0		0	0	0	0.0053241	1	12847	84.718	72.163	1	0.62237	0.23535	0
AAAAVVEFQR	10	0	1	Acetyl (Protein N-term)	_(ac)AAAAVVEFQR_			1	0	O00231-2;O00231;J3QRY4	O00231-2	O00231-2	PSMD11	26S proteasome non-ATPase regulatory subunit 11	>sp|O00231-2|PSD11_HUMAN Isoform 2 of 26S proteasome non-ATPase regulatory subunit 11 OS=Homo sapiens GN=PSMD11;>sp|O00231|PSD11_HUMAN 26S proteasome non-ATPase regulatory subunit 11 OS=Homo sapiens GN=PSMD11 PE=1 SV=3;>tr|J3QRY4|J3QRY4_HUMAN 26S proteasom	MULTI-MSMS		JACB153_3	MCF7 R10K8	557.3	2	552.296	1102.58	46434.6	0.31453	1.5744	1.8889	552.797	557.301	55.782	22.59	0.65766	55.782	55.474	56.131	3.8147e-06		0	0	0	0.00064021	1	20557	120.68	100.69	1	0.63954	0.24345	0
HLNEIDLFHCIDPNDSK	17	1	0	Unmodified	_HLNEIDLFHCIDPNDSK_			0	0	Q15185;B4DP11;B4DP21	Q15185	Q15185	PTGES3	Prostaglandin E synthase 3	>sp|Q15185|TEBP_HUMAN Prostaglandin E synthase 3 OS=Homo sapiens GN=PTGES3 PE=1 SV=1;>tr|B4DP11|B4DP11_HUMAN Prostaglandin E synthase 3 OS=Homo sapiens GN=PTGES3 PE=1 SV=1;>tr|B4DP21|B4DP21_HUMAN Prostaglandin E synthase 3 OS=Homo sapiens GN=PTGES3 PE=1 SV	MULTI-MSMS		JACB153_3	MCF7 R10K8	519.75	4	517.495	2065.95	48807.4	0.11856	1.3756	1.4942	517.747	519.75	47.542	19.851	0.47687	47.542	47.269	47.746	3.8147e-06		0	0	0	0.0021671	1	17282	62.916	62.916	1	0.66395	0.18433	0
DFLLTAR	7	0	1	Unmodified	_DFLLTAR_			0	0	P63173;J3QL01;J3KT73;J3KSP2	P63173	P63173	RPL38	60S ribosomal protein L38	>sp|P63173|RL38_HUMAN 60S ribosomal protein L38 OS=Homo sapiens GN=RPL38 PE=1 SV=2;>tr|J3QL01|J3QL01_HUMAN 60S ribosomal protein L38 OS=Homo sapiens GN=RPL38 PE=1 SV=1;>tr|J3KT73|J3KT73_HUMAN 60S ribosomal protein L38 OS=Homo sapiens GN=RPL38 PE=1 SV=1;>tr	MULTI-MSMS		JACB153_3	MCF7 R10K8	423.24	2	418.237	834.46	53563.8	-0.40348	1.6394	1.2359	418.238	423.241	45.317	19.104	0.52901	45.317	45.054	45.583	-3.8147e-06		0	0	0	0.013513	1	16391	78.496	7.5837	1	0.72861	0.28672	0
GDVENIEVVQK	11	1	0	Unmodified	_GDVENIEVVQK_			0	0	P42704	P42704	P42704	LRPPRC	Leucine-rich PPR motif-containing protein, mitochondrial	>sp|P42704|LPPRC_HUMAN Leucine-rich PPR motif-containing protein, mitochondrial OS=Homo sapiens GN=LRPPRC PE=1 SV=3	MULTI-MSMS		JACB153_3	MCF7 R10K8	619.33	2	615.322	1228.63	46085.6	-0.10648	2.6648	2.5583	615.826	619.329	30.03	14.013	0.41366	30.03	29.881	30.294	-1.9073e-06		0	0	0	0.00057739	1	9714	113.67	86.998	1	0.7341	0.24642	0
VPLAPITDPQQLQLSPLK	18	1	0	Unmodified	_VPLAPITDPQQLQLSPLK_			0	0	P31350-2;P31350	P31350-2	P31350-2	RRM2	Ribonucleoside-diphosphate reductase subunit M2	>sp|P31350-2|RIR2_HUMAN Isoform 2 of Ribonucleoside-diphosphate reductase subunit M2 OS=Homo sapiens GN=RRM2;>sp|P31350|RIR2_HUMAN Ribonucleoside-diphosphate reductase subunit M2 OS=Homo sapiens GN=RRM2 PE=1 SV=1	MULTI-MSMS		JACB153_3	MCF7 R10K8	983.58	2	979.57	1957.12	36306.3	-0.58453	2.5662	1.9817	980.073	984.078	63.588	25.193	0.38977	63.588	63.396	63.786	0		0	0	0	7.8031e-11	1	23585	143.28	143.28	1	0.75859	0.27667	0
GCELVDLADEVASVYQSYQPR	21	0	1	Unmodified	_GCELVDLADEVASVYQSYQPR_			0	0	Q7Z434;Q7Z434-2	Q7Z434	Q7Z434	MAVS	Mitochondrial antiviral-signaling protein	>sp|Q7Z434|MAVS_HUMAN Mitochondrial antiviral-signaling protein OS=Homo sapiens GN=MAVS PE=1 SV=2;>sp|Q7Z434-2|MAVS_HUMAN Isoform 2 of Mitochondrial antiviral-signaling protein OS=Homo sapiens GN=MAVS	MULTI-MSMS		JACB153_3	MCF7 R10K8	804.05	3	800.378	2398.11	39718.3	-0.36561	0.95961	0.594	800.713	803.715	88.262	33.421	0.69493	88.262	87.968	88.662	0		0	0	0	0.0014912	1	32344	70.413	70.413	1	0.79118	0.52752	0
DLGVLDVIFHPTQPWVFSSGADGTVR	26	0	1	Unmodified	_DLGVLDVIFHPTQPWVFSSGADGTVR_			0	0	Q14137;Q96Q25	Q14137	Q14137	BOP1;KM-PA-2	Ribosome biogenesis protein BOP1	>sp|Q14137|BOP1_HUMAN Ribosome biogenesis protein BOP1 OS=Homo sapiens GN=BOP1 PE=1 SV=2;>tr|Q96Q25|Q96Q25_HUMAN Ribosome biogenesis protein BOP1 OS=Homo sapiens GN=KM-PA-2 PE=2 SV=1	MULTI-MSMS		JACB153_3	MCF7 R10K8	942.15	3	938.48	2812.42	35893.5	-0.49144	0.14141	-0.35003	939.149	942.15	91.368	34.456	0.90019	91.368	90.885	91.785	0		0	0	0	1.4064e-06	1	33409	95.123	92.06	1	0.80885	0.45761	0
SSNTYTLTDVR	11	0	1	Unmodified	_SSNTYTLTDVR_			0	0	Q13740;Q13740-2;F5GXJ9	Q13740	Q13740	ALCAM	CD166 antigen	>sp|Q13740|CD166_HUMAN CD166 antigen OS=Homo sapiens GN=ALCAM PE=1 SV=2;>sp|Q13740-2|CD166_HUMAN Isoform 2 of CD166 antigen OS=Homo sapiens GN=ALCAM;>tr|F5GXJ9|F5GXJ9_HUMAN CD166 antigen OS=Homo sapiens GN=ALCAM PE=1 SV=1	MULTI-MSMS		JACB153_3	MCF7 R10K8	633.81	2	628.809	1255.6	43709.6	-0.3213	0.52141	0.2001	629.312	633.813	30.425	14.139	0.36158	30.425	30.227	30.588	1.9073e-06		0	0	0	0.00060827	1	9876	110.66	110.66	1	0.81719	0.36679	0
SAIQAAWPSGTECIAK	16	1	0	Acetyl (Protein N-term)	_(ac)SAIQAAWPSGTECIAK_			1	0	P41240;H3BUM9;H3BN15	P41240	P41240	CSK	Tyrosine-protein kinase CSK	>sp|P41240|CSK_HUMAN Tyrosine-protein kinase CSK OS=Homo sapiens GN=CSK PE=1 SV=1;>tr|H3BUM9|H3BUM9_HUMAN Tyrosine-protein kinase CSK (Fragment) OS=Homo sapiens GN=CSK PE=1 SV=1;>tr|H3BN15|H3BN15_HUMAN Tyrosine-protein kinase CSK (Fragment) OS=Homo sapiens	MULTI-MSMS		JACB153_3	MCF7 R10K8	870.43	2	866.422	1730.83	37230.5	-0.67594	1.3562	0.6803	867.427	870.431	61.179	24.392	0.34105	61.179	60.98	61.321	0		0	0	0	1.84e-05	1	22702	93.754	93.754	1	0.82218	0.42739	0
SGDAAIVDMVPGK	13	1	0	Unmodified	_SGDAAIVDMVPGK_			0	0	P68104;Q5VTE0	P68104	P68104	EEF1A1;EEF1A1P5	Elongation factor 1-alpha 1;Putative elongation factor 1-alpha-like 3	>sp|P68104|EF1A1_HUMAN Elongation factor 1-alpha 1 OS=Homo sapiens GN=EEF1A1 PE=1 SV=1;>sp|Q5VTE0|EF1A3_HUMAN Putative elongation factor 1-alpha-like 3 OS=Homo sapiens GN=EEF1A1P5 PE=5 SV=1	MULTI-MSMS		JACB153_3	MCF7 R10K8	634.32	2	630.319	1258.62	42953.4	-0.22852	-0.30701	-0.53553	630.319	634.325	42.927	18.307	0.4576	42.927	42.692	43.149	-3.8147e-06		0	0	0	0.00013247	1	15367	110.92	96.959	1	0.90279	0.23111	0
NYGILADATEQVGQHK	16	1	0	Unmodified	_NYGILADATEQVGQHK_			0	0	Q9BZZ5;G3V1C3;Q9BZZ5-2;Q9BZZ5-3;E9PQK6	Q9BZZ5	Q9BZZ5	API5	Apoptosis inhibitor 5	>sp|Q9BZZ5|API5_HUMAN Apoptosis inhibitor 5 OS=Homo sapiens GN=API5 PE=1 SV=3;>tr|G3V1C3|G3V1C3_HUMAN Apoptosis inhibitor 5 OS=Homo sapiens GN=API5 PE=1 SV=1;>sp|Q9BZZ5-2|API5_HUMAN Isoform 2 of Apoptosis inhibitor 5 OS=Homo sapiens GN=API5;>sp|Q9BZZ5-3|AP	MULTI-MSMS		JACB153_3	MCF7 R10K8	584.63	3	581.96	1742.86	46272.3	-0.94223	0.64909	-0.29314	582.295	584.966	38.835	16.94	0.53889	38.835	38.538	39.076	0		0	0	0	1.3195e-07	1	13620	132.51	132.51	1	1.0061	0.33146	0
AEISELPSIVQDLANGNITWADVEAR	26	0	1	Unmodified	_AEISELPSIVQDLANGNITWADVEAR_			0	0	P41250	P41250	P41250	GARS	Glycine--tRNA ligase	>sp|P41250|SYG_HUMAN Glycine--tRNA ligase OS=Homo sapiens GN=GARS PE=1 SV=3	MULTI-MSMS		JACB153_3	MCF7 R10K8	941.48	3	937.81	2810.41	35950.1	-0.47107	0.48042	0.0093527	938.145	941.48	90.436	34.143	0.85599	90.436	90.029	90.885	0		0	0	0	0.0033375	1	33030	64.152	64.152	1	1.1048	0.95291	0
RDFAPPGQQK	10	1	1	Unmodified	_RDFAPPGQQK_			0	0	Q9BVC6	Q9BVC6	Q9BVC6	TMEM109	Transmembrane protein 109	>sp|Q9BVC6|TM109_HUMAN Transmembrane protein 109 OS=Homo sapiens GN=TMEM109 PE=1 SV=1	MULTI-MSMS		JACB153_3	MCF7 R10K8	581.31	2	572.299	1142.58	46483.4	0.30876	1.4939	1.8027	572.802	581.31	15.32	9.1071	0.33938	15.32	15.179	15.518	0		0	0	0	0.0010514	1	3604	99.283	88.911	1	1.1081	1.3937	0
YSQTGNYELAVALSR	15	0	1	Unmodified	_YSQTGNYELAVALSR_			0	0	P39656;E7EWT1	P39656	P39656	DDOST	Dolichyl-diphosphooligosaccharide--protein glycosyltransferase 48 kDa subunit	>sp|P39656|OST48_HUMAN Dolichyl-diphosphooligosaccharide--protein glycosyltransferase 48 kDa subunit OS=Homo sapiens GN=DDOST PE=1 SV=4;>tr|E7EWT1|E7EWT1_HUMAN Dolichyl-diphosphooligosaccharide--protein glycosyltransferase 48 kDa subunit OS=Homo sapiens GN	MULTI-MSMS		JACB153_3	MCF7 R10K8	841.43	2	836.42	1670.83	37663.3	-0.97998	0.92974	-0.050246	837.422	841.428	48.334	20.114	0.33316	48.334	48.153	48.486	3.8147e-06		0	0	0	1.8723e-05	1	17627	103.61	51.914	1	1.1433	0.59756	0
IICQGFTGK	9	1	0	Unmodified	_IICQGFTGK_			0	0	P53597;H7C233	P53597	P53597	SUCLG1	Succinyl-CoA ligase [ADP/GDP-forming] subunit alpha, mitochondrial	>sp|P53597|SUCA_HUMAN Succinyl-CoA ligase [ADP/GDP-forming] subunit alpha, mitochondrial OS=Homo sapiens GN=SUCLG1 PE=1 SV=4;>tr|H7C233|H7C233_HUMAN Succinyl-CoA ligase [ADP/GDP-forming] subunit alpha, mitochondrial (Fragment) OS=Homo sapiens GN=SUCLG1 PE=	MULTI-MSMS		JACB153_3	MCF7 R10K8	516.28	2	512.268	1022.52	48371	-0.1302	1.7111	1.5809	512.773	516.276	25.304	12.432	0.33444	25.304	25.13	25.464	0		0	0	0	0.00098092	1	7623	101.9	82.119	1	1.2297	0.42077	0
TVQDLTSVVQTLLQQMQDK	19	1	0	Unmodified	_TVQDLTSVVQTLLQQMQDK_			0	0	O75506	O75506	O75506	HSBP1	Heat shock factor-binding protein 1	>sp|O75506|HSBP1_HUMAN Heat shock factor-binding protein 1 OS=Homo sapiens GN=HSBP1 PE=1 SV=1	MULTI-MSMS		JACB153_3	MCF7 R10K8	728.72	3	725.716	2174.13	40820.5	-0.13816	-0.012874	-0.15103	726.718	728.721	96.521	57.498	0.64548	96.521	96.18	96.825	0		0	0	0	0.001378	1	35106	70.335	70.335	1	1.2442	0.90719	0
YSLLPFWYTLLYQAHR	16	0	1	Unmodified	_YSLLPFWYTLLYQAHR_			0	0	Q14697;F5H6X6;Q14697-2;E9PKU7	Q14697;Q14697-2	Q14697-2	GANAB	Neutral alpha-glucosidase AB	>sp|Q14697|GANAB_HUMAN Neutral alpha-glucosidase AB OS=Homo sapiens GN=GANAB PE=1 SV=3;>tr|F5H6X6|F5H6X6_HUMAN Neutral alpha-glucosidase AB OS=Homo sapiens GN=GANAB PE=1 SV=1;>sp|Q14697-2|GANAB_HUMAN Isoform 2 of Neutral alpha-glucosidase AB OS=Homo sapien	MULTI-MSMS		JACB153_3	MCF7 R10K8	694.7	3	691.032	2070.07	42087.1	0.078437	-0.2518	-0.17336	691.031	694.702	82.267	31.424	0.82664	82.267	81.843	82.67	7.6294e-06		0	0	0	1.2205e-05	2	30299	98.676	98.676	1	1.2952	0.54626	0
DVLEVGELAK	10	1	0	Unmodified	_DVLEVGELAK_			0	0	Q9GZZ1;E7EQ69;C9J5D1;C9JZU6	Q9GZZ1	Q9GZZ1	NAA50	N-alpha-acetyltransferase 50	>sp|Q9GZZ1|NAA50_HUMAN N-alpha-acetyltransferase 50 OS=Homo sapiens GN=NAA50 PE=1 SV=1;>tr|E7EQ69|E7EQ69_HUMAN N-alpha-acetyltransferase 50 OS=Homo sapiens GN=NAA50 PE=1 SV=1;>tr|C9J5D1|C9J5D1_HUMAN N-alpha-acetyltransferase 50 OS=Homo sapiens GN=NAA50 PE=	MULTI-MSMS		JACB153_3	MCF7 R10K8	540.81	2	536.798	1071.58	48213.2	-0.15875	-0.15499	-0.31374	537.299	540.805	47.315	19.772	0.57388	47.315	46.991	47.564	0		0	0	0	0.0085242	1	17208	69.01	48.011	1	1.3044	0.45195	0
YIEIYVQK	8	1	0	Unmodified	_YIEIYVQK_			0	0	Q00610;Q00610-2;P53675;P53675-2;J3KR87	Q00610	Q00610	CLTC;CLTCL1	Clathrin heavy chain 1;Clathrin heavy chain 2	>sp|Q00610|CLH1_HUMAN Clathrin heavy chain 1 OS=Homo sapiens GN=CLTC PE=1 SV=5;>sp|Q00610-2|CLH1_HUMAN Isoform 2 of Clathrin heavy chain 1 OS=Homo sapiens GN=CLTC;>sp|P53675|CLH2_HUMAN Clathrin heavy chain 2 OS=Homo sapiens GN=CLTCL1 PE=1 SV=2;>sp|P53675-2	MULTI-MSMS		JACB153_3	MCF7 R10K8	532.3	2	528.292	1054.57	48472.9	0.60201	-0.21284	0.38917	528.291	532.3	37.21	16.401	0.5001	37.21	36.97	37.471	3.8147e-06		0	0	0	0.0025908	1	12886	96.253	96.253	1	1.3319	0.42347	0
AFVAIGDYNGHVGLGVK	17	1	0	Unmodified	_AFVAIGDYNGHVGLGVK_			0	0	P15880;H0YEN5;E9PMM9;E9PM36;I3L404;E9PPT0	P15880	P15880	RPS2	40S ribosomal protein S2	>sp|P15880|RS2_HUMAN 40S ribosomal protein S2 OS=Homo sapiens GN=RPS2 PE=1 SV=2;>tr|H0YEN5|H0YEN5_HUMAN 40S ribosomal protein S2 (Fragment) OS=Homo sapiens GN=RPS2 PE=1 SV=1;>tr|E9PMM9|E9PMM9_HUMAN 40S ribosomal protein S2 (Fragment) OS=Homo sapiens GN=RPS	MULTI-MSMS		JACB153_3	MCF7 R10K8	575.98	3	572.974	1715.9	46160.9	-0.61216	3.2393	2.6271	572.976	575.646	46.361	19.456	0.44166	46.361	46.137	46.578	3.8147e-06		0	0	0	0.00069473	1	16843	83.966	83.966	1	1.3605	0.5002	0
ALMGLYHGQVLCK	13	1	0	Unmodified	_ALMGLYHGQVLCK_			0	0	P40939	P40939	P40939	HADHA	Trifunctional enzyme subunit alpha, mitochondrial;Long-chain enoyl-CoA hydratase;Long chain 3-hydroxyacyl-CoA dehydrogenase	>sp|P40939|ECHA_HUMAN Trifunctional enzyme subunit alpha, mitochondrial OS=Homo sapiens GN=HADHA PE=1 SV=2	MULTI-MSMS		JACB153_3	MCF7 R10K8	499.93	3	497.26	1488.76	50382.6	0.17415	0.15646	0.33061	497.595	499.931	37.835	16.616	0.34371	37.835	37.663	38.007	0		0	0	0	0.00019629	1	13171	97.214	97.214	1	1.3946	0.48713	0
HDLDLICR	8	0	1	Unmodified	_HDLDLICR_			0	0	P36873-2;P36873;F8VYE8;F8W0W8;F8VR82;P62136;P62136-2;E9PMD7;P62136-3;P62140	P36873-2;P62136;P62140	P62136	PPP1CC;PPP1CA;PPP1CB	Serine/threonine-protein phosphatase PP1-gamma catalytic subunit;Serine/threonine-protein phosphatase;Serine/threonine-protein phosphatase PP1-alpha catalytic subunit;Serine/threonine-protein phosphatase PP1-beta catalytic subunit	>sp|P36873-2|PP1G_HUMAN Isoform Gamma-2 of Serine/threonine-protein phosphatase PP1-gamma catalytic subunit OS=Homo sapiens GN=PPP1CC;>sp|P36873|PP1G_HUMAN Serine/threonine-protein phosphatase PP1-gamma catalytic subunit OS=Homo sapiens GN=PPP1CC PE=1 SV=1	MULTI-MSMS		JACB153_3	MCF7 R10K8	526.27	2	521.261	1040.51	48259.4	0.49501	0.60073	1.0957	521.764	526.265	29.286	13.765	0.78719	29.286	29.009	29.796	0		0	0	0	0.0020717	1	9367	121.05	84.715	1	1.4372	0.45557	0
NLDISRPDKK	10	2	1	Unmodified	_NLDISRPDKK_			0	0	P46977;E9PNQ1;H0YET6	P46977	P46977	STT3A	Dolichyl-diphosphooligosaccharide--protein glycosyltransferase subunit STT3A	>sp|P46977|STT3A_HUMAN Dolichyl-diphosphooligosaccharide--protein glycosyltransferase subunit STT3A OS=Homo sapiens GN=STT3A PE=1 SV=2;>tr|E9PNQ1|E9PNQ1_HUMAN Dolichyl-diphosphooligosaccharide--protein glycosyltransferase subunit STT3A OS=Homo sapiens GN=S	MULTI-SECPEP		JACB153_3	MCF7 R10K8	404.57	3	395.891	1184.65	54150.9	0.42701	-2.2355	-1.8085	396.224	404.57	15.146	9.0512	0.25667	15.146	15.042	15.298	0		0	0	0	0.13313	1	3537	35.178	35.178	1	1.4688	1.6209	0
HLWFQGIR	8	0	1	Unmodified	_HLWFQGIR_			0	0	P58107;E9PPU0	P58107;E9PPU0	P58107	EPPK1	Epiplakin	>sp|P58107|EPIPL_HUMAN Epiplakin OS=Homo sapiens GN=EPPK1 PE=1 SV=2;>tr|E9PPU0|E9PPU0_HUMAN Epiplakin OS=Homo sapiens GN=EPPK1 PE=1 SV=1	MULTI-MSMS		JACB153_3	MCF7 R10K8	533.79	2	528.791	1055.57	47776.6	-0.23591	-1.0924	-1.3283	528.789	533.795	39.573	17.188	0.41457	39.573	39.36	39.775	0		0	0	0	0.011624	1	13921	65.252	30.444	1	1.4704	0.60762	0
TDSCDVNDCVQQVVELLQER	20	0	1	Unmodified	_TDSCDVNDCVQQVVELLQER_			0	0	O43252	O43252	O43252	PAPSS1	Bifunctional 3-phosphoadenosine 5-phosphosulfate synthase 1;Sulfate adenylyltransferase;Adenylyl-sulfate kinase	>sp|O43252|PAPS1_HUMAN Bifunctional 3-phosphoadenosine 5-phosphosulfate synthase 1 OS=Homo sapiens GN=PAPSS1 PE=1 SV=2	MULTI-SECPEP		JACB153_3	MCF7 R10K8	805.39	3	803.034	2406.08	40658	-0.27804	-1.2828	-1.5608	803.701	806.703	78.022	30.01	0.4481	78.022	77.757	78.205	0		0	0	0	7.1351e-06	1	28728	23.892	41.73	1	1.6101	1.5491	0
VDDLLESYMGIR	12	0	1	Unmodified	_VDDLLESYMGIR_			0	0	O14908;O14908-2;K7EM11;Q8TF64	O14908	O14908	GIPC1;GIPC3	PDZ domain-containing protein GIPC1;PDZ domain-containing protein GIPC3	>sp|O14908|GIPC1_HUMAN PDZ domain-containing protein GIPC1 OS=Homo sapiens GN=GIPC1 PE=1 SV=2;>sp|O14908-2|GIPC1_HUMAN Isoform 2 of PDZ domain-containing protein GIPC1 OS=Homo sapiens GN=GIPC1;>tr|K7EM11|K7EM11_HUMAN PDZ domain-containing protein GIPC1 (Fr	MULTI-MSMS		JACB153_3	MCF7 R10K8	710.85	2	705.85	1409.69	40778.2	-0.25077	0.76668	0.51591	705.851	710.854	64.264	25.423	0.47961	64.264	64.02	64.499	0		0	0	0	0.00028974	1	23830	102.62	93.571	1	1.6174	0.79268	0
RDPHLACVAYER	12	0	2	Unmodified	_RDPHLACVAYER_			0	0	Q00610;Q00610-2;P53675;P53675-2;J3KR87	Q00610	Q00610	CLTC;CLTCL1	Clathrin heavy chain 1;Clathrin heavy chain 2	>sp|Q00610|CLH1_HUMAN Clathrin heavy chain 1 OS=Homo sapiens GN=CLTC PE=1 SV=5;>sp|Q00610-2|CLH1_HUMAN Isoform 2 of Clathrin heavy chain 1 OS=Homo sapiens GN=CLTC;>sp|P53675|CLH2_HUMAN Clathrin heavy chain 2 OS=Homo sapiens GN=CLTCL1 PE=1 SV=2;>sp|P53675-2	MULTI-MSMS		JACB153_3	MCF7 R10K8	502.92	3	496.245	1485.71	48503.5	0.21469	-1.2511	-1.0364	496.244	502.917	19.911	10.635	0.41599	19.911	19.749	20.165	1.9073e-06		0	0	0	0.00023715	1	5331	106.13	106.13	1	1.6175	2.0676	0
VTEAEIVPMGK	11	1	0	Unmodified	_VTEAEIVPMGK_			0	0	O75369;O75369-9;O75369-2;O75369-3;O75369-6;O75369-7;E7EN95;H7C5L4;O75369-8	O75369;O75369-8	O75369-8	FLNB	Filamin-B	>sp|O75369|FLNB_HUMAN Filamin-B OS=Homo sapiens GN=FLNB PE=1 SV=2;>sp|O75369-9|FLNB_HUMAN Isoform 9 of Filamin-B OS=Homo sapiens GN=FLNB;>sp|O75369-2|FLNB_HUMAN Isoform 2 of Filamin-B OS=Homo sapiens GN=FLNB;>sp|O75369-3|FLNB_HUMAN Isoform 3 of Filamin-B O	MULTI-MSMS		JACB153_3	MCF7 R10K8	591.32	2	587.313	1172.61	45503.6	-0.44523	-0.61912	-1.0643	587.814	591.32	35.687	15.894	0.33438	35.687	35.524	35.859	0		0	0	0	0.00060827	1	12201	110.66	109.51	1	1.6506	0.50025	0
FSPIPFPPLSYK	12	1	0	Unmodified	_FSPIPFPPLSYK_			0	0	Q6P2Q9;I3L0J9	Q6P2Q9	Q6P2Q9	PRPF8	Pre-mRNA-processing-splicing factor 8	>sp|Q6P2Q9|PRP8_HUMAN Pre-mRNA-processing-splicing factor 8 OS=Homo sapiens GN=PRPF8 PE=1 SV=2;>tr|I3L0J9|I3L0J9_HUMAN Pre-mRNA-processing-splicing factor 8 (Fragment) OS=Homo sapiens GN=PRPF8 PE=1 SV=2	MULTI-MSMS		JACB153_3	MCF7 R10K8	700.89	2	696.882	1391.75	41993.5	-0.33987	0.5722	0.23233	696.882	700.889	66.616	26.2	0.66544	66.616	66.293	66.959	0		0	0	0	0.034743	1	24670	59.185	59.185	1	1.6622	0.90422	0
IWTHPGWSPLK	11	1	0	Unmodified	_IWTHPGWSPLK_			0	0	O43172;O43172-2	O43172	O43172	PRPF4	U4/U6 small nuclear ribonucleoprotein Prp4	>sp|O43172|PRP4_HUMAN U4/U6 small nuclear ribonucleoprotein Prp4 OS=Homo sapiens GN=PRPF4 PE=1 SV=2;>sp|O43172-2|PRP4_HUMAN Isoform 2 of U4/U6 small nuclear ribonucleoprotein Prp4 OS=Homo sapiens GN=PRPF4	MULTI-MSMS		JACB153_3	MCF7 R10K8	444.24	3	441.24	1320.7	53177.2	-0.43819	-0.58263	-1.0208	441.574	443.911	39.938	17.313	0.56727	39.938	39.669	40.237	-3.8147e-06		0	0	0	0.096681	1	14062	47.288	47.288	1	1.6689	0.64733	0
LIVLVPPSKPTVNIPSSATIGNR	23	1	1	Unmodified	_LIVLVPPSKPTVNIPSSATIGNR_			0	0	Q9Y624	Q9Y624	Q9Y624	F11R	Junctional adhesion molecule A	>sp|Q9Y624|JAM1_HUMAN Junctional adhesion molecule A OS=Homo sapiens GN=F11R PE=1 SV=1	MULTI-MSMS		JACB153_3	MCF7 R10K8	798.14	3	791.8	2372.38	39925.5	-0.76686	-0.2854	-1.0523	792.468	798.143	53.275	21.761	0.38825	53.275	53.078	53.467	0		0	0	0	4.9828e-07	1	19624	120.64	120.64	1	1.7403	2.1887	0
LNTDPMLLQFFK	12	1	0	Unmodified	_LNTDPMLLQFFK_			0	0	Q93009;Q93009-3;F5H8E5;H3BND8	Q93009	Q93009	USP7	Ubiquitin carboxyl-terminal hydrolase 7;Ubiquitin carboxyl-terminal hydrolase	>sp|Q93009|UBP7_HUMAN Ubiquitin carboxyl-terminal hydrolase 7 OS=Homo sapiens GN=USP7 PE=1 SV=2;>sp|Q93009-3|UBP7_HUMAN Isoform 3 of Ubiquitin carboxyl-terminal hydrolase 7 OS=Homo sapiens GN=USP7;>tr|F5H8E5|F5H8E5_HUMAN Ubiquitin carboxyl-terminal hydrola	MULTI-MSMS		JACB153_3	MCF7 R10K8	737.9	2	733.889	1465.76	40387.9	0.19526	0.5438	0.73906	734.392	737.896	73.323	28.445	0.46487	73.323	73.097	73.562	-7.6294e-06		0	0	0	7.0501e-05	1	27088	138.45	130.72	1	1.7859	0.83495	0
GIVEESVTGVHR	12	0	1	Unmodified	_GIVEESVTGVHR_			0	0	Q96HN2;Q96HN2-2;F8W7N8;O43865;H0Y8B3;D7UEQ7;Q96HN2-3;Q96HN2-4;O43865-2	Q96HN2	Q96HN2	AHCYL2;AHCYL1	Putative adenosylhomocysteinase 3;Adenosylhomocysteinase;Putative adenosylhomocysteinase 2	>sp|Q96HN2|SAHH3_HUMAN Putative adenosylhomocysteinase 3 OS=Homo sapiens GN=AHCYL2 PE=1 SV=1;>sp|Q96HN2-2|SAHH3_HUMAN Isoform 2 of Putative adenosylhomocysteinase 3 OS=Homo sapiens GN=AHCYL2;>tr|F8W7N8|F8W7N8_HUMAN Adenosylhomocysteinase OS=Homo sapiens GN	MULTI-MSMS		JACB153_3	MCF7 R10K8	431.57	3	428.23	1281.67	51836.8	-0.63526	-1.4696	-2.1049	428.563	431.566	25.662	12.556	0.24797	25.662	25.539	25.787	0		0	0	0	0.00020983	1	7786	113.22	89.848	1	1.8552	0.85653	0
LDLQQGQNLLQGLSK	15	1	0	Unmodified	_LDLQQGQNLLQGLSK_			0	0	Q9HCE1;Q5JR04	Q9HCE1	Q9HCE1	MOV10	Putative helicase MOV-10	>sp|Q9HCE1|MOV10_HUMAN Putative helicase MOV-10 OS=Homo sapiens GN=MOV10 PE=1 SV=2;>tr|Q5JR04|Q5JR04_HUMAN Mov10, Moloney leukemia virus 10, homolog (Mouse), isoform CRA_a OS=Homo sapiens GN=MOV10 PE=1 SV=1	MULTI-MSMS		JACB153_3	MCF7 R10K8	831.97	2	827.96	1653.9	39673	-0.43208	0.49804	0.065964	827.961	831.967	59.207	23.739	0.39067	59.207	58.998	59.389	3.8147e-06		0	0	0	7.3958e-09	1	21938	162.7	127.05	1	1.8727	0.78173	0
KEFSPFGTITSAK	13	2	0	Unmodified	_KEFSPFGTITSAK_			0	0	P11940;P11940-2;E7ERJ7;E7EQV3;H0YAR2;H0YB86;H0YAP2	P11940	P11940	PABPC1	Polyadenylate-binding protein 1	>sp|P11940|PABP1_HUMAN Polyadenylate-binding protein 1 OS=Homo sapiens GN=PABPC1 PE=1 SV=2;>sp|P11940-2|PABP1_HUMAN Isoform 2 of Polyadenylate-binding protein 1 OS=Homo sapiens GN=PABPC1;>tr|E7ERJ7|E7ERJ7_HUMAN Polyadenylate-binding protein 1 OS=Homo sapie	MULTI-MSMS		JACB153_3	MCF7 R10K8	714.89	2	706.875	1411.73	42797.2	0.18195	0.4518	0.63375	707.377	714.889	36.973	16.325	0.32594	36.973	36.824	37.15	0		0	0	0	0.089768	1	12798	46.39	36.645	1	1.9476	3.3549	0
IYNDDKNTYIR	11	1	1	Unmodified	_IYNDDKNTYIR_			0	0	O75533	O75533	O75533	SF3B1	Splicing factor 3B subunit 1	>sp|O75533|SF3B1_HUMAN Splicing factor 3B subunit 1 OS=Homo sapiens GN=SF3B1 PE=1 SV=3	MULTI-MSMS		JACB153_3	MCF7 R10K8	478.24	3	472.237	1413.69	50690.2	-0.22407	-2.7631	-2.9872	472.235	478.243	21.413	11.138	0.31094	21.413	21.22	21.531	0		0	0	0	0.00064599	1	5940	138.71	96.712	1	1.982	2.4928	0
FFLEEIQLGEELLAQGEYEK	20	1	0	Unmodified	_FFLEEIQLGEELLAQGEYEK_			0	0	Q15388	Q15388	Q15388	TOMM20	Mitochondrial import receptor subunit TOM20 homolog	>sp|Q15388|TOM20_HUMAN Mitochondrial import receptor subunit TOM20 homolog OS=Homo sapiens GN=TOMM20 PE=1 SV=1	MULTI-MSMS		JACB153_3	MCF7 R10K8	798.74	3	795.734	2384.18	39188	-0.46078	0.55198	0.091204	796.737	798.739	91.37	34.456	0.64964	91.37	91.071	91.721	0		0	0	0	2.1892e-07	2	33391	111.95	111.95	1	2.006	1.6905	0
YALPLVGHR	9	0	1	Unmodified	_YALPLVGHR_			0	0	P13667	P13667	P13667	PDIA4	Protein disulfide-isomerase A4	>sp|P13667|PDIA4_HUMAN Protein disulfide-isomerase A4 OS=Homo sapiens GN=PDIA4 PE=1 SV=2	MULTI-MSMS		JACB153_3	MCF7 R10K8	518.3	2	513.298	1024.58	49712.3	-0.30978	-1.0994	-1.4092	513.299	518.302	33.992	15.329	0.50233	33.992	33.692	34.195	3.8147e-06		0	0	0	0.0079985	1	11481	69.954	69.954	1	2.0325	1.0694	0
TYGFHFTTPALVVEK	15	1	0	Unmodified	_TYGFHFTTPALVVEK_			0	0	O43237;O43237-2;B4E2E0	O43237	O43237	DYNC1LI2	Cytoplasmic dynein 1 light intermediate chain 2	>sp|O43237|DC1L2_HUMAN Cytoplasmic dynein 1 light intermediate chain 2 OS=Homo sapiens GN=DYNC1LI2 PE=1 SV=1;>sp|O43237-2|DC1L2_HUMAN Isoform 2 of Cytoplasmic dynein 1 light intermediate chain 2 OS=Homo sapiens GN=DYNC1LI2;>tr|B4E2E0|B4E2E0_HUMAN Cytoplasm	MULTI-MSMS		JACB153_3	MCF7 R10K8	573.31	3	570.635	1708.88	47380.3	-0.16841	-2.3398	-2.5082	571.301	573.306	51.564	21.19	0.39534	51.564	51.358	51.753	0		0	0	0	1.5412e-05	1	18972	107.5	107.5	1	2.0512	0.90842	0
HQAQIDHYLGLANK	14	1	0	Unmodified	_HQAQIDHYLGLANK_			0	0	Q9NQC3-2;Q9NQC3;Q9NQC3-5;F8W914;F8WAM4;Q9NQC3-4;Q9NQC3-6;H7C106;Q9NQC3-3	Q9NQC3-2	Q9NQC3-2	RTN4	Reticulon-4	>sp|Q9NQC3-2|RTN4_HUMAN Isoform 2 of Reticulon-4 OS=Homo sapiens GN=RTN4;>sp|Q9NQC3|RTN4_HUMAN Reticulon-4 OS=Homo sapiens GN=RTN4 PE=1 SV=2;>sp|Q9NQC3-5|RTN4_HUMAN Isoform 5 of Reticulon-4 OS=Homo sapiens GN=RTN4;>tr|F8W914|F8W914_HUMAN Reticulon OS=Homo	MULTI-MSMS		JACB153_3	MCF7 R10K8	539.29	3	536.614	1606.82	47906.6	0.15763	-1.363	-1.2054	536.613	539.285	28.413	13.474	0.4458	28.413	28.158	28.604	0		0	0	0	5.1385e-05	1	9001	107.61	107.61	1	2.1097	0.65976	0
VIATFTCSGEK	11	1	0	Unmodified	_VIATFTCSGEK_			0	0	P49189	P49189	P49189	ALDH9A1	4-trimethylaminobutyraldehyde dehydrogenase	>sp|P49189|AL9A1_HUMAN 4-trimethylaminobutyraldehyde dehydrogenase OS=Homo sapiens GN=ALDH9A1 PE=1 SV=3	MULTI-SECPEP		JACB153_3	MCF7 R10K8	610.29	2	606.8	1211.59	39843.3	-0.31236	-5.2739	-5.5863	606.796	610.804	28.003	13.334	0.29092	28.003	27.867	28.158	-1.9073e-06		0	0	0	0.018417	1	8818	48.568	64.55	1	2.134	0.80937	0
HSISMPAMR	9	0	1	Unmodified	_HSISMPAMR_			0	0	O43399-7;O43399-5;O43399-3;O43399-4;J3KNE7;Q16890;F6V707;E9PNK6;Q16890-2	O43399-7;J3KNE7	O43399-7	TPD52L1	Tumor protein D53	>sp|O43399-7|TPD54_HUMAN Isoform 7 of Tumor protein D54 OS=Homo sapiens GN=TPD52L2;>sp|O43399-5|TPD54_HUMAN Isoform 5 of Tumor protein D54 OS=Homo sapiens GN=TPD52L2;>sp|O43399-3|TPD54_HUMAN Isoform 3 of Tumor protein D54 OS=Homo sapiens GN=TPD52L2;>sp|O43	MULTI-SECPEP		JACB153_3	MCF7 R10K8	519.77	2	515.252	1028.49	49505	-0.073566	-1.7026	-1.7762	515.249	520.758	23.763	11.925	0.36712	23.763	23.525	23.892	0		0	0	0	0.089426	1	6917	38.567	37.344	1	2.1388	1.3243	0
FACHSASLTVR	11	0	1	Unmodified	_FACHSASLTVR_			0	0	Q15233;Q15233-2;C9JYS8;C9IZL7	Q15233	Q15233	NONO	Non-POU domain-containing octamer-binding protein	>sp|Q15233|NONO_HUMAN Non-POU domain-containing octamer-binding protein OS=Homo sapiens GN=NONO PE=1 SV=4;>sp|Q15233-2|NONO_HUMAN Isoform 2 of Non-POU domain-containing octamer-binding protein OS=Homo sapiens GN=NONO;>tr|C9JYS8|C9JYS8_HUMAN Non-POU domain-	MULTI-MSMS		JACB153_3	MCF7 R10K8	420.21	3	416.877	1247.61	53917.8	-0.087382	-0.025414	-0.1128	417.212	420.213	21.068	11.021	0.50027	21.068	20.783	21.283	0		0	0	0	0.00050137	1	5748	121.08	121.08	1	2.1607	0.79878	0
GPEVDVSGPK	10	1	0	Unmodified	_GPEVDVSGPK_			0	0	Q09666	Q09666	Q09666	AHNAK	Neuroblast differentiation-associated protein AHNAK	>sp|Q09666|AHNK_HUMAN Neuroblast differentiation-associated protein AHNAK OS=Homo sapiens GN=AHNAK PE=1 SV=2	MULTI-MSMS		JACB153_3	MCF7 R10K8	496.76	2	492.753	983.492	50288.8	0.12978	0.40296	0.53274	492.752	496.761	21.962	11.319	0.42342	21.962	21.746	22.17	0		0	0	0	0.001098	1	6159	104.52	104.52	1	2.3806	0.97674	0
KDEGSYSLEEPK	12	2	0	Unmodified	_KDEGSYSLEEPK_			0	0	P18827	P18827	P18827	SDC1	Syndecan-1	>sp|P18827|SDC1_HUMAN Syndecan-1 OS=Homo sapiens GN=SDC1 PE=1 SV=3	MULTI-SECPEP		JACB153_3	MCF7 R10K8	465.9	3	461.221	1380.64	51101.8	-0.32742	0.91942	0.592	461.556	466.564	21.16	11.055	0.19575	21.16	21.06	21.256	0		0	0	0	0.12499	1	5821	15.798	15.798	1	2.3955	4.1266	0
VYSLDDIR	8	0	1	Unmodified	_VYSLDDIR_			0	0	Q14566	Q14566	Q14566	MCM6	DNA replication licensing factor MCM6	>sp|Q14566|MCM6_HUMAN DNA replication licensing factor MCM6 OS=Homo sapiens GN=MCM6 PE=1 SV=1	MULTI-MSMS		JACB153_3	MCF7 R10K8	495.76	2	490.756	979.497	50405.8	-0.58404	1.0047	0.42066	490.756	495.761	38.639	16.878	0.52855	38.639	38.381	38.91	-3.8147e-06		0	0	0	0.0069415	1	13499	80.165	67.539	1	2.4053	1.1783	0
GSEAMAAGLCAGQCILK	17	1	0	Unmodified	_GSEAMAAGLCAGQCILK_			0	0	Q8TCU6;Q8TCU6-3;Q8TCU6-2;H0YDZ4	Q8TCU6	Q8TCU6	PREX1	Phosphatidylinositol 3,4,5-trisphosphate-dependent Rac exchanger 1 protein	>sp|Q8TCU6|PREX1_HUMAN Phosphatidylinositol 3,4,5-trisphosphate-dependent Rac exchanger 1 protein OS=Homo sapiens GN=PREX1 PE=1 SV=3;>sp|Q8TCU6-3|PREX1_HUMAN Isoform 3 of Phosphatidylinositol 3,4,5-trisphosphate-dependent Rac exchanger 1 protein OS=Homo sa	MULTI-MSMS		JACB153_3	MCF7 R10K8	873.42	2	868.91	1735.81	37439.9	-0.99511	-1.3859	-2.381	868.907	873.417	47.891	19.965	0.32561	47.891	47.746	48.072	0		0	0	0	8.7545e-09	1	17454	144.68	139.97	1	2.4137	1.1488	0
YKDLDEDELLGNLSETELK	19	2	0	Unmodified	_YKDLDEDELLGNLSETELK_			0	0	Q9NYL9;H0YNU8	Q9NYL9	Q9NYL9	TMOD3	Tropomodulin-3	>sp|Q9NYL9|TMOD3_HUMAN Tropomodulin-3 OS=Homo sapiens GN=TMOD3 PE=1 SV=1;>tr|H0YNU8|H0YNU8_HUMAN Tropomodulin-3 (Fragment) OS=Homo sapiens GN=TMOD3 PE=1 SV=1	MULTI-MSMS		JACB153_3	MCF7 R10K8	747.71	3	742.034	2223.08	40335.9	-0.57275	-1.3278	-1.9006	742.031	747.711	55.699	22.566	0.52682	55.699	55.428	55.955	0		0	0	0	2.1699e-07	1	20598	120.56	120.56	1	2.5214	4.3433	0
MLVDLAK	7	1	0	Unmodified	_MLVDLAK_			0	0	P06744;P06744-2;K7EQ48;K7EPY4;K7ENA0;K7ERC6;K7EP41;K7ELR7;K7ERK8	P06744	P06744	GPI	Glucose-6-phosphate isomerase	>sp|P06744|G6PI_HUMAN Glucose-6-phosphate isomerase OS=Homo sapiens GN=GPI PE=1 SV=4;>sp|P06744-2|G6PI_HUMAN Isoform 2 of Glucose-6-phosphate isomerase OS=Homo sapiens GN=GPI;>tr|K7EQ48|K7EQ48_HUMAN Glucose-6-phosphate isomerase OS=Homo sapiens GN=GPI PE=1	MULTI-MSMS		JACB153_3	MCF7 R10K8	399.24	2	395.231	788.447	54797.6	0.14088	-2.5127	-2.3718	395.228	399.237	36.629	16.21	0.68199	36.629	36.252	36.934	0		0	0	0	0.03445	1	12684	57.281	9.4324	1	2.5362	0.67177	0
AANATTNPSQLLPLELVDK	19	1	0	Acetyl (Protein N-term)	_(ac)AANATTNPSQLLPLELVDK_			1	0	Q9Y4Y9;B8ZZF8	Q9Y4Y9	Q9Y4Y9	LSM5	U6 snRNA-associated Sm-like protein LSm5	>sp|Q9Y4Y9|LSM5_HUMAN U6 snRNA-associated Sm-like protein LSm5 OS=Homo sapiens GN=LSM5 PE=1 SV=3;>tr|B8ZZF8|B8ZZF8_HUMAN U6 snRNA-associated Sm-like protein LSm5 OS=Homo sapiens GN=LSM5 PE=1 SV=1	MULTI-MSMS		JACB153_3	MCF7 R10K8	682.37	3	679.7	2036.08	43153.3	0.15409	-0.32106	-0.16698	679.7	682.706	81.278	31.096	0.84767	81.278	80.885	81.733	0		0	0	0	0.016571	1	29878	58.49	58.49	1	2.5513	1.1903	0
DVLVGADSVR	10	0	1	Unmodified	_DVLVGADSVR_			0	0	Q3KQZ2;O43760;K7EJ35	Q3KQZ2	Q3KQZ2	SYNGR2	Synaptogyrin-2	>tr|Q3KQZ2|Q3KQZ2_HUMAN Synaptogyrin OS=Homo sapiens GN=SYNGR2 PE=1 SV=1;>sp|O43760|SNG2_HUMAN Synaptogyrin-2 OS=Homo sapiens GN=SYNGR2 PE=1 SV=1;>tr|K7EJ35|K7EJ35_HUMAN Synaptogyrin 2, isoform CRA_a OS=Homo sapiens GN=SYNGR2 PE=1 SV=1	MULTI-MSMS		JACB153_3	MCF7 R10K8	520.78	2	515.78	1029.55	48343.7	-0.28905	0.61117	0.32213	516.283	520.784	34.069	15.356	0.57288	34.069	33.692	34.265	0		0	0	0	0.0082402	1	11497	69.979	39.367	1	2.6075	0.91165	0
AMGAAQVVVTDLSATR	16	0	1	Unmodified	_AMGAAQVVVTDLSATR_			0	0	Q00796;H0YLA4	Q00796	Q00796	SORD	Sorbitol dehydrogenase	>sp|Q00796|DHSO_HUMAN Sorbitol dehydrogenase OS=Homo sapiens GN=SORD PE=1 SV=4;>tr|H0YLA4|H0YLA4_HUMAN Sorbitol dehydrogenase OS=Homo sapiens GN=SORD PE=1 SV=1	MULTI-MSMS		JACB153_3	MCF7 R10K8	800.92	2	795.419	1588.82	41289.2	-0.58863	0.0077869	-0.58084	795.92	800.424	50.908	20.972	0.29038	50.908	50.74	51.03	0		0	0	0	9.4412e-08	1	18656	139.6	139.6	1	2.7466	1.6332	0
CLIEILASR	9	0	1	Unmodified	_CLIEILASR_			0	0	A6NN80;E5RK63;E5RJF5;E5RI05;P08133;P08133-2	A6NN80;P08133	A6NN80	ANXA6	Annexin;Annexin A6	>tr|A6NN80|A6NN80_HUMAN Annexin OS=Homo sapiens GN=ANXA6 PE=1 SV=3;>tr|E5RK63|E5RK63_HUMAN Annexin (Fragment) OS=Homo sapiens GN=ANXA6 PE=1 SV=1;>tr|E5RJF5|E5RJF5_HUMAN Annexin (Fragment) OS=Homo sapiens GN=ANXA6 PE=1 SV=2;>tr|E5RI05|E5RI05_HUMAN Annexin O	MULTI-MSMS		JACB153_3	MCF7 R10K8	542.81	2	537.802	1073.59	48789.2	-0.10603	-0.50879	-0.61482	537.802	542.807	53.748	21.919	0.3159	53.748	53.574	53.89	0		0	0	0	0.00064429	1	19826	123.88	123.88	1	2.9511	1.6712	0
LAGGDWFTSR	10	0	1	Unmodified	_LAGGDWFTSR_			0	0	P30153;F5H3X9;C9J9C1	P30153	P30153	PPP2R1A	Serine/threonine-protein phosphatase 2A 65 kDa regulatory subunit A alpha isoform	>sp|P30153|2AAA_HUMAN Serine/threonine-protein phosphatase 2A 65 kDa regulatory subunit A alpha isoform OS=Homo sapiens GN=PPP2R1A PE=1 SV=4;>tr|F5H3X9|F5H3X9_HUMAN Serine/threonine-protein phosphatase 2A 65 kDa regulatory subunit A alpha isoform OS=Homo s	MULTI-MSMS		JACB153_3	MCF7 R10K8	560.28	2	555.272	1108.53	46877.2	-0.10402	-0.15539	-0.25941	555.272	560.276	44.985	18.997	0.39046	44.985	44.798	45.188	0		0	0	0	0.0021704	1	16225	90.685	56.153	1	2.9992	1.0239	0
MDSTEPPYSQK	11	1	0	Unmodified	_MDSTEPPYSQK_			0	0	P68104;Q5VTE0	P68104	P68104	EEF1A1;EEF1A1P5	Elongation factor 1-alpha 1;Putative elongation factor 1-alpha-like 3	>sp|P68104|EF1A1_HUMAN Elongation factor 1-alpha 1 OS=Homo sapiens GN=EEF1A1 PE=1 SV=1;>sp|Q5VTE0|EF1A3_HUMAN Putative elongation factor 1-alpha-like 3 OS=Homo sapiens GN=EEF1A1P5 PE=5 SV=1	MULTI-MSMS		JACB153_3	MCF7 R10K8	645.79	2	641.785	1281.55	43338.9	-0.69012	-0.53201	-1.2221	641.784	645.792	21.18	11.062	0.39234	21.18	20.962	21.354	0		0	0	0	0.0037354	1	5826	86.911	86.911	1	3.0374	1.5322	0
EGQEIASVSDDHTCR	15	0	1	Unmodified	_EGQEIASVSDDHTCR_			0	0	Q8NFH4	Q8NFH4	Q8NFH4	NUP37	Nucleoporin Nup37	>sp|Q8NFH4|NUP37_HUMAN Nucleoporin Nup37 OS=Homo sapiens GN=NUP37 PE=1 SV=1	MULTI-MSMS		JACB153_3	MCF7 R10K8	571.92	3	568.581	1702.72	46623.8	0.11128	-0.84031	-0.72903	568.579	571.917	19.491	10.495	0.26011	19.491	19.346	19.606	0		0	0	0	2.3673e-05	1	5148	97.797	87.657	1	3.1016	2.0234	0
HSQFIGYPITLFVEK	15	1	0	Unmodified	_HSQFIGYPITLFVEK_			0	0	P07900-2;P07900;Q86U12;Q58FG0;G3V2J8	P07900-2	P07900-2	HSP90AA1;HSP90AA5P	Heat shock protein HSP 90-alpha;Putative heat shock protein HSP 90-alpha A5	>sp|P07900-2|HS90A_HUMAN Isoform 2 of Heat shock protein HSP 90-alpha OS=Homo sapiens GN=HSP90AA1;>sp|P07900|HS90A_HUMAN Heat shock protein HSP 90-alpha OS=Homo sapiens GN=HSP90AA1 PE=1 SV=5;>tr|Q86U12|Q86U12_HUMAN Full-length cDNA clone CS0CAP007YF18 of T	MULTI-MSMS		JACB153_3	MCF7 R10K8	596.33	3	593.654	1777.94	45428.4	-0.11642	-0.14624	-0.26266	593.654	596.326	61.27	24.426	1.1296	61.27	60.902	62.032	0		0	0	0	1.7392e-05	3	22752	105.17	105.17	1	3.102	0.7185	0
NGFVVLK	7	1	0	Unmodified	_NGFVVLK_			0	0	P63241-2;P63241;I3L504;I3L397;Q6IS14;Q9GZV4;C9J4W5;C9J7B5;F8WCJ1	P63241-2	P63241-2	EIF5A;EIF5AL1;EIF5A2	Eukaryotic translation initiation factor 5A-1;Eukaryotic translation initiation factor 5A-1-like;Eukaryotic translation initiation factor 5A-2	>sp|P63241-2|IF5A1_HUMAN Isoform 2 of Eukaryotic translation initiation factor 5A-1 OS=Homo sapiens GN=EIF5A;>sp|P63241|IF5A1_HUMAN Eukaryotic translation initiation factor 5A-1 OS=Homo sapiens GN=EIF5A PE=1 SV=2;>tr|I3L504|I3L504_HUMAN Eukaryotic translat	MULTI-MSMS		JACB153_3	MCF7 R10K8	393.24	2	388.737	775.459	58632	-0.63952	-0.1309	-0.77042	388.737	392.744	34.334	15.447	0.43377	34.334	34.08	34.514	0		0	0	0	0.042444	2	11598	54.408	54.408	1	3.1642	1.2496	0
FLFENQTPAHVYYR	14	0	1	Unmodified	_FLFENQTPAHVYYR_			0	0	O15042;E7ET15;O15042-2;O15042-3;C9JB80	O15042	O15042	U2SURP	U2 snRNP-associated SURP motif-containing protein	>sp|O15042|SR140_HUMAN U2 snRNP-associated SURP motif-containing protein OS=Homo sapiens GN=U2SURP PE=1 SV=2;>tr|E7ET15|E7ET15_HUMAN U2 snRNP-associated SURP motif-containing protein OS=Homo sapiens GN=U2SURP PE=1 SV=1;>sp|O15042-2|SR140_HUMAN Isoform 2 of	MULTI-MSMS		JACB153_3	MCF7 R10K8	599.3	3	595.63	1783.87	45955.4	0.0075502	0.3473	0.35485	596.297	598.967	43.993	18.663	0.3291	43.993	43.781	44.11	0		0	0	0	4.9424e-05	1	15853	108.59	84.753	1	3.3569	1.6599	0
SQEQEVLER	9	0	1	Unmodified	_SQEQEVLER_			0	0	Q9UKV3;Q9UKV3-5;E7EQT4;S4R3H4	Q9UKV3	Q9UKV3	ACIN1	Apoptotic chromatin condensation inducer in the nucleus	>sp|Q9UKV3|ACINU_HUMAN Apoptotic chromatin condensation inducer in the nucleus OS=Homo sapiens GN=ACIN1 PE=1 SV=2;>sp|Q9UKV3-5|ACINU_HUMAN Isoform 4 of Apoptotic chromatin condensation inducer in the nucleus OS=Homo sapiens GN=ACIN1;>tr|E7EQT4|E7EQT4_HUMAN	MULTI-MSMS		JACB153_3	MCF7 R10K8	564.28	2	559.278	1116.54	43841.9	0.027029	0.1917	0.21873	559.279	564.282	20.883	10.959	0.31637	20.883	20.727	21.044	0		0	0	0	0.0017711	1	5719	91.549	43.458	1	3.3889	2.8576	0
LTDCVVMRDPASK	13	1	1	Unmodified	_LTDCVVMRDPASK_			0	0	P22626;P22626-2	P22626	P22626	HNRNPA2B1	Heterogeneous nuclear ribonucleoproteins A2/B1	>sp|P22626|ROA2_HUMAN Heterogeneous nuclear ribonucleoproteins A2/B1 OS=Homo sapiens GN=HNRNPA2B1 PE=1 SV=2;>sp|P22626-2|ROA2_HUMAN Isoform A2 of Heterogeneous nuclear ribonucleoproteins A2/B1 OS=Homo sapiens GN=HNRNPA2B1	MULTI-MSMS		JACB153_3	MCF7 R10K8	503.92	3	497.915	1490.72	46682.2	-0.072552	1.6315	1.5589	498.25	503.923	25.968	12.655	0.32518	25.968	25.811	26.136	1.9073e-06		0	0	0	0.025991	1	7905	65.495	58.766	1	3.5159	4.4219	0
QDSAAVGFDYK	11	1	0	Unmodified	_QDSAAVGFDYK_			0	0	Q14247	Q14247	Q14247	CTTN	Src substrate cortactin	>sp|Q14247|SRC8_HUMAN Src substrate cortactin OS=Homo sapiens GN=CTTN PE=1 SV=2	MULTI-MSMS		JACB153_3	MCF7 R10K8	604.79	2	600.78	1199.55	45532.7	-0.32065	-0.43409	-0.75473	600.779	604.787	32.696	14.895	0.3909	32.696	32.499	32.89	0		0	0	0	0.0027197	1	10871	89.301	89.301	1	3.527	1.2609	0
ISHLPLVEELR	11	0	1	Unmodified	_ISHLPLVEELR_			0	0	P49736;H0Y8E6	P49736	P49736	MCM2	DNA replication licensing factor MCM2	>sp|P49736|MCM2_HUMAN DNA replication licensing factor MCM2 OS=Homo sapiens GN=MCM2 PE=1 SV=4;>tr|H0Y8E6|H0Y8E6_HUMAN DNA replication licensing factor MCM2 (Fragment) OS=Homo sapiens GN=MCM2 PE=1 SV=1	MULTI-MSMS		JACB153_3	MCF7 R10K8	439.26	3	435.922	1304.75	52183.8	-1.2277	1.1685	-0.05926	436.259	439.259	42.443	18.144	0.66024	42.443	42.097	42.757	0		0	0	0	0.011156	1	15195	69.451	69.451	1	3.5704	1.6972	0
IAQPGDHVSVTGIFLPILR	19	0	1	Unmodified	_IAQPGDHVSVTGIFLPILR_			0	0	P33993;P33993-3;P33993-2;C9J8M6	P33993	P33993	MCM7	DNA replication licensing factor MCM7	>sp|P33993|MCM7_HUMAN DNA replication licensing factor MCM7 OS=Homo sapiens GN=MCM7 PE=1 SV=4;>sp|P33993-3|MCM7_HUMAN Isoform 3 of DNA replication licensing factor MCM7 OS=Homo sapiens GN=MCM7;>sp|P33993-2|MCM7_HUMAN Isoform 2 of DNA replication licensing	MULTI-MSMS		JACB153_3	MCF7 R10K8	681.73	3	678.39	2032.15	42702.1	-0.29006	0.65149	0.36144	678.391	682.06	66.072	26.023	0.70985	66.072	65.857	66.567	0		0	0	0	9.1492e-05	1	24450	92.31	92.31	1	3.6112	1.4183	0
IASLEVENQSLR	12	0	1	Unmodified	_IASLEVENQSLR_			0	0	P29692-3;E9PL71;E9PN91;E9PRY8;P29692-2;P29692;E9PK01;E9PI39;E9PQ49;E9PL12;E9PPR1;H0YCK7;E9PIZ1;E9PMW7	P29692-3;E9PRY8	E9PRY8	EEF1D	Elongation factor 1-delta	>sp|P29692-3|EF1D_HUMAN Isoform 3 of Elongation factor 1-delta OS=Homo sapiens GN=EEF1D;>tr|E9PL71|E9PL71_HUMAN Elongation factor 1-delta (Fragment) OS=Homo sapiens GN=EEF1D PE=1 SV=1;>tr|E9PN91|E9PN91_HUMAN Elongation factor 1-delta OS=Homo sapiens GN=EEF	MULTI-MSMS		JACB153_3	MCF7 R10K8	684.87	2	679.867	1357.72	42576.2	-0.58024	-0.72288	-1.3031	680.366	684.871	35.91	15.972	0.43746	35.91	35.733	36.17	-3.8147e-06		0	0	0	5.2367e-08	1	12284	187.44	70.894	1	3.9164	1.0567	0
AFVRPSGTEDVVR	13	0	2	Unmodified	_AFVRPSGTEDVVR_			0	0	O95394-4;O95394-3;O95394;J3KN95;H0Y987;H0Y8I3	O95394-4	O95394-4	PGM3	Phosphoacetylglucosamine mutase	>sp|O95394-4|AGM1_HUMAN Isoform 3 of Phosphoacetylglucosamine mutase OS=Homo sapiens GN=PGM3;>sp|O95394-3|AGM1_HUMAN Isoform 2 of Phosphoacetylglucosamine mutase OS=Homo sapiens GN=PGM3;>sp|O95394|AGM1_HUMAN Phosphoacetylglucosamine mutase OS=Homo sapiens	MULTI-MSMS		JACB153_3	MCF7 R10K8	484.93	3	478.256	1431.75	51503.9	-0.49665	-0.59241	-1.0891	478.256	484.929	25.421	12.475	0.45152	25.421	25.182	25.634	0		0	0	0	0.00021719	1	7673	120.14	112.22	1	3.9353	5.0305	0
SVTAFFK	7	1	0	Unmodified	_SVTAFFK_			0	0	Q04637-9;Q04637-8;Q04637;E7EUU4;Q04637-3;E9PGM1;Q04637-4;E7EX73;Q04637-5;Q04637-7;Q04637-6	Q04637-9	Q04637-9	EIF4G1	Eukaryotic translation initiation factor 4 gamma 1	>sp|Q04637-9|IF4G1_HUMAN Isoform 9 of Eukaryotic translation initiation factor 4 gamma 1 OS=Homo sapiens GN=EIF4G1;>sp|Q04637-8|IF4G1_HUMAN Isoform 8 of Eukaryotic translation initiation factor 4 gamma 1 OS=Homo sapiens GN=EIF4G1;>sp|Q04637|IF4G1_HUMAN Euk	MULTI-MSMS		JACB153_3	MCF7 R10K8	404.23	2	400.221	798.428	54673.3	0.24951	0.3505	0.60001	400.222	404.228	37.596	16.533	0.41945	37.596	37.39	37.809	0		0	0	0	0.013513	1	13067	78.496	58.86	1	4.0875	1.6597	0
LDQLIYIPLPDEK	13	1	0	Unmodified	_LDQLIYIPLPDEK_			0	0	P55072	P55072	P55072	VCP	Transitional endoplasmic reticulum ATPase	>sp|P55072|TERA_HUMAN Transitional endoplasmic reticulum ATPase OS=Homo sapiens GN=VCP PE=1 SV=4	MULTI-MSMS		JACB153_3	MCF7 R10K8	783.44	2	778.932	1555.85	40762	-0.61662	0.12524	-0.49138	779.434	782.939	67.061	26.356	0.54539	67.061	66.819	67.364	0		0	0	0	0.0001361	1	24813	110.14	110.14	1	4.0902	1.1221	0
LYHDIAQQAFK	11	1	0	Unmodified	_LYHDIAQQAFK_			0	0	Q14152;F5H335	Q14152	Q14152	EIF3A	Eukaryotic translation initiation factor 3 subunit A	>sp|Q14152|EIF3A_HUMAN Eukaryotic translation initiation factor 3 subunit A OS=Homo sapiens GN=EIF3A PE=1 SV=1;>tr|F5H335|F5H335_HUMAN Eukaryotic translation initiation factor 3 subunit A OS=Homo sapiens GN=EIF3A PE=1 SV=1	MULTI-MSMS		JACB153_3	MCF7 R10K8	447.91	3	445.235	1332.68	52022.6	0.050314	-0.9621	-0.91179	445.235	447.906	29.208	13.734	0.38797	29.208	29.009	29.397	0		0	0	0	0.011564	1	9348	68.49	59.79	1	4.1811	1.3927	0
SLHDALCVIR	10	0	1	Unmodified	_SLHDALCVIR_			0	0	P48643;E9PCA1;B7ZAR1;E7ENZ3;P48643-2	P48643	P48643	CCT5	T-complex protein 1 subunit epsilon	>sp|P48643|TCPE_HUMAN T-complex protein 1 subunit epsilon OS=Homo sapiens GN=CCT5 PE=1 SV=1;>tr|E9PCA1|E9PCA1_HUMAN T-complex protein 1 subunit epsilon OS=Homo sapiens GN=CCT5 PE=1 SV=1;>tr|B7ZAR1|B7ZAR1_HUMAN T-complex protein 1 subunit epsilon OS=Homo sa	MULTI-MSMS		JACB153_3	MCF7 R10K8	398.55	3	395.213	1182.62	53984.1	-0.58208	0.078051	-0.50403	395.546	398.55	34.414	15.472	0.4651	34.414	34.241	34.706	0		0	0	0	0.0059879	1	11627	77.662	0	1	4.2564	1.5642	0
ELAGHTGYLSCCR	13	0	1	Unmodified	_ELAGHTGYLSCCR_			0	0	P62873;F6UT28;F6X3N5	P62873	P62873	GNB1	Guanine nucleotide-binding protein G(I)/G(S)/G(T) subunit beta-1	>sp|P62873|GBB1_HUMAN Guanine nucleotide-binding protein G(I)/G(S)/G(T) subunit beta-1 OS=Homo sapiens GN=GNB1 PE=1 SV=3;>tr|F6UT28|F6UT28_HUMAN Guanine nucleotide-binding protein G(I)/G(S)/G(T) subunit beta-1 (Fragment) OS=Homo sapiens GN=GNB1 PE=1 SV=1;>	MULTI-MSMS		JACB153_3	MCF7 R10K8	511.9	3	508.562	1522.67	48212.6	0.2387	-0.15286	0.085842	508.563	511.899	23.042	11.677	0.41761	23.042	22.801	23.219	-1.9073e-06		0	0	0	0.011363	1	6609	63.76	54.311	1	4.3283	1.8537	0
LFDFVNAK	8	1	0	Unmodified	_LFDFVNAK_			0	0	Q08945	Q08945	Q08945	SSRP1	FACT complex subunit SSRP1	>sp|Q08945|SSRP1_HUMAN FACT complex subunit SSRP1 OS=Homo sapiens GN=SSRP1 PE=1 SV=1	MULTI-MSMS		JACB153_3	MCF7 R10K8	481.27	2	477.258	952.502	51720	-0.36654	0.89394	0.52739	477.258	481.266	48.672	20.22	0.3277	48.672	48.486	48.814	0		0	0	0	0.0023596	1	17749	107.29	107.29	1	4.5217	1.7687	0
GDDLLPAGTEDYIHIR	16	0	1	Unmodified	_GDDLLPAGTEDYIHIR_			0	0	K7EM18;P41567;O60739	K7EM18	K7EM18	EIF1;EIF1B	Eukaryotic translation initiation factor 1;Eukaryotic translation initiation factor 1b	>tr|K7EM18|K7EM18_HUMAN Eukaryotic translation initiation factor 1 OS=Homo sapiens GN=EIF1 PE=1 SV=1;>sp|P41567|EIF1_HUMAN Eukaryotic translation initiation factor 1 OS=Homo sapiens GN=EIF1 PE=1 SV=1;>sp|O60739|EIF1B_HUMAN Eukaryotic translation initiation	MULTI-MSMS		JACB153_3	MCF7 R10K8	599.3	3	595.632	1783.87	44977.9	-0.39171	-1.2691	-1.6608	595.965	598.967	52.278	21.427	0.38545	52.278	52.051	52.437	0		0	0	0	5.7242e-06	1	19211	112.96	103.55	1	4.543	1.8018	0
DHYIPNTLNPVFGR	14	0	1	Unmodified	_DHYIPNTLNPVFGR_			0	0	F8W8J4;Q9NZM1;Q9NZM1-6;C9JCN0;Q9NZM1-3;Q9NZM1-2;H0YD14	F8W8J4	F8W8J4	MYOF	Myoferlin	>tr|F8W8J4|F8W8J4_HUMAN Myoferlin OS=Homo sapiens GN=MYOF PE=1 SV=1;>sp|Q9NZM1|MYOF_HUMAN Myoferlin OS=Homo sapiens GN=MYOF PE=1 SV=1;>sp|Q9NZM1-6|MYOF_HUMAN Isoform 6 of Myoferlin OS=Homo sapiens GN=MYOF;>tr|C9JCN0|C9JCN0_HUMAN Myoferlin OS=Homo sapiens G	MULTI-MSMS		JACB153_3	MCF7 R10K8	551.95	3	548.283	1641.83	47831.8	-0.21223	-0.49617	-0.70839	548.616	551.619	48.57	20.19	0.51524	48.57	48.272	48.787	0		0	0	0	7.2745e-05	1	17720	96.866	93.539	1	4.5545	1.9418	0
NIELAVMR	8	0	1	Unmodified	_NIELAVMR_			0	0	O14818;O14818-2;H0Y586	O14818	O14818	PSMA7	Proteasome subunit alpha type-7	>sp|O14818|PSA7_HUMAN Proteasome subunit alpha type-7 OS=Homo sapiens GN=PSMA7 PE=1 SV=1;>sp|O14818-2|PSA7_HUMAN Isoform 2 of Proteasome subunit alpha type-7 OS=Homo sapiens GN=PSMA7;>tr|H0Y586|H0Y586_HUMAN Proteasome subunit alpha type-7 (Fragment) OS=Hom	MULTI-SECPEP		JACB153_3	MCF7 R10K8	477.94	2	473.263	944.511	48709.7	0.16083	0.76843	0.92926	473.264	478.268	40.678	17.564	0.41279	40.678	40.445	40.857	-3.8147e-06		0	0	0	0.040111	1	14447	58.981	71.223	1	4.5824	1.7543	0
LLIVSTTPYSEK	12	1	0	Unmodified	_LLIVSTTPYSEK_			0	0	Q9Y230;B3KQ59;M0R0Y3	Q9Y230	Q9Y230	RUVBL2	RuvB-like 2	>sp|Q9Y230|RUVB2_HUMAN RuvB-like 2 OS=Homo sapiens GN=RUVBL2 PE=1 SV=3;>tr|B3KQ59|B3KQ59_HUMAN RuvB-like 2 OS=Homo sapiens GN=RUVBL2 PE=1 SV=1;>tr|M0R0Y3|M0R0Y3_HUMAN RuvB-like 2 OS=Homo sapiens GN=RUVBL2 PE=1 SV=1	MULTI-SECPEP		JACB153_3	MCF7 R10K8	680.85	2	675.879	1349.74	42658.2	0.20991	-0.79762	-0.58771	676.381	679.886	43.423	18.478	0.29329	43.423	43.276	43.57	0		0	0	0	0.090417	1	15567	33.195	30.054	1	4.626	1.4993	0
FVEGLPINDFSR	12	0	1	Unmodified	_FVEGLPINDFSR_			0	0	P40925-3;P40925;P40925-2;B9A041;B8ZZ51	P40925-3	P40925-3	MDH1	Malate dehydrogenase, cytoplasmic	>sp|P40925-3|MDHC_HUMAN Isoform 3 of Malate dehydrogenase, cytoplasmic OS=Homo sapiens GN=MDH1;>sp|P40925|MDHC_HUMAN Malate dehydrogenase, cytoplasmic OS=Homo sapiens GN=MDH1 PE=1 SV=4;>sp|P40925-2|MDHC_HUMAN Isoform 2 of Malate dehydrogenase, cytoplasmic	MULTI-MSMS		JACB153_3	MCF7 R10K8	702.36	2	697.359	1392.7	41312.8	-0.24272	1.0134	0.77067	697.362	702.363	55.644	22.547	0.52682	55.644	55.428	55.955	0		0	0	0	0.00035378	1	20535	94.122	85.014	1	4.6426	1.4491	0
GGCPGGEATLSQPPPR	16	0	1	Unmodified	_GGCPGGEATLSQPPPR_			0	0	P20290	P20290	P20290	BTF3	Transcription factor BTF3	>sp|P20290|BTF3_HUMAN Transcription factor BTF3 OS=Homo sapiens GN=BTF3 PE=1 SV=1	MULTI-MSMS		JACB153_3	MCF7 R10K8	795.88	2	790.878	1579.74	39785.3	-1.0209	0.54224	-0.47868	791.38	795.883	24.312	12.105	0.47758	24.312	23.994	24.472	0		0	0	0	0.0010201	1	7190	83.966	83.966	1	4.9641	4.6626	0
EVEERPAPTPWGSK	14	1	1	Unmodified	_EVEERPAPTPWGSK_			0	0	O15143	O15143	O15143	ARPC1B	Actin-related protein 2/3 complex subunit 1B	>sp|O15143|ARC1B_HUMAN Actin-related protein 2/3 complex subunit 1B OS=Homo sapiens GN=ARPC1B PE=1 SV=3	MULTI-MSMS		JACB153_3	MCF7 R10K8	534.27	3	528.267	1581.78	48097.8	0.15281	-0.42128	-0.26847	528.266	534.274	26.226	12.743	0.41835	26.226	26.012	26.43	0		0	0	0	0.00014277	1	8012	103.83	103.83	1	5.129	6.4506	0
FQSAAIGALQEASEAYLVGLFEDTNLCAIHAK	32	1	0	Unmodified	_FQSAAIGALQEASEAYLVGLFEDTNLCAIHAK_			0	0	P84243;K7EK07	P84243	P84243	H3F3A	Histone H3.3	>sp|P84243|H33_HUMAN Histone H3.3 OS=Homo sapiens GN=H3F3A PE=1 SV=2;>tr|K7EK07|K7EK07_HUMAN Histone H3 (Fragment) OS=Homo sapiens GN=H3F3B PE=1 SV=1	MULTI-MSMS		JACB153_3	MCF7 R10K8	1149.91	3	1146.57	3436.7	32812.3	-0.57697	-1.801	-2.378	1147.57	1149.58	92.738	34.914	0.64626	92.738	92.439	93.085	0		0	0	0	1.0968e-07	1	33873	112.35	112.35	1	5.157	3.2195	0
SLEAQVAHADQQLR	14	0	1	Unmodified	_SLEAQVAHADQQLR_			0	0	Q14980;Q14980-2;Q14980-3;Q14980-4;Q14980-5;H0YFY6;K4DIE0	Q14980	Q14980	NUMA1	Nuclear mitotic apparatus protein 1	>sp|Q14980|NUMA1_HUMAN Nuclear mitotic apparatus protein 1 OS=Homo sapiens GN=NUMA1 PE=1 SV=2;>sp|Q14980-2|NUMA1_HUMAN Isoform 2 of Nuclear mitotic apparatus protein 1 OS=Homo sapiens GN=NUMA1;>sp|Q14980-3|NUMA1_HUMAN Isoform Numa-m of Nuclear mitotic appa	MULTI-MSMS		JACB153_3	MCF7 R10K8	525.94	3	522.606	1564.8	49434.4	0.1379	-0.3787	-0.2408	522.606	525.942	30.828	14.273	0.40174	30.828	30.64	31.042	-1.9073e-06		0	0	0	0.0053464	1	10031	68.83	48.368	1	5.3098	2.4939	0
FIHDQTSPNPK	11	1	0	Unmodified	_FIHDQTSPNPK_			0	0	P53007;B4DP62	P53007	P53007	SLC25A1	Tricarboxylate transport protein, mitochondrial	>sp|P53007|TXTP_HUMAN Tricarboxylate transport protein, mitochondrial OS=Homo sapiens GN=SLC25A1 PE=1 SV=2;>tr|B4DP62|B4DP62_HUMAN Solute carrier family 25 (Mitochondrial carrier; citrate transporter), member 1, isoform CRA_b OS=Homo sapiens GN=SLC25A1 PE=	MULTI-MSMS		JACB153_3	MCF7 R10K8	431.22	3	428.551	1282.63	53380.7	0.38198	-0.3053	0.076684	428.551	431.222	15.066	9.0229	0.55005	15.066	14.854	15.404	0		0	0	0	0.00048471	1	3483	122.7	120.56	1	5.4835	1.4677	0
EISEVFPDQFIHLGGDEVEFK	21	1	0	Unmodified	_EISEVFPDQFIHLGGDEVEFK_			0	0	P07686;Q5URX0;H0Y9B6	P07686	P07686	HEXB	Beta-hexosaminidase subunit beta;Beta-hexosaminidase subunit beta chain B;Beta-hexosaminidase subunit beta chain A	>sp|P07686|HEXB_HUMAN Beta-hexosaminidase subunit beta OS=Homo sapiens GN=HEXB PE=1 SV=3;>tr|Q5URX0|Q5URX0_HUMAN Beta-hexosaminidase subunit beta OS=Homo sapiens GN=HEL-248 PE=1 SV=1;>tr|H0Y9B6|H0Y9B6_HUMAN Beta-hexosaminidase subunit beta (Fragment) OS=Ho	MULTI-MSMS		JACB153_3	MCF7 R10K8	815.4	3	812.397	2434.17	38134.9	-0.49171	0.34808	-0.14363	813.4	815.402	68.642	26.883	0.48815	68.642	68.394	68.882	7.6294e-06		0	0	0	3.5518e-08	1	25400	123.53	123.53	1	5.5391	2.0664	0
SGSGTMNLGGSLTR	14	0	1	Unmodified	_SGSGTMNLGGSLTR_			0	0	B1AK88;P47756-2;B1AK87;P47756;B1AK85;F6USW4	B1AK88	B1AK88	CAPZB	F-actin-capping protein subunit beta	>tr|B1AK88|B1AK88_HUMAN Capping protein (Actin filament) muscle Z-line, beta, isoform CRA_d OS=Homo sapiens GN=CAPZB PE=1 SV=1;>sp|P47756-2|CAPZB_HUMAN Isoform 2 of F-actin-capping protein subunit beta OS=Homo sapiens GN=CAPZB;>tr|B1AK87|B1AK87_HUMAN Cappi	MULTI-MSMS		JACB153_3	MCF7 R10K8	674.33	2	669.328	1336.64	42163.4	-0.52466	-0.63008	-1.1547	669.326	674.331	32.346	14.784	0.37091	32.346	32.159	32.53	0		0	0	0	6.6658e-05	1	10696	99.927	99.927	1	5.5522	2.0598	0
LILDSAR	7	0	1	Unmodified	_LILDSAR_			0	0	P29401-2;P29401;B4E022	P29401-2	P29401-2	TKT	Transketolase	>sp|P29401-2|TKT_HUMAN Isoform 2 of Transketolase OS=Homo sapiens GN=TKT;>sp|P29401|TKT_HUMAN Transketolase OS=Homo sapiens GN=TKT PE=1 SV=3;>tr|B4E022|B4E022_HUMAN Transketolase OS=Homo sapiens GN=TKT PE=1 SV=1	MULTI-MSMS		JACB153_3	MCF7 R10K8	399.24	2	394.237	786.46	55058.6	-0.11287	0.16346	0.050593	394.239	399.241	28.209	13.406	0.52306	28.209	27.994	28.517	0		0	0	0	0.038916	1	8888	55.676	6.3176	1	5.5742	1.8101	0
NALLQLTDSQIADVAR	16	0	1	Unmodified	_NALLQLTDSQIADVAR_			0	0	O75643;B4E0P5	O75643	O75643	SNRNP200	U5 small nuclear ribonucleoprotein 200 kDa helicase	>sp|O75643|U520_HUMAN U5 small nuclear ribonucleoprotein 200 kDa helicase OS=Homo sapiens GN=SNRNP200 PE=1 SV=2;>tr|B4E0P5|B4E0P5_HUMAN U5 small nuclear ribonucleoprotein 200 kDa helicase OS=Homo sapiens GN=SNRNP200 PE=1 SV=1	MULTI-MSMS		JACB153_3	MCF7 R10K8	869.97	2	864.468	1726.92	38077.3	-0.59951	2.8762	2.2766	864.969	869.974	59.298	23.767	0.60673	59.298	59.084	59.69	0		0	0	0	2.8402e-09	1	21963	169.25	150.49	1	5.9668	3.1049	0
NNLNPVWRPFK	11	1	1	Unmodified	_NNLNPVWRPFK_			0	0	O75131;E5RG68;H0YB26	O75131	O75131	CPNE3	Copine-3	>sp|O75131|CPNE3_HUMAN Copine-3 OS=Homo sapiens GN=CPNE3 PE=1 SV=1;>tr|E5RG68|E5RG68_HUMAN Copine-3 (Fragment) OS=Homo sapiens GN=CPNE3 PE=1 SV=1;>tr|H0YB26|H0YB26_HUMAN Copine-3 (Fragment) OS=Homo sapiens GN=CPNE3 PE=1 SV=1	MULTI-MSMS		JACB153_3	MCF7 R10K8	468.26	3	462.254	1383.74	51398.2	-0.595	0.88094	0.28594	462.255	468.262	39.331	17.107	0.49706	39.331	39.003	39.5	0		0	0	0	0.021809	1	13827	74.533	74.533	1	6.327	7.9573	0
LPVDIAYK	8	1	0	Unmodified	_LPVDIAYK_			0	0	P15924;P15924-3;P15924-2	P15924	P15924	DSP	Desmoplakin	>sp|P15924|DESP_HUMAN Desmoplakin OS=Homo sapiens GN=DSP PE=1 SV=3;>sp|P15924-3|DESP_HUMAN Isoform DSPIa of Desmoplakin OS=Homo sapiens GN=DSP;>sp|P15924-2|DESP_HUMAN Isoform DPII of Desmoplakin OS=Homo sapiens GN=DSP	MULTI-MSMS		JACB153_3	MCF7 R10K8	463.77	2	459.768	917.522	50968.9	-0.28468	0.95914	0.67447	459.768	463.776	32.861	14.952	0.33374	32.861	32.697	33.031	0		0	0	0	0.012199	1	10967	63.419	0	1	6.7092	2.1288	0
ANHFFTVTDPR	11	0	1	Unmodified	_ANHFFTVTDPR_			0	0	Q9H9B4;D6RFI0;S4R2X2;D6RDG7;D6RAE9	Q9H9B4	Q9H9B4	SFXN1	Sideroflexin-1	>sp|Q9H9B4|SFXN1_HUMAN Sideroflexin-1 OS=Homo sapiens GN=SFXN1 PE=1 SV=4;>tr|D6RFI0|D6RFI0_HUMAN Sideroflexin-1 (Fragment) OS=Homo sapiens GN=SFXN1 PE=1 SV=2;>tr|S4R2X2|S4R2X2_HUMAN Sideroflexin-1 OS=Homo sapiens GN=SFXN1 PE=1 SV=1;>tr|D6RDG7|D6RDG7_HUMAN	MULTI-MSMS		JACB153_3	MCF7 R10K8	438.89	3	435.551	1303.63	53403.4	-0.4412	0.12609	-0.31511	435.886	438.887	31.176	14.391	0.43831	31.176	30.936	31.375	0		0	0	0	0.075003	1	10204	51.286	51.286	1	6.7518	3.3284	0
RLDEELEDAEK	11	1	1	Unmodified	_RLDEELEDAEK_			0	0	Q15008;C9IZE4;Q15008-2;E9PHI9;C9J0E9;C9J7B7	Q15008	Q15008	PSMD6	26S proteasome non-ATPase regulatory subunit 6	>sp|Q15008|PSMD6_HUMAN 26S proteasome non-ATPase regulatory subunit 6 OS=Homo sapiens GN=PSMD6 PE=1 SV=1;>tr|C9IZE4|C9IZE4_HUMAN 26S proteasome non-ATPase regulatory subunit 6 OS=Homo sapiens GN=PSMD6 PE=1 SV=1;>sp|Q15008-2|PSMD6_HUMAN Isoform 2 of 26S pro	MULTI-MSMS		JACB153_3	MCF7 R10K8	682.84	2	673.825	1345.64	41138.9	-0.13709	-0.59854	-0.73563	673.825	682.836	26.433	12.815	0.44454	26.433	26.214	26.659	-1.9073e-06		0	0	0	0.00046723	1	8121	119.39	119.39	1	6.7892	8.5387	0
FLGTEPEPDAVGLDSGHIR	19	0	1	Unmodified	_FLGTEPEPDAVGLDSGHIR_			0	0	Q16762	Q16762	Q16762	TST	Thiosulfate sulfurtransferase	>sp|Q16762|THTR_HUMAN Thiosulfate sulfurtransferase OS=Homo sapiens GN=TST PE=1 SV=4	MULTI-MSMS		JACB153_3	MCF7 R10K8	674.34	3	670.669	2008.99	42709.2	-0.18406	0.16565	-0.018406	671.003	674.005	43.994	18.663	0.45876	43.994	43.729	44.188	0		0	0	0	2.3846e-07	1	15805	112.82	112.82	1	6.8634	2.5208	0
VDINAPDVEVQGK	13	1	0	Unmodified	_VDINAPDVEVQGK_			0	0	Q09666	Q09666	Q09666	AHNAK	Neuroblast differentiation-associated protein AHNAK	>sp|Q09666|AHNK_HUMAN Neuroblast differentiation-associated protein AHNAK OS=Homo sapiens GN=AHNAK PE=1 SV=2	MULTI-MSMS		JACB153_3	MCF7 R10K8	696.36	2	692.359	1382.7	40531.6	-0.32705	-1.2764	-1.6034	692.358	696.365	36.439	16.144	0.3514	36.439	36.216	36.567	0		0	0	0	0.0072852	1	12552	74.769	55.273	1	7.1723	2.407	0
VQIEHISSLIK	11	1	0	Unmodified	_VQIEHISSLIK_			0	0	O00231-2;O00231	O00231-2	O00231-2	PSMD11	26S proteasome non-ATPase regulatory subunit 11	>sp|O00231-2|PSD11_HUMAN Isoform 2 of 26S proteasome non-ATPase regulatory subunit 11 OS=Homo sapiens GN=PSMD11;>sp|O00231|PSD11_HUMAN 26S proteasome non-ATPase regulatory subunit 11 OS=Homo sapiens GN=PSMD11 PE=1 SV=3	MULTI-MSMS		JACB153_3	MCF7 R10K8	425.59	3	422.919	1265.73	53315	0.46109	1.3619	1.8229	422.919	425.591	37.199	16.401	0.32791	37.199	37.043	37.371	0		0	0	0	0.012511	1	12896	66.262	36.455	1	7.3166	2.5529	0
FPSLLTHNENMVAK	14	1	0	Unmodified	_FPSLLTHNENMVAK_			0	0	P62906	P62906	P62906	RPL10A	60S ribosomal protein L10a	>sp|P62906|RL10A_HUMAN 60S ribosomal protein L10a OS=Homo sapiens GN=RPL10A PE=1 SV=2	MULTI-MSMS		JACB153_3	MCF7 R10K8	537.28	3	534.277	1599.81	47562	-0.53248	0.81691	0.28443	534.614	536.948	39.195	17.063	0.73986	39.195	38.835	39.575	0		0	0	0	0.00074279	1	13683	90.707	90.707	1	7.3664	1.9493	0
AAHSEGNTTAGLDMR	15	0	1	Unmodified	_AAHSEGNTTAGLDMR_			0	0	P78371;P78371-2	P78371	P78371	CCT2	T-complex protein 1 subunit beta	>sp|P78371|TCPB_HUMAN T-complex protein 1 subunit beta OS=Homo sapiens GN=CCT2 PE=1 SV=4;>sp|P78371-2|TCPB_HUMAN Isoform 2 of T-complex protein 1 subunit beta OS=Homo sapiens GN=CCT2	MULTI-MSMS		JACB153_3	MCF7 R10K8	514.24	3	510.904	1529.69	48345.2	0.31957	-0.90801	-0.58844	511.236	514.24	18.571	10.193	0.3922	18.571	18.394	18.786	0		0	0	0	0.0497	1	4789	54.501	52.139	1	7.6255	3.0666	0
NALVSHLDGTTPVCEDIGR	19	0	1	Unmodified	_NALVSHLDGTTPVCEDIGR_			0	0	P31930	P31930	P31930	UQCRC1	Cytochrome b-c1 complex subunit 1, mitochondrial	>sp|P31930|QCR1_HUMAN Cytochrome b-c1 complex subunit 1, mitochondrial OS=Homo sapiens GN=UQCRC1 PE=1 SV=3	MULTI-MSMS		JACB153_3	MCF7 R10K8	689.01	3	685.337	2052.99	41793.4	-0.29405	0.54932	0.25528	685.337	689.008	40.332	17.443	0.38818	40.332	40.095	40.484	0		0	0	0	1.0707e-12	1	14233	156.39	156.39	1	7.7664	2.6168	0
AGALNSNDAFVLK	13	1	0	Unmodified	_AGALNSNDAFVLK_			0	0	P06396;P06396-3;P06396-4;P06396-2;CON__Q3SX14;Q5T0H9;Q5T0H8;Q5T0H7	P06396	P06396	GSN	Gelsolin	>sp|P06396|GELS_HUMAN Gelsolin OS=Homo sapiens GN=GSN PE=1 SV=1;>sp|P06396-3|GELS_HUMAN Isoform 3 of Gelsolin OS=Homo sapiens GN=GSN;>sp|P06396-4|GELS_HUMAN Isoform 4 of Gelsolin OS=Homo sapiens GN=GSN;>sp|P06396-2|GELS_HUMAN Isoform 2 of Gelsolin OS=Homo	MULTI-MSMS		JACB153_3	MCF7 R10K8	664.36	2	660.351	1318.69	43360.2	-1.4543	0.72591	-0.72842	660.352	664.359	42.424	18.144	0.7201	42.424	42.037	42.757	0		0	0	0	0.00011286	1	15150	115.14	90.283	1	7.8882	2.1832	0
IFVGGLSPDTPEEK	14	1	0	Unmodified	_IFVGGLSPDTPEEK_			0	0	Q14103;Q14103-2;Q14103-3;B4DTC3;Q14103-4;H0Y8G5;H0YA96;D6RAF8;D6RF44;F5H6R6	Q14103	Q14103	HNRNPD	Heterogeneous nuclear ribonucleoprotein D0	>sp|Q14103|HNRPD_HUMAN Heterogeneous nuclear ribonucleoprotein D0 OS=Homo sapiens GN=HNRNPD PE=1 SV=1;>sp|Q14103-2|HNRPD_HUMAN Isoform 2 of Heterogeneous nuclear ribonucleoprotein D0 OS=Homo sapiens GN=HNRNPD;>sp|Q14103-3|HNRPD_HUMAN Isoform 3 of Heterogen	MULTI-MSMS		JACB153_3	MCF7 R10K8	748.89	2	744.883	1487.75	40278.8	-0.13096	-0.74917	-0.88013	744.883	748.889	43.239	18.414	0.48204	43.239	43.039	43.521	0		0	0	0	4.3922e-07	1	15493	159	159	1	7.9478	1.8628	0
DGVLEEQIER	10	0	1	Unmodified	_DGVLEEQIER_			0	0	Q09161;X6R941	Q09161	Q09161	NCBP1	Nuclear cap-binding protein subunit 1	>sp|Q09161|NCBP1_HUMAN Nuclear cap-binding protein subunit 1 OS=Homo sapiens GN=NCBP1 PE=1 SV=1;>tr|X6R941|X6R941_HUMAN Nuclear cap-binding protein subunit 1 (Fragment) OS=Homo sapiens GN=NCBP1 PE=4 SV=1	MULTI-SECPEP		JACB153_3	MCF7 R10K8	598.85	2	594.299	1186.58	43531.8	0.29263	-3.1792	-2.8866	594.297	599.301	36.948	16.314	0.38977	36.948	36.737	37.127	0		0	0	0	0.13509	1	12772	24.853	23.706	1	7.9849	3.4196	0
STGEAFVQFASK	12	1	0	Unmodified	_STGEAFVQFASK_			0	0	P31942;P31942-2;P31942-3	P31942	P31942	HNRNPH3	Heterogeneous nuclear ribonucleoprotein H3	>sp|P31942|HNRH3_HUMAN Heterogeneous nuclear ribonucleoprotein H3 OS=Homo sapiens GN=HNRNPH3 PE=1 SV=2;>sp|P31942-2|HNRH3_HUMAN Isoform 2 of Heterogeneous nuclear ribonucleoprotein H3 OS=Homo sapiens GN=HNRNPH3;>sp|P31942-3|HNRH3_HUMAN Isoform 3 of Heterog	MULTI-MSMS		JACB153_3	MCF7 R10K8	640.33	2	636.317	1270.62	43611.7	-0.30514	0.92693	0.62179	636.317	640.325	40.452	17.485	0.48609	40.452	40.155	40.641	0		0	0	0	8.6694e-05	1	14292	134.08	134.08	1	8.0118	2.6185	0
GTGELTQLLNSLCTAVK	17	1	0	Unmodified	_GTGELTQLLNSLCTAVK_			0	0	P09467	P09467	P09467	FBP1	Fructose-1,6-bisphosphatase 1	>sp|P09467|F16P1_HUMAN Fructose-1,6-bisphosphatase 1 OS=Homo sapiens GN=FBP1 PE=1 SV=5	MULTI-MSMS		JACB153_3	MCF7 R10K8	907.49	2	902.977	1803.94	36635.4	-0.3186	0.18713	-0.13147	903.983	906.984	75.138	29.046	0.61771	75.138	74.868	75.486	0		0	0	0	8.2589e-11	1	27711	183.7	174.6	1	8.1784	2.4286	0
VILEIDNAR	9	0	1	Unmodified	_VILEIDNAR_			0	0	CON__P13646-1	CON__P13646-1	CON__P13646-1			>P13646-1 SWISS-PROT:P13646-1 Tax_Id=9606 Gene_Symbol=KRT13 Isoform 1 of Keratin, type I cytoskeletal 13	MULTI-MSMS		JACB153_3	MCF7 R10K8	526.8	2	521.798	1041.58	47798.9	-0.30784	0.76494	0.4571	521.799	526.802	39.298	17.099	0.40144	39.298	39.076	39.478	0		0	0	0	0.0015144	1	13813	92.439	52.088	1	8.2327	2.7771	0
NLQEEIDALESR	12	0	1	Unmodified	_NLQEEIDALESR_			0	0	E9PQY2;Q9NQP4	E9PQY2	E9PQY2	PFDN4	Prefoldin subunit 4	>tr|E9PQY2|E9PQY2_HUMAN Prefoldin subunit 4 OS=Homo sapiens GN=PFDN4 PE=1 SV=1;>sp|Q9NQP4|PFD4_HUMAN Prefoldin subunit 4 OS=Homo sapiens GN=PFDN4 PE=1 SV=1	MULTI-MSMS		JACB153_3	MCF7 R10K8	714.36	2	708.852	1415.69	40633.6	-0.29577	0.45899	0.16322	708.853	713.856	55.209	22.406	0.51202	55.209	54.899	55.411	0		0	0	0	2.425e-06	1	20358	166.04	163	1	9.0364	3.6244	0
GDYPLEAVR	9	0	1	Unmodified	_GDYPLEAVR_			0	0	P14618;P14618-3;P14618-2;H3BTN5;Q504U3	P14618;P14618-2	P14618	PKM2	Pyruvate kinase isozymes M1/M2;Pyruvate kinase	>sp|P14618|KPYM_HUMAN Pyruvate kinase PKM OS=Homo sapiens GN=PKM PE=1 SV=4;>sp|P14618-3|KPYM_HUMAN Isoform 3 of Pyruvate kinase PKM OS=Homo sapiens GN=PKM;>sp|P14618-2|KPYM_HUMAN Isoform M1 of Pyruvate kinase PKM OS=Homo sapiens GN=PKM;>tr|H3BTN5|H3BTN5_HU	MULTI-MSMS		JACB153_3	MCF7 R10K8	515.27	2	510.261	1018.51	48207.2	-0.19534	-0.077751	-0.27309	510.759	515.266	34.528	15.507	0.59978	34.528	34.195	34.794	0		0	0	0	0.014477	1	11769	61.65	61.65	1	9.0401	2.1208	0
IKQEILPEER	10	1	1	Unmodified	_IKQEILPEER_			0	0	O75534-4;O75534-3;O75534;O75534-2	O75534-4	O75534-4	CSDE1	Cold shock domain-containing protein E1	>sp|O75534-4|CSDE1_HUMAN Isoform 4 of Cold shock domain-containing protein E1 OS=Homo sapiens GN=CSDE1;>sp|O75534-3|CSDE1_HUMAN Isoform 3 of Cold shock domain-containing protein E1 OS=Homo sapiens GN=CSDE1;>sp|O75534|CSDE1_HUMAN Cold shock domain-containin	MULTI-MSMS		JACB153_3	MCF7 R10K8	424.91	3	418.907	1253.7	54748.8	-0.25209	0.29173	0.039647	418.906	424.914	23.571	11.859	0.21916	23.571	23.449	23.669	0		0	0	0	0.024154	1	6842	64.103	49.227	1	9.0557	11.389	0
TVTATFGYPFR	11	0	1	Unmodified	_TVTATFGYPFR_			0	0	Q16563;Q16563-2;C9JYN0	Q16563	Q16563	SYPL1	Synaptophysin-like protein 1	>sp|Q16563|SYPL1_HUMAN Synaptophysin-like protein 1 OS=Homo sapiens GN=SYPL1 PE=1 SV=1;>sp|Q16563-2|SYPL1_HUMAN Isoform 2 of Synaptophysin-like protein 1 OS=Homo sapiens GN=SYPL1;>tr|C9JYN0|C9JYN0_HUMAN Synaptophysin-like protein 1 OS=Homo sapiens GN=SYPL1	MULTI-MSMS		JACB153_3	MCF7 R10K8	635.33	2	630.325	1258.63	44437.1	-0.063758	0.30272	0.23896	630.326	635.329	50.73	20.909	0.65919	50.73	50.397	51.056	0		0	0	0	0.00022056	1	18553	141.93	141.93	1	9.123	3.1586	0
FSWFAGEK	8	1	0	Unmodified	_FSWFAGEK_			0	0	P21266	P21266	P21266	GSTM3	Glutathione S-transferase Mu 3	>sp|P21266|GSTM3_HUMAN Glutathione S-transferase Mu 3 OS=Homo sapiens GN=GSTM3 PE=1 SV=3	MULTI-MSMS		JACB153_3	MCF7 R10K8	490.24	2	486.235	970.455	50280.6	-0.40473	0.25231	-0.15242	486.234	490.242	46.715	19.571	0.53758	46.715	46.405	46.943	0		0	0	0	0.0025661	1	16946	97.431	30.399	1	9.1976	3.0938	0
EDGQEYAQVIK	11	1	0	Unmodified	_EDGQEYAQVIK_			0	0	P47813;O14602;A6NJH9	P47813	P47813	EIF1AX;EIF1AY	Eukaryotic translation initiation factor 1A, X-chromosomal;Eukaryotic translation initiation factor 1A, Y-chromosomal	>sp|P47813|IF1AX_HUMAN Eukaryotic translation initiation factor 1A, X-chromosomal OS=Homo sapiens GN=EIF1AX PE=1 SV=2;>sp|O14602|IF1AY_HUMAN Eukaryotic translation initiation factor 1A, Y-chromosomal OS=Homo sapiens GN=EIF1AY PE=1 SV=4;>tr|A6NJH9|A6NJH9_HU	MULTI-MSMS		JACB153_3	MCF7 R10K8	644.32	2	640.312	1278.61	42719.2	-0.58651	2.9101	2.3236	640.312	644.319	31.576	14.522	0.34533	31.576	31.375	31.72	0		0	0	0	0.011727	1	10391	68.107	46.436	1	9.4593	3.1447	0
STELLIR	7	0	1	Unmodified	_STELLIR_			0	0	Q71DI3;K7ES00;Q16695;B4DEB1;K7EMV3;Q5TEC6;Q6NXT2;K7EP01;P84243;K7EK07;P68431	Q71DI3;P84243;P68431	P84243	HIST2H3A;HIST3H3;H3F3A;HIST2H3PS2;H3F3C;HIST1H3A	Histone H3.2;Histone H3.1t;Histone H3;Histone H3.3C;Histone H3.3;Histone H3.1	>sp|Q71DI3|H32_HUMAN Histone H3.2 OS=Homo sapiens GN=HIST2H3A PE=1 SV=3;>tr|K7ES00|K7ES00_HUMAN Histone H3.3 (Fragment) OS=Homo sapiens GN=H3F3B PE=1 SV=1;>sp|Q16695|H31T_HUMAN Histone H3.1t OS=Homo sapiens GN=HIST3H3 PE=1 SV=3;>tr|B4DEB1|B4DEB1_HUMAN Hist	MULTI-MSMS		JACB153_3	MCF7 R10K8	421.25	2	416.25	830.486	54206.9	-0.026059	-0.1898	-0.21586	416.25	421.254	31.618	14.539	0.37022	31.618	31.44	31.81	0		0	0	0	0.0085079	1	10370	91.065	36.516	1	9.5826	3.2076	0
WLAPDGLIFPDR	12	0	1	Unmodified	_WLAPDGLIFPDR_			0	0	Q99873-4;H7C2I1;Q99873;Q99873-2;Q99873-3;E9PKG1;E9PIX6;E9PQ98;H0YDE4;E9PNR9	Q99873-4	Q99873-4	PRMT1	Protein arginine N-methyltransferase 1	>sp|Q99873-4|ANM1_HUMAN Isoform 4 of Protein arginine N-methyltransferase 1 OS=Homo sapiens GN=PRMT1;>tr|H7C2I1|H7C2I1_HUMAN Protein arginine N-methyltransferase 1 OS=Homo sapiens GN=PRMT1 PE=1 SV=1;>sp|Q99873|ANM1_HUMAN Protein arginine N-methyltransferas	MULTI-MSMS		JACB153_3	MCF7 R10K8	705.38	2	700.372	1398.73	41046.1	-0.28083	0.17513	-0.10571	700.372	705.377	67.246	26.412	0.68913	67.246	66.788	67.477	0		0	0	0	0.0014451	1	24904	91.858	81.806	1	9.8595	3.4645	0
LQEALNLFK	9	1	0	Unmodified	_LQEALNLFK_			0	0	Q5JWF2;Q5JWF2-2;P63092-4;P63092;P63092-2;P63092-3	Q5JWF2	Q5JWF2	GNAS	Guanine nucleotide-binding protein G(s) subunit alpha isoforms XLas;Guanine nucleotide-binding protein G(s) subunit alpha isoforms short	>sp|Q5JWF2|GNAS1_HUMAN Guanine nucleotide-binding protein G(s) subunit alpha isoforms XLas OS=Homo sapiens GN=GNAS PE=1 SV=2;>sp|Q5JWF2-2|GNAS1_HUMAN Isoform XLas-2 of Guanine nucleotide-binding protein G(s) subunit alpha isoforms XLas OS=Homo sapiens GN=G	MULTI-MSMS		JACB153_3	MCF7 R10K8	542.32	2	538.311	1074.61	48173.2	-0.06838	0.776	0.70762	538.311	542.318	49.057	20.356	0.47421	49.057	48.867	49.341	0		0	0	0	0.00023941	1	17901	145.17	110.64	1	10.099	3.4039	0
GLPLVDDGGWNTVPISK	17	1	0	Unmodified	_GLPLVDDGGWNTVPISK_			0	0	Q04637-9;Q04637-8;Q04637;E7EUU4;Q04637-3;E9PGM1;Q04637-4;E7EX73;Q04637-5;Q04637-7;Q04637-6;H7C044	Q04637-9	Q04637-9	EIF4G1	Eukaryotic translation initiation factor 4 gamma 1	>sp|Q04637-9|IF4G1_HUMAN Isoform 9 of Eukaryotic translation initiation factor 4 gamma 1 OS=Homo sapiens GN=EIF4G1;>sp|Q04637-8|IF4G1_HUMAN Isoform 8 of Eukaryotic translation initiation factor 4 gamma 1 OS=Homo sapiens GN=EIF4G1;>sp|Q04637|IF4G1_HUMAN Euk	MULTI-MSMS		JACB153_3	MCF7 R10K8	888.47	2	884.467	1766.92	37865.1	-0.58262	0.2454	-0.33722	884.467	888.475	62.446	24.818	0.41783	62.446	62.208	62.625	0		0	0	0	3.3623e-07	1	23125	121.27	114.78	1	10.106	3.3529	0
HYLFDVQR	8	0	1	Unmodified	_HYLFDVQR_			0	0	P24539;Q5QNZ2	P24539	P24539	ATP5F1	ATP synthase subunit b, mitochondrial	>sp|P24539|AT5F1_HUMAN ATP synthase F(0) complex subunit B1, mitochondrial OS=Homo sapiens GN=ATP5F1 PE=1 SV=2;>tr|Q5QNZ2|Q5QNZ2_HUMAN ATP synthase F(0) complex subunit B1, mitochondrial OS=Homo sapiens GN=ATP5F1 PE=1 SV=1	MULTI-MSMS		JACB153_3	MCF7 R10K8	544.28	2	539.277	1076.54	47183.6	-0.10008	-0.55089	-0.65097	539.775	544.281	32.683	14.895	0.55096	32.683	32.371	32.922	0		0	0	0	0.0023958	1	10912	105.57	105.57	1	10.215	3.8845	0
NFYQEHPDLAR	11	0	1	Unmodified	_NFYQEHPDLAR_			0	0	J3KTA4;P17844;B4DLW8;J3QRQ7;J3KRX8;J3QR02;X6RLV5	J3KTA4	J3KTA4	DDX5	Probable ATP-dependent RNA helicase DDX5	>tr|J3KTA4|J3KTA4_HUMAN Probable ATP-dependent RNA helicase DDX5 OS=Homo sapiens GN=DDX5 PE=1 SV=1;>sp|P17844|DDX5_HUMAN Probable ATP-dependent RNA helicase DDX5 OS=Homo sapiens GN=DDX5 PE=1 SV=1;>tr|B4DLW8|B4DLW8_HUMAN Probable ATP-dependent RNA helicase	MULTI-MSMS		JACB153_3	MCF7 R10K8	467.23	3	463.89	1388.65	51207	-0.1865	0.12028	-0.066216	464.225	467.226	26.84	12.95	0.51901	26.84	26.581	27.1	0		0	0	0	0.0097952	1	8269	72.652	72.652	1	10.239	3.3972	0
VFLENVIR	8	0	1	Unmodified	_VFLENVIR_			0	0	P62805	P62805	P62805	HIST1H4A	Histone H4	>sp|P62805|H4_HUMAN Histone H4 OS=Homo sapiens GN=HIST1H4A PE=1 SV=2	MULTI-MSMS		JACB153_3	MCF7 R10K8	495.29	2	495.293	988.571	50156.5	-0.082892	0.0050766	-0.077815	495.293	500.297	47.556	19.851	0.71742	47.556	47.329	48.047	0		0	0	0	0.0023596	2	17317	107.29	68.273	1	10.323	2.9822	0
GFGFVTFDDHDPVDK	15	1	0	Unmodified	_GFGFVTFDDHDPVDK_			0	0	P22626;P22626-2	P22626	P22626	HNRNPA2B1	Heterogeneous nuclear ribonucleoproteins A2/B1	>sp|P22626|ROA2_HUMAN Heterogeneous nuclear ribonucleoproteins A2/B1 OS=Homo sapiens GN=HNRNPA2B1 PE=1 SV=2;>sp|P22626-2|ROA2_HUMAN Isoform A2 of Heterogeneous nuclear ribonucleoproteins A2/B1 OS=Homo sapiens GN=HNRNPA2B1	MULTI-MSMS		JACB153_3	MCF7 R10K8	852.39	2	848.386	1694.76	37492.1	-0.89281	-0.24131	-1.1341	848.388	852.393	51.575	21.19	0.36884	51.575	51.408	51.777	0		0	0	0	8.3111e-08	1	18928	149.3	149.3	1	11.138	3.6298	0
DLQSNVEHLTEK	12	1	0	Unmodified	_DLQSNVEHLTEK_			0	0	Q01813;Q01813-2;B1APP8	Q01813	Q01813	PFKP	6-phosphofructokinase type C	>sp|Q01813|K6PP_HUMAN 6-phosphofructokinase type C OS=Homo sapiens GN=PFKP PE=1 SV=2;>sp|Q01813-2|K6PP_HUMAN Isoform 2 of 6-phosphofructokinase type C OS=Homo sapiens GN=PFKP;>tr|B1APP8|B1APP8_HUMAN 6-phosphofructokinase type C OS=Homo sapiens GN=PFKP PE=1	MULTI-MSMS		JACB153_3	MCF7 R10K8	474.24	3	471.572	1411.69	50980.4	-0.35847	1.1055	0.74708	471.573	474.244	35.029	15.68	0.39872	35.029	34.836	35.234	0		0	0	0	0.00019542	1	11887	115.14	92.416	1	11.762	3.749	0
SSTPLHSPSPIR	12	0	1	Unmodified	_SSTPLHSPSPIR_			0	0	O95817;C9JFK9	O95817	O95817	BAG3	BAG family molecular chaperone regulator 3	>sp|O95817|BAG3_HUMAN BAG family molecular chaperone regulator 3 OS=Homo sapiens GN=BAG3 PE=1 SV=3;>tr|C9JFK9|C9JFK9_HUMAN BAG family molecular chaperone regulator 3 (Fragment) OS=Homo sapiens GN=BAG3 PE=1 SV=1	MULTI-MSMS		JACB153_3	MCF7 R10K8	430.23	3	426.898	1277.67	53283.8	-0.33784	1.2989	0.96103	426.899	430.235	21.111	11.039	0.43611	21.111	20.874	21.31	0		0	0	0	0.0003348	1	5801	96.64	96.64	1	12.225	4.7159	0
LLGASELPIVTPALR	15	0	1	Unmodified	_LLGASELPIVTPALR_			0	0	P52292	P52292	P52292	KPNA2	Importin subunit alpha-2	>sp|P52292|IMA1_HUMAN Importin subunit alpha-1 OS=Homo sapiens GN=KPNA2 PE=1 SV=1	MULTI-MSMS		JACB153_3	MCF7 R10K8	780.47	2	775.469	1548.92	40079.6	-0.51956	-0.23125	-0.75081	775.47	780.473	63.802	25.267	0.65071	63.802	63.593	64.244	0		0	0	0	2.7737e-07	1	23651	130.24	130.24	1	12.617	4.8659	0
ELFSPLHALNFGIGGDTTR	19	0	1	Unmodified	_ELFSPLHALNFGIGGDTTR_			0	0	P68402;P68402-4;P68402-2;P68402-3	P68402	P68402	PAFAH1B2	Platelet-activating factor acetylhydrolase IB subunit beta	>sp|P68402|PA1B2_HUMAN Platelet-activating factor acetylhydrolase IB subunit beta OS=Homo sapiens GN=PAFAH1B2 PE=1 SV=1;>sp|P68402-4|PA1B2_HUMAN Isoform 4 of Platelet-activating factor acetylhydrolase IB subunit beta OS=Homo sapiens GN=PAFAH1B2;>sp|P68402-	MULTI-MSMS		JACB153_3	MCF7 R10K8	685.69	3	682.353	2044.04	42267.5	-0.35558	-0.13784	-0.49343	682.687	685.689	65.371	25.795	0.55965	65.371	65.054	65.614	7.6294e-06		0	0	0	2.1521e-13	1	24207	174.65	174.65	1	12.671	4.7268	0
VNFHMFDVGGQR	12	0	1	Unmodified	_VNFHMFDVGGQR_			0	0	Q5JWF2;Q5JWF2-2;P63092-4;P63092;P63092-2;P63092-3;P38405-2;P38405;K7EPE2;K7EQ80	Q5JWF2	Q5JWF2	GNAS;GNAL	Guanine nucleotide-binding protein G(s) subunit alpha isoforms XLas;Guanine nucleotide-binding protein G(s) subunit alpha isoforms short;Guanine nucleotide-binding protein G(olf) subunit alpha	>sp|Q5JWF2|GNAS1_HUMAN Guanine nucleotide-binding protein G(s) subunit alpha isoforms XLas OS=Homo sapiens GN=GNAS PE=1 SV=2;>sp|Q5JWF2-2|GNAS1_HUMAN Isoform XLas-2 of Guanine nucleotide-binding protein G(s) subunit alpha isoforms XLas OS=Homo sapiens GN=G	MULTI-MSMS		JACB153_3	MCF7 R10K8	472.89	3	469.559	1405.66	50644.6	-0.22496	-0.91336	-1.1383	469.893	472.895	42.84	18.282	0.29348	42.84	42.692	42.985	3.8147e-06		0	0	0	0.0071093	1	15347	81.431	81.431	1	12.706	6.7974	0
GCCFDDTVR	9	0	1	Unmodified	_GCCFDDTVR_			0	0	P04155	P04155	P04155	TFF1	Trefoil factor 1	>sp|P04155|TFF1_HUMAN Trefoil factor 1 OS=Homo sapiens GN=TFF1 PE=1 SV=1	MULTI-MSMS		JACB153_3	MCF7 R10K8	570.23	2	565.224	1128.43	46264.5	-0.065744	-0.52484	-0.59058	565.224	570.228	24.786	12.262	0.35165	24.786	24.605	24.957	-1.9073e-06		0	0	0	0.00092542	1	7355	105.52	105.52	1	13.173	4.9563	0
HVAAGTQQPYTDGVR	15	0	1	Unmodified	_HVAAGTQQPYTDGVR_			0	0	P14923	P14923	P14923	JUP	Junction plakoglobin	>sp|P14923|PLAK_HUMAN Junction plakoglobin OS=Homo sapiens GN=JUP PE=1 SV=3	MULTI-MSMS		JACB153_3	MCF7 R10K8	537.27	3	533.934	1598.78	48570.4	0.096059	0.6708	0.76685	534.268	537.271	18.243	10.082	0.42171	18.243	18.106	18.528	0		0	0	0	2.0857e-07	1	4694	136.99	130.41	1	13.903	6.4862	0
LLGYVATLK	9	1	0	Unmodified	_LLGYVATLK_			0	0	O75534-4;O75534-3;O75534;O75534-2;E9PLT0	O75534-4	O75534-4	CSDE1	Cold shock domain-containing protein E1	>sp|O75534-4|CSDE1_HUMAN Isoform 4 of Cold shock domain-containing protein E1 OS=Homo sapiens GN=CSDE1;>sp|O75534-3|CSDE1_HUMAN Isoform 3 of Cold shock domain-containing protein E1 OS=Homo sapiens GN=CSDE1;>sp|O75534|CSDE1_HUMAN Cold shock domain-containin	MULTI-MSMS		JACB153_3	MCF7 R10K8	493.31	2	489.305	976.596	51302.9	0.63558	-0.93136	-0.29577	489.304	493.312	43.222	18.411	0.2608	43.222	43.065	43.326	0		0	0	0	0.004903	1	15505	80.688	46.302	1	14.162	4.8917	0
LFVGGLSFDTNEQSLEQVFSK	21	1	0	Unmodified	_LFVGGLSFDTNEQSLEQVFSK_			0	0	Q14011;D6W5Y5;B4E2X2;K7EQR7;K7ER40;K7EPM4;K7EMY9;K7ELT6;K7EJV5;K7ENX8;K7ELV6;K7EQL0;K7EIF7;K7ENN6;K7EQX4	Q14011	Q14011	CIRBP	Cold-inducible RNA-binding protein	>sp|Q14011|CIRBP_HUMAN Cold-inducible RNA-binding protein OS=Homo sapiens GN=CIRBP PE=1 SV=1;>tr|D6W5Y5|D6W5Y5_HUMAN Cold inducible RNA binding protein, isoform CRA_c OS=Homo sapiens GN=CIRBP PE=1 SV=1;>tr|B4E2X2|B4E2X2_HUMAN Cold-inducible RNA-binding pro	MULTI-MSMS		JACB153_3	MCF7 R10K8	785.4	3	782.394	2344.16	39905.7	-0.3764	0.4499	0.073497	782.396	785.399	76.867	29.619	0.60268	76.867	76.673	77.276	0		0	0	0	6.5369e-07	1	28315	94.384	94.384	1	15.426	5.9132	0
VSEPLLWELFLQAGPVVNTHMPK	23	1	0	Unmodified	_VSEPLLWELFLQAGPVVNTHMPK_			0	0	Q15427	Q15427	Q15427	SF3B4	Splicing factor 3B subunit 4	>sp|Q15427|SF3B4_HUMAN Splicing factor 3B subunit 4 OS=Homo sapiens GN=SF3B4 PE=1 SV=1	MULTI-MSMS		JACB153_3	MCF7 R10K8	872.14	3	869.133	2604.38	37485.9	-0.33893	-1.7148	-2.0538	870.133	872.137	84.473	32.16	0.86946	84.473	83.989	84.858	0		0	0	0	0.0020535	1	31027	73.981	73.981	1	17.008	8.2194	0
ILDVLEEIPK	10	1	0	Unmodified	_ILDVLEEIPK_			0	0	Q16718;Q5H9R2;H7BYD0;C9IZN5;F8WAS3	Q16718	Q16718	NDUFA5;DKFZp781K1356	NADH dehydrogenase [ubiquinone] 1 alpha subcomplex subunit 5	>sp|Q16718|NDUA5_HUMAN NADH dehydrogenase [ubiquinone] 1 alpha subcomplex subunit 5 OS=Homo sapiens GN=NDUFA5 PE=1 SV=3;>tr|Q5H9R2|Q5H9R2_HUMAN NADH dehydrogenase [ubiquinone] 1 alpha subcomplex subunit 5 OS=Homo sapiens GN=DKFZp781K1356 PE=1 SV=1;>tr|H7BY	MULTI-MSMS		JACB153_3	MCF7 R10K8	588.85	2	584.845	1167.68	45814.2	-0.14334	-0.96394	-1.1073	584.844	588.851	61.022	24.345	0.62866	61.022	60.663	61.292	-3.8147e-06		0	0	0	0.0027828	1	22672	88.596	88.596	1	17.988	6.6061	0
DWVLNEFK	8	1	0	Unmodified	_DWVLNEFK_			0	0	J3KTA4;P17844;B4DLW8	J3KTA4	J3KTA4	DDX5	Probable ATP-dependent RNA helicase DDX5	>tr|J3KTA4|J3KTA4_HUMAN Probable ATP-dependent RNA helicase DDX5 OS=Homo sapiens GN=DDX5 PE=1 SV=1;>sp|P17844|DDX5_HUMAN Probable ATP-dependent RNA helicase DDX5 OS=Homo sapiens GN=DDX5 PE=1 SV=1;>tr|B4DLW8|B4DLW8_HUMAN Probable ATP-dependent RNA helicase	MULTI-MSMS		JACB153_3	MCF7 R10K8	529.77	2	525.766	1049.52	52324.7	0.36973	-0.16878	0.20095	525.766	529.773	58.315	23.442	0.36773	58.315	58.102	58.469	-3.8147e-06		0	0	0	0.0030878	1	21600	92.439	80.155	1	18.047	6.2972	0
VGFQYEGTYK	10	1	0	Unmodified	_VGFQYEGTYK_			0	0	P11413-2;P11413-3;P11413	P11413-2	P11413-2	G6PD	Glucose-6-phosphate 1-dehydrogenase	>sp|P11413-2|G6PD_HUMAN Isoform Long of Glucose-6-phosphate 1-dehydrogenase OS=Homo sapiens GN=G6PD;>sp|P11413-3|G6PD_HUMAN Isoform 3 of Glucose-6-phosphate 1-dehydrogenase OS=Homo sapiens GN=G6PD;>sp|P11413|G6PD_HUMAN Glucose-6-phosphate 1-dehydrogenase O	MULTI-MSMS		JACB153_3	MCF7 R10K8	600.29	2	596.288	1190.56	45359.2	-0.53068	0.53056	-0.00012405	596.289	600.295	33.241	15.078	0.6075	33.241	33.031	33.638	0		0	0	0	0.0010205	1	11193	110.38	110.38	1	18.063	4.2208	0
TLVTQNSGVEALIHAILR	18	0	1	Unmodified	_TLVTQNSGVEALIHAILR_			0	0	P14923	P14923	P14923	JUP	Junction plakoglobin	>sp|P14923|PLAK_HUMAN Junction plakoglobin OS=Homo sapiens GN=JUP PE=1 SV=3	MULTI-MSMS		JACB153_3	MCF7 R10K8	649.38	3	645.706	1934.09	43921.8	0.066414	-0.063639	0.0027753	646.04	649.042	74.786	28.929	0.76213	74.786	74.368	75.131	0		0	0	0	1.7207e-11	2	27654	153.74	153.74	1	18.234	9.2957	0
YLAEVATGEK	10	1	0	Unmodified	_YLAEVATGEK_			0	0	P61981	P61981	P61981	YWHAG	14-3-3 protein gamma;14-3-3 protein gamma, N-terminally processed	>sp|P61981|1433G_HUMAN 14-3-3 protein gamma OS=Homo sapiens GN=YWHAG PE=1 SV=2	MULTI-MSMS		JACB153_3	MCF7 R10K8	544.79	2	540.782	1079.55	46853.4	-0.35205	-0.20869	-0.56074	540.782	544.789	25.764	12.585	0.45697	25.764	25.555	26.012	-1.9073e-06		0	0	0	0.00093264	1	7805	117.02	96.188	1	18.773	4.9636	0
ELLTTMGDR	9	0	1	Unmodified	_ELLTTMGDR_			0	0	P24844;P24844-2;J3QRS3;O14950;P19105	P24844;J3QRS3	J3QRS3	MYL9;MYL12B;MYL12A	Myosin regulatory light polypeptide 9;Myosin regulatory light chain 12B;Myosin regulatory light chain 12A	>sp|P24844|MYL9_HUMAN Myosin regulatory light polypeptide 9 OS=Homo sapiens GN=MYL9 PE=1 SV=4;>sp|P24844-2|MYL9_HUMAN Isoform 2 of Myosin regulatory light polypeptide 9 OS=Homo sapiens GN=MYL9;>tr|J3QRS3|J3QRS3_HUMAN Myosin regulatory light chain 12A OS=Ho	MULTI-MSMS		JACB153_3	MCF7 R10K8	523.77	2	518.261	1034.51	48879.8	0.0070459	-0.13396	-0.12692	518.261	523.264	33.05	15.019	0.46939	33.05	32.807	33.277	0		0	0	0	0.050565	1	11020	54.416	28.857	1	19.183	6.7373	0
FLLSLPEHR	9	0	1	Unmodified	_FLLSLPEHR_			0	0	Q15008;C9IZE4;C9J7B7	Q15008	Q15008	PSMD6	26S proteasome non-ATPase regulatory subunit 6	>sp|Q15008|PSMD6_HUMAN 26S proteasome non-ATPase regulatory subunit 6 OS=Homo sapiens GN=PSMD6 PE=1 SV=1;>tr|C9IZE4|C9IZE4_HUMAN 26S proteasome non-ATPase regulatory subunit 6 OS=Homo sapiens GN=PSMD6 PE=1 SV=1;>tr|C9J7B7|C9J7B7_HUMAN 26S proteasome non-AT	MULTI-MSMS		JACB153_3	MCF7 R10K8	374.55	3	371.213	1110.62	57148.2	-1.0654	0.036705	-1.0287	371.213	374.55	42.478	18.157	0.49781	42.478	42.214	42.712	0		0	0	0	0.0024349	1	15136	89.247	63.673	1	19.266	7.4395	0
DNAMLEYLK	9	1	0	Unmodified	_DNAMLEYLK_			0	0	P15311;E7EQR4	P15311	P15311	EZR	Ezrin	>sp|P15311|EZRI_HUMAN Ezrin OS=Homo sapiens GN=EZR PE=1 SV=4;>tr|E7EQR4|E7EQR4_HUMAN Ezrin OS=Homo sapiens GN=EZR PE=1 SV=2	MULTI-MSMS		JACB153_3	MCF7 R10K8	552.78	2	548.771	1095.53	46839.6	-0.086149	0.18065	0.094503	549.272	552.778	52.024	21.337	0.70998	52.024	51.584	52.294	0		0	0	0	0.0067849	1	19122	74.162	43.592	1	19.898	6.4547	0
ASGNYATVISHNPETK	16	1	0	Unmodified	_ASGNYATVISHNPETK_			0	0	P62917;E9PKZ0;G3V1A1	P62917	P62917	RPL8	60S ribosomal protein L8	>sp|P62917|RL8_HUMAN 60S ribosomal protein L8 OS=Homo sapiens GN=RPL8 PE=1 SV=2;>tr|E9PKZ0|E9PKZ0_HUMAN 60S ribosomal protein L8 (Fragment) OS=Homo sapiens GN=RPL8 PE=1 SV=1;>tr|G3V1A1|G3V1A1_HUMAN 60S ribosomal protein L8 OS=Homo sapiens GN=RPL8 PE=1 SV=1	MULTI-MSMS		JACB153_3	MCF7 R10K8	566.28	3	563.613	1687.82	46917.7	-0.20384	-0.095178	-0.29902	563.95	566.284	23.671	11.892	0.3748	23.671	23.502	23.877	1.9073e-06		0	0	0	4.3478e-09	1	6875	159.34	159.34	1	20.135	5.3554	0
FSPNSSNPIIVSCGWDK	17	1	0	Unmodified	_FSPNSSNPIIVSCGWDK_			0	0	P63244;J3KPE3;D6RAC2;H0Y8W2;H0YAF8;D6REE5;H0YAM7;D6RHH4;D6R9L0;D6R9Z1;D6RFX4;D6RBD0;H0Y8R5	P63244	P63244	GNB2L1	Guanine nucleotide-binding protein subunit beta-2-like 1	>sp|P63244|GBLP_HUMAN Guanine nucleotide-binding protein subunit beta-2-like 1 OS=Homo sapiens GN=GNB2L1 PE=1 SV=3;>tr|J3KPE3|J3KPE3_HUMAN Guanine nucleotide-binding protein subunit beta-2-like 1 OS=Homo sapiens GN=GNB2L1 PE=1 SV=1;>tr|D6RAC2|D6RAC2_HUMAN	MULTI-MSMS		JACB153_3	MCF7 R10K8	958.96	2	954.451	1906.89	36185.1	-0.7086	-0.39377	-1.1024	954.451	958.458	51.049	21.015	0.45055	51.049	50.824	51.274	0		0	0	0	5.1363e-09	1	18694	149.95	149.95	1	20.172	5.8382	0
EAFQLFDR	8	0	1	Unmodified	_EAFQLFDR_			0	0	B7Z6Z4;G3V1V0;G8JLA2;J3KND3;P60660;P60660-2;F8W1R7;G3V1Y7	B7Z6Z4	B7Z6Z4	MYL6	Myosin light polypeptide 6	>tr|B7Z6Z4|B7Z6Z4_HUMAN Myosin light polypeptide 6 OS=Homo sapiens GN=MYL6 PE=1 SV=1;>tr|G3V1V0|G3V1V0_HUMAN Myosin light polypeptide 6 OS=Homo sapiens GN=MYL6 PE=1 SV=1;>tr|G8JLA2|G8JLA2_HUMAN Myosin light polypeptide 6 OS=Homo sapiens GN=MYL6 PE=1 SV=1;>	MULTI-MSMS		JACB153_3	MCF7 R10K8	518.26	2	513.256	1024.5	48647	0.17104	0.32379	0.49483	513.257	518.26	49.006	20.336	0.58008	49.006	48.761	49.341	0		0	0	0	0.008218	1	17839	76.1	55.77	1	20.207	6.1114	0
LESGMQNMSIHTK	13	1	0	Oxidation (M)	_LESGM(ox)QNMSIHTK_	LESGM(1)QNMSIHTK	LESGM(69.37)QNM(-69.37)SIHTK	0	1	P05787-2;CON__P05787;P05787;CON__REFSEQ:XP_092267	P05787-2	P05787-2	KRT8	Keratin, type II cytoskeletal 8	>sp|P05787-2|K2C8_HUMAN Isoform 2 of Keratin, type II cytoskeletal 8 OS=Homo sapiens GN=KRT8;>P05787 SWISS-PROT:P05787 Tax_Id=9606 Gene_Symbol=KRT8 Keratin, type II cytoskeletal 8;>sp|P05787|K2C8_HUMAN Keratin, type II cytoskeletal 8 OS=Homo sapiens GN=KRT	MULTI-MSMS		JACB153_3	MCF7 R10K8	500.57	3	497.903	1490.69	48812.5	0.091287	-0.28436	-0.19307	497.903	500.574	17.546	9.8497	0.32171	17.546	17.391	17.713	0		0	0	0	1.0257e-05	1	4438	156.14	151.43	2	20.735	6.4817	0
ELLVPLTSSMYVPGK	15	1	0	Unmodified	_ELLVPLTSSMYVPGK_			0	0	Q99471	Q99471	Q99471	PFDN5	Prefoldin subunit 5	>sp|Q99471|PFD5_HUMAN Prefoldin subunit 5 OS=Homo sapiens GN=PFDN5 PE=1 SV=2	MULTI-MSMS		JACB153_3	MCF7 R10K8	821.45	2	817.447	1632.88	39025.6	-0.3043	0.23332	-0.070976	817.95	821.454	63.109	25.034	0.5444	63.109	62.825	63.37	0		0	0	0	0.0017238	1	23401	81.327	81.327	1	20.792	7.1667	0
SIPICTLK	8	1	0	Unmodified	_SIPICTLK_			0	0	P22314	P22314	P22314	UBA1	Ubiquitin-like modifier-activating enzyme 1	>sp|P22314|UBA1_HUMAN Ubiquitin-like modifier-activating enzyme 1 OS=Homo sapiens GN=UBA1 PE=1 SV=3	MULTI-MSMS		JACB153_3	MCF7 R10K8	470.27	2	466.268	930.521	51342.3	-0.43877	0.51115	0.07238	466.269	470.275	33.325	15.111	0.40156	33.325	33.171	33.572	0		0	0	0	0.011885	1	11174	64.42	28.025	1	22.451	6.2078	0
IINEPTAAAIAYGLDK	16	1	0	Unmodified	_IINEPTAAAIAYGLDK_			0	0	P11142;E9PKE3;P11142-2;E9PN89;E9PLF4;E9PI65;P54652;P11021	P11142;P54652;P11021	P11142	HSPA8;HSPA2;HSPA5	Heat shock cognate 71 kDa protein;Heat shock-related 70 kDa protein 2;78 kDa glucose-regulated protein	>sp|P11142|HSP7C_HUMAN Heat shock cognate 71 kDa protein OS=Homo sapiens GN=HSPA8 PE=1 SV=1;>tr|E9PKE3|E9PKE3_HUMAN Heat shock cognate 71 kDa protein OS=Homo sapiens GN=HSPA8 PE=1 SV=1;>sp|P11142-2|HSP7C_HUMAN Isoform 2 of Heat shock cognate 71 kDa protein	MULTI-MSMS		JACB153_3	MCF7 R10K8	556.64	3	553.97	1658.89	47498.4	0.12964	-0.3409	-0.21125	554.304	556.641	53.584	21.862	0.56567	53.584	53.324	53.89	0		0	0	0	1.1829e-07	1	19704	135.09	135.09	1	22.474	5.7489	0
HVLVTLGEK	9	1	0	Unmodified	_HVLVTLGEK_			0	0	B7Z6Z4;G3V1V0;G8JLA2;J3KND3;P60660;P60660-2;F8W1R7;F8VPF3;G3V1Y7;F8W180;F8VZU9;H0YI43;F8VXL3	B7Z6Z4	B7Z6Z4	MYL6	Myosin light polypeptide 6	>tr|B7Z6Z4|B7Z6Z4_HUMAN Myosin light polypeptide 6 OS=Homo sapiens GN=MYL6 PE=1 SV=1;>tr|G3V1V0|G3V1V0_HUMAN Myosin light polypeptide 6 OS=Homo sapiens GN=MYL6 PE=1 SV=1;>tr|G8JLA2|G8JLA2_HUMAN Myosin light polypeptide 6 OS=Homo sapiens GN=MYL6 PE=1 SV=1;>	MULTI-MSMS		JACB153_3	MCF7 R10K8	502.3	2	498.298	994.581	49340.6	-0.161	0.15333	-0.007668	498.299	502.305	23.574	11.859	0.47537	23.574	23.389	23.865	1.9073e-06		0	0	0	0.0010128	1	6813	99.815	99.815	1	22.949	6.5209	0
IYIDSNNNPER	11	0	1	Unmodified	_IYIDSNNNPER_			0	0	Q00610;Q00610-2	Q00610	Q00610	CLTC	Clathrin heavy chain 1	>sp|Q00610|CLH1_HUMAN Clathrin heavy chain 1 OS=Homo sapiens GN=CLTC PE=1 SV=5;>sp|Q00610-2|CLH1_HUMAN Isoform 2 of Clathrin heavy chain 1 OS=Homo sapiens GN=CLTC	MULTI-MSMS		JACB153_3	MCF7 R10K8	672.82	2	667.82	1333.63	42036.3	-0.52148	-0.24533	-0.76681	667.819	672.824	24.819	12.271	0.35139	24.819	24.65	25.001	0		0	0	0	8.3142e-07	1	7374	185.77	145.27	1	23.048	7.4204	0
VFQFLNAK	8	1	0	Unmodified	_VFQFLNAK_			0	0	P83731;C9JNW5;C9JXB8	P83731	P83731	RPL24	60S ribosomal protein L24	>sp|P83731|RL24_HUMAN 60S ribosomal protein L24 OS=Homo sapiens GN=RPL24 PE=1 SV=1;>tr|C9JNW5|C9JNW5_HUMAN 60S ribosomal protein L24 OS=Homo sapiens GN=RPL24 PE=1 SV=1;>tr|C9JXB8|C9JXB8_HUMAN 60S ribosomal protein L24 OS=Homo sapiens GN=RPL24 PE=1 SV=1	MULTI-MSMS		JACB153_3	MCF7 R10K8	487.78	2	483.774	965.533	50490.4	-0.015578	-0.71904	-0.73462	483.773	487.781	44.373	18.793	0.71081	44.373	44.003	44.714	0		0	0	0	0.002343	1	15965	108.09	72.65	1	24.111	6.8636	0
MLDMGFEPQIR	11	0	1	Unmodified	_MLDMGFEPQIR_			0	0	O00571;O00571-2;O15523;B4DXX7;H3BLZ8;Q92841;C9JMU5;Q92841-2;Q92841-3;Q92841-1;J3KTA4;P17844;B4DLW8;J3KRZ1;J3QSF1	O00571;H3BLZ8;J3KTA4	O00571	DDX3X;DDX3Y;DDX17;DDX5	ATP-dependent RNA helicase DDX3X;ATP-dependent RNA helicase DDX3Y;Probable ATP-dependent RNA helicase DDX17;Probable ATP-dependent RNA helicase DDX5	>sp|O00571|DDX3X_HUMAN ATP-dependent RNA helicase DDX3X OS=Homo sapiens GN=DDX3X PE=1 SV=3;>sp|O00571-2|DDX3X_HUMAN Isoform 2 of ATP-dependent RNA helicase DDX3X OS=Homo sapiens GN=DDX3X;>sp|O15523|DDX3Y_HUMAN ATP-dependent RNA helicase DDX3Y OS=Homo sapie	MULTI-MSMS		JACB153_3	MCF7 R10K8	673.83	2	668.823	1335.63	41967.1	-0.69718	-0.23703	-0.93421	668.825	673.828	54.281	22.092	0.61439	54.281	53.976	54.591	0		0	0	0	0.00069791	1	20023	101.93	90.361	1	24.25	7.9476	0
EPISVSSEQVLK	12	1	0	Unmodified	_EPISVSSEQVLK_			0	0	P00918	P00918	P00918	CA2	Carbonic anhydrase 2	>sp|P00918|CAH2_HUMAN Carbonic anhydrase 2 OS=Homo sapiens GN=CA2 PE=1 SV=2	MULTI-MSMS		JACB153_3	MCF7 R10K8	662.37	2	658.359	1314.7	43654.6	-0.45451	-0.12083	-0.57534	658.358	662.366	36.428	16.144	0.33551	36.428	36.307	36.642	0		0	0	0	0.010202	1	12539	75.739	75.739	1	24.345	7.5951	0
DEEVHAGLGELLR	13	0	1	Unmodified	_DEEVHAGLGELLR_			0	0	P50454;E9PPV6;E9PR70;E9PMI5;E9PK86;E9PNX1;E9PRS3;E9PIG2;E9PJH8;E9PQ34	P50454	P50454	SERPINH1	Serpin H1	>sp|P50454|SERPH_HUMAN Serpin H1 OS=Homo sapiens GN=SERPINH1 PE=1 SV=2;>tr|E9PPV6|E9PPV6_HUMAN Serpin H1 OS=Homo sapiens GN=SERPINH1 PE=1 SV=1;>tr|E9PR70|E9PR70_HUMAN Serpin H1 (Fragment) OS=Homo sapiens GN=SERPINH1 PE=1 SV=1;>tr|E9PMI5|E9PMI5_HUMAN Serpin	MULTI-MSMS		JACB153_3	MCF7 R10K8	483.25	3	479.916	1436.73	50547.9	-0.65904	0.85028	0.19124	480.253	483.252	45.501	19.165	0.63868	45.501	45.165	45.804	0		0	0	0	0.005545	1	16454	79.466	73.751	1	25.746	9.0879	0
LVQLLVK	7	1	0	Unmodified	_LVQLLVK_			0	0	P14923	P14923	P14923	JUP	Junction plakoglobin	>sp|P14923|PLAK_HUMAN Junction plakoglobin OS=Homo sapiens GN=JUP PE=1 SV=3	MULTI-MSMS		JACB153_3	MCF7 R10K8	410.79	2	406.784	811.553	54735.5	-0.67285	0.37139	-0.30146	406.783	410.791	38.956	16.989	0.37122	38.956	38.77	39.141	0		0	0	0	0.0072874	1	13638	97.071	49.164	1	26.027	10.897	0
SEVTDLR	7	0	1	Unmodified	_SEVTDLR_			0	0	CON__P08727;P08727;K7EMS3;CON__Q99456;Q99456	CON__P08727	CON__P08727	KRT19;KRT12	Keratin, type I cytoskeletal 19;Keratin, type I cytoskeletal 12	>P08727 SWISS-PROT:P08727 Tax_Id=9606 Gene_Symbol=KRT19 Keratin, type I cytoskeletal 19;>sp|P08727|K1C19_HUMAN Keratin, type I cytoskeletal 19 OS=Homo sapiens GN=KRT19 PE=1 SV=4;>tr|K7EMS3|K7EMS3_HUMAN Keratin, type I cytoskeletal 19 (Fragment) OS=Homo sap	MULTI-MSMS		JACB153_3	MCF7 R10K8	415.22	2	410.214	818.413	53067.4	0.18103	-0.68153	-0.5005	410.214	415.218	20.166	10.726	0.50246	20.166	19.952	20.454	0		0	0	0	0.0092735	1	5448	89.142	17.004	1	26.123	8.5579	0
YMNSGPVVAMVWEGLNVVK	19	1	0	Unmodified	_YMNSGPVVAMVWEGLNVVK_			0	0	Q32Q12;P22392-2;P22392;O60361	Q32Q12	Q32Q12	NME1-NME2;NME2;NME2P1	Nucleoside diphosphate kinase;Nucleoside diphosphate kinase B;Putative nucleoside diphosphate kinase	>tr|Q32Q12|Q32Q12_HUMAN Nucleoside diphosphate kinase OS=Homo sapiens GN=NME1-NME2 PE=1 SV=1;>sp|P22392-2|NDKB_HUMAN Isoform 3 of Nucleoside diphosphate kinase B OS=Homo sapiens GN=NME2;>sp|P22392|NDKB_HUMAN Nucleoside diphosphate kinase B OS=Homo sapiens	MULTI-MSMS		JACB153_3	MCF7 R10K8	1051.54	2	1047.03	2092.05	34271.7	-0.38588	0.065544	-0.32033	1047.53	1051.54	82.925	31.64	0.86821	82.925	82.45	83.318	0		0	0	0	5.795e-11	2	30516	140.06	140.06	1	26.205	9.9987	0
PGPTPSGTNVGSSGR	15	0	1	Unmodified	_PGPTPSGTNVGSSGR_			0	0	P60468	P60468	P60468	SEC61B	Protein transport protein Sec61 subunit beta	>sp|P60468|SC61B_HUMAN Protein transport protein Sec61 subunit beta OS=Homo sapiens GN=SEC61B PE=1 SV=2	MULTI-MSMS		JACB153_3	MCF7 R10K8	690.84	2	685.837	1369.66	42410.9	-0.38784	-0.044957	-0.43279	685.835	690.841	17.346	9.7839	0.2658	17.346	17.207	17.473	0		0	0	0	2.2166e-05	1	4329	99.566	79.139	1	26.376	14.71	0
TLSDYNIQK	9	1	0	Unmodified	_TLSDYNIQK_			0	0	P62979;P0CG48;F5H041;Q96C32;P0CG47;J3QKN0;F5GXK7;F5H747;F5H388;B4DV12;F5H265;F5H2Z3;F5GYU3;P62987;F5H6Q2;J3QTR3;J3QS39;M0R2S1;M0R1M6;M0R1V7	P62979	P62979	RPS27A;UBC;UBB;UBA52	Ubiquitin-40S ribosomal protein S27a;Ubiquitin;40S ribosomal protein S27a;Polyubiquitin-C;Ubiquitin;Polyubiquitin-B;Ubiquitin;Ubiquitin-60S ribosomal protein L40;Ubiquitin;60S ribosomal protein L40	>sp|P62979|RS27A_HUMAN Ubiquitin-40S ribosomal protein S27a OS=Homo sapiens GN=RPS27A PE=1 SV=2;>sp|P0CG48|UBC_HUMAN Polyubiquitin-C OS=Homo sapiens GN=UBC PE=1 SV=3;>tr|F5H041|F5H041_HUMAN Polyubiquitin-C OS=Homo sapiens GN=UBC PE=2 SV=1;>tr|Q96C32|Q96C32	MULTI-MSMS		JACB153_3	MCF7 R10K8	545.29	2	541.28	1080.55	47514.4	0.087571	-0.29556	-0.20799	541.28	545.287	26.223	12.743	0.88758	26.223	25.949	26.837	0		0	0	0	0.0024349	3	8125	89.247	62.733	1	26.436	6.6378	0
SLEGDLEDLKDQIAQLEASLAAAK	24	2	0	Unmodified	_SLEGDLEDLKDQIAQLEASLAAAK_			0	0	P20700;E9PBF6	P20700	P20700	LMNB1	Lamin-B1	>sp|P20700|LMNB1_HUMAN Lamin-B1 OS=Homo sapiens GN=LMNB1 PE=1 SV=2;>tr|E9PBF6|E9PBF6_HUMAN Lamin-B1 OS=Homo sapiens GN=LMNB1 PE=1 SV=1	MULTI-MSMS		JACB153_3	MCF7 R10K8	849.12	3	843.441	2527.3	37459.1	-0.47478	0.079464	-0.39532	843.442	849.118	94.28	43.232	0.91865	94.28	93.888	94.807	-7.6294e-06		0	0	0	9.6293e-12	1	34348	149.84	144.05	1	26.78	46.131	0
DGFIDKEDLHDMLASLGK	18	2	0	Unmodified	_DGFIDKEDLHDMLASLGK_			0	0	P24844;J3KTJ1;J3QRS3;O14950;P19105	P24844;J3QRS3	J3QRS3	MYL9;MYL12B;MYL12A	Myosin regulatory light polypeptide 9;Myosin regulatory light chain 12B;Myosin regulatory light chain 12A	>sp|P24844|MYL9_HUMAN Myosin regulatory light polypeptide 9 OS=Homo sapiens GN=MYL9 PE=1 SV=4;>tr|J3KTJ1|J3KTJ1_HUMAN Myosin regulatory light chain 12A (Fragment) OS=Homo sapiens GN=MYL12A PE=2 SV=1;>tr|J3QRS3|J3QRS3_HUMAN Myosin regulatory light chain 12A	MULTI-MSMS		JACB153_3	MCF7 R10K8	505.76	4	501.749	2002.97	49344.8	0.3667	-0.49632	-0.12962	501.749	505.756	62.693	24.9	0.68278	62.693	62.389	63.072	0		0	0	0	8.3925e-16	1	23208	205.62	205.62	1	27.498	47.369	0
EQGVLSFWR	9	0	1	Unmodified	_EQGVLSFWR_			0	0	P05141;P12236;I7HJJ0	P05141;P12236	P12236	SLC25A5;SLC25A6	ADP/ATP translocase 2;ADP/ATP translocase 3	>sp|P05141|ADT2_HUMAN ADP/ATP translocase 2 OS=Homo sapiens GN=SLC25A5 PE=1 SV=7;>sp|P12236|ADT3_HUMAN ADP/ATP translocase 3 OS=Homo sapiens GN=SLC25A6 PE=1 SV=4;>tr|I7HJJ0|I7HJJ0_HUMAN ADP/ATP translocase 3 (Fragment) OS=Homo sapiens GN=SLC25A6 PE=1 SV=1	MULTI-MSMS		JACB153_3	MCF7 R10K8	566.3	2	561.291	1120.57	46461.2	-0.15956	0.34646	0.1869	561.289	566.295	56.609	22.868	0.81396	56.609	56.253	57.067	0		0	0	0	0.00089963	1	20886	107.21	89.341	1	28.674	7.5172	0
VWQVTIGTR	9	0	1	Unmodified	_VWQVTIGTR_			0	0	P63244;J3KPE3;D6RAC2;H0YAF8;D6RHH4;H0Y8R5;D6RF23;D6RHJ5	P63244	P63244	GNB2L1	Guanine nucleotide-binding protein subunit beta-2-like 1	>sp|P63244|GBLP_HUMAN Guanine nucleotide-binding protein subunit beta-2-like 1 OS=Homo sapiens GN=GNB2L1 PE=1 SV=3;>tr|J3KPE3|J3KPE3_HUMAN Guanine nucleotide-binding protein subunit beta-2-like 1 OS=Homo sapiens GN=GNB2L1 PE=1 SV=1;>tr|D6RAC2|D6RAC2_HUMAN	MULTI-MSMS		JACB153_3	MCF7 R10K8	535.3	2	530.301	1058.59	50528.7	0.32385	0.14292	0.46677	530.301	535.305	40.894	17.634	0.39548	40.894	40.722	41.117	0		0	0	0	0.0013209	1	14472	93.111	36.547	1	29.251	10.133	0
DNPGVVTCLDEAR	13	0	1	Unmodified	_DNPGVVTCLDEAR_			0	0	P22314;Q5JRS0;Q5JRR9	P22314	P22314	UBA1	Ubiquitin-like modifier-activating enzyme 1	>sp|P22314|UBA1_HUMAN Ubiquitin-like modifier-activating enzyme 1 OS=Homo sapiens GN=UBA1 PE=1 SV=3;>tr|Q5JRS0|Q5JRS0_HUMAN Ubiquitin-like modifier-activating enzyme 1 (Fragment) OS=Homo sapiens GN=UBA1 PE=1 SV=1;>tr|Q5JRR9|Q5JRR9_HUMAN Ubiquitin-like modi	MULTI-MSMS		JACB153_3	MCF7 R10K8	728.34	2	723.338	1444.66	40703.8	-1.1001	-0.69728	-1.7974	723.337	728.342	38.919	16.974	0.39083	38.919	38.71	39.101	0		0	0	0	1.4135e-06	1	13611	164.81	153.86	1	29.457	9.5446	0
VDQGTLFELILAANYLDIK	19	1	0	Unmodified	_VDQGTLFELILAANYLDIK_			0	0	P63208;P63208-2;F8W8N3;E7ERH2	P63208	P63208	SKP1	S-phase kinase-associated protein 1	>sp|P63208|SKP1_HUMAN S-phase kinase-associated protein 1 OS=Homo sapiens GN=SKP1 PE=1 SV=2;>sp|P63208-2|SKP1_HUMAN Isoform 2 of S-phase kinase-associated protein 1 OS=Homo sapiens GN=SKP1;>tr|F8W8N3|F8W8N3_HUMAN S-phase kinase-associated protein 1 (Fragme	MULTI-MSMS		JACB153_3	MCF7 R10K8	715.73	3	712.724	2135.15	41845.6	-0.21692	0.13796	-0.078961	713.059	715.73	101.21	87.53	0.48122	101.21	100.98	101.46	0		0	0	0	0.059473	1	36621	51.487	51.487	1	30.454	20.352	0
VINEPTAAALAYGLDK	16	1	0	Unmodified	_VINEPTAAALAYGLDK_			0	0	P38646	P38646	P38646	HSPA9	Stress-70 protein, mitochondrial	>sp|P38646|GRP75_HUMAN Stress-70 protein, mitochondrial OS=Homo sapiens GN=HSPA9 PE=1 SV=2	MULTI-MSMS		JACB153_3	MCF7 R10K8	827.45	2	823.443	1644.87	38821.1	-0.73587	0.37823	-0.35764	823.444	827.451	52.452	21.484	0.53304	52.452	52.209	52.742	-3.8147e-06		0	0	0	1.0659e-05	1	19271	102.08	102.08	1	30.903	8.565	0
VDLPLAVLSK	10	1	0	Unmodified	_VDLPLAVLSK_			0	0	Q9H773;H3BSA6	Q9H773	Q9H773	DCTPP1	dCTP pyrophosphatase 1	>sp|Q9H773|DCTP1_HUMAN dCTP pyrophosphatase 1 OS=Homo sapiens GN=DCTPP1 PE=1 SV=1;>tr|H3BSA6|H3BSA6_HUMAN dCTP pyrophosphatase 1 OS=Homo sapiens GN=DCTPP1 PE=1 SV=1	MULTI-MSMS		JACB153_3	MCF7 R10K8	531.84	2	527.829	1053.64	48233.9	0.25161	0.045546	0.29716	528.333	531.836	58.171	23.39	0.39737	58.171	57.996	58.393	0		0	0	0	0.0062832	1	21526	76.655	76.655	1	31.022	9.8074	0
LAADDFR	7	0	1	Unmodified	_LAADDFR_			0	0	CON__Q9QWL7;CON__P02533;P02533;CON__Q6IFX2;CON__P08727;P08727;C9JM50;CON__P19001;CON__A2A4G1;CON__P08779;P08779;K7EPJ9;CON__P13645;P13645;P05783;F8VZY9;CON__H-INV:HIT000015463;CON__Q497I4;Q92764;C4AM86;CON__Q92764;F5GWP8	CON__Q9QWL7;CON__P08727;CON__P13645;P05783;F5GWP8	CON__P08727	KRT14;KRT19;KRT16;KRT10;KRT18;KRT35;JUP	Keratin, type I cytoskeletal 14;Keratin, type I cytoskeletal 19;Keratin, type I cytoskeletal 16;Keratin, type I cytoskeletal 10;Keratin, type I cytoskeletal 18;Keratin, type I cuticular Ha5	>Q9QWL7 SWISS-PROT:Q9QWL7 Tax_Id=10090 Gene_Symbol=Krt17 Keratin, type I cytoskeletal 17;>P02533 SWISS-PROT:P02533 Tax_Id=9606 Gene_Symbol=KRT14 Keratin, type I cytoskeletal 14;>sp|P02533|K1C14_HUMAN Keratin, type I cytoskeletal 14 OS=Homo sapiens GN=KRT14	MULTI-MSMS		JACB153_3	MCF7 R10K8	404.2	2	404.203	806.392	53705.4	0.17494	-0.45808	-0.28313	404.204	409.207	26.563	12.857	1.1807	26.563	26.184	27.365	0		0	0	0	0.0073806	3	8195	94.262	52.76	1	32.224	8.2415	0
EIVDSYLPVILDIIK	15	1	0	Unmodified	_EIVDSYLPVILDIIK_			0	0	B1AVU8;P07602-3;C9JIZ6;P07602-2;P07602	B1AVU8	B1AVU8	PSAP	Proactivator polypeptide;Saposin-A;Saposin-B-Val;Saposin-B;Saposin-C;Saposin-D	>tr|B1AVU8|B1AVU8_HUMAN Saposin-D OS=Homo sapiens GN=PSAP PE=1 SV=1;>sp|P07602-3|SAP_HUMAN Isoform Sap-mu-9 of Prosaposin OS=Homo sapiens GN=PSAP;>tr|C9JIZ6|C9JIZ6_HUMAN Prosaposin OS=Homo sapiens GN=PSAP PE=1 SV=1;>sp|P07602-2|SAP_HUMAN Isoform Sap-mu-6 o	MULTI-MSMS		JACB153_3	MCF7 R10K8	580.34	3	577.338	1728.99	46065.1	0.060561	0.28993	0.35049	577.338	580.009	94.292	43.269	0.62928	94.292	93.949	94.578	0		0	0	0	0.0040834	2	34365	63.894	63.894	1	33.07	15.587	0
LTEGCSFR	8	0	1	Unmodified	_LTEGCSFR_			0	0	P42677;C9J1C5;H0YMV8;Q71UM5	P42677;H0YMV8	P42677	RPS27;RPS27L	40S ribosomal protein S27;40S ribosomal protein S27-like	>sp|P42677|RS27_HUMAN 40S ribosomal protein S27 OS=Homo sapiens GN=RPS27 PE=1 SV=3;>tr|C9J1C5|C9J1C5_HUMAN 40S ribosomal protein S27 OS=Homo sapiens GN=RPS27L PE=3 SV=1;>tr|H0YMV8|H0YMV8_HUMAN 40S ribosomal protein S27 OS=Homo sapiens GN=RPS27L PE=1 SV=1;>	MULTI-MSMS		JACB153_3	MCF7 R10K8	490.23	2	485.227	968.439	48984.3	-0.20519	-0.33614	-0.54134	485.228	490.231	21.077	11.029	0.58243	21.077	20.727	21.31	1.9073e-06		0	0	0	0.0025165	1	5765	99.802	72.03	1	33.093	11.899	0
LLDAVDTYIPVPAR	14	0	1	Unmodified	_LLDAVDTYIPVPAR_			0	0	P49411	P49411	P49411	TUFM	Elongation factor Tu, mitochondrial	>sp|P49411|EFTU_HUMAN Elongation factor Tu, mitochondrial OS=Homo sapiens GN=TUFM PE=1 SV=2	MULTI-MSMS		JACB153_3	MCF7 R10K8	776.93	2	771.93	1541.85	40249.8	-0.65099	-0.29254	-0.94353	771.929	776.934	60.807	24.271	0.4567	60.807	60.592	61.049	0		0	0	0	4.5277e-07	1	22525	158.11	149.29	1	33.346	10.059	0
ILDSVGIEADDDRLNK	16	1	1	Unmodified	_ILDSVGIEADDDRLNK_			0	0	P05387	P05387	P05387	RPLP2	60S acidic ribosomal protein P2	>sp|P05387|RLA2_HUMAN 60S acidic ribosomal protein P2 OS=Homo sapiens GN=RPLP2 PE=1 SV=1	MULTI-MSMS		JACB153_3	MCF7 R10K8	597.65	3	591.639	1771.9	45627.1	-0.16506	-0.45756	-0.62262	591.639	597.646	37.889	16.628	0.60267	37.889	37.686	38.289	0		0	0	0	1.1268e-08	1	13167	157.37	157.37	1	33.628	42.293	0
LGVIEDHSNR	10	0	1	Unmodified	_LGVIEDHSNR_			0	0	P14625;Q58FF3	P14625	P14625	HSP90B1;HSP90B2P	Endoplasmin;Putative endoplasmin-like protein	>sp|P14625|ENPL_HUMAN Endoplasmin OS=Homo sapiens GN=HSP90B1 PE=1 SV=1;>sp|Q58FF3|ENPLL_HUMAN Putative endoplasmin-like protein OS=Homo sapiens GN=HSP90B2P PE=5 SV=1	MULTI-MSMS		JACB153_3	MCF7 R10K8	383.87	3	380.532	1138.57	56190.9	-0.14515	0.036657	-0.10849	380.532	383.868	17.773	9.923	0.46686	17.773	17.583	18.05	0		0	0	0	0.0027581	1	4481	88.681	83.976	1	33.652	11.674	0
EIVDSYLPVILDIIK	15	1	0	Unmodified	_EIVDSYLPVILDIIK_			0	0	B1AVU8;P07602-3;C9JIZ6;P07602-2;P07602	B1AVU8	B1AVU8	PSAP	Proactivator polypeptide;Saposin-A;Saposin-B-Val;Saposin-B;Saposin-C;Saposin-D	>tr|B1AVU8|B1AVU8_HUMAN Saposin-D OS=Homo sapiens GN=PSAP PE=1 SV=1;>sp|P07602-3|SAP_HUMAN Isoform Sap-mu-9 of Prosaposin OS=Homo sapiens GN=PSAP;>tr|C9JIZ6|C9JIZ6_HUMAN Prosaposin OS=Homo sapiens GN=PSAP PE=1 SV=1;>sp|P07602-2|SAP_HUMAN Isoform Sap-mu-6 o	MULTI-MSMS		JACB153_3	MCF7 R10K8	869.51	2	865.503	1728.99	38170.2	-0.51255	0.21489	-0.29766	865.503	869.51	94.291	43.269	0.65434	94.291	93.969	94.624	0		0	0	0	1.8912e-05	2	34469	103.39	103.39	1	33.701	11.916	0
SADTLWGIQK	10	1	0	Unmodified	_SADTLWGIQK_			0	0	P00338-3;P00338;P00338-4	P00338-3	P00338-3	LDHA	L-lactate dehydrogenase A chain	>sp|P00338-3|LDHA_HUMAN Isoform 3 of L-lactate dehydrogenase A chain OS=Homo sapiens GN=LDHA;>sp|P00338|LDHA_HUMAN L-lactate dehydrogenase A chain OS=Homo sapiens GN=LDHA PE=1 SV=2;>sp|P00338-4|LDHA_HUMAN Isoform 4 of L-lactate dehydrogenase A chain OS=Hom	MULTI-MSMS		JACB153_3	MCF7 R10K8	563.8	2	559.796	1117.58	45471	-0.30639	-0.36488	-0.67127	559.795	563.803	41.598	17.863	0.55872	41.598	41.334	41.893	0		0	0	0	0.00032333	2	14737	144.77	119.92	1	34.248	7.9913	0
VAEDEAEAAAAAK	13	1	0	Unmodified	_VAEDEAEAAAAAK_			0	0	P08195-4;J3KPF3;P08195;F5GZS6;P08195-3;P08195-2;H0YFS2;F5H0E2;F5H867	P08195-4	P08195-4	SLC3A2	4F2 cell-surface antigen heavy chain	>sp|P08195-4|4F2_HUMAN Isoform 4 of 4F2 cell-surface antigen heavy chain OS=Homo sapiens GN=SLC3A2;>tr|J3KPF3|J3KPF3_HUMAN 4F2 cell-surface antigen heavy chain OS=Homo sapiens GN=SLC3A2 PE=1 SV=1;>sp|P08195|4F2_HUMAN 4F2 cell-surface antigen heavy chain OS	MULTI-MSMS		JACB153_3	MCF7 R10K8	627.31	2	623.302	1244.59	44267.1	-0.30479	-0.26328	-0.56807	623.302	627.308	20.853	10.947	0.40144	20.853	20.674	21.076	0		0	0	0	2.9798e-05	1	5663	142.91	123.81	1	34.775	11.67	0
DAQHYGGWEHR	11	0	1	Unmodified	_DAQHYGGWEHR_			0	0	Q14697;F5H6X6;Q14697-2;E9PKU7	Q14697;Q14697-2	Q14697-2	GANAB	Neutral alpha-glucosidase AB	>sp|Q14697|GANAB_HUMAN Neutral alpha-glucosidase AB OS=Homo sapiens GN=GANAB PE=1 SV=3;>tr|F5H6X6|F5H6X6_HUMAN Neutral alpha-glucosidase AB OS=Homo sapiens GN=GANAB PE=1 SV=1;>sp|Q14697-2|GANAB_HUMAN Isoform 2 of Neutral alpha-glucosidase AB OS=Homo sapien	MULTI-MSMS		JACB153_3	MCF7 R10K8	455.87	3	452.534	1354.58	52455.7	-0.20737	0.17413	-0.033235	452.534	455.87	16.875	9.6284	0.55091	16.875	16.656	17.207	0		0	0	0	0.00061192	1	4158	110.31	110.31	1	35.375	15.243	0
EMGTPDVR	8	0	1	Unmodified	_EMGTPDVR_			0	0	B7Z4C8;P62899-2;P62899;P62899-3;B7Z4E3;C9JU56;H7C2W9;B8ZZK4	B7Z4C8	B7Z4C8	RPL31	60S ribosomal protein L31	>tr|B7Z4C8|B7Z4C8_HUMAN 60S ribosomal protein L31 OS=Homo sapiens GN=RPL31 PE=1 SV=1;>sp|P62899-2|RL31_HUMAN Isoform 2 of 60S ribosomal protein L31 OS=Homo sapiens GN=RPL31;>sp|P62899|RL31_HUMAN 60S ribosomal protein L31 OS=Homo sapiens GN=RPL31 PE=1 SV=1;	MULTI-MSMS		JACB153_3	MCF7 R10K8	457.72	2	452.713	903.412	49861.7	-0.30828	-0.070649	-0.37893	452.713	457.718	20.964	10.99	0.6024	20.964	20.707	21.31	0		0	0	0	0.026952	1	5701	58.981	58.981	1	35.598	15.751	0
FNADEFEDMVAEK	13	1	0	Unmodified	_FNADEFEDMVAEK_			0	0	F8W7C6;P27635;X1WI28	F8W7C6;P27635	F8W7C6	RPL10	60S ribosomal protein L10	>tr|F8W7C6|F8W7C6_HUMAN 60S ribosomal protein L10 OS=Homo sapiens GN=RPL10 PE=1 SV=1;>sp|P27635|RL10_HUMAN 60S ribosomal protein L10 OS=Homo sapiens GN=RPL10 PE=1 SV=4;>tr|X1WI28|X1WI28_HUMAN 60S ribosomal protein L10 (Fragment) OS=Homo sapiens GN=RPL10 PE	MULTI-MSMS		JACB153_3	MCF7 R10K8	776.84	2	772.832	1543.65	40077.4	-0.51101	-0.091186	-0.6022	773.333	776.839	55.664	22.555	0.5077	55.664	55.447	55.955	0		0	0	0	1.2157e-05	1	20563	151.54	148.78	1	35.923	10.692	0
LASYLDK	7	1	0	Unmodified	_LASYLDK_			0	0	CON__Q9QWL7;CON__P02533;P02533;CON__P08727;P08727;C9JM50;CON__P19001;CON__A2A4G1;CON__P08779;P08779;K7EPJ9;CON__Q99456;Q99456;CON__P13645;P13645	CON__Q9QWL7;CON__P08727;CON__P13645	CON__P08727	KRT14;KRT19;KRT16;KRT12;KRT10	Keratin, type I cytoskeletal 14;Keratin, type I cytoskeletal 19;Keratin, type I cytoskeletal 16;Keratin, type I cytoskeletal 12;Keratin, type I cytoskeletal 10	>Q9QWL7 SWISS-PROT:Q9QWL7 Tax_Id=10090 Gene_Symbol=Krt17 Keratin, type I cytoskeletal 17;>P02533 SWISS-PROT:P02533 Tax_Id=9606 Gene_Symbol=KRT14 Keratin, type I cytoskeletal 14;>sp|P02533|K1C14_HUMAN Keratin, type I cytoskeletal 14 OS=Homo sapiens GN=KRT14	MULTI-MSMS		JACB153_3	MCF7 R10K8	409.23	2	405.224	808.433	53839.6	-0.2742	0.93538	0.66118	405.224	409.231	24.026	12.009	0.83245	24.026	23.715	24.547	0		0	0	0	0.009998	2	7075	87.323	48.516	1	36.055	8.531	0
EIFLSQPILLELEAPLK	17	1	0	Unmodified	_EIFLSQPILLELEAPLK_			0	0	P36873-2;P36873;F8VYE8;F8W0W8;F8VR82;F8WE71;P62136;P62136-2;E9PMD7;F5H037;F5H1L6;P62140;E7ETD8;C9JP48;C9J9S3	P36873-2;P62136;P62140	P62136	PPP1CC;PPP1CB;PPP1CA	Serine/threonine-protein phosphatase PP1-gamma catalytic subunit;Serine/threonine-protein phosphatase;Serine/threonine-protein phosphatase PP1-alpha catalytic subunit;Serine/threonine-protein phosphatase PP1-beta catalytic subunit	>sp|P36873-2|PP1G_HUMAN Isoform Gamma-2 of Serine/threonine-protein phosphatase PP1-gamma catalytic subunit OS=Homo sapiens GN=PPP1CC;>sp|P36873|PP1G_HUMAN Serine/threonine-protein phosphatase PP1-gamma catalytic subunit OS=Homo sapiens GN=PPP1CC PE=1 SV=1	MULTI-MSMS		JACB153_3	MCF7 R10K8	654.72	3	651.715	1952.12	44389.5	-0.092671	0.14007	0.0474	652.05	654.721	85.957	32.655	0.58052	85.957	85.715	86.296	-7.6294e-06		0	0	0	1.1813e-08	2	31513	140.22	140.22	1	36.121	14.361	0
LGELPSWILMR	11	0	1	Unmodified	_LGELPSWILMR_			0	0	P56134;P56134-3;G3V325;C9JU26;F5H4H2;P56134-2;C9JJT5;P56134-4	P56134	P56134	ATP5J2;PTCD1	ATP synthase subunit f, mitochondrial	>sp|P56134|ATPK_HUMAN ATP synthase subunit f, mitochondrial OS=Homo sapiens GN=ATP5J2 PE=1 SV=3;>sp|P56134-3|ATPK_HUMAN Isoform 3 of ATP synthase subunit f, mitochondrial OS=Homo sapiens GN=ATP5J2;>tr|G3V325|G3V325_HUMAN Pentatricopeptide repeat-containing	MULTI-MSMS		JACB153_3	MCF7 R10K8	662.87	2	657.866	1313.72	42723	-0.30259	0.10268	-0.19991	657.865	662.87	70.228	27.412	0.63416	70.228	69.88	70.514	0		0	0	0	0.00068341	2	25941	103.34	64.076	1	36.297	13.842	0
VCTLAIIDPGDSDIIR	16	0	1	Unmodified	_VCTLAIIDPGDSDIIR_			0	0	P62888;E5RI99	P62888	P62888	RPL30	60S ribosomal protein L30	>sp|P62888|RL30_HUMAN 60S ribosomal protein L30 OS=Homo sapiens GN=RPL30 PE=1 SV=2;>tr|E5RI99|E5RI99_HUMAN 60S ribosomal protein L30 (Fragment) OS=Homo sapiens GN=RPL30 PE=1 SV=1	MULTI-MSMS		JACB153_3	MCF7 R10K8	884.46	2	879.459	1756.9	37707.8	-0.65304	-0.40963	-1.0627	879.459	884.463	61.574	24.525	0.65959	61.574	61.372	62.032	0		0	0	0	1.5106e-07	1	22803	128.9	127.02	1	36.526	11.092	0
TITLEVEPSDTIENVK	16	1	0	Unmodified	_TITLEVEPSDTIENVK_			0	0	P62979;P0CG48;F5H041;Q96C32;P0CG47;J3QKN0;F5GXK7;F5H747;F5H388;B4DV12;F5H265;F5H2Z3;F5GYU3;P62987;F5H6Q2;J3QTR3;J3QS39;J3QRK5;J3QLP7;M0R1V7;F5GZ39;J3QSA3	P62979	P62979	RPS27A;UBC;UBB;UBA52	Ubiquitin-40S ribosomal protein S27a;Ubiquitin;40S ribosomal protein S27a;Polyubiquitin-C;Ubiquitin;Polyubiquitin-B;Ubiquitin;Ubiquitin-60S ribosomal protein L40;Ubiquitin;60S ribosomal protein L40	>sp|P62979|RS27A_HUMAN Ubiquitin-40S ribosomal protein S27a OS=Homo sapiens GN=RPS27A PE=1 SV=2;>sp|P0CG48|UBC_HUMAN Polyubiquitin-C OS=Homo sapiens GN=UBC PE=1 SV=3;>tr|F5H041|F5H041_HUMAN Polyubiquitin-C OS=Homo sapiens GN=UBC PE=2 SV=1;>tr|Q96C32|Q96C32	MULTI-MSMS		JACB153_3	MCF7 R10K8	898.47	2	894.467	1786.92	37251.1	-0.27703	-0.13841	-0.41544	894.466	898.474	50.148	20.716	0.49481	50.148	49.927	50.421	0		0	0	0	2.6069e-12	1	18315	195.84	195.84	1	36.545	7.2951	0
ADEWLMK	7	1	0	Unmodified	_ADEWLMK_			0	0	P35579;P35579-2;P35580-4;P35580-3;F8W6L6;P35580-2;P35580	P35579;P35580-4	P35579	MYH9;MYH10	Myosin-9;Myosin-10	>sp|P35579|MYH9_HUMAN Myosin-9 OS=Homo sapiens GN=MYH9 PE=1 SV=4;>sp|P35579-2|MYH9_HUMAN Isoform 2 of Myosin-9 OS=Homo sapiens GN=MYH9;>sp|P35580-4|MYH10_HUMAN Isoform 4 of Myosin-10 OS=Homo sapiens GN=MYH10;>sp|P35580-3|MYH10_HUMAN Isoform 3 of Myosin-10	MULTI-MSMS		JACB153_3	MCF7 R10K8	450.72	2	446.715	891.416	50790.4	0.13049	-0.43712	-0.30663	446.716	450.722	37.487	16.494	0.45581	37.487	37.28	37.736	0		0	0	0	0.01817	1	12994	66.799	43.97	1	36.696	12.76	0
DLYDAGVK	8	1	0	Unmodified	_DLYDAGVK_			0	0	P07355-2;P07355;H0YN42;A6NMY6;H0YMU9;H0YMD0;H0YM50;H0YNP5;H0YL33;H0YN28	P07355-2	P07355-2	ANXA2;ANXA2P2	Annexin A2;Annexin;Putative annexin A2-like protein	>sp|P07355-2|ANXA2_HUMAN Isoform 2 of Annexin A2 OS=Homo sapiens GN=ANXA2;>sp|P07355|ANXA2_HUMAN Annexin A2 OS=Homo sapiens GN=ANXA2 PE=1 SV=2;>tr|H0YN42|H0YN42_HUMAN Annexin (Fragment) OS=Homo sapiens GN=ANXA2 PE=1 SV=1;>sp|A6NMY6|AXA2L_HUMAN Putative ann	MULTI-MSMS		JACB153_3	MCF7 R10K8	444.73	2	440.724	879.434	50928.4	-0.21374	-0.73457	-0.94831	440.724	444.731	29.752	13.917	0.65221	29.752	29.503	30.155	0		0	0	0	0.020371	1	9580	60.59	4.5791	1	36.7	9.921	0
GVDLVLNSLAEEK	13	1	0	Unmodified	_GVDLVLNSLAEEK_			0	0	P49327	P49327	P49327	FASN	Fatty acid synthase;[Acyl-carrier-protein] S-acetyltransferase;[Acyl-carrier-protein] S-malonyltransferase;3-oxoacyl-[acyl-carrier-protein] synthase;3-oxoacyl-[acyl-carrier-protein] reductase;3-hydroxypalmitoyl-[acyl-carrier-protein] dehydratase;Enoyl-[acyl-carrier-protein] reductase;Oleoyl-[acyl-carrier-protein] hydrolase	>sp|P49327|FAS_HUMAN Fatty acid synthase OS=Homo sapiens GN=FASN PE=1 SV=3	MULTI-MSMS		JACB153_3	MCF7 R10K8	697.88	2	693.877	1385.74	41624.4	-0.61596	0.47011	-0.14584	693.879	697.885	54.576	22.192	0.53472	54.576	54.347	54.882	-3.8147e-06		0	0	0	4.5927e-05	1	20098	135.02	119.92	1	37.313	10.49	0
MDVFLMIR	8	0	1	Acetyl (Protein N-term)	_(ac)MDVFLMIR_			1	0	Q15370;Q15370-2	Q15370	Q15370	TCEB2	Transcription elongation factor B polypeptide 2	>sp|Q15370|ELOB_HUMAN Transcription elongation factor B polypeptide 2 OS=Homo sapiens GN=TCEB2 PE=1 SV=1;>sp|Q15370-2|ELOB_HUMAN Isoform 2 of Transcription elongation factor B polypeptide 2 OS=Homo sapiens GN=TCEB2	MULTI-MSMS		JACB153_3	MCF7 R10K8	538.78	2	533.775	1065.54	46995.8	0.20364	-0.28275	-0.079112	533.775	538.779	97.212	61.97	0.66164	97.212	96.936	97.598	0		0	0	0	0.0043803	3	35347	83.005	83.005	1	37.61	23.852	0
AVVGVVAGGGR	11	0	1	Unmodified	_AVVGVVAGGGR_			0	0	P62917;E9PKU4;E9PKZ0;E9PP36	P62917	P62917	RPL8	60S ribosomal protein L8	>sp|P62917|RL8_HUMAN 60S ribosomal protein L8 OS=Homo sapiens GN=RPL8 PE=1 SV=2;>tr|E9PKU4|E9PKU4_HUMAN 60S ribosomal protein L8 (Fragment) OS=Homo sapiens GN=RPL8 PE=1 SV=1;>tr|E9PKZ0|E9PKZ0_HUMAN 60S ribosomal protein L8 (Fragment) OS=Homo sapiens GN=RPL	MULTI-MSMS		JACB153_3	MCF7 R10K8	476.28	2	471.28	940.545	52083.9	-0.44603	0.81969	0.37366	471.281	476.284	23.752	11.917	0.35176	23.752	23.609	23.961	0		0	0	0	0.0049001	1	6907	84.17	53.558	1	37.672	11.797	0
HNIMDFAMPYFIQVMK	16	1	0	Unmodified	_HNIMDFAMPYFIQVMK_			0	0	Q00610;Q00610-2;J3KS13;K7EJJ5;J3KRF5	Q00610	Q00610	CLTC	Clathrin heavy chain 1	>sp|Q00610|CLH1_HUMAN Clathrin heavy chain 1 OS=Homo sapiens GN=CLTC PE=1 SV=5;>sp|Q00610-2|CLH1_HUMAN Isoform 2 of Clathrin heavy chain 1 OS=Homo sapiens GN=CLTC;>tr|J3KS13|J3KS13_HUMAN Clathrin heavy chain 1 OS=Homo sapiens GN=CLTC PE=1 SV=1;>tr|K7EJJ5|K	MULTI-MSMS		JACB153_3	MCF7 R10K8	665.33	3	662.321	1983.94	43194.5	0.00099462	-0.58075	-0.57976	662.321	665.327	80.735	30.913	0.72614	80.735	80.42	81.146	0		0	0	0	1.2205e-05	2	29773	98.676	98.676	1	37.976	15.041	0
SHTILLVQPTK	11	1	0	Acetyl (Protein N-term)	_(ac)SHTILLVQPTK_			1	0	P84090;G3V279	P84090	P84090	ERH	Enhancer of rudimentary homolog	>sp|P84090|ERH_HUMAN Enhancer of rudimentary homolog OS=Homo sapiens GN=ERH PE=1 SV=1;>tr|G3V279|G3V279_HUMAN Enhancer of rudimentary homolog OS=Homo sapiens GN=ERH PE=1 SV=1	MULTI-MSMS		JACB153_3	MCF7 R10K8	643.88	2	639.874	1277.73	43764.7	-0.9879	0.034179	-0.95372	639.875	643.882	41.64	17.88	0.45946	41.64	41.416	41.875	-3.8147e-06		0	0	0	5.2013e-10	1	14791	215.46	215.46	1	38.047	9.8277	0
HLQLAIR	7	0	1	Unmodified	_HLQLAIR_			0	0	P04908;P0C0S8;P20671;Q6FI13;Q7L7L0;Q93077;Q16777;Q9BTM1;Q96KK5;Q99878;Q9BTM1-2;H0YFX9;P0C0S5;Q71UI9;C9J0D1;Q71UI9-2;Q71UI9-4;Q71UI9-3;C9J386;P16104;Q96QV6	P04908;P0C0S5;P16104	P04908	HIST1H2AB;HIST1H2AG;HIST1H2AD;HIST2H2AA3;HIST3H2A;HIST1H2AC;HIST2H2AC;H2AFJ;HIST1H2AH;HIST1H2AJ;H2AFZ;H2AFV;H2AFX;HIST1H2AA	Histone H2A type 1-B/E;Histone H2A type 1;Histone H2A type 1-D;Histone H2A type 2-A;Histone H2A type 3;Histone H2A type 1-C;Histone H2A type 2-C;Histone H2A.J;Histone H2A type 1-H;Histone H2A type 1-J;Histone H2A;Histone H2A.Z;Histone H2A.V;Histone H2A.x;Histone H2A type 1-A	>sp|P04908|H2A1B_HUMAN Histone H2A type 1-B/E OS=Homo sapiens GN=HIST1H2AB PE=1 SV=2;>sp|P0C0S8|H2A1_HUMAN Histone H2A type 1 OS=Homo sapiens GN=HIST1H2AG PE=1 SV=2;>sp|P20671|H2A1D_HUMAN Histone H2A type 1-D OS=Homo sapiens GN=HIST1H2AD PE=1 SV=2;>sp|Q6FI	MULTI-MSMS		JACB153_3	MCF7 R10K8	430.77	2	425.767	849.518	53447.9	-0.45014	0.99636	0.54622	425.767	430.771	24.008	12.002	0.60629	24.008	23.833	24.44	0		0	0	0	0.038803	1	7148	55.717	9.1508	1	38.682	11.37	0
VVEHPEFLK	9	1	0	Unmodified	_VVEHPEFLK_			0	0	P06396;P06396-3;P06396-4;P06396-2;CON__Q3SX14;Q5T0I0;Q5T0I1	P06396	P06396	GSN	Gelsolin	>sp|P06396|GELS_HUMAN Gelsolin OS=Homo sapiens GN=GSN PE=1 SV=1;>sp|P06396-3|GELS_HUMAN Isoform 3 of Gelsolin OS=Homo sapiens GN=GSN;>sp|P06396-4|GELS_HUMAN Isoform 4 of Gelsolin OS=Homo sapiens GN=GSN;>sp|P06396-2|GELS_HUMAN Isoform 2 of Gelsolin OS=Homo	MULTI-MSMS		JACB153_3	MCF7 R10K8	369.21	3	366.538	1096.59	57518.7	-0.638	-0.34999	-0.98799	366.538	369.209	25.738	12.577	0.56796	25.738	25.555	26.123	0		0	0	0	0.0075961	1	7794	71.349	34.158	1	38.751	11.315	0
LSDQFHDILIR	11	0	1	Unmodified	_LSDQFHDILIR_			0	0	O75340;O75340-2;H0Y9X3	O75340	O75340	PDCD6	Programmed cell death protein 6	>sp|O75340|PDCD6_HUMAN Programmed cell death protein 6 OS=Homo sapiens GN=PDCD6 PE=1 SV=1;>sp|O75340-2|PDCD6_HUMAN Isoform 2 of Programmed cell death protein 6 OS=Homo sapiens GN=PDCD6;>tr|H0Y9X3|H0Y9X3_HUMAN Programmed cell death protein 6 (Fragment) OS=H	MULTI-MSMS		JACB153_3	MCF7 R10K8	456.25	3	452.914	1355.72	51772.7	0.30548	-0.52151	-0.21602	453.247	456.25	43.136	18.379	0.31785	43.136	42.985	43.303	0		0	0	0	0.00056562	1	15455	114.82	92.585	1	39.106	13.84	0
NFGIGQDIQPK	11	1	0	Unmodified	_NFGIGQDIQPK_			0	0	P62424;Q5T8U3	P62424	P62424	RPL7A	60S ribosomal protein L7a	>sp|P62424|RL7A_HUMAN 60S ribosomal protein L7a OS=Homo sapiens GN=RPL7A PE=1 SV=2;>tr|Q5T8U3|Q5T8U3_HUMAN 60S ribosomal protein L7a (Fragment) OS=Homo sapiens GN=RPL7A PE=1 SV=1	MULTI-MSMS		JACB153_3	MCF7 R10K8	612.83	2	608.82	1215.62	44762.7	0.21922	-0.72944	-0.51022	608.818	612.826	37.499	16.502	0.45581	37.499	37.28	37.736	0		0	0	0	0.00061427	1	12989	110.08	110.08	1	39.143	10.245	0
ILAGMVK	7	1	0	Unmodified	_ILAGMVK_			0	0	P06401;P06401-5;P06401-2;P06401-3;P06401-4	P06401	P06401	PGR	Progesterone receptor	>sp|P06401|PRGR_HUMAN Progesterone receptor OS=Homo sapiens GN=PGR PE=1 SV=4;>sp|P06401-5|PRGR_HUMAN Isoform 5 of Progesterone receptor OS=Homo sapiens GN=PGR;>sp|P06401-2|PRGR_HUMAN Isoform A of Progesterone receptor OS=Homo sapiens GN=PGR;>sp|P06401-3|PR	MULTI-MSMS		JACB153_3	MCF7 R10K8	370.23	2	366.228	730.441	58625.2	-0.33783	-0.3726	-0.71043	366.228	370.235	31.587	14.53	0.31831	31.587	31.44	31.758	-1.9073e-06		0	0	0	0.083811	1	10400	39.542	39.542	1	39.587	12.446	0
TFTDCFNCLPIAAIVDEK	18	1	0	Unmodified	_TFTDCFNCLPIAAIVDEK_			0	0	P36873-2;P36873;F8VYE8;F8W0W8;F8VR82;H0Y3Y6;P62136;P62136-2;P62136-3;P62140;E7ETD8	P36873-2;P62136;P62140	P62136	PPP1CC;PPP1CB;PPP1CA	Serine/threonine-protein phosphatase PP1-gamma catalytic subunit;Serine/threonine-protein phosphatase;Serine/threonine-protein phosphatase PP1-alpha catalytic subunit;Serine/threonine-protein phosphatase PP1-beta catalytic subunit	>sp|P36873-2|PP1G_HUMAN Isoform Gamma-2 of Serine/threonine-protein phosphatase PP1-gamma catalytic subunit OS=Homo sapiens GN=PPP1CC;>sp|P36873|PP1G_HUMAN Serine/threonine-protein phosphatase PP1-gamma catalytic subunit OS=Homo sapiens GN=PPP1CC PE=1 SV=1	MULTI-MSMS		JACB153_3	MCF7 R10K8	708.01	3	705.336	2112.99	42096	-0.038029	-1.4503	-1.4883	705.67	708.341	76.315	29.439	0.62526	76.315	76.083	76.708	0		0	0	0	4.0572e-07	1	28128	106.87	106.87	1	39.587	13.754	0
RFDDAVVQSDMK	12	1	1	Unmodified	_RFDDAVVQSDMK_			0	0	P11142;E9PKE3;P11142-2;E9PNE6;E9PN89;E9PLF4;E9PQK7;E9PQQ4;E9PPY6;E9PN25;E9PK54	P11142;E9PK54	P11142	HSPA8	Heat shock cognate 71 kDa protein	>sp|P11142|HSP7C_HUMAN Heat shock cognate 71 kDa protein OS=Homo sapiens GN=HSPA8 PE=1 SV=1;>tr|E9PKE3|E9PKE3_HUMAN Heat shock cognate 71 kDa protein OS=Homo sapiens GN=HSPA8 PE=1 SV=1;>sp|P11142-2|HSP7C_HUMAN Isoform 2 of Heat shock cognate 71 kDa protein	MULTI-MSMS		JACB153_3	MCF7 R10K8	476.9	3	470.894	1409.66	48428.7	-0.5237	-0.69008	-1.2138	470.896	476.902	27.636	13.215	0.4775	27.636	27.452	27.93	0		0	0	0	0.021021	1	8611	61.375	53.271	1	40.128	50.469	0
RAPFDLFENK	10	1	1	Unmodified	_RAPFDLFENK_			0	0	P08238;Q58FF7	P08238	P08238	HSP90AB1;HSP90AB3P	Heat shock protein HSP 90-beta;Putative heat shock protein HSP 90-beta-3	>sp|P08238|HS90B_HUMAN Heat shock protein HSP 90-beta OS=Homo sapiens GN=HSP90AB1 PE=1 SV=4;>sp|Q58FF7|H90B3_HUMAN Putative heat shock protein HSP 90-beta-3 OS=Homo sapiens GN=HSP90AB3P PE=5 SV=1	MULTI-MSMS		JACB153_3	MCF7 R10K8	627.83	2	618.822	1235.63	42309.5	0.061488	-0.15594	-0.094453	618.822	627.833	43.938	18.646	1.0877	43.938	43.395	44.483	0		0	0	0	0.00067778	3	15984	128.01	128.01	1	40.373	50.777	0
VDIDAPDVDVHGPDWHLK	18	1	0	Unmodified	_VDIDAPDVDVHGPDWHLK_			0	0	Q09666	Q09666	Q09666	AHNAK	Neuroblast differentiation-associated protein AHNAK	>sp|Q09666|AHNK_HUMAN Neuroblast differentiation-associated protein AHNAK OS=Homo sapiens GN=AHNAK PE=1 SV=2	MULTI-MSMS		JACB153_3	MCF7 R10K8	509.75	4	507.751	2026.97	49223.4	-0.39569	0.68031	0.28463	507.752	510.006	46.269	19.426	0.67189	46.269	46.005	46.677	0		0	0	0	0.00092685	2	16892	78.95	78.95	1	40.587	10.147	0
VMVQPINLIFR	11	0	1	Unmodified	_VMVQPINLIFR_			0	0	P62304	P62304	P62304	SNRPE	Small nuclear ribonucleoprotein E	>sp|P62304|RUXE_HUMAN Small nuclear ribonucleoprotein E OS=Homo sapiens GN=SNRPE PE=1 SV=1	MULTI-MSMS		JACB153_3	MCF7 R10K8	670.39	2	665.389	1328.76	42777.9	-0.34527	-0.25691	-0.60219	665.389	670.393	66.734	26.245	0.49934	66.734	66.488	66.987	7.6294e-06		0	0	0	0.00072856	1	24704	98.943	98.943	1	40.81	14.036	0
VGYTPDWIFLLR	12	0	1	Unmodified	_VGYTPDWIFLLR_			0	0	Q00610;Q00610-2;P53675;P53675-2;J3KR87	Q00610	Q00610	CLTC;CLTCL1	Clathrin heavy chain 1;Clathrin heavy chain 2	>sp|Q00610|CLH1_HUMAN Clathrin heavy chain 1 OS=Homo sapiens GN=CLTC PE=1 SV=5;>sp|Q00610-2|CLH1_HUMAN Isoform 2 of Clathrin heavy chain 1 OS=Homo sapiens GN=CLTC;>sp|P53675|CLH2_HUMAN Clathrin heavy chain 2 OS=Homo sapiens GN=CLTCL1 PE=1 SV=2;>sp|P53675-2	MULTI-MSMS		JACB153_3	MCF7 R10K8	745.91	2	740.403	1478.79	40837.3	-0.23874	0.37117	0.13243	740.403	745.408	79.687	30.561	0.79153	79.687	79.366	80.158	0		0	0	0	0.00016293	2	29296	119.45	119.45	1	41.598	14.027	0
PASGPIRPIVR	11	0	2	Unmodified	_PASGPIRPIVR_			0	0	P26373;P26373-2;J3QSB4	P26373	P26373	RPL13	60S ribosomal protein L13	>sp|P26373|RL13_HUMAN 60S ribosomal protein L13 OS=Homo sapiens GN=RPL13 PE=1 SV=4;>sp|P26373-2|RL13_HUMAN Isoform 2 of 60S ribosomal protein L13 OS=Homo sapiens GN=RPL13;>tr|J3QSB4|J3QSB4_HUMAN 60S ribosomal protein L13 (Fragment) OS=Homo sapiens GN=RPL13	MULTI-MSMS		JACB153_3	MCF7 R10K8	394.91	3	388.24	1161.7	54983.1	-0.12014	0.67033	0.55018	388.24	394.912	21.762	11.253	0.4923	21.762	21.624	22.116	1.9073e-06		0	0	0	0.033265	1	6073	63.415	63.415	1	41.727	53.34	0
VGFAEAAR	8	0	1	Unmodified	_VGFAEAAR_			0	0	P07339;H7C1V0	P07339	P07339	CTSD	Cathepsin D;Cathepsin D light chain;Cathepsin D heavy chain	>sp|P07339|CATD_HUMAN Cathepsin D OS=Homo sapiens GN=CTSD PE=1 SV=1;>tr|H7C1V0|H7C1V0_HUMAN Cathepsin D light chain (Fragment) OS=Homo sapiens GN=CTSD PE=1 SV=1	MULTI-MSMS		JACB153_3	MCF7 R10K8	415.72	2	410.719	819.424	53117.3	0.4062	-0.65611	-0.24991	410.719	415.723	22.541	11.513	0.62679	22.541	22.295	22.922	0		0	0	0	0.002598	1	6372	95.909	58.889	1	41.972	14.43	0
FDGILGMAYPR	11	0	1	Unmodified	_FDGILGMAYPR_			0	0	P07339;H7C469;C9JH19;F8WD96;F8W787	P07339	P07339	CTSD	Cathepsin D;Cathepsin D light chain;Cathepsin D heavy chain	>sp|P07339|CATD_HUMAN Cathepsin D OS=Homo sapiens GN=CTSD PE=1 SV=1;>tr|H7C469|H7C469_HUMAN Uncharacterized protein (Fragment) OS=Homo sapiens PE=3 SV=1;>tr|C9JH19|C9JH19_HUMAN Cathepsin D light chain (Fragment) OS=Homo sapiens GN=CTSD PE=2 SV=1;>tr|F8WD96	MULTI-MSMS		JACB153_3	MCF7 R10K8	625.32	2	620.313	1238.61	43564.3	0.16156	-0.91978	-0.75821	620.313	625.317	58.468	23.485	0.64029	58.468	58.213	58.853	0		0	0	0	0.0047567	1	21625	84.507	84.507	1	42.481	11.648	0
LSPEDYTLK	9	1	0	Unmodified	_LSPEDYTLK_			0	0	P07339;H7C469;H7C1V0	P07339	P07339	CTSD	Cathepsin D;Cathepsin D light chain;Cathepsin D heavy chain	>sp|P07339|CATD_HUMAN Cathepsin D OS=Homo sapiens GN=CTSD PE=1 SV=1;>tr|H7C469|H7C469_HUMAN Uncharacterized protein (Fragment) OS=Homo sapiens PE=3 SV=1;>tr|H7C1V0|H7C1V0_HUMAN Cathepsin D light chain (Fragment) OS=Homo sapiens GN=CTSD PE=1 SV=1	MULTI-MSMS		JACB153_3	MCF7 R10K8	537.28	2	533.277	1064.54	47520.6	0.54141	0.43063	0.97204	533.277	537.284	36.955	16.322	0.61707	36.955	36.616	37.233	0		0	0	0	0.0031913	1	12741	86.624	59.295	1	42.874	10.781	0
ACQSIYPLHDVFVR	14	0	1	Unmodified	_ACQSIYPLHDVFVR_			0	0	P61247;D6RAT0;D6RG13;H0Y9Y4;D6RB09;D6R9B6	P61247	P61247	RPS3A	40S ribosomal protein S3a	>sp|P61247|RS3A_HUMAN 40S ribosomal protein S3a OS=Homo sapiens GN=RPS3A PE=1 SV=2;>tr|D6RAT0|D6RAT0_HUMAN 40S ribosomal protein S3a OS=Homo sapiens GN=RPS3A PE=1 SV=1;>tr|D6RG13|D6RG13_HUMAN 40S ribosomal protein S3a (Fragment) OS=Homo sapiens GN=RPS3A PE	MULTI-MSMS		JACB153_3	MCF7 R10K8	572.29	3	568.956	1703.85	46692.4	-0.37822	-0.10966	-0.48788	569.624	572.292	46.827	19.609	0.73582	46.827	46.434	47.17	0		0	0	0	5.6295e-05	2	16956	105.14	105.14	1	42.894	12.058	0
VTIAQGGVLPNIQAVLLPK	19	1	0	Unmodified	_VTIAQGGVLPNIQAVLLPK_			0	0	P04908;P0C0S8;P20671;Q6FI13;Q7L7L0;Q93077;Q16777;Q9BTM1;Q96KK5;Q99878;H0YFX9	P04908	P04908	HIST1H2AB;HIST1H2AG;HIST1H2AD;HIST2H2AA3;HIST3H2A;HIST1H2AC;HIST2H2AC;H2AFJ;HIST1H2AH;HIST1H2AJ	Histone H2A type 1-B/E;Histone H2A type 1;Histone H2A type 1-D;Histone H2A type 2-A;Histone H2A type 3;Histone H2A type 1-C;Histone H2A type 2-C;Histone H2A.J;Histone H2A type 1-H;Histone H2A type 1-J;Histone H2A	>sp|P04908|H2A1B_HUMAN Histone H2A type 1-B/E OS=Homo sapiens GN=HIST1H2AB PE=1 SV=2;>sp|P0C0S8|H2A1_HUMAN Histone H2A type 1 OS=Homo sapiens GN=HIST1H2AG PE=1 SV=2;>sp|P20671|H2A1D_HUMAN Histone H2A type 1-D OS=Homo sapiens GN=HIST1H2AD PE=1 SV=2;>sp|Q6FI	MULTI-MSMS		JACB153_3	MCF7 R10K8	647.07	3	644.394	1930.16	44063	0.1119	-0.077705	0.034199	644.729	647.4	72.695	28.237	0.82409	72.695	72.343	73.167	-7.6294e-06		0	0	0	4.5362e-11	3	26913	143.67	143.67	1	43.751	11.413	0
YYTVFDR	7	0	1	Unmodified	_YYTVFDR_			0	0	P07339;H7C1V0	P07339	P07339	CTSD	Cathepsin D;Cathepsin D light chain;Cathepsin D heavy chain	>sp|P07339|CATD_HUMAN Cathepsin D OS=Homo sapiens GN=CTSD PE=1 SV=1;>tr|H7C1V0|H7C1V0_HUMAN Cathepsin D light chain (Fragment) OS=Homo sapiens GN=CTSD PE=1 SV=1	MULTI-MSMS		JACB153_3	MCF7 R10K8	487.24	2	482.232	962.45	50143.5	0.25207	-0.11719	0.13488	482.232	487.236	37.621	16.543	0.71074	37.621	37.344	38.055	0		0	0	0	0.013513	1	13055	78.496	63.827	1	44.364	13.457	0
IITLAGPTNAIFK	13	1	0	Unmodified	_IITLAGPTNAIFK_			0	0	Q15366-6;Q15366;H3BRU6;B4DLC0;B4DXP5;F8VXH9;F8W0G4;F8W1G6;Q15366-3;Q15366-2;Q15366-4;Q15366-5;F8VZX2;Q15366-7	Q15366-6;Q15366-3	Q15366-3	PCBP2	Poly(rC)-binding protein 2	>sp|Q15366-6|PCBP2_HUMAN Isoform 6 of Poly(rC)-binding protein 2 OS=Homo sapiens GN=PCBP2;>sp|Q15366|PCBP2_HUMAN Poly(rC)-binding protein 2 OS=Homo sapiens GN=PCBP2 PE=1 SV=1;>tr|H3BRU6|H3BRU6_HUMAN Poly(rC)-binding protein 2 (Fragment) OS=Homo sapiens GN=	MULTI-MSMS		JACB153_3	MCF7 R10K8	683.91	2	679.906	1357.8	42701.1	-0.66829	1.1123	0.44404	680.408	683.914	56.718	22.909	0.55222	56.718	56.497	57.05	0		0	0	0	0.00015942	1	20955	105.13	105.13	1	44.584	11.69	0
EIFLSQPILLELEAPLK	17	1	0	Unmodified	_EIFLSQPILLELEAPLK_			0	0	P36873-2;P36873;F8VYE8;F8W0W8;F8VR82;F8WE71;P62136;P62136-2;E9PMD7;F5H037;F5H1L6;P62140;E7ETD8;C9JP48;C9J9S3	P36873-2;P62136;P62140	P62136	PPP1CC;PPP1CB;PPP1CA	Serine/threonine-protein phosphatase PP1-gamma catalytic subunit;Serine/threonine-protein phosphatase;Serine/threonine-protein phosphatase PP1-alpha catalytic subunit;Serine/threonine-protein phosphatase PP1-beta catalytic subunit	>sp|P36873-2|PP1G_HUMAN Isoform Gamma-2 of Serine/threonine-protein phosphatase PP1-gamma catalytic subunit OS=Homo sapiens GN=PPP1CC;>sp|P36873|PP1G_HUMAN Serine/threonine-protein phosphatase PP1-gamma catalytic subunit OS=Homo sapiens GN=PPP1CC PE=1 SV=1	MULTI-MSMS		JACB153_3	MCF7 R10K8	981.58	2	977.069	1952.12	35861.9	-0.41309	-0.027537	-0.44063	977.069	981.577	85.953	32.649	0.68697	85.953	85.699	86.386	0		0	0	0	4.3938e-10	1	31503	165.45	165.45	1	44.801	14.098	0
DQVANSAFVER	11	0	1	Unmodified	_DQVANSAFVER_			0	0	P07900-2;P07900;Q86U12	P07900-2	P07900-2	HSP90AA1	Heat shock protein HSP 90-alpha	>sp|P07900-2|HS90A_HUMAN Isoform 2 of Heat shock protein HSP 90-alpha OS=Homo sapiens GN=HSP90AA1;>sp|P07900|HS90A_HUMAN Heat shock protein HSP 90-alpha OS=Homo sapiens GN=HSP90AA1 PE=1 SV=5;>tr|Q86U12|Q86U12_HUMAN Full-length cDNA clone CS0CAP007YF18 of T	MULTI-MSMS		JACB153_3	MCF7 R10K8	623.31	2	618.304	1234.59	43715.4	-0.06025	0.10826	0.048007	618.303	623.309	29.861	13.958	0.66052	29.861	29.566	30.227	-1.9073e-06		0	0	0	6.5459e-06	1	9600	171.05	171.05	1	44.928	11.063	0
AFMTADLPNELIELLEK	17	1	0	Unmodified	_AFMTADLPNELIELLEK_			0	0	Q00610;Q00610-2;P53675;P53675-2;J3KR87	Q00610	Q00610	CLTC;CLTCL1	Clathrin heavy chain 1;Clathrin heavy chain 2	>sp|Q00610|CLH1_HUMAN Clathrin heavy chain 1 OS=Homo sapiens GN=CLTC PE=1 SV=5;>sp|Q00610-2|CLH1_HUMAN Isoform 2 of Clathrin heavy chain 1 OS=Homo sapiens GN=CLTC;>sp|P53675|CLH2_HUMAN Clathrin heavy chain 2 OS=Homo sapiens GN=CLTCL1 PE=1 SV=2;>sp|P53675-2	MULTI-MSMS		JACB153_3	MCF7 R10K8	978.02	2	974.011	1946.01	34728.1	-0.5534	-0.066791	-0.6202	974.011	978.018	93.634	39.092	0.68889	93.634	93.323	94.012	0		0	0	0	3.7269e-15	2	34231	218.98	218.98	1	45.166	14.297	0
FFEVILIDPFHK	12	1	0	Unmodified	_FFEVILIDPFHK_			0	0	P61313;E7EQV9;E7ENU7	P61313	P61313	RPL15	60S ribosomal protein L15;Ribosomal protein L15	>sp|P61313|RL15_HUMAN 60S ribosomal protein L15 OS=Homo sapiens GN=RPL15 PE=1 SV=2;>tr|E7EQV9|E7EQV9_HUMAN Ribosomal protein L15 (Fragment) OS=Homo sapiens GN=RPL15 PE=1 SV=1;>tr|E7ENU7|E7ENU7_HUMAN Ribosomal protein L15 (Fragment) OS=Homo sapiens GN=RPL15	MULTI-MSMS		JACB153_3	MCF7 R10K8	504.95	3	502.278	1503.81	49429.6	0.53328	-0.12336	0.40991	502.612	504.949	71.906	27.968	0.50053	71.906	71.703	72.204	-7.6294e-06		0	0	0	0.0091945	1	26549	77.593	77.593	1	45.347	15.615	0
VTIAQGGVLPNIQAVLLPK	19	1	0	Unmodified	_VTIAQGGVLPNIQAVLLPK_			0	0	P04908;P0C0S8;P20671;Q6FI13;Q7L7L0;Q93077;Q16777;Q9BTM1;Q96KK5;Q99878;H0YFX9	P04908	P04908	HIST1H2AB;HIST1H2AG;HIST1H2AD;HIST2H2AA3;HIST3H2A;HIST1H2AC;HIST2H2AC;H2AFJ;HIST1H2AH;HIST1H2AJ	Histone H2A type 1-B/E;Histone H2A type 1;Histone H2A type 1-D;Histone H2A type 2-A;Histone H2A type 3;Histone H2A type 1-C;Histone H2A type 2-C;Histone H2A.J;Histone H2A type 1-H;Histone H2A type 1-J;Histone H2A	>sp|P04908|H2A1B_HUMAN Histone H2A type 1-B/E OS=Homo sapiens GN=HIST1H2AB PE=1 SV=2;>sp|P0C0S8|H2A1_HUMAN Histone H2A type 1 OS=Homo sapiens GN=HIST1H2AG PE=1 SV=2;>sp|P20671|H2A1D_HUMAN Histone H2A type 1-D OS=Homo sapiens GN=HIST1H2AD PE=1 SV=2;>sp|Q6FI	MULTI-MSMS		JACB153_3	MCF7 R10K8	970.6	2	966.088	1930.16	36032.6	-0.22926	-0.18169	-0.41096	966.088	970.596	72.696	28.237	0.6432	72.696	72.363	73.007	-7.6294e-06		0	0	0	1.7861e-11	3	26914	151.57	151.57	1	45.377	12.015	0
TAAFLLPILSQIYSDGPGEALR	22	0	1	Unmodified	_TAAFLLPILSQIYSDGPGEALR_			0	0	O00571;O00571-2	O00571	O00571	DDX3X	ATP-dependent RNA helicase DDX3X	>sp|O00571|DDX3X_HUMAN ATP-dependent RNA helicase DDX3X OS=Homo sapiens GN=DDX3X PE=1 SV=3;>sp|O00571-2|DDX3X_HUMAN Isoform 2 of ATP-dependent RNA helicase DDX3X OS=Homo sapiens GN=DDX3X	MULTI-MSMS		JACB153_3	MCF7 R10K8	781.76	3	778.09	2331.25	38805	-0.43745	0.21633	-0.22111	778.424	781.761	92.558	34.855	1.033	92.558	92.202	93.235	7.6294e-06		0	0	0	5.3941e-18	2	33872	162.49	162.49	1	45.928	20.534	0
VAPAPAVVK	9	1	0	Unmodified	_VAPAPAVVK_			0	0	P62424;Q5T8U3	P62424	P62424	RPL7A	60S ribosomal protein L7a	>sp|P62424|RL7A_HUMAN 60S ribosomal protein L7a OS=Homo sapiens GN=RPL7A PE=1 SV=2;>tr|Q5T8U3|Q5T8U3_HUMAN 60S ribosomal protein L7a (Fragment) OS=Homo sapiens GN=RPL7A PE=1 SV=1	MULTI-MSMS		JACB153_3	MCF7 R10K8	430.28	2	426.271	850.528	53857.4	-0.29093	0.19306	-0.097863	426.271	430.278	20.93	10.976	0.39301	20.93	20.727	21.12	0		0	0	0	0.0044444	1	5705	82.279	49.386	1	46.041	14.583	0
IITITGTQDQIQNAQYLLQNSVK	23	1	0	Unmodified	_IITITGTQDQIQNAQYLLQNSVK_			0	0	P61978-3;Q5T6W5;P61978-2;P61978	P61978-3;P61978-2	P61978-2	HNRNPK	Heterogeneous nuclear ribonucleoprotein K	>sp|P61978-3|HNRPK_HUMAN Isoform 3 of Heterogeneous nuclear ribonucleoprotein K OS=Homo sapiens GN=HNRNPK;>tr|Q5T6W5|Q5T6W5_HUMAN Heterogeneous nuclear ribonucleoprotein K OS=Homo sapiens GN=HNRNPK PE=1 SV=1;>sp|P61978-2|HNRPK_HUMAN Isoform 2 of Heterogene	MULTI-MSMS		JACB153_3	MCF7 R10K8	866.81	3	863.801	2588.38	37373.9	-0.65537	-0.11165	-0.76702	864.47	866.807	66.907	26.302	0.6352	66.907	66.617	67.252	0		0	0	0	1.2939e-11	1	24741	129.32	129.32	1	46.26	10.7	0
AIGAVPLIQGEYMIPCEK	18	1	0	Unmodified	_AIGAVPLIQGEYMIPCEK_			0	0	P07339;H7C469;H7C1V0	P07339	P07339	CTSD	Cathepsin D;Cathepsin D light chain;Cathepsin D heavy chain	>sp|P07339|CATD_HUMAN Cathepsin D OS=Homo sapiens GN=CTSD PE=1 SV=1;>tr|H7C469|H7C469_HUMAN Uncharacterized protein (Fragment) OS=Homo sapiens PE=3 SV=1;>tr|H7C1V0|H7C1V0_HUMAN Cathepsin D light chain (Fragment) OS=Homo sapiens GN=CTSD PE=1 SV=1	MULTI-MSMS		JACB153_3	MCF7 R10K8	999.52	2	995.013	1988.01	35292	-0.5911	-0.33635	-0.92744	995.013	999.522	62.884	24.958	0.59	62.884	62.637	63.227	3.8147e-06		0	0	0	1.6789e-10	2	23271	127.83	127.83	1	46.277	12.005	0
ASLENSLR	8	0	1	Unmodified	_ASLENSLR_			0	0	P05783;F8VZY9;CON__H-INV:HIT000015463	P05783	P05783	KRT18	Keratin, type I cytoskeletal 18	>sp|P05783|K1C18_HUMAN Keratin, type I cytoskeletal 18 OS=Homo sapiens GN=KRT18 PE=1 SV=2;>tr|F8VZY9|F8VZY9_HUMAN Keratin, type I cytoskeletal 18 OS=Homo sapiens GN=KRT18 PE=1 SV=1;>H-INV:HIT000015463 Tax_Id=9606 Gene_Symbol=PTPN14 Similar to Keratin 18	MULTI-MSMS		JACB153_3	MCF7 R10K8	450.24	2	445.241	888.466	51589.6	-0.20089	-1.9253	-2.1262	445.239	450.244	23.064	11.687	0.77262	23.064	22.819	23.592	0		0	0	0	0.0014989	2	6583	133.86	47.03	1	47.099	11.252	0
LFQECCPHSTDR	12	0	1	Unmodified	_LFQECCPHSTDR_			0	0	P61978-3;Q5T6W5;Q5T6W2;P61978-2;P61978;Q5T6W1	P61978-3;P61978-2	P61978-2	HNRNPK	Heterogeneous nuclear ribonucleoprotein K	>sp|P61978-3|HNRPK_HUMAN Isoform 3 of Heterogeneous nuclear ribonucleoprotein K OS=Homo sapiens GN=HNRNPK;>tr|Q5T6W5|Q5T6W5_HUMAN Heterogeneous nuclear ribonucleoprotein K OS=Homo sapiens GN=HNRNPK PE=1 SV=1;>tr|Q5T6W2|Q5T6W2_HUMAN Heterogeneous nuclear ri	MULTI-MSMS		JACB153_3	MCF7 R10K8	520.56	3	517.222	1548.64	47982.4	0.40567	-0.51134	-0.10567	517.223	520.558	19.447	10.482	0.58133	19.447	19.131	19.712	1.9073e-06		0	0	0	0.00025035	1	5103	107.85	105.21	1	47.422	13.268	0
DETNYGIPQR	10	0	1	Unmodified	_DETNYGIPQR_			0	0	P63244;D6RAC2;D6REE5;D6RHH4;D6R9L0;D6R9Z1;D6RFX4;D6RFZ9;D6RBD0;E9PD14;D6RAU2;D6R909;D6RGK8	P63244	P63244	GNB2L1	Guanine nucleotide-binding protein subunit beta-2-like 1	>sp|P63244|GBLP_HUMAN Guanine nucleotide-binding protein subunit beta-2-like 1 OS=Homo sapiens GN=GNB2L1 PE=1 SV=3;>tr|D6RAC2|D6RAC2_HUMAN Guanine nucleotide-binding protein subunit beta-2-like 1 OS=Homo sapiens GN=GNB2L1 PE=1 SV=1;>tr|D6REE5|D6REE5_HUMAN	MULTI-MSMS		JACB153_3	MCF7 R10K8	601.79	2	596.783	1191.55	44702.6	-0.13761	-0.05761	-0.19522	596.783	601.787	29.75	13.917	0.49368	29.75	29.533	30.026	1.9073e-06		0	0	0	0.00022635	1	9552	148.56	148.56	1	47.821	15.525	0
SFLLDLLNATGK	12	1	0	Unmodified	_SFLLDLLNATGK_			0	0	O00571;O00571-2	O00571	O00571	DDX3X	ATP-dependent RNA helicase DDX3X	>sp|O00571|DDX3X_HUMAN ATP-dependent RNA helicase DDX3X OS=Homo sapiens GN=DDX3X PE=1 SV=3;>sp|O00571-2|DDX3X_HUMAN Isoform 2 of ATP-dependent RNA helicase DDX3X OS=Homo sapiens GN=DDX3X	MULTI-MSMS		JACB153_3	MCF7 R10K8	650.37	2	646.366	1290.72	43349.2	-0.14154	0.083714	-0.057827	646.367	650.373	76.31	29.435	0.54813	76.31	76.03	76.578	0		0	0	0	1.2055e-06	1	28125	177.04	177.04	1	48.079	15.532	0
SGSMDPSGAHPSVR	14	0	1	Unmodified	_SGSMDPSGAHPSVR_			0	0	Q07666;Q07666-2;Q07666-3	Q07666	Q07666	KHDRBS1	KH domain-containing, RNA-binding, signal transduction-associated protein 1	>sp|Q07666|KHDR1_HUMAN KH domain-containing, RNA-binding, signal transduction-associated protein 1 OS=Homo sapiens GN=KHDRBS1 PE=1 SV=1;>sp|Q07666-2|KHDR1_HUMAN Isoform 2 of KH domain-containing, RNA-binding, signal transduction-associated protein 1 OS=Hom	MULTI-MSMS		JACB153_3	MCF7 R10K8	465.55	3	462.214	1383.62	51411.7	-0.15911	-0.075612	-0.23473	462.214	465.55	16.789	9.5999	0.36874	16.789	16.602	16.971	0		0	0	0	0.0018475	1	4110	85.457	83.445	1	48.167	17.637	0
VSTLPAITLK	10	1	0	Unmodified	_VSTLPAITLK_			0	0	P07339;H7C469;H7C1V0	P07339	P07339	CTSD	Cathepsin D;Cathepsin D light chain;Cathepsin D heavy chain	>sp|P07339|CATD_HUMAN Cathepsin D OS=Homo sapiens GN=CTSD PE=1 SV=1;>tr|H7C469|H7C469_HUMAN Uncharacterized protein (Fragment) OS=Homo sapiens PE=3 SV=1;>tr|H7C1V0|H7C1V0_HUMAN Cathepsin D light chain (Fragment) OS=Homo sapiens GN=CTSD PE=1 SV=1	MULTI-MSMS		JACB153_3	MCF7 R10K8	525.84	2	521.829	1041.64	48878.5	-0.088482	0.65256	0.56408	521.83	525.836	44.942	18.979	0.66138	44.942	44.672	45.333	0		0	0	0	0.0011462	1	16179	100.88	91.874	1	48.647	11.399	0
LLLPGELAK	9	1	0	Unmodified	_LLLPGELAK_			0	0	B4DR52;U3KQK0;Q5QNW6-2;O60814;P57053;P58876;P62807;Q5QNW6;Q93079;Q99877;Q99879;Q99880;P06899;P23527;P33778;Q16778;Q8N257;Q96A08	B4DR52	B4DR52	HIST2H2BF;HIST1H2BK;H2BFS;HIST1H2BD;HIST1H2BC;HIST1H2BH;HIST1H2BN;HIST1H2BM;HIST1H2BL;HIST1H2BJ;HIST1H2BO;HIST1H2BB;HIST2H2BE;HIST3H2BB;HIST1H2BA	Histone H2B;Histone H2B type 1-K;Histone H2B type F-S;Histone H2B type 1-D;Histone H2B type 1-C/E/F/G/I;Histone H2B type 2-F;Histone H2B type 1-H;Histone H2B type 1-N;Histone H2B type 1-M;Histone H2B type 1-L;Histone H2B type 1-J;Histone H2B type 1-O;Histone H2B type 1-B;Histone H2B type 2-E;Histone H2B type 3-B;Histone H2B type 1-A	>tr|B4DR52|B4DR52_HUMAN Histone H2B OS=Homo sapiens GN=HIST2H2BF PE=1 SV=1;>tr|U3KQK0|U3KQK0_HUMAN Histone H2B OS=Homo sapiens GN=HIST1H2BN PE=1 SV=1;>sp|Q5QNW6-2|H2B2F_HUMAN Isoform 2 of Histone H2B type 2-F OS=Homo sapiens GN=HIST2H2BF;>sp|O60814|H2B1K_H	MULTI-MSMS		JACB153_3	MCF7 R10K8	481.31	2	477.305	952.596	50399.5	-0.81553	-0.60178	-1.4173	477.305	481.312	45.813	19.272	0.96059	45.813	45.558	46.518	3.8147e-06		0	0	0	0.0097037	1	16555	64.04	3.4504	1	48.94	10.789	0
LAQALHEMR	9	0	1	Unmodified	_LAQALHEMR_			0	0	P20700;E9PBF6	P20700	P20700	LMNB1	Lamin-B1	>sp|P20700|LMNB1_HUMAN Lamin-B1 OS=Homo sapiens GN=LMNB1 PE=1 SV=2;>tr|E9PBF6|E9PBF6_HUMAN Lamin-B1 OS=Homo sapiens GN=LMNB1 PE=1 SV=1	MULTI-MSMS		JACB153_3	MCF7 R10K8	360.19	3	356.859	1067.55	58193.2	-0.18713	-0.44665	-0.63377	356.858	360.195	18.393	10.126	0.46817	18.393	18.24	18.708	1.9073e-06		0	0	0	0.0094729	1	4721	64.841	45.737	1	49.16	20.717	0
HLYTLDGGDIINALCFSPNR	20	0	1	Unmodified	_HLYTLDGGDIINALCFSPNR_			0	0	P63244;J3KPE3;D6RAC2;H0Y8W2;H0YAF8;D6REE5;H0YAM7;D6R9L0;D6R9Z1;H0Y8R5;D6RF23	P63244	P63244	GNB2L1	Guanine nucleotide-binding protein subunit beta-2-like 1	>sp|P63244|GBLP_HUMAN Guanine nucleotide-binding protein subunit beta-2-like 1 OS=Homo sapiens GN=GNB2L1 PE=1 SV=3;>tr|J3KPE3|J3KPE3_HUMAN Guanine nucleotide-binding protein subunit beta-2-like 1 OS=Homo sapiens GN=GNB2L1 PE=1 SV=1;>tr|D6RAC2|D6RAC2_HUMAN	MULTI-MSMS		JACB153_3	MCF7 R10K8	763.05	3	759.376	2275.11	39924.1	-0.65675	0.10296	-0.55379	760.045	763.046	66.061	26.023	0.65805	66.061	65.782	66.44	0		0	0	0	1.3864e-21	2	24437	232.15	227.53	1	49.341	16.194	0
AALQELLSK	9	1	0	Unmodified	_AALQELLSK_			0	0	P62851	P62851	P62851	RPS25	40S ribosomal protein S25	>sp|P62851|RS25_HUMAN 40S ribosomal protein S25 OS=Homo sapiens GN=RPS25 PE=1 SV=1	MULTI-MSMS		JACB153_3	MCF7 R10K8	490.8	2	486.79	971.565	49751.9	-1.1199	0.61336	-0.50657	486.791	490.797	42.302	18.1	0.62025	42.302	42.051	42.671	0		0	0	0	0.00076032	1	15052	116.3	98.137	1	49.654	12.717	0
INEILSNALK	10	1	0	Unmodified	_INEILSNALK_			0	0	P52272;P52272-2;M0R019	P52272	P52272	HNRNPM	Heterogeneous nuclear ribonucleoprotein M	>sp|P52272|HNRPM_HUMAN Heterogeneous nuclear ribonucleoprotein M OS=Homo sapiens GN=HNRNPM PE=1 SV=3;>sp|P52272-2|HNRPM_HUMAN Isoform 2 of Heterogeneous nuclear ribonucleoprotein M OS=Homo sapiens GN=HNRNPM;>tr|M0R019|M0R019_HUMAN Heterogeneous nuclear rib	MULTI-MSMS		JACB153_3	MCF7 R10K8	561.83	2	557.827	1113.64	47223.9	-0.47021	-0.063245	-0.53346	557.827	561.834	41.798	17.935	0.39653	41.798	41.602	41.999	0		0	0	0	0.00092606	1	14865	117.52	85.302	1	49.732	14.406	0
GFSLEELR	8	0	1	Unmodified	_GFSLEELR_			0	0	P26373;P26373-2;J3QSB4	P26373	P26373	RPL13	60S ribosomal protein L13	>sp|P26373|RL13_HUMAN 60S ribosomal protein L13 OS=Homo sapiens GN=RPL13 PE=1 SV=4;>sp|P26373-2|RL13_HUMAN Isoform 2 of 60S ribosomal protein L13 OS=Homo sapiens GN=RPL13;>tr|J3QSB4|J3QSB4_HUMAN 60S ribosomal protein L13 (Fragment) OS=Homo sapiens GN=RPL13	MULTI-MSMS		JACB153_3	MCF7 R10K8	480.75	2	475.751	949.487	51010	-0.75767	-0.5954	-1.3531	475.749	480.755	46.036	19.347	0.49029	46.036	45.804	46.294	0		0	0	0	0.0065074	1	16682	81.548	64.772	1	49.911	16.049	0
SNMDNMFESYINNLR	15	0	1	Unmodified	_SNMDNMFESYINNLR_			0	0	P05787-2;CON__P05787;P05787;F8VUG2;CON__H-INV:HIT000292931;F8W1U3;F8VP67;F8VRG4	P05787-2	P05787-2	KRT8	Keratin, type II cytoskeletal 8	>sp|P05787-2|K2C8_HUMAN Isoform 2 of Keratin, type II cytoskeletal 8 OS=Homo sapiens GN=KRT8;>P05787 SWISS-PROT:P05787 Tax_Id=9606 Gene_Symbol=KRT8 Keratin, type II cytoskeletal 8;>sp|P05787|K2C8_HUMAN Keratin, type II cytoskeletal 8 OS=Homo sapiens GN=KRT	MULTI-MSMS		JACB153_3	MCF7 R10K8	929.91	2	924.406	1846.8	36606.4	-0.6606	-0.64778	-1.3084	924.406	929.41	69.642	27.21	0.61007	69.642	69.333	69.943	0		0	0	0	1.6598e-12	2	25835	211.51	211.51	1	49.972	15.688	0
LEGLTDEINFLR	12	0	1	Unmodified	_LEGLTDEINFLR_			0	0	P05787-2;CON__P05787;P05787;F8VUG2;CON__H-INV:HIT000292931;F8W1U3;CON__Q9H552;F8VP67;H0YIB2	P05787-2	P05787-2	KRT8	Keratin, type II cytoskeletal 8	>sp|P05787-2|K2C8_HUMAN Isoform 2 of Keratin, type II cytoskeletal 8 OS=Homo sapiens GN=KRT8;>P05787 SWISS-PROT:P05787 Tax_Id=9606 Gene_Symbol=KRT8 Keratin, type II cytoskeletal 8;>sp|P05787|K2C8_HUMAN Keratin, type II cytoskeletal 8 OS=Homo sapiens GN=KRT	MULTI-MSMS		JACB153_3	MCF7 R10K8	710.38	2	710.378	1418.74	41443.4	-0.12692	-0.40361	-0.53053	710.378	715.382	63.851	25.286	0.74049	63.851	63.593	64.334	0		0	0	0	4.3258e-10	3	23665	212.09	195.15	1	50.077	10.361	0
IMDPNIVGSEHYDVAR	16	0	1	Unmodified	_IMDPNIVGSEHYDVAR_			0	0	P06576;F8VPV9;H0YH81;F8VQY0	P06576	P06576	ATP5B	ATP synthase subunit beta, mitochondrial;ATP synthase subunit beta	>sp|P06576|ATPB_HUMAN ATP synthase subunit beta, mitochondrial OS=Homo sapiens GN=ATP5B PE=1 SV=3;>tr|F8VPV9|F8VPV9_HUMAN ATP synthase subunit beta OS=Homo sapiens GN=ATP5B PE=1 SV=1;>tr|H0YH81|H0YH81_HUMAN ATP synthase subunit beta (Fragment) OS=Homo sapi	MULTI-MSMS		JACB153_3	MCF7 R10K8	609.63	3	605.961	1814.86	43827.3	-0.77878	0.12555	-0.65323	605.961	609.298	38.658	16.885	0.79396	38.658	38.347	39.141	0		0	0	0	6.2984e-08	1	13470	145.55	120.37	1	50.265	15.067	0
LLLPWLEAR	9	0	1	Unmodified	_LLLPWLEAR_			0	0	Q00610;Q00610-2	Q00610	Q00610	CLTC	Clathrin heavy chain 1	>sp|Q00610|CLH1_HUMAN Clathrin heavy chain 1 OS=Homo sapiens GN=CLTC PE=1 SV=5;>sp|Q00610-2|CLH1_HUMAN Isoform 2 of Clathrin heavy chain 1 OS=Homo sapiens GN=CLTC	MULTI-MSMS		JACB153_3	MCF7 R10K8	560.84	2	555.837	1109.66	47331.6	0.36145	-0.010148	0.3513	555.837	560.841	69.022	27.004	0.79314	69.022	68.721	69.514	0		0	0	0	0.00090042	2	25496	107.15	107.15	1	50.277	14.423	0
AQILPIR	7	0	1	Acetyl (Protein N-term)	_(ac)AQILPIR_			1	0	Q00610;Q00610-2;J3KS13;J3KSQ2;J3QL20	Q00610	Q00610	CLTC	Clathrin heavy chain 1	>sp|Q00610|CLH1_HUMAN Clathrin heavy chain 1 OS=Homo sapiens GN=CLTC PE=1 SV=5;>sp|Q00610-2|CLH1_HUMAN Isoform 2 of Clathrin heavy chain 1 OS=Homo sapiens GN=CLTC;>tr|J3KS13|J3KS13_HUMAN Clathrin heavy chain 1 OS=Homo sapiens GN=CLTC PE=1 SV=1;>tr|J3KSQ2|J	MULTI-MSMS		JACB153_3	MCF7 R10K8	431.77	2	426.769	851.523	53350.5	-0.12618	-0.055226	-0.18141	426.768	431.773	60.083	24.027	0.48401	60.083	59.841	60.325	0		0	0	0	0.0088787	1	22244	81.635	57.48	1	50.324	17.779	0
HWGGNVLGPK	10	1	0	Unmodified	_HWGGNVLGPK_			0	0	P62424;Q5T8U2	P62424	P62424	RPL7A	60S ribosomal protein L7a	>sp|P62424|RL7A_HUMAN 60S ribosomal protein L7a OS=Homo sapiens GN=RPL7A PE=1 SV=2;>tr|Q5T8U2|Q5T8U2_HUMAN 60S ribosomal protein L7a OS=Homo sapiens GN=RPL7A PE=1 SV=1	MULTI-MSMS		JACB153_3	MCF7 R10K8	536.79	2	532.785	1063.56	48300.9	-0.31745	0.41748	0.10003	532.785	536.793	23.772	11.925	0.44527	23.772	23.609	24.055	0		0	0	0	0.0008419	1	6908	123.88	123.88	1	50.41	13.738	0
IGLFGGAGVGK	11	1	0	Unmodified	_IGLFGGAGVGK_			0	0	P06576;F8VPV9;H0YH81;F8W079	P06576	P06576	ATP5B	ATP synthase subunit beta, mitochondrial;ATP synthase subunit beta	>sp|P06576|ATPB_HUMAN ATP synthase subunit beta, mitochondrial OS=Homo sapiens GN=ATP5B PE=1 SV=3;>tr|F8VPV9|F8VPV9_HUMAN ATP synthase subunit beta OS=Homo sapiens GN=ATP5B PE=1 SV=1;>tr|H0YH81|H0YH81_HUMAN ATP synthase subunit beta (Fragment) OS=Homo sapi	MULTI-MSMS		JACB153_3	MCF7 R10K8	492.29	2	488.285	974.555	49881.5	0.3389	-0.0622	0.2767	488.285	492.292	43.067	18.359	0.41634	43.067	42.86	43.276	3.8147e-06		0	0	0	0.0088649	1	15466	74.841	50.065	1	50.436	13.196	0
LQMEAPHIIVGTPGR	15	0	1	Unmodified	_LQMEAPHIIVGTPGR_			0	0	P60842;P60842-2;J3KT12;J3QS69;J3KTB5;J3QL43;J3QR64;J3KSZ0;J3KS25;J3QLN6;J3QKZ9	P60842	P60842	EIF4A1	Eukaryotic initiation factor 4A-I	>sp|P60842|IF4A1_HUMAN Eukaryotic initiation factor 4A-I OS=Homo sapiens GN=EIF4A1 PE=1 SV=1;>sp|P60842-2|IF4A1_HUMAN Isoform 2 of Eukaryotic initiation factor 4A-I OS=Homo sapiens GN=EIF4A1;>tr|J3KT12|J3KT12_HUMAN Eukaryotic initiation factor 4A-I OS=Homo	MULTI-MSMS		JACB153_3	MCF7 R10K8	543.63	3	540.296	1617.87	47229.2	-0.62618	0.083539	-0.54264	540.296	543.632	41.764	17.925	0.63593	41.764	41.401	42.037	0		0	0	0	0.0001746	1	14844	92.773	92.773	1	50.487	14.471	0
DLPLLLFR	8	0	1	Unmodified	_DLPLLLFR_			0	0	O43175;Q5SZU1	O43175	O43175	PHGDH	D-3-phosphoglycerate dehydrogenase	>sp|O43175|SERA_HUMAN D-3-phosphoglycerate dehydrogenase OS=Homo sapiens GN=PHGDH PE=1 SV=4;>tr|Q5SZU1|Q5SZU1_HUMAN D-3-phosphoglycerate dehydrogenase OS=Homo sapiens GN=PHGDH PE=1 SV=1	MULTI-MSMS		JACB153_3	MCF7 R10K8	498.31	2	493.805	985.596	49471.8	0.42556	0.58378	1.0093	493.806	498.809	75.77	29.259	0.83456	75.77	75.395	76.229	0		0	0	0	0.10806	1	27901	39.148	15.193	1	51.274	17.404	0
EFPGFLENQKDPLAVDK	17	2	0	Unmodified	_EFPGFLENQKDPLAVDK_			0	0	P60903	P60903	P60903	S100A10	Protein S100-A10	>sp|P60903|S10AA_HUMAN Protein S100-A10 OS=Homo sapiens GN=S100A10 PE=1 SV=2	MULTI-MSMS		JACB153_3	MCF7 R10K8	655.34	3	649.667	1945.98	42352.2	-0.54337	0.50459	-0.038782	650.334	655.01	52.968	21.651	1.1114	52.968	52.437	53.548	0		0	0	0	4.8571e-06	3	19491	100.35	100.35	1	51.34	88.439	0
SKPHSEAGTAFIQTQQLHAAMADTFLEHMCR	31	1	1	Acetyl (Protein N-term)	_(ac)SKPHSEAGTAFIQTQQLHAAMADTFLEHMCR_			1	0	P14618;H3BQ34;H3BTJ2;H3BUW1;H3BT25;H3BU13;H3BQZ3;H3BN34;P14618-2;H3BTN5;Q504U3	P14618;P14618-2	P14618	PKM2	Pyruvate kinase isozymes M1/M2;Pyruvate kinase	>sp|P14618|KPYM_HUMAN Pyruvate kinase PKM OS=Homo sapiens GN=PKM PE=1 SV=4;>tr|H3BQ34|H3BQ34_HUMAN Pyruvate kinase OS=Homo sapiens GN=PKM PE=1 SV=1;>tr|H3BTJ2|H3BTJ2_HUMAN Pyruvate kinase PKM (Fragment) OS=Homo sapiens GN=PKM PE=1 SV=1;>tr|H3BUW1|H3BUW1_HU	MULTI-MSMS		JACB153_3	MCF7 R10K8	715.94	5	711.937	3554.65	40929.4	-0.45223	0.32924	-0.12299	712.339	715.743	54.752	22.249	1.0234	54.752	54.237	55.26	0		0	0	0	4.2123e-36	2	20233	234.53	234.53	1	51.45	64.708	0
IAIYELLFK	9	1	0	Unmodified	_IAIYELLFK_			0	0	P46783;S4R435;F6U211	P46783	P46783	RPS10	40S ribosomal protein S10	>sp|P46783|RS10_HUMAN 40S ribosomal protein S10 OS=Homo sapiens GN=RPS10 PE=1 SV=1;>tr|S4R435|S4R435_HUMAN Protein RPS10-NUDT3 (Fragment) OS=Homo sapiens GN=RPS10-NUDT3 PE=3 SV=1;>tr|F6U211|F6U211_HUMAN 40S ribosomal protein S10 OS=Homo sapiens GN=RPS10 PE	MULTI-MSMS		JACB153_3	MCF7 R10K8	559.34	2	555.334	1108.65	46815.8	0.7216	-0.51932	0.20227	555.335	559.341	72.305	28.101	0.9399	72.305	72.047	72.987	0		0	0	0	0.0016263	2	26676	92.051	92.051	1	51.879	14.663	0
APFDLFENR	9	0	1	Unmodified	_APFDLFENR_			0	0	P07900-2;P07900;Q86U12	P07900-2	P07900-2	HSP90AA1	Heat shock protein HSP 90-alpha	>sp|P07900-2|HS90A_HUMAN Isoform 2 of Heat shock protein HSP 90-alpha OS=Homo sapiens GN=HSP90AA1;>sp|P07900|HS90A_HUMAN Heat shock protein HSP 90-alpha OS=Homo sapiens GN=HSP90AA1 PE=1 SV=5;>tr|Q86U12|Q86U12_HUMAN Full-length cDNA clone CS0CAP007YF18 of T	MULTI-MSMS		JACB153_3	MCF7 R10K8	559.78	2	554.775	1107.53	47153.3	-0.0040906	0.4069	0.4028	555.28	559.779	54.477	22.154	0.68353	54.477	54.147	54.83	0		0	0	0	0.0002288	1	20075	145.72	145.72	1	51.909	15.502	0
LYAYEPADTALLLDNMK	17	1	0	Unmodified	_LYAYEPADTALLLDNMK_			0	0	Q4JM47;O95994	Q4JM47	Q4JM47	AGR2	Anterior gradient protein 2 homolog	>tr|Q4JM47|Q4JM47_HUMAN AGR2 OS=Homo sapiens GN=AGR2 PE=4 SV=1;>sp|O95994|AGR2_HUMAN Anterior gradient protein 2 homolog OS=Homo sapiens GN=AGR2 PE=1 SV=1	MULTI-MSMS		JACB153_3	MCF7 R10K8	974.99	2	970.987	1939.96	35351.4	-0.73331	-0.16846	-0.90177	970.987	974.994	66.656	26.215	0.6644	66.656	66.392	67.056	0		0	0	0	2.697e-07	2	24646	122.1	122.1	1	52.282	13.201	0
DVDEAYMNK	9	1	0	Unmodified	_DVDEAYMNK_			0	0	P05787-2;CON__P05787;P05787;F8VUG2;CON__H-INV:HIT000292931;F8W1U3;CON__Q9H552;F8VP67;H0YIB2	P05787-2	P05787-2	KRT8	Keratin, type II cytoskeletal 8	>sp|P05787-2|K2C8_HUMAN Isoform 2 of Keratin, type II cytoskeletal 8 OS=Homo sapiens GN=KRT8;>P05787 SWISS-PROT:P05787 Tax_Id=9606 Gene_Symbol=KRT8 Keratin, type II cytoskeletal 8;>sp|P05787|K2C8_HUMAN Keratin, type II cytoskeletal 8 OS=Homo sapiens GN=KRT	MULTI-MSMS		JACB153_3	MCF7 R10K8	546.74	2	542.734	1083.45	47441.9	-0.30808	0.6844	0.37632	542.735	546.742	25.291	12.432	0.46589	25.291	25.074	25.539	0		0	0	0	0.00039433	1	7568	137.13	137.13	1	52.38	13.847	0
LLTSFLPAQLLR	12	0	1	Unmodified	_LLTSFLPAQLLR_			0	0	P08195-4;J3KPF3;P08195;F5GZS6;P08195-3;P08195-2;H0YFX4	P08195-4	P08195-4	SLC3A2	4F2 cell-surface antigen heavy chain	>sp|P08195-4|4F2_HUMAN Isoform 4 of 4F2 cell-surface antigen heavy chain OS=Homo sapiens GN=SLC3A2;>tr|J3KPF3|J3KPF3_HUMAN 4F2 cell-surface antigen heavy chain OS=Homo sapiens GN=SLC3A2 PE=1 SV=1;>sp|P08195|4F2_HUMAN 4F2 cell-surface antigen heavy chain OS	MULTI-MSMS		JACB153_3	MCF7 R10K8	691.43	2	686.422	1370.83	42173.8	-0.00066315	-0.20292	-0.20359	686.421	691.426	71.761	27.922	0.58266	71.761	71.523	72.106	0		0	0	0	0.00025035	1	26507	107.85	79.041	1	52.633	16.905	0
SNMDNMFESYINNLR	15	0	1	Unmodified	_SNMDNMFESYINNLR_			0	0	P05787-2;CON__P05787;P05787;F8VUG2;CON__H-INV:HIT000292931;F8W1U3;F8VP67;F8VRG4	P05787-2	P05787-2	KRT8	Keratin, type II cytoskeletal 8	>sp|P05787-2|K2C8_HUMAN Isoform 2 of Keratin, type II cytoskeletal 8 OS=Homo sapiens GN=KRT8;>P05787 SWISS-PROT:P05787 Tax_Id=9606 Gene_Symbol=KRT8 Keratin, type II cytoskeletal 8;>sp|P05787|K2C8_HUMAN Keratin, type II cytoskeletal 8 OS=Homo sapiens GN=KRT	MULTI-MSMS		JACB153_3	MCF7 R10K8	619.94	3	616.607	1846.8	44316.4	0.086635	-0.73674	-0.65011	616.606	619.943	69.639	27.21	0.71692	69.639	69.285	70.002	-7.6294e-06		0	0	0	7.4826e-08	2	25839	150.11	150.11	1	53.12	18.088	0
IMFVDPSLTVR	11	0	1	Unmodified	_IMFVDPSLTVR_			0	0	Q4JM47;O95994;B5MC07;H7C3Z9;Q8TD06;B5MC62;H7C040	Q4JM47;Q8TD06	Q4JM47	AGR2;AGR3	Anterior gradient protein 2 homolog;Anterior gradient protein 3 homolog	>tr|Q4JM47|Q4JM47_HUMAN AGR2 OS=Homo sapiens GN=AGR2 PE=4 SV=1;>sp|O95994|AGR2_HUMAN Anterior gradient protein 2 homolog OS=Homo sapiens GN=AGR2 PE=1 SV=1;>tr|B5MC07|B5MC07_HUMAN Anterior gradient protein 2 homolog OS=Homo sapiens GN=AGR2 PE=2 SV=1;>tr|H7C	MULTI-MSMS		JACB153_3	MCF7 R10K8	644.35	2	639.35	1276.68	42901.3	-0.76178	0.13139	-0.6304	639.35	644.354	57.457	23.154	0.72491	57.457	57.197	57.922	0		0	0	0	0.00074683	1	21251	97.163	97.163	1	53.587	12.504	0
AITIAGIPQSIIECVK	16	1	0	Unmodified	_AITIAGIPQSIIECVK_			0	0	Q15366-6;Q15366;H3BRU6;B4DLC0;B4DXP5;F8VXH9;Q15366-3;Q15366-2;Q15366-4;Q15366-5;F8VZX2;Q15366-7;F8VRH0	Q15366-6;Q15366-3	Q15366-3	PCBP2	Poly(rC)-binding protein 2	>sp|Q15366-6|PCBP2_HUMAN Isoform 6 of Poly(rC)-binding protein 2 OS=Homo sapiens GN=PCBP2;>sp|Q15366|PCBP2_HUMAN Poly(rC)-binding protein 2 OS=Homo sapiens GN=PCBP2 PE=1 SV=1;>tr|H3BRU6|H3BRU6_HUMAN Poly(rC)-binding protein 2 (Fragment) OS=Homo sapiens GN=	MULTI-MSMS		JACB153_3	MCF7 R10K8	860.99	2	856.984	1711.95	37949.8	-0.62882	-0.15122	-0.78004	856.983	860.991	67.22	26.404	0.51817	67.22	66.959	67.477	0		0	0	0	8.7871e-08	2	24870	140.84	140.84	1	53.692	15.417	0
AFMTADLPNELIELLEK	17	1	0	Unmodified	_AFMTADLPNELIELLEK_			0	0	Q00610;Q00610-2;P53675;P53675-2;J3KR87	Q00610	Q00610	CLTC;CLTCL1	Clathrin heavy chain 1;Clathrin heavy chain 2	>sp|Q00610|CLH1_HUMAN Clathrin heavy chain 1 OS=Homo sapiens GN=CLTC PE=1 SV=5;>sp|Q00610-2|CLH1_HUMAN Isoform 2 of Clathrin heavy chain 1 OS=Homo sapiens GN=CLTC;>sp|P53675|CLH2_HUMAN Clathrin heavy chain 2 OS=Homo sapiens GN=CLTCL1 PE=1 SV=2;>sp|P53675-2	MULTI-MSMS		JACB153_3	MCF7 R10K8	652.68	3	649.676	1946.01	43459.4	-0.22714	-0.14611	-0.37325	649.676	652.348	93.633	39.092	0.58907	93.633	93.339	93.928	0		0	0	0	0.0010893	2	34143	78.326	78.326	1	54.104	24.283	0
VIQCFAETGQVQK	13	1	0	Unmodified	_VIQCFAETGQVQK_			0	0	Q00610;Q00610-2	Q00610	Q00610	CLTC	Clathrin heavy chain 1	>sp|Q00610|CLH1_HUMAN Clathrin heavy chain 1 OS=Homo sapiens GN=CLTC PE=1 SV=5;>sp|Q00610-2|CLH1_HUMAN Isoform 2 of Clathrin heavy chain 1 OS=Homo sapiens GN=CLTC	MULTI-MSMS		JACB153_3	MCF7 R10K8	758.39	2	754.382	1506.75	40288.6	-0.75059	0.054916	-0.69568	754.383	758.39	30.097	14.033	0.45051	30.097	29.922	30.373	0		0	0	0	8.6787e-10	1	9717	193.28	193.28	1	54.141	15.599	0
GDGPICLVLAPTR	13	0	1	Unmodified	_GDGPICLVLAPTR_			0	0	H3BLZ8;Q92841;C9JMU5;Q92841-2;Q92841-3;Q92841-1;J3KTA4;P17844;B4DLW8;J3QRQ7;J3KRZ1	H3BLZ8;J3KTA4	J3KTA4	DDX17;DDX5	Probable ATP-dependent RNA helicase DDX17;Probable ATP-dependent RNA helicase DDX5	>tr|H3BLZ8|H3BLZ8_HUMAN Probable ATP-dependent RNA helicase DDX17 OS=Homo sapiens GN=DDX17 PE=1 SV=1;>sp|Q92841|DDX17_HUMAN Probable ATP-dependent RNA helicase DDX17 OS=Homo sapiens GN=DDX17 PE=1 SV=2;>tr|C9JMU5|C9JMU5_HUMAN Probable ATP-dependent RNA heli	MULTI-MSMS		JACB153_3	MCF7 R10K8	689.87	2	684.869	1367.72	41994	-0.52084	0.5815	0.060664	685.37	689.874	54.701	22.23	0.4683	54.701	54.448	54.917	0		0	0	0	0.00010588	1	20159	116.63	116.63	1	54.268	18.217	0
SVDPDSPAEASGLR	14	0	1	Unmodified	_SVDPDSPAEASGLR_			0	0	O14745;B3KY21	O14745	O14745	SLC9A3R1	Na(+)/H(+) exchange regulatory cofactor NHE-RF1	>sp|O14745|NHRF1_HUMAN Na(+)/H(+) exchange regulatory cofactor NHE-RF1 OS=Homo sapiens GN=SLC9A3R1 PE=1 SV=4;>tr|B3KY21|B3KY21_HUMAN Na(+)/H(+) exchange regulatory cofactor NHE-RF1 OS=Homo sapiens GN=SLC9A3R1 PE=1 SV=1	MULTI-MSMS		JACB153_3	MCF7 R10K8	705.84	2	700.836	1399.66	41520.4	0.013257	-0.10635	-0.09309	701.337	705.841	28.85	13.62	0.49163	28.85	28.623	29.115	0		0	0	0	2.0745e-05	1	9133	123.02	119.68	1	54.82	16.875	0
NLQNLLILTAIK	12	1	0	Unmodified	_NLQNLLILTAIK_			0	0	Q00610;Q00610-2;P53675;P53675-2;J3KR87	Q00610	Q00610	CLTC;CLTCL1	Clathrin heavy chain 1;Clathrin heavy chain 2	>sp|Q00610|CLH1_HUMAN Clathrin heavy chain 1 OS=Homo sapiens GN=CLTC PE=1 SV=5;>sp|Q00610-2|CLH1_HUMAN Isoform 2 of Clathrin heavy chain 1 OS=Homo sapiens GN=CLTC;>sp|P53675|CLH2_HUMAN Clathrin heavy chain 2 OS=Homo sapiens GN=CLTCL1 PE=1 SV=2;>sp|P53675-2	MULTI-MSMS		JACB153_3	MCF7 R10K8	681.43	2	677.427	1352.84	42524.7	-0.2054	-0.14188	-0.34729	677.427	681.434	69.191	27.06	0.51549	69.191	68.953	69.469	0		0	0	0	0.00028974	2	25565	102.62	102.62	1	54.926	16.126	0
GAVDGGLSIPHSTK	14	1	0	Unmodified	_GAVDGGLSIPHSTK_			0	0	P46777;Q5T7N0	P46777	P46777	RPL5	60S ribosomal protein L5	>sp|P46777|RL5_HUMAN 60S ribosomal protein L5 OS=Homo sapiens GN=RPL5 PE=1 SV=3;>tr|Q5T7N0|Q5T7N0_HUMAN 60S ribosomal protein L5 (Fragment) OS=Homo sapiens GN=RPL5 PE=1 SV=2	MULTI-MSMS		JACB153_3	MCF7 R10K8	449.58	3	446.905	1337.69	52366.9	-0.43181	-0.54802	-0.97982	447.239	449.576	26.977	12.991	0.53678	26.977	26.753	27.29	0		0	0	0	7.8264e-05	1	8309	94.09	83.144	1	55.198	14.341	0
ALLELQLEPEELYQTFQR	18	0	1	Unmodified	_ALLELQLEPEELYQTFQR_			0	0	P13639	P13639	P13639	EEF2	Elongation factor 2	>sp|P13639|EF2_HUMAN Elongation factor 2 OS=Homo sapiens GN=EEF2 PE=1 SV=4	MULTI-MSMS		JACB153_3	MCF7 R10K8	744.39	3	740.723	2219.15	40544.4	-0.26112	0.14836	-0.11276	741.058	744.394	78.579	30.192	0.75108	78.579	78.292	79.043	0		0	0	0	1.8971e-16	2	28890	211.78	211.78	1	55.299	15.791	0
ETVSEESNVLCLSK	14	1	0	Unmodified	_ETVSEESNVLCLSK_			0	0	P13639	P13639	P13639	EEF2	Elongation factor 2	>sp|P13639|EF2_HUMAN Elongation factor 2 OS=Homo sapiens GN=EEF2 PE=1 SV=4	MULTI-MSMS		JACB153_3	MCF7 R10K8	801.89	2	797.885	1593.76	38517.5	-0.6254	0.6622	0.036804	798.385	801.893	40.433	17.478	0.69408	40.433	40.22	40.914	0		0	0	0	1.2367e-05	1	14247	133.14	126.93	1	55.453	13.502	0
HLEINPDHPIVETLR	15	0	1	Unmodified	_HLEINPDHPIVETLR_			0	0	P08238	P08238	P08238	HSP90AB1	Heat shock protein HSP 90-beta	>sp|P08238|HS90B_HUMAN Heat shock protein HSP 90-beta OS=Homo sapiens GN=HSP90AB1 PE=1 SV=4	MULTI-MSMS		JACB153_3	MCF7 R10K8	598.32	3	594.988	1781.94	45091.4	0.052412	-0.6753	-0.62289	595.323	598.324	36.663	16.218	0.84309	36.663	36.307	37.15	0		0	0	0	2.9128e-08	1	12603	154.6	154.6	1	55.464	13.727	0
ASGPPVSELITK	12	1	0	Unmodified	_ASGPPVSELITK_			0	0	P16402;P10412;P16403	P16402;P10412;P16403	P16402	HIST1H1D;HIST1H1E;HIST1H1C	Histone H1.3;Histone H1.4;Histone H1.2	>sp|P16402|H13_HUMAN Histone H1.3 OS=Homo sapiens GN=HIST1H1D PE=1 SV=2;>sp|P10412|H14_HUMAN Histone H1.4 OS=Homo sapiens GN=HIST1H1E PE=1 SV=2;>sp|P16403|H12_HUMAN Histone H1.2 OS=Homo sapiens GN=HIST1H1C PE=1 SV=2	MULTI-MSMS		JACB153_3	MCF7 R10K8	603.84	2	599.838	1197.66	45410.5	-0.57026	0.20918	-0.36108	599.837	603.845	38.367	16.792	0.78108	38.367	38.007	38.788	0		0	0	0	0.0051958	2	13469	84.954	62.036	1	55.802	13.24	0
VFDMLNR	7	0	1	Unmodified	_VFDMLNR_			0	0	P60842;P60842-2;J3KT12;J3QS69;J3KTB5;J3QL43;J3QR64;J3KSZ0;J3KS25;J3QLN6;J3QKZ9;Q14240-2;Q14240;E7EQG2;Q9NZE6	P60842;Q14240-2	P60842	EIF4A1;EIF4A2	Eukaryotic initiation factor 4A-I;Eukaryotic initiation factor 4A-II	>sp|P60842|IF4A1_HUMAN Eukaryotic initiation factor 4A-I OS=Homo sapiens GN=EIF4A1 PE=1 SV=1;>sp|P60842-2|IF4A1_HUMAN Isoform 2 of Eukaryotic initiation factor 4A-I OS=Homo sapiens GN=EIF4A1;>tr|J3KT12|J3KT12_HUMAN Eukaryotic initiation factor 4A-I OS=Homo	MULTI-MSMS		JACB153_3	MCF7 R10K8	452.73	2	447.729	893.443	49236.9	-0.25928	-0.58327	-0.84255	447.729	452.733	40.08	17.361	0.66014	40.08	39.736	40.396	0		0	0	0	0.006847	1	14110	110.35	96.84	1	56.214	17.394	0
IITLTGPTNAIFK	13	1	0	Unmodified	_IITLTGPTNAIFK_			0	0	Q15365	Q15365	Q15365	PCBP1	Poly(rC)-binding protein 1	>sp|Q15365|PCBP1_HUMAN Poly(rC)-binding protein 1 OS=Homo sapiens GN=PCBP1 PE=1 SV=2	MULTI-MSMS		JACB153_3	MCF7 R10K8	698.92	2	694.911	1387.81	42675.7	-0.62652	0.14537	-0.48115	694.911	698.918	56.47	22.82	0.6132	56.47	56.253	56.866	0		0	0	0	0.00018843	1	20866	98.902	50.161	1	56.243	13.992	0
DGVVEITGK	9	1	0	Unmodified	_DGVVEITGK_			0	0	P04792	P04792	P04792	HSPB1	Heat shock protein beta-1	>sp|P04792|HSPB1_HUMAN Heat shock protein beta-1 OS=Homo sapiens GN=HSPB1 PE=1 SV=2	MULTI-MSMS		JACB153_3	MCF7 R10K8	463.26	2	459.251	916.487	50844.5	0.29198	-0.8164	-0.52442	459.251	463.257	28.989	13.661	0.81239	28.989	28.535	29.348	1.9073e-06		0	0	0	0.00083456	2	9250	111.46	67.106	1	56.553	11.704	0
GGGGNFGPGPGSNFR	15	0	1	Unmodified	_GGGGNFGPGPGSNFR_			0	0	P22626;P22626-2	P22626	P22626	HNRNPA2B1	Heterogeneous nuclear ribonucleoproteins A2/B1	>sp|P22626|ROA2_HUMAN Heterogeneous nuclear ribonucleoproteins A2/B1 OS=Homo sapiens GN=HNRNPA2B1 PE=1 SV=2;>sp|P22626-2|ROA2_HUMAN Isoform A2 of Heterogeneous nuclear ribonucleoproteins A2/B1 OS=Homo sapiens GN=HNRNPA2B1	MULTI-MSMS		JACB153_3	MCF7 R10K8	694.32	2	689.318	1376.62	42002.4	-0.25631	0.46311	0.20681	689.32	694.323	29.593	13.868	0.67841	29.593	29.348	30.026	1.9073e-06		0	0	0	1.2907e-05	2	9508	110.44	110.44	1	56.611	14.319	0
LSELEAALQR	10	0	1	Unmodified	_LSELEAALQR_			0	0	P05787-2;CON__P05787;P05787;CON__H-INV:HIT000292931;CON__Q9H552;CON__REFSEQ:XP_092267	P05787-2	P05787-2	KRT8	Keratin, type II cytoskeletal 8	>sp|P05787-2|K2C8_HUMAN Isoform 2 of Keratin, type II cytoskeletal 8 OS=Homo sapiens GN=KRT8;>P05787 SWISS-PROT:P05787 Tax_Id=9606 Gene_Symbol=KRT8 Keratin, type II cytoskeletal 8;>sp|P05787|K2C8_HUMAN Keratin, type II cytoskeletal 8 OS=Homo sapiens GN=KRT	MULTI-MSMS		JACB153_3	MCF7 R10K8	565.32	2	565.314	1128.61	46135.7	0.14545	0.58072	0.72617	565.315	570.319	40.445	17.485	1.2138	40.445	40.188	41.401	0		0	0	0	8.2519e-06	4	14271	175.93	130.03	1	57.567	9.0619	0
DLVEAVAHILGIR	13	0	1	Unmodified	_DLVEAVAHILGIR_			0	0	P49327	P49327	P49327	FASN	Fatty acid synthase;[Acyl-carrier-protein] S-acetyltransferase;[Acyl-carrier-protein] S-malonyltransferase;3-oxoacyl-[acyl-carrier-protein] synthase;3-oxoacyl-[acyl-carrier-protein] reductase;3-hydroxypalmitoyl-[acyl-carrier-protein] dehydratase;Enoyl-[acyl-carrier-protein] reductase;Oleoyl-[acyl-carrier-protein] hydrolase	>sp|P49327|FAS_HUMAN Fatty acid synthase OS=Homo sapiens GN=FASN PE=1 SV=3	MULTI-MSMS		JACB153_3	MCF7 R10K8	472.61	3	469.277	1404.81	50679.4	0.20732	-0.63598	-0.42866	469.277	472.613	92.297	34.767	1.0594	92.297	91.944	93.003	0		0	0	0	0.00055927	3	33760	92.925	80.542	1	57.602	19.932	0
GPSWDPFR	8	0	1	Unmodified	_GPSWDPFR_			0	0	P04792;F8WE04	P04792	P04792	HSPB1	Heat shock protein beta-1	>sp|P04792|HSPB1_HUMAN Heat shock protein beta-1 OS=Homo sapiens GN=HSPB1 PE=1 SV=2;>tr|F8WE04|F8WE04_HUMAN Heat shock protein beta-1 OS=Homo sapiens GN=HSPB1 PE=1 SV=1	MULTI-MSMS		JACB153_3	MCF7 R10K8	486.23	2	481.23	960.445	49709.6	-0.20141	-0.77747	-0.97887	481.23	486.234	48.891	20.298	1.5301	48.891	48.53	50.06	0		0	0	0	0.0022813	4	17759	111.04	75.527	1	58.419	11.543	0
LIGEYGLR	8	0	1	Unmodified	_LIGEYGLR_			0	0	P46781;C9JM19;B5MCT8;A8MXK4;F2Z3C0	P46781	P46781	RPS9	40S ribosomal protein S9	>sp|P46781|RS9_HUMAN 40S ribosomal protein S9 OS=Homo sapiens GN=RPS9 PE=1 SV=3;>tr|C9JM19|C9JM19_HUMAN 40S ribosomal protein S9 OS=Homo sapiens GN=RPS9 PE=1 SV=1;>tr|B5MCT8|B5MCT8_HUMAN 40S ribosomal protein S9 OS=Homo sapiens GN=RPS9 PE=1 SV=1;>tr|A8MXK4	MULTI-MSMS		JACB153_3	MCF7 R10K8	465.77	2	460.764	919.513	51333.6	-0.33707	0.2284	-0.10867	460.764	465.768	36.048	16.012	0.58666	36.048	35.859	36.445	0		0	0	0	0.10439	1	12371	40.045	35.261	1	58.681	17.337	0
LIDLHSPSEIVK	12	1	0	Unmodified	_LIDLHSPSEIVK_			0	0	P60866-2;P60866;G3XAN0	P60866-2	P60866-2	RPS20	40S ribosomal protein S20	>sp|P60866-2|RS20_HUMAN Isoform 2 of 40S ribosomal protein S20 OS=Homo sapiens GN=RPS20;>sp|P60866|RS20_HUMAN 40S ribosomal protein S20 OS=Homo sapiens GN=RPS20 PE=1 SV=1;>tr|G3XAN0|G3XAN0_HUMAN 40S ribosomal protein S20 OS=Homo sapiens GN=RPS20 PE=1 SV=1	MULTI-MSMS		JACB153_3	MCF7 R10K8	453.6	3	450.926	1349.76	51997.4	-0.92556	0.073544	-0.85202	450.925	453.597	38.828	16.94	0.67433	38.828	38.504	39.179	0		0	0	0	0.00012986	1	13519	123.84	123.84	1	59.464	15.502	0
VVDLLAPYAK	10	1	0	Unmodified	_VVDLLAPYAK_			0	0	P06576;F8VPV9;H0YH81;F8W079	P06576	P06576	ATP5B	ATP synthase subunit beta, mitochondrial;ATP synthase subunit beta	>sp|P06576|ATPB_HUMAN ATP synthase subunit beta, mitochondrial OS=Homo sapiens GN=ATP5B PE=1 SV=3;>tr|F8VPV9|F8VPV9_HUMAN ATP synthase subunit beta OS=Homo sapiens GN=ATP5B PE=1 SV=1;>tr|H0YH81|H0YH81_HUMAN ATP synthase subunit beta (Fragment) OS=Homo sapi	MULTI-MSMS		JACB153_3	MCF7 R10K8	548.83	2	544.821	1087.63	47726.2	0.21244	0.3014	0.51385	544.823	548.828	49.411	20.475	0.65744	49.411	49.169	49.827	0		0	0	0	0.0023396	2	18021	90.108	90.108	1	59.766	15.88	0
DSQEEEKTEALTSAK	15	2	0	Unmodified	_DSQEEEKTEALTSAK_			0	0	P06396;P06396-3;P06396-4;P06396-2;CON__Q3SX14;Q5T0H8	P06396	P06396	GSN	Gelsolin	>sp|P06396|GELS_HUMAN Gelsolin OS=Homo sapiens GN=GSN PE=1 SV=1;>sp|P06396-3|GELS_HUMAN Isoform 3 of Gelsolin OS=Homo sapiens GN=GSN;>sp|P06396-4|GELS_HUMAN Isoform 4 of Gelsolin OS=Homo sapiens GN=GSN;>sp|P06396-2|GELS_HUMAN Isoform 2 of Gelsolin OS=Homo	MULTI-MSMS		JACB153_3	MCF7 R10K8	561.27	3	555.932	1664.77	46250.2	0.31785	-0.10841	0.20944	556.266	561.275	20.112	10.706	0.34913	20.112	19.952	20.301	1.9073e-06		0	0	0	1.2173e-16	1	5388	223.7	212.38	1	59.83	103.06	0
ATAPQTQHVSPMR	13	0	1	Unmodified	_ATAPQTQHVSPMR_			0	0	P29692-3;E9PQZ1;E9PL71;E9PRY8;P29692-2;P29692;E9PK01;P29692-4;E9PI39;E9PQ49;E9PL12;E9PPR1;E9PK06	P29692-3;E9PRY8	E9PRY8	EEF1D	Elongation factor 1-delta	>sp|P29692-3|EF1D_HUMAN Isoform 3 of Elongation factor 1-delta OS=Homo sapiens GN=EEF1D;>tr|E9PQZ1|E9PQZ1_HUMAN Elongation factor 1-delta OS=Homo sapiens GN=EEF1D PE=1 SV=1;>tr|E9PL71|E9PL71_HUMAN Elongation factor 1-delta (Fragment) OS=Homo sapiens GN=EEF	MULTI-MSMS		JACB153_3	MCF7 R10K8	478.91	3	475.242	1422.7	49453.6	-0.025615	-0.18233	-0.20795	475.576	478.578	16.195	9.4017	0.37641	16.195	16.064	16.44	0		0	0	0	7.3276e-05	1	3896	123.64	114.13	1	59.845	20.388	0
DLVEAVAHILGIR	13	0	1	Unmodified	_DLVEAVAHILGIR_			0	0	P49327	P49327	P49327	FASN	Fatty acid synthase;[Acyl-carrier-protein] S-acetyltransferase;[Acyl-carrier-protein] S-malonyltransferase;3-oxoacyl-[acyl-carrier-protein] synthase;3-oxoacyl-[acyl-carrier-protein] reductase;3-hydroxypalmitoyl-[acyl-carrier-protein] dehydratase;Enoyl-[acyl-carrier-protein] reductase;Oleoyl-[acyl-carrier-protein] hydrolase	>sp|P49327|FAS_HUMAN Fatty acid synthase OS=Homo sapiens GN=FASN PE=1 SV=3	MULTI-MSMS		JACB153_3	MCF7 R10K8	708.42	2	703.412	1404.81	41840.1	-0.085878	-0.1468	-0.23268	703.412	708.416	92.293	34.761	0.80046	92.293	91.955	92.756	0		0	0	0	1.4188e-07	3	33771	185.59	152.4	1	60.087	23.389	0
TGAIVDVPVGEELLGR	16	0	1	Unmodified	_TGAIVDVPVGEELLGR_			0	0	P25705;P25705-2;K7EK77;K7ERX7;K7EJP1;K7EQH4	P25705	P25705	ATP5A1	ATP synthase subunit alpha, mitochondrial	>sp|P25705|ATPA_HUMAN ATP synthase subunit alpha, mitochondrial OS=Homo sapiens GN=ATP5A1 PE=1 SV=1;>sp|P25705-2|ATPA_HUMAN Isoform 2 of ATP synthase subunit alpha, mitochondrial OS=Homo sapiens GN=ATP5A1;>tr|K7EK77|K7EK77_HUMAN ATP synthase subunit alpha,	MULTI-MSMS		JACB153_3	MCF7 R10K8	818.45	2	812.949	1623.88	39101.5	-0.47527	-0.34346	-0.81873	812.949	817.953	61.392	24.468	0.48339	61.392	61.161	61.644	0		0	0	0	8.7871e-08	1	22724	140.84	140.84	1	60.655	17.041	0
YGINTTDIFQTVDLWEGK	18	1	0	Unmodified	_YGINTTDIFQTVDLWEGK_			0	0	P37802;X6RJP6	P37802	P37802	TAGLN2	Transgelin-2	>sp|P37802|TAGL2_HUMAN Transgelin-2 OS=Homo sapiens GN=TAGLN2 PE=1 SV=3;>tr|X6RJP6|X6RJP6_HUMAN Transgelin-2 (Fragment) OS=Homo sapiens GN=TAGLN2 PE=4 SV=1	MULTI-MSMS		JACB153_3	MCF7 R10K8	1055.03	2	1050.52	2099.02	34327.9	-0.34465	0.097875	-0.24678	1051.02	1055.03	80.391	30.797	0.74813	80.391	80.074	80.822	0		0	0	0	5.2544e-13	2	29533	168.89	160.67	1	60.859	18.118	0
YVEPIEDVPCGNIVGLVGVDQFLVK	25	1	0	Unmodified	_YVEPIEDVPCGNIVGLVGVDQFLVK_			0	0	P13639	P13639	P13639	EEF2	Elongation factor 2	>sp|P13639|EF2_HUMAN Elongation factor 2 OS=Homo sapiens GN=EEF2 PE=1 SV=4	MULTI-MSMS		JACB153_3	MCF7 R10K8	923.49	3	920.482	2758.43	36331.2	-0.35127	-0.17	-0.52128	921.151	923.488	83.083	31.694	0.66398	83.083	82.789	83.453	0		0	0	0	8.0609e-07	1	30498	111.11	111.11	1	60.881	16.167	0
LSIVPVR	7	0	1	Unmodified	_LSIVPVR_			0	0	P15880;H0YEN5;E9PMM9;E9PM36;I3L404;E9PPT0	P15880	P15880	RPS2	40S ribosomal protein S2	>sp|P15880|RS2_HUMAN 40S ribosomal protein S2 OS=Homo sapiens GN=RPS2 PE=1 SV=2;>tr|H0YEN5|H0YEN5_HUMAN 40S ribosomal protein S2 (Fragment) OS=Homo sapiens GN=RPS2 PE=1 SV=1;>tr|E9PMM9|E9PMM9_HUMAN 40S ribosomal protein S2 (Fragment) OS=Homo sapiens GN=RPS	MULTI-MSMS		JACB153_3	MCF7 R10K8	397.26	2	392.258	782.501	54193.8	-0.35093	-0.097673	-0.44861	392.258	397.262	35.823	15.941	0.56163	35.823	35.486	36.048	0		0	0	0	0.0073758	1	12251	94.407	52.905	1	60.899	18.932	0
GSYGDLGGPIITTQVTIPK	19	1	0	Unmodified	_GSYGDLGGPIITTQVTIPK_			0	0	P61978-3;Q5T6W5;Q5T6W2;S4R359;P61978-2;P61978	P61978-3;P61978-2	P61978-2	HNRNPK	Heterogeneous nuclear ribonucleoprotein K	>sp|P61978-3|HNRPK_HUMAN Isoform 3 of Heterogeneous nuclear ribonucleoprotein K OS=Homo sapiens GN=HNRNPK;>tr|Q5T6W5|Q5T6W5_HUMAN Heterogeneous nuclear ribonucleoprotein K OS=Homo sapiens GN=HNRNPK PE=1 SV=1;>tr|Q5T6W2|Q5T6W2_HUMAN Heterogeneous nuclear ri	MULTI-MSMS		JACB153_3	MCF7 R10K8	963.53	2	959.02	1916.03	36167.4	-0.78276	-0.28732	-1.0701	959.017	963.528	58.01	23.336	0.47298	58.01	57.809	58.282	0		0	0	0	1.277e-13	2	21463	180.05	180.05	1	61.396	15.089	0
LEGFHTQISK	10	1	0	Unmodified	_LEGFHTQISK_			0	0	Q06323;Q06323-2;H0YNE3;H0YLU2;H0YKK6	Q06323	Q06323	PSME1	Proteasome activator complex subunit 1	>sp|Q06323|PSME1_HUMAN Proteasome activator complex subunit 1 OS=Homo sapiens GN=PSME1 PE=1 SV=1;>sp|Q06323-2|PSME1_HUMAN Isoform 2 of Proteasome activator complex subunit 1 OS=Homo sapiens GN=PSME1;>tr|H0YNE3|H0YNE3_HUMAN Proteasome activator complex subu	MULTI-MSMS		JACB153_3	MCF7 R10K8	389.88	3	387.208	1158.6	56185.7	-0.3742	-0.19554	-0.56974	387.208	389.88	23.513	11.838	0.61854	23.513	23.12	23.738	0		0	0	0	0.0085242	1	6821	69.01	69.01	1	61.535	17.907	0
IEDFLER	7	0	1	Unmodified	_IEDFLER_			0	0	P46781;C9JM19;B5MCT8	P46781	P46781	RPS9	40S ribosomal protein S9	>sp|P46781|RS9_HUMAN 40S ribosomal protein S9 OS=Homo sapiens GN=RPS9 PE=1 SV=3;>tr|C9JM19|C9JM19_HUMAN 40S ribosomal protein S9 OS=Homo sapiens GN=RPS9 PE=1 SV=1;>tr|B5MCT8|B5MCT8_HUMAN 40S ribosomal protein S9 OS=Homo sapiens GN=RPS9 PE=1 SV=1	MULTI-MSMS		JACB153_3	MCF7 R10K8	466.24	2	461.237	920.46	51993.8	-0.739	0.28091	-0.45809	461.237	466.242	38.658	16.885	0.48084	38.658	38.381	38.862	0		0	0	0	0.0071243	1	13463	101.99	44.885	1	62.102	20.359	0
IFAPNHVVAK	10	1	0	Unmodified	_IFAPNHVVAK_			0	0	Q02543;M0R117;M0R1A7;M0R3D6	Q02543	Q02543	RPL18A	60S ribosomal protein L18a	>sp|Q02543|RL18A_HUMAN 60S ribosomal protein L18a OS=Homo sapiens GN=RPL18A PE=1 SV=2;>tr|M0R117|M0R117_HUMAN 60S ribosomal protein L18a OS=Homo sapiens GN=RPL18A PE=1 SV=1;>tr|M0R1A7|M0R1A7_HUMAN 60S ribosomal protein L18a OS=Homo sapiens GN=RPL18A PE=1 S	MULTI-MSMS		JACB153_3	MCF7 R10K8	368.55	3	365.882	1094.62	57520.6	-0.18256	0.63962	0.45705	365.882	368.553	21.862	11.286	0.43043	21.862	21.703	22.134	0		0	0	0	0.0046323	1	6113	82.287	82.287	1	62.314	17.699	0
IWCFGPDGTGPNILTDITK	19	1	0	Unmodified	_IWCFGPDGTGPNILTDITK_			0	0	P13639	P13639	P13639	EEF2	Elongation factor 2	>sp|P13639|EF2_HUMAN Elongation factor 2 OS=Homo sapiens GN=EEF2 PE=1 SV=4	MULTI-MSMS		JACB153_3	MCF7 R10K8	1057.03	2	1053.02	2104.03	34383.8	-0.24526	-0.19813	-0.44338	1053.52	1057.53	74.559	28.85	0.72908	74.559	74.252	74.981	7.6294e-06		0	0	0	3.0272e-13	3	27586	169.25	169.25	1	62.325	18.099	0
ECLPLIIFLR	10	0	1	Unmodified	_ECLPLIIFLR_			0	0	P62701;A6NH36	P62701	P62701	RPS4X	40S ribosomal protein S4, X isoform	>sp|P62701|RS4X_HUMAN 40S ribosomal protein S4, X isoform OS=Homo sapiens GN=RPS4X PE=1 SV=2;>tr|A6NH36|A6NH36_HUMAN 40S ribosomal protein S4, X isoform OS=Homo sapiens GN=RPS4X PE=1 SV=1	MULTI-MSMS		JACB153_3	MCF7 R10K8	642.37	2	637.37	1272.73	43214.6	-0.029134	-0.16605	-0.19519	637.872	642.375	78.115	30.04	0.8865	78.115	77.662	78.549	0		0	0	0	0.0014595	2	28833	93.111	93.111	1	62.385	20.695	0
GYEEWLLNEIR	11	0	1	Unmodified	_GYEEWLLNEIR_			0	0	O43707;O43707-2;P12814;P12814-3;P12814-4;P12814-2;H9KV75;P35609;P35609-2	O43707;P12814	O43707	ACTN4;ACTN1;ACTN2	Alpha-actinin-4;Alpha-actinin-1;Alpha-actinin-2	>sp|O43707|ACTN4_HUMAN Alpha-actinin-4 OS=Homo sapiens GN=ACTN4 PE=1 SV=2;>sp|O43707-2|ACTN4_HUMAN Isoform ACTN4ISO of Alpha-actinin-4 OS=Homo sapiens GN=ACTN4;>sp|P12814|ACTN1_HUMAN Alpha-actinin-1 OS=Homo sapiens GN=ACTN1 PE=1 SV=2;>sp|P12814-3|ACTN1_HUM	MULTI-MSMS		JACB153_3	MCF7 R10K8	716.36	2	711.357	1420.7	40964.7	-0.18394	0.45984	0.2759	711.356	716.361	67.213	26.404	0.68913	67.213	66.788	67.477	0		0	0	0	0.00013813	1	24863	147.72	110.39	1	62.657	22.131	0
LHLSGIDANPNALFPPVEFPAPR	23	0	1	Unmodified	_LHLSGIDANPNALFPPVEFPAPR_			0	0	P49327	P49327	P49327	FASN	Fatty acid synthase;[Acyl-carrier-protein] S-acetyltransferase;[Acyl-carrier-protein] S-malonyltransferase;3-oxoacyl-[acyl-carrier-protein] synthase;3-oxoacyl-[acyl-carrier-protein] reductase;3-hydroxypalmitoyl-[acyl-carrier-protein] dehydratase;Enoyl-[acyl-carrier-protein] reductase;Oleoyl-[acyl-carrier-protein] hydrolase	>sp|P49327|FAS_HUMAN Fatty acid synthase OS=Homo sapiens GN=FASN PE=1 SV=3	MULTI-MSMS		JACB153_3	MCF7 R10K8	828.44	3	824.773	2471.3	38756.1	-0.46906	0.065913	-0.40315	825.108	828.443	67.221	26.404	0.45866	67.221	67.018	67.477	0		0	0	0	5.0609e-12	1	24871	145.9	145.9	1	62.728	17.5	0
ASLEAAIADAEQR	13	0	1	Unmodified	_ASLEAAIADAEQR_			0	0	P05787-2;CON__P05787;P05787;CON__H-INV:HIT000292931	P05787-2	P05787-2	KRT8	Keratin, type II cytoskeletal 8	>sp|P05787-2|K2C8_HUMAN Isoform 2 of Keratin, type II cytoskeletal 8 OS=Homo sapiens GN=KRT8;>P05787 SWISS-PROT:P05787 Tax_Id=9606 Gene_Symbol=KRT8 Keratin, type II cytoskeletal 8;>sp|P05787|K2C8_HUMAN Keratin, type II cytoskeletal 8 OS=Homo sapiens GN=KRT	MULTI-MSMS		JACB153_3	MCF7 R10K8	452.23	3	448.897	1343.67	51472.6	-0.47738	-0.24503	-0.72241	448.897	452.233	44.898	18.964	1.2684	44.898	44.462	45.73	0		0	0	0	2.2755e-05	3	16291	146.36	122.08	1	62.839	14.283	0
TEISEMNR	8	0	1	Unmodified	_TEISEMNR_			0	0	P05787-2;CON__P05787;P05787;CON__Q9H552;CON__REFSEQ:XP_092267	P05787-2	P05787-2	KRT8	Keratin, type II cytoskeletal 8	>sp|P05787-2|K2C8_HUMAN Isoform 2 of Keratin, type II cytoskeletal 8 OS=Homo sapiens GN=KRT8;>P05787 SWISS-PROT:P05787 Tax_Id=9606 Gene_Symbol=KRT8 Keratin, type II cytoskeletal 8;>sp|P05787|K2C8_HUMAN Keratin, type II cytoskeletal 8 OS=Homo sapiens GN=KRT	MULTI-MSMS		JACB153_3	MCF7 R10K8	495.23	2	490.229	978.444	49357.8	0.14847	-0.35243	-0.20397	490.23	495.234	19.171	10.394	0.70509	19.171	18.948	19.653	0		0	0	0	0.0024377	1	5067	103.56	88.698	1	62.841	18.544	0
ISMPDFDLHLK	11	1	0	Unmodified	_ISMPDFDLHLK_			0	0	Q09666	Q09666	Q09666	AHNAK	Neuroblast differentiation-associated protein AHNAK	>sp|Q09666|AHNK_HUMAN Neuroblast differentiation-associated protein AHNAK OS=Homo sapiens GN=AHNAK PE=1 SV=2	MULTI-MSMS		JACB153_3	MCF7 R10K8	441.9	3	439.229	1314.66	52430.1	-0.46673	-0.25358	-0.72031	439.229	441.9	53.827	21.94	0.54953	53.827	53.574	54.123	0		0	0	0	0.0016994	1	19807	91.701	91.701	1	62.875	16.792	0
YETELAMR	8	0	1	Unmodified	_YETELAMR_			0	0	P05783;F8VZY9	P05783	P05783	KRT18	Keratin, type I cytoskeletal 18	>sp|P05783|K1C18_HUMAN Keratin, type I cytoskeletal 18 OS=Homo sapiens GN=KRT18 PE=1 SV=2;>tr|F8VZY9|F8VZY9_HUMAN Keratin, type I cytoskeletal 18 OS=Homo sapiens GN=KRT18 PE=1 SV=1	MULTI-MSMS		JACB153_3	MCF7 R10K8	511.75	2	506.742	1011.47	48431	0.51968	-0.4446	0.075077	506.742	511.746	29.19	13.727	0.43578	29.19	29.009	29.445	1.9073e-06		0	0	0	0.0022813	1	9309	111.04	111.04	1	62.903	19.776	0
HLSPDGQYVPR	11	0	1	Unmodified	_HLSPDGQYVPR_			0	0	Q4JM47;O95994;B5MC07;C9J3E2;H7C3Z9	Q4JM47	Q4JM47	AGR2	Anterior gradient protein 2 homolog	>tr|Q4JM47|Q4JM47_HUMAN AGR2 OS=Homo sapiens GN=AGR2 PE=4 SV=1;>sp|O95994|AGR2_HUMAN Anterior gradient protein 2 homolog OS=Homo sapiens GN=AGR2 PE=1 SV=1;>tr|B5MC07|B5MC07_HUMAN Anterior gradient protein 2 homolog OS=Homo sapiens GN=AGR2 PE=2 SV=1;>tr|C9J	MULTI-MSMS		JACB153_3	MCF7 R10K8	426.89	3	423.551	1267.63	52609.4	0.18151	0.11752	0.29904	423.551	426.887	22.323	11.442	0.55436	22.323	22.016	22.571	0		0	0	0	0.00043758	2	6404	126.71	123.39	1	62.987	19.339	0
YEELQSLAGK	10	1	0	Unmodified	_YEELQSLAGK_			0	0	P05787-2;CON__P05787;P05787;CON__H-INV:HIT000292931	P05787-2	P05787-2	KRT8	Keratin, type II cytoskeletal 8	>sp|P05787-2|K2C8_HUMAN Isoform 2 of Keratin, type II cytoskeletal 8 OS=Homo sapiens GN=KRT8;>P05787 SWISS-PROT:P05787 Tax_Id=9606 Gene_Symbol=KRT8 Keratin, type II cytoskeletal 8;>sp|P05787|K2C8_HUMAN Keratin, type II cytoskeletal 8 OS=Homo sapiens GN=KRT	MULTI-MSMS		JACB153_3	MCF7 R10K8	573.3	2	569.293	1136.57	46197.1	-0.21082	-0.89615	-1.107	569.293	573.3	32.824	14.944	1.0686	32.824	32.579	33.647	0		0	0	0	0.00086906	1	11055	121.83	10.773	1	63.658	10.174	0
FASFIDK	7	1	0	Unmodified	_FASFIDK_			0	0	CON__Q3KNV1;P08729;CON__P08729;CON__Q9DCV7;CON__Q6ISB0;CON__Q9NSB2;Q9NSB2;CON__P19013;P19013;CON__Q6IME9;CON__Q14CN4-1;Q14CN4;Q14CN4-2;F5H8K9;Q14CN4-3;CON__P35908;P35908;CON__Q7Z794;Q7Z794;CON__Q6NXH9;CON__Q9R0H5;CON__Q3TTY5;CON__Q01546;Q01546;CON__P12035;J3QST3;P12035;F8W1S1;CON__Q32MB2;Q86Y46;CON__Q7RTS7;Q7RTS7;CON__P07744;CON__Q3SY84;Q3SY84;Q86Y46-2;F8VS61;H0YHD9;P05787-2;CON__P05787;P05787;F8…	CON__Q3KNV1;CON__P35908;P05787-2	P05787-2	KRT7;KRT84;KRT4;KRT72;KRT2;KRT77;KRT76;KRT3;KRT74;KRT73;KRT71;KRT8	Keratin, type II cytoskeletal 7;Keratin, type II cuticular Hb4;Keratin, type II cytoskeletal 4;Keratin, type II cytoskeletal 72;Keratin, type II cytoskeletal 2 epidermal;Keratin, type II cytoskeletal 1b;Keratin, type II cytoskeletal 2 oral;Keratin, type II cytoskeletal 3;Keratin, type II cytoskeletal 73;Keratin, type II cytoskeletal 74;Keratin, type II cytoskeletal 71;Keratin, type II cytoskeleta…	>Q3KNV1 TREMBL:Q3KNV1;Q96GE1 Tax_Id=9606 Gene_Symbol=KRT7 keratin 7;>sp|P08729|K2C7_HUMAN Keratin, type II cytoskeletal 7 OS=Homo sapiens GN=KRT7 PE=1 SV=5;>P08729 SWISS-PROT:P08729 Tax_Id=9606 Gene_Symbol=KRT7 Keratin, type II cytoskeletal 7;>Q9DCV7 SWISS	MULTI-MSMS		JACB153_3	MCF7 R10K8	418.23	2	414.219	826.423	52188.9	-0.071188	-0.86351	-0.93469	414.219	418.225	35.212	15.738	1.3615	35.212	34.836	36.197	0		0	0	0	0.0071357	4	11950	101.64	22.175	1	63.888	10.354	0
MFVLDEADEMLSR	13	0	1	Unmodified	_MFVLDEADEMLSR_			0	0	P60842;P60842-2;J3KT12;J3QS69;J3KTB5;J3QL43;J3QR64;J3KSZ0;J3QLN6;J3KTN0;Q14240-2;Q14240;E7EQG2;Q9NZE6	P60842;Q14240-2	P60842	EIF4A1;EIF4A2	Eukaryotic initiation factor 4A-I;Eukaryotic initiation factor 4A-II	>sp|P60842|IF4A1_HUMAN Eukaryotic initiation factor 4A-I OS=Homo sapiens GN=EIF4A1 PE=1 SV=1;>sp|P60842-2|IF4A1_HUMAN Isoform 2 of Eukaryotic initiation factor 4A-I OS=Homo sapiens GN=EIF4A1;>tr|J3KT12|J3KT12_HUMAN Eukaryotic initiation factor 4A-I OS=Homo	MULTI-MSMS		JACB153_3	MCF7 R10K8	783.36	2	778.36	1554.71	39360	-0.61245	-0.29092	-0.90336	778.862	783.365	67.675	26.555	0.6925	67.675	67.385	68.077	0		0	0	0	1.4188e-07	1	25024	185.59	185.59	1	63.989	21.88	0
IILDLISESPIK	12	1	0	Unmodified	_IILDLISESPIK_			0	0	P61978-3;Q5T6W5;Q5T6W2;P61978-2;P61978;Q5T6W1	P61978-3;P61978-2	P61978-2	HNRNPK	Heterogeneous nuclear ribonucleoprotein K	>sp|P61978-3|HNRPK_HUMAN Isoform 3 of Heterogeneous nuclear ribonucleoprotein K OS=Homo sapiens GN=HNRNPK;>tr|Q5T6W5|Q5T6W5_HUMAN Heterogeneous nuclear ribonucleoprotein K OS=Homo sapiens GN=HNRNPK PE=1 SV=1;>tr|Q5T6W2|Q5T6W2_HUMAN Heterogeneous nuclear ri	MULTI-MSMS		JACB153_3	MCF7 R10K8	674.91	2	670.905	1339.8	42902.2	-0.35638	0.37207	0.015686	670.906	674.913	66.001	26.001	0.97362	66.001	65.765	66.738	7.6294e-06		0	0	0	6.9369e-05	2	24412	138.75	138.75	1	64.172	16.211	0
GQVVSLIR	8	0	1	Unmodified	_GQVVSLIR_			0	0	P07384;E9PL37	P07384	P07384	CAPN1	Calpain-1 catalytic subunit	>sp|P07384|CAN1_HUMAN Calpain-1 catalytic subunit OS=Homo sapiens GN=CAPN1 PE=1 SV=1;>tr|E9PL37|E9PL37_HUMAN Calpain-1 catalytic subunit (Fragment) OS=Homo sapiens GN=CAPN1 PE=1 SV=1	MULTI-MSMS		JACB153_3	MCF7 R10K8	441.28	2	436.272	870.529	54115.5	-0.56379	-0.048034	-0.61183	436.272	441.276	33.022	15.007	0.55166	33.022	32.822	33.374	0		0	0	0	0.0065864	1	10987	81.296	15.417	1	64.217	18.618	0
MVNHFIAEFK	10	1	0	Unmodified	_MVNHFIAEFK_			0	0	P11142;E9PKE3;P11142-2;E9PN89;A8K7Q2	P11142	P11142	HSPA8	Heat shock cognate 71 kDa protein	>sp|P11142|HSP7C_HUMAN Heat shock cognate 71 kDa protein OS=Homo sapiens GN=HSPA8 PE=1 SV=1;>tr|E9PKE3|E9PKE3_HUMAN Heat shock cognate 71 kDa protein OS=Homo sapiens GN=HSPA8 PE=1 SV=1;>sp|P11142-2|HSP7C_HUMAN Isoform 2 of Heat shock cognate 71 kDa protein	MULTI-MSMS		JACB153_3	MCF7 R10K8	415.22	3	412.546	1234.62	53985.9	-0.13215	-0.44872	-0.58087	412.546	415.217	35.958	15.989	0.51938	35.958	35.733	36.252	0		0	0	0	0.0056977	1	12298	78.653	78.653	1	64.217	17.44	0
FSMPGFK	7	1	0	Unmodified	_FSMPGFK_			0	0	Q09666	Q09666	Q09666	AHNAK	Neuroblast differentiation-associated protein AHNAK	>sp|Q09666|AHNK_HUMAN Neuroblast differentiation-associated protein AHNAK OS=Homo sapiens GN=AHNAK PE=1 SV=2	MULTI-MSMS		JACB153_3	MCF7 R10K8	411.21	2	407.202	812.389	50411.9	0.40341	-0.19238	0.21103	407.202	411.209	43.786	18.599	0.93594	43.786	43.473	44.409	0		0	0	0	0.007633	2	15808	93.262	93.262	1	64.226	15.943	0
TPAQYDASELK	11	1	0	Unmodified	_TPAQYDASELK_			0	0	P07355-2;P07355;H0YN42;A6NMY6;H0YMU9;H0YMD0;H0YM50;H0YKS4;H0YNP5;H0YMM1;H0YMW4;H0YKX9;H0YMT9;H0YLV6;H0YKZ7	P07355-2	P07355-2	ANXA2;ANXA2P2	Annexin A2;Annexin;Putative annexin A2-like protein	>sp|P07355-2|ANXA2_HUMAN Isoform 2 of Annexin A2 OS=Homo sapiens GN=ANXA2;>sp|P07355|ANXA2_HUMAN Annexin A2 OS=Homo sapiens GN=ANXA2 PE=1 SV=2;>tr|H0YN42|H0YN42_HUMAN Annexin (Fragment) OS=Homo sapiens GN=ANXA2 PE=1 SV=1;>sp|A6NMY6|AXA2L_HUMAN Putative ann	MULTI-MSMS		JACB153_3	MCF7 R10K8	615.81	2	611.801	1221.59	44758.8	-0.61512	-0.4137	-1.0288	611.8	615.808	25.612	12.534	0.48624	25.612	25.416	25.902	0		0	0	0	9.2424e-06	1	7722	164.11	147.97	1	64.378	15.009	0
GNKPWISLPR	10	1	1	Unmodified	_GNKPWISLPR_			0	0	P62701;P22090;Q8TD47;C9JEH7	P62701	P62701	RPS4X;RPS4Y1;RPS4Y2	40S ribosomal protein S4, X isoform;40S ribosomal protein S4, Y isoform 1;40S ribosomal protein S4, Y isoform 2	>sp|P62701|RS4X_HUMAN 40S ribosomal protein S4, X isoform OS=Homo sapiens GN=RPS4X PE=1 SV=2;>sp|P22090|RS4Y1_HUMAN 40S ribosomal protein S4, Y isoform 1 OS=Homo sapiens GN=RPS4Y1 PE=1 SV=2;>sp|Q8TD47|RS4Y2_HUMAN 40S ribosomal protein S4, Y isoform 2 OS=Ho	MULTI-MSMS		JACB153_3	MCF7 R10K8	395.9	3	389.893	1166.66	54739	-0.37478	1.059	0.68418	390.227	395.901	35.079	15.696	0.4229	35.079	34.873	35.296	0		0	0	0	0.0074775	1	11919	87.568	77.881	1	64.583	81.226	0
SLTNDWEDHLAVK	13	1	0	Unmodified	_SLTNDWEDHLAVK_			0	0	P07900-2;P07900;Q86U12;P08238	P07900-2;P08238	P07900-2	HSP90AA1;HSP90AB1	Heat shock protein HSP 90-alpha;Heat shock protein HSP 90-beta	>sp|P07900-2|HS90A_HUMAN Isoform 2 of Heat shock protein HSP 90-alpha OS=Homo sapiens GN=HSP90AA1;>sp|P07900|HS90A_HUMAN Heat shock protein HSP 90-alpha OS=Homo sapiens GN=HSP90AA1 PE=1 SV=5;>tr|Q86U12|Q86U12_HUMAN Full-length cDNA clone CS0CAP007YF18 of T	MULTI-MSMS		JACB153_3	MCF7 R10K8	512.59	3	509.919	1526.74	48454.8	-0.19758	-0.65554	-0.85312	509.92	512.591	41.54	17.849	1.2074	41.54	41.117	42.325	0		0	0	0	0.0001759	3	14852	101.6	101.6	1	64.662	12.17	0
APILIATDVASR	12	0	1	Unmodified	_APILIATDVASR_			0	0	H3BLZ8;Q92841;C9JMU5;Q92841-2;Q92841-3;Q92841-1;J3KTA4;P17844;B4DLW8	H3BLZ8;J3KTA4	J3KTA4	DDX17;DDX5	Probable ATP-dependent RNA helicase DDX17;Probable ATP-dependent RNA helicase DDX5	>tr|H3BLZ8|H3BLZ8_HUMAN Probable ATP-dependent RNA helicase DDX17 OS=Homo sapiens GN=DDX17 PE=1 SV=1;>sp|Q92841|DDX17_HUMAN Probable ATP-dependent RNA helicase DDX17 OS=Homo sapiens GN=DDX17 PE=1 SV=2;>tr|C9JMU5|C9JMU5_HUMAN Probable ATP-dependent RNA heli	MULTI-MSMS		JACB153_3	MCF7 R10K8	618.86	2	613.859	1225.7	44835.1	0.34396	-0.20789	0.13607	613.859	618.863	43.665	18.557	0.42684	43.665	43.473	43.9	0		0	0	0	8.1054e-05	1	15673	135.6	135.6	1	64.752	20.852	0
ISSSSFSR	8	0	1	Unmodified	_ISSSSFSR_			0	0	P05787-2;CON__P05787;P05787;F8VUG2;F8W1U3;F8VRG4;F8VQY3	P05787-2	P05787-2	KRT8	Keratin, type II cytoskeletal 8	>sp|P05787-2|K2C8_HUMAN Isoform 2 of Keratin, type II cytoskeletal 8 OS=Homo sapiens GN=KRT8;>P05787 SWISS-PROT:P05787 Tax_Id=9606 Gene_Symbol=KRT8 Keratin, type II cytoskeletal 8;>sp|P05787|K2C8_HUMAN Keratin, type II cytoskeletal 8 OS=Homo sapiens GN=KRT	MULTI-MSMS		JACB153_3	MCF7 R10K8	440.72	2	435.719	869.424	52299	-0.2307	0.78383	0.55313	435.721	440.724	18.901	10.296	0.78828	18.901	18.583	19.371	0		0	0	0	0.0022622	1	4886	111.95	8.2081	1	64.831	16.405	0
IVLQIDNAR	9	0	1	Unmodified	_IVLQIDNAR_			0	0	CON__P08727;P08727;C9JM50;CON__P19001;P05783;F8VZY9	CON__P08727;P05783	CON__P08727	KRT19;KRT18	Keratin, type I cytoskeletal 19;Keratin, type I cytoskeletal 18	>P08727 SWISS-PROT:P08727 Tax_Id=9606 Gene_Symbol=KRT19 Keratin, type I cytoskeletal 19;>sp|P08727|K1C19_HUMAN Keratin, type I cytoskeletal 19 OS=Homo sapiens GN=KRT19 PE=1 SV=4;>tr|C9JM50|C9JM50_HUMAN Keratin, type I cytoskeletal 19 (Fragment) OS=Homo sap	MULTI-MSMS		JACB153_3	MCF7 R10K8	526.31	2	521.306	1040.6	48015.6	-0.0091387	0.2646	0.25546	521.306	526.311	35.454	15.818	0.68563	35.454	35.234	35.92	0		0	0	0	0.00019442	2	12080	147.51	83.243	1	65	13.559	0
LEQEIATYR	9	0	1	Unmodified	_LEQEIATYR_			0	0	CON__Q9QWL7;CON__P02533;P02533;CON__Q6IFX2;CON__P08727;P08727;CON__P19001;CON__A2A4G1;CON__P08779;P08779;F5GWP8;CON__P13646-1	CON__Q9QWL7;CON__P08727;F5GWP8;CON__P13646-1	CON__P08727	KRT14;KRT19;KRT16;JUP	Keratin, type I cytoskeletal 14;Keratin, type I cytoskeletal 19;Keratin, type I cytoskeletal 16	>Q9QWL7 SWISS-PROT:Q9QWL7 Tax_Id=10090 Gene_Symbol=Krt17 Keratin, type I cytoskeletal 17;>P02533 SWISS-PROT:P02533 Tax_Id=9606 Gene_Symbol=KRT14 Keratin, type I cytoskeletal 14;>sp|P02533|K1C14_HUMAN Keratin, type I cytoskeletal 14 OS=Homo sapiens GN=KRT14	MULTI-MSMS		JACB153_3	MCF7 R10K8	566.8	2	561.793	1121.57	46057.1	-0.43711	0.22459	-0.21251	561.794	566.797	27.48	13.162	0.54132	27.48	27.266	27.808	-1.9073e-06		0	0	0	1.5461e-05	2	8541	163.94	107.38	1	65.228	16.465	0
IALDFQR	7	0	1	Unmodified	_IALDFQR_			0	0	P17931;G3V3R6	P17931	P17931	LGALS3	Galectin-3	>sp|P17931|LEG3_HUMAN Galectin-3 OS=Homo sapiens GN=LGALS3 PE=1 SV=5;>tr|G3V3R6|G3V3R6_HUMAN Galectin OS=Homo sapiens GN=LGALS3 PE=1 SV=1	MULTI-MSMS		JACB153_3	MCF7 R10K8	436.75	2	431.743	861.471	51541.4	-0.37567	0.014254	-0.36142	431.743	436.747	38.049	16.681	0.58718	38.049	37.861	38.448	0		0	0	0	0.014085	1	13268	77.058	25.27	1	65.336	18.701	0
AVTEQGHELSNEER	14	0	1	Unmodified	_AVTEQGHELSNEER_			0	0	P31946;P31946-2;Q4VY19;Q4VY20	P31946	P31946	YWHAB	14-3-3 protein beta/alpha;14-3-3 protein beta/alpha, N-terminally processed	>sp|P31946|1433B_HUMAN 14-3-3 protein beta/alpha OS=Homo sapiens GN=YWHAB PE=1 SV=3;>sp|P31946-2|1433B_HUMAN Isoform Short of 14-3-3 protein beta/alpha OS=Homo sapiens GN=YWHAB;>tr|Q4VY19|Q4VY19_HUMAN 14-3-3 protein beta/alpha (Fragment) OS=Homo sapiens GN	MULTI-MSMS		JACB153_3	MCF7 R10K8	536.92	3	533.585	1597.73	48041.4	0.4431	-0.23055	0.21255	533.585	536.921	15.356	9.1209	0.63821	15.356	15.16	15.798	0		0	0	0	1.3115e-05	3	3578	131.66	131.66	1	65.368	20.232	0
AEYLASIFGTEK	12	1	0	Acetyl (Protein N-term)	_(ac)AEYLASIFGTEK_			1	0	Q01081;Q01081-2;Q8WU68;Q8WU68-3;Q8WU68-2;M0R2N4;Q01081-3;M0QYK5;K7EJM7;K7EJH3;K7EPL9	Q01081	Q01081	U2AF1;U2AF1L4	Splicing factor U2AF 35 kDa subunit;Splicing factor U2AF 26 kDa subunit	>sp|Q01081|U2AF1_HUMAN Splicing factor U2AF 35 kDa subunit OS=Homo sapiens GN=U2AF1 PE=1 SV=3;>sp|Q01081-2|U2AF1_HUMAN Isoform 2 of Splicing factor U2AF 35 kDa subunit OS=Homo sapiens GN=U2AF1;>sp|Q8WU68|U2AF4_HUMAN Splicing factor U2AF 26 kDa subunit OS=H	MULTI-MSMS		JACB153_3	MCF7 R10K8	689.85	2	685.846	1369.68	42125.2	-0.08277	-0.063617	-0.14639	685.845	689.853	92.858	34.951	0.73434	92.858	92.51	93.244	7.6294e-06		0	0	0	0.00015626	2	33988	112.43	112.43	1	65.415	25.093	0
ILTTNTWSSELSK	13	1	0	Unmodified	_ILTTNTWSSELSK_			0	0	O60701;O60701-2;O60701-3	O60701	O60701	UGDH	UDP-glucose 6-dehydrogenase	>sp|O60701|UGDH_HUMAN UDP-glucose 6-dehydrogenase OS=Homo sapiens GN=UGDH PE=1 SV=1;>sp|O60701-2|UGDH_HUMAN Isoform 2 of UDP-glucose 6-dehydrogenase OS=Homo sapiens GN=UGDH;>sp|O60701-3|UGDH_HUMAN Isoform 3 of UDP-glucose 6-dehydrogenase OS=Homo sapiens GN	MULTI-MSMS		JACB153_3	MCF7 R10K8	744.4	2	740.388	1478.76	40750.3	-0.50617	0.4398	-0.066373	740.388	744.396	44.002	18.663	0.58468	44.002	43.754	44.338	0		0	0	0	0.00010975	2	15782	115.8	115.8	1	65.434	17.431	0
SQYEVMAEQNR	11	0	1	Unmodified	_SQYEVMAEQNR_			0	0	CON__P08727;P08727;K7EMS3	CON__P08727	CON__P08727	KRT19	Keratin, type I cytoskeletal 19	>P08727 SWISS-PROT:P08727 Tax_Id=9606 Gene_Symbol=KRT19 Keratin, type I cytoskeletal 19;>sp|P08727|K1C19_HUMAN Keratin, type I cytoskeletal 19 OS=Homo sapiens GN=KRT19 PE=1 SV=4;>tr|K7EMS3|K7EMS3_HUMAN Keratin, type I cytoskeletal 19 (Fragment) OS=Homo sap	MULTI-MSMS		JACB153_3	MCF7 R10K8	682.81	2	677.806	1353.6	42232.9	-0.64043	-0.38491	-1.0253	677.807	682.81	25.187	12.398	0.68141	25.187	24.932	25.613	0		0	0	0	4.0518e-09	2	7495	197.94	180.77	1	65.68	16.227	0
DGTVLCELINALYPEGQAPVK	21	1	0	Unmodified	_DGTVLCELINALYPEGQAPVK_			0	0	P37802;X6RJP6	P37802	P37802	TAGLN2	Transgelin-2	>sp|P37802|TAGL2_HUMAN Transgelin-2 OS=Homo sapiens GN=TAGLN2 PE=1 SV=3;>tr|X6RJP6|X6RJP6_HUMAN Transgelin-2 (Fragment) OS=Homo sapiens GN=TAGLN2 PE=4 SV=1	MULTI-MSMS		JACB153_3	MCF7 R10K8	766.06	3	763.059	2286.16	40592	-0.41664	0.14393	-0.27271	763.394	766.065	93.643	39.129	1.2615	93.643	92.95	94.211	0		0	0	0	2.8672e-13	2	34248	155.28	155.28	1	65.817	21.416	0
LSLEGDHSTPPSAYGSVK	18	1	0	Unmodified	_LSLEGDHSTPPSAYGSVK_			0	0	P07355-2;P07355;H0YN42;A6NMY6;H0YMU9;H0YMD0;H0YKS4;H0YMM1;H0YMW4;H0YKX9;H0YMT9;H0YLV6;H0YKZ7;H0YKL9;H0YKV8;H0YMD9;H0YKN4;H0YNB8	P07355-2	P07355-2	ANXA2;ANXA2P2	Annexin A2;Annexin;Putative annexin A2-like protein	>sp|P07355-2|ANXA2_HUMAN Isoform 2 of Annexin A2 OS=Homo sapiens GN=ANXA2;>sp|P07355|ANXA2_HUMAN Annexin A2 OS=Homo sapiens GN=ANXA2 PE=1 SV=2;>tr|H0YN42|H0YN42_HUMAN Annexin (Fragment) OS=Homo sapiens GN=ANXA2 PE=1 SV=1;>sp|A6NMY6|AXA2L_HUMAN Putative ann	MULTI-MSMS		JACB153_3	MCF7 R10K8	618.31	3	615.639	1843.9	44376.7	-0.17829	-0.38834	-0.56662	615.639	618.31	31.14	14.382	0.8349	31.14	30.744	31.579	1.9073e-06		0	0	0	8.5042e-13	2	10133	157.12	157.12	1	65.866	15.856	0
IPDWFLNR	8	0	1	Unmodified	_IPDWFLNR_			0	0	P62269;J3JS69	P62269	P62269	RPS18	40S ribosomal protein S18	>sp|P62269|RS18_HUMAN 40S ribosomal protein S18 OS=Homo sapiens GN=RPS18 PE=1 SV=3;>tr|J3JS69|J3JS69_HUMAN 40S ribosomal protein S18 OS=Homo sapiens GN=RPS18 PE=1 SV=1	MULTI-MSMS		JACB153_3	MCF7 R10K8	535.79	2	530.782	1059.55	47945.6	-0.22536	0.66123	0.43588	530.783	535.787	56.621	22.877	0.73688	56.621	56.275	57.012	3.8147e-06		0	0	0	0.002084	2	21016	120.46	92.239	1	65.869	19.546	0
AYLPVNESFGFTADLR	16	0	1	Unmodified	_AYLPVNESFGFTADLR_			0	0	P13639	P13639	P13639	EEF2	Elongation factor 2	>sp|P13639|EF2_HUMAN Elongation factor 2 OS=Homo sapiens GN=EEF2 PE=1 SV=4	MULTI-MSMS		JACB153_3	MCF7 R10K8	603.97	3	600.637	1798.89	45478.5	-0.169	0.41079	0.24179	600.637	603.973	64.94	25.65	0.8446	64.94	64.681	65.526	0		0	0	0	5.4785e-08	1	24045	147.1	147.1	1	65.895	23.243	0
YFPTQALNFAFK	12	1	0	Unmodified	_YFPTQALNFAFK_			0	0	P05141;Q9H0C2;P12236;I7HJJ0;P12235;V9GYG0	P05141;P12236;P12235	P12236	SLC25A5;SLC25A31;SLC25A6;SLC25A4	ADP/ATP translocase 2;ADP/ATP translocase 4;ADP/ATP translocase 3;ADP/ATP translocase 1	>sp|P05141|ADT2_HUMAN ADP/ATP translocase 2 OS=Homo sapiens GN=SLC25A5 PE=1 SV=7;>sp|Q9H0C2|ADT4_HUMAN ADP/ATP translocase 4 OS=Homo sapiens GN=SLC25A31 PE=2 SV=1;>sp|P12236|ADT3_HUMAN ADP/ATP translocase 3 OS=Homo sapiens GN=SLC25A6 PE=1 SV=4;>tr|I7HJJ0|I	MULTI-MSMS		JACB153_3	MCF7 R10K8	727.88	2	723.874	1445.73	40625	-0.26474	-0.16336	-0.4281	724.374	727.881	64.546	25.511	0.87709	64.546	64.244	65.121	0		0	0	0	0.00022015	2	23884	111.86	111.86	1	66.116	15.801	0
TEMENEFVLIK	11	1	0	Unmodified	_TEMENEFVLIK_			0	0	P05787-2;CON__P05787;P05787;F8VUG2;CON__H-INV:HIT000292931;F8W1U3;F8VP67;CON__H-INV:HIT000016045	P05787-2	P05787-2	KRT8	Keratin, type II cytoskeletal 8	>sp|P05787-2|K2C8_HUMAN Isoform 2 of Keratin, type II cytoskeletal 8 OS=Homo sapiens GN=KRT8;>P05787 SWISS-PROT:P05787 Tax_Id=9606 Gene_Symbol=KRT8 Keratin, type II cytoskeletal 8;>sp|P05787|K2C8_HUMAN Keratin, type II cytoskeletal 8 OS=Homo sapiens GN=KRT	MULTI-MSMS		JACB153_3	MCF7 R10K8	680.85	2	676.842	1351.67	42160.2	-0.55841	-1.0129	-1.5713	676.84	680.849	52.039	21.346	0.77695	52.039	51.753	52.53	0		0	0	0	0.00072025	2	19089	99.752	70.946	1	66.14	15.212	0
FIEIAAR	7	0	1	Unmodified	_FIEIAAR_			0	0	Q00839;Q00839-2	Q00839	Q00839	HNRNPU	Heterogeneous nuclear ribonucleoprotein U	>sp|Q00839|HNRPU_HUMAN Heterogeneous nuclear ribonucleoprotein U OS=Homo sapiens GN=HNRNPU PE=1 SV=6;>sp|Q00839-2|HNRPU_HUMAN Isoform Short of Heterogeneous nuclear ribonucleoprotein U OS=Homo sapiens GN=HNRNPU	MULTI-MSMS		JACB153_3	MCF7 R10K8	415.24	2	410.24	818.465	53504.5	-0.15375	-0.24373	-0.39748	410.238	415.244	33.089	15.027	0.49949	33.089	32.867	33.366	3.8147e-06		0	0	0	0.012842	1	11029	80.18	21.602	1	66.426	19.878	0
VPTANVSVVDLTCR	14	0	1	Unmodified	_VPTANVSVVDLTCR_			0	0	P04406;P04406-2;E7EUT5	P04406	P04406	GAPDH	Glyceraldehyde-3-phosphate dehydrogenase	>sp|P04406|G3P_HUMAN Glyceraldehyde-3-phosphate dehydrogenase OS=Homo sapiens GN=GAPDH PE=1 SV=3;>sp|P04406-2|G3P_HUMAN Isoform 2 of Glyceraldehyde-3-phosphate dehydrogenase OS=Homo sapiens GN=GAPDH;>tr|E7EUT5|E7EUT5_HUMAN Glyceraldehyde-3-phosphate dehydr	MULTI-MSMS		JACB153_3	MCF7 R10K8	514.27	3	510.936	1529.79	48410.6	-0.50759	-0.653	-1.1606	510.936	514.272	45.816	19.272	0.74067	45.816	45.583	46.323	0		0	0	0	3.9932e-05	1	16563	113.37	105.12	1	66.537	17.362	0
DISEASVFDAYVLPK	15	1	0	Unmodified	_DISEASVFDAYVLPK_			0	0	P62854	P62854	P62854	RPS26	40S ribosomal protein S26	>sp|P62854|RS26_HUMAN 40S ribosomal protein S26 OS=Homo sapiens GN=RPS26 PE=1 SV=3	MULTI-MSMS		JACB153_3	MCF7 R10K8	831.43	2	827.422	1652.83	37951.8	-0.41103	0.070039	-0.34099	827.925	831.429	70.227	27.412	0.72884	70.227	69.88	70.609	0		0	0	0	2.2981e-07	2	25951	134.9	134.9	1	66.728	20.372	0
FSPAGPILSIR	11	0	1	Unmodified	_FSPAGPILSIR_			0	0	P11940;P11940-2;E7ERJ7;Q9H361;H0YBN4;E5RJB9;E5RH24;Q4VXU2;E5RHG7;Q4VY17;E5RFD8;E5RGC4	P11940	P11940	PABPC1;PABPC3;PABPC1L;C20orf119	Polyadenylate-binding protein 1;Polyadenylate-binding protein 3;Polyadenylate-binding protein 1-like	>sp|P11940|PABP1_HUMAN Polyadenylate-binding protein 1 OS=Homo sapiens GN=PABPC1 PE=1 SV=2;>sp|P11940-2|PABP1_HUMAN Isoform 2 of Polyadenylate-binding protein 1 OS=Homo sapiens GN=PABPC1;>tr|E7ERJ7|E7ERJ7_HUMAN Polyadenylate-binding protein 1 OS=Homo sapie	MULTI-MSMS		JACB153_3	MCF7 R10K8	584.34	2	579.337	1156.66	46367.6	-0.022352	-0.1875	-0.20985	579.337	584.341	50.871	20.955	0.52562	50.871	50.643	51.168	-3.8147e-06		0	0	0	0.0037354	1	18613	86.911	75.985	1	66.729	20.751	0
TAFQEALDAAGDK	13	1	0	Unmodified	_TAFQEALDAAGDK_			0	0	P10599;P10599-2	P10599	P10599	TXN	Thioredoxin	>sp|P10599|THIO_HUMAN Thioredoxin OS=Homo sapiens GN=TXN PE=1 SV=3;>sp|P10599-2|THIO_HUMAN Isoform 2 of Thioredoxin OS=Homo sapiens GN=TXN	MULTI-MSMS		JACB153_3	MCF7 R10K8	672.83	2	668.823	1335.63	42163.9	-1.409	-0.21313	-1.6221	668.822	672.83	42.397	18.129	0.7201	42.397	42.037	42.757	0		0	0	0	4.7585e-05	2	15172	134.21	130.33	1	66.764	13.949	0
TEWLDGK	7	1	0	Unmodified	_TEWLDGK_			0	0	Q567Q0;A2BFH1;P62937;F5H284;Q9Y536	Q567Q0;P62937	P62937	PPIA;PPIAL4G;PPIAL4D;PPIAL4A	Peptidyl-prolyl cis-trans isomerase A-like 4G;Peptidyl-prolyl cis-trans isomerase A;Peptidyl-prolyl cis-trans isomerase;Peptidyl-prolyl cis-trans isomerase A-like 4A/B/C	>tr|Q567Q0|Q567Q0_HUMAN Peptidyl-prolyl cis-trans isomerase A OS=Homo sapiens GN=PPIA PE=1 SV=1;>sp|A2BFH1|PAL4G_HUMAN Peptidyl-prolyl cis-trans isomerase A-like 4G OS=Homo sapiens GN=PPIAL4G PE=2 SV=1;>sp|P62937|PPIA_HUMAN Peptidyl-prolyl cis-trans isomer	MULTI-MSMS		JACB153_3	MCF7 R10K8	428.72	2	424.711	847.408	53524.9	0.21952	-0.23232	-0.012796	424.711	428.718	29.191	13.734	0.96544	29.191	28.847	29.813	0		0	0	0	0.0080612	1	9280	92.187	92.187	1	67.096	16.014	0
DSTLIMQLLR	10	0	1	Unmodified	_DSTLIMQLLR_			0	0	P27348;P31946;P31946-2;P63104;E7EX29;B0AZS6;P63104-2;H0YB80;B7Z2E6;P62258;P62258-2;K7EM20;P61981;Q04917;P31947;P31947-2	P27348;P31946;P63104;P62258;P61981;Q04917;P31947	P27348	YWHAQ;YWHAB;YWHAZ;YWHAE;YWHAG;YWHAH;SFN	14-3-3 protein theta;14-3-3 protein beta/alpha;14-3-3 protein beta/alpha, N-terminally processed;14-3-3 protein zeta/delta;14-3-3 protein epsilon;14-3-3 protein gamma;14-3-3 protein gamma, N-terminally processed;14-3-3 protein eta;14-3-3 protein sigma	>sp|P27348|1433T_HUMAN 14-3-3 protein theta OS=Homo sapiens GN=YWHAQ PE=1 SV=1;>sp|P31946|1433B_HUMAN 14-3-3 protein beta/alpha OS=Homo sapiens GN=YWHAB PE=1 SV=3;>sp|P31946-2|1433B_HUMAN Isoform Short of 14-3-3 protein beta/alpha OS=Homo sapiens GN=YWHAB;	MULTI-MSMS		JACB153_3	MCF7 R10K8	600.34	2	595.334	1188.65	45126	0.26673	-0.65125	-0.38453	595.334	600.338	72.26	28.088	1.7937	72.26	71.95	73.744	0		0	0	0	0.00068484	5	26642	130.66	106.57	1	67.105	14.532	0
TLLEGSGLESIISIIHSSLAEPR	23	0	1	Unmodified	_TLLEGSGLESIISIIHSSLAEPR_			0	0	P49327	P49327	P49327	FASN	Fatty acid synthase;[Acyl-carrier-protein] S-acetyltransferase;[Acyl-carrier-protein] S-malonyltransferase;3-oxoacyl-[acyl-carrier-protein] synthase;3-oxoacyl-[acyl-carrier-protein] reductase;3-hydroxypalmitoyl-[acyl-carrier-protein] dehydratase;Enoyl-[acyl-carrier-protein] reductase;Oleoyl-[acyl-carrier-protein] hydrolase	>sp|P49327|FAS_HUMAN Fatty acid synthase OS=Homo sapiens GN=FASN PE=1 SV=3	MULTI-MSMS		JACB153_3	MCF7 R10K8	811.78	3	808.111	2421.31	39105.7	-0.26299	-0.23877	-0.50176	808.78	811.781	87.721	33.244	1.0786	87.721	87.347	88.425	7.6294e-06		0	0	0	2.6597e-18	2	32203	175.61	175.61	1	67.138	24.713	0
EFADSLGIPFLETSAK	16	1	0	Unmodified	_EFADSLGIPFLETSAK_			0	0	Q9H0U4;E9PLD0;Q92928;P62820;E7END7;B7Z8M7;P62820-2;P62820-3;E7ETK2	Q9H0U4;P62820	Q9H0U4	RAB1B;RAB1C;RAB1A	Ras-related protein Rab-1B;Putative Ras-related protein Rab-1C;Ras-related protein Rab-1A	>sp|Q9H0U4|RAB1B_HUMAN Ras-related protein Rab-1B OS=Homo sapiens GN=RAB1B PE=1 SV=1;>tr|E9PLD0|E9PLD0_HUMAN Ras-related protein Rab-1B OS=Homo sapiens GN=RAB1B PE=2 SV=1;>sp|Q92928|RAB1C_HUMAN Putative Ras-related protein Rab-1C OS=Homo sapiens GN=RAB1C P	MULTI-MSMS		JACB153_3	MCF7 R10K8	866.95	2	862.941	1723.87	37986.4	-0.09316	-0.55519	-0.64835	862.94	866.947	74.197	28.732	0.84869	74.197	73.852	74.7	0		0	0	0	1.1829e-08	2	27449	155.22	155.22	1	67.14	17.201	0
HQGVMVGMGQK	11	1	0	Unmodified	_HQGVMVGMGQK_			0	0	CON__P60712;P60709;E7EVS6;G5E9R0;C9JZR7;C9JUM1;C9JTX5;Q562R1;P68032;P68133;P62736;P63267;A6NL76;Q5T8M8;Q5T8M7;F6QUT6;F6UVQ4;C9JFL5;B8ZZJ2;F8WB63;P63261;I3L1U9;I3L3I0;J3KT65;I3L3R2;K7EM38	CON__P60712;P68032;P63261	CON__P60712	ACTB;ACTBL2;ACTC1;ACTA1;ACTA2;ACTG2;ACTG1	Actin, cytoplasmic 1;Actin, cytoplasmic 1, N-terminally processed;Beta-actin-like protein 2;Actin, alpha cardiac muscle 1;Actin, alpha skeletal muscle;Actin, aortic smooth muscle;Actin, gamma-enteric smooth muscle;Actin, cytoplasmic 2;Actin, cytoplasmic 2, N-terminally processed	>P60712 SWISS-PROT:P60712 (Bos taurus) Actin, cytoplasmic 1;>sp|P60709|ACTB_HUMAN Actin, cytoplasmic 1 OS=Homo sapiens GN=ACTB PE=1 SV=1;>tr|E7EVS6|E7EVS6_HUMAN Actin, cytoplasmic 1 (Fragment) OS=Homo sapiens GN=ACTB PE=1 SV=2;>tr|G5E9R0|G5E9R0_HUMAN Actin	MULTI-MSMS		JACB153_3	MCF7 R10K8	590.3	2	586.289	1170.56	44786.8	-0.19495	-0.84589	-1.0408	586.289	590.296	17.785	9.9312	0.54668	17.785	17.522	18.068	0		0	0	0	7.4229e-06	1	4479	168.79	168.79	1	67.168	16.642	0
AQYDELAR	8	0	1	Unmodified	_AQYDELAR_			0	0	P05783;F8VZY9	P05783	P05783	KRT18	Keratin, type I cytoskeletal 18	>sp|P05783|K1C18_HUMAN Keratin, type I cytoskeletal 18 OS=Homo sapiens GN=KRT18 PE=1 SV=2;>tr|F8VZY9|F8VZY9_HUMAN Keratin, type I cytoskeletal 18 OS=Homo sapiens GN=KRT18 PE=1 SV=1	MULTI-MSMS		JACB153_3	MCF7 R10K8	488.24	2	483.238	964.461	49443.5	-0.36786	-1.598	-1.9659	483.238	488.241	23.863	11.952	0.56885	23.863	23.658	24.227	0		0	0	0	0.0027944	2	6996	93.374	20.114	1	67.425	14.628	0
VLATVTKPVGGDK	13	2	0	Unmodified	_VLATVTKPVGGDK_			0	0	Q02878;U3KQR5;F8VZ45;F8VU16;F8VWR1;F8VZA3	Q02878	Q02878	RPL6	60S ribosomal protein L6	>sp|Q02878|RL6_HUMAN 60S ribosomal protein L6 OS=Homo sapiens GN=RPL6 PE=1 SV=3;>tr|U3KQR5|U3KQR5_HUMAN 60S ribosomal protein L6 (Fragment) OS=Homo sapiens GN=RPL6 PE=1 SV=1;>tr|F8VZ45|F8VZ45_HUMAN 60S ribosomal protein L6 (Fragment) OS=Homo sapiens GN=RPL	MULTI-MSMS		JACB153_3	MCF7 R10K8	434.27	3	428.922	1283.74	53164.3	-0.10599	-0.13695	-0.24294	428.923	434.265	19.879	10.628	0.35698	19.879	19.749	20.106	0		0	0	0	6.1065e-05	1	5315	145.17	86.489	1	67.437	116.17	0
LIALLEVLSQK	11	1	0	Unmodified	_LIALLEVLSQK_			0	0	Q14315;Q14315-2;P21333;P21333-2;Q5HY54;F8WE98;O75369;O75369-9;O75369-2;O75369-3;O75369-6;O75369-4;O75369-5;O75369-8	Q14315;P21333;O75369;O75369-8	O75369-8	FLNC;FLNA;FLNB	Filamin-C;Filamin-A;Filamin-B	>sp|Q14315|FLNC_HUMAN Filamin-C OS=Homo sapiens GN=FLNC PE=1 SV=3;>sp|Q14315-2|FLNC_HUMAN Isoform 2 of Filamin-C OS=Homo sapiens GN=FLNC;>sp|P21333|FLNA_HUMAN Filamin-A OS=Homo sapiens GN=FLNA PE=1 SV=4;>sp|P21333-2|FLNA_HUMAN Isoform 2 of Filamin-A OS=Hom	MULTI-MSMS		JACB153_3	MCF7 R10K8	617.9	2	613.89	1225.76	44816.8	0.28944	-0.15582	0.13363	613.888	617.897	71.677	27.896	0.78774	71.677	71.366	72.154	0		0	0	0	0.00018864	2	26557	144.17	141.22	1	67.449	18.857	0
LATQSNEITIPVTFESR	17	0	1	Unmodified	_LATQSNEITIPVTFESR_			0	0	P04792;C9J3N8	P04792	P04792	HSPB1	Heat shock protein beta-1	>sp|P04792|HSPB1_HUMAN Heat shock protein beta-1 OS=Homo sapiens GN=HSPB1 PE=1 SV=2;>tr|C9J3N8|C9J3N8_HUMAN Heat shock protein beta-1 OS=Homo sapiens GN=HSPB1 PE=1 SV=1	MULTI-MSMS		JACB153_3	MCF7 R10K8	953.5	2	953.499	1904.98	35782.3	-0.7083	-0.11136	-0.81966	953.501	958.504	55.388	22.465	0.82111	55.388	55.069	55.89	0		0	0	0	1.1926e-13	3	20450	210.91	210.91	1	67.629	11.076	0
LEAEIATYR	9	0	1	Unmodified	_LEAEIATYR_			0	0	P05783;F8VZY9	P05783	P05783	KRT18	Keratin, type I cytoskeletal 18	>sp|P05783|K1C18_HUMAN Keratin, type I cytoskeletal 18 OS=Homo sapiens GN=KRT18 PE=1 SV=2;>tr|F8VZY9|F8VZY9_HUMAN Keratin, type I cytoskeletal 18 OS=Homo sapiens GN=KRT18 PE=1 SV=1	MULTI-MSMS		JACB153_3	MCF7 R10K8	538.29	2	533.282	1064.55	47762.9	-0.097906	-0.24372	-0.34162	533.283	538.287	31.654	14.555	0.85767	31.654	31.44	32.297	-1.9073e-06		0	0	0	0.00024716	2	10376	144.77	115.3	1	67.652	14.905	0
LLLIGDSGVGK	11	1	0	Unmodified	_LLLIGDSGVGK_			0	0	P61006;B4DEK7;P59190;P59190-2;Q92930;F5GY21;H0YNE9;H0YMN7;H0YL94;H0YLJ8;P61026;Q9H0U4;E9PLD0;Q92928;P62820;E7END7;B7Z8M7;P62820-2;P62820-3;E7ETK2;P51153	P61006;P61026;Q9H0U4;P62820;P51153	Q9H0U4	RAB8A;RAB15;RAB8B;RAB10;RAB1B;RAB1C;RAB1A;RAB13	Ras-related protein Rab-8A;Ras-related protein Rab-15;Ras-related protein Rab-8B;Ras-related protein Rab-10;Ras-related protein Rab-1B;Putative Ras-related protein Rab-1C;Ras-related protein Rab-1A;Ras-related protein Rab-13	>sp|P61006|RAB8A_HUMAN Ras-related protein Rab-8A OS=Homo sapiens GN=RAB8A PE=1 SV=1;>tr|B4DEK7|B4DEK7_HUMAN Ras-related protein Rab-8A OS=Homo sapiens GN=RAB8A PE=1 SV=1;>sp|P59190|RAB15_HUMAN Ras-related protein Rab-15 OS=Homo sapiens GN=RAB15 PE=1 SV=1;	MULTI-MSMS		JACB153_3	MCF7 R10K8	540.33	2	536.324	1070.63	47855.8	-0.33675	0.21962	-0.11713	536.324	540.331	46.906	19.634	0.78755	46.906	46.659	47.447	0		0	0	0	0.0079208	1	17008	77.062	0	1	67.695	15.572	0
STVHEILCK	9	1	0	Acetyl (Protein N-term)	_(ac)STVHEILCK_			1	0	P07355-2;P07355;H0YN42;A6NMY6;H0YMU9;H0YMD0;H0YKS4;H0YNP5;H0YMM1;H0YMW4;H0YKX9;H0YMT9;H0YLV6;H0YKZ7;H0YKL9;H0YKV8;H0YMD9;H0YKN4;H0YNB8	P07355-2	P07355-2	ANXA2;ANXA2P2	Annexin A2;Annexin;Putative annexin A2-like protein	>sp|P07355-2|ANXA2_HUMAN Isoform 2 of Annexin A2 OS=Homo sapiens GN=ANXA2;>sp|P07355|ANXA2_HUMAN Annexin A2 OS=Homo sapiens GN=ANXA2 PE=1 SV=2;>tr|H0YN42|H0YN42_HUMAN Annexin (Fragment) OS=Homo sapiens GN=ANXA2 PE=1 SV=1;>sp|A6NMY6|AXA2L_HUMAN Putative ann	MULTI-MSMS		JACB153_3	MCF7 R10K8	568.8	2	564.79	1127.56	45466.6	-0.46855	-0.75804	-1.2266	564.789	568.796	34.267	15.425	0.52175	34.267	34.04	34.561	0		0	0	0	0.000448	2	11523	125.48	125.48	1	67.88	16.02	0
GIFPVLCK	8	1	0	Unmodified	_GIFPVLCK_			0	0	P14618;P14618-3;P14618-2;H3BTN5;Q504U3	P14618;P14618-2	P14618	PKM2	Pyruvate kinase isozymes M1/M2;Pyruvate kinase	>sp|P14618|KPYM_HUMAN Pyruvate kinase PKM OS=Homo sapiens GN=PKM PE=1 SV=4;>sp|P14618-3|KPYM_HUMAN Isoform 3 of Pyruvate kinase PKM OS=Homo sapiens GN=PKM;>sp|P14618-2|KPYM_HUMAN Isoform M1 of Pyruvate kinase PKM OS=Homo sapiens GN=PKM;>tr|H3BTN5|H3BTN5_HU	MULTI-MSMS		JACB153_3	MCF7 R10K8	471.27	2	467.265	932.515	50349.8	0.32302	0.039871	0.36289	467.265	471.272	49.938	20.647	0.83444	49.938	49.527	50.361	0		0	0	0	0.011754	2	18319	64.836	43.33	1	68.095	15.787	0
LGLSTLGELK	10	1	0	Unmodified	_LGLSTLGELK_			0	0	O43399-7;O43399-5;O43399;O43399-3;O43399-4;O43399-2;O43399-6	O43399-7	O43399-7	TPD52L2	Tumor protein D54	>sp|O43399-7|TPD54_HUMAN Isoform 7 of Tumor protein D54 OS=Homo sapiens GN=TPD52L2;>sp|O43399-5|TPD54_HUMAN Isoform 5 of Tumor protein D54 OS=Homo sapiens GN=TPD52L2;>sp|O43399|TPD54_HUMAN Tumor protein D54 OS=Homo sapiens GN=TPD52L2 PE=1 SV=2;>sp|O43399-3	MULTI-MSMS		JACB153_3	MCF7 R10K8	519.82	2	515.811	1029.61	48804.7	0.026426	0.49741	0.52384	515.812	519.818	48.108	20.037	0.53437	48.108	47.844	48.378	0		0	0	0	0.00072325	1	17525	129.16	93.33	1	68.199	20.181	0
VLITTDLLAR	10	0	1	Unmodified	_VLITTDLLAR_			0	0	P60842;Q14240-2;Q14240;E7EQG2;Q9NZE6	P60842;Q14240-2	P60842	EIF4A1;EIF4A2	Eukaryotic initiation factor 4A-I;Eukaryotic initiation factor 4A-II	>sp|P60842|IF4A1_HUMAN Eukaryotic initiation factor 4A-I OS=Homo sapiens GN=EIF4A1 PE=1 SV=1;>sp|Q14240-2|IF4A2_HUMAN Isoform 2 of Eukaryotic initiation factor 4A-II OS=Homo sapiens GN=EIF4A2;>sp|Q14240|IF4A2_HUMAN Eukaryotic initiation factor 4A-II OS=Hom	MULTI-MSMS		JACB153_3	MCF7 R10K8	562.85	2	557.845	1113.68	47125.1	0.13053	0.28475	0.41528	558.347	562.849	52.838	21.613	0.74066	52.838	52.609	53.349	0		0	0	0	0.00070544	1	19406	129.85	129.85	1	68.224	18.604	0
KLDTNSDGQLDFSEFLNLIGGLAMACHDSFLK	32	2	0	Unmodified	_KLDTNSDGQLDFSEFLNLIGGLAMACHDSFLK_			0	0	P31949	P31949	P31949	S100A11	Protein S100-A11	>sp|P31949|S10AB_HUMAN Protein S100-A11 OS=Homo sapiens GN=S100A11 PE=1 SV=2	MULTI-MSMS		JACB153_3	MCF7 R10K8	894.44	4	889.933	3555.7	37086.3	-0.58239	-0.2203	-0.8027	890.434	894.191	96.364	56.488	1.3469	96.364	95.889	97.236	-7.6294e-06		0	0	0	2.1241e-26	3	35103	197.13	197.13	1	68.242	117.56	0
EQVANSAFVER	11	0	1	Unmodified	_EQVANSAFVER_			0	0	P08238;Q58FF7	P08238	P08238	HSP90AB1;HSP90AB3P	Heat shock protein HSP 90-beta;Putative heat shock protein HSP 90-beta-3	>sp|P08238|HS90B_HUMAN Heat shock protein HSP 90-beta OS=Homo sapiens GN=HSP90AB1 PE=1 SV=4;>sp|Q58FF7|H90B3_HUMAN Putative heat shock protein HSP 90-beta-3 OS=Homo sapiens GN=HSP90AB3P PE=5 SV=1	MULTI-MSMS		JACB153_3	MCF7 R10K8	630.32	2	625.312	1248.61	42942.7	-0.48115	-0.22889	-0.71004	625.313	630.316	27.035	13.015	0.52894	27.035	26.787	27.316	-1.9073e-06		0	0	0	0.00016379	1	8354	145.91	145.91	1	68.497	17.32	0
LICCDILDVLDK	12	1	0	Unmodified	_LICCDILDVLDK_			0	0	P62258;P62258-2;K7EIT4	P62258	P62258	YWHAE	14-3-3 protein epsilon	>sp|P62258|1433E_HUMAN 14-3-3 protein epsilon OS=Homo sapiens GN=YWHAE PE=1 SV=1;>sp|P62258-2|1433E_HUMAN Isoform SV of 14-3-3 protein epsilon OS=Homo sapiens GN=YWHAE;>tr|K7EIT4|K7EIT4_HUMAN 14-3-3 protein epsilon (Fragment) OS=Homo sapiens GN=YWHAE PE=1	MULTI-MSMS		JACB153_3	MCF7 R10K8	742.88	2	738.875	1475.74	40216.9	-0.56537	-0.49682	-1.0622	738.876	742.883	68.627	26.873	0.79469	68.627	68.337	69.132	0		0	0	0	8.9487e-05	2	25362	133.32	133.32	1	68.582	16.852	0
TLTAVHDAILEDLVFPSEIVGK	22	1	0	Unmodified	_TLTAVHDAILEDLVFPSEIVGK_			0	0	P62081;B5MCP9	P62081	P62081	RPS7	40S ribosomal protein S7	>sp|P62081|RS7_HUMAN 40S ribosomal protein S7 OS=Homo sapiens GN=RPS7 PE=1 SV=1;>tr|B5MCP9|B5MCP9_HUMAN 40S ribosomal protein S7 OS=Homo sapiens GN=RPS7 PE=1 SV=1	MULTI-MSMS		JACB153_3	MCF7 R10K8	792.77	3	789.765	2366.27	39490	-0.19821	0.27809	0.079884	790.099	792.771	74.561	28.85	1.495	74.561	74.102	75.597	0		0	0	0	7.0196e-12	2	27541	136.68	136.68	1	68.632	19.961	0
DLATALEQLLQAYPR	15	0	1	Unmodified	_DLATALEQLLQAYPR_			0	0	P55957-2;P55957;P55957-4	P55957-2	P55957-2	BID	BH3-interacting domain death agonist;BH3-interacting domain death agonist p15;BH3-interacting domain death agonist p13;BH3-interacting domain death agonist p11	>sp|P55957-2|BID_HUMAN Isoform 2 of BH3-interacting domain death agonist OS=Homo sapiens GN=BID;>sp|P55957|BID_HUMAN BH3-interacting domain death agonist OS=Homo sapiens GN=BID PE=1 SV=1;>sp|P55957-4|BID_HUMAN Isoform 4 of BH3-interacting domain death agon	MULTI-MSMS		JACB153_3	MCF7 R10K8	571.31	3	567.977	1700.91	47593.8	0.12308	0.080195	0.20327	567.977	571.313	100.45	82.659	0.64346	100.45	100.15	100.8	-7.6294e-06		0	0	0	3.2436e-12	2	36478	204.13	192.11	1	68.774	31.087	0
TDYNASVSVPDSSGPER	17	0	1	Unmodified	_TDYNASVSVPDSSGPER_			0	0	P61978-3;Q5T6W5;Q5T6W2;P61978-2;P61978	P61978-3;P61978-2	P61978-2	HNRNPK	Heterogeneous nuclear ribonucleoprotein K	>sp|P61978-3|HNRPK_HUMAN Isoform 3 of Heterogeneous nuclear ribonucleoprotein K OS=Homo sapiens GN=HNRNPK;>tr|Q5T6W5|Q5T6W5_HUMAN Heterogeneous nuclear ribonucleoprotein K OS=Homo sapiens GN=HNRNPK PE=1 SV=1;>tr|Q5T6W2|Q5T6W2_HUMAN Heterogeneous nuclear ri	MULTI-MSMS		JACB153_3	MCF7 R10K8	895.91	2	890.903	1779.79	37328.6	-0.91277	-0.16844	-1.0812	891.404	895.907	32.35	14.784	0.49052	32.35	32.159	32.65	0		0	0	0	3.5809e-07	1	10693	120.99	116.59	1	69.367	19.695	0
WSLLQQQK	8	1	0	Unmodified	_WSLLQQQK_			0	0	P05787-2;CON__P05787;P05787;F8VUG2;CON__H-INV:HIT000292931;F8W1U3;CON__Q9H552;F8VP67;F8VRG4	P05787-2	P05787-2	KRT8	Keratin, type II cytoskeletal 8	>sp|P05787-2|K2C8_HUMAN Isoform 2 of Keratin, type II cytoskeletal 8 OS=Homo sapiens GN=KRT8;>P05787 SWISS-PROT:P05787 Tax_Id=9606 Gene_Symbol=KRT8 Keratin, type II cytoskeletal 8;>sp|P05787|K2C8_HUMAN Keratin, type II cytoskeletal 8 OS=Homo sapiens GN=KRT	MULTI-MSMS		JACB153_3	MCF7 R10K8	515.79	2	515.788	1029.56	48256.9	-0.3993	-0.89103	-1.2903	515.788	519.794	38.732	16.913	0.97022	38.732	38.364	39.334	0		0	0	0	0.0015137	3	13517	133.6	87.471	1	69.45	12.325	0
NDFQLIGIQDGYLSLLQDSGEVR	23	0	1	Unmodified	_NDFQLIGIQDGYLSLLQDSGEVR_			0	0	P63241-2;P63241;I3L504;I3L397	P63241-2	P63241-2	EIF5A	Eukaryotic translation initiation factor 5A-1	>sp|P63241-2|IF5A1_HUMAN Isoform 2 of Eukaryotic translation initiation factor 5A-1 OS=Homo sapiens GN=EIF5A;>sp|P63241|IF5A1_HUMAN Eukaryotic translation initiation factor 5A-1 OS=Homo sapiens GN=EIF5A PE=1 SV=2;>tr|I3L504|I3L504_HUMAN Eukaryotic translat	MULTI-MSMS		JACB153_3	MCF7 R10K8	864.44	3	860.77	2579.29	37639.6	-0.32484	-0.039266	-0.36411	861.441	864.44	84.047	32.018	0.94528	84.047	83.714	84.659	7.6294e-06		0	0	0	5.8588e-12	2	30838	144.22	144.22	1	69.56	24.406	0
AEAESMYQIK	10	1	0	Unmodified	_AEAESMYQIK_			0	0	P05787-2;CON__P05787;P05787;CON__H-INV:HIT000292931;CON__Q9H552	P05787-2	P05787-2	KRT8	Keratin, type II cytoskeletal 8	>sp|P05787-2|K2C8_HUMAN Isoform 2 of Keratin, type II cytoskeletal 8 OS=Homo sapiens GN=KRT8;>P05787 SWISS-PROT:P05787 Tax_Id=9606 Gene_Symbol=KRT8 Keratin, type II cytoskeletal 8;>sp|P05787|K2C8_HUMAN Keratin, type II cytoskeletal 8 OS=Homo sapiens GN=KRT	MULTI-MSMS		JACB153_3	MCF7 R10K8	589.29	2	585.279	1168.54	44769.8	0.02908	0.1504	0.17948	585.28	589.286	28.567	13.522	0.97999	28.567	28.233	29.213	0		0	0	0	0.00084531	3	8995	123.63	53.525	1	69.644	13.048	0
STFSTNYR	8	0	1	Unmodified	_STFSTNYR_			0	0	P05783;F8VZY9	P05783	P05783	KRT18	Keratin, type I cytoskeletal 18	>sp|P05783|K1C18_HUMAN Keratin, type I cytoskeletal 18 OS=Homo sapiens GN=KRT18 PE=1 SV=2;>tr|F8VZY9|F8VZY9_HUMAN Keratin, type I cytoskeletal 18 OS=Homo sapiens GN=KRT18 PE=1 SV=1	MULTI-MSMS		JACB153_3	MCF7 R10K8	493.23	2	488.23	974.446	49272.1	0.0084792	-0.037153	-0.028674	488.23	493.234	21.708	11.238	0.57903	21.708	21.404	21.983	0		0	0	0	0.0021088	1	6046	119.27	104.5	1	69.693	17.859	0
TLTLVDTGIGMTK	13	1	0	Unmodified	_TLTLVDTGIGMTK_			0	0	P08238;Q58FF8	P08238	P08238	HSP90AB1;HSP90AB2P	Heat shock protein HSP 90-beta;Putative heat shock protein HSP 90-beta 2	>sp|P08238|HS90B_HUMAN Heat shock protein HSP 90-beta OS=Homo sapiens GN=HSP90AB1 PE=1 SV=4;>sp|Q58FF8|H90B2_HUMAN Putative heat shock protein HSP 90-beta 2 OS=Homo sapiens GN=HSP90AB2P PE=1 SV=2	MULTI-MSMS		JACB153_3	MCF7 R10K8	679.38	2	675.371	1348.73	42817.7	-0.17082	-0.81618	-0.987	675.37	679.378	50.906	20.972	0.73918	50.906	50.479	51.218	0		0	0	0	2.7863e-05	1	18625	143.86	0	1	69.73	15.607	0
LGGSAVISLEGKPL	14	1	0	Unmodified	_LGGSAVISLEGKPL_			0	0	E9PK25;P23528;G3V1A4	E9PK25	E9PK25	CFL1	Cofilin-1	>tr|E9PK25|E9PK25_HUMAN Cofilin-1 OS=Homo sapiens GN=CFL1 PE=1 SV=1;>sp|P23528|COF1_HUMAN Cofilin-1 OS=Homo sapiens GN=CFL1 PE=1 SV=3;>tr|G3V1A4|G3V1A4_HUMAN Cofilin 1 (Non-muscle), isoform CRA_a OS=Homo sapiens GN=CFL1 PE=1 SV=1	MULTI-MSMS		JACB153_3	MCF7 R10K8	674.9	2	670.893	1339.77	43315	0.098728	-0.29294	-0.19422	670.894	674.9	50.157	20.721	1.4871	50.157	49.846	51.333	0		0	0	0	4.1703e-06	5	18288	154.1	143.46	1	69.818	13.541	0
LAMQEFMILPVGAANFR	17	0	1	Unmodified	_LAMQEFMILPVGAANFR_			0	0	P06733;P06733-2;K7EM90	P06733	P06733	ENO1	Alpha-enolase	>sp|P06733|ENOA_HUMAN Alpha-enolase OS=Homo sapiens GN=ENO1 PE=1 SV=2;>sp|P06733-2|ENOA_HUMAN Isoform MBP-1 of Alpha-enolase OS=Homo sapiens GN=ENO1;>tr|K7EM90|K7EM90_HUMAN Enolase (Fragment) OS=Homo sapiens GN=ENO1 PE=1 SV=1	MULTI-MSMS		JACB153_3	MCF7 R10K8	959.5	2	954.497	1906.98	35957.9	-0.38396	-0.18011	-0.56407	954.997	959.501	78.132	30.048	0.71013	78.132	77.82	78.53	0		0	0	0	1.9584e-07	2	28852	123.03	123.03	1	69.849	21.08	0
YLIANATNPESK	12	1	0	Unmodified	_YLIANATNPESK_			0	0	P27348;E9PG15	P27348	P27348	YWHAQ	14-3-3 protein theta	>sp|P27348|1433T_HUMAN 14-3-3 protein theta OS=Homo sapiens GN=YWHAQ PE=1 SV=1;>tr|E9PG15|E9PG15_HUMAN 14-3-3 protein theta (Fragment) OS=Homo sapiens GN=YWHAQ PE=1 SV=1	MULTI-MSMS		JACB153_3	MCF7 R10K8	664.85	2	660.843	1319.67	42943	-0.489	0.15482	-0.33419	661.343	664.85	29.917	13.97	0.53478	29.917	29.692	30.227	0		0	0	0	0.00010605	1	9624	128.85	111.18	1	70.207	19.11	0
VFDAIMNFK	9	1	0	Unmodified	_VFDAIMNFK_			0	0	P13639	P13639	P13639	EEF2	Elongation factor 2	>sp|P13639|EF2_HUMAN Elongation factor 2 OS=Homo sapiens GN=EEF2 PE=1 SV=4	MULTI-MSMS		JACB153_3	MCF7 R10K8	546.79	2	542.778	1083.54	46438.9	0.020747	0.68334	0.70409	542.779	546.786	54.981	22.325	0.71068	54.981	54.648	55.358	-3.8147e-06		0	0	0	0.00073032	2	20393	118.26	118.26	1	70.301	16.443	0
VFSGLVSTGLK	11	1	0	Unmodified	_VFSGLVSTGLK_			0	0	P13639	P13639	P13639	EEF2	Elongation factor 2	>sp|P13639|EF2_HUMAN Elongation factor 2 OS=Homo sapiens GN=EEF2 PE=1 SV=4	MULTI-MSMS		JACB153_3	MCF7 R10K8	558.33	2	554.324	1106.63	46632.2	0.63284	-0.20429	0.42855	554.324	558.331	43.661	18.557	0.86645	43.661	43.395	44.262	-3.8147e-06		0	0	0	0.00067758	2	15716	103.91	103.91	1	70.361	15.997	0
SALASVIMGLSPILGK	16	1	0	Unmodified	_SALASVIMGLSPILGK_			0	0	P30153;F5H3X9;B3KQV6	P30153	P30153	PPP2R1A	Serine/threonine-protein phosphatase 2A 65 kDa regulatory subunit A alpha isoform	>sp|P30153|2AAA_HUMAN Serine/threonine-protein phosphatase 2A 65 kDa regulatory subunit A alpha isoform OS=Homo sapiens GN=PPP2R1A PE=1 SV=4;>tr|F5H3X9|F5H3X9_HUMAN Serine/threonine-protein phosphatase 2A 65 kDa regulatory subunit A alpha isoform OS=Homo s	MULTI-MSMS		JACB153_3	MCF7 R10K8	782.96	2	778.958	1555.9	39742.5	-0.23243	-0.35878	-0.5912	778.958	782.965	79.823	30.607	0.50839	79.823	79.614	80.122	0		0	0	0	8.7871e-08	1	29357	140.84	140.84	1	70.39	25.9	0
FYPEDVAEELIQDITQK	17	1	0	Unmodified	_FYPEDVAEELIQDITQK_			0	0	P15311;E7EQR4	P15311	P15311	EZR	Ezrin	>sp|P15311|EZRI_HUMAN Ezrin OS=Homo sapiens GN=EZR PE=1 SV=4;>tr|E7EQR4|E7EQR4_HUMAN Ezrin OS=Homo sapiens GN=EZR PE=1 SV=2	MULTI-MSMS		JACB153_3	MCF7 R10K8	683.01	3	680.005	2036.99	42530.3	-0.071668	-0.20185	-0.27352	680.34	683.011	94.256	43.031	1.0114	94.256	93.795	94.807	0		0	0	0	4.6762e-10	2	34414	164.01	164.01	1	70.475	23.154	0
LVVLGSGGVGK	11	1	0	Unmodified	_LVVLGSGGVGK_			0	0	P61224;P61224-3;F5H7Y6;E7ESV4;P61224-2;P62834;P61224-4;F5GX62;F5H004;F5H6R7;F5GYB5;F5H500;F5H0B7;F5H491;F5GWU8;F5H077;F5GYH7;F5H4H0;F8WBC0	P61224	P61224	RAP1B;RAP1A	Ras-related protein Rap-1b;Ras-related protein Rap-1A	>sp|P61224|RAP1B_HUMAN Ras-related protein Rap-1b OS=Homo sapiens GN=RAP1B PE=1 SV=1;>sp|P61224-3|RAP1B_HUMAN Isoform 3 of Ras-related protein Rap-1b OS=Homo sapiens GN=RAP1B;>tr|F5H7Y6|F5H7Y6_HUMAN Ras-related protein Rap-1b OS=Homo sapiens GN=RAP1B PE=4	MULTI-MSMS		JACB153_3	MCF7 R10K8	497.31	2	493.306	984.597	50834	-0.32749	0.64167	0.31418	493.306	497.313	33.448	15.148	0.47846	33.448	33.308	33.786	0		0	0	0	0.00056194	1	11197	115.18	93.089	1	70.632	20.646	0
LLIHQSLAGGIIGVK	15	1	0	Unmodified	_LLIHQSLAGGIIGVK_			0	0	P61978-3;Q5T6W5;Q5T6W2;P61978-2;P61978;Q5T6W1	P61978-3;P61978-2	P61978-2	HNRNPK	Heterogeneous nuclear ribonucleoprotein K	>sp|P61978-3|HNRPK_HUMAN Isoform 3 of Heterogeneous nuclear ribonucleoprotein K OS=Homo sapiens GN=HNRNPK;>tr|Q5T6W5|Q5T6W5_HUMAN Heterogeneous nuclear ribonucleoprotein K OS=Homo sapiens GN=HNRNPK PE=1 SV=1;>tr|Q5T6W2|Q5T6W2_HUMAN Heterogeneous nuclear ri	MULTI-MSMS		JACB153_3	MCF7 R10K8	509.66	3	506.984	1517.93	49352.6	-0.48198	0.55593	0.073946	506.984	509.655	45.631	19.206	0.9645	45.631	45.359	46.323	0		0	0	0	3.1335e-07	1	16528	126.71	126.71	1	70.646	19.157	0
TGTITTFEHAHNMR	14	0	1	Unmodified	_TGTITTFEHAHNMR_			0	0	P13639	P13639	P13639	EEF2	Elongation factor 2	>sp|P13639|EF2_HUMAN Elongation factor 2 OS=Homo sapiens GN=EEF2 PE=1 SV=4	MULTI-MSMS		JACB153_3	MCF7 R10K8	407.2	4	404.697	1614.76	54554.8	-0.20717	-0.38163	-0.5888	404.697	407.199	21.103	11.039	0.43611	21.103	20.874	21.31	0		0	0	0	0.00018704	1	5778	93.348	93.348	1	70.842	23.007	0
TIIPLISQCTPK	12	1	0	Unmodified	_TIIPLISQCTPK_			0	0	P40926;E9PDB2;G3XAL0	P40926	P40926	MDH2	Malate dehydrogenase, mitochondrial;Malate dehydrogenase	>sp|P40926|MDHM_HUMAN Malate dehydrogenase, mitochondrial OS=Homo sapiens GN=MDH2 PE=1 SV=3;>tr|E9PDB2|E9PDB2_HUMAN Malate dehydrogenase, mitochondrial OS=Homo sapiens GN=MDH2 PE=1 SV=1;>tr|G3XAL0|G3XAL0_HUMAN Malate dehydrogenase OS=Homo sapiens GN=MDH2 P	MULTI-MSMS		JACB153_3	MCF7 R10K8	689.9	2	685.889	1369.76	42854.6	0.061293	-0.11149	-0.050198	685.89	689.896	49.975	20.656	0.86412	49.975	49.668	50.532	3.8147e-06		0	0	0	0.00019855	1	18267	114.72	114.72	1	70.947	18.871	0
GHLENNPALEK	11	1	0	Unmodified	_GHLENNPALEK_			0	0	P05388;Q8NHW5;F8VWS0;Q3B7A4;F8VU65;F8VW21;G3V210;F8VPE8;F8VRK7;F8VQY6;F8VZS0;F8VS58;F8VWV4	P05388	P05388	RPLP0;RPLP0P6	60S acidic ribosomal protein P0;60S acidic ribosomal protein P0-like	>sp|P05388|RLA0_HUMAN 60S acidic ribosomal protein P0 OS=Homo sapiens GN=RPLP0 PE=1 SV=1;>sp|Q8NHW5|RLA0L_HUMAN 60S acidic ribosomal protein P0-like OS=Homo sapiens GN=RPLP0P6 PE=5 SV=1;>tr|F8VWS0|F8VWS0_HUMAN 60S acidic ribosomal protein P0 OS=Homo sapien	MULTI-MSMS		JACB153_3	MCF7 R10K8	410.55	3	407.879	1220.61	55066.8	0.45275	-0.47225	-0.0195	407.878	410.55	15.353	9.1209	0.4219	15.353	15.146	15.568	9.5367e-07		0	0	0	0.0097952	1	3602	72.652	72.652	1	71.23	23.465	0
DLTDYLMK	8	1	0	Unmodified	_DLTDYLMK_			0	0	CON__P60712;P60709;Q562R1;P68032;P68133;P62736;P63267;Q5T8M7;P63267-2;P63261;I3L4N8;I3L1U9;I3L3I0	CON__P60712;P68032;P63261	CON__P60712	ACTB;ACTBL2;ACTC1;ACTA1;ACTA2;ACTG2;ACTG1	Actin, cytoplasmic 1;Actin, cytoplasmic 1, N-terminally processed;Beta-actin-like protein 2;Actin, alpha cardiac muscle 1;Actin, alpha skeletal muscle;Actin, aortic smooth muscle;Actin, gamma-enteric smooth muscle;Actin, cytoplasmic 2;Actin, cytoplasmic 2, N-terminally processed	>P60712 SWISS-PROT:P60712 (Bos taurus) Actin, cytoplasmic 1;>sp|P60709|ACTB_HUMAN Actin, cytoplasmic 1 OS=Homo sapiens GN=ACTB PE=1 SV=1;>sp|Q562R1|ACTBL_HUMAN Beta-actin-like protein 2 OS=Homo sapiens GN=ACTBL2 PE=1 SV=2;>sp|P68032|ACTC_HUMAN Actin, alpha	MULTI-MSMS		JACB153_3	MCF7 R10K8	499.75	2	499.747	997.479	48216.9	-0.34856	-0.47366	-0.82222	499.747	503.754	56.996	23.001	1.223	56.996	56.683	57.906	0		0	0	0	0.0091133	4	21084	73.248	35.521	1	71.292	12.793	0
DSNNLCLHFNPR	12	0	1	Unmodified	_DSNNLCLHFNPR_			0	0	P09382	P09382	P09382	LGALS1	Galectin-1	>sp|P09382|LEG1_HUMAN Galectin-1 OS=Homo sapiens GN=LGALS1 PE=1 SV=2	MULTI-MSMS		JACB153_3	MCF7 R10K8	499.57	3	496.233	1485.68	49346.8	-0.14029	0.22122	0.080933	496.234	499.57	35.512	15.838	0.56309	35.512	35.296	35.859	0		0	0	0	0.00027335	1	12093	104.79	102.37	1	71.323	19.084	0
VPSTEAEALASSLMGLFEK	19	1	0	Unmodified	_VPSTEAEALASSLMGLFEK_			0	0	E7EU23;P50395;Q5SX87;Q5SX86;Q5SX90;V9GYF8	E7EU23	E7EU23	GDI2	Rab GDP dissociation inhibitor beta	>tr|E7EU23|E7EU23_HUMAN Rab GDP dissociation inhibitor beta OS=Homo sapiens GN=GDI2 PE=1 SV=1;>sp|P50395|GDIB_HUMAN Rab GDP dissociation inhibitor beta OS=Homo sapiens GN=GDI2 PE=1 SV=2;>tr|Q5SX87|Q5SX87_HUMAN Rab GDP dissociation inhibitor beta (Fragment)	MULTI-MSMS		JACB153_3	MCF7 R10K8	663.34	3	660.671	1978.99	43113.9	-0.17988	-0.1123	-0.29218	661.006	663.677	90.941	34.312	0.88796	90.941	90.519	91.407	0		0	0	0	9.6494e-11	2	33300	128.99	128.99	1	71.339	23.319	0
LMVALAK	7	1	0	Unmodified	_LMVALAK_			0	0	P07355-2;P07355;H0YN42;A6NMY6;H0YMU9;H0YMD0;H0YM50;H0YKS4;H0YNP5;H0YL33;H0YN28;H0YNA0;H0YN52	P07355-2	P07355-2	ANXA2;ANXA2P2	Annexin A2;Annexin;Putative annexin A2-like protein	>sp|P07355-2|ANXA2_HUMAN Isoform 2 of Annexin A2 OS=Homo sapiens GN=ANXA2;>sp|P07355|ANXA2_HUMAN Annexin A2 OS=Homo sapiens GN=ANXA2 PE=1 SV=2;>tr|H0YN42|H0YN42_HUMAN Annexin (Fragment) OS=Homo sapiens GN=ANXA2 PE=1 SV=1;>sp|A6NMY6|AXA2L_HUMAN Putative ann	MULTI-MSMS		JACB153_3	MCF7 R10K8	377.24	2	373.236	744.457	56286.2	-0.3116	-0.97454	-1.2861	373.235	377.242	32.453	14.817	0.42427	32.453	32.297	32.722	0		0	0	0	0.014781	1	10734	75.311	49.753	1	71.494	18.883	0
GLAPDLPEDLYHLIK	15	1	0	Unmodified	_GLAPDLPEDLYHLIK_			0	0	P62277;J3KMX5	P62277	P62277	RPS13	40S ribosomal protein S13	>sp|P62277|RS13_HUMAN 40S ribosomal protein S13 OS=Homo sapiens GN=RPS13 PE=1 SV=2;>tr|J3KMX5|J3KMX5_HUMAN 40S ribosomal protein S13 OS=Homo sapiens GN=RPS13 PE=1 SV=1	MULTI-MSMS		JACB153_3	MCF7 R10K8	567.98	3	565.31	1692.91	46679.2	0.13204	0.23965	0.37168	565.644	567.982	66.247	26.081	0.82004	66.247	65.869	66.689	0		0	0	0	1.2441e-05	2	24590	110.98	110.98	1	71.521	17.288	0
SLAGSSGPGASSGTSGDHGELVVR	24	0	1	Unmodified	_SLAGSSGPGASSGTSGDHGELVVR_			0	0	E9PRY8;P29692-2;P29692;E9PK01;E9PI39;E9PQ49;E9PL12;E9PPR1;H0YCK7;E9PIZ1;E9PMW7	E9PRY8	E9PRY8	EEF1D	Elongation factor 1-delta	>tr|E9PRY8|E9PRY8_HUMAN Elongation factor 1-delta OS=Homo sapiens GN=EEF1D PE=1 SV=1;>sp|P29692-2|EF1D_HUMAN Isoform 2 of Elongation factor 1-delta OS=Homo sapiens GN=EEF1D;>sp|P29692|EF1D_HUMAN Elongation factor 1-delta OS=Homo sapiens GN=EEF1D PE=1 SV=5;	MULTI-MSMS		JACB153_3	MCF7 R10K8	732.69	3	729.021	2184.04	40253.8	-0.50373	-0.32935	-0.83308	729.356	732.691	26.798	12.93	0.70899	26.798	26.607	27.316	1.9073e-06		0	0	0	2.5805e-22	1	8238	201.32	201.32	1	71.695	19.817	0
SGETEDTFIADLVVGLCTGQIK	22	1	0	Unmodified	_SGETEDTFIADLVVGLCTGQIK_			0	0	P06733;P06733-2;P09104;B7Z2X9;F5H0C8;P13929;P13929-2;P13929-3	P06733;P09104	P06733	ENO1;ENO2;ENO3	Alpha-enolase;Gamma-enolase;Enolase;Beta-enolase	>sp|P06733|ENOA_HUMAN Alpha-enolase OS=Homo sapiens GN=ENO1 PE=1 SV=2;>sp|P06733-2|ENOA_HUMAN Isoform MBP-1 of Alpha-enolase OS=Homo sapiens GN=ENO1;>sp|P09104|ENOG_HUMAN Gamma-enolase OS=Homo sapiens GN=ENO2 PE=1 SV=3;>tr|B7Z2X9|B7Z2X9_HUMAN Gamma-enolase	MULTI-MSMS		JACB153_3	MCF7 R10K8	788.06	3	785.058	2352.15	39567.3	-0.38832	-0.08202	-0.47034	785.393	788.064	88.277	33.426	1.7093	88.277	87.888	89.597	0		0	0	0	1.6044e-21	4	32377	196.3	196.3	1	71.779	23.454	0
IQVLVEPDHFK	11	1	0	Unmodified	_IQVLVEPDHFK_			0	0	P17931	P17931	P17931	LGALS3	Galectin-3	>sp|P17931|LEG3_HUMAN Galectin-3 OS=Homo sapiens GN=LGALS3 PE=1 SV=5	MULTI-MSMS		JACB153_3	MCF7 R10K8	444.92	3	442.247	1323.72	52463.8	0.065004	-0.22518	-0.16018	442.247	444.918	37.482	16.494	0.66696	37.482	37.28	37.947	0		0	0	0	0.0012043	1	12995	92.866	92.866	1	71.819	18.065	0
LLEPVLLLGK	10	1	0	Unmodified	_LLEPVLLLGK_			0	0	P62249;M0R210;M0R3H0;Q6IPX4;M0R1M5;M0QX76	P62249	P62249	RPS16	40S ribosomal protein S16	>sp|P62249|RS16_HUMAN 40S ribosomal protein S16 OS=Homo sapiens GN=RPS16 PE=1 SV=2;>tr|M0R210|M0R210_HUMAN 40S ribosomal protein S16 OS=Homo sapiens GN=RPS16 PE=1 SV=1;>tr|M0R3H0|M0R3H0_HUMAN 40S ribosomal protein S16 OS=Homo sapiens GN=RPS16 PE=1 SV=1;>tr	MULTI-MSMS		JACB153_3	MCF7 R10K8	551.87	2	547.863	1093.71	47673.8	0.3905	-0.15143	0.23907	547.863	551.87	63.184	25.063	0.77714	63.184	62.915	63.692	0		0	0	0	0.00092371	2	23384	117.7	117.7	1	71.842	18.314	0
LLPQLTYLDGYDR	13	0	1	Unmodified	_LLPQLTYLDGYDR_			0	0	P39687;H0YN26;Q92688;Q92688-2;Q5T6W8	P39687;Q92688	P39687	ANP32A;ANP32B	Acidic leucine-rich nuclear phosphoprotein 32 family member A;Acidic leucine-rich nuclear phosphoprotein 32 family member B	>sp|P39687|AN32A_HUMAN Acidic leucine-rich nuclear phosphoprotein 32 family member A OS=Homo sapiens GN=ANP32A PE=1 SV=1;>tr|H0YN26|H0YN26_HUMAN Acidic leucine-rich nuclear phosphoprotein 32 family member A OS=Homo sapiens GN=ANP32A PE=1 SV=1;>sp|Q92688|AN	MULTI-MSMS		JACB153_3	MCF7 R10K8	788.91	2	783.912	1565.81	39288.5	-0.70671	0.58801	-0.1187	784.414	788.916	60.963	24.322	0.54049	60.963	60.752	61.292	0		0	0	0	5.348e-05	1	22570	131.32	110.9	1	71.891	20.988	0
SLLEGQEDHYNNLSASK	17	1	0	Unmodified	_SLLEGQEDHYNNLSASK_			0	0	CON__P08727;P08727	CON__P08727	CON__P08727	KRT19	Keratin, type I cytoskeletal 19	>P08727 SWISS-PROT:P08727 Tax_Id=9606 Gene_Symbol=KRT19 Keratin, type I cytoskeletal 19;>sp|P08727|K1C19_HUMAN Keratin, type I cytoskeletal 19 OS=Homo sapiens GN=KRT19 PE=1 SV=4	MULTI-MSMS		JACB153_3	MCF7 R10K8	638.64	3	635.638	1903.89	43651.8	-0.45905	0.3049	-0.15415	635.973	638.31	30.566	14.192	0.95693	30.566	30.271	31.228	0		0	0	0	4.3352e-10	2	9885	165.75	150.36	1	71.981	13.496	0
ALEAANGELEVK	12	1	0	Unmodified	_ALEAANGELEVK_			0	0	CON__P08727;P08727	CON__P08727	CON__P08727	KRT19	Keratin, type I cytoskeletal 19	>P08727 SWISS-PROT:P08727 Tax_Id=9606 Gene_Symbol=KRT19 Keratin, type I cytoskeletal 19;>sp|P08727|K1C19_HUMAN Keratin, type I cytoskeletal 19 OS=Homo sapiens GN=KRT19 PE=1 SV=4	MULTI-MSMS		JACB153_3	MCF7 R10K8	626.34	2	622.33	1242.65	44405.8	-0.26563	-0.31589	-0.58152	622.33	626.337	31.74	14.582	0.42442	31.74	31.543	31.967	1.9073e-06		0	0	0	1.8691e-06	1	10453	171.05	18.199	1	72.056	16.658	0
NLQYYDISAK	10	1	0	Unmodified	_NLQYYDISAK_			0	0	B5MDF5;P62826;J3KQE5;F5H018;B4DV51	B5MDF5	B5MDF5	RAN	GTP-binding nuclear protein Ran	>tr|B5MDF5|B5MDF5_HUMAN GTP-binding nuclear protein Ran OS=Homo sapiens GN=RAN PE=1 SV=1;>sp|P62826|RAN_HUMAN GTP-binding nuclear protein Ran OS=Homo sapiens GN=RAN PE=1 SV=3;>tr|J3KQE5|J3KQE5_HUMAN GTP-binding nuclear protein Ran (Fragment) OS=Homo sapien	MULTI-MSMS		JACB153_3	MCF7 R10K8	611.81	2	607.806	1213.6	44830.3	-0.099038	-1.2759	-1.375	607.805	611.813	36.388	16.127	0.87802	36.388	35.859	36.737	0		0	0	0	0.0011635	1	12612	99.568	99.568	1	72.169	17.295	0
VIDDTNITR	9	0	1	Unmodified	_VIDDTNITR_			0	0	P05783;F8VZY9	P05783	P05783	KRT18	Keratin, type I cytoskeletal 18	>sp|P05783|K1C18_HUMAN Keratin, type I cytoskeletal 18 OS=Homo sapiens GN=KRT18 PE=1 SV=2;>tr|F8VZY9|F8VZY9_HUMAN Keratin, type I cytoskeletal 18 OS=Homo sapiens GN=KRT18 PE=1 SV=1	MULTI-MSMS		JACB153_3	MCF7 R10K8	528.78	2	523.777	1045.54	48386.5	-0.19585	0.42598	0.23013	523.778	528.782	23.81	11.937	0.63185	23.81	23.623	24.255	1.9073e-06		0	0	0	0.00072347	1	6921	118.71	67.366	1	72.608	18.723	0
SLDMDSIIAEVK	12	1	0	Unmodified	_SLDMDSIIAEVK_			0	0	P05787-2;CON__P05787;P05787;F8VUG2;CON__H-INV:HIT000292931;CON__H-INV:HIT000016045	P05787-2	P05787-2	KRT8	Keratin, type II cytoskeletal 8	>sp|P05787-2|K2C8_HUMAN Isoform 2 of Keratin, type II cytoskeletal 8 OS=Homo sapiens GN=KRT8;>P05787 SWISS-PROT:P05787 Tax_Id=9606 Gene_Symbol=KRT8 Keratin, type II cytoskeletal 8;>sp|P05787|K2C8_HUMAN Keratin, type II cytoskeletal 8 OS=Homo sapiens GN=KRT	MULTI-MSMS		JACB153_3	MCF7 R10K8	664.85	2	660.839	1319.66	41937.2	-0.27531	-0.85773	-1.133	660.84	664.846	62.637	24.88	1.4266	62.637	62.266	63.692	0		0	0	0	0.00011082	4	23158	127.56	127.56	1	72.644	12.34	0
TLVLLMGK	8	1	0	Unmodified	_TLVLLMGK_			0	0	P07737;K7EJ44;CON__P02584	P07737	P07737	PFN1	Profilin-1	>sp|P07737|PROF1_HUMAN Profilin-1 OS=Homo sapiens GN=PFN1 PE=1 SV=2;>tr|K7EJ44|K7EJ44_HUMAN Profilin 1, isoform CRA_b OS=Homo sapiens GN=PFN1 PE=1 SV=1;>P02584 SWISS-PROT:P02584 (Bos taurus) Profilin-1	MULTI-MSMS		JACB153_3	MCF7 R10K8	441.78	2	437.775	873.536	52164.4	-0.51576	-0.046274	-0.56204	437.775	441.782	47.722	19.911	1.0931	47.722	47.487	48.58	0		0	0	0	0.0091096	3	17630	73.26	73.26	1	72.746	19.232	0
IGYNPATVPFVPISGWHGDNMLEPSPNMPWFK	32	1	0	Unmodified	_IGYNPATVPFVPISGWHGDNMLEPSPNMPWFK_			0	0	Q05639	Q05639	Q05639	EEF1A2	Elongation factor 1-alpha 2	>sp|Q05639|EF1A2_HUMAN Elongation factor 1-alpha 2 OS=Homo sapiens GN=EEF1A2 PE=1 SV=1	MULTI-MSMS		JACB153_3	MCF7 R10K8	1203.59	3	1200.25	3597.72	32031.8	-0.38424	-0.18736	-0.5716	1200.92	1203.59	80.493	30.833	0.8641	80.493	80.233	81.097	0		0	0	0	2.3398e-07	2	29698	97.771	97.771	1	72.827	18.746	0
SGVSLAALK	9	1	0	Unmodified	_SGVSLAALK_			0	0	P16402;P10412;P16403	P16402;P10412;P16403	P16402	HIST1H1D;HIST1H1E;HIST1H1C	Histone H1.3;Histone H1.4;Histone H1.2	>sp|P16402|H13_HUMAN Histone H1.3 OS=Homo sapiens GN=HIST1H1D PE=1 SV=2;>sp|P10412|H14_HUMAN Histone H1.4 OS=Homo sapiens GN=HIST1H1E PE=1 SV=2;>sp|P16403|H12_HUMAN Histone H1.2 OS=Homo sapiens GN=HIST1H1C PE=1 SV=2	MULTI-MSMS		JACB153_3	MCF7 R10K8	427.27	2	423.258	844.502	53240.8	-0.49012	-0.012517	-0.50263	423.258	427.265	33.579	15.194	0.56426	33.579	33.374	33.938	-3.8147e-06		0	0	0	0.0064585	1	11235	75.294	45.485	1	72.827	17.03	0
LNFSHGTHEYHAETIK	16	1	0	Unmodified	_LNFSHGTHEYHAETIK_			0	0	P14618;H3BQ34;H3BTJ2;H3BUW1;H3BT25;P14618-2;H3BTN5	P14618;P14618-2	P14618	PKM2	Pyruvate kinase isozymes M1/M2;Pyruvate kinase	>sp|P14618|KPYM_HUMAN Pyruvate kinase PKM OS=Homo sapiens GN=PKM PE=1 SV=4;>tr|H3BQ34|H3BQ34_HUMAN Pyruvate kinase OS=Homo sapiens GN=PKM PE=1 SV=1;>tr|H3BTJ2|H3BTJ2_HUMAN Pyruvate kinase PKM (Fragment) OS=Homo sapiens GN=PKM PE=1 SV=1;>tr|H3BUW1|H3BUW1_HU	MULTI-MSMS		JACB153_3	MCF7 R10K8	379.39	5	377.587	1882.9	56073.9	-0.073982	0.1022	0.02822	377.788	379.19	19.452	10.482	0.68904	19.452	19.206	19.895	0		0	0	0	0.00012519	1	5117	92.773	92.773	1	73.122	17.192	0
HLMLPDFDLLEDIESK	16	1	0	Unmodified	_HLMLPDFDLLEDIESK_			0	0	P13010;C9JZ81	P13010	P13010	XRCC5	X-ray repair cross-complementing protein 5	>sp|P13010|XRCC5_HUMAN X-ray repair cross-complementing protein 5 OS=Homo sapiens GN=XRCC5 PE=1 SV=3;>tr|C9JZ81|C9JZ81_HUMAN X-ray repair cross-complementing protein 5 (Fragment) OS=Homo sapiens GN=XRCC5 PE=1 SV=1	MULTI-MSMS		JACB153_3	MCF7 R10K8	641.66	3	638.989	1913.94	43153.1	-0.083583	0.27798	0.1944	639.323	641.995	75.642	29.215	0.68214	75.642	75.324	76.006	0		0	0	0	9.3575e-06	2	27975	104.95	101.09	1	73.176	22.385	0
TFCQLILDPIFK	12	1	0	Unmodified	_TFCQLILDPIFK_			0	0	P13639	P13639	P13639	EEF2	Elongation factor 2	>sp|P13639|EF2_HUMAN Elongation factor 2 OS=Homo sapiens GN=EEF2 PE=1 SV=4	MULTI-MSMS		JACB153_3	MCF7 R10K8	751.91	2	747.905	1493.8	40793.1	-0.064989	-0.37962	-0.44461	747.905	751.912	73.057	28.349	1.7779	73.057	72.714	74.492	0		0	0	0	2.9307e-06	3	27034	161.48	161.48	1	73.343	18.016	0
LLGLLFPLLAR	11	0	1	Unmodified	_LLGLLFPLLAR_			0	0	Q8TEX9-2;Q8TEX9;H0YMR4;H0YN07	Q8TEX9-2	Q8TEX9-2	IPO4	Importin-4	>sp|Q8TEX9-2|IPO4_HUMAN Isoform 2 of Importin-4 OS=Homo sapiens GN=IPO4;>sp|Q8TEX9|IPO4_HUMAN Importin-4 OS=Homo sapiens GN=IPO4 PE=1 SV=2;>tr|H0YMR4|H0YMR4_HUMAN Importin-4 (Fragment) OS=Homo sapiens GN=IPO4 PE=1 SV=1;>tr|H0YN07|H0YN07_HUMAN Importin-4 (F	MULTI-MSMS		JACB153_3	MCF7 R10K8	618.41	2	613.405	1224.8	44815.6	0.32547	-0.15081	0.17466	613.405	618.409	86.752	32.919	0.74976	86.752	86.42	87.17	0		0	0	0	0.004387	2	31883	85.377	85.377	1	73.449	36.075	0
LLEVQGSRPGK	11	1	1	Unmodified	_LLEVQGSRPGK_			0	0	P62136;E9PMD7	P62136	P62136	PPP1CA	Serine/threonine-protein phosphatase PP1-alpha catalytic subunit;Serine/threonine-protein phosphatase	>sp|P62136|PP1A_HUMAN Serine/threonine-protein phosphatase PP1-alpha catalytic subunit OS=Homo sapiens GN=PPP1CA PE=1 SV=1;>tr|E9PMD7|E9PMD7_HUMAN Serine/threonine-protein phosphatase PP1-alpha catalytic subunit (Fragment) OS=Homo sapiens GN=PPP1CA PE=1 SV	MULTI-MSMS		JACB153_3	MCF7 R10K8	401.24	3	395.231	1182.67	53720.2	0.02524	2.3608	2.386	395.566	401.24	18.698	10.235	0.59913	18.698	18.509	19.108	0		0	0	0	0.015168	1	4826	80.979	50.107	1	73.472	92.405	0
AGITTIEAVK	10	1	0	Acetyl (Protein N-term)	_(ac)AGITTIEAVK_			1	0	P06753-2;Q5VU59;P06753-5;P06753-6;P06753-3;Q5VU61;P06753-4;D6R904;D6RFM2	P06753-2	P06753-2	TPM3		>sp|P06753-2|TPM3_HUMAN Isoform 2 of Tropomyosin alpha-3 chain OS=Homo sapiens GN=TPM3;>tr|Q5VU59|Q5VU59_HUMAN Uncharacterized protein OS=Homo sapiens GN=TPM3 PE=1 SV=1;>sp|P06753-5|TPM3_HUMAN Isoform 5 of Tropomyosin alpha-3 chain OS=Homo sapiens GN=TPM3;	MULTI-MSMS		JACB153_3	MCF7 R10K8	526.81	2	522.8	1043.59	48560.9	0.10637	0.15345	0.25982	522.801	526.808	52.689	21.559	0.53787	52.689	52.484	53.022	0		0	0	0	0.0025747	1	19352	85.958	52.729	1	73.591	17.995	0
IIVENLFYPVTLDVLHQIFSK	21	1	0	Unmodified	_IIVENLFYPVTLDVLHQIFSK_			0	0	P26599-3;P26599-2;P26599;K7ES59;K7EKJ7;K7EK45	P26599-3	P26599-3	PTBP1	Polypyrimidine tract-binding protein 1	>sp|P26599-3|PTBP1_HUMAN Isoform 3 of Polypyrimidine tract-binding protein 1 OS=Homo sapiens GN=PTBP1;>sp|P26599-2|PTBP1_HUMAN Isoform 2 of Polypyrimidine tract-binding protein 1 OS=Homo sapiens GN=PTBP1;>sp|P26599|PTBP1_HUMAN Polypyrimidine tract-binding	MULTI-MSMS		JACB153_3	MCF7 R10K8	833.14	3	830.133	2487.38	38779.5	-0.45437	-0.0082046	-0.46258	830.468	833.139	97.973	66.811	1.1346	97.973	97.565	98.699	0		0	0	0	4.7738e-19	4	35635	185.61	185.61	1	73.611	24.144	0
ETSGNLEQLLLAVVK	15	1	0	Unmodified	_ETSGNLEQLLLAVVK_			0	0	P08758;D6RBL5;D6RBE9	P08758	P08758	ANXA5	Annexin A5;Annexin	>sp|P08758|ANXA5_HUMAN Annexin A5 OS=Homo sapiens GN=ANXA5 PE=1 SV=2;>tr|D6RBL5|D6RBL5_HUMAN Annexin OS=Homo sapiens GN=ANXA5 PE=1 SV=1;>tr|D6RBE9|D6RBE9_HUMAN Annexin OS=Homo sapiens GN=ANXA5 PE=1 SV=1	MULTI-MSMS		JACB153_3	MCF7 R10K8	811.47	2	807.459	1612.9	39189.9	-0.16388	-0.16816	-0.33205	807.459	811.466	81.092	31.028	0.71773	81.092	80.781	81.499	0		0	0	0	3.6457e-06	1	29813	121.31	121.31	1	73.659	24.534	0
IGGIGTVPVGR	11	0	1	Unmodified	_IGGIGTVPVGR_			0	0	Q05639;P68104;Q5VTE0	Q05639;P68104	P68104	EEF1A2;EEF1A1;EEF1A1P5	Elongation factor 1-alpha 2;Elongation factor 1-alpha 1;Putative elongation factor 1-alpha-like 3	>sp|Q05639|EF1A2_HUMAN Elongation factor 1-alpha 2 OS=Homo sapiens GN=EEF1A2 PE=1 SV=1;>sp|P68104|EF1A1_HUMAN Elongation factor 1-alpha 1 OS=Homo sapiens GN=EEF1A1 PE=1 SV=1;>sp|Q5VTE0|EF1A3_HUMAN Putative elongation factor 1-alpha-like 3 OS=Homo sapiens G	MULTI-MSMS		JACB153_3	MCF7 R10K8	518.31	2	513.309	1024.6	48812.2	-0.068889	-1.481	-1.5499	513.309	518.312	34.8	15.6	1.2778	34.8	34.581	35.859	0		0	0	0	0.00074097	3	11914	97.734	61.493	1	73.755	12.873	0
FLIPNASQAESK	12	1	0	Unmodified	_FLIPNASQAESK_			0	0	P63104;E7EX29;B0AZS6;P63104-2;E7ESK7	P63104	P63104	YWHAZ	14-3-3 protein zeta/delta	>sp|P63104|1433Z_HUMAN 14-3-3 protein zeta/delta OS=Homo sapiens GN=YWHAZ PE=1 SV=1;>tr|E7EX29|E7EX29_HUMAN 14-3-3 protein zeta/delta (Fragment) OS=Homo sapiens GN=YWHAZ PE=1 SV=1;>tr|B0AZS6|B0AZS6_HUMAN 14-3-3 protein zeta/delta OS=Homo sapiens GN=YWHAZ P	MULTI-MSMS		JACB153_3	MCF7 R10K8	656.85	2	652.846	1303.68	43598	-1.0338	0.021355	-1.0124	652.846	656.853	38.532	16.845	0.90815	38.532	38.249	39.157	0		0	0	0	0.00025541	3	13539	107.18	106.66	1	74.126	15.049	0
GGNFGFGDSR	10	0	1	Unmodified	_GGNFGFGDSR_			0	0	P22626;P22626-2	P22626	P22626	HNRNPA2B1	Heterogeneous nuclear ribonucleoproteins A2/B1	>sp|P22626|ROA2_HUMAN Heterogeneous nuclear ribonucleoproteins A2/B1 OS=Homo sapiens GN=HNRNPA2B1 PE=1 SV=2;>sp|P22626-2|ROA2_HUMAN Isoform A2 of Heterogeneous nuclear ribonucleoproteins A2/B1 OS=Homo sapiens GN=HNRNPA2B1	MULTI-MSMS		JACB153_3	MCF7 R10K8	512.23	2	507.225	1012.44	49027.4	0.3134	0.043837	0.35723	507.225	512.23	29.687	13.894	0.48119	29.687	29.468	29.949	-1.9073e-06		0	0	0	0.036881	1	9524	57.836	54.191	1	74.184	21.146	0
AVTEQGAELSNEER	14	0	1	Unmodified	_AVTEQGAELSNEER_			0	0	P27348;E9PG15	P27348	P27348	YWHAQ	14-3-3 protein theta	>sp|P27348|1433T_HUMAN 14-3-3 protein theta OS=Homo sapiens GN=YWHAQ PE=1 SV=1;>tr|E9PG15|E9PG15_HUMAN 14-3-3 protein theta (Fragment) OS=Homo sapiens GN=YWHAQ PE=1 SV=1	MULTI-MSMS		JACB153_3	MCF7 R10K8	771.87	2	766.863	1531.71	40167.7	-0.43786	-0.18448	-0.62234	766.862	771.867	22.343	11.448	0.57877	22.343	22.116	22.695	0		0	0	0	6.9274e-16	3	6420	242.79	242.79	1	74.366	24.715	0
LVLVGDGGTGK	11	1	0	Unmodified	_LVLVGDGGTGK_			0	0	B5MDF5;P62826;J3KQE5;F5H018;H0YFC6	B5MDF5	B5MDF5	RAN	GTP-binding nuclear protein Ran	>tr|B5MDF5|B5MDF5_HUMAN GTP-binding nuclear protein Ran OS=Homo sapiens GN=RAN PE=1 SV=1;>sp|P62826|RAN_HUMAN GTP-binding nuclear protein Ran OS=Homo sapiens GN=RAN PE=1 SV=3;>tr|J3KQE5|J3KQE5_HUMAN GTP-binding nuclear protein Ran (Fragment) OS=Homo sapien	MULTI-MSMS		JACB153_3	MCF7 R10K8	512.3	2	508.293	1014.57	48744.2	0.14329	0.64011	0.7834	508.294	512.3	30.673	14.226	0.57169	30.673	30.47	31.042	-1.9073e-06		0	0	0	0.00059325	2	9954	112.13	39.473	1	74.435	16.725	0
LNFSHGTHEYHAETIK	16	1	0	Unmodified	_LNFSHGTHEYHAETIK_			0	0	P14618;H3BQ34;H3BTJ2;H3BUW1;H3BT25;P14618-2;H3BTN5	P14618;P14618-2	P14618	PKM2	Pyruvate kinase isozymes M1/M2;Pyruvate kinase	>sp|P14618|KPYM_HUMAN Pyruvate kinase PKM OS=Homo sapiens GN=PKM PE=1 SV=4;>tr|H3BQ34|H3BQ34_HUMAN Pyruvate kinase OS=Homo sapiens GN=PKM PE=1 SV=1;>tr|H3BTJ2|H3BTJ2_HUMAN Pyruvate kinase PKM (Fragment) OS=Homo sapiens GN=PKM PE=1 SV=1;>tr|H3BUW1|H3BUW1_HU	MULTI-MSMS		JACB153_3	MCF7 R10K8	473.73	4	471.731	1882.9	50284.6	0.02009	0.04497	0.06506	471.983	473.735	19.453	10.482	0.63639	19.453	19.283	19.919	0		0	0	0	4.9697e-06	1	5128	114.63	105.05	1	74.444	17.566	0
IIAPPER	7	0	1	Unmodified	_IIAPPER_			0	0	CON__P60712;P60709;Q562R1;P68032;P68133;P62736;P63267;A6NL76;Q5T8M8;Q5T8M7;P63267-2;P63261	CON__P60712;P68032;P63261	CON__P60712	ACTB;ACTBL2;ACTC1;ACTA1;ACTA2;ACTG2;ACTG1	Actin, cytoplasmic 1;Actin, cytoplasmic 1, N-terminally processed;Beta-actin-like protein 2;Actin, alpha cardiac muscle 1;Actin, alpha skeletal muscle;Actin, aortic smooth muscle;Actin, gamma-enteric smooth muscle;Actin, cytoplasmic 2;Actin, cytoplasmic 2, N-terminally processed	>P60712 SWISS-PROT:P60712 (Bos taurus) Actin, cytoplasmic 1;>sp|P60709|ACTB_HUMAN Actin, cytoplasmic 1 OS=Homo sapiens GN=ACTB PE=1 SV=1;>sp|Q562R1|ACTBL_HUMAN Beta-actin-like protein 2 OS=Homo sapiens GN=ACTBL2 PE=1 SV=2;>sp|P68032|ACTC_HUMAN Actin, alpha	MULTI-MSMS		JACB153_3	MCF7 R10K8	398.24	2	398.24	794.465	54394.5	0.036775	0.00020647	0.036981	398.24	403.244	21.954	11.319	0.81954	21.954	21.792	22.612	0		0	0	0	0.0068382	3	6160	110.61	37.573	1	74.837	14.522	0
EPFGTEGR	8	0	1	Unmodified	_EPFGTEGR_			0	0	P11413-2;P11413-3;P11413;E7EUI8;E7EM57;E9PD92	P11413-2	P11413-2	G6PD	Glucose-6-phosphate 1-dehydrogenase	>sp|P11413-2|G6PD_HUMAN Isoform Long of Glucose-6-phosphate 1-dehydrogenase OS=Homo sapiens GN=G6PD;>sp|P11413-3|G6PD_HUMAN Isoform 3 of Glucose-6-phosphate 1-dehydrogenase OS=Homo sapiens GN=G6PD;>sp|P11413|G6PD_HUMAN Glucose-6-phosphate 1-dehydrogenase O	MULTI-MSMS		JACB153_3	MCF7 R10K8	451.72	2	446.712	891.409	51476.9	-0.13464	0.28692	0.15228	446.712	451.716	20.175	10.726	0.63461	20.175	19.952	20.586	0		0	0	0	0.0026316	1	5401	94.302	75.763	1	74.838	24.366	0
VPFDAATLHTSTAMAAQHGMDDDGTGQK	28	1	0	Unmodified	_VPFDAATLHTSTAMAAQHGMDDDGTGQK_			0	0	P06396;P06396-3;P06396-4;P06396-2;Q5T0H9	P06396	P06396	GSN	Gelsolin	>sp|P06396|GELS_HUMAN Gelsolin OS=Homo sapiens GN=GSN PE=1 SV=1;>sp|P06396-3|GELS_HUMAN Isoform 3 of Gelsolin OS=Homo sapiens GN=GSN;>sp|P06396-4|GELS_HUMAN Isoform 4 of Gelsolin OS=Homo sapiens GN=GSN;>sp|P06396-2|GELS_HUMAN Isoform 2 of Gelsolin OS=Homo	MULTI-MSMS		JACB153_3	MCF7 R10K8	721.33	4	719.076	2872.28	40906.7	-1.0058	-0.23451	-1.2403	719.577	721.331	38.928	16.974	0.43947	38.928	38.81	39.25	0		0	0	0	9.3507e-41	1	13623	281.23	281.23	1	74.885	18.235	0
TVTNAVVTVPAYFNDSQR	18	0	1	Unmodified	_TVTNAVVTVPAYFNDSQR_			0	0	P11142;P11142-2;E9PN89;E9PLF4;E9PQK7;E9PQQ4;E9PI65;E9PK54	P11142;E9PK54	P11142	HSPA8	Heat shock cognate 71 kDa protein	>sp|P11142|HSP7C_HUMAN Heat shock cognate 71 kDa protein OS=Homo sapiens GN=HSPA8 PE=1 SV=1;>sp|P11142-2|HSP7C_HUMAN Isoform 2 of Heat shock cognate 71 kDa protein OS=Homo sapiens GN=HSPA8;>tr|E9PN89|E9PN89_HUMAN Heat shock cognate 71 kDa protein (Fragment	MULTI-MSMS		JACB153_3	MCF7 R10K8	997.01	2	991.503	1980.99	35845.1	-0.9988	0.13745	-0.86135	992.003	996.507	52.301	21.436	0.77847	52.301	51.964	52.742	3.8147e-06		0	0	0	6.322e-16	2	19303	194.37	194.37	1	74.965	22.787	0
VIGSGCNLDSAR	12	0	1	Unmodified	_VIGSGCNLDSAR_			0	0	P00338-3;P00338;P00338-4;P00338-2;P00338-5;Q6ZMR3;P07864;F5H245;G3XAP5;F5H155;F5H5G7;P07195;A8MW50	P00338-3;P07195	P00338-3	LDHA;LDHAL6A;LDHC;LDHB	L-lactate dehydrogenase A chain;L-lactate dehydrogenase A-like 6A;L-lactate dehydrogenase C chain;L-lactate dehydrogenase;L-lactate dehydrogenase B chain	>sp|P00338-3|LDHA_HUMAN Isoform 3 of L-lactate dehydrogenase A chain OS=Homo sapiens GN=LDHA;>sp|P00338|LDHA_HUMAN L-lactate dehydrogenase A chain OS=Homo sapiens GN=LDHA PE=1 SV=2;>sp|P00338-4|LDHA_HUMAN Isoform 4 of L-lactate dehydrogenase A chain OS=Hom	MULTI-MSMS		JACB153_3	MCF7 R10K8	629.81	2	624.804	1247.59	44138.5	-0.34087	-0.16872	-0.50959	624.803	629.808	23.316	11.77	0.42836	23.316	23.12	23.548	0		0	0	0	0.00011225	1	6697	127.17	86.585	1	75.017	19.276	0
EITALAPSTMK	11	1	0	Unmodified	_EITALAPSTMK_			0	0	CON__P60712;P60709;P68032;P68133;P62736;P63267;A6NL76;Q5T8M8;Q5T8M7;P63267-2;P63261	CON__P60712;P68032;P63261	CON__P60712	ACTB;ACTC1;ACTA1;ACTA2;ACTG2;ACTG1	Actin, cytoplasmic 1;Actin, cytoplasmic 1, N-terminally processed;Actin, alpha cardiac muscle 1;Actin, alpha skeletal muscle;Actin, aortic smooth muscle;Actin, gamma-enteric smooth muscle;Actin, cytoplasmic 2;Actin, cytoplasmic 2, N-terminally processed	>P60712 SWISS-PROT:P60712 (Bos taurus) Actin, cytoplasmic 1;>sp|P60709|ACTB_HUMAN Actin, cytoplasmic 1 OS=Homo sapiens GN=ACTB PE=1 SV=1;>sp|P68032|ACTC_HUMAN Actin, alpha cardiac muscle 1 OS=Homo sapiens GN=ACTC1 PE=1 SV=1;>sp|P68133|ACTS_HUMAN Actin, alp	MULTI-MSMS		JACB153_3	MCF7 R10K8	585.32	2	581.313	1160.61	46060.4	-0.43335	0.036884	-0.39647	581.314	585.32	35.437	15.809	0.75928	35.437	35.217	35.977	0		0	0	0	0.00056515	3	12047	114.86	72.145	1	75.054	12.767	0
IGFPWSEIR	9	0	1	Unmodified	_IGFPWSEIR_			0	0	P26038;P15311;E7EQR4;P35241-5;P35241;P35241-4	P26038;P15311;P35241-5	P26038	MSN;EZR;RDX	Moesin;Ezrin;Radixin	>sp|P26038|MOES_HUMAN Moesin OS=Homo sapiens GN=MSN PE=1 SV=3;>sp|P15311|EZRI_HUMAN Ezrin OS=Homo sapiens GN=EZR PE=1 SV=4;>tr|E7EQR4|E7EQR4_HUMAN Ezrin OS=Homo sapiens GN=EZR PE=1 SV=2;>sp|P35241-5|RADI_HUMAN Isoform 5 of Radixin OS=Homo sapiens GN=RDX;>s	MULTI-MSMS		JACB153_3	MCF7 R10K8	557.8	2	552.795	1103.58	46479.2	0.3585	-0.57958	-0.22108	552.795	557.799	59.408	23.801	1.0028	59.408	58.97	59.973	3.8147e-06		0	0	0	0.004903	1	22053	80.688	57.771	1	75.541	22.701	0
NIEDVIAQGIGK	12	1	0	Unmodified	_NIEDVIAQGIGK_			0	0	P05387;H0YDD8	P05387	P05387	RPLP2	60S acidic ribosomal protein P2	>sp|P05387|RLA2_HUMAN 60S acidic ribosomal protein P2 OS=Homo sapiens GN=RPLP2 PE=1 SV=1;>tr|H0YDD8|H0YDD8_HUMAN 60S acidic ribosomal protein P2 (Fragment) OS=Homo sapiens GN=RPLP2 PE=1 SV=1	MULTI-MSMS		JACB153_3	MCF7 R10K8	632.85	2	628.846	1255.68	43784.1	-0.46512	0.64069	0.17557	628.846	632.853	54.619	22.202	0.56281	54.619	54.319	54.882	0		0	0	0	0.00016813	1	20115	118.76	97.457	1	75.781	17.553	0
GFGFVTFDDHDPVDK	15	1	0	Unmodified	_GFGFVTFDDHDPVDK_			0	0	P22626;P22626-2	P22626	P22626	HNRNPA2B1	Heterogeneous nuclear ribonucleoproteins A2/B1	>sp|P22626|ROA2_HUMAN Heterogeneous nuclear ribonucleoproteins A2/B1 OS=Homo sapiens GN=HNRNPA2B1 PE=1 SV=2;>sp|P22626-2|ROA2_HUMAN Isoform A2 of Heterogeneous nuclear ribonucleoproteins A2/B1 OS=Homo sapiens GN=HNRNPA2B1	MULTI-MSMS		JACB153_3	MCF7 R10K8	568.6	3	565.926	1694.76	46883.7	-0.088057	0.14843	0.060369	565.927	568.598	51.586	21.199	0.64981	51.586	51.358	52.008	0		0	0	0	1.8313e-05	2	18911	104.09	104.09	1	75.994	17.19	0
EVFEDAAEIR	10	0	1	Unmodified	_EVFEDAAEIR_			0	0	P19338;H7BY16	P19338	P19338	NCL	Nucleolin	>sp|P19338|NUCL_HUMAN Nucleolin OS=Homo sapiens GN=NCL PE=1 SV=3;>tr|H7BY16|H7BY16_HUMAN Nucleolin (Fragment) OS=Homo sapiens GN=NCL PE=1 SV=2	MULTI-MSMS		JACB153_3	MCF7 R10K8	594.79	2	589.788	1177.56	44980.3	-0.30763	0.23058	-0.077052	589.788	594.792	38.048	16.681	0.91644	38.048	37.571	38.487	0		0	0	0	0.0011019	1	13307	104.22	104.22	1	76.072	20.067	0
EFHLNESGDPSSK	13	1	0	Unmodified	_EFHLNESGDPSSK_			0	0	Q01105;Q01105-2;Q01105-4;Q01105-3;P0DME0	Q01105	Q01105	SET	Protein SET	>sp|Q01105|SET_HUMAN Protein SET OS=Homo sapiens GN=SET PE=1 SV=3;>sp|Q01105-2|SET_HUMAN Isoform 2 of Protein SET OS=Homo sapiens GN=SET;>sp|Q01105-4|SET_HUMAN Isoform 4 of Protein SET OS=Homo sapiens GN=SET;>sp|Q01105-3|SET_HUMAN Isoform 3 of Protein SET	MULTI-MSMS		JACB153_3	MCF7 R10K8	485.56	3	482.888	1445.64	50184.5	0.13139	-0.29151	-0.16012	482.888	485.559	22.805	11.602	0.68767	22.805	22.548	23.235	0		0	0	0	0.0005847	1	6461	92.856	88.553	1	76.111	19.649	0
GVNLPGAAVDLPAVSEK	17	1	0	Unmodified	_GVNLPGAAVDLPAVSEK_			0	0	P14618;P14618-3;H3BQ34;P14618-2;H3BTN5;Q504U3	P14618;P14618-2	P14618	PKM2	Pyruvate kinase isozymes M1/M2;Pyruvate kinase	>sp|P14618|KPYM_HUMAN Pyruvate kinase PKM OS=Homo sapiens GN=PKM PE=1 SV=4;>sp|P14618-3|KPYM_HUMAN Isoform 3 of Pyruvate kinase PKM OS=Homo sapiens GN=PKM;>tr|H3BQ34|H3BQ34_HUMAN Pyruvate kinase OS=Homo sapiens GN=PKM PE=1 SV=1;>sp|P14618-2|KPYM_HUMAN Isof	MULTI-MSMS		JACB153_3	MCF7 R10K8	822.96	2	818.949	1635.88	39000.6	-0.54803	0.033386	-0.51464	818.949	822.956	53.312	21.771	0.49556	53.312	53.078	53.574	3.8147e-06		0	0	0	2.1511e-08	2	19583	126.07	126.07	1	76.216	16.871	0
VFIMDSCDELIPEYLNFIR	19	0	1	Unmodified	_VFIMDSCDELIPEYLNFIR_			0	0	P08238	P08238	P08238	HSP90AB1	Heat shock protein HSP 90-beta	>sp|P08238|HS90B_HUMAN Heat shock protein HSP 90-beta OS=Homo sapiens GN=HSP90AB1 PE=1 SV=4	MULTI-MSMS		JACB153_3	MCF7 R10K8	1193.08	2	1187.58	2373.14	31795.6	-0.51022	-0.037266	-0.54749	1188.08	1193.08	89.071	33.691	0.84787	89.071	88.738	89.586	0		0	0	0	4.213e-21	3	32684	231.91	231.91	1	76.288	23.355	0
TFVNITPAEVGVLVGK	16	1	0	Unmodified	_TFVNITPAEVGVLVGK_			0	0	P07737;I3L3D5	P07737	P07737	PFN1	Profilin-1	>sp|P07737|PROF1_HUMAN Profilin-1 OS=Homo sapiens GN=PFN1 PE=1 SV=2;>tr|I3L3D5|I3L3D5_HUMAN Profilin-1 (Fragment) OS=Homo sapiens GN=PFN1 PE=1 SV=1	MULTI-MSMS		JACB153_3	MCF7 R10K8	826.48	2	822.472	1642.93	38748.4	-0.56676	-1.6704	-2.2371	822.972	826.479	65.826	25.942	1.8485	65.826	65.496	67.344	0		0	0	0	1.1939e-07	5	24448	134.88	134.88	1	76.551	15.535	0
GLVGEIIK	8	1	0	Unmodified	_GLVGEIIK_			0	0	P15531-2;P15531;E7ERL0;E5RHP0;C9K028;Q32Q12;P22392-2;J3KPD9;P22392	P15531-2;Q32Q12	Q32Q12	NME1;NME1-NME2;NME2	Nucleoside diphosphate kinase A;Nucleoside diphosphate kinase;Nucleoside diphosphate kinase B	>sp|P15531-2|NDKA_HUMAN Isoform 2 of Nucleoside diphosphate kinase A OS=Homo sapiens GN=NME1;>sp|P15531|NDKA_HUMAN Nucleoside diphosphate kinase A OS=Homo sapiens GN=NME1 PE=1 SV=1;>tr|E7ERL0|E7ERL0_HUMAN Nucleoside diphosphate kinase A OS=Homo sapiens GN=	MULTI-MSMS		JACB153_3	MCF7 R10K8	414.76	2	414.763	827.512	53965.1	-0.014093	-0.27491	-0.28901	414.763	418.77	39.896	17.301	0.81561	39.896	39.629	40.445	0		0	0	0	0.0084965	2	14064	75.213	9.1397	1	76.619	16.637	0
AAGVNVEPFWPGLFAK	16	1	0	Unmodified	_AAGVNVEPFWPGLFAK_			0	0	P05386	P05386	P05386	RPLP1	60S acidic ribosomal protein P1	>sp|P05386|RLA1_HUMAN 60S acidic ribosomal protein P1 OS=Homo sapiens GN=RPLP1 PE=1 SV=1	MULTI-MSMS		JACB153_3	MCF7 R10K8	855.96	2	851.951	1701.89	37352.4	-0.093426	-0.37197	-0.46539	852.452	855.958	72.97	28.324	0.67319	72.97	72.617	73.29	0		0	0	0	1.0147e-05	2	26896	103.21	103.21	1	76.622	18.612	0
MELITILEK	9	1	0	Acetyl (Protein N-term)	_(ac)MELITILEK_			1	0	Q14974;J3QR48	Q14974	Q14974	KPNB1	Importin subunit beta-1	>sp|Q14974|IMB1_HUMAN Importin subunit beta-1 OS=Homo sapiens GN=KPNB1 PE=1 SV=2;>tr|J3QR48|J3QR48_HUMAN Importin subunit beta-1 (Fragment) OS=Homo sapiens GN=KPNB1 PE=1 SV=2	MULTI-MSMS		JACB153_3	MCF7 R10K8	570.33	2	566.32	1130.63	46499.4	0.21514	-0.28442	-0.069283	566.32	570.327	97.223	62.008	0.71522	97.223	96.953	97.669	0		0	0	0	0.00079007	3	35436	94.692	94.692	1	76.697	28.965	0
NTGIICTIGPASR	13	0	1	Unmodified	_NTGIICTIGPASR_			0	0	P14618;H3BQ34;H3BTJ2;H3BUW1;H3BT25;H3BU13;P14618-2;H3BTN5	P14618;P14618-2	P14618	PKM2	Pyruvate kinase isozymes M1/M2;Pyruvate kinase	>sp|P14618|KPYM_HUMAN Pyruvate kinase PKM OS=Homo sapiens GN=PKM PE=1 SV=4;>tr|H3BQ34|H3BQ34_HUMAN Pyruvate kinase OS=Homo sapiens GN=PKM PE=1 SV=1;>tr|H3BTJ2|H3BTJ2_HUMAN Pyruvate kinase PKM (Fragment) OS=Homo sapiens GN=PKM PE=1 SV=1;>tr|H3BUW1|H3BUW1_HU	MULTI-MSMS		JACB153_3	MCF7 R10K8	685.36	2	680.356	1358.7	41863.6	0.11617	0.17891	0.29508	680.357	685.361	37.228	16.408	0.80706	37.228	36.806	37.613	0		0	0	0	6.9493e-05	2	12844	124.45	111.33	1	76.865	16.563	0
DALSDLALHFLNK	13	1	0	Unmodified	_DALSDLALHFLNK_			0	0	P50991;B7Z9L0;P50991-2;B7Z2F4	P50991	P50991	CCT4	T-complex protein 1 subunit delta	>sp|P50991|TCPD_HUMAN T-complex protein 1 subunit delta OS=Homo sapiens GN=CCT4 PE=1 SV=4;>tr|B7Z9L0|B7Z9L0_HUMAN T-complex protein 1 subunit delta OS=Homo sapiens GN=CCT4 PE=1 SV=1;>sp|P50991-2|TCPD_HUMAN Isoform 2 of T-complex protein 1 subunit delta OS=	MULTI-MSMS		JACB153_3	MCF7 R10K8	488.94	3	486.265	1455.77	50084.8	0.73314	0.40955	1.1427	486.265	488.937	73.292	28.435	0.98457	73.292	72.782	73.767	0		0	0	0	0.00020466	1	27157	95.417	95.417	1	76.909	22.303	0
PVSSAASVYAGAGGSGSR	18	0	1	Unmodified	_PVSSAASVYAGAGGSGSR_			0	0	P05783;F8VZY9	P05783	P05783	KRT18	Keratin, type I cytoskeletal 18	>sp|P05783|K1C18_HUMAN Keratin, type I cytoskeletal 18 OS=Homo sapiens GN=KRT18 PE=1 SV=2;>tr|F8VZY9|F8VZY9_HUMAN Keratin, type I cytoskeletal 18 OS=Homo sapiens GN=KRT18 PE=1 SV=1	MULTI-MSMS		JACB153_3	MCF7 R10K8	795.89	2	790.887	1579.76	39215.3	-1.2939	0.16572	-1.1282	790.888	795.891	25.576	12.527	1.1346	25.576	25.05	26.184	0		0	0	0	9.6306e-17	3	7759	215.45	215.45	1	76.956	16.32	0
LTVSSLQESGLK	12	1	0	Unmodified	_LTVSSLQESGLK_			0	0	P21333;P21333-2;Q5HY54;E9PHF0	P21333	P21333	FLNA	Filamin-A	>sp|P21333|FLNA_HUMAN Filamin-A OS=Homo sapiens GN=FLNA PE=1 SV=4;>sp|P21333-2|FLNA_HUMAN Isoform 2 of Filamin-A OS=Homo sapiens GN=FLNA;>tr|Q5HY54|Q5HY54_HUMAN Filamin-A OS=Homo sapiens GN=FLNA PE=1 SV=1;>tr|E9PHF0|E9PHF0_HUMAN Filamin-A OS=Homo sapiens G	MULTI-MSMS		JACB153_3	MCF7 R10K8	635.36	2	631.354	1260.69	44493.4	0.053368	-0.37157	-0.3182	631.353	635.36	37.392	16.465	0.45044	37.392	37.213	37.663	0		0	0	0	2.8741e-06	1	12956	161.99	82.953	1	77.02	20.699	0
VSFELFADK	9	1	0	Unmodified	_VSFELFADK_			0	0	P62937;C9J5S7;F8WE65	P62937	P62937	PPIA	Peptidyl-prolyl cis-trans isomerase A;Peptidyl-prolyl cis-trans isomerase	>sp|P62937|PPIA_HUMAN Peptidyl-prolyl cis-trans isomerase A OS=Homo sapiens GN=PPIA PE=1 SV=2;>tr|C9J5S7|C9J5S7_HUMAN Peptidyl-prolyl cis-trans isomerase OS=Homo sapiens GN=PPIA PE=1 SV=1;>tr|F8WE65|F8WE65_HUMAN Peptidyl-prolyl cis-trans isomerase OS=Homo	MULTI-MSMS		JACB153_3	MCF7 R10K8	532.28	2	528.274	1054.53	48296.5	0.014162	-0.25575	-0.24158	528.274	532.281	53.683	21.891	0.76247	53.683	53.429	54.191	0		0	0	0	0.0010368	3	19725	98.249	80.385	1	77.076	15.253	0
LTDCVVMR	8	0	1	Unmodified	_LTDCVVMR_			0	0	P22626;P22626-2	P22626	P22626	HNRNPA2B1	Heterogeneous nuclear ribonucleoproteins A2/B1	>sp|P22626|ROA2_HUMAN Heterogeneous nuclear ribonucleoproteins A2/B1 OS=Homo sapiens GN=HNRNPA2B1 PE=1 SV=2;>sp|P22626-2|ROA2_HUMAN Isoform A2 of Heterogeneous nuclear ribonucleoproteins A2/B1 OS=Homo sapiens GN=HNRNPA2B1	MULTI-MSMS		JACB153_3	MCF7 R10K8	502.25	2	497.246	992.478	48904.7	-0.18242	-0.93031	-1.1127	497.246	502.251	27.836	13.278	0.45219	27.836	27.677	28.129	-1.9073e-06		0	0	0	0.0025446	2	8700	98.458	70.284	1	77.117	20.161	0
MTDQEAIQDLWQWR	14	0	1	Unmodified	_MTDQEAIQDLWQWR_			0	0	P06748;P06748-2	P06748	P06748	NPM1	Nucleophosmin	>sp|P06748|NPM_HUMAN Nucleophosmin OS=Homo sapiens GN=NPM1 PE=1 SV=2;>sp|P06748-2|NPM_HUMAN Isoform 2 of Nucleophosmin OS=Homo sapiens GN=NPM1	MULTI-MSMS		JACB153_3	MCF7 R10K8	610.62	3	607.286	1818.84	44615.5	0.1774	-0.2205	-0.043098	607.286	610.622	71.191	27.73	0.88885	71.191	70.814	71.703	-7.6294e-06		0	0	0	8.954e-06	2	26370	139.86	139.86	1	77.134	23.638	0
ILEFFGLK	8	1	0	Unmodified	_ILEFFGLK_			0	0	P07237;H7BZ94;F5H8J2;H0Y3Z3;I3L398;I3L4M2	P07237	P07237	P4HB	Protein disulfide-isomerase	>sp|P07237|PDIA1_HUMAN Protein disulfide-isomerase OS=Homo sapiens GN=P4HB PE=1 SV=3;>tr|H7BZ94|H7BZ94_HUMAN Protein disulfide-isomerase OS=Homo sapiens GN=P4HB PE=1 SV=2;>tr|F5H8J2|F5H8J2_HUMAN Uncharacterized protein OS=Homo sapiens GN=P4HB PE=1 SV=1;>tr	MULTI-MSMS		JACB153_3	MCF7 R10K8	487.79	2	483.787	965.559	50542.1	0.24862	-0.32987	-0.08125	483.787	487.793	63.353	25.119	1.2727	63.353	63.048	64.32	0		0	0	0	0.0026356	3	23443	94.114	47.689	1	77.208	19.058	0
GGYFDEFGIIR	11	0	1	Unmodified	_GGYFDEFGIIR_			0	0	P11413-2;P11413-3;P11413;E7EUI8;E7EM57	P11413-2	P11413-2	G6PD	Glucose-6-phosphate 1-dehydrogenase	>sp|P11413-2|G6PD_HUMAN Isoform Long of Glucose-6-phosphate 1-dehydrogenase OS=Homo sapiens GN=G6PD;>sp|P11413-3|G6PD_HUMAN Isoform 3 of Glucose-6-phosphate 1-dehydrogenase OS=Homo sapiens GN=G6PD;>sp|P11413|G6PD_HUMAN Glucose-6-phosphate 1-dehydrogenase O	MULTI-MSMS		JACB153_3	MCF7 R10K8	642.32	2	637.314	1272.61	43921.3	-0.29357	0.22577	-0.067791	637.816	642.319	62.003	24.667	0.78176	62.003	61.716	62.497	0		0	0	0	0.0083117	2	23065	76.143	66.189	1	77.353	19.767	0
SALSGHLETVILGLLK	16	1	0	Unmodified	_SALSGHLETVILGLLK_			0	0	P07355-2;P07355;H0YN42;A6NMY6;H0YMU9;H0YMD0;H0YM50;H0YKS4;H0YNP5;H0YMM1;H0YMW4;H0YKX9;H0YMT9;H0YLV6;H0YKZ7;H0YKL9	P07355-2	P07355-2	ANXA2;ANXA2P2	Annexin A2;Annexin;Putative annexin A2-like protein	>sp|P07355-2|ANXA2_HUMAN Isoform 2 of Annexin A2 OS=Homo sapiens GN=ANXA2;>sp|P07355|ANXA2_HUMAN Annexin A2 OS=Homo sapiens GN=ANXA2 PE=1 SV=2;>tr|H0YN42|H0YN42_HUMAN Annexin (Fragment) OS=Homo sapiens GN=ANXA2 PE=1 SV=1;>sp|A6NMY6|AXA2L_HUMAN Putative ann	MULTI-MSMS		JACB153_3	MCF7 R10K8	553.67	3	550.998	1649.97	47410.7	0.64366	-0.3027	0.34096	551.332	553.669	72.292	28.098	1.3659	72.292	71.879	73.245	0		0	0	0	1.0718e-07	3	26765	137.19	137.19	1	77.889	21.074	0
EGLELLK	7	1	0	Unmodified	_EGLELLK_			0	0	P06733;P06733-2	P06733	P06733	ENO1	Alpha-enolase	>sp|P06733|ENOA_HUMAN Alpha-enolase OS=Homo sapiens GN=ENO1 PE=1 SV=2;>sp|P06733-2|ENOA_HUMAN Isoform MBP-1 of Alpha-enolase OS=Homo sapiens GN=ENO1	MULTI-MSMS		JACB153_3	MCF7 R10K8	405.25	2	401.239	800.464	54424	-0.11657	-0.2355	-0.35207	401.239	405.246	40.018	17.341	0.62124	40.018	39.775	40.396	0		0	0	0	0.0082844	1	14065	91.626	24.633	1	77.891	18.442	0
VEAEILK	7	1	0	Unmodified	_VEAEILK_			0	0	REV__O94905;REV__E5RHW4;REV__E5RJ09	REV__O94905	REV__O94905			>sp|O94905|ERLN2_HUMAN Erlin-2 OS=Homo sapiens GN=ERLIN2 PE=1 SV=1;>tr|E5RHW4|E5RHW4_HUMAN Erlin-2 (Fragment) OS=Homo sapiens GN=ERLIN2 PE=1 SV=1;>tr|E5RJ09|E5RJ09_HUMAN Erlin-2 (Fragment) OS=Homo sapiens GN=ERLIN2 PE=1 SV=1	MULTI-MSMS		JACB153_3	MCF7 R10K8	406.25	2	401.239	800.464	54424	-0.11657	-0.2355	-0.35207	401.239	405.246	40.018	17.341	0.62124	40.018	39.775	40.396	0		0	0	0	0.093153	1	14215	36.185	8.0788	1	77.891	18.442	0
STGGAPTFNVTVTK	14	1	0	Unmodified	_STGGAPTFNVTVTK_			0	0	P07737;K7EJ44	P07737	P07737	PFN1	Profilin-1	>sp|P07737|PROF1_HUMAN Profilin-1 OS=Homo sapiens GN=PFN1 PE=1 SV=2;>tr|K7EJ44|K7EJ44_HUMAN Profilin 1, isoform CRA_b OS=Homo sapiens GN=PFN1 PE=1 SV=1	MULTI-MSMS		JACB153_3	MCF7 R10K8	694.37	2	690.362	1378.71	42435.4	-0.63441	0.045526	-0.58888	690.361	694.369	35.891	15.964	0.65333	35.891	35.653	36.307	0		0	0	0	1.5303e-05	3	12264	127.36	127.36	1	78.028	16.205	0
ISSDLDGHPVPK	12	1	0	Unmodified	_ISSDLDGHPVPK_			0	0	P29401-2;P29401;B4E022;E9PFF2;F8W888	P29401-2	P29401-2	TKT	Transketolase	>sp|P29401-2|TKT_HUMAN Isoform 2 of Transketolase OS=Homo sapiens GN=TKT;>sp|P29401|TKT_HUMAN Transketolase OS=Homo sapiens GN=TKT PE=1 SV=3;>tr|B4E022|B4E022_HUMAN Transketolase OS=Homo sapiens GN=TKT PE=1 SV=1;>tr|E9PFF2|E9PFF2_HUMAN Transketolase OS=Hom	MULTI-MSMS		JACB153_3	MCF7 R10K8	424.89	3	422.223	1263.65	53746.1	-0.086873	-0.031947	-0.11882	422.222	424.894	21.536	11.181	0.49019	21.536	21.256	21.746	0		0	0	0	0.0055567	1	5968	84.289	78.787	1	78.404	20.409	0
EILVGDVGQTVDDPYATFVK	20	1	0	Unmodified	_EILVGDVGQTVDDPYATFVK_			0	0	E9PK25;P23528;G3V1A4;E9PP50;E9PQB7;E9PS23;E9PLJ3	E9PK25	E9PK25	CFL1	Cofilin-1	>tr|E9PK25|E9PK25_HUMAN Cofilin-1 OS=Homo sapiens GN=CFL1 PE=1 SV=1;>sp|P23528|COF1_HUMAN Cofilin-1 OS=Homo sapiens GN=CFL1 PE=1 SV=3;>tr|G3V1A4|G3V1A4_HUMAN Cofilin 1 (Non-muscle), isoform CRA_a OS=Homo sapiens GN=CFL1 PE=1 SV=1;>tr|E9PP50|E9PP50_HUMAN Co	MULTI-MSMS		JACB153_3	MCF7 R10K8	725.38	3	722.704	2165.09	41208.8	-0.30949	-0.49036	-0.79985	722.704	725.709	65.224	25.745	0.66425	65.224	64.909	65.573	0		0	0	0	1.7604e-07	1	24133	114.55	107.1	1	78.697	18.356	0
AALEDTLAETEAR	13	0	1	Unmodified	_AALEDTLAETEAR_			0	0	CON__P08727;P08727;K7EMS3	CON__P08727	CON__P08727	KRT19	Keratin, type I cytoskeletal 19	>P08727 SWISS-PROT:P08727 Tax_Id=9606 Gene_Symbol=KRT19 Keratin, type I cytoskeletal 19;>sp|P08727|K1C19_HUMAN Keratin, type I cytoskeletal 19 OS=Homo sapiens GN=KRT19 PE=1 SV=4;>tr|K7EMS3|K7EMS3_HUMAN Keratin, type I cytoskeletal 19 (Fragment) OS=Homo sap	MULTI-MSMS		JACB153_3	MCF7 R10K8	700.35	2	695.346	1388.68	41747.6	-0.71014	-0.62729	-1.3374	695.346	700.35	38.258	16.753	0.69919	38.258	37.99	38.69	0		0	0	0	7.019e-05	3	13282	124.3	103.84	1	78.78	15.583	0
LVSESSDVLPK	11	1	0	Unmodified	_LVSESSDVLPK_			0	0	P05787-2;CON__P05787;P05787	P05787-2	P05787-2	KRT8	Keratin, type II cytoskeletal 8	>sp|P05787-2|K2C8_HUMAN Isoform 2 of Keratin, type II cytoskeletal 8 OS=Homo sapiens GN=KRT8;>P05787 SWISS-PROT:P05787 Tax_Id=9606 Gene_Symbol=KRT8 Keratin, type II cytoskeletal 8;>sp|P05787|K2C8_HUMAN Keratin, type II cytoskeletal 8 OS=Homo sapiens GN=KRT	MULTI-MSMS		JACB153_3	MCF7 R10K8	591.33	2	587.322	1172.63	45553.9	-0.33178	-1.0354	-1.3672	587.322	591.329	31.359	14.454	1.9802	31.359	30.765	32.745	0		0	0	0	0.00064559	3	10184	107.03	91.436	1	79.158	12.732	0
LLEFQLALK	9	1	0	Unmodified	_LLEFQLALK_			0	0	P31948;G3XAD8;F5H0T1;H0YGI8	P31948	P31948	STIP1	Stress-induced-phosphoprotein 1	>sp|P31948|STIP1_HUMAN Stress-induced-phosphoprotein 1 OS=Homo sapiens GN=STIP1 PE=1 SV=1;>tr|G3XAD8|G3XAD8_HUMAN Stress-induced-phosphoprotein 1 OS=Homo sapiens GN=STIP1 PE=1 SV=1;>tr|F5H0T1|F5H0T1_HUMAN Stress-induced-phosphoprotein 1 OS=Homo sapiens GN=	MULTI-MSMS		JACB153_3	MCF7 R10K8	541.84	2	537.832	1073.65	47755.7	0.13552	0.22296	0.35847	537.831	541.839	59.497	23.83	1.0387	59.497	59.056	60.094	0		0	0	0	0.0056457	1	22021	78.113	45.793	1	79.163	21.786	0
LASDLLEWIR	10	0	1	Unmodified	_LASDLLEWIR_			0	0	O43707;O43707-2;K7EJH8;P12814;P12814-3;P12814-4;P12814-2;H9KV75;G3V2W4	O43707;P12814	O43707	ACTN4;ACTN1	Alpha-actinin-4;Alpha-actinin-1	>sp|O43707|ACTN4_HUMAN Alpha-actinin-4 OS=Homo sapiens GN=ACTN4 PE=1 SV=2;>sp|O43707-2|ACTN4_HUMAN Isoform ACTN4ISO of Alpha-actinin-4 OS=Homo sapiens GN=ACTN4;>tr|K7EJH8|K7EJH8_HUMAN Alpha-actinin-4 (Fragment) OS=Homo sapiens GN=ACTN4 PE=1 SV=1;>sp|P12814	MULTI-MSMS		JACB153_3	MCF7 R10K8	613.34	2	608.34	1214.67	44963	0.010014	0.12206	0.13207	608.34	613.344	69.417	27.138	0.64542	69.417	69.154	69.799	0		0	0	0	1.1847e-05	2	25766	170.72	170.72	1	79.173	24.666	0
TVTNAVVTVPAYFNDSQR	18	0	1	Unmodified	_TVTNAVVTVPAYFNDSQR_			0	0	P11142;P11142-2;E9PN89;E9PLF4;E9PQK7;E9PQQ4;E9PI65;E9PK54	P11142;E9PK54	P11142	HSPA8	Heat shock cognate 71 kDa protein	>sp|P11142|HSP7C_HUMAN Heat shock cognate 71 kDa protein OS=Homo sapiens GN=HSPA8 PE=1 SV=1;>sp|P11142-2|HSP7C_HUMAN Isoform 2 of Heat shock cognate 71 kDa protein OS=Homo sapiens GN=HSPA8;>tr|E9PN89|E9PN89_HUMAN Heat shock cognate 71 kDa protein (Fragment	MULTI-MSMS		JACB153_3	MCF7 R10K8	664.67	3	661.337	1980.99	43021.9	-0.66248	0.34691	-0.31557	661.672	664.674	52.317	21.436	1.2293	52.317	51.912	53.142	0		0	0	0	3.7313e-07	1	19167	108.34	102.07	1	79.202	22.348	0
LPLQDVYK	8	1	0	Unmodified	_LPLQDVYK_			0	0	Q05639;P68104;Q5VTE0	Q05639;P68104	P68104	EEF1A2;EEF1A1;EEF1A1P5	Elongation factor 1-alpha 2;Elongation factor 1-alpha 1;Putative elongation factor 1-alpha-like 3	>sp|Q05639|EF1A2_HUMAN Elongation factor 1-alpha 2 OS=Homo sapiens GN=EEF1A2 PE=1 SV=1;>sp|P68104|EF1A1_HUMAN Elongation factor 1-alpha 1 OS=Homo sapiens GN=EEF1A1 PE=1 SV=1;>sp|Q5VTE0|EF1A3_HUMAN Putative elongation factor 1-alpha-like 3 OS=Homo sapiens G	MULTI-MSMS		JACB153_3	MCF7 R10K8	492.29	2	488.279	974.544	50125	0.46595	-1.4317	-0.96576	488.28	492.285	36.872	16.293	1.3335	36.872	36.28	37.613	0		0	0	0	0.002615	3	12723	95.099	54.112	1	79.316	14.202	0
LGDVYVNDAFGTAHR	15	0	1	Unmodified	_LGDVYVNDAFGTAHR_			0	0	P00558;B7Z7A9;P07205	P00558	P00558	PGK1;PGK2	Phosphoglycerate kinase 1;Phosphoglycerate kinase;Phosphoglycerate kinase 2	>sp|P00558|PGK1_HUMAN Phosphoglycerate kinase 1 OS=Homo sapiens GN=PGK1 PE=1 SV=3;>tr|B7Z7A9|B7Z7A9_HUMAN Phosphoglycerate kinase OS=Homo sapiens GN=PGK1 PE=1 SV=1;>sp|P07205|PGK2_HUMAN Phosphoglycerate kinase 2 OS=Homo sapiens GN=PGK2 PE=1 SV=3	MULTI-MSMS		JACB153_3	MCF7 R10K8	548.94	3	545.602	1633.78	47000.6	-0.39337	-0.40617	-0.79954	545.602	548.938	39.342	17.116	0.96159	39.342	38.862	39.824	0		0	0	0	2.2981e-07	2	13792	134.9	129.47	1	79.42	19.321	0
VFIMDSCDELIPEYLNFIR	19	0	1	Unmodified	_VFIMDSCDELIPEYLNFIR_			0	0	P08238	P08238	P08238	HSP90AB1	Heat shock protein HSP 90-beta	>sp|P08238|HS90B_HUMAN Heat shock protein HSP 90-beta OS=Homo sapiens GN=HSP90AB1 PE=1 SV=4	MULTI-MSMS		JACB153_3	MCF7 R10K8	795.72	3	792.053	2373.14	39007.3	-0.43755	-0.14701	-0.58457	792.388	795.724	89.075	33.691	1.2783	89.075	88.751	90.029	-7.6294e-06		0	0	0	6.4948e-11	2	32606	138.05	138.05	1	79.674	25.786	0
YYVTIIDAPGHR	12	0	1	Unmodified	_YYVTIIDAPGHR_			0	0	P68104;Q5VTE0;Q5JR01;A6PW80	P68104	P68104	EEF1A1;EEF1A1P5	Elongation factor 1-alpha 1;Putative elongation factor 1-alpha-like 3	>sp|P68104|EF1A1_HUMAN Elongation factor 1-alpha 1 OS=Homo sapiens GN=EEF1A1 PE=1 SV=1;>sp|Q5VTE0|EF1A3_HUMAN Putative elongation factor 1-alpha-like 3 OS=Homo sapiens GN=EEF1A1P5 PE=5 SV=1;>tr|Q5JR01|Q5JR01_HUMAN Elongation factor 1-alpha 1 (Fragment) OS=	MULTI-MSMS		JACB153_3	MCF7 R10K8	472.25	3	468.914	1403.72	51059.1	0.33773	0.097413	0.43514	468.914	472.25	37.297	16.435	0.60833	37.297	37.078	37.686	0		0	0	0	0.00063695	2	12887	93.345	93.345	1	79.826	18.965	0
APVILGSPDDVLEFLK	16	1	0	Unmodified	_APVILGSPDDVLEFLK_			0	0	P09467	P09467	P09467	FBP1	Fructose-1,6-bisphosphatase 1	>sp|P09467|F16P1_HUMAN Fructose-1,6-bisphosphatase 1 OS=Homo sapiens GN=FBP1 PE=1 SV=5	MULTI-MSMS		JACB153_3	MCF7 R10K8	860.98	2	856.977	1711.94	38191.2	-0.25694	-0.29861	-0.55555	856.977	860.984	80.137	30.713	0.7242	80.137	79.812	80.536	0		0	0	0	2.9363e-08	3	29581	151.9	151.9	1	79.892	22.275	0
DAGTIAGLNVLR	12	0	1	Unmodified	_DAGTIAGLNVLR_			0	0	P11142;E9PKE3;P11142-2;E9PN89;E9PLF4;E9PQK7;E9PQQ4;E9PI65;E9PK54	P11142;E9PK54	P11142	HSPA8	Heat shock cognate 71 kDa protein	>sp|P11142|HSP7C_HUMAN Heat shock cognate 71 kDa protein OS=Homo sapiens GN=HSPA8 PE=1 SV=1;>tr|E9PKE3|E9PKE3_HUMAN Heat shock cognate 71 kDa protein OS=Homo sapiens GN=HSPA8 PE=1 SV=1;>sp|P11142-2|HSP7C_HUMAN Isoform 2 of Heat shock cognate 71 kDa protein	MULTI-MSMS		JACB153_3	MCF7 R10K8	605.35	2	600.341	1198.67	45454.2	-0.33321	0.038851	-0.29436	600.341	605.345	53.832	21.94	1.183	53.832	53.349	54.532	3.8147e-06		0	0	0	0.00022184	1	19817	111.63	105.44	1	79.923	17.872	0
LISWYDNEFGYSNR	14	0	1	Unmodified	_LISWYDNEFGYSNR_			0	0	P04406;P04406-2;E7EUT5	P04406	P04406	GAPDH	Glyceraldehyde-3-phosphate dehydrogenase	>sp|P04406|G3P_HUMAN Glyceraldehyde-3-phosphate dehydrogenase OS=Homo sapiens GN=GAPDH PE=1 SV=3;>sp|P04406-2|G3P_HUMAN Isoform 2 of Glyceraldehyde-3-phosphate dehydrogenase OS=Homo sapiens GN=GAPDH;>tr|E7EUT5|E7EUT5_HUMAN Glyceraldehyde-3-phosphate dehydr	MULTI-MSMS		JACB153_3	MCF7 R10K8	887.41	2	882.405	1762.8	37028.2	-0.76221	-0.053168	-0.81538	882.403	887.409	57.991	23.327	1.1284	57.991	57.506	58.634	0		0	0	0	3.0276e-07	4	21420	167.98	161.26	1	79.969	16.621	0
VAPEEHPVLLTEAPLNPK	18	1	0	Unmodified	_VAPEEHPVLLTEAPLNPK_			0	0	CON__P60712;P60709;E7EVS6;G5E9R0;P63261;I3L4N8;I3L1U9;I3L3I0;J3KT65;I3L3R2;K7EM38	CON__P60712;P63261	CON__P60712	ACTB;ACTG1	Actin, cytoplasmic 1;Actin, cytoplasmic 1, N-terminally processed;Actin, cytoplasmic 2;Actin, cytoplasmic 2, N-terminally processed	>P60712 SWISS-PROT:P60712 (Bos taurus) Actin, cytoplasmic 1;>sp|P60709|ACTB_HUMAN Actin, cytoplasmic 1 OS=Homo sapiens GN=ACTB PE=1 SV=1;>tr|E7EVS6|E7EVS6_HUMAN Actin, cytoplasmic 1 (Fragment) OS=Homo sapiens GN=ACTB PE=1 SV=2;>tr|G5E9R0|G5E9R0_HUMAN Actin	MULTI-MSMS		JACB153_3	MCF7 R10K8	652.03	3	652.026	1953.06	43414.9	-1.3665	-0.11553	-1.482	652.027	654.699	41.973	17.988	1.1811	41.973	41.627	42.808	0		0	0	0	2.1898e-07	3	14950	115.31	31.172	1	80.015	12.501	0
AAAAAAALQAK	11	1	0	Unmodified	_AAAAAAALQAK_			0	0	P36578;H3BM89;H3BU31	P36578	P36578	RPL4	60S ribosomal protein L4	>sp|P36578|RL4_HUMAN 60S ribosomal protein L4 OS=Homo sapiens GN=RPL4 PE=1 SV=5;>tr|H3BM89|H3BM89_HUMAN 60S ribosomal protein L4 OS=Homo sapiens GN=RPL4 PE=1 SV=1;>tr|H3BU31|H3BU31_HUMAN 60S ribosomal protein L4 (Fragment) OS=Homo sapiens GN=RPL4 PE=1 SV=1	MULTI-MSMS		JACB153_3	MCF7 R10K8	482.79	2	478.78	955.545	49799.9	0.046859	0.012244	0.059103	478.78	482.787	19.245	10.414	0.57329	19.245	18.964	19.537	0		0	0	0	0.00074963	1	5100	96.89	96.89	1	80.034	25.661	0
STTTGHLIYK	10	1	0	Unmodified	_STTTGHLIYK_			0	0	Q05639;P68104;Q5VTE0;Q5JR01;A6PW80	Q05639;P68104	P68104	EEF1A2;EEF1A1;EEF1A1P5	Elongation factor 1-alpha 2;Elongation factor 1-alpha 1;Putative elongation factor 1-alpha-like 3	>sp|Q05639|EF1A2_HUMAN Elongation factor 1-alpha 2 OS=Homo sapiens GN=EEF1A2 PE=1 SV=1;>sp|P68104|EF1A1_HUMAN Elongation factor 1-alpha 1 OS=Homo sapiens GN=EEF1A1 PE=1 SV=1;>sp|Q5VTE0|EF1A3_HUMAN Putative elongation factor 1-alpha-like 3 OS=Homo sapiens G	MULTI-MSMS		JACB153_3	MCF7 R10K8	376.88	3	374.205	1119.59	56436.8	-0.19946	-0.19043	-0.38989	374.205	376.876	17.439	9.8158	1.0917	17.439	17.228	18.319	0		0	0	0	0.007014	3	4336	74.162	57.136	1	80.08	17.236	0
DLYANTVLSGGTTMYPGIADR	21	0	1	Unmodified	_DLYANTVLSGGTTMYPGIADR_			0	0	CON__P60712;P60709;P63261	CON__P60712;P63261	CON__P60712	ACTB;ACTG1	Actin, cytoplasmic 1;Actin, cytoplasmic 1, N-terminally processed;Actin, cytoplasmic 2;Actin, cytoplasmic 2, N-terminally processed	>P60712 SWISS-PROT:P60712 (Bos taurus) Actin, cytoplasmic 1;>sp|P60709|ACTB_HUMAN Actin, cytoplasmic 1 OS=Homo sapiens GN=ACTB PE=1 SV=1;>sp|P63261|ACTG_HUMAN Actin, cytoplasmic 2 OS=Homo sapiens GN=ACTG1 PE=1 SV=1	MULTI-MSMS		JACB153_3	MCF7 R10K8	1113.55	2	1108.04	2214.06	33138.8	-0.80128	-0.4116	-1.2129	1108.54	1113.54	64.732	25.574	1.2611	64.732	64.408	65.669	7.6294e-06		0	0	0	1.0337e-26	4	23935	244.74	232.95	1	80.105	18.451	0
EGMNIVEAMER	11	0	1	Unmodified	_EGMNIVEAMER_			0	0	Q567Q0;P62937	Q567Q0;P62937	P62937	PPIA	Peptidyl-prolyl cis-trans isomerase A	>tr|Q567Q0|Q567Q0_HUMAN Peptidyl-prolyl cis-trans isomerase A OS=Homo sapiens GN=PPIA PE=1 SV=1;>sp|P62937|PPIA_HUMAN Peptidyl-prolyl cis-trans isomerase A OS=Homo sapiens GN=PPIA PE=1 SV=2	MULTI-MSMS		JACB153_3	MCF7 R10K8	644.8	2	639.794	1277.57	43760.5	-0.80714	-0.31643	-1.1236	639.794	644.799	48.566	20.187	0.71429	48.566	48.153	48.867	-3.8147e-06		0	0	0	0.00044598	1	17684	126.12	126.12	1	80.125	20.717	0
MTDQEAIQDLWQWR	14	0	1	Unmodified	_MTDQEAIQDLWQWR_			0	0	P06748;P06748-2	P06748	P06748	NPM1	Nucleophosmin	>sp|P06748|NPM_HUMAN Nucleophosmin OS=Homo sapiens GN=NPM1 PE=1 SV=2;>sp|P06748-2|NPM_HUMAN Isoform 2 of Nucleophosmin OS=Homo sapiens GN=NPM1	MULTI-MSMS		JACB153_3	MCF7 R10K8	915.43	2	910.425	1818.84	36645.4	-0.48635	0.122	-0.36435	910.427	915.43	71.199	27.735	0.92973	71.199	70.773	71.703	0		0	0	0	1.0513e-10	4	26350	206.66	206.66	1	80.129	23.661	0
DITYFIQQLLR	11	0	1	Unmodified	_DITYFIQQLLR_			0	0	P61158;B4DXW1;F5H3P5;Q9P1U1;Q9P1U1-3;Q9P1U1-2;C9IZN3;Q9C0K3;H7C4J1	P61158	P61158	ACTR3;ACTR3B;ACTR3C	Actin-related protein 3;Actin-related protein 3B;Actin-related protein 3C	>sp|P61158|ARP3_HUMAN Actin-related protein 3 OS=Homo sapiens GN=ACTR3 PE=1 SV=3;>tr|B4DXW1|B4DXW1_HUMAN Actin-related protein 3 OS=Homo sapiens GN=ACTR3 PE=1 SV=1;>tr|F5H3P5|F5H3P5_HUMAN Actin-related protein 3 OS=Homo sapiens GN=ACTR3 PE=1 SV=1;>sp|Q9P1U	MULTI-MSMS		JACB153_3	MCF7 R10K8	710.4	2	705.393	1408.77	41589.4	-0.17887	0.20215	0.02328	705.392	710.397	97.384	63.016	0.60333	97.384	97.086	97.689	7.6294e-06		0	0	0	0.00063077	2	35477	108.47	89.338	1	80.204	44.131	0
VVLAYEPVWAIGTGK	15	1	0	Unmodified	_VVLAYEPVWAIGTGK_			0	0	P60174;P60174-1;P60174-4;U3KPZ0;U3KQF3	P60174	P60174	TPI1	Triosephosphate isomerase	>sp|P60174|TPIS_HUMAN Triosephosphate isomerase OS=Homo sapiens GN=TPI1 PE=1 SV=3;>sp|P60174-1|TPIS_HUMAN Isoform 2 of Triosephosphate isomerase OS=Homo sapiens GN=TPI1;>sp|P60174-4|TPIS_HUMAN Isoform 4 of Triosephosphate isomerase OS=Homo sapiens GN=TPI1;	MULTI-MSMS		JACB153_3	MCF7 R10K8	537.97	3	534.968	1601.88	48252.2	0.26021	0.039599	0.29981	534.968	537.639	63.622	25.212	0.62352	63.622	63.396	64.02	0		0	0	0	3.0672e-07	1	23570	127.36	127.36	1	80.454	20.372	0
GPSSVEDIK	9	1	0	Unmodified	_GPSSVEDIK_			0	0	P06748;P06748-2;P06748-3	P06748	P06748	NPM1	Nucleophosmin	>sp|P06748|NPM_HUMAN Nucleophosmin OS=Homo sapiens GN=NPM1 PE=1 SV=2;>sp|P06748-2|NPM_HUMAN Isoform 2 of Nucleophosmin OS=Homo sapiens GN=NPM1;>sp|P06748-3|NPM_HUMAN Isoform 3 of Nucleophosmin OS=Homo sapiens GN=NPM1	MULTI-MSMS		JACB153_3	MCF7 R10K8	470.25	2	466.24	930.466	50523.9	0.020143	0.10477	0.12491	466.24	470.247	19.7	10.569	0.41432	19.7	19.537	19.952	0		0	0	0	0.0034268	1	5219	85.807	60.554	1	80.61	22.076	0
CIESLIAVFQK	11	1	0	Unmodified	_CIESLIAVFQK_			0	0	P31949	P31949	P31949	S100A11	Protein S100-A11	>sp|P31949|S10AB_HUMAN Protein S100-A11 OS=Homo sapiens GN=S100A11 PE=1 SV=2	MULTI-MSMS		JACB153_3	MCF7 R10K8	658.36	2	654.355	1306.7	43210.5	-0.36959	0.55631	0.18672	654.356	658.362	64.159	25.39	0.80943	64.159	63.872	64.681	0		0	0	0	0.00045137	2	23736	125.74	125.74	1	80.733	22.269	0
YPIEHGIITNWDDMEK	16	1	0	Unmodified	_YPIEHGIITNWDDMEK_			0	0	P68032;P68133;P62736;P63267;A6NL76;Q5T8M8;F6QUT6;F6UVQ4;C9JFL5;B8ZZJ2;F8WB63	P68032	P68032	ACTC1;ACTA1;ACTA2;ACTG2	Actin, alpha cardiac muscle 1;Actin, alpha skeletal muscle;Actin, aortic smooth muscle;Actin, gamma-enteric smooth muscle	>sp|P68032|ACTC_HUMAN Actin, alpha cardiac muscle 1 OS=Homo sapiens GN=ACTC1 PE=1 SV=1;>sp|P68133|ACTS_HUMAN Actin, alpha skeletal muscle OS=Homo sapiens GN=ACTA1 PE=1 SV=1;>sp|P62736|ACTA_HUMAN Actin, aortic smooth muscle OS=Homo sapiens GN=ACTA2 PE=1 SV=	MULTI-MSMS		JACB153_3	MCF7 R10K8	657.31	3	654.308	1959.9	43245.7	-0.82329	-0.42934	-1.2526	654.644	657.314	46.938	19.644	0.77991	46.938	46.55	47.329	0		0	0	0	1.1419e-05	3	16991	100.41	90.995	1	80.746	13.231	0
FDGALNVDLTEFQTNLVPYPR	21	0	1	Unmodified	_FDGALNVDLTEFQTNLVPYPR_			0	0	Q71U36;Q71U36-2;Q13748;Q6PEY2;Q13748-2;V9GZ17;F5H5D3;Q9BQE3;F8VVB9;P68366;A8MUB1;C9JDS9;P68363;CON__ENSEMBL:ENSBTAP00000016242	Q71U36;F5H5D3;P68366;P68363	P68363	TUBA1A;TUBA3C;TUBA3E;TUBA1C;TUBA1B;TUBA4A	Tubulin alpha-1A chain;Tubulin alpha-3C/D chain;Tubulin alpha-3E chain;Tubulin alpha-1C chain;Tubulin alpha-4A chain;Tubulin alpha-1B chain	>sp|Q71U36|TBA1A_HUMAN Tubulin alpha-1A chain OS=Homo sapiens GN=TUBA1A PE=1 SV=1;>sp|Q71U36-2|TBA1A_HUMAN Isoform 2 of Tubulin alpha-1A chain OS=Homo sapiens GN=TUBA1A;>sp|Q13748|TBA3C_HUMAN Tubulin alpha-3C/D chain OS=Homo sapiens GN=TUBA3C PE=1 SV=3;>sp	MULTI-MSMS		JACB153_3	MCF7 R10K8	807.41	3	803.741	2408.2	38929	-0.24974	-0.20262	-0.45236	804.075	807.411	78.304	30.103	1.7367	78.304	77.939	79.675	0		0	0	0	3.1369e-26	4	28848	232.84	232.84	1	80.829	19.797	0
GNDVAFHFNPR	11	0	1	Unmodified	_GNDVAFHFNPR_			0	0	P17931;G3V3R6	P17931	P17931	LGALS3	Galectin-3	>sp|P17931|LEG3_HUMAN Galectin-3 OS=Homo sapiens GN=LGALS3 PE=1 SV=5;>tr|G3V3R6|G3V3R6_HUMAN Galectin OS=Homo sapiens GN=LGALS3 PE=1 SV=1	MULTI-MSMS		JACB153_3	MCF7 R10K8	428.54	3	425.207	1272.6	53463.4	-0.19124	0.10943	-0.081802	425.542	428.543	31.167	14.391	0.52555	31.167	30.891	31.417	0		0	0	0	0.024518	1	10196	60.598	60.598	1	80.847	26.006	0
SYELPDGQVITIGNER	16	0	1	Unmodified	_SYELPDGQVITIGNER_			0	0	CON__P60712;P60709;Q6S8J3;A5A3E0;Q9BYX7;Q562R1;P68032;P68133;P62736;P63267;A6NL76;Q5T8M8;Q5T8M7;P63267-2;P63261	CON__P60712;P68032;P63261	CON__P60712	ACTB;POTEE;POTEF;POTEKP;ACTBL2;ACTC1;ACTA1;ACTA2;ACTG2;ACTG1	Actin, cytoplasmic 1;Actin, cytoplasmic 1, N-terminally processed;POTE ankyrin domain family member E;POTE ankyrin domain family member F;Putative beta-actin-like protein 3;Beta-actin-like protein 2;Actin, alpha cardiac muscle 1;Actin, alpha skeletal muscle;Actin, aortic smooth muscle;Actin, gamma-enteric smooth muscle;Actin, cytoplasmic 2;Actin, cytoplasmic 2, N-terminally processed	>P60712 SWISS-PROT:P60712 (Bos taurus) Actin, cytoplasmic 1;>sp|P60709|ACTB_HUMAN Actin, cytoplasmic 1 OS=Homo sapiens GN=ACTB PE=1 SV=1;>sp|Q6S8J3|POTEE_HUMAN POTE ankyrin domain family member E OS=Homo sapiens GN=POTEE PE=1 SV=3;>sp|A5A3E0|POTEF_HUMAN PO	MULTI-MSMS		JACB153_3	MCF7 R10K8	900.95	2	895.95	1789.88	36830.1	-0.68559	0.18308	-0.50251	896.452	900.954	55.392	22.465	1.0102	55.392	54.917	55.927	0		0	0	0	1.6232e-10	4	20473	186.85	180.96	1	80.97	15.282	0
LMIEMDGTENK	11	1	0	Unmodified	_LMIEMDGTENK_			0	0	P06733;K7EM90	P06733	P06733	ENO1	Alpha-enolase	>sp|P06733|ENOA_HUMAN Alpha-enolase OS=Homo sapiens GN=ENO1 PE=1 SV=2;>tr|K7EM90|K7EM90_HUMAN Enolase (Fragment) OS=Homo sapiens GN=ENO1 PE=1 SV=1	MULTI-MSMS		JACB153_3	MCF7 R10K8	644.8	2	640.797	1279.58	42802	-0.20533	-1.0546	-1.2599	640.795	644.804	37.632	16.543	0.82524	37.632	37.39	38.215	0		0	0	0	0.00033489	2	13035	133.91	130.59	1	81.232	20.318	0
DLAGCIHGLSNVK	13	1	0	Unmodified	_DLAGCIHGLSNVK_			0	0	P48735;B4DFL2;B4DSZ6	P48735	P48735	IDH2	Isocitrate dehydrogenase [NADP], mitochondrial;Isocitrate dehydrogenase [NADP]	>sp|P48735|IDHP_HUMAN Isocitrate dehydrogenase [NADP], mitochondrial OS=Homo sapiens GN=IDH2 PE=1 SV=2;>tr|B4DFL2|B4DFL2_HUMAN Isocitrate dehydrogenase [NADP] OS=Homo sapiens GN=IDH2 PE=1 SV=1;>tr|B4DSZ6|B4DSZ6_HUMAN Isocitrate dehydrogenase [NADP], mitoch	MULTI-MSMS		JACB153_3	MCF7 R10K8	464.58	3	461.906	1382.7	51041.5	-0.71539	0.40855	-0.30685	461.906	464.578	39.132	17.045	0.35381	39.132	38.955	39.309	-3.8147e-06		0	0	0	0.0079807	1	13710	72.891	72.891	1	81.41	22.528	0
NPDDITQEEYGEFYK	15	1	0	Unmodified	_NPDDITQEEYGEFYK_			0	0	P08238	P08238	P08238	HSP90AB1	Heat shock protein HSP 90-beta	>sp|P08238|HS90B_HUMAN Heat shock protein HSP 90-beta OS=Homo sapiens GN=HSP90AB1 PE=1 SV=4	MULTI-MSMS		JACB153_3	MCF7 R10K8	928.41	2	924.402	1846.79	36773.3	-1.0924	0.070342	-1.0221	924.905	928.409	47.002	19.668	0.67505	47.002	46.725	47.4	3.8147e-06		0	0	0	7.6359e-42	2	17037	315.13	315.13	1	81.701	17.905	0
HVFGESDELIGQK	13	1	0	Unmodified	_HVFGESDELIGQK_			0	0	P60174;P60174-1;P60174-4;U3KPZ0;U3KQF3;U3KPS5	P60174	P60174	TPI1	Triosephosphate isomerase	>sp|P60174|TPIS_HUMAN Triosephosphate isomerase OS=Homo sapiens GN=TPI1 PE=1 SV=3;>sp|P60174-1|TPIS_HUMAN Isoform 2 of Triosephosphate isomerase OS=Homo sapiens GN=TPI1;>sp|P60174-4|TPIS_HUMAN Isoform 4 of Triosephosphate isomerase OS=Homo sapiens GN=TPI1;	MULTI-MSMS		JACB153_3	MCF7 R10K8	489.58	3	486.912	1457.72	50273.3	-0.12091	-0.86206	-0.98297	487.247	489.583	32.297	14.762	0.80762	32.297	32	32.807	0		0	0	0	9.0074e-10	1	10666	192.3	192.3	1	81.79	19.766	0
VLAGLIR	7	0	1	Unmodified	_VLAGLIR_			0	0	Q86VV8;Q86VV8-3;C9JTR3;Q86VV8-4;Q86VV8-2;J3KTD2	Q86VV8	Q86VV8	RTTN	Rotatin	>sp|Q86VV8|RTTN_HUMAN Rotatin OS=Homo sapiens GN=RTTN PE=1 SV=3;>sp|Q86VV8-3|RTTN_HUMAN Isoform 3 of Rotatin OS=Homo sapiens GN=RTTN;>tr|C9JTR3|C9JTR3_HUMAN Rotatin OS=Homo sapiens GN=RTTN PE=1 SV=1;>sp|Q86VV8-4|RTTN_HUMAN Isoform 4 of Rotatin OS=Homo sapi	MULTI-MSMS		JACB153_3	MCF7 R10K8	376.26	2	371.253	740.491	58257.4	0.097764	-0.46597	-0.3682	371.252	376.257	36.691	16.233	0.58975	36.691	36.471	37.061	0		0	0	0	0.0078598	1	12633	92.692	0	1	81.917	27.745	0
EILVGDVGQTVDDPYATFVK	20	1	0	Unmodified	_EILVGDVGQTVDDPYATFVK_			0	0	E9PK25;P23528;G3V1A4;E9PP50;E9PQB7;E9PS23;E9PLJ3	E9PK25	E9PK25	CFL1	Cofilin-1	>tr|E9PK25|E9PK25_HUMAN Cofilin-1 OS=Homo sapiens GN=CFL1 PE=1 SV=1;>sp|P23528|COF1_HUMAN Cofilin-1 OS=Homo sapiens GN=CFL1 PE=1 SV=3;>tr|G3V1A4|G3V1A4_HUMAN Cofilin 1 (Non-muscle), isoform CRA_a OS=Homo sapiens GN=CFL1 PE=1 SV=1;>tr|E9PP50|E9PP50_HUMAN Co	MULTI-MSMS		JACB153_3	MCF7 R10K8	1088.06	2	1083.55	2165.09	33946.6	-0.86694	-0.34198	-1.2089	1084.05	1088.06	65.227	25.745	0.61902	65.227	64.937	65.556	0		0	0	0	2.2642e-17	1	24135	214.69	198.46	1	82.305	18.96	0
IIPGFMCQGGDFTR	14	0	1	Unmodified	_IIPGFMCQGGDFTR_			0	0	P62937;C9J5S7;F8WE65;F5H284;Q9Y536	P62937	P62937	PPIA;PPIAL4D;PPIAL4A	Peptidyl-prolyl cis-trans isomerase A;Peptidyl-prolyl cis-trans isomerase;Peptidyl-prolyl cis-trans isomerase A-like 4A/B/C	>sp|P62937|PPIA_HUMAN Peptidyl-prolyl cis-trans isomerase A OS=Homo sapiens GN=PPIA PE=1 SV=2;>tr|C9J5S7|C9J5S7_HUMAN Peptidyl-prolyl cis-trans isomerase OS=Homo sapiens GN=PPIA PE=1 SV=1;>tr|F8WE65|F8WE65_HUMAN Peptidyl-prolyl cis-trans isomerase OS=Homo	MULTI-MSMS		JACB153_3	MCF7 R10K8	804.88	2	799.876	1597.74	38171.1	-0.71683	0.038614	-0.67822	799.878	804.881	53.41	21.805	0.96553	53.41	53.106	54.072	0		0	0	0	3.271e-07	3	19606	166.38	162	1	82.375	17.465	0
TAFDEAIAELDTLSEESYK	19	1	0	Unmodified	_TAFDEAIAELDTLSEESYK_			0	0	P63104;E7EX29;B0AZS6;P63104-2;H0YB80;B7Z2E6	P63104	P63104	YWHAZ	14-3-3 protein zeta/delta	>sp|P63104|1433Z_HUMAN 14-3-3 protein zeta/delta OS=Homo sapiens GN=YWHAZ PE=1 SV=1;>tr|E7EX29|E7EX29_HUMAN 14-3-3 protein zeta/delta (Fragment) OS=Homo sapiens GN=YWHAZ PE=1 SV=1;>tr|B0AZS6|B0AZS6_HUMAN 14-3-3 protein zeta/delta OS=Homo sapiens GN=YWHAZ P	MULTI-MSMS		JACB153_3	MCF7 R10K8	1071.01	2	1066.5	2130.98	33874.4	-0.40744	-0.1812	-0.58864	1067	1071.01	83.92	31.971	1.2488	83.92	83.331	84.58	0		0	0	0	9.3336e-22	3	30759	246.45	246.45	1	82.498	21.019	0
DISLSDYK	8	1	0	Unmodified	_DISLSDYK_			0	0	Q06830	Q06830	Q06830	PRDX1	Peroxiredoxin-1	>sp|Q06830|PRDX1_HUMAN Peroxiredoxin-1 OS=Homo sapiens GN=PRDX1 PE=1 SV=1	MULTI-MSMS		JACB153_3	MCF7 R10K8	474.74	2	470.735	939.455	50716.1	0.23377	0.19904	0.43281	470.735	474.742	36.725	16.241	0.98867	36.725	36.307	37.295	0		0	0	0	0.0068558	2	12622	80.438	16.174	1	82.54	20.772	0
SLGSVQAPSYGAR	13	0	1	Unmodified	_SLGSVQAPSYGAR_			0	0	P05783;F8VZY9	P05783	P05783	KRT18	Keratin, type I cytoskeletal 18	>sp|P05783|K1C18_HUMAN Keratin, type I cytoskeletal 18 OS=Homo sapiens GN=KRT18 PE=1 SV=2;>tr|F8VZY9|F8VZY9_HUMAN Keratin, type I cytoskeletal 18 OS=Homo sapiens GN=KRT18 PE=1 SV=1	MULTI-MSMS		JACB153_3	MCF7 R10K8	651.84	2	646.833	1291.65	43253.9	-0.45539	-0.15382	-0.60921	646.834	651.838	29.828	13.94	0.92266	29.828	29.547	30.47	0		0	0	0	2.1841e-07	3	9559	184.34	149.59	1	82.546	16.378	0
DGLLPENTFIVGYAR	15	0	1	Unmodified	_DGLLPENTFIVGYAR_			0	0	P11413-2;P11413-3;P11413;E7EUI8;E7EM57;E9PD92	P11413-2	P11413-2	G6PD	Glucose-6-phosphate 1-dehydrogenase	>sp|P11413-2|G6PD_HUMAN Isoform Long of Glucose-6-phosphate 1-dehydrogenase OS=Homo sapiens GN=G6PD;>sp|P11413-3|G6PD_HUMAN Isoform 3 of Glucose-6-phosphate 1-dehydrogenase OS=Homo sapiens GN=G6PD;>sp|P11413|G6PD_HUMAN Glucose-6-phosphate 1-dehydrogenase O	MULTI-MSMS		JACB153_3	MCF7 R10K8	837.94	2	832.936	1663.86	38477.2	-0.53755	0.078964	-0.45859	832.935	837.94	68.907	26.968	0.55965	68.907	68.634	69.194	0		0	0	0	1.906e-05	2	25461	103.21	103.21	1	82.74	21.793	0
QLIVGVNK	8	1	0	Unmodified	_QLIVGVNK_			0	0	Q05639;P68104;Q5VTE0	Q05639;P68104	P68104	EEF1A2;EEF1A1;EEF1A1P5	Elongation factor 1-alpha 2;Elongation factor 1-alpha 1;Putative elongation factor 1-alpha-like 3	>sp|Q05639|EF1A2_HUMAN Elongation factor 1-alpha 2 OS=Homo sapiens GN=EEF1A2 PE=1 SV=1;>sp|P68104|EF1A1_HUMAN Elongation factor 1-alpha 1 OS=Homo sapiens GN=EEF1A1 PE=1 SV=1;>sp|Q5VTE0|EF1A3_HUMAN Putative elongation factor 1-alpha-like 3 OS=Homo sapiens G	MULTI-MSMS		JACB153_3	MCF7 R10K8	439.78	2	435.774	869.533	52305.8	-0.71379	0.32201	-0.39178	435.774	439.781	27.724	13.245	0.62219	27.724	27.522	28.145	1.9073e-06		0	0	0	0.0025334	1	8648	98.997	31.962	1	82.789	19.054	0
AEEQPQVELFVK	12	1	0	Acetyl (Protein N-term)	_(ac)AEEQPQVELFVK_			1	0	O00299	O00299	O00299	CLIC1	Chloride intracellular channel protein 1	>sp|O00299|CLIC1_HUMAN Chloride intracellular channel protein 1 OS=Homo sapiens GN=CLIC1 PE=1 SV=4	MULTI-MSMS		JACB153_3	MCF7 R10K8	733.88	2	729.877	1457.74	41949.1	-0.24097	-0.25419	-0.49516	730.38	733.885	62.982	24.992	0.61684	62.982	62.713	63.33	0		0	0	0	0.0032372	1	23307	86.288	77	1	82.798	24.521	0
CMPTFQFFK	9	1	0	Unmodified	_CMPTFQFFK_			0	0	P10599;P10599-2	P10599	P10599	TXN	Thioredoxin	>sp|P10599|THIO_HUMAN Thioredoxin OS=Homo sapiens GN=TXN PE=1 SV=3;>sp|P10599-2|THIO_HUMAN Isoform 2 of Thioredoxin OS=Homo sapiens GN=TXN	MULTI-MSMS		JACB153_3	MCF7 R10K8	607.28	2	603.278	1204.54	44511.7	0.065611	-0.97917	-0.91356	603.278	607.285	58.922	23.641	0.69663	58.922	58.673	59.37	3.8147e-06		0	0	0	0.0054088	1	21814	78.934	78.029	1	82.809	20.492	0
NQVAMNPTNTVFDAK	15	1	0	Unmodified	_NQVAMNPTNTVFDAK_			0	0	P11142;E9PKE3;P11142-2;E9PNE6;E9PLF4;E9PQK7;E9PQQ4;E9PPY6;E9PN25;E9PK54	P11142;E9PK54	P11142	HSPA8	Heat shock cognate 71 kDa protein	>sp|P11142|HSP7C_HUMAN Heat shock cognate 71 kDa protein OS=Homo sapiens GN=HSPA8 PE=1 SV=1;>tr|E9PKE3|E9PKE3_HUMAN Heat shock cognate 71 kDa protein OS=Homo sapiens GN=HSPA8 PE=1 SV=1;>sp|P11142-2|HSP7C_HUMAN Isoform 2 of Heat shock cognate 71 kDa protein	MULTI-MSMS		JACB153_3	MCF7 R10K8	829.91	2	825.401	1648.79	38390.8	-0.43518	-0.34445	-0.77963	825.401	829.408	40.54	17.51	0.7226	40.54	40.318	41.041	0		0	0	0	3.649e-12	1	14295	202.25	184.15	1	82.85	18.191	0
GDLGIEIPAEK	11	1	0	Unmodified	_GDLGIEIPAEK_			0	0	P14618;P14618-3;P30613;P30613-2;P14618-2;H3BTN5;Q504U3	P14618;P14618-2	P14618	PKM2;PKLR	Pyruvate kinase isozymes M1/M2;Pyruvate kinase isozymes R/L;Pyruvate kinase	>sp|P14618|KPYM_HUMAN Pyruvate kinase PKM OS=Homo sapiens GN=PKM PE=1 SV=4;>sp|P14618-3|KPYM_HUMAN Isoform 3 of Pyruvate kinase PKM OS=Homo sapiens GN=PKM;>sp|P30613|KPYR_HUMAN Pyruvate kinase PKLR OS=Homo sapiens GN=PKLR PE=1 SV=2;>sp|P30613-2|KPYR_HUMAN	MULTI-MSMS		JACB153_3	MCF7 R10K8	575.32	2	571.309	1140.6	45929.1	0.039053	0.1205	0.15955	571.309	575.316	44.159	18.717	0.91697	44.159	43.729	44.646	0		0	0	0	0.0069995	2	15951	79.23	46.976	1	82.853	16.458	0
FVSISDLLVPK	11	1	0	Unmodified	_FVSISDLLVPK_			0	0	E7EU23;P50395;P50395-2	E7EU23	E7EU23	GDI2	Rab GDP dissociation inhibitor beta	>tr|E7EU23|E7EU23_HUMAN Rab GDP dissociation inhibitor beta OS=Homo sapiens GN=GDI2 PE=1 SV=1;>sp|P50395|GDIB_HUMAN Rab GDP dissociation inhibitor beta OS=Homo sapiens GN=GDI2 PE=1 SV=2;>sp|P50395-2|GDIB_HUMAN Isoform 2 of Rab GDP dissociation inhibitor be	MULTI-MSMS		JACB153_3	MCF7 R10K8	613.37	2	609.361	1216.71	45271.8	0.01512	0.081408	0.096528	609.361	613.368	67.569	26.518	0.87408	67.569	67.283	68.157	0		0	0	0	0.0015991	2	24973	91.937	65.82	1	82.913	22.978	0
ALGLGVEQLPVVFEDVVLHQATILPK	26	1	0	Unmodified	_ALGLGVEQLPVVFEDVVLHQATILPK_			0	0	P49327	P49327	P49327	FASN	Fatty acid synthase;[Acyl-carrier-protein] S-acetyltransferase;[Acyl-carrier-protein] S-malonyltransferase;3-oxoacyl-[acyl-carrier-protein] synthase;3-oxoacyl-[acyl-carrier-protein] reductase;3-hydroxypalmitoyl-[acyl-carrier-protein] dehydratase;Enoyl-[acyl-carrier-protein] reductase;Oleoyl-[acyl-carrier-protein] hydrolase	>sp|P49327|FAS_HUMAN Fatty acid synthase OS=Homo sapiens GN=FASN PE=1 SV=3	MULTI-MSMS		JACB153_3	MCF7 R10K8	932.21	3	929.2	2784.58	36885.8	-0.46492	-0.010226	-0.47514	929.535	932.206	90.267	34.089	1.0832	90.267	89.825	90.908	0		0	0	0	7.7052e-26	2	33071	189.64	189.64	1	83.052	24.335	0
VVLAYEPVWAIGTGK	15	1	0	Unmodified	_VVLAYEPVWAIGTGK_			0	0	P60174;P60174-1;P60174-4;U3KPZ0;U3KQF3	P60174	P60174	TPI1	Triosephosphate isomerase	>sp|P60174|TPIS_HUMAN Triosephosphate isomerase OS=Homo sapiens GN=TPI1 PE=1 SV=3;>sp|P60174-1|TPIS_HUMAN Isoform 2 of Triosephosphate isomerase OS=Homo sapiens GN=TPI1;>sp|P60174-4|TPIS_HUMAN Isoform 4 of Triosephosphate isomerase OS=Homo sapiens GN=TPI1;	MULTI-MSMS		JACB153_3	MCF7 R10K8	805.96	2	801.948	1601.88	39538.4	-0.4711	0.3244	-0.14671	801.949	805.955	63.621	25.202	0.66308	63.621	63.396	64.059	0		0	0	0	1.8814e-06	2	23592	123.38	123.38	1	83.09	17.102	0
DICNDVLSLLEK	12	1	0	Unmodified	_DICNDVLSLLEK_			0	0	P63104;E7EX29;B0AZS6;E7ESK7	P63104	P63104	YWHAZ	14-3-3 protein zeta/delta	>sp|P63104|1433Z_HUMAN 14-3-3 protein zeta/delta OS=Homo sapiens GN=YWHAZ PE=1 SV=1;>tr|E7EX29|E7EX29_HUMAN 14-3-3 protein zeta/delta (Fragment) OS=Homo sapiens GN=YWHAZ PE=1 SV=1;>tr|B0AZS6|B0AZS6_HUMAN 14-3-3 protein zeta/delta OS=Homo sapiens GN=YWHAZ P	MULTI-MSMS		JACB153_3	MCF7 R10K8	713.87	2	709.863	1417.71	41273.4	0.17204	-0.72888	-0.55683	709.864	713.87	79.715	30.574	1.7622	79.715	79.335	81.097	0		0	0	0	6.5183e-05	3	29392	139.89	139.89	1	83.243	17.74	0
FDLMYAK	7	1	0	Unmodified	_FDLMYAK_			0	0	Q71U36;Q71U36-2;Q13748;Q6PEY2;V9GZ17;F5H5D3;Q9BQE3;P68366;A8MUB1;P68363;CON__ENSEMBL:ENSBTAP00000016242;A6NHL2;A6NHL2-2	Q71U36;F5H5D3;P68366;P68363;A6NHL2	P68363	TUBA1A;TUBA3C;TUBA3E;TUBA1C;TUBA4A;TUBA1B;TUBAL3	Tubulin alpha-1A chain;Tubulin alpha-3C/D chain;Tubulin alpha-3E chain;Tubulin alpha-1C chain;Tubulin alpha-4A chain;Tubulin alpha-1B chain;Tubulin alpha chain-like 3	>sp|Q71U36|TBA1A_HUMAN Tubulin alpha-1A chain OS=Homo sapiens GN=TUBA1A PE=1 SV=1;>sp|Q71U36-2|TBA1A_HUMAN Isoform 2 of Tubulin alpha-1A chain OS=Homo sapiens GN=TUBA1A;>sp|Q13748|TBA3C_HUMAN Tubulin alpha-3C/D chain OS=Homo sapiens GN=TUBA3C PE=1 SV=3;>sp	MULTI-MSMS		JACB153_3	MCF7 R10K8	448.23	2	444.22	886.426	51798.7	-1.3513	0.26099	-1.0903	444.221	448.228	42.332	18.109	0.68748	42.332	42.07	42.757	-3.8147e-06		0	0	0	0.017328	2	15044	68.915	38.73	1	83.265	18.829	0
MSVQPTVSLGGFEITPPVVLR	21	0	1	Unmodified	_MSVQPTVSLGGFEITPPVVLR_			0	0	P06748;P06748-2;P06748-3;E5RI98	P06748	P06748	NPM1	Nucleophosmin	>sp|P06748|NPM_HUMAN Nucleophosmin OS=Homo sapiens GN=NPM1 PE=1 SV=2;>sp|P06748-2|NPM_HUMAN Isoform 2 of Nucleophosmin OS=Homo sapiens GN=NPM1;>sp|P06748-3|NPM_HUMAN Isoform 3 of Nucleophosmin OS=Homo sapiens GN=NPM1;>tr|E5RI98|E5RI98_HUMAN Nucleophosmin (	MULTI-MSMS		JACB153_3	MCF7 R10K8	1119.62	2	1114.11	2226.21	33320.8	-0.51864	-0.31483	-0.83347	1114.61	1119.62	76.145	29.383	0.68423	76.145	75.804	76.488	0		0	0	0	2.6269e-12	2	28137	144.92	144.92	1	83.372	22.329	0
LTGMAFR	7	0	1	Unmodified	_LTGMAFR_			0	0	P04406;P04406-2;E7EUT5;O14556	P04406	P04406	GAPDH;GAPDHS	Glyceraldehyde-3-phosphate dehydrogenase;Glyceraldehyde-3-phosphate dehydrogenase, testis-specific	>sp|P04406|G3P_HUMAN Glyceraldehyde-3-phosphate dehydrogenase OS=Homo sapiens GN=GAPDH PE=1 SV=3;>sp|P04406-2|G3P_HUMAN Isoform 2 of Glyceraldehyde-3-phosphate dehydrogenase OS=Homo sapiens GN=GAPDH;>tr|E7EUT5|E7EUT5_HUMAN Glyceraldehyde-3-phosphate dehydr	MULTI-MSMS		JACB153_3	MCF7 R10K8	403.22	2	398.213	794.411	54564.6	-0.10148	-1.061	-1.1625	398.213	403.217	30.445	14.146	0.82989	30.445	30.212	31.042	0		0	0	0	0.012397	2	9847	81.297	69.928	1	83.462	17.458	0
EIVHLQAGQCGNQIGAK	17	1	0	Unmodified	_EIVHLQAGQCGNQIGAK_			0	0	P68371;M0R2D3;M0QZL7;M0QY85;M0QX14;M0QY37;M0R0X0;M0R2T4;P04350;M0R278;M0QYM7;M0R042	P68371;P04350	P68371	TUBB4B;TUBB4A	Tubulin beta-4B chain;Tubulin beta-4A chain	>sp|P68371|TBB4B_HUMAN Tubulin beta-4B chain OS=Homo sapiens GN=TUBB4B PE=1 SV=1;>tr|M0R2D3|M0R2D3_HUMAN Tubulin beta-4A chain (Fragment) OS=Homo sapiens GN=TUBB4A PE=2 SV=1;>tr|M0QZL7|M0QZL7_HUMAN Tubulin beta-4A chain (Fragment) OS=Homo sapiens GN=TUBB4A	MULTI-MSMS		JACB153_3	MCF7 R10K8	610.98	3	608.312	1821.92	43874.8	-0.5172	-0.86663	-1.3838	608.313	610.984	27.189	13.063	0.24092	27.189	27.049	27.29	1.9073e-06		0	0	0	1.9543e-09	1	8431	154.6	0	1	83.649	17.889	0
DWYPHSR	7	0	1	Unmodified	_DWYPHSR_			0	0	P04792;F8WE04	P04792	P04792	HSPB1	Heat shock protein beta-1	>sp|P04792|HSPB1_HUMAN Heat shock protein beta-1 OS=Homo sapiens GN=HSPB1 PE=1 SV=2;>tr|F8WE04|F8WE04_HUMAN Heat shock protein beta-1 OS=Homo sapiens GN=HSPB1 PE=1 SV=1	MULTI-MSMS		JACB153_3	MCF7 R10K8	486.23	2	480.72	959.425	50051.1	-0.1843	0.62064	0.43634	480.72	485.724	23.364	11.785	0.6396	23.364	23.018	23.658	0		0	0	0	0.089332	1	6675	37.558	37.558	1	83.806	23.451	0
SFYPEEVSSMVLTK	14	1	0	Unmodified	_SFYPEEVSSMVLTK_			0	0	P11142;E9PKE3;P11142-2;E9PN89;E9PLF4;E9PQK7;E9PQQ4;E9PPY6;E9PI65;E9PN25;E9PK54	P11142;E9PK54	P11142	HSPA8	Heat shock cognate 71 kDa protein	>sp|P11142|HSP7C_HUMAN Heat shock cognate 71 kDa protein OS=Homo sapiens GN=HSPA8 PE=1 SV=1;>tr|E9PKE3|E9PKE3_HUMAN Heat shock cognate 71 kDa protein OS=Homo sapiens GN=HSPA8 PE=1 SV=1;>sp|P11142-2|HSP7C_HUMAN Isoform 2 of Heat shock cognate 71 kDa protein	MULTI-MSMS		JACB153_3	MCF7 R10K8	812.9	2	808.897	1615.78	37949.1	-0.66694	0.39928	-0.26766	809.401	812.905	57.895	23.301	0.53486	57.895	57.65	58.185	0		0	0	0	4.6952e-05	1	21407	109.84	109.84	1	83.874	18.965	0
ASLSLAPVNIFK	12	1	0	Acetyl (Protein N-term)	_(ac)ASLSLAPVNIFK_			1	0	P78371;F5GWF6;F8VQ14	P78371	P78371	CCT2	T-complex protein 1 subunit beta	>sp|P78371|TCPB_HUMAN T-complex protein 1 subunit beta OS=Homo sapiens GN=CCT2 PE=1 SV=4;>tr|F5GWF6|F5GWF6_HUMAN T-complex protein 1 subunit beta OS=Homo sapiens GN=CCT2 PE=1 SV=2;>tr|F8VQ14|F8VQ14_HUMAN T-complex protein 1 subunit beta OS=Homo sapiens GN=	MULTI-MSMS		JACB153_3	MCF7 R10K8	655.38	2	651.377	1300.74	43281.5	-0.047415	-0.053443	-0.10086	651.879	655.384	82.728	31.574	0.55199	82.728	82.461	83.013	0		0	0	0	0.0001659	2	30380	110.66	100.87	1	83.898	26.197	0
TAFDEAIAELDTLNEDSYK	19	1	0	Unmodified	_TAFDEAIAELDTLNEDSYK_			0	0	P27348	P27348	P27348	YWHAQ	14-3-3 protein theta	>sp|P27348|1433T_HUMAN 14-3-3 protein theta OS=Homo sapiens GN=YWHAQ PE=1 SV=1	MULTI-MSMS		JACB153_3	MCF7 R10K8	718.67	3	715.667	2143.98	41472.9	0.1047	-0.23966	-0.13496	716.334	718.338	77.403	29.803	0.99255	77.403	76.893	77.885	7.6294e-06		0	0	0	1.3954e-16	2	28580	209.89	209.89	1	84.148	24.722	0
AGWNAYIDNLMADGTCQDAAIVGYK	25	1	0	Acetyl (Protein N-term)	_(ac)AGWNAYIDNLMADGTCQDAAIVGYK_			1	0	P07737;I3L3D5;CON__P02584	P07737	P07737	PFN1	Profilin-1	>sp|P07737|PROF1_HUMAN Profilin-1 OS=Homo sapiens GN=PFN1 PE=1 SV=2;>tr|I3L3D5|I3L3D5_HUMAN Profilin-1 (Fragment) OS=Homo sapiens GN=PFN1 PE=1 SV=1;>P02584 SWISS-PROT:P02584 (Bos taurus) Profilin-1	MULTI-MSMS		JACB153_3	MCF7 R10K8	923.43	3	920.42	2758.24	36532.1	-0.56119	-0.17904	-0.74023	920.754	923.425	94.854	46.873	1.1656	94.854	94.477	95.642	0		0	0	0	5.7483e-26	2	34635	190.79	190.79	1	84.257	22.815	0
CPEALFQPSFLGMESCGIHETTFNSIMK	28	1	0	Unmodified	_CPEALFQPSFLGMESCGIHETTFNSIMK_			0	0	CON__P60712;P60709;P63261	CON__P60712;P63261	CON__P60712	ACTB;ACTG1	Actin, cytoplasmic 1;Actin, cytoplasmic 1, N-terminally processed;Actin, cytoplasmic 2;Actin, cytoplasmic 2, N-terminally processed	>P60712 SWISS-PROT:P60712 (Bos taurus) Actin, cytoplasmic 1;>sp|P60709|ACTB_HUMAN Actin, cytoplasmic 1 OS=Homo sapiens GN=ACTB PE=1 SV=1;>sp|P63261|ACTG_HUMAN Actin, cytoplasmic 2 OS=Homo sapiens GN=ACTG1 PE=1 SV=1	MULTI-MSMS		JACB153_3	MCF7 R10K8	1080.83	3	1077.83	3230.45	33919.3	-0.70365	-0.6373	-1.341	1078.49	1080.83	69.617	27.21	1.062	69.617	69.26	70.323	0		0	0	0	5.7773e-27	2	25740	216.67	216.67	1	84.311	17.902	0
FGPGVAFR	8	0	1	Unmodified	_FGPGVAFR_			0	0	CON__P08727;P08727;C9JM50	CON__P08727	CON__P08727	KRT19	Keratin, type I cytoskeletal 19	>P08727 SWISS-PROT:P08727 Tax_Id=9606 Gene_Symbol=KRT19 Keratin, type I cytoskeletal 19;>sp|P08727|K1C19_HUMAN Keratin, type I cytoskeletal 19 OS=Homo sapiens GN=KRT19 PE=1 SV=4;>tr|C9JM50|C9JM50_HUMAN Keratin, type I cytoskeletal 19 (Fragment) OS=Homo sap	MULTI-MSMS		JACB153_3	MCF7 R10K8	425.73	2	425.732	849.45	53107.7	0.38089	0.17375	0.55464	425.732	430.736	37.08	16.363	1.3197	37.08	36.687	38.007	0		0	0	0	0.0020801	3	12830	120.65	96.013	1	84.415	16.884	0
LGEIVTTIPTIGFNVETVEYK	21	1	0	Unmodified	_LGEIVTTIPTIGFNVETVEYK_			0	0	P18085;C9JPM4;P84085;C9J1Z8;P84077;F5H423;F5H0C7;P61204	P18085;P84085;P84077;P61204	P84077	ARF4;ARF5;ARF1;ARF3	ADP-ribosylation factor 4;ADP-ribosylation factor 5;ADP-ribosylation factor 1;ADP-ribosylation factor 3	>sp|P18085|ARF4_HUMAN ADP-ribosylation factor 4 OS=Homo sapiens GN=ARF4 PE=1 SV=3;>tr|C9JPM4|C9JPM4_HUMAN ADP-ribosylation factor 4 (Fragment) OS=Homo sapiens GN=ARF4 PE=1 SV=1;>sp|P84085|ARF5_HUMAN ADP-ribosylation factor 5 OS=Homo sapiens GN=ARF5 PE=1 SV	MULTI-MSMS		JACB153_3	MCF7 R10K8	1166.63	2	1162.13	2322.24	32515.4	-0.21847	-0.28774	-0.50622	1162.63	1166.63	74.29	28.766	0.6076	74.29	74.074	74.681	0		0	0	0	5.9395e-12	1	27408	130.25	130.25	1	84.77	23.604	0
SVTEQGAELSNEER	14	0	1	Unmodified	_SVTEQGAELSNEER_			0	0	P63104;E7EX29;E7ESK7;E7EVZ2;E9PD24;E5RIR4;E5RGE1	P63104	P63104	YWHAZ	14-3-3 protein zeta/delta	>sp|P63104|1433Z_HUMAN 14-3-3 protein zeta/delta OS=Homo sapiens GN=YWHAZ PE=1 SV=1;>tr|E7EX29|E7EX29_HUMAN 14-3-3 protein zeta/delta (Fragment) OS=Homo sapiens GN=YWHAZ PE=1 SV=1;>tr|E7ESK7|E7ESK7_HUMAN 14-3-3 protein zeta/delta (Fragment) OS=Homo sapiens	MULTI-MSMS		JACB153_3	MCF7 R10K8	520.25	3	516.909	1547.71	48911.8	0.21568	0.19686	0.41254	517.242	520.246	23.246	11.749	0.29452	23.246	23.095	23.389	0		0	0	0	4.5774e-06	1	6681	148.48	148.48	1	84.849	28.164	0
DAEAWFTSR	9	0	1	Unmodified	_DAEAWFTSR_			0	0	CON__P08727;P08727;K7EMS3	CON__P08727	CON__P08727	KRT19	Keratin, type I cytoskeletal 19	>P08727 SWISS-PROT:P08727 Tax_Id=9606 Gene_Symbol=KRT19 Keratin, type I cytoskeletal 19;>sp|P08727|K1C19_HUMAN Keratin, type I cytoskeletal 19 OS=Homo sapiens GN=KRT19 PE=1 SV=4;>tr|K7EMS3|K7EMS3_HUMAN Keratin, type I cytoskeletal 19 (Fragment) OS=Homo sap	MULTI-MSMS		JACB153_3	MCF7 R10K8	546.75	2	541.749	1081.48	47521.2	-0.089556	-0.025669	-0.11523	541.749	546.753	47.472	19.825	1.3042	47.472	47.074	48.378	0		0	0	0	0.00032454	3	17332	140.75	138.7	1	85.413	19.288	0
TTPSYVAFTDTER	13	0	1	Unmodified	_TTPSYVAFTDTER_			0	0	P11142;E9PKE3;P11142-2;E9PNE6;E9PLF4;E9PQK7;E9PQQ4;E9PPY6;E9PI65;E9PN25;P54652;P17066;P48741;E9PK54;P08107;P08107-2	P11142;P54652;P17066;E9PK54;P08107	P11142	HSPA8;HSPA2;HSPA6;HSPA7;HSPA1A	Heat shock cognate 71 kDa protein;Heat shock-related 70 kDa protein 2;Heat shock 70 kDa protein 6;Putative heat shock 70 kDa protein 7;Heat shock 70 kDa protein 1A/1B	>sp|P11142|HSP7C_HUMAN Heat shock cognate 71 kDa protein OS=Homo sapiens GN=HSPA8 PE=1 SV=1;>tr|E9PKE3|E9PKE3_HUMAN Heat shock cognate 71 kDa protein OS=Homo sapiens GN=HSPA8 PE=1 SV=1;>sp|P11142-2|HSP7C_HUMAN Isoform 2 of Heat shock cognate 71 kDa protein	MULTI-MSMS		JACB153_3	MCF7 R10K8	749.36	2	744.354	1486.69	40515.1	-0.9806	-0.35001	-1.3306	744.354	749.358	39.779	17.263	0.78492	39.779	39.5	40.285	0		0	0	0	4.3309e-05	2	14107	136.3	109.2	1	85.541	20.508	0
IIPGFMCQGGDFTR	14	0	1	Unmodified	_IIPGFMCQGGDFTR_			0	0	P62937;C9J5S7;F8WE65;F5H284;Q9Y536	P62937	P62937	PPIA;PPIAL4D;PPIAL4A	Peptidyl-prolyl cis-trans isomerase A;Peptidyl-prolyl cis-trans isomerase;Peptidyl-prolyl cis-trans isomerase A-like 4A/B/C	>sp|P62937|PPIA_HUMAN Peptidyl-prolyl cis-trans isomerase A OS=Homo sapiens GN=PPIA PE=1 SV=2;>tr|C9J5S7|C9J5S7_HUMAN Peptidyl-prolyl cis-trans isomerase OS=Homo sapiens GN=PPIA PE=1 SV=1;>tr|F8WE65|F8WE65_HUMAN Peptidyl-prolyl cis-trans isomerase OS=Homo	MULTI-MSMS		JACB153_3	MCF7 R10K8	536.92	3	533.587	1597.74	47052.1	0.038637	0.40596	0.4446	533.588	536.923	53.404	21.805	0.53958	53.404	53.164	53.703	0		0	0	0	1.1617e-05	1	19638	134.61	129.24	1	85.598	29.23	0
LDIDSPPITAR	11	0	1	Unmodified	_LDIDSPPITAR_			0	0	P14618;H3BQ34;H3BTJ2;H3BUW1;H3BT25;H3BU13;H3BQZ3;H3BN34;P14618-2;H3BTN5	P14618;P14618-2	P14618	PKM2	Pyruvate kinase isozymes M1/M2;Pyruvate kinase	>sp|P14618|KPYM_HUMAN Pyruvate kinase PKM OS=Homo sapiens GN=PKM PE=1 SV=4;>tr|H3BQ34|H3BQ34_HUMAN Pyruvate kinase OS=Homo sapiens GN=PKM PE=1 SV=1;>tr|H3BTJ2|H3BTJ2_HUMAN Pyruvate kinase PKM (Fragment) OS=Homo sapiens GN=PKM PE=1 SV=1;>tr|H3BUW1|H3BUW1_HU	MULTI-MSMS		JACB153_3	MCF7 R10K8	604.33	2	599.327	1196.64	44878.8	-0.51696	-0.12064	-0.63761	599.328	604.331	41.449	17.817	0.85918	41.449	41.016	41.875	0		0	0	0	2.0474e-05	2	14722	155.97	122.88	1	85.772	18.597	0
ALMDEVVK	8	1	0	Unmodified	_ALMDEVVK_			0	0	P00558;B7Z7A9;E7ERH5	P00558	P00558	PGK1	Phosphoglycerate kinase 1;Phosphoglycerate kinase	>sp|P00558|PGK1_HUMAN Phosphoglycerate kinase 1 OS=Homo sapiens GN=PGK1 PE=1 SV=3;>tr|B7Z7A9|B7Z7A9_HUMAN Phosphoglycerate kinase OS=Homo sapiens GN=PGK1 PE=1 SV=1;>tr|E7ERH5|E7ERH5_HUMAN Phosphoglycerate kinase OS=Homo sapiens GN=PGK1 PE=1 SV=1	MULTI-MSMS		JACB153_3	MCF7 R10K8	456.75	2	452.744	903.474	50713.2	-0.36432	0.20695	-0.15737	452.744	456.751	35.492	15.833	0.46754	35.492	35.265	35.733	0		0	0	0	0.012199	1	12089	63.419	33.609	1	85.869	20.803	0
IAILGFAFK	9	1	0	Unmodified	_IAILGFAFK_			0	0	O60701;O60701-2;O60701-3	O60701	O60701	UGDH	UDP-glucose 6-dehydrogenase	>sp|O60701|UGDH_HUMAN UDP-glucose 6-dehydrogenase OS=Homo sapiens GN=UGDH PE=1 SV=1;>sp|O60701-2|UGDH_HUMAN Isoform 2 of UDP-glucose 6-dehydrogenase OS=Homo sapiens GN=UGDH;>sp|O60701-3|UGDH_HUMAN Isoform 3 of UDP-glucose 6-dehydrogenase OS=Homo sapiens GN	MULTI-MSMS		JACB153_3	MCF7 R10K8	494.31	2	490.302	978.59	50075	0.15843	-0.11762	0.040814	490.302	494.309	67.094	26.366	0.62651	67.094	66.819	67.446	0		0	0	0	0.0010603	1	24849	96.711	42.302	1	85.885	26.172	0
GLSEDTTEETLK	12	1	0	Unmodified	_GLSEDTTEETLK_			0	0	P19338;H7BY16	P19338	P19338	NCL	Nucleolin	>sp|P19338|NUCL_HUMAN Nucleolin OS=Homo sapiens GN=NCL PE=1 SV=3;>tr|H7BY16|H7BY16_HUMAN Nucleolin (Fragment) OS=Homo sapiens GN=NCL PE=1 SV=2	MULTI-MSMS		JACB153_3	MCF7 R10K8	665.83	2	661.82	1321.62	43823.6	-0.86698	-0.16633	-1.0333	661.82	665.827	27.189	13.063	0.42405	27.189	27.006	27.43	0		0	0	0	1.3121e-05	1	8410	153.95	153.95	1	85.951	22.767	0
VGLQVVAVK	9	1	0	Unmodified	_VGLQVVAVK_			0	0	P10809	P10809	P10809	HSPD1	60 kDa heat shock protein, mitochondrial	>sp|P10809|CH60_HUMAN 60 kDa heat shock protein, mitochondrial OS=Homo sapiens GN=HSPD1 PE=1 SV=2	MULTI-MSMS		JACB153_3	MCF7 R10K8	460.8	2	456.797	911.58	51626	-0.3197	0.31039	-0.0093145	456.797	460.805	35.377	15.792	0.60854	35.377	35.203	35.811	0		0	0	0	0.00066521	1	12036	122.52	122.52	1	85.996	20.421	0
NIPGITLLNVSK	12	1	0	Unmodified	_NIPGITLLNVSK_			0	0	P36578;H3BM89	P36578	P36578	RPL4	60S ribosomal protein L4	>sp|P36578|RL4_HUMAN 60S ribosomal protein L4 OS=Homo sapiens GN=RPL4 PE=1 SV=5;>tr|H3BM89|H3BM89_HUMAN 60S ribosomal protein L4 OS=Homo sapiens GN=RPL4 PE=1 SV=1	MULTI-MSMS		JACB153_3	MCF7 R10K8	638.89	2	634.882	1267.75	44474.5	-0.6222	0.31465	-0.30756	635.384	638.89	56.49	22.828	0.5966	56.49	56.299	56.895	0		0	0	0	0.0036329	1	20868	87.831	87.831	1	86.106	22.065	0
LIDDMVAQVLK	11	1	0	Unmodified	_LIDDMVAQVLK_			0	0	P48735;B4DFL2;B4DSZ6;H0YL11	P48735	P48735	IDH2	Isocitrate dehydrogenase [NADP], mitochondrial;Isocitrate dehydrogenase [NADP]	>sp|P48735|IDHP_HUMAN Isocitrate dehydrogenase [NADP], mitochondrial OS=Homo sapiens GN=IDH2 PE=1 SV=2;>tr|B4DFL2|B4DFL2_HUMAN Isocitrate dehydrogenase [NADP] OS=Homo sapiens GN=IDH2 PE=1 SV=1;>tr|B4DSZ6|B4DSZ6_HUMAN Isocitrate dehydrogenase [NADP], mitoch	MULTI-MSMS		JACB153_3	MCF7 R10K8	626.86	2	622.85	1243.68	43475.7	0.026794	0.34678	0.37357	622.849	626.857	62.227	24.738	0.59374	62.227	61.988	62.581	0		0	0	0	0.00057722	1	23034	113.69	113.69	1	86.435	24.599	0
GGGQIIPTAR	10	0	1	Unmodified	_GGGQIIPTAR_			0	0	P13639;Q15029;Q15029-2;K7EJ81;K7EP67;K7EJ74	P13639;Q15029	P13639	EEF2;EFTUD2	Elongation factor 2;116 kDa U5 small nuclear ribonucleoprotein component	>sp|P13639|EF2_HUMAN Elongation factor 2 OS=Homo sapiens GN=EEF2 PE=1 SV=4;>sp|Q15029|U5S1_HUMAN 116 kDa U5 small nuclear ribonucleoprotein component OS=Homo sapiens GN=EFTUD2 PE=1 SV=1;>sp|Q15029-2|U5S1_HUMAN Isoform 2 of 116 kDa U5 small nuclear ribonucl	MULTI-MSMS		JACB153_3	MCF7 R10K8	490.28	2	485.277	968.54	50190.7	-0.48784	0.45015	-0.037686	485.277	490.282	25.496	12.499	0.42605	25.496	25.257	25.683	0		0	0	0	0.0059879	1	7658	77.662	77.662	1	86.462	25.216	0
LASYLDR	7	0	1	Unmodified	_LASYLDR_			0	0	P05783;F8VZY9	P05783	P05783	KRT18	Keratin, type I cytoskeletal 18	>sp|P05783|K1C18_HUMAN Keratin, type I cytoskeletal 18 OS=Homo sapiens GN=KRT18 PE=1 SV=2;>tr|F8VZY9|F8VZY9_HUMAN Keratin, type I cytoskeletal 18 OS=Homo sapiens GN=KRT18 PE=1 SV=1	MULTI-MSMS		JACB153_3	MCF7 R10K8	424.23	2	419.227	836.439	53601	-0.133	1.2888	1.1558	419.228	424.232	26.013	12.672	0.97583	26.013	25.827	26.803	0		0	0	0	0.066732	2	8112	45.68	13.459	1	86.657	17.556	0
VIFGLFGK	8	1	0	Unmodified	_VIFGLFGK_			0	0	P23284	P23284	P23284	PPIB	Peptidyl-prolyl cis-trans isomerase B	>sp|P23284|PPIB_HUMAN Peptidyl-prolyl cis-trans isomerase B OS=Homo sapiens GN=PPIB PE=1 SV=2	MULTI-MSMS		JACB153_3	MCF7 R10K8	444.77	2	440.768	879.522	51786.3	-0.050194	-0.35932	-0.40952	440.768	444.775	58.899	23.632	0.73103	58.899	58.658	59.389	0		0	0	0	0.012178	2	21781	63.486	38.563	1	86.702	22.056	0
WGDEHIPGSPYR	12	0	1	Unmodified	_WGDEHIPGSPYR_			0	0	P21333;P21333-2;Q5HY54;E9PHF0	P21333	P21333	FLNA	Filamin-A	>sp|P21333|FLNA_HUMAN Filamin-A OS=Homo sapiens GN=FLNA PE=1 SV=4;>sp|P21333-2|FLNA_HUMAN Isoform 2 of Filamin-A OS=Homo sapiens GN=FLNA;>tr|Q5HY54|Q5HY54_HUMAN Filamin-A OS=Homo sapiens GN=FLNA PE=1 SV=1;>tr|E9PHF0|E9PHF0_HUMAN Filamin-A OS=Homo sapiens G	MULTI-MSMS		JACB153_3	MCF7 R10K8	475.23	3	471.89	1412.65	50920.9	-0.28457	-0.51471	-0.79928	471.89	475.226	32.905	14.967	0.52428	32.905	32.697	33.221	0		0	0	0	0.13215	1	10943	40.475	40.475	1	86.739	24.661	0
LLIVSNPVDILTYVAWK	17	1	0	Unmodified	_LLIVSNPVDILTYVAWK_			0	0	P00338-3;P00338;P00338-2;P00338-5;F5GXY2	P00338-3	P00338-3	LDHA	L-lactate dehydrogenase A chain	>sp|P00338-3|LDHA_HUMAN Isoform 3 of L-lactate dehydrogenase A chain OS=Homo sapiens GN=LDHA;>sp|P00338|LDHA_HUMAN L-lactate dehydrogenase A chain OS=Homo sapiens GN=LDHA PE=1 SV=2;>sp|P00338-2|LDHA_HUMAN Isoform 2 of L-lactate dehydrogenase A chain OS=Hom	MULTI-MSMS		JACB153_3	MCF7 R10K8	651.38	3	648.712	1943.11	43727.5	-0.18755	0.019949	-0.1676	648.712	651.383	91.95	34.651	1.0171	91.95	91.567	92.584	0		0	0	0	5.6216e-10	2	33661	159.18	0	1	86.967	25.728	0
LDPHNHVLYSNR	12	0	1	Unmodified	_LDPHNHVLYSNR_			0	0	P31948;G3XAD8;F5H0T1;F5H783;F5GXD8	P31948	P31948	STIP1	Stress-induced-phosphoprotein 1	>sp|P31948|STIP1_HUMAN Stress-induced-phosphoprotein 1 OS=Homo sapiens GN=STIP1 PE=1 SV=1;>tr|G3XAD8|G3XAD8_HUMAN Stress-induced-phosphoprotein 1 OS=Homo sapiens GN=STIP1 PE=1 SV=1;>tr|F5H0T1|F5H0T1_HUMAN Stress-induced-phosphoprotein 1 OS=Homo sapiens GN=	MULTI-MSMS		JACB153_3	MCF7 R10K8	369.44	4	366.939	1463.73	57025.1	-0.18655	0.52688	0.34033	366.939	369.441	17.956	9.9865	0.56408	17.956	17.781	18.345	0		0	0	0	0.00015093	1	4564	121.04	121.04	1	87.207	31.398	0
NIILEEGK	8	1	0	Unmodified	_NIILEEGK_			0	0	E9PK25;P23528;G3V1A4;E9PP50;E9PQB7;E9PS23;E9PLJ3	E9PK25	E9PK25	CFL1	Cofilin-1	>tr|E9PK25|E9PK25_HUMAN Cofilin-1 OS=Homo sapiens GN=CFL1 PE=1 SV=1;>sp|P23528|COF1_HUMAN Cofilin-1 OS=Homo sapiens GN=CFL1 PE=1 SV=3;>tr|G3V1A4|G3V1A4_HUMAN Cofilin 1 (Non-muscle), isoform CRA_a OS=Homo sapiens GN=CFL1 PE=1 SV=1;>tr|E9PP50|E9PP50_HUMAN Co	MULTI-MSMS		JACB153_3	MCF7 R10K8	462.27	2	458.261	914.507	51154.1	0.091778	-0.37354	-0.28176	458.261	462.268	28.497	13.501	0.4957	28.497	28.285	28.78	0		0	0	0	0.0064928	1	8989	81.594	21.795	1	87.258	20.33	0
EGGLGPLNIPLLADVTR	17	0	1	Unmodified	_EGGLGPLNIPLLADVTR_			0	0	P32119;A6NIW5	P32119	P32119	PRDX2	Peroxiredoxin-2	>sp|P32119|PRDX2_HUMAN Peroxiredoxin-2 OS=Homo sapiens GN=PRDX2 PE=1 SV=5;>tr|A6NIW5|A6NIW5_HUMAN Peroxiredoxin 2, isoform CRA_a OS=Homo sapiens GN=PRDX2 PE=1 SV=2	MULTI-MSMS		JACB153_3	MCF7 R10K8	872.99	2	867.991	1733.97	38103.6	-0.26607	-0.25872	-0.52479	868.493	872.995	79.936	30.641	0.67281	79.936	79.614	80.286	7.6294e-06		0	0	0	1.0097e-06	2	29378	112.82	112.82	1	87.534	32.928	0
GLFIIDGK	8	1	0	Unmodified	_GLFIIDGK_			0	0	P32119	P32119	P32119	PRDX2	Peroxiredoxin-2	>sp|P32119|PRDX2_HUMAN Peroxiredoxin-2 OS=Homo sapiens GN=PRDX2 PE=1 SV=5	MULTI-MSMS		JACB153_3	MCF7 R10K8	435.76	2	431.755	861.496	52414.2	0.11961	0.78762	0.90722	431.755	435.763	49.872	20.62	0.53941	49.872	49.611	50.15	0		0	0	0	0.0048481	1	18200	86.833	57.746	1	87.772	23.015	0
LAVNMVPFPR	10	0	1	Unmodified	_LAVNMVPFPR_			0	0	Q13509;Q13509-2;P07437;Q5JP53;Q5ST81;A6NNZ2;I3L2F9;P68371;Q3ZCM7;Q5SQY0;F5H0I4;Q13885;P04350;Q9BUF5;K7ESM5;Q9BVA1	Q13509;P07437;P68371;Q3ZCM7;Q13885;P04350;Q9BUF5;Q9BVA1	P68371	TUBB3;TUBB;TUBB4B;TUBB8;RP11-631M21.2;TUBB2A;TUBB4A;TUBB6;TUBB2B	Tubulin beta-3 chain;Tubulin beta chain;Tubulin beta-8 chain B;Tubulin beta-4B chain;Tubulin beta-8 chain;Tubulin beta-2A chain;Tubulin beta-4A chain;Tubulin beta-6 chain;Tubulin beta-2B chain	>sp|Q13509|TBB3_HUMAN Tubulin beta-3 chain OS=Homo sapiens GN=TUBB3 PE=1 SV=2;>sp|Q13509-2|TBB3_HUMAN Isoform 2 of Tubulin beta-3 chain OS=Homo sapiens GN=TUBB3;>sp|P07437|TBB5_HUMAN Tubulin beta chain OS=Homo sapiens GN=TUBB PE=1 SV=2;>tr|Q5JP53|Q5JP53_HU	MULTI-MSMS		JACB153_3	MCF7 R10K8	577.33	2	572.321	1142.63	46463.6	-0.13433	-0.19268	-0.32702	572.322	577.325	53.153	21.718	0.74217	53.153	52.884	53.626	0		0	0	0	0.0010349	3	19653	109.29	92.265	1	87.861	19.306	0
SIQFVDWCPTGFK	13	1	0	Unmodified	_SIQFVDWCPTGFK_			0	0	P68366;A8MUB1;P68363;CON__ENSEMBL:ENSBTAP00000016242	P68366;P68363	P68363	TUBA4A;TUBA1B	Tubulin alpha-4A chain;Tubulin alpha-1B chain	>sp|P68366|TBA4A_HUMAN Tubulin alpha-4A chain OS=Homo sapiens GN=TUBA4A PE=1 SV=1;>tr|A8MUB1|A8MUB1_HUMAN Tubulin alpha-4A chain OS=Homo sapiens GN=TUBA4A PE=1 SV=1;>sp|P68363|TBA1B_HUMAN Tubulin alpha-1B chain OS=Homo sapiens GN=TUBA1B PE=1 SV=1;>ENSEMBL:	MULTI-MSMS		JACB153_3	MCF7 R10K8	796.89	2	792.879	1583.74	39264.7	-0.58143	-0.42621	-1.0076	792.879	796.886	62.529	24.841	0.9726	62.529	62.144	63.117	-3.8147e-06		0	0	0	8.375e-06	2	23145	153.39	153.39	1	87.897	18.107	0
FPGQLNADLR	10	0	1	Unmodified	_FPGQLNADLR_			0	0	Q13509;Q13509-2;G3V2A3;P07437;Q5JP53;Q5ST81;A6NNZ2;I3L2F9;P68371;M0R2D3;Q3ZCM7;Q5SQY0;F5H0I4;Q13885;P04350;Q9BUF5;K7ESM5;Q9BVA1	Q13509;P07437;P68371;Q3ZCM7;Q13885;P04350;Q9BUF5;Q9BVA1	P68371	TUBB3;TUBB;TUBB4B;TUBB8;RP11-631M21.2;TUBB2A;TUBB4A;TUBB6;TUBB2B	Tubulin beta-3 chain;Tubulin beta chain;Tubulin beta-8 chain B;Tubulin beta-4B chain;Tubulin beta-8 chain;Tubulin beta-2A chain;Tubulin beta-4A chain;Tubulin beta-6 chain;Tubulin beta-2B chain	>sp|Q13509|TBB3_HUMAN Tubulin beta-3 chain OS=Homo sapiens GN=TUBB3 PE=1 SV=2;>sp|Q13509-2|TBB3_HUMAN Isoform 2 of Tubulin beta-3 chain OS=Homo sapiens GN=TUBB3;>tr|G3V2A3|G3V2A3_HUMAN Tubulin beta-3 chain (Fragment) OS=Homo sapiens GN=TUBB3 PE=1 SV=1;>sp|	MULTI-MSMS		JACB153_3	MCF7 R10K8	570.81	2	565.801	1129.59	45894.4	-0.25887	0.14077	-0.1181	565.801	570.805	39.698	17.233	1.2551	39.698	39.029	40.285	0		0	0	0	0.00024718	1	13890	147.74	113.21	1	87.924	22.84	0
TLNDELEIIEGMK	13	1	0	Unmodified	_TLNDELEIIEGMK_			0	0	P10809;E7ESH4;E7EXB4	P10809	P10809	HSPD1	60 kDa heat shock protein, mitochondrial	>sp|P10809|CH60_HUMAN 60 kDa heat shock protein, mitochondrial OS=Homo sapiens GN=HSPD1 PE=1 SV=2;>tr|E7ESH4|E7ESH4_HUMAN 60 kDa heat shock protein, mitochondrial (Fragment) OS=Homo sapiens GN=HSPD1 PE=1 SV=1;>tr|E7EXB4|E7EXB4_HUMAN 60 kDa heat shock prote	MULTI-MSMS		JACB153_3	MCF7 R10K8	756.89	2	752.882	1503.75	38686.5	-0.55024	-0.076543	-0.62678	752.883	756.889	63.991	25.327	0.83701	63.991	63.642	64.479	0		0	0	0	9.6538e-10	2	23664	190.37	190.37	1	88.22	21.473	0
VLEALLPLK	9	1	0	Unmodified	_VLEALLPLK_			0	0	P49327	P49327	P49327	FASN	Fatty acid synthase;[Acyl-carrier-protein] S-acetyltransferase;[Acyl-carrier-protein] S-malonyltransferase;3-oxoacyl-[acyl-carrier-protein] synthase;3-oxoacyl-[acyl-carrier-protein] reductase;3-hydroxypalmitoyl-[acyl-carrier-protein] dehydratase;Enoyl-[acyl-carrier-protein] reductase;Oleoyl-[acyl-carrier-protein] hydrolase	>sp|P49327|FAS_HUMAN Fatty acid synthase OS=Homo sapiens GN=FASN PE=1 SV=3	MULTI-MSMS		JACB153_3	MCF7 R10K8	502.33	2	498.329	994.643	49535.5	-0.025681	-0.61247	-0.63815	498.329	502.335	56.333	22.78	0.67761	56.333	56.131	56.809	0		0	0	0	0.0010401	1	20800	98.033	80.521	1	88.323	22.982	0
TIGGGDDSFNTFFSETGAGK	20	1	0	Unmodified	_TIGGGDDSFNTFFSETGAGK_			0	0	Q71U36;Q71U36-2;Q13748;Q6PEY2;Q13748-2;F8VQQ4;F8VS66;F8VRZ4;F8VWV9;F8VX09;F8W0F6;F8VRK0;F8VXZ7;F5H5D3;Q9BQE3;F8VVB9;P68363;CON__ENSEMBL:ENSBTAP00000016242	Q71U36;F5H5D3;P68363	P68363	TUBA1A;TUBA3C;TUBA3E;TUBA1C;TUBA1B	Tubulin alpha-1A chain;Tubulin alpha-3C/D chain;Tubulin alpha-3E chain;Tubulin alpha-1C chain;Tubulin alpha-1B chain	>sp|Q71U36|TBA1A_HUMAN Tubulin alpha-1A chain OS=Homo sapiens GN=TUBA1A PE=1 SV=1;>sp|Q71U36-2|TBA1A_HUMAN Isoform 2 of Tubulin alpha-1A chain OS=Homo sapiens GN=TUBA1A;>sp|Q13748|TBA3C_HUMAN Tubulin alpha-3C/D chain OS=Homo sapiens GN=TUBA3C PE=1 SV=3;>sp	MULTI-MSMS		JACB153_3	MCF7 R10K8	1008.46	2	1004.45	2006.89	35209.4	-0.67524	-0.31885	-0.99408	1004.95	1008.46	59.375	23.795	0.95824	59.375	59.027	59.985	3.8147e-06		0	0	0	1.578e-21	4	22052	229.6	229.6	1	88.353	18.923	0
VNQIGSVTESLQACK	15	1	0	Unmodified	_VNQIGSVTESLQACK_			0	0	P06733;P06733-2	P06733	P06733	ENO1	Alpha-enolase	>sp|P06733|ENOA_HUMAN Alpha-enolase OS=Homo sapiens GN=ENO1 PE=1 SV=2;>sp|P06733-2|ENOA_HUMAN Isoform MBP-1 of Alpha-enolase OS=Homo sapiens GN=ENO1	MULTI-MSMS		JACB153_3	MCF7 R10K8	821.42	2	817.414	1632.81	38341.7	-0.33454	-0.42489	-0.75943	817.415	821.421	37.691	16.566	0.91984	37.691	37.295	38.215	0		0	0	0	9.8468e-13	1	13160	214.65	0	1	88.617	21.021	0
FDGALNVDLTEFQTNLVPYPR	21	0	1	Unmodified	_FDGALNVDLTEFQTNLVPYPR_			0	0	Q71U36;Q71U36-2;Q13748;Q6PEY2;Q13748-2;V9GZ17;F5H5D3;Q9BQE3;F8VVB9;P68366;A8MUB1;C9JDS9;P68363;CON__ENSEMBL:ENSBTAP00000016242	Q71U36;F5H5D3;P68366;P68363	P68363	TUBA1A;TUBA3C;TUBA3E;TUBA1C;TUBA1B;TUBA4A	Tubulin alpha-1A chain;Tubulin alpha-3C/D chain;Tubulin alpha-3E chain;Tubulin alpha-1C chain;Tubulin alpha-4A chain;Tubulin alpha-1B chain	>sp|Q71U36|TBA1A_HUMAN Tubulin alpha-1A chain OS=Homo sapiens GN=TUBA1A PE=1 SV=1;>sp|Q71U36-2|TBA1A_HUMAN Isoform 2 of Tubulin alpha-1A chain OS=Homo sapiens GN=TUBA1A;>sp|Q13748|TBA3C_HUMAN Tubulin alpha-3C/D chain OS=Homo sapiens GN=TUBA3C PE=1 SV=3;>sp	MULTI-MSMS		JACB153_3	MCF7 R10K8	1210.61	2	1205.11	2408.2	32147.8	-0.44099	0.26509	-0.1759	1205.61	1210.61	78.29	30.097	1.1595	78.29	78.021	79.181	0		0	0	0	3.3504e-41	4	28811	309.41	309.41	1	89.046	24.408	0
LDPHLVLDQLR	11	0	1	Unmodified	_LDPHLVLDQLR_			0	0	P35579;P35579-2;P35580-4;P35580-3;F8W6L6;P35580-2;P35580	P35579;P35580-4	P35579	MYH9;MYH10	Myosin-9;Myosin-10	>sp|P35579|MYH9_HUMAN Myosin-9 OS=Homo sapiens GN=MYH9 PE=1 SV=4;>sp|P35579-2|MYH9_HUMAN Isoform 2 of Myosin-9 OS=Homo sapiens GN=MYH9;>sp|P35580-4|MYH10_HUMAN Isoform 4 of Myosin-10 OS=Homo sapiens GN=MYH10;>sp|P35580-3|MYH10_HUMAN Isoform 3 of Myosin-10	MULTI-MSMS		JACB153_3	MCF7 R10K8	443.59	3	440.254	1317.74	52087.9	-0.16908	-0.33919	-0.50827	440.254	443.59	51.007	21.006	0.47529	51.007	50.768	51.243	0		0	0	0	0.0076952	1	18672	77.593	77.593	1	89.12	27.661	0
IYVDDGLISLQVK	13	1	0	Unmodified	_IYVDDGLISLQVK_			0	0	P14618;P14618-3;H3BQ34;P14618-2;H3BTN5	P14618;P14618-2	P14618	PKM2	Pyruvate kinase isozymes M1/M2;Pyruvate kinase	>sp|P14618|KPYM_HUMAN Pyruvate kinase PKM OS=Homo sapiens GN=PKM PE=1 SV=4;>sp|P14618-3|KPYM_HUMAN Isoform 3 of Pyruvate kinase PKM OS=Homo sapiens GN=PKM;>tr|H3BQ34|H3BQ34_HUMAN Pyruvate kinase OS=Homo sapiens GN=PKM PE=1 SV=1;>sp|P14618-2|KPYM_HUMAN Isof	MULTI-MSMS		JACB153_3	MCF7 R10K8	735.92	2	731.911	1461.81	41219	-0.37543	-0.49725	-0.87268	731.911	735.918	59.363	23.785	0.88888	59.363	59.084	59.973	0		0	0	0	3.8971e-05	3	21958	138.42	138.42	1	89.124	18.995	0
NMAEQIIQEIYSQIQSK	17	1	0	Unmodified	_NMAEQIIQEIYSQIQSK_			0	0	P29401-2;P29401;B4E022;E9PFF2	P29401-2	P29401-2	TKT	Transketolase	>sp|P29401-2|TKT_HUMAN Isoform 2 of Transketolase OS=Homo sapiens GN=TKT;>sp|P29401|TKT_HUMAN Transketolase OS=Homo sapiens GN=TKT PE=1 SV=3;>tr|B4E022|B4E022_HUMAN Transketolase OS=Homo sapiens GN=TKT PE=1 SV=1;>tr|E9PFF2|E9PFF2_HUMAN Transketolase OS=Hom	MULTI-MSMS		JACB153_3	MCF7 R10K8	677.68	3	675.01	2022.01	42358.1	-0.04636	-0.21431	-0.26067	675.345	677.682	91.354	34.454	1.0814	91.354	90.885	91.966	0		0	0	0	2.4474e-18	3	33434	230.97	230.97	1	89.749	27.997	0
VVLIGDSGVGK	11	1	0	Unmodified	_VVLIGDSGVGK_			0	0	Q15907;B4DMK0;P62491;H3BSC1;H3BMH2;J3KQP6;P62491-2;B4DQU5	Q15907	Q15907	RAB11B;RAB11A	Ras-related protein Rab-11B;Ras-related protein Rab-11A	>sp|Q15907|RB11B_HUMAN Ras-related protein Rab-11B OS=Homo sapiens GN=RAB11B PE=1 SV=4;>tr|B4DMK0|B4DMK0_HUMAN Ras-related protein Rab-11B OS=Homo sapiens GN=RAB11B PE=2 SV=1;>sp|P62491|RB11A_HUMAN Ras-related protein Rab-11A OS=Homo sapiens GN=RAB11A PE=1	MULTI-MSMS		JACB153_3	MCF7 R10K8	526.32	2	522.308	1042.6	48091.8	-0.088247	-0.47276	-0.56101	522.307	526.315	34.954	15.656	0.50581	34.954	34.729	35.234	0		0	0	0	0.010715	1	11917	70.488	26.945	1	90.046	24.784	0
DLFEDELVPLFEK	13	1	0	Unmodified	_DLFEDELVPLFEK_			0	0	O60506;O60506-2;O60506-3;O60506-4;O60506-5;F6UXX1	O60506	O60506	SYNCRIP	Heterogeneous nuclear ribonucleoprotein Q	>sp|O60506|HNRPQ_HUMAN Heterogeneous nuclear ribonucleoprotein Q OS=Homo sapiens GN=SYNCRIP PE=1 SV=2;>sp|O60506-2|HNRPQ_HUMAN Isoform 2 of Heterogeneous nuclear ribonucleoprotein Q OS=Homo sapiens GN=SYNCRIP;>sp|O60506-3|HNRPQ_HUMAN Isoform 3 of Heterogen	MULTI-MSMS		JACB153_3	MCF7 R10K8	801.41	2	797.406	1592.8	39477.4	-0.33124	-0.022542	-0.35378	797.407	801.413	85.487	32.496	0.72984	85.487	85.188	85.918	7.6294e-06		0	0	0	2.4079e-05	2	31437	145.71	145.71	1	90.479	28.233	0
STTTGHLIYK	10	1	0	Unmodified	_STTTGHLIYK_			0	0	Q05639;P68104;Q5VTE0;Q5JR01;A6PW80	Q05639;P68104	P68104	EEF1A2;EEF1A1;EEF1A1P5	Elongation factor 1-alpha 2;Elongation factor 1-alpha 1;Putative elongation factor 1-alpha-like 3	>sp|Q05639|EF1A2_HUMAN Elongation factor 1-alpha 2 OS=Homo sapiens GN=EEF1A2 PE=1 SV=1;>sp|P68104|EF1A1_HUMAN Elongation factor 1-alpha 1 OS=Homo sapiens GN=EEF1A1 PE=1 SV=1;>sp|Q5VTE0|EF1A3_HUMAN Putative elongation factor 1-alpha-like 3 OS=Homo sapiens G	MULTI-MSMS		JACB153_3	MCF7 R10K8	564.81	2	560.803	1119.59	46041.6	0.1433	-0.33779	-0.19449	560.803	564.81	17.439	9.8158	0.86174	17.439	17.207	18.068	-1.9073e-06		0	0	0	0.00089206	2	4345	120.09	88.082	1	90.618	20.977	0
FYEAFSK	7	1	0	Unmodified	_FYEAFSK_			0	0	P08238	P08238	P08238	HSP90AB1	Heat shock protein HSP 90-beta	>sp|P08238|HS90B_HUMAN Heat shock protein HSP 90-beta OS=Homo sapiens GN=HSP90AB1 PE=1 SV=4	MULTI-MSMS		JACB153_3	MCF7 R10K8	450.22	2	446.216	890.417	52211.5	-0.33233	-0.51944	-0.85177	446.216	450.223	31.256	14.419	0.87411	31.256	31.014	31.888	1.9073e-06		0	0	0	0.018786	2	10185	65.252	65.252	1	90.945	21.637	0
TLTLVDTGIGMTK	13	1	0	Unmodified	_TLTLVDTGIGMTK_			0	0	P08238;Q58FF8	P08238	P08238	HSP90AB1;HSP90AB2P	Heat shock protein HSP 90-beta;Putative heat shock protein HSP 90-beta 2	>sp|P08238|HS90B_HUMAN Heat shock protein HSP 90-beta OS=Homo sapiens GN=HSP90AB1 PE=1 SV=4;>sp|Q58FF8|H90B2_HUMAN Putative heat shock protein HSP 90-beta 2 OS=Homo sapiens GN=HSP90AB2P PE=1 SV=2	MULTI-MSMS		JACB153_3	MCF7 R10K8	679.38	2	675.371	1348.73	42491.8	-0.027253	-0.059073	-0.086326	675.371	679.378	49.772	20.589	1.0582	49.772	49.474	50.532	0		0	0	0	3.0486e-05	1	18238	142.57	0	1	91.064	21.812	0
QTVAVGVIK	9	1	0	Unmodified	_QTVAVGVIK_			0	0	Q05639;P68104;Q5VTE0	Q05639;P68104	P68104	EEF1A2;EEF1A1;EEF1A1P5	Elongation factor 1-alpha 2;Elongation factor 1-alpha 1;Putative elongation factor 1-alpha-like 3	>sp|Q05639|EF1A2_HUMAN Elongation factor 1-alpha 2 OS=Homo sapiens GN=EEF1A2 PE=1 SV=1;>sp|P68104|EF1A1_HUMAN Elongation factor 1-alpha 1 OS=Homo sapiens GN=EEF1A1 PE=1 SV=1;>sp|Q5VTE0|EF1A3_HUMAN Putative elongation factor 1-alpha-like 3 OS=Homo sapiens G	MULTI-MSMS		JACB153_3	MCF7 R10K8	461.79	2	457.787	913.56	51085.5	-0.1182	-0.73757	-0.85577	457.787	461.794	28.212	13.406	0.47625	28.212	28.041	28.517	1.9073e-06		0	0	0	0.0090133	1	8867	66.435	41.58	1	91.19	19.799	0
EVAGHTEQLQMSR	13	0	1	Unmodified	_EVAGHTEQLQMSR_			0	0	CON__P08727;P08727;K7EMS3	CON__P08727	CON__P08727	KRT19	Keratin, type I cytoskeletal 19	>P08727 SWISS-PROT:P08727 Tax_Id=9606 Gene_Symbol=KRT19 Keratin, type I cytoskeletal 19;>sp|P08727|K1C19_HUMAN Keratin, type I cytoskeletal 19 OS=Homo sapiens GN=KRT19 PE=1 SV=4;>tr|K7EMS3|K7EMS3_HUMAN Keratin, type I cytoskeletal 19 (Fragment) OS=Homo sap	MULTI-MSMS		JACB153_3	MCF7 R10K8	748.36	2	743.359	1484.7	39952.7	-0.64404	0.72633	0.082286	743.36	748.364	19.835	10.611	0.31519	19.835	19.726	20.041	0		0	0	0	1.011e-14	1	5287	222.29	222.29	1	91.249	28.343	0
DVIEEYFK	8	1	0	Unmodified	_DVIEEYFK_			0	0	P25398	P25398	P25398	RPS12	40S ribosomal protein S12	>sp|P25398|RS12_HUMAN 40S ribosomal protein S12 OS=Homo sapiens GN=RPS12 PE=1 SV=3	MULTI-MSMS		JACB153_3	MCF7 R10K8	525.76	2	521.758	1041.5	47851.8	0.20784	0.73197	0.93982	521.758	525.766	53.426	21.805	0.52861	53.426	53.142	53.67	0		0	0	0	0.0060498	1	19637	83.005	83.005	1	91.35	24.833	0
LQLLETVQAR	10	0	1	Unmodified	_LQLLETVQAR_			0	0	REV__P52630;REV__P52630-4;REV__B4DLC8	REV__P52630	REV__P52630			>sp|P52630|STAT2_HUMAN Signal transducer and activator of transcription 2 OS=Homo sapiens GN=STAT2 PE=1 SV=1;>sp|P52630-4|STAT2_HUMAN Isoform 2 of Signal transducer and activator of transcription 2 OS=Homo sapiens GN=STAT2;>tr|B4DLC8|B4DLC8_HUMAN Signal tr	MULTI-MSMS		JACB153_3	MCF7 R10K8	590.85	2	585.846	1169.68	45397.9	-0.7287	-1.2297	-1.9584	585.846	590.85	45.327	19.108	0.43579	45.327	45.122	45.558	0		0	0	0	0.0011065	1	16386	103.88	4.663	1	92.473	25.653	0
EDQTEYLEER	10	0	1	Unmodified	_EDQTEYLEER_			0	0	P07900-2;P07900;Q86U12;G3V2J8;P08238;Q58FF7;Q5T9W8;Q58FF6	P07900-2;P08238;Q58FF6	P07900-2	HSP90AA1;HSP90AB1;HSP90AB3P;HSP90AB4P	Heat shock protein HSP 90-alpha;Heat shock protein HSP 90-beta;Putative heat shock protein HSP 90-beta-3;Putative heat shock protein HSP 90-beta 4	>sp|P07900-2|HS90A_HUMAN Isoform 2 of Heat shock protein HSP 90-alpha OS=Homo sapiens GN=HSP90AA1;>sp|P07900|HS90A_HUMAN Heat shock protein HSP 90-alpha OS=Homo sapiens GN=HSP90AA1 PE=1 SV=5;>tr|Q86U12|Q86U12_HUMAN Full-length cDNA clone CS0CAP007YF18 of T	MULTI-MSMS		JACB153_3	MCF7 R10K8	661.29	2	656.289	1310.56	43085.8	-0.56289	0.27492	-0.28797	656.289	661.293	28.178	13.389	0.80497	28.178	27.957	28.762	0		0	0	0	2.0329e-05	3	8845	158.41	158.41	1	92.529	21.012	0
DYFEQYGK	8	1	0	Unmodified	_DYFEQYGK_			0	0	P09651;P09651-2;F8W6I7;P09651-3;Q32P51;F8VZ49;F8VTQ5;F8VYN5	P09651	P09651	HNRNPA1;HNRNPA1L2	Heterogeneous nuclear ribonucleoprotein A1;Heterogeneous nuclear ribonucleoprotein A1-like 2	>sp|P09651|ROA1_HUMAN Heterogeneous nuclear ribonucleoprotein A1 OS=Homo sapiens GN=HNRNPA1 PE=1 SV=5;>sp|P09651-2|ROA1_HUMAN Isoform A1-A of Heterogeneous nuclear ribonucleoprotein A1 OS=Homo sapiens GN=HNRNPA1;>tr|F8W6I7|F8W6I7_HUMAN Heterogeneous nuclea	MULTI-MSMS		JACB153_3	MCF7 R10K8	529.24	2	525.232	1048.45	48757.9	-0.07844	-0.0017599	-0.0802	525.233	529.239	35.907	15.972	0.69105	35.907	35.616	36.307	0		0	0	0	0.0025092	1	12276	100.15	100.15	1	93.427	23.271	0
GALQNIIPASTGAAK	15	1	0	Unmodified	_GALQNIIPASTGAAK_			0	0	P04406;P04406-2;E7EUT5	P04406	P04406	GAPDH	Glyceraldehyde-3-phosphate dehydrogenase	>sp|P04406|G3P_HUMAN Glyceraldehyde-3-phosphate dehydrogenase OS=Homo sapiens GN=GAPDH PE=1 SV=3;>sp|P04406-2|G3P_HUMAN Isoform 2 of Glyceraldehyde-3-phosphate dehydrogenase OS=Homo sapiens GN=GAPDH;>tr|E7EUT5|E7EUT5_HUMAN Glyceraldehyde-3-phosphate dehydr	MULTI-MSMS		JACB153_3	MCF7 R10K8	706.4	2	706.399	1410.78	41570.1	-1.2748	-0.19736	-1.4722	706.9	710.406	42.012	18.003	0.82734	42.012	41.538	42.366	0		0	0	0	2.3673e-05	3	14965	97.797	97.797	1	93.558	16.929	0
LLCGLLAER	9	0	1	Unmodified	_LLCGLLAER_			0	0	P14174	P14174	P14174	MIF	Macrophage migration inhibitory factor	>sp|P14174|MIF_HUMAN Macrophage migration inhibitory factor OS=Homo sapiens GN=MIF PE=1 SV=4	MULTI-MSMS		JACB153_3	MCF7 R10K8	527.8	2	522.797	1043.58	48100	-0.16417	-0.26291	-0.42707	522.797	527.801	46.855	19.62	1.3216	46.855	46.55	47.871	0		0	0	0	0.00060744	3	16964	126.07	49.01	1	93.57	20.022	0
DSPSVWAAVPGK	12	1	0	Unmodified	_DSPSVWAAVPGK_			0	0	P07737;I3L3D5;CON__P02584	P07737	P07737	PFN1	Profilin-1	>sp|P07737|PROF1_HUMAN Profilin-1 OS=Homo sapiens GN=PFN1 PE=1 SV=2;>tr|I3L3D5|I3L3D5_HUMAN Profilin-1 (Fragment) OS=Homo sapiens GN=PFN1 PE=1 SV=1;>P02584 SWISS-PROT:P02584 (Bos taurus) Profilin-1	MULTI-MSMS		JACB153_3	MCF7 R10K8	611.32	2	607.314	1212.61	44147.4	-0.60276	-0.3794	-0.98216	607.313	611.321	45.254	19.087	0.65078	45.254	45.054	45.705	-3.8147e-06		0	0	0	0.00010593	3	16344	128.88	115.48	1	93.694	18.473	0
LQFHDVAGDIFHQQCK	16	1	0	Unmodified	_LQFHDVAGDIFHQQCK_			0	0	P11413-2;P11413-3;P11413	P11413-2	P11413-2	G6PD	Glucose-6-phosphate 1-dehydrogenase	>sp|P11413-2|G6PD_HUMAN Isoform Long of Glucose-6-phosphate 1-dehydrogenase OS=Homo sapiens GN=G6PD;>sp|P11413-3|G6PD_HUMAN Isoform 3 of Glucose-6-phosphate 1-dehydrogenase OS=Homo sapiens GN=G6PD;>sp|P11413|G6PD_HUMAN Glucose-6-phosphate 1-dehydrogenase O	MULTI-MSMS		JACB153_3	MCF7 R10K8	488.74	4	486.486	1941.92	50055	-1.0659	0.15184	-0.91409	486.738	488.49	42.345	18.117	0.7352	42.345	41.976	42.712	3.8147e-06		0	0	0	2.5413e-05	2	15040	93.754	93.754	1	93.736	22.041	0
DAGVIAGLNVLR	12	0	1	Unmodified	_DAGVIAGLNVLR_			0	0	P08107;P08107-2;E7EP94	P08107	P08107	HSPA1A	Heat shock 70 kDa protein 1A/1B	>sp|P08107|HSP71_HUMAN Heat shock 70 kDa protein 1A/1B OS=Homo sapiens GN=HSPA1A PE=1 SV=5;>sp|P08107-2|HSP71_HUMAN Isoform 2 of Heat shock 70 kDa protein 1A/1B OS=Homo sapiens GN=HSPA1A;>tr|E7EP94|E7EP94_HUMAN Heat shock 70 kDa protein 1A/1B OS=Homo sapie	MULTI-MSMS		JACB153_3	MCF7 R10K8	604.35	2	599.351	1196.69	46646.3	-0.0080475	0.24027	0.23222	599.351	604.355	59.217	23.739	0.78727	59.217	58.97	59.757	3.8147e-06		0	0	0	0.00012544	2	21903	124.42	124.42	1	93.87	24.893	0
AAVEEGIVLGGGCALLR	17	0	1	Unmodified	_AAVEEGIVLGGGCALLR_			0	0	P10809	P10809	P10809	HSPD1	60 kDa heat shock protein, mitochondrial	>sp|P10809|CH60_HUMAN 60 kDa heat shock protein, mitochondrial OS=Homo sapiens GN=HSPD1 PE=1 SV=2	MULTI-MSMS		JACB153_3	MCF7 R10K8	847.96	2	842.956	1683.9	37923.4	-1.0676	0.48817	-0.57941	843.456	847.961	56.741	22.913	1.0373	56.741	56.497	57.535	3.8147e-06		0	0	0	1.3206e-08	2	20947	138.19	108.85	1	93.912	24.557	0
STAGDTHLGGEDFDNR	16	0	1	Unmodified	_STAGDTHLGGEDFDNR_			0	0	P11142;E9PKE3;P11142-2;E9PN89;P54652	P11142;P54652	P11142	HSPA8;HSPA2	Heat shock cognate 71 kDa protein;Heat shock-related 70 kDa protein 2	>sp|P11142|HSP7C_HUMAN Heat shock cognate 71 kDa protein OS=Homo sapiens GN=HSPA8 PE=1 SV=1;>tr|E9PKE3|E9PKE3_HUMAN Heat shock cognate 71 kDa protein OS=Homo sapiens GN=HSPA8 PE=1 SV=1;>sp|P11142-2|HSP7C_HUMAN Isoform 2 of Heat shock cognate 71 kDa protein	MULTI-MSMS		JACB153_3	MCF7 R10K8	567.92	3	564.58	1690.72	46745	-0.25807	0.041441	-0.21662	564.581	567.916	23.915	11.97	0.67956	23.915	23.669	24.348	0		0	0	0	1.6552e-07	2	7096	126.16	120.73	1	93.98	22.681	0
ALLFIPR	7	0	1	Unmodified	_ALLFIPR_			0	0	P08238	P08238	P08238	HSP90AB1	Heat shock protein HSP 90-beta	>sp|P08238|HS90B_HUMAN Heat shock protein HSP 90-beta OS=Homo sapiens GN=HSP90AB1 PE=1 SV=4	MULTI-MSMS		JACB153_3	MCF7 R10K8	415.27	2	415.268	828.522	53678.8	0.40767	-0.60557	-0.1979	415.268	420.272	50.662	20.887	0.98684	50.662	50.421	51.408	0		0	0	0	0.0070914	3	18582	102.98	14.389	1	94.084	21.846	0
QAQEYEALLNIK	12	1	0	Unmodified	_QAQEYEALLNIK_			0	0	P05783;F8VZY9	P05783	P05783	KRT18	Keratin, type I cytoskeletal 18	>sp|P05783|K1C18_HUMAN Keratin, type I cytoskeletal 18 OS=Homo sapiens GN=KRT18 PE=1 SV=2;>tr|F8VZY9|F8VZY9_HUMAN Keratin, type I cytoskeletal 18 OS=Homo sapiens GN=KRT18 PE=1 SV=1	MULTI-MSMS		JACB153_3	MCF7 R10K8	714.39	2	710.378	1418.74	41486.4	0.014569	-0.15778	-0.14322	710.377	714.385	50.559	20.858	0.63509	50.559	50.27	50.905	0		0	0	0	6.9845e-05	3	18466	138.63	138.63	1	94.147	19.17	0
AVFVDLEPTVIDEVR	15	0	1	Unmodified	_AVFVDLEPTVIDEVR_			0	0	Q71U36;Q71U36-2;F8VQQ4;F8VS66;F8VRZ4;F8VWV9;F8VX09;F8VRK0;F5H5D3;Q9BQE3;F8VVB9;P68363;CON__ENSEMBL:ENSBTAP00000016242	Q71U36;F5H5D3;P68363	P68363	TUBA1A;TUBA1C;TUBA1B	Tubulin alpha-1A chain;Tubulin alpha-1C chain;Tubulin alpha-1B chain	>sp|Q71U36|TBA1A_HUMAN Tubulin alpha-1A chain OS=Homo sapiens GN=TUBA1A PE=1 SV=1;>sp|Q71U36-2|TBA1A_HUMAN Isoform 2 of Tubulin alpha-1A chain OS=Homo sapiens GN=TUBA1A;>tr|F8VQQ4|F8VQQ4_HUMAN Tubulin alpha-1A chain (Fragment) OS=Homo sapiens GN=TUBA1A PE=	MULTI-MSMS		JACB153_3	MCF7 R10K8	571.31	3	567.973	1700.9	46657.2	0.0036519	0.43363	0.43728	567.974	571.31	65.556	25.857	0.56088	65.556	65.28	65.841	0		0	0	0	6.2703e-08	2	24259	151.3	151.3	1	94.186	23.906	0
GHYTEGAELVDSVLDVVR	18	0	1	Unmodified	_GHYTEGAELVDSVLDVVR_			0	0	Q13509;Q13509-2;G3V2A3;P07437;Q5JP53;Q5ST81;E9PBJ4;P68371;Q13885;Q9BVA1	Q13509;P07437;P68371;Q13885;Q9BVA1	P68371	TUBB3;TUBB;TUBB4B;TUBB2A;TUBB2B	Tubulin beta-3 chain;Tubulin beta chain;Tubulin beta-4B chain;Tubulin beta-2A chain;Tubulin beta-2B chain	>sp|Q13509|TBB3_HUMAN Tubulin beta-3 chain OS=Homo sapiens GN=TUBB3 PE=1 SV=2;>sp|Q13509-2|TBB3_HUMAN Isoform 2 of Tubulin beta-3 chain OS=Homo sapiens GN=TUBB3;>tr|G3V2A3|G3V2A3_HUMAN Tubulin beta-3 chain (Fragment) OS=Homo sapiens GN=TUBB3 PE=1 SV=1;>sp|	MULTI-MSMS		JACB153_3	MCF7 R10K8	657	3	653.665	1957.97	43054.1	-0.48213	0.23216	-0.24997	653.665	657.002	64.896	25.632	0.97832	64.896	64.577	65.556	0		0	0	0	1.2184e-12	3	23993	156.49	156.49	1	94.371	22.678	0
LTLSALLDGK	10	1	0	Unmodified	_LTLSALLDGK_			0	0	P21796	P21796	P21796	VDAC1	Voltage-dependent anion-selective channel protein 1	>sp|P21796|VDAC1_HUMAN Voltage-dependent anion-selective channel protein 1 OS=Homo sapiens GN=VDAC1 PE=1 SV=2	MULTI-MSMS		JACB153_3	MCF7 R10K8	519.82	2	515.811	1029.61	48831.7	0.010116	-0.085294	-0.075179	515.811	519.818	57.467	23.154	0.6123	57.467	57.197	57.809	0		0	0	0	0.0011673	2	21224	99.283	0	1	94.583	25.61	0
LPEDPLLSGLLDSPALK	17	1	0	Unmodified	_LPEDPLLSGLLDSPALK_			0	0	P49327	P49327	P49327	FASN	Fatty acid synthase;[Acyl-carrier-protein] S-acetyltransferase;[Acyl-carrier-protein] S-malonyltransferase;3-oxoacyl-[acyl-carrier-protein] synthase;3-oxoacyl-[acyl-carrier-protein] reductase;3-hydroxypalmitoyl-[acyl-carrier-protein] dehydratase;Enoyl-[acyl-carrier-protein] reductase;Oleoyl-[acyl-carrier-protein] hydrolase	>sp|P49327|FAS_HUMAN Fatty acid synthase OS=Homo sapiens GN=FASN PE=1 SV=3	MULTI-MSMS		JACB153_3	MCF7 R10K8	893.51	2	889.501	1776.99	37421.6	-0.39019	-0.34543	-0.73562	889.5	893.508	77.439	29.814	0.73258	77.439	77.136	77.869	0		0	0	0	4.2161e-13	2	28616	189.81	189.81	1	94.586	24.903	0
VQPNEAVYTK	10	1	0	Unmodified	_VQPNEAVYTK_			0	0	P11413-2;P11413-3;P11413	P11413-2	P11413-2	G6PD	Glucose-6-phosphate 1-dehydrogenase	>sp|P11413-2|G6PD_HUMAN Isoform Long of Glucose-6-phosphate 1-dehydrogenase OS=Homo sapiens GN=G6PD;>sp|P11413-3|G6PD_HUMAN Isoform 3 of Glucose-6-phosphate 1-dehydrogenase OS=Homo sapiens GN=G6PD;>sp|P11413|G6PD_HUMAN Glucose-6-phosphate 1-dehydrogenase O	MULTI-MSMS		JACB153_3	MCF7 R10K8	578.81	2	574.801	1147.59	45696.8	-0.13373	0.11098	-0.022748	574.801	578.808	20.292	10.763	0.4615	20.292	20.079	20.54	0		0	0	0	0.0050789	2	5442	80.763	68.187	1	94.627	24.793	0
IFGGEIK	7	1	0	Unmodified	_IFGGEIK_			0	0	P07237;H7BZ94;F5H8J2;I3L312;I3L398;I3NI03;I3L4M2	P07237	P07237	P4HB	Protein disulfide-isomerase	>sp|P07237|PDIA1_HUMAN Protein disulfide-isomerase OS=Homo sapiens GN=P4HB PE=1 SV=3;>tr|H7BZ94|H7BZ94_HUMAN Protein disulfide-isomerase OS=Homo sapiens GN=P4HB PE=1 SV=2;>tr|F5H8J2|F5H8J2_HUMAN Uncharacterized protein OS=Homo sapiens GN=P4HB PE=1 SV=1;>tr	MULTI-MSMS		JACB153_3	MCF7 R10K8	386.23	2	382.221	762.428	55340.4	-0.0095375	-0.1345	-0.14404	382.221	386.228	28.43	13.474	0.62821	28.43	28.204	28.833	-1.9073e-06		0	0	0	0.045889	1	8969	53.17	10.047	1	94.675	26.869	0
FSGWYDADLSPAGHEEAK	18	1	0	Unmodified	_FSGWYDADLSPAGHEEAK_			0	0	P18669	P18669	P18669	PGAM1	Phosphoglycerate mutase 1	>sp|P18669|PGAM1_HUMAN Phosphoglycerate mutase 1 OS=Homo sapiens GN=PGAM1 PE=1 SV=2	MULTI-MSMS		JACB153_3	MCF7 R10K8	663.64	3	660.631	1978.87	43096.8	0.10604	-1.2502	-1.1442	660.63	663.301	43.224	18.411	0.38207	43.224	43.013	43.395	0		0	0	0	1.6763e-10	1	15491	127.88	118.78	1	94.763	22.211	0
HIYYITGETK	10	1	0	Unmodified	_HIYYITGETK_			0	0	P07900-2;P07900;Q86U12;Q58FG0	P07900-2	P07900-2	HSP90AA1;HSP90AA5P	Heat shock protein HSP 90-alpha;Putative heat shock protein HSP 90-alpha A5	>sp|P07900-2|HS90A_HUMAN Isoform 2 of Heat shock protein HSP 90-alpha OS=Homo sapiens GN=HSP90AA1;>sp|P07900|HS90A_HUMAN Heat shock protein HSP 90-alpha OS=Homo sapiens GN=HSP90AA1 PE=1 SV=5;>tr|Q86U12|Q86U12_HUMAN Full-length cDNA clone CS0CAP007YF18 of T	MULTI-MSMS		JACB153_3	MCF7 R10K8	616.82	2	612.817	1223.62	44748	-0.40261	-1.0999	-1.5025	612.817	616.823	23.991	11.996	0.84243	23.991	23.763	24.605	0		0	0	0	3.6325e-06	2	6984	182.64	182.64	1	95.055	24.445	0
VAVLGASGGIGQPLSLLLK	19	1	0	Unmodified	_VAVLGASGGIGQPLSLLLK_			0	0	P40926;E9PDB2	P40926	P40926	MDH2	Malate dehydrogenase, mitochondrial	>sp|P40926|MDHM_HUMAN Malate dehydrogenase, mitochondrial OS=Homo sapiens GN=MDH2 PE=1 SV=3;>tr|E9PDB2|E9PDB2_HUMAN Malate dehydrogenase, mitochondrial OS=Homo sapiens GN=MDH2 PE=1 SV=1	MULTI-MSMS		JACB153_3	MCF7 R10K8	901.05	2	897.048	1792.08	37258.3	-0.12939	-0.56715	-0.69654	897.549	901.055	74.22	28.739	0.76942	74.22	73.941	74.71	-7.6294e-06		0	0	0	8.4687e-14	3	27471	182.7	182.7	1	95.415	22.918	0
EIIDLVLDR	9	0	1	Unmodified	_EIIDLVLDR_			0	0	Q71U36;Q71U36-2;F8VQQ4;F8VS66;F8VRZ4;F5H5D3;Q9BQE3;F8VVB9;P68363;CON__ENSEMBL:ENSBTAP00000016242	Q71U36;F5H5D3;P68363	P68363	TUBA1A;TUBA1C;TUBA1B	Tubulin alpha-1A chain;Tubulin alpha-1C chain;Tubulin alpha-1B chain	>sp|Q71U36|TBA1A_HUMAN Tubulin alpha-1A chain OS=Homo sapiens GN=TUBA1A PE=1 SV=1;>sp|Q71U36-2|TBA1A_HUMAN Isoform 2 of Tubulin alpha-1A chain OS=Homo sapiens GN=TUBA1A;>tr|F8VQQ4|F8VQQ4_HUMAN Tubulin alpha-1A chain (Fragment) OS=Homo sapiens GN=TUBA1A PE=	MULTI-MSMS		JACB153_3	MCF7 R10K8	543.31	2	543.314	1084.61	47238.3	0.14798	-0.28168	-0.13369	543.314	548.318	60.912	24.304	0.99948	60.912	60.645	61.644	-3.8147e-06		0	0	0	1.4982e-05	3	22582	164.68	164.68	1	95.491	19.104	0
ALANSLACQGK	11	1	0	Unmodified	_ALANSLACQGK_			0	0	P04075-2;P04075;J3KPS3;H3BR68	P04075-2	P04075-2	ALDOA	Fructose-bisphosphate aldolase A	>sp|P04075-2|ALDOA_HUMAN Isoform 2 of Fructose-bisphosphate aldolase A OS=Homo sapiens GN=ALDOA;>sp|P04075|ALDOA_HUMAN Fructose-bisphosphate aldolase A OS=Homo sapiens GN=ALDOA PE=1 SV=2;>tr|J3KPS3|J3KPS3_HUMAN Fructose-bisphosphate aldolase OS=Homo sapien	MULTI-MSMS		JACB153_3	MCF7 R10K8	570.8	2	566.793	1131.57	46644.8	0.18896	0.45067	0.63963	566.792	570.8	22.191	11.394	0.73663	22.191	21.983	22.72	0		0	0	0	5.9347e-09	1	6234	188.04	188.04	1	95.738	21.888	0
YISPDQLADLYK	12	1	0	Unmodified	_YISPDQLADLYK_			0	0	P06733;P06733-2	P06733	P06733	ENO1	Alpha-enolase	>sp|P06733|ENOA_HUMAN Alpha-enolase OS=Homo sapiens GN=ENO1 PE=1 SV=2;>sp|P06733-2|ENOA_HUMAN Isoform MBP-1 of Alpha-enolase OS=Homo sapiens GN=ENO1	MULTI-MSMS		JACB153_3	MCF7 R10K8	717.37	2	713.367	1424.72	40898.2	-0.49467	-0.33195	-0.82662	713.366	717.374	56.444	22.81	0.77184	56.444	56.174	56.945	0		0	0	0	3.0474e-05	3	20814	149.26	149.26	1	96.024	19.753	0
HELQANCYEEVK	12	1	0	Unmodified	_HELQANCYEEVK_			0	0	E9PK25;P23528;G3V1A4;E9PP50	E9PK25	E9PK25	CFL1	Cofilin-1	>tr|E9PK25|E9PK25_HUMAN Cofilin-1 OS=Homo sapiens GN=CFL1 PE=1 SV=1;>sp|P23528|COF1_HUMAN Cofilin-1 OS=Homo sapiens GN=CFL1 PE=1 SV=3;>tr|G3V1A4|G3V1A4_HUMAN Cofilin 1 (Non-muscle), isoform CRA_a OS=Homo sapiens GN=CFL1 PE=1 SV=1;>tr|E9PP50|E9PP50_HUMAN Co	MULTI-MSMS		JACB153_3	MCF7 R10K8	509.9	3	507.233	1518.68	48367	0.033836	-0.19033	-0.15649	507.233	509.905	20.908	10.969	0.53294	20.908	20.642	21.174	0		0	0	0	6.4234e-05	1	5675	140.14	131.55	1	96.123	28.549	0
AIPQLQGYLR	10	0	1	Unmodified	_AIPQLQGYLR_			0	0	Q02878	Q02878	Q02878	RPL6	60S ribosomal protein L6	>sp|Q02878|RL6_HUMAN 60S ribosomal protein L6 OS=Homo sapiens GN=RPL6 PE=1 SV=3	MULTI-MSMS		JACB153_3	MCF7 R10K8	584.84	2	579.835	1157.66	46088.9	-0.38322	-0.3896	-0.77282	579.836	584.839	47.553	19.851	0.47104	47.553	47.3	47.771	3.8147e-06		0	0	0	0.002592	1	17277	89.247	89.247	1	96.315	26.855	0
LVIITAGAR	9	0	1	Unmodified	_LVIITAGAR_			0	0	P00338-3;P00338;P00338-2;P00338-5;F5GXY2;F5GYU2;F5GXH2;Q6ZMR3	P00338-3	P00338-3	LDHA;LDHAL6A	L-lactate dehydrogenase A chain;L-lactate dehydrogenase A-like 6A	>sp|P00338-3|LDHA_HUMAN Isoform 3 of L-lactate dehydrogenase A chain OS=Homo sapiens GN=LDHA;>sp|P00338|LDHA_HUMAN L-lactate dehydrogenase A chain OS=Homo sapiens GN=LDHA PE=1 SV=2;>sp|P00338-2|LDHA_HUMAN Isoform 2 of L-lactate dehydrogenase A chain OS=Hom	MULTI-MSMS		JACB153_3	MCF7 R10K8	462.3	2	457.295	912.576	51653.8	-0.54142	0.44931	-0.09211	457.296	462.299	34.54	15.515	0.50516	34.54	34.331	34.836	0		0	0	0	0.0037708	1	11667	84.615	18.542	1	96.335	27.908	0
ILGLLDAYLK	10	1	0	Unmodified	_ILGLLDAYLK_			0	0	P26641;B4DTG2	P26641	P26641	EEF1G	Elongation factor 1-gamma	>sp|P26641|EF1G_HUMAN Elongation factor 1-gamma OS=Homo sapiens GN=EEF1G PE=1 SV=3;>tr|B4DTG2|B4DTG2_HUMAN Elongation factor 1-gamma OS=Homo sapiens GN=EEF1G PE=1 SV=1	MULTI-MSMS		JACB153_3	MCF7 R10K8	563.85	2	559.845	1117.67	46709.4	0.29684	-0.074318	0.22252	559.845	563.852	69.41	27.138	1.2367	69.41	69.101	70.337	0		0	0	0	0.0031634	3	25751	87.298	61.255	1	96.74	24.029	0
LTTPTYGDLNHLVSATMSGVTTCLR	25	0	1	Unmodified	_LTTPTYGDLNHLVSATMSGVTTCLR_			0	0	P07437;Q5JP53;Q5ST81;P68371;M0R2D3;Q13885;P04350;Q9BVA1	P07437;P68371;Q13885;P04350;Q9BVA1	P68371	TUBB;TUBB4B;TUBB2A;TUBB4A;TUBB2B	Tubulin beta chain;Tubulin beta-4B chain;Tubulin beta-2A chain;Tubulin beta-4A chain;Tubulin beta-2B chain	>sp|P07437|TBB5_HUMAN Tubulin beta chain OS=Homo sapiens GN=TUBB PE=1 SV=2;>tr|Q5JP53|Q5JP53_HUMAN Tubulin beta chain OS=Homo sapiens GN=TUBB PE=1 SV=1;>tr|Q5ST81|Q5ST81_HUMAN Tubulin beta chain OS=Homo sapiens GN=TUBB PE=1 SV=1;>sp|P68371|TBB4B_HUMAN Tubu	MULTI-MSMS		JACB153_3	MCF7 R10K8	907.12	3	903.451	2707.33	36596.2	-0.42734	-0.57388	-1.0012	903.453	907.121	71.705	27.906	0.83677	71.705	71.317	72.154	0		0	0	0	8.5643e-12	2	26556	142.41	142.41	1	96.96	21.356	0
LSDGVAVLK	9	1	0	Unmodified	_LSDGVAVLK_			0	0	P10809	P10809	P10809	HSPD1	60 kDa heat shock protein, mitochondrial	>sp|P10809|CH60_HUMAN 60 kDa heat shock protein, mitochondrial OS=Homo sapiens GN=HSPD1 PE=1 SV=2	MULTI-MSMS		JACB153_3	MCF7 R10K8	455.28	2	451.271	900.528	51582.7	-0.26318	-0.27993	-0.54311	451.271	455.278	31.096	14.367	0.63043	31.096	30.744	31.375	-1.9073e-06		0	0	0	0.0064585	1	10134	75.294	35.227	1	96.985	24.942	0
FILNLPTFSVR	11	0	1	Unmodified	_FILNLPTFSVR_			0	0	P49721	P49721	P49721	PSMB2	Proteasome subunit beta type-2	>sp|P49721|PSB2_HUMAN Proteasome subunit beta type-2 OS=Homo sapiens GN=PSMB2 PE=1 SV=1	MULTI-MSMS		JACB153_3	MCF7 R10K8	658.88	2	653.88	1305.74	43455.4	-0.20041	0.20166	0.0012489	653.88	658.884	71.216	27.735	0.62608	71.216	70.922	71.548	0		0	0	0	0.00046702	1	26295	124.42	90.547	1	97.724	33.583	0
IISNASCTTNCLAPLAK	17	1	0	Unmodified	_IISNASCTTNCLAPLAK_			0	0	P04406;P04406-2;E7EUT5	P04406	P04406	GAPDH	Glyceraldehyde-3-phosphate dehydrogenase	>sp|P04406|G3P_HUMAN Glyceraldehyde-3-phosphate dehydrogenase OS=Homo sapiens GN=GAPDH PE=1 SV=3;>sp|P04406-2|G3P_HUMAN Isoform 2 of Glyceraldehyde-3-phosphate dehydrogenase OS=Homo sapiens GN=GAPDH;>tr|E7EUT5|E7EUT5_HUMAN Glyceraldehyde-3-phosphate dehydr	MULTI-MSMS		JACB153_3	MCF7 R10K8	921.47	2	917.463	1832.91	36620.1	-1.3858	-0.51065	-1.8965	917.965	921.471	39.183	17.063	0.88153	39.183	38.788	39.669	0		0	0	0	1.5864e-10	2	13766	179.81	158.14	1	97.991	19.25	0
LVPVGYGIK	9	1	0	Unmodified	_LVPVGYGIK_			0	0	P24534	P24534	P24534	EEF1B2	Elongation factor 1-beta	>sp|P24534|EF1B_HUMAN Elongation factor 1-beta OS=Homo sapiens GN=EEF1B2 PE=1 SV=3	MULTI-SECPEP		JACB153_3	MCF7 R10K8	477.92	2	473.292	944.569	49674.4	0.014495	-0.17577	-0.16127	473.292	477.299	36.47	16.153	0.47783	36.47	36.328	36.806	0		0	0	0	0.071573	1	12710	40.882	40.882	1	98.268	25.537	0
FIIPNVVK	8	1	0	Unmodified	_FIIPNVVK_			0	0	P00338-3;P00338;P00338-2;P00338-5;F5GXY2;F5GYU2	P00338-3	P00338-3	LDHA	L-lactate dehydrogenase A chain	>sp|P00338-3|LDHA_HUMAN Isoform 3 of L-lactate dehydrogenase A chain OS=Homo sapiens GN=LDHA;>sp|P00338|LDHA_HUMAN L-lactate dehydrogenase A chain OS=Homo sapiens GN=LDHA PE=1 SV=2;>sp|P00338-2|LDHA_HUMAN Isoform 2 of L-lactate dehydrogenase A chain OS=Hom	MULTI-MSMS		JACB153_3	MCF7 R10K8	469.3	2	465.295	928.575	51263.9	-0.046492	-0.60518	-0.65167	465.295	469.301	49.282	20.428	0.78992	49.282	49.037	49.827	0		0	0	0	0.010767	2	17953	67.981	13.573	1	98.273	22.563	0
ILLANFLAQTEALMR	15	0	1	Unmodified	_ILLANFLAQTEALMR_			0	0	P06744;P06744-2;K7EQ48;CON__Q3ZBD7	P06744;CON__Q3ZBD7	P06744	GPI	Glucose-6-phosphate isomerase	>sp|P06744|G6PI_HUMAN Glucose-6-phosphate isomerase OS=Homo sapiens GN=GPI PE=1 SV=4;>sp|P06744-2|G6PI_HUMAN Isoform 2 of Glucose-6-phosphate isomerase OS=Homo sapiens GN=GPI;>tr|K7EQ48|K7EQ48_HUMAN Glucose-6-phosphate isomerase OS=Homo sapiens GN=GPI PE=1	MULTI-MSMS		JACB153_3	MCF7 R10K8	571.99	3	568.655	1702.94	46508.8	0.39545	-0.32958	0.06587	568.99	571.991	86.024	32.672	0.95233	86.024	85.699	86.651	0		0	0	0	1.2692e-07	2	31632	145	145	1	98.655	38.076	0
LLLQVQHASK	10	1	0	Unmodified	_LLLQVQHASK_			0	0	P05141;P12236;I7HJJ0;P12235;V9GYG0	P05141;P12236;P12235	P12236	SLC25A5;SLC25A6;SLC25A4	ADP/ATP translocase 2;ADP/ATP translocase 3;ADP/ATP translocase 1	>sp|P05141|ADT2_HUMAN ADP/ATP translocase 2 OS=Homo sapiens GN=SLC25A5 PE=1 SV=7;>sp|P12236|ADT3_HUMAN ADP/ATP translocase 3 OS=Homo sapiens GN=SLC25A6 PE=1 SV=4;>tr|I7HJJ0|I7HJJ0_HUMAN ADP/ATP translocase 3 (Fragment) OS=Homo sapiens GN=SLC25A6 PE=1 SV=1;	MULTI-MSMS		JACB153_3	MCF7 R10K8	382.24	3	379.564	1135.67	56300.5	-0.36827	0.014286	-0.35399	379.565	382.236	23.448	11.815	0.35627	23.448	23.302	23.658	0		0	0	0	0.0010115	1	6757	111.06	111.06	1	99.054	24.178	0
SILFVPTSAPR	11	0	1	Unmodified	_SILFVPTSAPR_			0	0	P14625	P14625	P14625	HSP90B1	Endoplasmin	>sp|P14625|ENPL_HUMAN Endoplasmin OS=Homo sapiens GN=HSP90B1 PE=1 SV=1	MULTI-MSMS		JACB153_3	MCF7 R10K8	599.35	2	594.343	1186.67	45594	-0.27696	0.25728	-0.019682	594.342	599.347	49.086	20.359	0.43481	49.086	48.907	49.341	3.8147e-06		0	0	0	0.0027343	1	17910	89.266	89.266	1	99.405	29.784	0
GDGPVQGIINFEQK	14	1	0	Unmodified	_GDGPVQGIINFEQK_			0	0	P00441	P00441	P00441	SOD1	Superoxide dismutase [Cu-Zn]	>sp|P00441|SODC_HUMAN Superoxide dismutase [Cu-Zn] OS=Homo sapiens GN=SOD1 PE=1 SV=2	MULTI-MSMS		JACB153_3	MCF7 R10K8	755.39	2	751.386	1500.76	39836.8	-0.30874	0.74399	0.43525	751.888	755.394	50.4	20.803	0.63055	50.4	50.221	50.852	-3.8147e-06		0	0	0	9.9518e-06	1	18415	137.89	137.89	1	99.601	25.76	0
VPTANVSVVDLTCR	14	0	1	Unmodified	_VPTANVSVVDLTCR_			0	0	P04406;P04406-2;E7EUT5	P04406	P04406	GAPDH	Glyceraldehyde-3-phosphate dehydrogenase	>sp|P04406|G3P_HUMAN Glyceraldehyde-3-phosphate dehydrogenase OS=Homo sapiens GN=GAPDH PE=1 SV=3;>sp|P04406-2|G3P_HUMAN Isoform 2 of Glyceraldehyde-3-phosphate dehydrogenase OS=Homo sapiens GN=GAPDH;>tr|E7EUT5|E7EUT5_HUMAN Glyceraldehyde-3-phosphate dehydr	MULTI-MSMS		JACB153_3	MCF7 R10K8	770.9	2	765.901	1529.79	40004.2	-1.4127	-0.9919	-2.4046	765.902	770.905	45.813	19.272	0.8466	45.813	45.532	46.379	0		0	0	0	2.1987e-15	3	16553	225.85	143.2	1	99.62	18.449	0
VVDLMAHMASK	11	1	0	Unmodified	_VVDLMAHMASK_			0	0	P04406;P04406-2;E7EUT5	P04406	P04406	GAPDH	Glyceraldehyde-3-phosphate dehydrogenase	>sp|P04406|G3P_HUMAN Glyceraldehyde-3-phosphate dehydrogenase OS=Homo sapiens GN=GAPDH PE=1 SV=3;>sp|P04406-2|G3P_HUMAN Isoform 2 of Glyceraldehyde-3-phosphate dehydrogenase OS=Homo sapiens GN=GAPDH;>tr|E7EUT5|E7EUT5_HUMAN Glyceraldehyde-3-phosphate dehydr	MULTI-MSMS		JACB153_3	MCF7 R10K8	403.88	3	401.207	1200.6	55212.4	-0.15258	-0.7467	-0.89928	401.542	403.879	31.829	14.607	1.0933	31.829	31.604	32.697	0		0	0	0	0.062456	1	10438	53.6	53.6	1	99.873	21.602	0
LAPITSDPTEATAVGAVEASFK	22	1	0	Unmodified	_LAPITSDPTEATAVGAVEASFK_			0	0	P14618;P14618-3	P14618	P14618	PKM2	Pyruvate kinase isozymes M1/M2	>sp|P14618|KPYM_HUMAN Pyruvate kinase PKM OS=Homo sapiens GN=PKM PE=1 SV=4;>sp|P14618-3|KPYM_HUMAN Isoform 3 of Pyruvate kinase PKM OS=Homo sapiens GN=PKM	MULTI-MSMS		JACB153_3	MCF7 R10K8	728.72	3	725.711	2174.11	41398.4	-0.097502	-0.38331	-0.48081	726.046	728.716	63.364	25.119	1.2233	63.364	63.021	64.244	0		0	0	0	7.7244e-07	3	23579	102.07	94.111	1	100.26	22.65	0
LALDLEIATYR	11	0	1	Unmodified	_LALDLEIATYR_			0	0	CON__P04264;P04264	CON__P04264	CON__P04264	KRT1	Keratin, type II cytoskeletal 1	>P04264 SWISS-PROT:P04264 Tax_Id=9606 Gene_Symbol=KRT1 Keratin, type II cytoskeletal 1;>sp|P04264|K2C1_HUMAN Keratin, type II cytoskeletal 1 OS=Homo sapiens GN=KRT1 PE=1 SV=6	MULTI-MSMS		JACB153_3	MCF7 R10K8	644.36	2	639.359	1276.7	42968.7	-0.27331	-0.39298	-0.66629	639.358	644.362	58.3	23.432	0.7345	58.3	57.996	58.73	-3.8147e-06		0	0	0	0.00019145	2	21544	143.97	0	1	100.51	26.53	0
GMTLVTPLQLLLFASK	16	1	0	Unmodified	_GMTLVTPLQLLLFASK_			0	0	Q08211;Q08211-2	Q08211	Q08211	DHX9	ATP-dependent RNA helicase A	>sp|Q08211|DHX9_HUMAN ATP-dependent RNA helicase A OS=Homo sapiens GN=DHX9 PE=1 SV=4;>sp|Q08211-2|DHX9_HUMAN Isoform 2 of ATP-dependent RNA helicase A OS=Homo sapiens GN=DHX9	MULTI-MSMS		JACB153_3	MCF7 R10K8	870.51	2	866.508	1731	37882.8	-0.53358	-0.032521	-0.56611	867.008	870.515	95.207	49.152	0.733	95.207	94.886	95.619	0		0	0	0	4.314e-08	1	34744	149.3	149.3	1	100.59	39.097	0
ATAGDTHLGGEDFDNR	16	0	1	Unmodified	_ATAGDTHLGGEDFDNR_			0	0	P17066;P48741;P08107;P08107-2;E7EP94;V9GZ37	P17066;P08107	P08107	HSPA6;HSPA7;HSPA1A	Heat shock 70 kDa protein 6;Putative heat shock 70 kDa protein 7;Heat shock 70 kDa protein 1A/1B	>sp|P17066|HSP76_HUMAN Heat shock 70 kDa protein 6 OS=Homo sapiens GN=HSPA6 PE=1 SV=2;>sp|P48741|HSP77_HUMAN Putative heat shock 70 kDa protein 7 OS=Homo sapiens GN=HSPA7 PE=5 SV=2;>sp|P08107|HSP71_HUMAN Heat shock 70 kDa protein 1A/1B OS=Homo sapiens GN=H	MULTI-MSMS		JACB153_3	MCF7 R10K8	562.58	3	559.248	1674.72	46889.6	-0.029242	-0.21805	-0.2473	559.248	562.584	24.288	12.098	0.63185	24.288	23.994	24.626	0		0	0	0	1.0085e-07	1	7099	138.39	138.39	1	101.6	26.105	0
VFIMDNCEELIPEYLNFIR	19	0	1	Unmodified	_VFIMDNCEELIPEYLNFIR_			0	0	P07900-2;P07900;Q86U12	P07900-2	P07900-2	HSP90AA1	Heat shock protein HSP 90-alpha	>sp|P07900-2|HS90A_HUMAN Isoform 2 of Heat shock protein HSP 90-alpha OS=Homo sapiens GN=HSP90AA1;>sp|P07900|HS90A_HUMAN Heat shock protein HSP 90-alpha OS=Homo sapiens GN=HSP90AA1 PE=1 SV=5;>tr|Q86U12|Q86U12_HUMAN Full-length cDNA clone CS0CAP007YF18 of T	MULTI-MSMS		JACB153_3	MCF7 R10K8	809.4	3	805.729	2414.16	39031.7	-0.28763	-0.24886	-0.53649	806.064	809.399	87.862	33.29	1.0021	87.862	87.473	88.475	0		0	0	0	2.6532e-13	2	32251	171.56	171.56	1	101.66	31.338	0
VFIMDNCEELIPEYLNFIR	19	0	1	Unmodified	_VFIMDNCEELIPEYLNFIR_			0	0	P07900-2;P07900;Q86U12	P07900-2	P07900-2	HSP90AA1	Heat shock protein HSP 90-alpha	>sp|P07900-2|HS90A_HUMAN Isoform 2 of Heat shock protein HSP 90-alpha OS=Homo sapiens GN=HSP90AA1;>sp|P07900|HS90A_HUMAN Heat shock protein HSP 90-alpha OS=Homo sapiens GN=HSP90AA1 PE=1 SV=5;>tr|Q86U12|Q86U12_HUMAN Full-length cDNA clone CS0CAP007YF18 of T	MULTI-MSMS		JACB153_3	MCF7 R10K8	1213.6	2	1208.09	2414.16	31882.5	-0.49888	0.10032	-0.39856	1208.59	1213.6	87.86	33.29	0.90066	87.86	87.492	88.392	0		0	0	0	1.9763e-35	2	32241	294.38	294.38	1	101.69	32.471	0
DQLIYNLLK	9	1	0	Unmodified	_DQLIYNLLK_			0	0	P00338-3;P00338;P00338-4;P00338-2;P00338-5;F5GXY2;F5GYU2;F5GXH2;F5H6W8;F5H5J4;F5GZQ4;F5GWW2;F5GXC7;F5H8H6;F5GXU1	P00338-3	P00338-3	LDHA	L-lactate dehydrogenase A chain	>sp|P00338-3|LDHA_HUMAN Isoform 3 of L-lactate dehydrogenase A chain OS=Homo sapiens GN=LDHA;>sp|P00338|LDHA_HUMAN L-lactate dehydrogenase A chain OS=Homo sapiens GN=LDHA PE=1 SV=2;>sp|P00338-4|LDHA_HUMAN Isoform 4 of L-lactate dehydrogenase A chain OS=Hom	MULTI-MSMS		JACB153_3	MCF7 R10K8	564.33	2	560.324	1118.63	46714.3	0.29751	-0.21671	0.080805	560.324	564.331	61.654	24.552	0.97625	61.654	61.391	62.367	0		0	0	0	0.0065664	2	22824	74.92	65.265	1	101.8	23.924	0
LAPITSDPTEATAVGAVEASFK	22	1	0	Unmodified	_LAPITSDPTEATAVGAVEASFK_			0	0	P14618;P14618-3	P14618	P14618	PKM2	Pyruvate kinase isozymes M1/M2	>sp|P14618|KPYM_HUMAN Pyruvate kinase PKM OS=Homo sapiens GN=PKM PE=1 SV=4;>sp|P14618-3|KPYM_HUMAN Isoform 3 of Pyruvate kinase PKM OS=Homo sapiens GN=PKM	MULTI-MSMS		JACB153_3	MCF7 R10K8	1092.57	2	1088.06	2174.11	34049.5	-0.58761	-0.085507	-0.67312	1088.56	1092.57	63.365	25.119	1.2563	63.365	63.021	64.277	-3.8147e-06		0	0	0	6.5281e-18	3	23556	157.15	157.15	1	102.24	22.135	0
IFGVTTLDIVR	11	0	1	Unmodified	_IFGVTTLDIVR_			0	0	P40926;G3XAL0	P40926	P40926	MDH2	Malate dehydrogenase, mitochondrial;Malate dehydrogenase	>sp|P40926|MDHM_HUMAN Malate dehydrogenase, mitochondrial OS=Homo sapiens GN=MDH2 PE=1 SV=3;>tr|G3XAL0|G3XAL0_HUMAN Malate dehydrogenase OS=Homo sapiens GN=MDH2 PE=1 SV=1	MULTI-MSMS		JACB153_3	MCF7 R10K8	622.37	2	617.364	1232.71	44739.4	0.049755	-0.21243	-0.16268	617.364	622.368	61.449	24.488	0.52151	61.449	61.243	61.764	0		0	0	0	0.00057781	1	22745	113.63	113.63	1	102.3	28.464	0
LISQIVSSITASLR	14	0	1	Unmodified	_LISQIVSSITASLR_			0	0	F5H5D3;Q9BQE3;F8VVB9;Q9H853;P68366;A8MUB1;C9JDS9;P68363;CON__ENSEMBL:ENSBTAP00000016242	F5H5D3;P68366;P68363	P68363	TUBA1C;TUBA1B;TUBA4B;TUBA4A	Tubulin alpha-1C chain;Putative tubulin-like protein alpha-4B;Tubulin alpha-4A chain;Tubulin alpha-1B chain	>tr|F5H5D3|F5H5D3_HUMAN Tubulin alpha-1C chain OS=Homo sapiens GN=TUBA1C PE=1 SV=1;>sp|Q9BQE3|TBA1C_HUMAN Tubulin alpha-1C chain OS=Homo sapiens GN=TUBA1C PE=1 SV=1;>tr|F8VVB9|F8VVB9_HUMAN Tubulin alpha-1B chain (Fragment) OS=Homo sapiens GN=TUBA1B PE=2 SV	MULTI-MSMS		JACB153_3	MCF7 R10K8	749.45	2	744.443	1486.87	40615.2	-0.0082959	-0.08036	-0.088656	744.443	749.447	73.318	28.435	0.8026	73.318	72.987	73.79	0		0	0	0	2.4405e-10	2	27149	190.03	190.03	1	102.3	29.733	0
NIIHGSDSVESAEK	14	1	0	Unmodified	_NIIHGSDSVESAEK_			0	0	P15531-2;P15531	P15531-2	P15531-2	NME1	Nucleoside diphosphate kinase A	>sp|P15531-2|NDKA_HUMAN Isoform 2 of Nucleoside diphosphate kinase A OS=Homo sapiens GN=NME1;>sp|P15531|NDKA_HUMAN Nucleoside diphosphate kinase A OS=Homo sapiens GN=NME1 PE=1 SV=1	MULTI-MSMS		JACB153_3	MCF7 R10K8	498.58	3	495.911	1484.71	49328.1	0.17634	-0.87935	-0.70301	495.911	498.582	19.19	10.397	0.94332	19.19	18.724	19.668	0		0	0	0	6.9616e-05	1	4995	98.439	84.086	1	102.64	25.92	0
VCENIPIVLCGNK	13	1	0	Unmodified	_VCENIPIVLCGNK_			0	0	B5MDF5;P62826;J3KQE5;F5H018;B4DV51	B5MDF5	B5MDF5	RAN	GTP-binding nuclear protein Ran	>tr|B5MDF5|B5MDF5_HUMAN GTP-binding nuclear protein Ran OS=Homo sapiens GN=RAN PE=1 SV=1;>sp|P62826|RAN_HUMAN GTP-binding nuclear protein Ran OS=Homo sapiens GN=RAN PE=1 SV=3;>tr|J3KQE5|J3KQE5_HUMAN GTP-binding nuclear protein Ran (Fragment) OS=Homo sapien	MULTI-MSMS		JACB153_3	MCF7 R10K8	762.39	2	758.387	1514.76	39537.2	-1.3513	-1.4366	-2.7879	758.887	762.393	46.102	19.368	0.45475	46.102	45.924	46.379	0		0	0	0	0.00010552	1	16702	116.71	116.13	1	103.95	24.429	0
MNPEYDYLFK	10	1	0	Acetyl (Protein N-term)	_(ac)MNPEYDYLFK_			1	0	Q9H0U4;E9PLD0	Q9H0U4	Q9H0U4	RAB1B	Ras-related protein Rab-1B	>sp|Q9H0U4|RAB1B_HUMAN Ras-related protein Rab-1B OS=Homo sapiens GN=RAB1B PE=1 SV=1;>tr|E9PLD0|E9PLD0_HUMAN Ras-related protein Rab-1B OS=Homo sapiens GN=RAB1B PE=2 SV=1	MULTI-MSMS		JACB153_3	MCF7 R10K8	685.32	2	681.308	1360.6	42610.1	0.40473	-0.49903	-0.094297	681.308	685.315	73.83	28.612	0.59131	73.83	73.562	74.153	0		0	0	0	0.0029543	1	27224	84.17	84.17	1	105.04	34.627	0
IINEPTAAAIAYGLDK	16	1	0	Unmodified	_IINEPTAAAIAYGLDK_			0	0	P11142;E9PKE3;P11142-2;E9PN89;E9PLF4;E9PI65;P54652;P11021	P11142;P54652;P11021	P11142	HSPA8;HSPA2;HSPA5	Heat shock cognate 71 kDa protein;Heat shock-related 70 kDa protein 2;78 kDa glucose-regulated protein	>sp|P11142|HSP7C_HUMAN Heat shock cognate 71 kDa protein OS=Homo sapiens GN=HSPA8 PE=1 SV=1;>tr|E9PKE3|E9PKE3_HUMAN Heat shock cognate 71 kDa protein OS=Homo sapiens GN=HSPA8 PE=1 SV=1;>sp|P11142-2|HSP7C_HUMAN Isoform 2 of Heat shock cognate 71 kDa protein	MULTI-MSMS		JACB153_3	MCF7 R10K8	834.46	2	830.451	1658.89	38690.2	-0.70447	-0.357	-1.0615	830.952	834.458	53.588	21.862	0.81897	53.588	53.349	54.168	0		0	0	0	2.4016e-06	2	19836	120.29	120.29	1	105.17	22.513	0
YLTVAAVFR	9	0	1	Unmodified	_YLTVAAVFR_			0	0	P07437;Q5JP53;Q5ST81;P68371;P04350	P07437;P68371;P04350	P68371	TUBB;TUBB4B;TUBB4A	Tubulin beta chain;Tubulin beta-4B chain;Tubulin beta-4A chain	>sp|P07437|TBB5_HUMAN Tubulin beta chain OS=Homo sapiens GN=TUBB PE=1 SV=2;>tr|Q5JP53|Q5JP53_HUMAN Tubulin beta chain OS=Homo sapiens GN=TUBB PE=1 SV=1;>tr|Q5ST81|Q5ST81_HUMAN Tubulin beta chain OS=Homo sapiens GN=TUBB PE=1 SV=1;>sp|P68371|TBB4B_HUMAN Tubu	MULTI-MSMS		JACB153_3	MCF7 R10K8	525.3	2	520.3	1038.59	48328.7	0.001344	-0.35329	-0.35195	520.3	525.304	52.056	21.355	1.1908	52.056	51.777	52.968	3.8147e-06		0	0	0	0.00092138	3	19100	105.78	80.966	1	105.99	24.881	0
AHSSMVGVNLPQK	13	1	0	Unmodified	_AHSSMVGVNLPQK_			0	0	P00558;B7Z7A9	P00558	P00558	PGK1	Phosphoglycerate kinase 1;Phosphoglycerate kinase	>sp|P00558|PGK1_HUMAN Phosphoglycerate kinase 1 OS=Homo sapiens GN=PGK1 PE=1 SV=3;>tr|B7Z7A9|B7Z7A9_HUMAN Phosphoglycerate kinase OS=Homo sapiens GN=PGK1 PE=1 SV=1	MULTI-MSMS		JACB153_3	MCF7 R10K8	459.25	3	456.575	1366.7	51315.2	-0.59856	-0.17493	-0.77349	456.575	459.246	25.487	12.494	0.42605	25.487	25.257	25.683	0		0	0	0	1.1269e-05	1	7710	151.98	151.98	1	106.57	27.672	0
DTGIFLDLMHLK	12	1	0	Unmodified	_DTGIFLDLMHLK_			0	0	P12956;B1AHC8;B1AHC9;F5H1I8	P12956	P12956	XRCC6	X-ray repair cross-complementing protein 6	>sp|P12956|XRCC6_HUMAN X-ray repair cross-complementing protein 6 OS=Homo sapiens GN=XRCC6 PE=1 SV=2;>tr|B1AHC8|B1AHC8_HUMAN X-ray repair complementing defective repair in Chinese hamster cells 6 (Ku autoantigen, 70kDa), isoform CRA_b OS=Homo sapiens GN=XR	MULTI-MSMS		JACB153_3	MCF7 R10K8	471.26	3	468.251	1401.73	51044.2	0.072749	0.13911	0.21185	468.252	470.923	69.819	27.268	0.49836	69.819	69.595	70.093	0		0	0	0	0.0092231	1	25800	77.541	77.541	1	107.19	35.021	0
VNLAELFK	8	1	0	Unmodified	_VNLAELFK_			0	0	P30044;P30044-2;P30044-3	P30044	P30044	PRDX5	Peroxiredoxin-5, mitochondrial	>sp|P30044|PRDX5_HUMAN Peroxiredoxin-5, mitochondrial OS=Homo sapiens GN=PRDX5 PE=1 SV=4;>sp|P30044-2|PRDX5_HUMAN Isoform Cytoplasmic+peroxisomal of Peroxiredoxin-5, mitochondrial OS=Homo sapiens GN=PRDX5;>sp|P30044-3|PRDX5_HUMAN Isoform 3 of Peroxiredoxin	MULTI-MSMS		JACB153_3	MCF7 R10K8	471.28	2	467.274	932.533	50217	-0.38688	0.71702	0.33014	467.274	471.281	56.64	22.877	0.5535	56.64	56.392	56.945	0		0	0	0	0.002615	1	20919	95.099	52.99	1	108.01	30.963	0
NMMAACDPR	9	0	1	Unmodified	_NMMAACDPR_			0	0	Q13509;Q13509-2;P07437;Q5JP53;Q5ST81;A6NNZ2;I3L2F9;P68371;Q3ZCM7;Q5SQY0;F5H0I4;Q13885;P04350;Q9BUF5;K7ESM5;Q9BVA1	Q13509;P07437;P68371;Q3ZCM7;Q13885;P04350;Q9BUF5;Q9BVA1	P68371	TUBB3;TUBB;TUBB4B;TUBB8;RP11-631M21.2;TUBB2A;TUBB4A;TUBB6;TUBB2B	Tubulin beta-3 chain;Tubulin beta chain;Tubulin beta-8 chain B;Tubulin beta-4B chain;Tubulin beta-8 chain;Tubulin beta-2A chain;Tubulin beta-4A chain;Tubulin beta-6 chain;Tubulin beta-2B chain	>sp|Q13509|TBB3_HUMAN Tubulin beta-3 chain OS=Homo sapiens GN=TUBB3 PE=1 SV=2;>sp|Q13509-2|TBB3_HUMAN Isoform 2 of Tubulin beta-3 chain OS=Homo sapiens GN=TUBB3;>sp|P07437|TBB5_HUMAN Tubulin beta chain OS=Homo sapiens GN=TUBB PE=1 SV=2;>tr|Q5JP53|Q5JP53_HU	MULTI-MSMS		JACB153_3	MCF7 R10K8	538.22	2	533.217	1064.42	47429.9	-0.063862	-0.8258	-0.88966	533.218	538.222	21.548	11.181	0.54907	21.548	21.354	21.903	0		0	0	0	0.00094798	1	5960	104.05	104.05	1	108.1	26.381	0
FLPLFDR	7	0	1	Unmodified	_FLPLFDR_			0	0	P61604;B8ZZL8;S4R3N1	P61604	P61604	HSPE1	10 kDa heat shock protein, mitochondrial	>sp|P61604|CH10_HUMAN 10 kDa heat shock protein, mitochondrial OS=Homo sapiens GN=HSPE1 PE=1 SV=2;>tr|B8ZZL8|B8ZZL8_HUMAN 10 kDa heat shock protein, mitochondrial OS=Homo sapiens GN=HSPE1 PE=1 SV=1;>tr|S4R3N1|S4R3N1_HUMAN Protein HSPE1-MOB4 OS=Homo sapiens	MULTI-MSMS		JACB153_3	MCF7 R10K8	459.26	2	454.255	906.496	51374.4	0.072166	-0.20945	-0.13728	454.256	459.259	55.683	22.558	0.82768	55.683	55.447	56.275	0		0	0	0	0.007633	2	20538	93.262	48.651	1	111.07	29.799	0
DILADLIPK	9	1	0	Unmodified	_DILADLIPK_			0	0	O75390;B4DJV2;F8W4S1;F8VTT8;F8VWQ5;F8VR34;F8VU34;F8W0J2;F8W031;F8VP03	O75390;F8W031	O75390	CS	Citrate synthase, mitochondrial;Citrate synthase	>sp|O75390|CISY_HUMAN Citrate synthase, mitochondrial OS=Homo sapiens GN=CS PE=1 SV=2;>tr|B4DJV2|B4DJV2_HUMAN Citrate synthase OS=Homo sapiens GN=CS PE=1 SV=1;>tr|F8W4S1|F8W4S1_HUMAN Citrate synthase, mitochondrial (Fragment) OS=Homo sapiens GN=CS PE=1 SV=	MULTI-MSMS		JACB153_3	MCF7 R10K8	503.31	2	499.3	996.586	49228.7	0.31416	0.079722	0.39388	499.3	503.307	70.089	27.36	0.95866	70.089	69.595	70.554	-7.6294e-06		0	0	0	0.0022508	2	25851	89.886	64.264	1	112.47	34.397	0
GYSFTTTAER	10	0	1	Unmodified	_GYSFTTTAER_			0	0	CON__P60712;P60709;P63261;I3L4N8;I3L1U9;I3L3I0	CON__P60712;P63261	CON__P60712	ACTB;ACTG1	Actin, cytoplasmic 1;Actin, cytoplasmic 1, N-terminally processed;Actin, cytoplasmic 2;Actin, cytoplasmic 2, N-terminally processed	>P60712 SWISS-PROT:P60712 (Bos taurus) Actin, cytoplasmic 1;>sp|P60709|ACTB_HUMAN Actin, cytoplasmic 1 OS=Homo sapiens GN=ACTB PE=1 SV=1;>sp|P63261|ACTG_HUMAN Actin, cytoplasmic 2 OS=Homo sapiens GN=ACTG1 PE=1 SV=1;>tr|I3L4N8|I3L4N8_HUMAN Actin, cytoplasmi	MULTI-MSMS		JACB153_3	MCF7 R10K8	571.77	2	566.767	1131.52	46028.7	-0.24847	-0.39242	-0.64089	567.267	571.771	27.902	13.301	1.103	27.902	27.677	28.78	1.9073e-06		0	0	0	0.001233	2	9071	94.309	90.636	1	114.37	21.691	0
YDDMAACMK	9	1	0	Unmodified	_YDDMAACMK_			0	0	P63104;E7EX29;E7ESK7;E7EVZ2;E9PD24;E5RIR4;E5RGE1	P63104	P63104	YWHAZ	14-3-3 protein zeta/delta	>sp|P63104|1433Z_HUMAN 14-3-3 protein zeta/delta OS=Homo sapiens GN=YWHAZ PE=1 SV=1;>tr|E7EX29|E7EX29_HUMAN 14-3-3 protein zeta/delta (Fragment) OS=Homo sapiens GN=YWHAZ PE=1 SV=1;>tr|E7ESK7|E7ESK7_HUMAN 14-3-3 protein zeta/delta (Fragment) OS=Homo sapiens	MULTI-MSMS		JACB153_3	MCF7 R10K8	556.72	2	552.712	1103.41	46126.8	-0.004181	0.27664	0.27246	552.713	556.719	25.961	12.655	0.72081	25.961	25.787	26.508	0		0	0	0	0.0008435	1	7890	110.87	110.87	1	114.79	27.653	0
DVNAAIATIK	10	1	0	Unmodified	_DVNAAIATIK_			0	0	Q71U36;Q71U36-2;Q13748;Q6PEY2;Q13748-2;F5H5D3;Q9BQE3;P68363;CON__ENSEMBL:ENSBTAP00000016242	Q71U36;F5H5D3;P68363	P68363	TUBA1A;TUBA3C;TUBA3E;TUBA1C;TUBA1B	Tubulin alpha-1A chain;Tubulin alpha-3C/D chain;Tubulin alpha-3E chain;Tubulin alpha-1C chain;Tubulin alpha-1B chain	>sp|Q71U36|TBA1A_HUMAN Tubulin alpha-1A chain OS=Homo sapiens GN=TUBA1A PE=1 SV=1;>sp|Q71U36-2|TBA1A_HUMAN Isoform 2 of Tubulin alpha-1A chain OS=Homo sapiens GN=TUBA1A;>sp|Q13748|TBA3C_HUMAN Tubulin alpha-3C/D chain OS=Homo sapiens GN=TUBA3C PE=1 SV=3;>sp	MULTI-MSMS		JACB153_3	MCF7 R10K8	512.3	2	508.293	1014.57	49649.3	-0.23737	-0.32035	-0.55772	508.293	512.3	38.452	16.817	0.92792	38.452	38.229	39.157	0		0	0	0	0.001117	2	13394	103.08	81.688	1	115.24	23.86	0
LSILYPATTGR	11	0	1	Unmodified	_LSILYPATTGR_			0	0	P30041	P30041	P30041	PRDX6	Peroxiredoxin-6	>sp|P30041|PRDX6_HUMAN Peroxiredoxin-6 OS=Homo sapiens GN=PRDX6 PE=1 SV=3	MULTI-MSMS		JACB153_3	MCF7 R10K8	601.34	2	596.34	1190.67	45301.1	-0.25831	-0.028336	-0.28665	596.341	601.345	44.46	18.817	0.63945	44.46	44.216	44.856	0		0	0	0	0.00077733	2	16009	94.191	51.856	1	116.44	31.792	0
VEILANDQGNR	11	0	1	Unmodified	_VEILANDQGNR_			0	0	P17066;P48741	P17066	P17066	HSPA6;HSPA7	Heat shock 70 kDa protein 6;Putative heat shock 70 kDa protein 7	>sp|P17066|HSP76_HUMAN Heat shock 70 kDa protein 6 OS=Homo sapiens GN=HSPA6 PE=1 SV=2;>sp|P48741|HSP77_HUMAN Putative heat shock 70 kDa protein 7 OS=Homo sapiens GN=HSPA7 PE=5 SV=2	MULTI-MSMS		JACB153_3	MCF7 R10K8	619.82	2	614.818	1227.62	44409	-0.26907	0.021041	-0.24803	614.819	619.822	24.361	12.12	0.43892	24.361	24.055	24.494	-1.9073e-06		0	0	0	3.1729e-09	1	7162	202.56	0	1	116.94	28.112	0
DLAEDAPWK	9	1	0	Unmodified	_DLAEDAPWK_			0	0	Q14315;Q14315-2;P21333;P21333-2;Q5HY54;F8WE98;O75369;O75369-9;O75369-2;O75369-3;O75369-6;O75369-4;O75369-5;O75369-8	Q14315;P21333;O75369;O75369-8	O75369-8	FLNC;FLNA;FLNB	Filamin-C;Filamin-A;Filamin-B	>sp|Q14315|FLNC_HUMAN Filamin-C OS=Homo sapiens GN=FLNC PE=1 SV=3;>sp|Q14315-2|FLNC_HUMAN Isoform 2 of Filamin-C OS=Homo sapiens GN=FLNC;>sp|P21333|FLNA_HUMAN Filamin-A OS=Homo sapiens GN=FLNA PE=1 SV=4;>sp|P21333-2|FLNA_HUMAN Isoform 2 of Filamin-A OS=Hom	MULTI-MSMS		JACB153_3	MCF7 R10K8	526.76	2	522.753	1043.49	48468.3	0.46505	0.61606	1.0811	522.755	526.761	43.923	18.637	0.65706	43.923	43.656	44.313	0		0	0	0	0.006836	1	15745	73.985	73.985	1	117.26	32.163	0
EDMAALEK	8	1	0	Unmodified	_EDMAALEK_			0	0	Q71U36;Q71U36-2;F5H5D3;Q9BQE3;P68366;A8MUB1;P68363	Q71U36;F5H5D3;P68366;P68363	P68363	TUBA1A;TUBA1C;TUBA4A;TUBA1B	Tubulin alpha-1A chain;Tubulin alpha-1C chain;Tubulin alpha-4A chain;Tubulin alpha-1B chain	>sp|Q71U36|TBA1A_HUMAN Tubulin alpha-1A chain OS=Homo sapiens GN=TUBA1A PE=1 SV=1;>sp|Q71U36-2|TBA1A_HUMAN Isoform 2 of Tubulin alpha-1A chain OS=Homo sapiens GN=TUBA1A;>tr|F5H5D3|F5H5D3_HUMAN Tubulin alpha-1C chain OS=Homo sapiens GN=TUBA1C PE=1 SV=1;>sp|	MULTI-MSMS		JACB153_3	MCF7 R10K8	457.72	2	453.715	905.416	51435.2	-0.42504	0.054166	-0.37087	453.716	457.723	24.073	12.027	0.65516	24.073	23.892	24.547	0		0	0	0	0.0092291	1	7041	72.879	40.658	1	117.48	31.116	0
NSSYFVEWIPNNVK	14	1	0	Unmodified	_NSSYFVEWIPNNVK_			0	0	Q13509;Q13509-2;P07437;Q5JP53;Q5ST81;E9PBJ4;P68371;Q13885;P04350;Q9BUF5;K7ESM5;Q9BVA1	Q13509;P07437;P68371;Q13885;P04350;Q9BUF5;Q9BVA1	P68371	TUBB3;TUBB;TUBB4B;TUBB2A;TUBB4A;TUBB6;TUBB2B	Tubulin beta-3 chain;Tubulin beta chain;Tubulin beta-4B chain;Tubulin beta-2A chain;Tubulin beta-4A chain;Tubulin beta-6 chain;Tubulin beta-2B chain	>sp|Q13509|TBB3_HUMAN Tubulin beta-3 chain OS=Homo sapiens GN=TUBB3 PE=1 SV=2;>sp|Q13509-2|TBB3_HUMAN Isoform 2 of Tubulin beta-3 chain OS=Homo sapiens GN=TUBB3;>sp|P07437|TBB5_HUMAN Tubulin beta chain OS=Homo sapiens GN=TUBB PE=1 SV=2;>tr|Q5JP53|Q5JP53_HU	MULTI-MSMS		JACB153_3	MCF7 R10K8	852.93	2	848.92	1695.83	37915.4	-0.73575	0.44686	-0.28889	849.424	852.928	60.412	24.136	0.76687	60.412	59.985	60.752	-3.8147e-06		0	0	0	2.1975e-15	2	22333	225.86	225.86	1	120.16	28.989	0
ISGSILNELIGLVR	14	0	1	Unmodified	_ISGSILNELIGLVR_			0	0	Q86VP6;Q86VP6-2	Q86VP6	Q86VP6	CAND1	Cullin-associated NEDD8-dissociated protein 1	>sp|Q86VP6|CAND1_HUMAN Cullin-associated NEDD8-dissociated protein 1 OS=Homo sapiens GN=CAND1 PE=1 SV=2;>sp|Q86VP6-2|CAND1_HUMAN Isoform 2 of Cullin-associated NEDD8-dissociated protein 1 OS=Homo sapiens GN=CAND1	MULTI-MSMS		JACB153_3	MCF7 R10K8	747.45	2	742.446	1482.88	40941.4	-0.33466	0.1397	-0.19496	742.446	747.45	84.589	32.196	0.64981	84.589	84.249	84.899	0		0	0	0	6.9643e-11	2	31127	210.91	210.91	1	121.97	47.997	0
FPLFGGWK	8	1	0	Unmodified	_FPLFGGWK_			0	0	P04843;B7Z4L4	P04843	P04843	RPN1	Dolichyl-diphosphooligosaccharide--protein glycosyltransferase subunit 1	>sp|P04843|RPN1_HUMAN Dolichyl-diphosphooligosaccharide--protein glycosyltransferase subunit 1 OS=Homo sapiens GN=RPN1 PE=1 SV=1;>tr|B7Z4L4|B7Z4L4_HUMAN Dolichyl-diphosphooligosaccharide--protein glycosyltransferase subunit 1 OS=Homo sapiens GN=RPN1 PE=1 S	MULTI-MSMS		JACB153_3	MCF7 R10K8	480.27	2	476.258	950.501	50525.7	-0.068694	0.57168	0.50298	476.258	480.265	60.299	24.103	0.55317	60.299	60.008	60.561	0		0	0	0	0.0071603	2	22424	79.469	58.914	1	129.06	40.008	0
IPAFLNVVDIAGLVK	15	1	0	Unmodified	_IPAFLNVVDIAGLVK_			0	0	J3KQ32;Q9NTK5;Q9NTK5-3;C9JTK6	J3KQ32	J3KQ32	OLA1	Obg-like ATPase 1	>tr|J3KQ32|J3KQ32_HUMAN Obg-like ATPase 1 OS=Homo sapiens GN=OLA1 PE=1 SV=1;>sp|Q9NTK5|OLA1_HUMAN Obg-like ATPase 1 OS=Homo sapiens GN=OLA1 PE=1 SV=2;>sp|Q9NTK5-3|OLA1_HUMAN Isoform 3 of Obg-like ATPase 1 OS=Homo sapiens GN=OLA1;>tr|C9JTK6|C9JTK6_HUMAN Obg	MULTI-MSMS		JACB153_3	MCF7 R10K8	788.98	2	784.974	1567.93	39826.6	-0.32998	0.16024	-0.16974	784.975	788.981	83.543	31.849	0.52728	83.543	83.303	83.83	0		0	0	0	1.7507e-07	2	30656	140.27	140.27	1	133.14	52.986	0
VVLIGGKPDR	10	1	1	Unmodified	_VVLIGGKPDR_			0	0	P61978-3;Q5T6W5;Q5T6W2;P61978-2;P61978;Q5T6W1	P61978-3;P61978-2	P61978-2	HNRNPK	Heterogeneous nuclear ribonucleoprotein K	>sp|P61978-3|HNRPK_HUMAN Isoform 3 of Heterogeneous nuclear ribonucleoprotein K OS=Homo sapiens GN=HNRNPK;>tr|Q5T6W5|Q5T6W5_HUMAN Heterogeneous nuclear ribonucleoprotein K OS=Homo sapiens GN=HNRNPK PE=1 SV=1;>tr|Q5T6W2|Q5T6W2_HUMAN Heterogeneous nuclear ri	MULTI-MSMS		JACB153_3	MCF7 R10K8	357.89	3	351.885	1052.63	57228.1	-0.39974	-0.26648	-0.66622	351.885	357.893	21.42	11.138	0.42332	21.42	21.256	21.679	0		0	0	0	0.020196	1	5912	69.672	69.672	1	134.72	169.43	0
TATESFASDPILYRPVAVALDTK	23	1	1	Unmodified	_TATESFASDPILYRPVAVALDTK_			0	0	P14618;P14618-3;H3BQ34;H3BTJ2;H3BUW1;H3BT25;P14618-2;H3BTN5	P14618;P14618-2	P14618	PKM2	Pyruvate kinase isozymes M1/M2;Pyruvate kinase	>sp|P14618|KPYM_HUMAN Pyruvate kinase PKM OS=Homo sapiens GN=PKM PE=1 SV=4;>sp|P14618-3|KPYM_HUMAN Isoform 3 of Pyruvate kinase PKM OS=Homo sapiens GN=PKM;>tr|H3BQ34|H3BQ34_HUMAN Pyruvate kinase OS=Homo sapiens GN=PKM PE=1 SV=1;>tr|H3BTJ2|H3BTJ2_HUMAN Pyru	MULTI-MSMS		JACB153_3	MCF7 R10K8	828.78	3	822.436	2464.28	38247.6	-0.52755	-0.41549	-0.94304	823.106	828.777	59.853	23.952	1.0313	59.853	59.561	60.592	3.8147e-06		0	0	0	3.4428e-12	1	22141	153.56	153.56	1	140	176.07	0
GPAVGIDLGTTYSCVGVFQHGK	22	1	0	Unmodified	_GPAVGIDLGTTYSCVGVFQHGK_			0	0	P11142;E9PKE3;P11142-2;E9PNE6;E9PLF4;E9PQK7;E9PQQ4;E9PPY6;E9PI65;E9PN25;E9PK54	P11142;E9PK54	P11142	HSPA8	Heat shock cognate 71 kDa protein	>sp|P11142|HSP7C_HUMAN Heat shock cognate 71 kDa protein OS=Homo sapiens GN=HSPA8 PE=1 SV=1;>tr|E9PKE3|E9PKE3_HUMAN Heat shock cognate 71 kDa protein OS=Homo sapiens GN=HSPA8 PE=1 SV=1;>sp|P11142-2|HSP7C_HUMAN Isoform 2 of Heat shock cognate 71 kDa protein	MULTI-MSMS		JACB153_3	MCF7 R10K8	758.05	3	755.044	2262.11	40285.4	-0.7789	0.50418	-0.27472	755.378	758.05	52.85	21.613	1.0455	52.85	52.503	53.548	0		0	0	0	6.3533e-18	2	19378	157.97	157.97	1	142.54	36.372	0
LDYILGLK	8	1	0	Unmodified	_LDYILGLK_			0	0	P46781;C9JM19;B5MCT8	P46781	P46781	RPS9	40S ribosomal protein S9	>sp|P46781|RS9_HUMAN 40S ribosomal protein S9 OS=Homo sapiens GN=RPS9 PE=1 SV=3;>tr|C9JM19|C9JM19_HUMAN 40S ribosomal protein S9 OS=Homo sapiens GN=RPS9 PE=1 SV=1;>tr|B5MCT8|B5MCT8_HUMAN 40S ribosomal protein S9 OS=Homo sapiens GN=RPS9 PE=1 SV=1	MULTI-MSMS		JACB153_3	MCF7 R10K8	471.79	2	467.784	933.554	50970.1	-0.32005	-0.1874	-0.50746	467.784	471.791	52.024	21.337	0.7482	52.024	51.671	52.419	-3.8147e-06		0	0	0	0.0034398	1	19111	91.318	37.161	1	149.04	39.145	0
SIRPGLSPYR	10	0	2	Unmodified	_SIRPGLSPYR_			0	0	Q14697;Q14697-2	Q14697;Q14697-2	Q14697-2	GANAB	Neutral alpha-glucosidase AB	>sp|Q14697|GANAB_HUMAN Neutral alpha-glucosidase AB OS=Homo sapiens GN=GANAB PE=1 SV=3;>sp|Q14697-2|GANAB_HUMAN Isoform 2 of Neutral alpha-glucosidase AB OS=Homo sapiens GN=GANAB	MULTI-MSMS		JACB153_3	MCF7 R10K8	389.22	3	382.552	1144.64	54447.7	-0.072565	0.53348	0.46091	382.886	389.225	22.972	11.659	0.54151	22.972	22.801	23.343	1.9073e-06		0	0	0	0.0020438	1	6559	123.8	114.37	1	150.82	192.8	0
NQTAEKEEFEHQQK	14	2	0	Unmodified	_NQTAEKEEFEHQQK_			0	0	P11142;E9PKE3;E9PNE6;A8K7Q2;E9PS65;E9PM13	P11142	P11142	HSPA8	Heat shock cognate 71 kDa protein	>sp|P11142|HSP7C_HUMAN Heat shock cognate 71 kDa protein OS=Homo sapiens GN=HSPA8 PE=1 SV=1;>tr|E9PKE3|E9PKE3_HUMAN Heat shock cognate 71 kDa protein OS=Homo sapiens GN=HSPA8 PE=1 SV=1;>tr|E9PNE6|E9PNE6_HUMAN Heat shock cognate 71 kDa protein OS=Homo sapie	MULTI-MSMS		JACB153_3	MCF7 R10K8	587.95	3	582.608	1744.8	45866.7	0.52895	-0.24324	0.28571	582.942	587.951	14.512	8.8405	0.24952	14.512	14.419	14.668	9.5367e-07		0	0	0	1.6638e-05	1	3297	143.98	143.98	1	163.23	281.18	0
VDVGKDQEFTVK	12	2	0	Unmodified	_VDVGKDQEFTVK_			0	0	P21333;P21333-2;Q5HY54	P21333	P21333	FLNA	Filamin-A	>sp|P21333|FLNA_HUMAN Filamin-A OS=Homo sapiens GN=FLNA PE=1 SV=4;>sp|P21333-2|FLNA_HUMAN Isoform 2 of Filamin-A OS=Homo sapiens GN=FLNA;>tr|Q5HY54|Q5HY54_HUMAN Filamin-A OS=Homo sapiens GN=FLNA PE=1 SV=1	MULTI-MSMS		JACB153_3	MCF7 R10K8	460.92	3	455.573	1363.7	50958.2	-0.31116	1.9593	1.6481	455.91	460.917	25.956	12.655	0.55041	25.956	25.634	26.184	0		0	0	0	0.00045366	1	7891	116.24	112.52	1	169.93	292.73	0
IYHPNIDEK	9	1	0	Unmodified	_IYHPNIDEK_			0	0	P68036-3;P68036;P68036-2	P68036-3	P68036-3	UBE2L3	Ubiquitin-conjugating enzyme E2 L3	>sp|P68036-3|UB2L3_HUMAN Isoform 3 of Ubiquitin-conjugating enzyme E2 L3 OS=Homo sapiens GN=UBE2L3;>sp|P68036|UB2L3_HUMAN Ubiquitin-conjugating enzyme E2 L3 OS=Homo sapiens GN=UBE2L3 PE=1 SV=1;>sp|P68036-2|UB2L3_HUMAN Isoform 2 of Ubiquitin-conjugating enz	MULTI-MSMS		JACB153_3	MCF7 R10K8	379.53	3	376.861	1127.56	56721	-0.06552	-0.82754	-0.89306	376.86	379.532	19.951	10.647	0.57274	19.951	19.749	20.322	0		0	0	0	0.098224	1	5325	44.863	29.491	1	170.3	50.061	0
MFLVNSFLK	9	1	0	Acetyl (Protein N-term)	_(ac)MFLVNSFLK_			1	0	P04632;K7ELJ7;K7EKD8;K7EM73;K7EMQ1;K7ES78	P04632	P04632	CAPNS1	Calpain small subunit 1	>sp|P04632|CPNS1_HUMAN Calpain small subunit 1 OS=Homo sapiens GN=CAPNS1 PE=1 SV=1;>tr|K7ELJ7|K7ELJ7_HUMAN Calpain small subunit 1 OS=Homo sapiens GN=CAPNS1 PE=1 SV=1;>tr|K7EKD8|K7EKD8_HUMAN Calpain small subunit 1 OS=Homo sapiens GN=CAPNS1 PE=1 SV=1;>tr|K	MULTI-MSMS		JACB153_3	MCF7 R10K8	574.82	2	570.81	1139.6	45454.8	0.007085	0.4489	0.45598	571.311	574.817	102.09	93.117	0.33292	102.09	101.99	102.32	0		0	0	0	7.3364e-05	1	36961	152.34	141.58	1	179.64	54.004	0
IIVEKPFGR	9	1	1	Unmodified	_IIVEKPFGR_			0	0	P11413-2;P11413-3;P11413;E7EUI8;E7EM57;E9PD92	P11413-2	P11413-2	G6PD	Glucose-6-phosphate 1-dehydrogenase	>sp|P11413-2|G6PD_HUMAN Isoform Long of Glucose-6-phosphate 1-dehydrogenase OS=Homo sapiens GN=G6PD;>sp|P11413-3|G6PD_HUMAN Isoform 3 of Glucose-6-phosphate 1-dehydrogenase OS=Homo sapiens GN=G6PD;>sp|P11413|G6PD_HUMAN Glucose-6-phosphate 1-dehydrogenase O	MULTI-MSMS		JACB153_3	MCF7 R10K8	359.56	3	353.55	1057.63	57841.4	-0.56043	-0.10941	-0.66984	353.55	359.558	27.829	13.278	0.77713	27.829	27.607	28.384	0		0	0	0	0.013113	1	8689	78.934	22.371	1	395.33	497.21	0
AAAAAAAAAAGAAGGR	16	0	1	Acetyl (Protein N-term)	_(ac)AAAAAAAAAAGAAGGR_			1	0	Q86U42;Q86U42-2	Q86U42	Q86U42	PABPN1	Polyadenylate-binding protein 2	>sp|Q86U42|PABP2_HUMAN Polyadenylate-binding protein 2 OS=Homo sapiens GN=PABPN1 PE=1 SV=3;>sp|Q86U42-2|PABP2_HUMAN Isoform 2 of Polyadenylate-binding protein 2 OS=Homo sapiens GN=PABPN1	ISO-MSMS	1	JACB153_3	MCF7 R10K8	625.83	2	620.823	1239.63	NaN	NaN	-0.89284	NaN	NaN	NaN	51.142	21.051	0.49115	51.142	50.957	51.448	-3.8147e-06		0	0	0	3.728e-13	1	18734	151.7	124.73	1	NaN	NaN	0
AAAAAAAGDSDSWDADAFSVEDPVR	25	0	1	Acetyl (Protein N-term)	_(ac)AAAAAAAGDSDSWDADAFSVEDPVR_			1	0	O75822;O75822-3;O75822-2	O75822	O75822	EIF3J	Eukaryotic translation initiation factor 3 subunit J	>sp|O75822|EIF3J_HUMAN Eukaryotic translation initiation factor 3 subunit J OS=Homo sapiens GN=EIF3J PE=1 SV=2;>sp|O75822-3|EIF3J_HUMAN Isoform 3 of Eukaryotic translation initiation factor 3 subunit J OS=Homo sapiens GN=EIF3J;>sp|O75822-2|EIF3J_HUMAN Isof	ISO-MSMS	1	JACB153_3	MCF7 R10K8	840.04	3	836.37	2506.09	NaN	NaN	0.84956	NaN	NaN	NaN	74.699	28.899	0.43037	74.699	74.458	74.889	7.6294e-06		0	0	0	3.2063e-14	1	27587	120.52	115.88	1	NaN	NaN	0
AAAAAAGAASGLPGPVAQGLK	21	1	0	Acetyl (Protein N-term)	_(ac)AAAAAAGAASGLPGPVAQGLK_			1	0	Q96P70	Q96P70	Q96P70	IPO9	Importin-9	>sp|Q96P70|IPO9_HUMAN Importin-9 OS=Homo sapiens GN=IPO9 PE=1 SV=3	ISO-MSMS	1	JACB153_3	MCF7 R10K8	900	2	895.992	1789.97	NaN	NaN	-0.19426	NaN	NaN	NaN	61.395	24.468	0.31088	61.395	61.222	61.533	0		0	0	0	3.1476e-30	1	22778	180.92	169.44	1	NaN	NaN	0
AAAAAAGAGPEMVR	14	0	1	Acetyl (Protein N-term)	_(ac)AAAAAAGAGPEMVR_			1	0	P28482;P28482-2	P28482	P28482	MAPK1	Mitogen-activated protein kinase 1	>sp|P28482|MK01_HUMAN Mitogen-activated protein kinase 1 OS=Homo sapiens GN=MAPK1 PE=1 SV=3;>sp|P28482-2|MK01_HUMAN Isoform 2 of Mitogen-activated protein kinase 1 OS=Homo sapiens GN=MAPK1	ISO-MSMS	1	JACB153_3	MCF7 R10K8	647.83	2	642.822	1283.63	NaN	NaN	0.25404	NaN	NaN	NaN	43.487	18.495	0.45929	43.487	43.172	43.631	0		0	0	0	1.454e-05	1	15631	111.39	96.827	1	NaN	NaN	0
AAAAAAVGPGAGGAGSAVPGGAGPCATVSVFPGAR	35	0	1	Acetyl (Protein N-term)	_(ac)AAAAAAVGPGAGGAGSAVPGGAGPCATVSVFPGAR_			1	0	Q86X55;Q86X55-1;Q86X55-2;K7EPK1;K7EK20	Q86X55	Q86X55	CARM1	Histone-arginine methyltransferase CARM1	>sp|Q86X55|CARM1_HUMAN Histone-arginine methyltransferase CARM1 OS=Homo sapiens GN=CARM1 PE=1 SV=3;>sp|Q86X55-1|CARM1_HUMAN Isoform 1 of Histone-arginine methyltransferase CARM1 OS=Homo sapiens GN=CARM1;>sp|Q86X55-2|CARM1_HUMAN Isoform 2 of Histone-arginin	ISO-MSMS	1	JACB153_3	MCF7 R10K8	987.83	3	983.826	2948.46	NaN	NaN	0.07928	NaN	NaN	NaN	67.142	26.376	0.32734	67.142	66.987	67.314	0		0	0	0	1.4174e-26	1	24866	128.43	118.71	1	NaN	NaN	0
AAAAAEQQQFYLLLGNLLSPDNVVR	25	0	1	Acetyl (Protein N-term)	_(ac)AAAAAEQQQFYLLLGNLLSPDNVVR_			1	0	O00410-3;O00410;B4E0R6;E7ETV3;E7EV12;E7EQT5;E7EX05;E7EWK4;E7ETV8;E7ESZ1;E7ESA1;C9JQT6;C9J875;C9JZD8;C9JXE0	O00410-3	O00410-3	IPO5	Importin-5	>sp|O00410-3|IPO5_HUMAN Isoform 3 of Importin-5 OS=Homo sapiens GN=IPO5;>sp|O00410|IPO5_HUMAN Importin-5 OS=Homo sapiens GN=IPO5 PE=1 SV=4;>tr|B4E0R6|B4E0R6_HUMAN Importin-5 OS=Homo sapiens GN=IPO5 PE=1 SV=1;>tr|E7ETV3|E7ETV3_HUMAN Importin-5 (Fragment) OS	ISO-MSMS	1	JACB153_3	MCF7 R10K8	919.16	3	915.152	2742.43	NaN	NaN	-0.01707	NaN	NaN	NaN	102.61	96.441	0.29729	102.61	102.53	102.82	0		0	0	0	2.0546e-05	1	37186	60.747	57.591	1	NaN	NaN	0
AAAAAMAEQESAR	13	0	1	Acetyl (Protein N-term)	_(ac)AAAAAMAEQESAR_			1	0	Q7L5D6	Q7L5D6	Q7L5D6	GET4	Golgi to ER traffic protein 4 homolog	>sp|Q7L5D6|GET4_HUMAN Golgi to ER traffic protein 4 homolog OS=Homo sapiens GN=GET4 PE=1 SV=1	ISO-MSMS	1	JACB153_3	MCF7 R10K8	664.81	2	659.806	1317.6	NaN	NaN	-0.51996	NaN	NaN	NaN	43.54	18.512	0.30582	43.54	43.395	43.701	0		0	0	0	1.7603e-06	1	15641	117.86	94.768	1	NaN	NaN	0
AAAAELSLLEK	11	1	0	Acetyl (Protein N-term)	_(ac)AAAAELSLLEK_			1	0	O43324;C9J1V9;D6RBD7;O43324-2	O43324	O43324	EEF1E1	Eukaryotic translation elongation factor 1 epsilon-1	>sp|O43324|MCA3_HUMAN Eukaryotic translation elongation factor 1 epsilon-1 OS=Homo sapiens GN=EEF1E1 PE=1 SV=1;>tr|C9J1V9|C9J1V9_HUMAN HCG2043275 OS=Homo sapiens GN=EEF1E1-BLOC1S5 PE=4 SV=2;>tr|D6RBD7|D6RBD7_HUMAN Eukaryotic translation elongation factor 1	ISO-MSMS	1	JACB153_3	MCF7 R10K8	583.33	2	579.324	1156.63	NaN	NaN	0.23094	NaN	NaN	NaN	69.018	27.004	0.51169	69.018	68.821	69.333	0		0	0	0	3.2452e-06	1	25537	143.79	116.31	1	NaN	NaN	0
AAAAVGAGHGAGGPGAASSSGGAR	24	0	1	Acetyl (Protein N-term)	_(ac)AAAAVGAGHGAGGPGAASSSGGAR_			1	0	Q96K37	Q96K37	Q96K37	SLC35E1	Solute carrier family 35 member E1	>sp|Q96K37|S35E1_HUMAN Solute carrier family 35 member E1 OS=Homo sapiens GN=SLC35E1 PE=1 SV=2	ISO-MSMS	1	JACB153_3	MCF7 R10K8	639.64	3	636.309	1905.9	NaN	NaN	0.49127	NaN	NaN	NaN	23.629	11.877	0.2363	23.629	23.502	23.738	0		0	0	0	3.7365e-34	1	6894	177.47	167.09	1	NaN	NaN	0
AAAAVQGGR	9	0	1	Acetyl (Protein N-term)	_(ac)AAAAVQGGR_			1	0	E9PI68;Q15005;E9PL01	E9PI68	E9PI68	SPCS2	Signal peptidase complex subunit 2	>tr|E9PI68|E9PI68_HUMAN Signal peptidase complex subunit 2 OS=Homo sapiens GN=SPCS2 PE=1 SV=1;>sp|Q15005|SPCS2_HUMAN Signal peptidase complex subunit 2 OS=Homo sapiens GN=SPCS2 PE=1 SV=3;>tr|E9PL01|E9PL01_HUMAN Signal peptidase complex subunit 2 OS=Homo sa	ISO-MSMS	1	JACB153_3	MCF7 R10K8	426.73	2	421.728	841.441	NaN	NaN	0.87659	NaN	NaN	NaN	24.014	12.002	0.26406	24.014	23.907	24.171	0		0	0	0	0.0027187	1	7047	83.005	44.919	1	NaN	NaN	0
AAAAVSESWPELELAER	17	0	1	Acetyl (Protein N-term)	_(ac)AAAAVSESWPELELAER_			1	0	Q8N1G4	Q8N1G4	Q8N1G4	LRRC47	Leucine-rich repeat-containing protein 47	>sp|Q8N1G4|LRC47_HUMAN Leucine-rich repeat-containing protein 47 OS=Homo sapiens GN=LRRC47 PE=1 SV=1	ISO-MSMS	1	JACB153_3	MCF7 R10K8	940.97	2	935.963	1869.91	NaN	NaN	0.46268	NaN	NaN	NaN	78.159	30.055	0.5062	78.159	77.869	78.375	0		0	0	0	2.2803e-19	1	28795	160.47	151.82	1	NaN	NaN	0
AAAAVVVPAEWIK	13	1	0	Acetyl (Protein N-term)	_(ac)AAAAVVVPAEWIK_			1	0	Q8NI27;F2Z2V2	Q8NI27	Q8NI27	THOC2	THO complex subunit 2	>sp|Q8NI27|THOC2_HUMAN THO complex subunit 2 OS=Homo sapiens GN=THOC2 PE=1 SV=2;>tr|F2Z2V2|F2Z2V2_HUMAN THO complex subunit 2 OS=Homo sapiens GN=THOC2 PE=2 SV=1	ISO-MSMS	1	JACB153_3	MCF7 R10K8	687.9	2	683.89	1365.77	NaN	NaN	-0.40439	NaN	NaN	NaN	78.569	30.19	0.39088	78.569	78.402	78.793	-7.6294e-06		0	0	0	0.0023569	1	28941	66.498	55.551	1	NaN	NaN	0
AAADGDDSLYPIAVLIDELR	20	0	1	Acetyl (Protein N-term)	_(ac)AAADGDDSLYPIAVLIDELR_			1	0	P30153;C9J9C1;M0R0K6;M0QXG4	P30153	P30153	PPP2R1A	Serine/threonine-protein phosphatase 2A 65 kDa regulatory subunit A alpha isoform	>sp|P30153|2AAA_HUMAN Serine/threonine-protein phosphatase 2A 65 kDa regulatory subunit A alpha isoform OS=Homo sapiens GN=PPP2R1A PE=1 SV=4;>tr|C9J9C1|C9J9C1_HUMAN Serine/threonine-protein phosphatase 2A 65 kDa regulatory subunit A alpha isoform (Fragment	ISO-MSMS	1	JACB153_3	MCF7 R10K8	1085.55	2	1080.05	2158.08	NaN	NaN	0.29891	NaN	NaN	NaN	102.95	98.773	0.1866	102.95	102.89	103.07	0		0	0	0	1.2156e-50	1	37286	215.57	210.59	1	NaN	NaN	0
AAADGDDSLYPIAVLIDELR	20	0	1	Acetyl (Protein N-term)	_(ac)AAADGDDSLYPIAVLIDELR_			1	0	P30153;C9J9C1;M0R0K6;M0QXG4	P30153	P30153	PPP2R1A	Serine/threonine-protein phosphatase 2A 65 kDa regulatory subunit A alpha isoform	>sp|P30153|2AAA_HUMAN Serine/threonine-protein phosphatase 2A 65 kDa regulatory subunit A alpha isoform OS=Homo sapiens GN=PPP2R1A PE=1 SV=4;>tr|C9J9C1|C9J9C1_HUMAN Serine/threonine-protein phosphatase 2A 65 kDa regulatory subunit A alpha isoform (Fragment	ISO-MSMS	1	JACB153_3	MCF7 R10K8	724.04	3	720.367	2158.08	NaN	NaN	0.25489	NaN	NaN	NaN	102.95	98.562	0.21813	102.95	102.89	103.1	7.6294e-06		0	0	0	3.4285e-05	1	37299	67.43	63.895	1	NaN	NaN	0
AAAEAANCIMEVSCGQAESSEKPNAEDMTSK	31	2	0	Acetyl (Protein N-term)	_(ac)AAAEAANCIMEVSCGQAESSEKPNAEDMTSK_			1	0	Q99873-4	Q99873-4	Q99873-4			>sp|Q99873-4|ANM1_HUMAN Isoform 4 of Protein arginine N-methyltransferase 1 OS=Homo sapiens GN=PRMT1	ISO-MSMS	1	JACB153_3	MCF7 R10K8	1115.82	3	1110.14	3327.4	NaN	NaN	-1.0365	NaN	NaN	NaN	58.567	23.519	0.42158	58.567	58.336	58.758	0		0	0	0	9.2748e-39	1	21731	162.45	160.19	1	NaN	NaN	0
AAAEDVNVTFEDQQK	15	1	0	Unmodified	_AAAEDVNVTFEDQQK_			0	0	E9PQY2;Q9NQP4	E9PQY2	E9PQY2	PFDN4	Prefoldin subunit 4	>tr|E9PQY2|E9PQY2_HUMAN Prefoldin subunit 4 OS=Homo sapiens GN=PFDN4 PE=1 SV=1;>sp|Q9NQP4|PFD4_HUMAN Prefoldin subunit 4 OS=Homo sapiens GN=PFDN4 PE=1 SV=1	ISO-MSMS	1	JACB153_3	MCF7 R10K8	836.9	2	832.892	1663.77	NaN	NaN	-0.39701	NaN	NaN	NaN	33.634	15.212	0.39731	33.634	33.456	33.853	0		0	0	0	2.0321e-37	1	11305	214.47	195.2	1	NaN	NaN	0
AAAEEEPKPK	10	2	0	Acetyl (Protein N-term)	_(ac)AAAEEEPKPK_			1	0	P55263;P55263-3	P55263	P55263	ADK	Adenosine kinase	>sp|P55263|ADK_HUMAN Adenosine kinase OS=Homo sapiens GN=ADK PE=1 SV=2;>sp|P55263-3|ADK_HUMAN Isoform 3 of Adenosine kinase OS=Homo sapiens GN=ADK	ISO-MSMS	1	JACB153_3	MCF7 R10K8	564.3	2	556.285	1110.56	NaN	NaN	0.97964	NaN	NaN	NaN	16.513	9.503	0.18124	16.513	16.421	16.602	0		0	0	0	0.073591	1	4053	51.268	35.386	1	NaN	NaN	0
AAAEVAGQFVIK	12	1	0	Unmodified	_AAAEVAGQFVIK_			0	0	P02786;G3V0E5;F5H6B1;H7C3V5	P02786	P02786	TFRC	Transferrin receptor protein 1;Transferrin receptor protein 1, serum form	>sp|P02786|TFR1_HUMAN Transferrin receptor protein 1 OS=Homo sapiens GN=TFRC PE=1 SV=2;>tr|G3V0E5|G3V0E5_HUMAN Transferrin receptor (P90, CD71), isoform CRA_c OS=Homo sapiens GN=TFRC PE=1 SV=1;>tr|F5H6B1|F5H6B1_HUMAN Transferrin receptor protein 1, serum f	ISO-MSMS	1	JACB153_3	MCF7 R10K8	606.35	2	602.34	1202.67	NaN	NaN	0.44949	NaN	NaN	NaN	40.372	17.454	0.37058	40.372	40.172	40.543	0		0	0	0	0.00021766	1	14255	87.001	55.158	1	NaN	NaN	0
AAAEVNQDYGLDPK	14	1	0	Unmodified	_AAAEVNQDYGLDPK_			0	0	P07954;P07954-2	P07954	P07954	FH	Fumarate hydratase, mitochondrial	>sp|P07954|FUMH_HUMAN Fumarate hydratase, mitochondrial OS=Homo sapiens GN=FH PE=1 SV=3;>sp|P07954-2|FUMH_HUMAN Isoform Cytoplasmic of Fumarate hydratase, mitochondrial OS=Homo sapiens GN=FH	ISO-MSMS	1	JACB153_3	MCF7 R10K8	749.87	2	745.86	1489.7	NaN	NaN	0.33774	NaN	NaN	NaN	30.962	14.323	0.40084	30.962	30.784	31.185	-1.9073e-06		0	0	0	9.7441e-06	1	10135	112.72	112.72	1	NaN	NaN	0
AAAGEFADDPCSSVK	15	1	0	Unmodified	_AAAGEFADDPCSSVK_			0	0	P35221;P35221-2;G3XAM7;F8W845;E5RIB1;E5RJ41;E5RG03;E5RGY6;E5RHV7	P35221	P35221	CTNNA1	Catenin alpha-1	>sp|P35221|CTNA1_HUMAN Catenin alpha-1 OS=Homo sapiens GN=CTNNA1 PE=1 SV=1;>sp|P35221-2|CTNA1_HUMAN Isoform 2 of Catenin alpha-1 OS=Homo sapiens GN=CTNNA1;>tr|G3XAM7|G3XAM7_HUMAN Catenin (Cadherin-associated protein), alpha 1, 102kDa, isoform CRA_a OS=Homo	ISO-MSMS	1	JACB153_3	MCF7 R10K8	766.84	2	762.835	1523.66	NaN	NaN	0.65983	NaN	NaN	NaN	28.706	13.568	0.26146	28.706	28.571	28.833	1.9073e-06		0	0	0	9.9925e-09	1	9126	134.9	132.47	1	NaN	NaN	0
AAAGGGGGGAAAAGR	15	0	1	Acetyl (Protein N-term)	_(ac)AAAGGGGGGAAAAGR_			1	0	Q9UL25	Q9UL25	Q9UL25	RAB21	Ras-related protein Rab-21	>sp|Q9UL25|RAB21_HUMAN Ras-related protein Rab-21 OS=Homo sapiens GN=RAB21 PE=1 SV=3	ISO-MSMS	1	JACB153_3	MCF7 R10K8	562.28	2	557.273	1112.53	NaN	NaN	-0.45771	NaN	NaN	NaN	18.203	10.069	0.25822	18.203	18.087	18.345	0		0	0	0	5.9295e-17	1	4696	167.44	167.44	1	NaN	NaN	0
AAAIGIDLGTTYSCVGVFQHGK	22	1	0	Unmodified	_AAAIGIDLGTTYSCVGVFQHGK_			0	0	P08107;P08107-2;E7EP94;V9GZ37	P08107	P08107	HSPA1A	Heat shock 70 kDa protein 1A/1B	>sp|P08107|HSP71_HUMAN Heat shock 70 kDa protein 1A/1B OS=Homo sapiens GN=HSPA1A PE=1 SV=5;>sp|P08107-2|HSP71_HUMAN Isoform 2 of Heat shock 70 kDa protein 1A/1B OS=Homo sapiens GN=HSPA1A;>tr|E7EP94|E7EP94_HUMAN Heat shock 70 kDa protein 1A/1B OS=Homo sapie	ISO-MSMS	1	JACB153_3	MCF7 R10K8	758.72	3	755.716	2264.13	NaN	NaN	0.77238	NaN	NaN	NaN	54.87	22.29	0.52893	54.87	54.675	55.204	3.8147e-06		0	0	0	1.9309e-52	1	20247	214.69	211.1	1	NaN	NaN	0
AAAMDVDTPSGTNSGAGK	18	1	0	Acetyl (Protein N-term)	_(ac)AAAMDVDTPSGTNSGAGK_			1	0	P62877	P62877	P62877	RBX1	E3 ubiquitin-protein ligase RBX1	>sp|P62877|RBX1_HUMAN E3 ubiquitin-protein ligase RBX1 OS=Homo sapiens GN=RBX1 PE=1 SV=1	ISO-MSMS	1	JACB153_3	MCF7 R10K8	850.39	2	846.381	1690.75	NaN	NaN	0.54271	NaN	NaN	NaN	39.462	17.156	0.29479	39.462	39.334	39.629	0		0	0	0	2.6975e-27	1	13877	174.52	167.29	1	NaN	NaN	0
AAAPAPEEEMDECEQALAAEPK	22	1	0	Unmodified	_AAAPAPEEEMDECEQALAAEPK_			0	0	P26641;B4DTG2	P26641	P26641	EEF1G	Elongation factor 1-gamma	>sp|P26641|EF1G_HUMAN Elongation factor 1-gamma OS=Homo sapiens GN=EEF1G PE=1 SV=3;>tr|B4DTG2|B4DTG2_HUMAN Elongation factor 1-gamma OS=Homo sapiens GN=EEF1G PE=1 SV=1	ISO-MSMS	1	JACB153_3	MCF7 R10K8	1183.53	2	1179.02	2356.02	NaN	NaN	0.20041	NaN	NaN	NaN	46.766	19.587	0.23534	46.766	46.613	46.848	0		0	0	0	1.3056e-23	1	17024	157.15	150.27	1	NaN	NaN	0
AAAPAPEEEMDECEQALAAEPK	22	1	0	Unmodified	_AAAPAPEEEMDECEQALAAEPK_			0	0	P26641;B4DTG2	P26641	P26641	EEF1G	Elongation factor 1-gamma	>sp|P26641|EF1G_HUMAN Elongation factor 1-gamma OS=Homo sapiens GN=EEF1G PE=1 SV=3;>tr|B4DTG2|B4DTG2_HUMAN Elongation factor 1-gamma OS=Homo sapiens GN=EEF1G PE=1 SV=1	ISO-MSMS	1	JACB153_3	MCF7 R10K8	789.35	3	786.347	2356.02	NaN	NaN	-0.17977	NaN	NaN	NaN	46.883	19.628	0.60978	46.883	46.488	47.098	0		0	0	0	1.5341e-31	1	17046	174.2	171.99	1	NaN	NaN	0
AAATGPSFWLGNETLK	16	1	0	Acetyl (Protein N-term)	_(ac)AAATGPSFWLGNETLK_			1	0	P12955;P12955-2;P12955-3	P12955	P12955	PEPD	Xaa-Pro dipeptidase	>sp|P12955|PEPD_HUMAN Xaa-Pro dipeptidase OS=Homo sapiens GN=PEPD PE=1 SV=3;>sp|P12955-2|PEPD_HUMAN Isoform 2 of Xaa-Pro dipeptidase OS=Homo sapiens GN=PEPD;>sp|P12955-3|PEPD_HUMAN Isoform 3 of Xaa-Pro dipeptidase OS=Homo sapiens GN=PEPD	ISO-MSMS	1	JACB153_3	MCF7 R10K8	857.44	2	852.933	1703.85	NaN	NaN	0.79464	NaN	NaN	NaN	75.464	29.157	0.36678	75.464	75.292	75.659	0		0	0	0	1.1164e-12	1	27841	142.1	112.12	1	NaN	NaN	0
AAAVPQR	7	0	1	Acetyl (Protein N-term)	_(ac)AAAVPQR_			1	0	Q00688;G3V5F2	Q00688	Q00688	FKBP3	Peptidyl-prolyl cis-trans isomerase FKBP3	>sp|Q00688|FKBP3_HUMAN Peptidyl-prolyl cis-trans isomerase FKBP3 OS=Homo sapiens GN=FKBP3 PE=1 SV=1;>tr|G3V5F2|G3V5F2_HUMAN Peptidyl-prolyl cis-trans isomerase FKBP3 OS=Homo sapiens GN=FKBP3 PE=1 SV=1	ISO-MSMS	1	JACB153_3	MCF7 R10K8	382.72	2	377.714	753.413	NaN	NaN	-0.93349	NaN	NaN	NaN	24.639	12.212	0.23692	24.638	24.51	24.747	-1.9073e-06		0	0	0	0.01227	1	7334	85.849	28.745	1	NaN	NaN	0
AACFAIQK	8	1	0	Unmodified	_AACFAIQK_			0	0	O15269	O15269	O15269	SPTLC1	Serine palmitoyltransferase 1	>sp|O15269|SPTC1_HUMAN Serine palmitoyltransferase 1 OS=Homo sapiens GN=SPTLC1 PE=1 SV=1	ISO-MSMS	1	JACB153_3	MCF7 R10K8	458.74	2	454.737	907.459	NaN	NaN	1.7879	NaN	NaN	NaN	25.133	12.38	0.25253	25.133	24.98	25.232	0		0	0	0	0.011813	1	7545	66.799	36.229	1	NaN	NaN	0
AADEEAFEDNSEEYIR	16	0	1	Unmodified	_AADEEAFEDNSEEYIR_			0	0	P55060;P55060-3;P55060-4;B4DUC5	P55060	P55060	CSE1L	Exportin-2	>sp|P55060|XPO2_HUMAN Exportin-2 OS=Homo sapiens GN=CSE1L PE=1 SV=3;>sp|P55060-3|XPO2_HUMAN Isoform 3 of Exportin-2 OS=Homo sapiens GN=CSE1L;>sp|P55060-4|XPO2_HUMAN Isoform 4 of Exportin-2 OS=Homo sapiens GN=CSE1L;>tr|B4DUC5|B4DUC5_HUMAN Uncharacterized pr	ISO-MSMS	1	JACB153_3	MCF7 R10K8	949.4	2	944.398	1886.78	NaN	NaN	0.83772	NaN	NaN	NaN	42.333	18.109	0.45605	42.333	42.07	42.526	0		0	0	0	2.1475e-22	1	15094	181.26	176.16	1	NaN	NaN	0
AADFQLHTHVNDGTEFGGSIYQK	23	1	0	Unmodified	_AADFQLHTHVNDGTEFGGSIYQK_			0	0	F5H740;Q9Y277-2;Q9Y277	F5H740	F5H740	VDAC3	Voltage-dependent anion-selective channel protein 3	>tr|F5H740|F5H740_HUMAN Voltage-dependent anion-selective channel protein 3 OS=Homo sapiens GN=VDAC3 PE=1 SV=1;>sp|Q9Y277-2|VDAC3_HUMAN Isoform 2 of Voltage-dependent anion-selective channel protein 3 OS=Homo sapiens GN=VDAC3;>sp|Q9Y277|VDAC3_HUMAN Voltage	ISO-MSMS	1	JACB153_3	MCF7 R10K8	637.06	4	634.553	2534.18	NaN	NaN	-0.046764	NaN	NaN	NaN	39.15	17.049	0.29016	39.15	39.003	39.293	0		0	0	0	6.0118e-09	1	13764	84.762	78.952	1	NaN	NaN	0
AAEAADLGLGAAVPVELR	18	0	1	Acetyl (Protein N-term)	_(ac)AAEAADLGLGAAVPVELR_			1	0	Q9Y5Q8-3;Q9Y5Q8;H7BY84;Q9Y5Q8-2;Q5T7U1	Q9Y5Q8-3	Q9Y5Q8-3	GTF3C5	General transcription factor 3C polypeptide 5	>sp|Q9Y5Q8-3|TF3C5_HUMAN Isoform 3 of General transcription factor 3C polypeptide 5 OS=Homo sapiens GN=GTF3C5;>sp|Q9Y5Q8|TF3C5_HUMAN General transcription factor 3C polypeptide 5 OS=Homo sapiens GN=GTF3C5 PE=1 SV=2;>tr|H7BY84|H7BY84_HUMAN General transcrip	ISO-MSMS	1	JACB153_3	MCF7 R10K8	888.48	2	882.978	1763.94	NaN	NaN	0.77487	NaN	NaN	NaN	79.662	30.556	0.31257	79.662	79.524	79.836	0		0	0	0	2.0487e-13	1	29359	142.39	131.34	1	NaN	NaN	0
AAEADGPLKR	10	1	1	Acetyl (Protein N-term)	_(ac)AAEADGPLKR_			1	0	O75352;J3QRD5;J3QW43;B4DT74;J3KT75;I3L295;J3QS48;I3L4E0;I3L1D2;J3KSI4	O75352	O75352	MPDU1	Mannose-P-dolichol utilization defect 1 protein	>sp|O75352|MPU1_HUMAN Mannose-P-dolichol utilization defect 1 protein OS=Homo sapiens GN=MPDU1 PE=1 SV=2;>tr|J3QRD5|J3QRD5_HUMAN Mannose-P-dolichol utilization defect 1 protein (Fragment) OS=Homo sapiens GN=MPDU1 PE=1 SV=2;>tr|J3QW43|J3QW43_HUMAN Mannose-P	ISO-MSMS	1	JACB153_3	MCF7 R10K8	544.3	2	535.285	1068.56	NaN	NaN	1.369	NaN	NaN	NaN	24.078	12.027	0.31284	24.078	23.942	24.255	0		0	0	0	0.0045269	1	7116	73.887	73.887	1	NaN	NaN	0
AAEEAFVNDIDESSPGTEWER	21	0	1	Unmodified	_AAEEAFVNDIDESSPGTEWER_			0	0	P09496;P09496-3;P09496-4;P09496-2;C9J8P9;P09496-5	P09496	P09496	CLTA	Clathrin light chain A	>sp|P09496|CLCA_HUMAN Clathrin light chain A OS=Homo sapiens GN=CLTA PE=1 SV=1;>sp|P09496-3|CLCA_HUMAN Isoform 3 of Clathrin light chain A OS=Homo sapiens GN=CLTA;>sp|P09496-4|CLCA_HUMAN Isoform 4 of Clathrin light chain A OS=Homo sapiens GN=CLTA;>sp|P0949	ISO-MSMS	1	JACB153_3	MCF7 R10K8	1181.52	2	1176.52	2351.02	NaN	NaN	-2.4447	NaN	NaN	NaN	54.766	22.256	0.23693	54.766	54.619	54.856	-3.8147e-06		0	0	0	1.6294e-30	1	20223	184.26	179.4	1	NaN	NaN	0
AAEGGLSSPEFSELCIWLGSQIK	23	1	0	Unmodified	_AAEGGLSSPEFSELCIWLGSQIK_			0	0	Q52LJ0-2;Q52LJ0	Q52LJ0-2	Q52LJ0-2	FAM98B	Protein FAM98B	>sp|Q52LJ0-2|FA98B_HUMAN Isoform 2 of Protein FAM98B OS=Homo sapiens GN=FAM98B;>sp|Q52LJ0|FA98B_HUMAN Protein FAM98B OS=Homo sapiens GN=FAM98B PE=1 SV=1	ISO-MSMS	1	JACB153_3	MCF7 R10K8	830.08	3	827.077	2478.21	NaN	NaN	0.46628	NaN	NaN	NaN	82.747	31.579	0.46635	82.747	82.497	82.964	0		0	0	0	0.0059956	1	30421	38.933	35.2	1	NaN	NaN	0
AAEGVSAADMAK	12	1	0	Unmodified	_AAEGVSAADMAK_			0	0	Q9NW13;Q9NW13-2	Q9NW13	Q9NW13	RBM28	RNA-binding protein 28	>sp|Q9NW13|RBM28_HUMAN RNA-binding protein 28 OS=Homo sapiens GN=RBM28 PE=1 SV=3;>sp|Q9NW13-2|RBM28_HUMAN Isoform 2 of RNA-binding protein 28 OS=Homo sapiens GN=RBM28	ISO-MSMS	1	JACB153_3	MCF7 R10K8	564.78	2	560.769	1119.52	NaN	NaN	0.7111	NaN	NaN	NaN	21.854	11.286	0.36214	21.854	21.679	22.041	0		0	0	0	0.0054948	1	6132	60.628	1.885	1	NaN	NaN	0
AAELIANSLATAGDGLIELR	20	0	1	Unmodified	_AAELIANSLATAGDGLIELR_			0	0	P35232;C9JW96	P35232	P35232	PHB	Prohibitin	>sp|P35232|PHB_HUMAN Prohibitin OS=Homo sapiens GN=PHB PE=1 SV=1;>tr|C9JW96|C9JW96_HUMAN Prohibitin (Fragment) OS=Homo sapiens GN=PHB PE=1 SV=2	ISO-MSMS	1	JACB153_3	MCF7 R10K8	1005.05	2	999.547	1997.08	NaN	NaN	0.25871	NaN	NaN	NaN	70.749	27.583	0.41439	70.749	70.57	70.984	0		0	0	0	1.5491e-39	1	26144	194.92	184.64	1	NaN	NaN	0
AAEMEHLLER	10	0	1	Unmodified	_AAEMEHLLER_			0	0	Q86TM6;Q86TM6-3;Q86TM6-2;E9PK19;E9PMA1;E9PN88;H0YCR6	Q86TM6	Q86TM6	SYVN1	E3 ubiquitin-protein ligase synoviolin	>sp|Q86TM6|SYVN1_HUMAN E3 ubiquitin-protein ligase synoviolin OS=Homo sapiens GN=SYVN1 PE=1 SV=2;>sp|Q86TM6-3|SYVN1_HUMAN Isoform 3 of E3 ubiquitin-protein ligase synoviolin OS=Homo sapiens GN=SYVN1;>sp|Q86TM6-2|SYVN1_HUMAN Isoform 2 of E3 ubiquitin-protei	ISO-MSMS	1	JACB153_3	MCF7 R10K8	403.54	3	400.201	1197.58	NaN	NaN	0.18044	NaN	NaN	NaN	29.478	13.827	0.24195	29.478	29.305	29.547	0		0	0	0	0.005698	1	9491	65.5	52.924	1	NaN	NaN	0
AAEPNKTEIQTLFK	14	2	0	Acetyl (Protein N-term)	_(ac)AAEPNKTEIQTLFK_			1	0	Q8N6H7;G5E9L0;E9PQP3;E9PIY6;E9PN48;E9PK28;E9PJT7;E9PMU9;E9PNY8;E9PM63;E9PMR9;E9PM18	Q8N6H7	Q8N6H7	ARFGAP2	ADP-ribosylation factor GTPase-activating protein 2	>sp|Q8N6H7|ARFG2_HUMAN ADP-ribosylation factor GTPase-activating protein 2 OS=Homo sapiens GN=ARFGAP2 PE=1 SV=1;>tr|G5E9L0|G5E9L0_HUMAN ADP-ribosylation factor GTPase-activating protein 2 OS=Homo sapiens GN=ARFGAP2 PE=1 SV=1;>tr|E9PQP3|E9PQP3_HUMAN ADP-rib	ISO-MSMS	1	JACB153_3	MCF7 R10K8	824.45	2	816.436	1630.86	NaN	NaN	0.51418	NaN	NaN	NaN	50.686	20.896	0.32008	50.686	50.532	50.852	0		0	0	0	7.0305e-06	1	18570	119.96	107.09	1	NaN	NaN	0
AAEPQEQEFGK	11	1	0	Unmodified	_AAEPQEQEFGK_			0	0	Q9C0C2;Q9C0C2-2	Q9C0C2	Q9C0C2	TNKS1BP1	182 kDa tankyrase-1-binding protein	>sp|Q9C0C2|TB182_HUMAN 182 kDa tankyrase-1-binding protein OS=Homo sapiens GN=TNKS1BP1 PE=1 SV=4;>sp|Q9C0C2-2|TB182_HUMAN Isoform 2 of 182 kDa tankyrase-1-binding protein OS=Homo sapiens GN=TNKS1BP1	ISO-MSMS	1	JACB153_3	MCF7 R10K8	621.3	2	617.291	1232.57	NaN	NaN	-0.63128	NaN	NaN	NaN	20.653	10.885	0.34118	20.653	20.488	20.829	0		0	0	0	0.0013943	1	5614	69.721	55.041	1	NaN	NaN	0
AAESLADPTEYENLFPGLK	19	1	0	Unmodified	_AAESLADPTEYENLFPGLK_			0	0	P35606;B4DZI8	P35606	P35606	COPB2	Coatomer subunit beta	>sp|P35606|COPB2_HUMAN Coatomer subunit beta OS=Homo sapiens GN=COPB2 PE=1 SV=2;>tr|B4DZI8|B4DZI8_HUMAN Coatomer protein complex, subunit beta 2 (Beta prime), isoform CRA_b OS=Homo sapiens GN=COPB2 PE=1 SV=1	ISO-MSMS	1	JACB153_3	MCF7 R10K8	692.02	3	689.009	2064.01	NaN	NaN	-1.3282	NaN	NaN	NaN	70.718	27.574	0.34207	70.718	70.554	70.896	0		0	0	0	0.0024394	1	26154	50.392	41.296	1	NaN	NaN	0
AAESVSKPDVSEEAPGPSK	19	2	0	Unmodified	_AAESVSKPDVSEEAPGPSK_			0	0	A8MSH5;Q9BY42;A2A2L5	A8MSH5	A8MSH5	C20orf43	UPF0549 protein C20orf43	>tr|A8MSH5|A8MSH5_HUMAN Protein RTF2 homolog OS=Homo sapiens GN=RTFDC1 PE=1 SV=2;>sp|Q9BY42|RTF2_HUMAN Protein RTF2 homolog OS=Homo sapiens GN=RTFDC1 PE=1 SV=3;>tr|A2A2L5|A2A2L5_HUMAN Protein RTF2 homolog (Fragment) OS=Homo sapiens GN=RTFDC1 PE=1 SV=1	ISO-MSMS	1	JACB153_3	MCF7 R10K8	634.65	3	628.978	1883.91	NaN	NaN	1.1494	NaN	NaN	NaN	21.259	11.09	0.39234	21.259	20.962	21.354	1.9073e-06		0	0	0	2.616e-35	1	5873	197.21	186.62	1	NaN	NaN	0
AAETQTLNFGPEWLR	15	0	1	Acetyl (Protein N-term)	_(ac)AAETQTLNFGPEWLR_			1	0	I1E4Y6;Q6Y7W6-3;Q6Y7W6;Q6Y7W6-5;Q6Y7W6-4;E7ESB6;C9JHW1;C9JRZ2;C9JHT0;C9J0V6;C9JXQ0;C9JPV7;F8WCD5;C9JW88	I1E4Y6	I1E4Y6	GIGYF2	PERQ amino acid-rich with GYF domain-containing protein 2	>tr|I1E4Y6|I1E4Y6_HUMAN PERQ amino acid-rich with GYF domain-containing protein 2 OS=Homo sapiens GN=GIGYF2 PE=1 SV=1;>sp|Q6Y7W6-3|PERQ2_HUMAN Isoform 2 of PERQ amino acid-rich with GYF domain-containing protein 2 OS=Homo sapiens GN=GIGYF2;>sp|Q6Y7W6|PERQ2	ISO-MSMS	1	JACB153_3	MCF7 R10K8	893.45	2	887.942	1773.87	NaN	NaN	0.090179	NaN	NaN	NaN	78.965	30.321	0.36141	78.965	78.763	79.124	7.6294e-06		0	0	0	1.4889e-16	1	29089	157.75	146.06	1	NaN	NaN	0
AAFDDAIAELDTLSEESYK	19	1	0	Unmodified	_AAFDDAIAELDTLSEESYK_			0	0	P62258;P62258-2;K7EM20	P62258	P62258	YWHAE	14-3-3 protein epsilon	>sp|P62258|1433E_HUMAN 14-3-3 protein epsilon OS=Homo sapiens GN=YWHAE PE=1 SV=1;>sp|P62258-2|1433E_HUMAN Isoform SV of 14-3-3 protein epsilon OS=Homo sapiens GN=YWHAE;>tr|K7EM20|K7EM20_HUMAN 14-3-3 protein epsilon (Fragment) OS=Homo sapiens GN=YWHAE PE=1	ISO-MSMS	1	JACB153_3	MCF7 R10K8	699.67	3	696.66	2086.96	NaN	NaN	-0.2011	NaN	NaN	NaN	78.208	30.069	0.76184	78.208	77.82	78.582	0		0	0	0	1.5412e-35	2	28863	191.37	182.87	1	NaN	NaN	0
AAFDDAIAELDTLSEESYK	19	1	0	Unmodified	_AAFDDAIAELDTLSEESYK_			0	0	P62258;P62258-2;K7EM20	P62258	P62258	YWHAE	14-3-3 protein epsilon	>sp|P62258|1433E_HUMAN 14-3-3 protein epsilon OS=Homo sapiens GN=YWHAE PE=1 SV=1;>sp|P62258-2|1433E_HUMAN Isoform SV of 14-3-3 protein epsilon OS=Homo sapiens GN=YWHAE;>tr|K7EM20|K7EM20_HUMAN 14-3-3 protein epsilon (Fragment) OS=Homo sapiens GN=YWHAE PE=1	ISO-MSMS	1	JACB153_3	MCF7 R10K8	1048.49	2	1044.49	2086.96	NaN	NaN	-0.17719	NaN	NaN	NaN	78.206	30.069	0.76057	78.206	77.788	78.549	0		0	0	0	6.7247e-45	2	28869	222.7	213.12	1	NaN	NaN	0
AAFECMYTLLDSCLDR	16	0	1	Unmodified	_AAFECMYTLLDSCLDR_			0	0	Q86VP6;Q86VP6-2	Q86VP6	Q86VP6	CAND1	Cullin-associated NEDD8-dissociated protein 1	>sp|Q86VP6|CAND1_HUMAN Cullin-associated NEDD8-dissociated protein 1 OS=Homo sapiens GN=CAND1 PE=1 SV=2;>sp|Q86VP6-2|CAND1_HUMAN Isoform 2 of Cullin-associated NEDD8-dissociated protein 1 OS=Homo sapiens GN=CAND1	ISO-MSMS	1	JACB153_3	MCF7 R10K8	988.44	2	982.931	1963.85	NaN	NaN	-2.0082	NaN	NaN	NaN	73.289	28.425	0.40923	73.289	73.058	73.467	0		0	0	0	0.002784	1	27045	56.959	50.691	1	NaN	NaN	0
AAFGLSEAGFNTACVTK	17	1	0	Unmodified	_AAFGLSEAGFNTACVTK_			0	0	P31040;E9PBJ5;D6RFM5	P31040	P31040	SDHA	Succinate dehydrogenase [ubiquinone] flavoprotein subunit, mitochondrial	>sp|P31040|SDHA_HUMAN Succinate dehydrogenase [ubiquinone] flavoprotein subunit, mitochondrial OS=Homo sapiens GN=SDHA PE=1 SV=2;>tr|E9PBJ5|E9PBJ5_HUMAN Succinate dehydrogenase [ubiquinone] flavoprotein subunit, mitochondrial OS=Homo sapiens GN=SDHA PE=1 S	ISO-MSMS	1	JACB153_3	MCF7 R10K8	876.43	2	872.422	1742.83	NaN	NaN	-1.4227	NaN	NaN	NaN	50.878	20.955	0.4982	50.878	50.532	51.03	0		0	0	0	1.0886e-27	1	18663	186.43	163.63	1	NaN	NaN	0
AAFQSLLDAQADEAVLDHPDLK	22	1	0	Unmodified	_AAFQSLLDAQADEAVLDHPDLK_			0	0	R4GMX3;Q9UBI1;H0Y6Z9;H0Y4W0;R4GMW6;R4GN54	R4GMX3	R4GMX3	COMMD3	COMM domain-containing protein 3	>tr|R4GMX3|R4GMX3_HUMAN Protein COMMD3-BMI1 OS=Homo sapiens GN=COMMD3-BMI1 PE=4 SV=1;>sp|Q9UBI1|COMD3_HUMAN COMM domain-containing protein 3 OS=Homo sapiens GN=COMMD3 PE=1 SV=1;>tr|H0Y6Z9|H0Y6Z9_HUMAN COMM domain-containing protein 3 (Fragment) OS=Homo sap	ISO-MSMS	1	JACB153_3	MCF7 R10K8	792.74	3	789.732	2366.18	NaN	NaN	-0.43942	NaN	NaN	NaN	61.215	24.403	0.39091	61.215	61	61.391	-3.8147e-06		0	0	0	3.7552e-08	1	22728	77.287	66.297	1	NaN	NaN	0
AAFVLPEFAR	10	0	1	Unmodified	_AAFVLPEFAR_			0	0	P19623;K7EL89	P19623	P19623	SRM	Spermidine synthase	>sp|P19623|SPEE_HUMAN Spermidine synthase OS=Homo sapiens GN=SRM PE=1 SV=1;>tr|K7EL89|K7EL89_HUMAN Spermidine synthase (Fragment) OS=Homo sapiens GN=SRM PE=1 SV=1	ISO-MSMS	1	JACB153_3	MCF7 R10K8	565.82	2	560.811	1119.61	NaN	NaN	-0.32815	NaN	NaN	NaN	57.525	23.173	0.43494	57.525	57.269	57.704	3.8147e-06		0	0	0	0.0039369	1	21268	67.726	23.956	1	NaN	NaN	0
AAGAAEAAVAAVEEVGSAGQFEELLR	26	0	1	Acetyl (Protein N-term)	_(ac)AAGAAEAAVAAVEEVGSAGQFEELLR_			1	0	O76003	O76003	O76003	GLRX3	Glutaredoxin-3	>sp|O76003|GLRX3_HUMAN Glutaredoxin-3 OS=Homo sapiens GN=GLRX3 PE=1 SV=2	ISO-MSMS	1	JACB153_3	MCF7 R10K8	1285.15	2	1279.64	2557.27	NaN	NaN	0.5391	NaN	NaN	NaN	102.34	94.754	0.25697	102.34	102.15	102.41	7.6294e-06		0	0	0	8.7194e-89	1	37068	246.73	199.74	1	NaN	NaN	0
AAGAAEAAVAAVEEVGSAGQFEELLR	26	0	1	Acetyl (Protein N-term)	_(ac)AAGAAEAAVAAVEEVGSAGQFEELLR_			1	0	O76003	O76003	O76003	GLRX3	Glutaredoxin-3	>sp|O76003|GLRX3_HUMAN Glutaredoxin-3 OS=Homo sapiens GN=GLRX3 PE=1 SV=2	ISO-MSMS	1	JACB153_3	MCF7 R10K8	857.1	3	853.429	2557.27	NaN	NaN	0.35408	NaN	NaN	NaN	102.34	94.754	0.26396	102.34	102.26	102.53	7.6294e-06		0	0	0	1.3605e-17	1	37087	106.43	98.895	1	NaN	NaN	0
AAGASDVVLYK	11	1	0	Unmodified	_AAGASDVVLYK_			0	0	Q9NSD9	Q9NSD9	Q9NSD9	FARSB	Phenylalanine--tRNA ligase beta subunit	>sp|Q9NSD9|SYFB_HUMAN Phenylalanine--tRNA ligase beta subunit OS=Homo sapiens GN=FARSB PE=1 SV=3	ISO-MSMS	1	JACB153_3	MCF7 R10K8	551.3	2	547.298	1092.58	NaN	NaN	-0.29138	NaN	NaN	NaN	30.391	14.128	0.33658	30.391	30.227	30.563	-1.9073e-06		0	0	0	0.00036234	1	9874	89.548	56.323	1	NaN	NaN	0
AAGCDFTNVVK	11	1	0	Unmodified	_AAGCDFTNVVK_			0	0	H0YB34;P52758;H0YBX3	H0YB34	H0YB34	HRSP12	Ribonuclease UK114	>tr|H0YB34|H0YB34_HUMAN Ribonuclease UK114 (Fragment) OS=Homo sapiens GN=HRSP12 PE=1 SV=1;>sp|P52758|UK114_HUMAN Ribonuclease UK114 OS=Homo sapiens GN=HRSP12 PE=1 SV=1;>tr|H0YBX3|H0YBX3_HUMAN Ribonuclease UK114 (Fragment) OS=Homo sapiens GN=HRSP12 PE=1 SV=	ISO-MSMS	1	JACB153_3	MCF7 R10K8	595.29	2	591.285	1180.55	NaN	NaN	0.10305	NaN	NaN	NaN	31.994	14.663	0.32565	31.994	31.81	32.136	-1.9073e-06		0	0	0	0.0037327	1	10566	66.262	66.262	1	NaN	NaN	0
AAGEGLLTLR	10	0	1	Unmodified	_AAGEGLLTLR_			0	0	Q8TE68;B4DKV7;Q8TE68-2;Q8TE68-3;K7EN83;K7EKX9	Q8TE68	Q8TE68	EPS8L1	Epidermal growth factor receptor kinase substrate 8-like protein 1	>sp|Q8TE68|ES8L1_HUMAN Epidermal growth factor receptor kinase substrate 8-like protein 1 OS=Homo sapiens GN=EPS8L1 PE=1 SV=3;>tr|B4DKV7|B4DKV7_HUMAN Epidermal growth factor receptor kinase substrate 8-like protein 1 OS=Homo sapiens GN=EPS8L1 PE=1 SV=1;>sp	ISO-MSMS	1	JACB153_3	MCF7 R10K8	505.8	2	500.793	999.571	NaN	NaN	-0.0085308	NaN	NaN	NaN	41.348	17.781	0.24521	41.348	41.22	41.465	0		0	0	0	0.0019284	1	14704	73.781	45.054	1	NaN	NaN	0
AAGGAVCEQPLGLECR	16	0	1	Unmodified	_AAGGAVCEQPLGLECR_			0	0	E9PBJ0;Q9HC84	E9PBJ0	E9PBJ0	MUC5B	Mucin-5B	>tr|E9PBJ0|E9PBJ0_HUMAN Mucin-5B OS=Homo sapiens GN=MUC5B PE=2 SV=1;>sp|Q9HC84|MUC5B_HUMAN Mucin-5B OS=Homo sapiens GN=MUC5B PE=1 SV=3	ISO-MSMS	1	JACB153_3	MCF7 R10K8	849.4	2	844.398	1686.78	NaN	NaN	-0.57436	NaN	NaN	NaN	36.02	16.004	0.21762	36.02	35.92	36.138	0		0	0	0	1.2593e-08	1	12386	130.06	125.51	1	NaN	NaN	0
AAGGFTHDELLK	12	1	0	Unmodified	_AAGGFTHDELLK_			0	0	P56182	P56182	P56182	RRP1	Ribosomal RNA processing protein 1 homolog A	>sp|P56182|RRP1_HUMAN Ribosomal RNA processing protein 1 homolog A OS=Homo sapiens GN=RRP1 PE=1 SV=1	ISO-MSMS	1	JACB153_3	MCF7 R10K8	422.89	3	420.219	1257.64	NaN	NaN	-0.97109	NaN	NaN	NaN	27.874	13.292	0.25352	27.874	27.723	27.977	0		0	0	0	0.050687	1	8744	42.789	27.587	1	NaN	NaN	0
AAGIDEQENWHEGK	14	1	0	Unmodified	_AAGIDEQENWHEGK_			0	0	P28838;P28838-2	P28838	P28838	LAP3	Cytosol aminopeptidase	>sp|P28838|AMPL_HUMAN Cytosol aminopeptidase OS=Homo sapiens GN=LAP3 PE=1 SV=3;>sp|P28838-2|AMPL_HUMAN Isoform 2 of Cytosol aminopeptidase OS=Homo sapiens GN=LAP3	ISO-MSMS	1	JACB153_3	MCF7 R10K8	531.25	3	528.574	1582.7	NaN	NaN	0.54355	NaN	NaN	NaN	22.296	11.433	0.55436	22.296	22.016	22.571	-1.9073e-06		0	0	0	8.1216e-05	1	6303	99.941	97.156	1	NaN	NaN	0
[truncated: 13,702 more rows]
[truncated: 13 more columns]
