# Supplementary material for: Competition-based, quantitative chemical proteomics in breast cancer cells identifies new target profiles for sulforaphane
Source: Chem Commun (Camb). 2017 Apr 25;53(37):5182–5. doi: 10.1039/c6cc08797c (PMC6034444; doi:10.1039/c6cc08797c)
Supplement: Supplementary file 3 [file CC-053-C6CC08797C-s003.xlsx]

## Sheet: R10K8_MDA-MB-231
Table S2: Incorporation check of the R10K8 label in the 'spike-in' SILAC proteome for the MDA-MB-231 cell line
Reported below is the raw data file from the mass spectrometry-based proteomics experiment to check the incorporation of the R10K8 label within the proteome of the 'spike-in' SILAC lysate for the MDA-MB-231 cell line. The incorporation of the R10K8 label was confirmed to be > 98%.
					Average Intensity L	Average Intensity H		Protein lysate (50 μL at a protein concentration of 2 mg/mL) obtained from R10K8 proteome-labelled MDA-MB-231 cells was precipitated with ice-cold MeOH (8 vol.) overnight at -80 ˚C. The protein was pelleted by centrifugation at 17,000 x g for 10 min at 10 ˚C and subsequently washed twice with 10 % MilliQ water (in MeOH). The protein was air-dried for 2 min before being re-suspended in 80 μL 5 mM …
Average H/L	53.4036				627448	3.28937e+07
1-1/(H/L Average)	0.981275			H/L ratio	52.4245
x100	98.1275	% incorporation		1-1/(H/L Average)	0.980925
				x100	98.0925	% incorporation
(H/L Average)/(H/L Average+1)	0.981619
x100	98.1619	% incorporation
Sequence	Length	K Count	R Count	Modifications	Modified sequence	Oxidation (M) Probabilities	Oxidation (M) Score Diffs	Acetyl (Protein N-term)	Oxidation (M)	Proteins	Leading Proteins	Leading Razor Protein	Gene Names	Protein Names	Fasta headers	Type	Labeling State	Raw file	Experiment	MS/MS m/z	Charge	m/z	Mass	Resolution	Uncalibrated - Calibrated m/z [ppm]	Mass Error [ppm]	Uncalibrated Mass Error [ppm]	Max intensity m/z 0	Max intensity m/z 1	Retention time	B mixture	Retention Length	Calibrated Retention Time	Calibrated Retention Time Start	Calibrated Retention Time Finish	Retention Time Calibration	Match Time Difference	PIF	Fraction of total spectrum	Base peak fraction	PEP	MS/MS Count	MS/MS Scan Number	Score	Delta score	Combinatorics	Ratio H/L	Ratio H/L normalized	Ratio H/L shift
GTAYTFFTPGNLK	13	1	0	Unmodified	_GTAYTFFTPGNLK_			0	0	H3BLZ8;Q92841;C9JMU5;Q92841-2;Q92841-3;Q92841-1	H3BLZ8	H3BLZ8	DDX17	Probable ATP-dependent RNA helicase DDX17	>tr|H3BLZ8|H3BLZ8_HUMAN Probable ATP-dependent RNA helicase DDX17 OS=Homo sapiens GN=DDX17 PE=1 SV=1;>sp|Q92841|DDX17_HUMAN Probable ATP-dependent RNA helicase DDX17 OS=Homo sapiens GN=DDX17 PE=1 SV=2;>tr|C9JMU5|C9JMU5_HUMAN Probable ATP-dependent RNA heli	MULTI-MSMS		JACB153_1	MDA-MB-231 R10K8	712.87	2	708.862	1415.71	41241.2	-0.18125	-0.58261	-0.76386	708.861	712.869	52.82	21.608	0.5554	52.82	52.546	53.101	0		0	0	0	0.010304	1	18158	66.619	47.995	1	0.12188	0.0024661	0
AEEALSDLRR	10	0	2	Unmodified	_AEEALSDLRR_			0	0	Q8IZ41	Q8IZ41	Q8IZ41	RASEF	Ras and EF-hand domain-containing protein	>sp|Q8IZ41|RASEF_HUMAN Ras and EF-hand domain-containing protein OS=Homo sapiens GN=RASEF PE=1 SV=1	MULTI-SECPEP		JACB153_1	MDA-MB-231 R10K8	393.23	3	387.207	1158.6	55474	-0.17757	0.59848	0.42092	387.207	393.879	24.737	12.242	0.40369	24.737	24.53	24.933	0		0	0	0	0.13115	1	7086	17.026	6.1961	1	0.17299	0.18527	0
TVYSVFGFSFK	11	1	0	Unmodified	_TVYSVFGFSFK_			0	0	P26639;P26639-2;G3XAN9;E7ERI3	P26639	P26639	TARS	Threonine--tRNA ligase, cytoplasmic	>sp|P26639|SYTC_HUMAN Threonine--tRNA ligase, cytoplasmic OS=Homo sapiens GN=TARS PE=1 SV=3;>sp|P26639-2|SYTC_HUMAN Isoform 2 of Threonine--tRNA ligase, cytoplasmic OS=Homo sapiens GN=TARS;>tr|G3XAN9|G3XAN9_HUMAN Threonine--tRNA ligase, cytoplasmic OS=Homo	MULTI-MSMS		JACB153_1	MDA-MB-231 R10K8	645.33	2	641.329	1280.64	44102.2	-0.30742	-0.5842	-0.89162	641.83	645.335	67.53	26.506	0.5327	67.53	67.251	67.784	0		0	0	0	0.013238	1	23523	64.55	49.349	1	0.32848	0.012088	0
ARAHVETLR	9	0	2	Unmodified	_ARAHVETLR_			0	0	CON__P15497	CON__P15497	CON__P15497			>P15497 SWISS-PROT:P15497 (Bos taurus) Apolipoprotein A-I precursor	MULTI-MSMS		JACB153_1	MDA-MB-231 R10K8	536.81	2	526.802	1051.59	48779.9	0.34046	1.2655	1.6059	527.805	536.81	42.33	18.106	0.46604	42.33	42.112	42.578	0		0	0	0	0.084103	1	14127	57.598	16.569	1	0.37593	0.40262	0
LQFIADHCPTLR	12	0	1	Unmodified	_LQFIADHCPTLR_			0	0	Q13098-7;Q13098;Q13098-5;C9JFE4;J3KRJ4;J3KSA5;J3QLT0;J3KTB0;J3QS88;J3KRE8;J3QL53;J3QLE8;J3QS84	Q13098-7	Q13098-7	GPS1	COP9 signalosome complex subunit 1	>sp|Q13098-7|CSN1_HUMAN Isoform 2 of COP9 signalosome complex subunit 1 OS=Homo sapiens GN=GPS1;>sp|Q13098|CSN1_HUMAN COP9 signalosome complex subunit 1 OS=Homo sapiens GN=GPS1 PE=1 SV=4;>sp|Q13098-5|CSN1_HUMAN Isoform 4 of COP9 signalosome complex subunit	MULTI-MSMS		JACB153_1	MDA-MB-231 R10K8	494.26	3	490.922	1469.74	49756.1	0.16691	-1.2211	-1.0542	491.255	494.258	37.126	16.374	0.82143	37.126	36.83	37.651	0		0	0	0	0.08293	1	12113	49.929	49.929	1	0.38373	0.049816	0
LAAEATEWQR	10	0	1	Unmodified	_LAAEATEWQR_			0	0	Q96SB4-3;H3BLV9;Q96SB4;B4DS61;Q5R363	Q96SB4-3	Q96SB4-3	SRPK1	SRSF protein kinase 1	>sp|Q96SB4-3|SRPK1_HUMAN Isoform 1 of SRSF protein kinase 1 OS=Homo sapiens GN=SRPK1;>tr|H3BLV9|H3BLV9_HUMAN SRSF protein kinase 1 (Fragment) OS=Homo sapiens GN=SRPK1 PE=1 SV=1;>sp|Q96SB4|SRPK1_HUMAN SRSF protein kinase 1 OS=Homo sapiens GN=SRPK1 PE=1 SV=2	MULTI-MSMS		JACB153_1	MDA-MB-231 R10K8	592.8	2	587.796	1173.58	46188.7	-0.1769	-0.96003	-1.1369	587.795	592.801	29.315	13.775	0.38075	29.315	29.135	29.516	0		0	0	0	0.0011319	1	8968	101.95	60.571	1	0.44285	0.057492	0
KGTDLWLGVDALGLNIYEK	19	2	0	Unmodified	_KGTDLWLGVDALGLNIYEK_			0	0	P15311;E7EQR4	P15311	P15311	EZR	Ezrin	>sp|P15311|EZRI_HUMAN Ezrin OS=Homo sapiens GN=EZR PE=1 SV=4;>tr|E7EQR4|E7EQR4_HUMAN Ezrin OS=Homo sapiens GN=EZR PE=1 SV=2	MULTI-MSMS		JACB153_1	MDA-MB-231 R10K8	708.06	3	702.381	2104.12	42361.6	-0.30713	0.14027	-0.16686	702.381	707.724	69.934	27.308	0.58266	69.934	69.701	70.284	0		0	0	0	0.00030042	1	24372	88.176	88.176	1	0.48995	0.53093	0
YSLLPFWYTLLYQAHR	16	0	1	Unmodified	_YSLLPFWYTLLYQAHR_			0	0	Q14697;F5H6X6;Q14697-2;E9PKU7	Q14697;Q14697-2	Q14697-2	GANAB	Neutral alpha-glucosidase AB	>sp|Q14697|GANAB_HUMAN Neutral alpha-glucosidase AB OS=Homo sapiens GN=GANAB PE=1 SV=3;>tr|F5H6X6|F5H6X6_HUMAN Neutral alpha-glucosidase AB OS=Homo sapiens GN=GANAB PE=1 SV=1;>sp|Q14697-2|GANAB_HUMAN Isoform 2 of Neutral alpha-glucosidase AB OS=Homo sapien	MULTI-MSMS		JACB153_1	MDA-MB-231 R10K8	694.37	3	691.032	2070.07	42200.6	-0.3119	-0.0052915	-0.31719	691.366	694.702	82.154	31.384	0.74087	82.154	81.779	82.519	0		0	0	0	0.0015751	1	28654	78.505	78.505	1	0.49812	0.064667	0
ELLEQLR	7	0	1	Unmodified	_ELLEQLR_			0	0	REV__F8W6J8	REV__F8W6J8	REV__F8W6J8			>tr|F8W6J8|F8W6J8_HUMAN Coiled-coil domain-containing protein 103 (Fragment) OS=Homo sapiens GN=CCDC103 PE=4 SV=1	MULTI-MSMS		JACB153_1	MDA-MB-231 R10K8	455.76	2	450.761	899.508	50774.4	-0.51077	2.5064	1.9956	450.763	455.765	33.941	15.317	0.57629	33.941	33.743	34.32	0		0	0	0	0.0070205	1	10793	105.12	0	1	0.54109	0.070246	0
AQYGHPSPLGMAAR	14	0	1	Acetyl (Protein N-term),Oxidation (M)	_(ac)AQYGHPSPLGM(ox)AAR_	AQYGHPSPLGM(1)AAR	AQYGHPSPLGM(6.88)AAR	1	1	Q8TF42	Q8TF42	Q8TF42	UBASH3B	Ubiquitin-associated and SH3 domain-containing protein B	>sp|Q8TF42|UBS3B_HUMAN Ubiquitin-associated and SH3 domain-containing protein B OS=Homo sapiens GN=UBASH3B PE=1 SV=2	MULTI-SECPEP		JACB153_1	MDA-MB-231 R10K8	757.41	2	757.364	1512.71	42349.5	-0.4736	3.7293	3.2557	757.869	762.873	80.02	30.674	0.31665	80.02	79.867	80.183	7.6294e-06		0	0	0	0.12327	1	27963	6.8814	0.58345	1	0.63699	0.082696	0
ILQEAWTEGR	10	0	1	Unmodified	_ILQEAWTEGR_			0	0	E7ERK9;Q9UI10-2;Q9UI10;Q9UI10-3	E7ERK9	E7ERK9	EIF2B4	Translation initiation factor eIF-2B subunit delta	>tr|E7ERK9|E7ERK9_HUMAN Translation initiation factor eIF-2B subunit delta OS=Homo sapiens GN=EIF2B4 PE=1 SV=1;>sp|Q9UI10-2|EI2BD_HUMAN Isoform 2 of Translation initiation factor eIF-2B subunit delta OS=Homo sapiens GN=EIF2B4;>sp|Q9UI10|EI2BD_HUMAN Transla	MULTI-SECPEP		JACB153_1	MDA-MB-231 R10K8	606.77	2	601.812	1201.61	44777.5	-0.58251	1.1351	0.55262	601.812	606.818	36.195	16.067	0.44339	36.195	35.979	36.423	3.8147e-06		0	0	0	0.0060376	1	11734	68.536	17.731	1	0.6557	0.085125	0
DVLEVGELAK	10	1	0	Unmodified	_DVLEVGELAK_			0	0	Q9GZZ1;E7EQ69;C9J5D1;C9JZU6	Q9GZZ1	Q9GZZ1	NAA50	N-alpha-acetyltransferase 50	>sp|Q9GZZ1|NAA50_HUMAN N-alpha-acetyltransferase 50 OS=Homo sapiens GN=NAA50 PE=1 SV=1;>tr|E7EQ69|E7EQ69_HUMAN N-alpha-acetyltransferase 50 OS=Homo sapiens GN=NAA50 PE=1 SV=1;>tr|C9J5D1|C9J5D1_HUMAN N-alpha-acetyltransferase 50 OS=Homo sapiens GN=NAA50 PE=	MULTI-MSMS		JACB153_1	MDA-MB-231 R10K8	540.8	2	536.798	1071.58	46623.4	0.16539	-0.27701	-0.11162	537.299	540.805	47.298	19.769	0.54993	47.298	46.993	47.543	0		0	0	0	0.0082402	1	16113	69.979	69.979	1	0.66577	0.023363	0
DLIDEGHAATQLVNQLHDVVVENNLSDK	28	1	0	Unmodified	_DLIDEGHAATQLVNQLHDVVVENNLSDK_			0	0	P35249;C9JZI1;H7C1P0	P35249	P35249	RFC4	Replication factor C subunit 4	>sp|P35249|RFC4_HUMAN Replication factor C subunit 4 OS=Homo sapiens GN=RFC4 PE=1 SV=2;>tr|C9JZI1|C9JZI1_HUMAN Replication factor C subunit 4 OS=Homo sapiens GN=RFC4 PE=1 SV=1;>tr|H7C1P0|H7C1P0_HUMAN Replication factor C subunit 4 (Fragment) OS=Homo sapien	MULTI-MSMS		JACB153_1	MDA-MB-231 R10K8	774.89	4	772.39	3085.53	39602.9	-0.59481	0.73129	0.13649	772.893	774.895	70.517	27.504	0.68786	70.517	70.17	70.858	0		0	0	0	0.0018745	1	24636	72.425	72.425	1	0.66996	0.022167	0
DFLLTAR	7	0	1	Unmodified	_DFLLTAR_			0	0	P63173;J3QL01;J3KT73;J3KSP2	P63173	P63173	RPL38	60S ribosomal protein L38	>sp|P63173|RL38_HUMAN 60S ribosomal protein L38 OS=Homo sapiens GN=RPL38 PE=1 SV=2;>tr|J3QL01|J3QL01_HUMAN 60S ribosomal protein L38 OS=Homo sapiens GN=RPL38 PE=1 SV=1;>tr|J3KT73|J3KT73_HUMAN 60S ribosomal protein L38 OS=Homo sapiens GN=RPL38 PE=1 SV=1;>tr	MULTI-MSMS		JACB153_1	MDA-MB-231 R10K8	423.24	2	418.237	834.46	54110.9	0.17486	1.5624	1.7373	418.238	423.241	45.389	19.129	0.46009	45.389	45.124	45.584	0		0	0	0	0.013513	1	15347	78.496	8.2286	1	0.67397	0.087497	0
KIDYFER	7	1	1	Unmodified	_KIDYFER_			0	0	Q14152;F5H335	Q14152	Q14152	EIF3A	Eukaryotic translation initiation factor 3 subunit A	>sp|Q14152|EIF3A_HUMAN Eukaryotic translation initiation factor 3 subunit A OS=Homo sapiens GN=EIF3A PE=1 SV=1;>tr|F5H335|F5H335_HUMAN Eukaryotic translation initiation factor 3 subunit A OS=Homo sapiens GN=EIF3A PE=1 SV=1	MULTI-MSMS		JACB153_1	MDA-MB-231 R10K8	494.76	2	485.753	969.492	49644.3	0.070494	1.6629	1.7334	485.754	494.765	24.087	12.031	0.3108	24.087	23.912	24.223	-1.9073e-06		0	0	0	0.024717	1	6850	59.8	29.23	1	0.67865	1.0001	0
GENLVSMTVEGPPPK	15	1	0	Unmodified	_GENLVSMTVEGPPPK_			0	0	P14678-3;B3KVR1;P14678;P63162;P14678-2;J3QLE5	P14678-3	P14678-3	SNRPN;SNRPB	Small nuclear ribonucleoprotein-associated protein;Small nuclear ribonucleoprotein-associated proteins B and B;Small nuclear ribonucleoprotein-associated protein N	>sp|P14678-3|RSMB_HUMAN Isoform SM-B1 of Small nuclear ribonucleoprotein-associated proteins B and B OS=Homo sapiens GN=SNRPB;>tr|B3KVR1|B3KVR1_HUMAN Small nuclear ribonucleoprotein-associated protein OS=Homo sapiens GN=SNRPN PE=2 SV=1;>sp|P14678|RSMB_HUM	MULTI-MSMS		JACB153_1	MDA-MB-231 R10K8	782.4	2	777.895	1553.78	40089.6	-0.58515	0.54437	-0.040777	778.397	781.903	42.692	18.234	1.0023	42.692	42.399	43.401	0		0	0	0	2.6492e-05	1	14328	94.487	87.801	1	0.73568	0.027501	0
YSTDVSVDEVK	11	1	0	Unmodified	_YSTDVSVDEVK_			0	0	P00367;B4DGN5;P49448	P00367	P00367	GLUD1;GLUD2	Glutamate dehydrogenase 1, mitochondrial;Glutamate dehydrogenase;Glutamate dehydrogenase 2, mitochondrial	>sp|P00367|DHE3_HUMAN Glutamate dehydrogenase 1, mitochondrial OS=Homo sapiens GN=GLUD1 PE=1 SV=2;>tr|B4DGN5|B4DGN5_HUMAN Glutamate dehydrogenase OS=Homo sapiens GN=GLUD1 PE=1 SV=1;>sp|P49448|DHE4_HUMAN Glutamate dehydrogenase 2, mitochondrial OS=Homo sapi	MULTI-MSMS		JACB153_1	MDA-MB-231 R10K8	625.31	2	621.298	1240.58	43394.9	-0.39596	1.2489	0.85298	621.3	625.306	29.971	13.992	0.41373	29.971	29.719	30.133	0		0	0	0	0.00075771	1	9261	96.103	96.103	1	0.73813	0.022362	0
LFQSNDPTLR	10	0	1	Unmodified	_LFQSNDPTLR_			0	0	Q9Y678	Q9Y678	Q9Y678	COPG1	Coatomer subunit gamma-1	>sp|Q9Y678|COPG1_HUMAN Coatomer subunit gamma-1 OS=Homo sapiens GN=COPG1 PE=1 SV=1	MULTI-MSMS		JACB153_1	MDA-MB-231 R10K8	600.81	2	595.812	1189.61	44580.4	-0.11907	1.3065	1.1874	596.316	600.816	32.646	14.885	0.98468	32.646	32.178	33.163	0		0	0	0	0.0018276	1	10270	91.855	43.986	1	0.75452	0.097955	0
AVPPTYADLGK	11	1	0	Acetyl (Protein N-term)	_(ac)AVPPTYADLGK_			1	0	P21796;C9JI87	P21796	P21796	VDAC1	Voltage-dependent anion-selective channel protein 1	>sp|P21796|VDAC1_HUMAN Voltage-dependent anion-selective channel protein 1 OS=Homo sapiens GN=VDAC1 PE=1 SV=2;>tr|C9JI87|C9JI87_HUMAN Voltage-dependent anion-selective channel protein 1 (Fragment) OS=Homo sapiens GN=VDAC1 PE=1 SV=1	MULTI-MSMS		JACB153_1	MDA-MB-231 R10K8	591.32	2	587.311	1172.61	44226.9	-0.0013469	1.9505	1.9491	587.814	591.318	53.043	21.685	1.2189	53.043	52.351	53.57	0		0	0	0	0.0074295	2	18197	71.555	71.555	1	0.76334	0.026042	0
HFLVEDK	7	1	0	Unmodified	_HFLVEDK_			0	0	P53992;E7EP00;B4DZT4	P53992	P53992	SEC24C	Protein transport protein Sec24C	>sp|P53992|SC24C_HUMAN Protein transport protein Sec24C OS=Homo sapiens GN=SEC24C PE=1 SV=3;>tr|E7EP00|E7EP00_HUMAN Protein transport protein Sec24C OS=Homo sapiens GN=SEC24C PE=1 SV=2;>tr|B4DZT4|B4DZT4_HUMAN Protein transport protein Sec24C OS=Homo sapien	MULTI-MSMS		JACB153_1	MDA-MB-231 R10K8	448.24	2	444.235	886.455	51583.5	-0.12367	-3.2406	-3.3643	444.235	448.242	19.809	10.603	0.43604	19.809	19.542	19.978	0		0	0	0	0.013125	1	5188	79.469	34.156	1	0.77345	0.036805	0
VFDFELSSQDMTTLLSYNR	19	0	1	Unmodified	_VFDFELSSQDMTTLLSYNR_			0	0	P15121	P15121	P15121	AKR1B1	Aldose reductase	>sp|P15121|ALDR_HUMAN Aldose reductase OS=Homo sapiens GN=AKR1B1 PE=1 SV=3	MULTI-MSMS		JACB153_1	MDA-MB-231 R10K8	1139.55	2	1133.54	2265.06	32186.9	-0.44656	0.40567	-0.04089	1133.54	1138.55	79.21	30.399	0.80479	79.21	78.718	79.523	0		0	0	0	0.0018212	1	27753	62.765	62.765	1	0.78197	0.10152	0
SVTAFFK	7	1	0	Unmodified	_SVTAFFK_			0	0	Q04637-9;Q04637-8;Q04637;E7EUU4;Q04637-3;E9PGM1;Q04637-4;E7EX73;Q04637-5;Q04637-7;Q04637-6	Q04637-9	Q04637-9	EIF4G1	Eukaryotic translation initiation factor 4 gamma 1	>sp|Q04637-9|IF4G1_HUMAN Isoform 9 of Eukaryotic translation initiation factor 4 gamma 1 OS=Homo sapiens GN=EIF4G1;>sp|Q04637-8|IF4G1_HUMAN Isoform 8 of Eukaryotic translation initiation factor 4 gamma 1 OS=Homo sapiens GN=EIF4G1;>sp|Q04637|IF4G1_HUMAN Euk	MULTI-MSMS		JACB153_1	MDA-MB-231 R10K8	404.23	2	400.221	798.428	55479.4	0.16907	1.145	1.3141	400.222	404.228	37.606	16.537	0.49888	37.606	37.371	37.87	0		0	0	0	0.038803	1	12288	55.717	38.753	1	0.79937	0.024876	0
YSQTGNYELAVALSR	15	0	1	Unmodified	_YSQTGNYELAVALSR_			0	0	P39656;E7EWT1	P39656	P39656	DDOST	Dolichyl-diphosphooligosaccharide--protein glycosyltransferase 48 kDa subunit	>sp|P39656|OST48_HUMAN Dolichyl-diphosphooligosaccharide--protein glycosyltransferase 48 kDa subunit OS=Homo sapiens GN=DDOST PE=1 SV=4;>tr|E7EWT1|E7EWT1_HUMAN Dolichyl-diphosphooligosaccharide--protein glycosyltransferase 48 kDa subunit OS=Homo sapiens GN	MULTI-MSMS		JACB153_1	MDA-MB-231 R10K8	841.43	2	836.42	1670.83	38499.4	-0.44831	-0.3944	-0.84271	837.422	841.425	48.365	20.12	0.36621	48.365	48.188	48.554	0		0	0	0	0.0030737	1	16484	71.354	71.354	1	0.81139	0.10534	0
GLVVLGFPCNQFGHQENAK	19	1	0	Unmodified	_GLVVLGFPCNQFGHQENAK_			0	0	P07203	P07203	P07203	GPX1	Glutathione peroxidase 1	>sp|P07203|GPX1_HUMAN Glutathione peroxidase 1 OS=Homo sapiens GN=GPX1 PE=1 SV=4	MULTI-SECPEP		JACB153_1	MDA-MB-231 R10K8	707.9	3	705.686	2114.04	41156.9	-0.16728	-2.1867	-2.354	706.019	708.691	50.263	20.753	0.54675	50.263	50.064	50.611	0		0	0	0	0.11043	1	17183	21.667	31.462	1	0.83709	0.031175	0
SMGGAAIAPPTSLVEK	16	1	0	Unmodified	_SMGGAAIAPPTSLVEK_			0	0	Q96I25;Q5W010;Q5W011;Q5W012;H0Y6J6	Q96I25	Q96I25	RBM17	Splicing factor 45	>sp|Q96I25|SPF45_HUMAN Splicing factor 45 OS=Homo sapiens GN=RBM17 PE=1 SV=1;>tr|Q5W010|Q5W010_HUMAN Splicing factor 45 (Fragment) OS=Homo sapiens GN=RBM17 PE=1 SV=1;>tr|Q5W011|Q5W011_HUMAN Splicing factor 45 (Fragment) OS=Homo sapiens GN=RBM17 PE=1 SV=1;>	MULTI-MSMS		JACB153_1	MDA-MB-231 R10K8	768.91	2	764.906	1527.8	39931.1	-0.63095	0.21188	-0.41907	764.907	768.913	44.814	18.936	0.49533	44.814	44.648	45.144	-3.8147e-06		0	0	0	0.044953	1	15105	55.011	55.011	1	0.84496	0.030065	0
NYGILADATEQVGQHK	16	1	0	Unmodified	_NYGILADATEQVGQHK_			0	0	Q9BZZ5;G3V1C3;Q9BZZ5-2;Q9BZZ5-3;E9PQK6	Q9BZZ5	Q9BZZ5	API5	Apoptosis inhibitor 5	>sp|Q9BZZ5|API5_HUMAN Apoptosis inhibitor 5 OS=Homo sapiens GN=API5 PE=1 SV=3;>tr|G3V1C3|G3V1C3_HUMAN Apoptosis inhibitor 5 OS=Homo sapiens GN=API5 PE=1 SV=1;>sp|Q9BZZ5-2|API5_HUMAN Isoform 2 of Apoptosis inhibitor 5 OS=Homo sapiens GN=API5;>sp|Q9BZZ5-3|AP	MULTI-MSMS		JACB153_1	MDA-MB-231 R10K8	584.63	3	581.96	1742.86	45518	0.19239	-0.098761	0.093631	582.295	584.631	38.654	16.881	0.49238	38.654	38.436	38.928	0		0	0	0	2.3951e-06	1	12702	120.3	120.3	1	0.85107	0.02443	0
QAEMEGAVQSIQGELSK	17	1	0	Unmodified	_QAEMEGAVQSIQGELSK_			0	0	Q6NZI2;Q6NZI2-2	Q6NZI2	Q6NZI2	PTRF	Polymerase I and transcript release factor	>sp|Q6NZI2|PTRF_HUMAN Polymerase I and transcript release factor OS=Homo sapiens GN=PTRF PE=1 SV=1;>sp|Q6NZI2-2|PTRF_HUMAN Isoform 2 of Polymerase I and transcript release factor OS=Homo sapiens GN=PTRF	MULTI-MSMS		JACB153_1	MDA-MB-231 R10K8	604.97	3	602.296	1803.87	45448	0.053925	-0.15721	-0.10329	602.966	604.968	49.156	20.389	0.68913	49.156	48.892	49.581	0		0	0	0	0.00082382	1	16805	82.121	79.06	1	0.85504	0.025772	0
INMVEELEK	9	1	0	Unmodified	_INMVEELEK_			0	0	Q15046-2;Q15046	Q15046-2	Q15046-2	KARS	Lysine--tRNA ligase	>sp|Q15046-2|SYK_HUMAN Isoform Mitochondrial of Lysine--tRNA ligase OS=Homo sapiens GN=KARS;>sp|Q15046|SYK_HUMAN Lysine--tRNA ligase OS=Homo sapiens GN=KARS PE=1 SV=3	MULTI-MSMS		JACB153_1	MDA-MB-231 R10K8	557.29	2	552.784	1103.55	47341	0.13346	-1.0683	-0.93483	552.784	557.289	41.742	17.918	0.56128	41.742	41.386	41.947	0		0	0	0	0.0071639	1	13918	72.848	39.623	1	0.93912	0.025617	0
IIVDDDDSK	9	1	0	Unmodified	_IIVDDDDSK_			0	0	Q9NZD8;Q9NZD8-2;H0YKB0;H0YMB7;H0YKM6;H0YLT5;H0YLW1;H0YLD7;H0YML6	Q9NZD8	Q9NZD8	SPG21	Maspardin	>sp|Q9NZD8|SPG21_HUMAN Maspardin OS=Homo sapiens GN=SPG21 PE=1 SV=1;>sp|Q9NZD8-2|SPG21_HUMAN Isoform 2 of Maspardin OS=Homo sapiens GN=SPG21;>tr|H0YKB0|H0YKB0_HUMAN Maspardin (Fragment) OS=Homo sapiens GN=SPG21 PE=1 SV=1;>tr|H0YMB7|H0YMB7_HUMAN Maspardin (	MULTI-SECPEP		JACB153_1	MDA-MB-231 R10K8	514.79	2	510.248	1018.48	48071.4	0.099046	-2.6324	-2.5333	510.248	514.254	21.263	11.086	0.4601	21.263	21.081	21.541	0		0	0	0	0.098677	1	5789	35.511	22.158	1	0.98062	0.034843	0
LGLLGLPAPK	10	1	0	Unmodified	_LGLLGLPAPK_			0	0	Q99459	Q99459	Q99459	CDC5L	Cell division cycle 5-like protein	>sp|Q99459|CDC5L_HUMAN Cell division cycle 5-like protein OS=Homo sapiens GN=CDC5L PE=1 SV=2	MULTI-SECPEP		JACB153_1	MDA-MB-231 R10K8	492.92	2	489.821	977.627	50392.6	0.27359	-0.64435	-0.37076	489.82	493.828	53.275	21.763	0.41302	53.275	53.071	53.484	0		0	0	0	0.055315	1	18362	36.585	44.318	1	1.003	0.036226	0
STESLQANVQR	11	0	1	Unmodified	_STESLQANVQR_			0	0	P26373;J3QSB4	P26373	P26373	RPL13	60S ribosomal protein L13	>sp|P26373|RL13_HUMAN 60S ribosomal protein L13 OS=Homo sapiens GN=RPL13 PE=1 SV=4;>tr|J3QSB4|J3QSB4_HUMAN 60S ribosomal protein L13 (Fragment) OS=Homo sapiens GN=RPL13 PE=1 SV=1	MULTI-MSMS		JACB153_1	MDA-MB-231 R10K8	621.82	2	616.815	1231.62	45296	-0.47827	1.7668	1.2886	617.319	621.819	20.347	10.782	0.39632	20.347	20.186	20.582	0		0	0	0	1.0157e-06	1	5385	185.29	174.54	1	1.015	0.13176	0
VFDFELSSQDMTTLLSYNR	19	0	1	Unmodified	_VFDFELSSQDMTTLLSYNR_			0	0	P15121	P15121	P15121	AKR1B1	Aldose reductase	>sp|P15121|ALDR_HUMAN Aldose reductase OS=Homo sapiens GN=AKR1B1 PE=1 SV=3	MULTI-MSMS		JACB153_1	MDA-MB-231 R10K8	759.7	3	756.028	2265.06	40780.3	-0.47865	-0.3223	-0.80095	756.027	759.699	79.252	30.418	0.83739	79.252	78.769	79.606	0		0	0	0	0.050117	1	27697	53.278	53.278	1	1.016	0.1319	0
ALIAAQYSGAQVR	13	0	1	Unmodified	_ALIAAQYSGAQVR_			0	0	P26641;B4DTG2	P26641	P26641	EEF1G	Elongation factor 1-gamma	>sp|P26641|EF1G_HUMAN Elongation factor 1-gamma OS=Homo sapiens GN=EEF1G PE=1 SV=3;>tr|B4DTG2|B4DTG2_HUMAN Elongation factor 1-gamma OS=Homo sapiens GN=EEF1G PE=1 SV=1	MULTI-MSMS		JACB153_1	MDA-MB-231 R10K8	453.59	3	449.917	1346.73	52055.7	-0.53689	-0.21347	-0.75036	450.251	453.254	34.357	15.454	0.52206	34.357	34.021	34.543	0		0	0	0	0.00011923	1	10978	113.77	61.075	1	1.022	0.13268	0
LAATNALLNSLEFTK	15	1	0	Unmodified	_LAATNALLNSLEFTK_			0	0	Q14974;Q14974-2;J3KTM9;F5H4R7	Q14974	Q14974	KPNB1	Importin subunit beta-1	>sp|Q14974|IMB1_HUMAN Importin subunit beta-1 OS=Homo sapiens GN=KPNB1 PE=1 SV=2;>sp|Q14974-2|IMB1_HUMAN Isoform 2 of Importin subunit beta-1 OS=Homo sapiens GN=KPNB1;>tr|J3KTM9|J3KTM9_HUMAN Importin subunit beta-1 (Fragment) OS=Homo sapiens GN=KPNB1 PE=1	MULTI-MSMS		JACB153_1	MDA-MB-231 R10K8	538.97	3	535.966	1604.88	48378.1	0.51932	-1.1924	-0.67303	536.299	538.638	63.151	25.046	0.53099	63.151	62.831	63.362	0		0	0	0	1.342e-05	1	21965	109.83	70.206	1	1.0596	0.042602	0
SPLPIVR	7	0	1	Unmodified	_SPLPIVR_			0	0	Q15021;F5GZJ1	Q15021	Q15021	NCAPD2	Condensin complex subunit 1	>sp|Q15021|CND1_HUMAN Condensin complex subunit 1 OS=Homo sapiens GN=NCAPD2 PE=1 SV=3;>tr|F5GZJ1|F5GZJ1_HUMAN Condensin complex subunit 1 OS=Homo sapiens GN=NCAPD2 PE=1 SV=1	MULTI-MSMS		JACB153_1	MDA-MB-231 R10K8	396.25	2	391.25	780.486	56093.8	0.076842	-0.9849	-0.90805	391.249	396.254	32.341	14.777	0.41454	32.341	32.098	32.512	0		0	0	0	0.015137	1	10176	74.415	31.349	1	1.1044	0.14338	0
ALMGLYHGQVLCK	13	1	0	Unmodified	_ALMGLYHGQVLCK_			0	0	P40939	P40939	P40939	HADHA	Trifunctional enzyme subunit alpha, mitochondrial;Long-chain enoyl-CoA hydratase;Long chain 3-hydroxyacyl-CoA dehydrogenase	>sp|P40939|ECHA_HUMAN Trifunctional enzyme subunit alpha, mitochondrial OS=Homo sapiens GN=HADHA PE=1 SV=2	MULTI-MSMS		JACB153_1	MDA-MB-231 R10K8	499.93	3	497.26	1488.76	49992.2	0.29637	0.15817	0.45454	497.595	499.931	37.839	16.61	0.50053	37.839	37.651	38.152	-3.8147e-06		0	0	0	0.0072884	1	12381	74.76	74.76	1	1.1384	0.039953	0
VYSLDDIR	8	0	1	Unmodified	_VYSLDDIR_			0	0	Q14566	Q14566	Q14566	MCM6	DNA replication licensing factor MCM6	>sp|Q14566|MCM6_HUMAN DNA replication licensing factor MCM6 OS=Homo sapiens GN=MCM6 PE=1 SV=1	MULTI-MSMS		JACB153_1	MDA-MB-231 R10K8	495.76	2	490.756	979.497	49794.2	0.31186	0.21671	0.52857	490.756	495.76	38.577	16.861	0.58128	38.577	38.376	38.957	0		0	0	0	0.01053	1	12690	68.735	56.108	1	1.1509	0.14942	0
ISWEEYK	7	1	0	Unmodified	_ISWEEYK_			0	0	Q15293;B7Z1M1	Q15293	Q15293	RCN1	Reticulocalbin-1	>sp|Q15293|RCN1_HUMAN Reticulocalbin-1 OS=Homo sapiens GN=RCN1 PE=1 SV=1;>tr|B7Z1M1|B7Z1M1_HUMAN Reticulocalbin-1 OS=Homo sapiens GN=RCN1 PE=1 SV=1	MULTI-MSMS		JACB153_1	MDA-MB-231 R10K8	481.74	2	477.732	953.449	50830.8	0.68257	-0.2208	0.46176	477.732	481.739	35.506	15.835	0.5621	35.506	35.254	35.816	3.8147e-06		0	0	0	0.0071002	1	11431	102.71	99.321	1	1.1698	0.030462	0
EVGEHLVSIK	10	1	0	Unmodified	_EVGEHLVSIK_			0	0	O75369;O75369-9;O75369-2;O75369-3;O75369-6;O75369-7;E7EN95;O75369-4;O75369-5;O75369-8	O75369;O75369-8	O75369-8	FLNB	Filamin-B	>sp|O75369|FLNB_HUMAN Filamin-B OS=Homo sapiens GN=FLNB PE=1 SV=2;>sp|O75369-9|FLNB_HUMAN Isoform 9 of Filamin-B OS=Homo sapiens GN=FLNB;>sp|O75369-2|FLNB_HUMAN Isoform 2 of Filamin-B OS=Homo sapiens GN=FLNB;>sp|O75369-3|FLNB_HUMAN Isoform 3 of Filamin-B O	MULTI-MSMS		JACB153_1	MDA-MB-231 R10K8	559.82	2	555.811	1109.61	47055.5	-0.2125	0.25638	0.043886	555.811	559.818	25.858	12.615	0.53109	25.858	25.61	26.141	1.9073e-06		0	0	0	0.0010458	1	7565	108.47	85.996	1	1.2001	0.041765	0
VDGMDILCVR	10	0	1	Unmodified	_VDGMDILCVR_			0	0	P08559-4;P08559-2;P08559;P08559-3	P08559-4	P08559-4	PDHA1	Pyruvate dehydrogenase E1 component subunit alpha, somatic form, mitochondrial	>sp|P08559-4|ODPA_HUMAN Isoform 4 of Pyruvate dehydrogenase E1 component subunit alpha, somatic form, mitochondrial OS=Homo sapiens GN=PDHA1;>sp|P08559-2|ODPA_HUMAN Isoform 2 of Pyruvate dehydrogenase E1 component subunit alpha, somatic form, mitochondrial	MULTI-MSMS		JACB153_1	MDA-MB-231 R10K8	594.29	2	589.289	1176.56	45803.3	-0.04464	0.87153	0.82689	589.29	594.293	52.435	21.478	0.48995	52.435	52.203	52.693	0		0	0	0	0.0010463	1	18004	108.43	99.85	1	1.2079	0.15681	0
QELEAELAK	9	1	0	Unmodified	_QELEAELAK_			0	0	Q15149-4;Q15149;Q15149-2;Q15149-6;Q15149-5;Q15149-9;Q15149-8;Q15149-7;Q15149-3	Q15149-4	Q15149-4	PLEC	Plectin	>sp|Q15149-4|PLEC_HUMAN Isoform 4 of Plectin OS=Homo sapiens GN=PLEC;>sp|Q15149|PLEC_HUMAN Plectin OS=Homo sapiens GN=PLEC PE=1 SV=3;>sp|Q15149-2|PLEC_HUMAN Isoform 2 of Plectin OS=Homo sapiens GN=PLEC;>sp|Q15149-6|PLEC_HUMAN Isoform 6 of Plectin OS=Homo s	MULTI-MSMS		JACB153_1	MDA-MB-231 R10K8	519.78	2	515.774	1029.53	53102.4	-0.056414	0.87562	0.8192	515.774	519.783	27.825	13.272	0.29231	27.825	27.654	27.946	0		0	0	0	0.072062	1	8364	50.108	13.774	1	1.2254	0.052	0
GTVEPQLEAR	10	0	1	Unmodified	_GTVEPQLEAR_			0	0	P21333;P21333-2;Q5HY54;F8WE98	P21333	P21333	FLNA	Filamin-A	>sp|P21333|FLNA_HUMAN Filamin-A OS=Homo sapiens GN=FLNA PE=1 SV=4;>sp|P21333-2|FLNA_HUMAN Isoform 2 of Filamin-A OS=Homo sapiens GN=FLNA;>tr|Q5HY54|Q5HY54_HUMAN Filamin-A OS=Homo sapiens GN=FLNA PE=1 SV=1;>tr|F8WE98|F8WE98_HUMAN Filamin-A (Fragment) OS=Hom	MULTI-MSMS		JACB153_1	MDA-MB-231 R10K8	555.3	2	550.291	1098.57	47310.1	-0.05743	2.0518	1.9944	550.795	555.295	24.509	12.172	0.4511	24.509	24.27	24.722	0		0	0	0	1.6724e-05	1	7012	163.64	132.04	1	1.2863	0.16699	0
YPTFIDALR	9	0	1	Unmodified	_YPTFIDALR_			0	0	O00541;O00541-2;B5MCF9	O00541	O00541	PES1	Pescadillo homolog	>sp|O00541|PESC_HUMAN Pescadillo homolog OS=Homo sapiens GN=PES1 PE=1 SV=1;>sp|O00541-2|PESC_HUMAN Isoform 2 of Pescadillo homolog OS=Homo sapiens GN=PES1;>tr|B5MCF9|B5MCF9_HUMAN Pescadillo homolog OS=Homo sapiens GN=PES1 PE=1 SV=1	MULTI-MSMS		JACB153_1	MDA-MB-231 R10K8	553.3	2	548.295	1094.58	47624.2	0.36734	-0.11527	0.25207	548.295	553.299	56.213	22.739	0.61098	56.213	55.93	56.541	0		0	0	0	0.0064585	1	19454	75.294	61.524	1	1.331	0.17279	0
IFSQETLTK	9	1	0	Unmodified	_IFSQETLTK_			0	0	Q9UHG3;B7Z9P8;B7Z3Y2	Q9UHG3	Q9UHG3	PCYOX1	Prenylcysteine oxidase 1	>sp|Q9UHG3|PCYOX_HUMAN Prenylcysteine oxidase 1 OS=Homo sapiens GN=PCYOX1 PE=1 SV=3;>tr|B7Z9P8|B7Z9P8_HUMAN Prenylcysteine oxidase 1 OS=Homo sapiens GN=PCYOX1 PE=1 SV=1;>tr|B7Z3Y2|B7Z3Y2_HUMAN Prenylcysteine oxidase 1 OS=Homo sapiens GN=PCYOX1 PE=1 SV=1	MULTI-MSMS		JACB153_1	MDA-MB-231 R10K8	537.8	2	533.793	1065.57	47611.8	0.12856	-0.033631	0.094929	533.792	537.8	29.532	13.843	0.54119	29.532	29.345	29.887	1.9073e-06		0	0	0	0.0073382	1	9029	72.243	26.242	1	1.3915	0.056549	0
TTPYQIACGISQGLADNTVIAK	22	1	0	Unmodified	_TTPYQIACGISQGLADNTVIAK_			0	0	P26639;D6R9F8	P26639	P26639	TARS	Threonine--tRNA ligase, cytoplasmic	>sp|P26639|SYTC_HUMAN Threonine--tRNA ligase, cytoplasmic OS=Homo sapiens GN=TARS PE=1 SV=3;>tr|D6R9F8|D6R9F8_HUMAN Threonine--tRNA ligase, cytoplasmic (Fragment) OS=Homo sapiens GN=TARS PE=1 SV=1	MULTI-MSMS		JACB153_1	MDA-MB-231 R10K8	777.4	3	774.398	2320.17	39167.6	-0.52195	1.5609	1.039	775.068	777.07	67.239	26.415	0.7804	67.239	66.851	67.631	0		0	0	0	0.0019248	1	23462	70.917	64.147	1	1.4102	0.047206	0
LSVDYGK	7	1	0	Unmodified	_LSVDYGK_			0	0	Q71U36;Q71U36-2;Q13748;Q13748-2;F8VQQ4;F5H5D3;Q9BQE3;P68366;A8MUB1;C9JDS9;C9JJQ8;C9JQ00;C9JEV8;P68363;CON__ENSEMBL:ENSBTAP00000016242	Q71U36;F5H5D3;P68366;P68363	P68363	TUBA1A;TUBA3C;TUBA1C;TUBA4A;TUBA1B	Tubulin alpha-1A chain;Tubulin alpha-3C/D chain;Tubulin alpha-1C chain;Tubulin alpha-4A chain;Tubulin alpha-1B chain	>sp|Q71U36|TBA1A_HUMAN Tubulin alpha-1A chain OS=Homo sapiens GN=TUBA1A PE=1 SV=1;>sp|Q71U36-2|TBA1A_HUMAN Isoform 2 of Tubulin alpha-1A chain OS=Homo sapiens GN=TUBA1A;>sp|Q13748|TBA3C_HUMAN Tubulin alpha-3C/D chain OS=Homo sapiens GN=TUBA3C PE=1 SV=3;>sp	MULTI-MSMS		JACB153_1	MDA-MB-231 R10K8	395.22	2	391.208	780.402	54633.8	-0.3187	-0.33853	-0.65722	391.207	395.215	23.205	11.733	0.57221	23.205	22.986	23.558	0		0	0	0	0.010817	2	6469	85.265	27.098	1	1.4485	0.021645	0
FVLSQAKDEL	10	1	0	Unmodified	_FVLSQAKDEL_			0	0	Q8NBS9;Q86UY0;Q8NBS9-2	Q8NBS9	Q8NBS9	TXNDC5	Thioredoxin domain-containing protein 5	>sp|Q8NBS9|TXND5_HUMAN Thioredoxin domain-containing protein 5 OS=Homo sapiens GN=TXNDC5 PE=1 SV=2;>tr|Q86UY0|Q86UY0_HUMAN TXNDC5 protein OS=Homo sapiens GN=TXNDC5 PE=1 SV=1;>sp|Q8NBS9-2|TXND5_HUMAN Isoform 2 of Thioredoxin domain-containing protein 5 OS=H	MULTI-MSMS		JACB153_1	MDA-MB-231 R10K8	579.32	2	575.311	1148.61	46936.4	0.29598	-0.29737	-0.0013921	575.816	579.317	43.029	18.343	0.62163	43.029	42.78	43.401	0		0	0	0	0.0029347	1	14404	96.015	85.09	1	1.468	0.049221	0
GDFDVSVPK	9	1	0	Unmodified	_GDFDVSVPK_			0	0	Q09666	Q09666	Q09666	AHNAK	Neuroblast differentiation-associated protein AHNAK	>sp|Q09666|AHNK_HUMAN Neuroblast differentiation-associated protein AHNAK OS=Homo sapiens GN=AHNAK PE=1 SV=2	MULTI-MSMS		JACB153_1	MDA-MB-231 R10K8	486.25	2	482.243	962.471	49754.4	-0.045674	1.1633	1.1176	482.243	486.25	36.478	16.156	0.55777	36.478	36.148	36.705	-3.8147e-06		0	0	0	0.049951	1	11804	54.539	36.554	1	1.4681	0.051437	0
LDQLIYIPLPDEK	13	1	0	Unmodified	_LDQLIYIPLPDEK_			0	0	P55072	P55072	P55072	VCP	Transitional endoplasmic reticulum ATPase	>sp|P55072|TERA_HUMAN Transitional endoplasmic reticulum ATPase OS=Homo sapiens GN=VCP PE=1 SV=4	MULTI-MSMS		JACB153_1	MDA-MB-231 R10K8	522.3	3	519.624	1555.85	49504.7	0.56302	-1.8904	-1.3274	519.958	522.63	67.041	26.342	0.51653	67.041	66.851	67.367	0		0	0	0	0.12563	1	23335	41.621	34.892	1	1.6415	0.07398	0
ELLYGGTSPTAETILK	16	1	0	Unmodified	_ELLYGGTSPTAETILK_			0	0	O95793;O95793-3;O95793-2;Q5JW30	O95793	O95793	STAU1	Double-stranded RNA-binding protein Staufen homolog 1	>sp|O95793|STAU1_HUMAN Double-stranded RNA-binding protein Staufen homolog 1 OS=Homo sapiens GN=STAU1 PE=1 SV=2;>sp|O95793-3|STAU1_HUMAN Isoform 3 of Double-stranded RNA-binding protein Staufen homolog 1 OS=Homo sapiens GN=STAU1;>sp|O95793-2|STAU1_HUMAN Is	MULTI-MSMS		JACB153_1	MDA-MB-231 R10K8	850.96	2	846.956	1691.9	39122.1	-0.50326	0.023849	-0.47941	846.955	850.964	52.894	21.628	0.40829	52.894	52.693	53.101	0		0	0	0	1.096e-05	1	18199	101.42	101.42	1	1.6478	0.055923	0
LAGGDWFTSR	10	0	1	Unmodified	_LAGGDWFTSR_			0	0	P30153;F5H3X9;C9J9C1	P30153	P30153	PPP2R1A	Serine/threonine-protein phosphatase 2A 65 kDa regulatory subunit A alpha isoform	>sp|P30153|2AAA_HUMAN Serine/threonine-protein phosphatase 2A 65 kDa regulatory subunit A alpha isoform OS=Homo sapiens GN=PPP2R1A PE=1 SV=4;>tr|F5H3X9|F5H3X9_HUMAN Serine/threonine-protein phosphatase 2A 65 kDa regulatory subunit A alpha isoform OS=Homo s	MULTI-MSMS		JACB153_1	MDA-MB-231 R10K8	560.27	2	555.272	1108.53	46583.3	0.14314	-0.99487	-0.85173	555.271	560.276	45.067	19.019	0.70737	45.067	44.735	45.442	0		0	0	0	0.0025038	1	15188	89.548	55.016	1	1.8187	0.23611	0
IAQPGDHVSVTGIFLPILR	19	0	1	Unmodified	_IAQPGDHVSVTGIFLPILR_			0	0	P33993;P33993-3;P33993-2;C9J8M6	P33993	P33993	MCM7	DNA replication licensing factor MCM7	>sp|P33993|MCM7_HUMAN DNA replication licensing factor MCM7 OS=Homo sapiens GN=MCM7 PE=1 SV=4;>sp|P33993-3|MCM7_HUMAN Isoform 3 of DNA replication licensing factor MCM7 OS=Homo sapiens GN=MCM7;>sp|P33993-2|MCM7_HUMAN Isoform 2 of DNA replication licensing	MULTI-MSMS		JACB153_1	MDA-MB-231 R10K8	681.73	3	678.39	2032.15	42867.7	-0.39512	0.48499	0.089872	678.724	682.06	66.057	26.019	0.67529	66.057	65.808	66.483	0		0	0	0	0.001378	1	22945	70.335	70.335	1	1.8746	0.24336	0
VINTPEVLR	9	0	1	Unmodified	_VINTPEVLR_			0	0	Q9H223	Q9H223	Q9H223	EHD4	EH domain-containing protein 4	>sp|Q9H223|EHD4_HUMAN EH domain-containing protein 4 OS=Homo sapiens GN=EHD4 PE=1 SV=1	MULTI-MSMS		JACB153_1	MDA-MB-231 R10K8	525.81	2	520.809	1039.6	49445.6	-0.092775	-1.8351	-1.9279	520.809	526.311	34.173	15.387	0.68129	34.173	33.938	34.619	0		0	0	0	0.0016795	1	10980	91.867	7.919	1	1.8819	0.24432	0
EISYAIK	7	1	0	Unmodified	_EISYAIK_			0	0	P50570;P50570-5;P50570-2;F5H4R9;P50570-4;P50570-3;K7EMQ3;Q9UQ16-4;Q9UQ16;Q05193;Q05193-2;Q9UQ16-3;Q9UQ16-2;Q05193-4;Q05193-3;Q05193-5;E5RHK8;Q9UQ16-5;E5RIK2	P50570	P50570	DNM2;DNM3;DNM1	Dynamin-2;Dynamin-3;Dynamin-1	>sp|P50570|DYN2_HUMAN Dynamin-2 OS=Homo sapiens GN=DNM2 PE=1 SV=2;>sp|P50570-5|DYN2_HUMAN Isoform 5 of Dynamin-2 OS=Homo sapiens GN=DNM2;>sp|P50570-2|DYN2_HUMAN Isoform 2 of Dynamin-2 OS=Homo sapiens GN=DNM2;>tr|F5H4R9|F5H4R9_HUMAN Dynamin-2 OS=Homo sapien	MULTI-MSMS		JACB153_1	MDA-MB-231 R10K8	416.24	2	412.232	822.449	53783.5	-0.27585	0.86287	0.58702	412.231	416.239	27.398	13.134	0.47643	27.398	27.124	27.6	0		0	0	0	0.082251	1	8199	40.103	8.8137	1	1.9315	0.078372	0
KLLEATELK	9	2	0	Unmodified	_KLLEATELK_			0	0	Q13813-3;A6NG51;Q13813-2;Q13813	Q13813-3	Q13813-3	SPTAN1	Spectrin alpha chain, brain	>sp|Q13813-3|SPTN1_HUMAN Isoform 3 of Spectrin alpha chain, non-erythrocytic 1 OS=Homo sapiens GN=SPTAN1;>tr|A6NG51|A6NG51_HUMAN Spectrin alpha chain, non-erythrocytic 1 OS=Homo sapiens GN=SPTAN1 PE=1 SV=2;>sp|Q13813-2|SPTN1_HUMAN Isoform 2 of Spectrin alp	MULTI-SECPEP		JACB153_1	MDA-MB-231 R10K8	531.79	2	522.819	1043.62	48264.2	0.13947	-0.77085	-0.63138	522.818	530.833	24.185	12.06	0.29511	24.185	24.019	24.314	0		0	0	0	0.046587	1	6903	60.342	6.051	1	1.947	2.1098	0
VNQAIWLLCTGAR	13	0	1	Unmodified	_VNQAIWLLCTGAR_			0	0	P46782;M0R0F0;M0R0R2;M0QZN2	P46782	P46782	RPS5	40S ribosomal protein S5;40S ribosomal protein S5, N-terminally processed	>sp|P46782|RS5_HUMAN 40S ribosomal protein S5 OS=Homo sapiens GN=RPS5 PE=1 SV=4;>tr|M0R0F0|M0R0F0_HUMAN 40S ribosomal protein S5 (Fragment) OS=Homo sapiens GN=RPS5 PE=1 SV=1;>tr|M0R0R2|M0R0R2_HUMAN 40S ribosomal protein S5 OS=Homo sapiens GN=RPS5 PE=1 SV=1	MULTI-MSMS		JACB153_1	MDA-MB-231 R10K8	504.61	3	501.27	1500.79	49988.9	0.16325	0.53158	0.69483	501.27	504.606	56.674	22.892	0.40963	56.674	56.455	56.864	0		0	0	0	0.0037303	1	19568	84.365	76.188	1	1.9556	0.25388	0
MDPLFQQTHK	10	1	0	Acetyl (Protein N-term)	_(ac)MDPLFQQTHK_			1	0	E7EQ34;O14653-2;O14653;I3L4Z6;O14653-3;I3L1K7	E7EQ34	E7EQ34	GOSR2	Golgi SNAP receptor complex member 2	>tr|E7EQ34|E7EQ34_HUMAN Golgi SNAP receptor complex member 2 OS=Homo sapiens GN=GOSR2 PE=1 SV=2;>sp|O14653-2|GOSR2_HUMAN Isoform B of Golgi SNAP receptor complex member 2 OS=Homo sapiens GN=GOSR2;>sp|O14653|GOSR2_HUMAN Golgi SNAP receptor complex member 2	MULTI-SECPEP		JACB153_1	MDA-MB-231 R10K8	648.68	2	643.814	1285.61	43812.6	-0.57159	-5.0677	-5.6393	643.81	648.318	47.582	19.857	0.58249	47.582	47.232	47.814	0		0	0	0	0.08315	1	16223	20.942	17.571	1	1.9767	0.085732	0
AANATTNPSQLLPLELVDK	19	1	0	Acetyl (Protein N-term)	_(ac)AANATTNPSQLLPLELVDK_			1	0	Q9Y4Y9;B8ZZF8	Q9Y4Y9	Q9Y4Y9	LSM5	U6 snRNA-associated Sm-like protein LSm5	>sp|Q9Y4Y9|LSM5_HUMAN U6 snRNA-associated Sm-like protein LSm5 OS=Homo sapiens GN=LSM5 PE=1 SV=3;>tr|B8ZZF8|B8ZZF8_HUMAN U6 snRNA-associated Sm-like protein LSm5 OS=Homo sapiens GN=LSM5 PE=1 SV=1	MULTI-MSMS		JACB153_1	MDA-MB-231 R10K8	682.71	3	679.7	2036.08	43230.9	-0.44982	0.22347	-0.22635	679.7	682.372	81.251	31.084	0.74846	81.251	80.92	81.669	0		0	0	0	0.099827	1	28366	36.481	36.481	1	1.9811	0.081264	0
DREEALHQFR	10	0	2	Unmodified	_DREEALHQFR_			0	0	O00571;O00571-2;O15523;B4DXX7	O00571	O00571	DDX3X;DDX3Y	ATP-dependent RNA helicase DDX3X;ATP-dependent RNA helicase DDX3Y	>sp|O00571|DDX3X_HUMAN ATP-dependent RNA helicase DDX3X OS=Homo sapiens GN=DDX3X PE=1 SV=3;>sp|O00571-2|DDX3X_HUMAN Isoform 2 of ATP-dependent RNA helicase DDX3X OS=Homo sapiens GN=DDX3X;>sp|O15523|DDX3Y_HUMAN ATP-dependent RNA helicase DDX3Y OS=Homo sapie	MULTI-MSMS		JACB153_1	MDA-MB-231 R10K8	440.89	3	434.218	1299.63	51676.8	0.02568	0.54666	0.57234	434.219	440.89	18.396	10.129	0.45602	18.396	18.167	18.623	0		0	0	0	0.0027037	1	4686	103.22	103.22	1	2.0422	2.1872	0
NGFVVLK	7	1	0	Unmodified	_NGFVVLK_			0	0	P63241-2;P63241;I3L504;I3L397;Q6IS14;Q9GZV4;C9J4W5;C9J7B5;F8WCJ1	P63241-2	P63241-2	EIF5A;EIF5AL1;EIF5A2	Eukaryotic translation initiation factor 5A-1;Eukaryotic translation initiation factor 5A-1-like;Eukaryotic translation initiation factor 5A-2	>sp|P63241-2|IF5A1_HUMAN Isoform 2 of Eukaryotic translation initiation factor 5A-1 OS=Homo sapiens GN=EIF5A;>sp|P63241|IF5A1_HUMAN Eukaryotic translation initiation factor 5A-1 OS=Homo sapiens GN=EIF5A PE=1 SV=2;>tr|I3L504|I3L504_HUMAN Eukaryotic translat	MULTI-MSMS		JACB153_1	MDA-MB-231 R10K8	392.74	2	388.737	775.459	56314.1	-0.50261	1.0714	0.56876	388.737	392.744	34.286	15.425	0.59678	34.286	34.048	34.645	0		0	0	0	0.03191	1	10956	58.194	58.194	1	2.1223	0.075101	0
YLTVAAIFR	9	0	1	Unmodified	_YLTVAAIFR_			0	0	Q13885;Q9BVA1	Q13885;Q9BVA1	Q9BVA1	TUBB2A;TUBB2B	Tubulin beta-2A chain;Tubulin beta-2B chain	>sp|Q13885|TBB2A_HUMAN Tubulin beta-2A chain OS=Homo sapiens GN=TUBB2A PE=1 SV=1;>sp|Q9BVA1|TBB2B_HUMAN Tubulin beta-2B chain OS=Homo sapiens GN=TUBB2B PE=1 SV=1	MULTI-MSMS		JACB153_1	MDA-MB-231 R10K8	532.31	2	527.308	1052.6	49862.8	0.12748	-0.65491	-0.52743	527.807	532.313	58.149	23.38	0.36572	58.149	57.93	58.296	0		0	0	0	0.003178	1	20124	86.67	42.275	1	2.3698	0.30766	0
IQIAPDSGGLPER	13	0	1	Unmodified	_IQIAPDSGGLPER_			0	0	B4DT31;E9PEB5;Q96AE4-2;Q96AE4;C9JSZ1	B4DT31	B4DT31	FUBP1	Far upstream element-binding protein 1	>tr|B4DT31|B4DT31_HUMAN Far upstream element-binding protein 1 OS=Homo sapiens GN=FUBP1 PE=1 SV=1;>tr|E9PEB5|E9PEB5_HUMAN Far upstream element-binding protein 1 OS=Homo sapiens GN=FUBP1 PE=1 SV=1;>sp|Q96AE4-2|FUBP1_HUMAN Isoform 2 of Far upstream element-b	MULTI-MSMS		JACB153_1	MDA-MB-231 R10K8	681.87	2	676.862	1351.71	42678	-0.55291	0.9967	0.44379	677.365	681.867	37.247	16.418	0.3094	37.247	37.11	37.419	0		0	0	0	0.0042702	1	12133	82.908	82.908	1	2.4497	0.31803	0
FLFDSVSSQNVGLR	14	0	1	Unmodified	_FLFDSVSSQNVGLR_			0	0	O00410-3;O00410;H0Y8C6;O00410-2;E7ETV3;C9JMV5;H0Y3V4	O00410-3	O00410-3	IPO5	Importin-5	>sp|O00410-3|IPO5_HUMAN Isoform 3 of Importin-5 OS=Homo sapiens GN=IPO5;>sp|O00410|IPO5_HUMAN Importin-5 OS=Homo sapiens GN=IPO5 PE=1 SV=4;>tr|H0Y8C6|H0Y8C6_HUMAN Importin-5 (Fragment) OS=Homo sapiens GN=IPO5 PE=1 SV=1;>sp|O00410-2|IPO5_HUMAN Isoform 2 of	MULTI-MSMS		JACB153_1	MDA-MB-231 R10K8	789.91	2	784.907	1567.8	37163.1	-0.9565	0.393	-0.5635	784.907	789.911	57.766	23.252	0.64178	57.766	57.471	58.113	0		0	0	0	4.5138e-07	1	19975	158.2	127.87	1	2.4815	0.32216	0
LQDTYNLDTDTISK	14	1	0	Unmodified	_LQDTYNLDTDTISK_			0	0	P13674;P13674-2;P13674-3	P13674	P13674	P4HA1	Prolyl 4-hydroxylase subunit alpha-1	>sp|P13674|P4HA1_HUMAN Prolyl 4-hydroxylase subunit alpha-1 OS=Homo sapiens GN=P4HA1 PE=1 SV=2;>sp|P13674-2|P4HA1_HUMAN Isoform 2 of Prolyl 4-hydroxylase subunit alpha-1 OS=Homo sapiens GN=P4HA1;>sp|P13674-3|P4HA1_HUMAN Isoform 3 of Prolyl 4-hydroxylase su	MULTI-MSMS		JACB153_1	MDA-MB-231 R10K8	817.9	2	813.896	1625.78	38844	-0.89041	0.075729	-0.81469	814.398	817.904	39.329	17.114	0.30522	39.329	39.158	39.463	0		0	0	0	4.5089e-05	1	12984	110.77	92.044	1	2.493	0.09904	0
NNLCPSGSNIISNLFK	16	1	0	Unmodified	_NNLCPSGSNIISNLFK_			0	0	A6NMH8;E9PIF1;P60033;H0YDJ9;H0YDL9;E9PRJ8;E9PJK1	A6NMH8	A6NMH8	CD81	CD81 antigen	>tr|A6NMH8|A6NMH8_HUMAN CD81 antigen OS=Homo sapiens GN=CD81 PE=1 SV=1;>tr|E9PIF1|E9PIF1_HUMAN CD81 antigen OS=Homo sapiens GN=CD81 PE=1 SV=1;>sp|P60033|CD81_HUMAN CD81 antigen OS=Homo sapiens GN=CD81 PE=1 SV=1;>tr|H0YDJ9|H0YDJ9_HUMAN CD81 antigen (Fragmen	MULTI-MSMS		JACB153_1	MDA-MB-231 R10K8	893.96	2	889.449	1776.88	37621.8	-0.45917	1.2619	0.80269	889.455	893.457	64.081	25.361	0.53871	64.081	63.808	64.347	0		0	0	0	1.2205e-05	1	22255	98.676	88.209	1	2.5483	0.099242	0
IYWGTATTGK	10	1	0	Unmodified	_IYWGTATTGK_			0	0	P54577	P54577	P54577	YARS	Tyrosine--tRNA ligase, cytoplasmic	>sp|P54577|SYYC_HUMAN Tyrosine--tRNA ligase, cytoplasmic OS=Homo sapiens GN=YARS PE=1 SV=4	MULTI-SECPEP		JACB153_1	MDA-MB-231 R10K8	552.77	2	549.285	1096.56	45768.5	0.26869	2.1719	2.4405	549.286	553.294	32.419	14.804	0.30394	32.419	32.234	32.538	0		0	0	0	0.064646	1	10177	45.077	39.266	1	2.5675	0.11524	0
KEELTLEGIR	10	1	1	Unmodified	_KEELTLEGIR_			0	0	P60842;P60842-2;J3KT12;J3QS69;J3KTB5;J3KSZ0;J3KTN0	P60842	P60842	EIF4A1	Eukaryotic initiation factor 4A-I	>sp|P60842|IF4A1_HUMAN Eukaryotic initiation factor 4A-I OS=Homo sapiens GN=EIF4A1 PE=1 SV=1;>sp|P60842-2|IF4A1_HUMAN Isoform 2 of Eukaryotic initiation factor 4A-I OS=Homo sapiens GN=EIF4A1;>tr|J3KT12|J3KT12_HUMAN Eukaryotic initiation factor 4A-I OS=Homo	MULTI-MSMS		JACB153_1	MDA-MB-231 R10K8	603.35	2	594.335	1186.66	45831.5	-0.29533	0.20331	-0.092019	594.336	603.347	31.298	14.433	0.54641	31.298	31.022	31.569	-1.9073e-06		0	0	0	0.00098538	1	9711	104.82	79.97	1	2.6036	3.837	0
TLPQLPNEEK	10	1	0	Unmodified	_TLPQLPNEEK_			0	0	Q5SW79;H0Y2V6;Q5SW79-3;Q5SW79-2	Q5SW79	Q5SW79	CEP170	Centrosomal protein of 170 kDa	>sp|Q5SW79|CE170_HUMAN Centrosomal protein of 170 kDa OS=Homo sapiens GN=CEP170 PE=1 SV=1;>tr|H0Y2V6|H0Y2V6_HUMAN Centrosomal protein of 170 kDa (Fragment) OS=Homo sapiens GN=CEP170 PE=1 SV=1;>sp|Q5SW79-3|CE170_HUMAN Isoform 3 of Centrosomal protein of 170	MULTI-MSMS		JACB153_1	MDA-MB-231 R10K8	588.82	2	584.814	1167.61	47123.1	0.1254	1.7945	1.9199	584.814	589.324	32.687	14.895	0.3365	32.687	32.512	32.849	0		0	0	0	0.017011	1	10323	61.353	26.633	1	2.6986	0.1201	0
GVMLAVDAVIAELK	14	1	0	Unmodified	_GVMLAVDAVIAELK_			0	0	P10809;E7ESH4;E7EXB4	P10809	P10809	HSPD1	60 kDa heat shock protein, mitochondrial	>sp|P10809|CH60_HUMAN 60 kDa heat shock protein, mitochondrial OS=Homo sapiens GN=HSPD1 PE=1 SV=2;>tr|E7ESH4|E7ESH4_HUMAN 60 kDa heat shock protein, mitochondrial (Fragment) OS=Homo sapiens GN=HSPD1 PE=1 SV=1;>tr|E7EXB4|E7EXB4_HUMAN 60 kDa heat shock prote	MULTI-MSMS		JACB153_1	MDA-MB-231 R10K8	718.92	2	714.91	1427.81	42600.3	-0.056655	-1.7755	-1.8322	714.908	718.916	80.084	30.698	0.53999	80.084	79.842	80.382	0		0	0	0	0.006133	1	27998	65.092	58.471	1	2.7262	0.13207	0
IHYLDTTTLIEPVSR	15	0	1	Unmodified	_IHYLDTTTLIEPVSR_			0	0	P46108;P46108-2;I3L297	P46108	P46108	CRK	Adapter molecule crk	>sp|P46108|CRK_HUMAN Adapter molecule crk OS=Homo sapiens GN=CRK PE=1 SV=2;>sp|P46108-2|CRK_HUMAN Isoform Crk-I of Adapter molecule crk OS=Homo sapiens GN=CRK;>tr|I3L297|I3L297_HUMAN Adapter molecule crk OS=Homo sapiens GN=CRK PE=1 SV=1	MULTI-MSMS		JACB153_1	MDA-MB-231 R10K8	590.32	3	586.653	1756.94	46155.8	-0.13836	1.8672	1.7289	586.656	589.989	47.821	19.943	0.43665	47.821	47.634	48.07	0		0	0	0	0.12611	1	16324	41.014	31.092	1	2.7303	0.35446	0
LSCLPAFK	8	1	0	Unmodified	_LSCLPAFK_			0	0	Q14204	Q14204	Q14204	DYNC1H1	Cytoplasmic dynein 1 heavy chain 1	>sp|Q14204|DYHC1_HUMAN Cytoplasmic dynein 1 heavy chain 1 OS=Homo sapiens GN=DYNC1H1 PE=1 SV=5	MULTI-MSMS		JACB153_1	MDA-MB-231 R10K8	472.26	2	468.255	934.495	50422.6	0.25022	2.8636	3.1138	468.256	472.263	38.784	16.925	0.51727	38.784	38.471	38.988	0		0	0	0	0.0055593	1	12779	84.568	63.12	1	2.8352	0.10673	0
SFPVNSDVGVLK	12	1	0	Unmodified	_SFPVNSDVGVLK_			0	0	B0YIW6;P48444;P48444-2	B0YIW6	B0YIW6	ARCN1	Coatomer subunit delta	>tr|B0YIW6|B0YIW6_HUMAN Archain 1, isoform CRA_a OS=Homo sapiens GN=ARCN1 PE=1 SV=1;>sp|P48444|COPD_HUMAN Coatomer subunit delta OS=Homo sapiens GN=ARCN1 PE=1 SV=1;>sp|P48444-2|COPD_HUMAN Isoform 2 of Coatomer subunit delta OS=Homo sapiens GN=ARCN1	MULTI-MSMS		JACB153_1	MDA-MB-231 R10K8	635.35	2	631.343	1260.67	43371	-0.41749	-0.41963	-0.83712	631.342	635.351	44.142	18.715	0.64268	44.142	43.783	44.426	0		0	0	0	0.011453	1	14829	73.435	65.711	1	2.893	0.10174	0
AALSEEELEKK	11	2	0	Unmodified	_AALSEEELEKK_			0	0	Q04637-9;Q04637-8;Q04637;E7EUU4;Q04637-3;E9PGM1;Q04637-4;E7EX73;Q04637-5;Q04637-7;Q04637-6	Q04637-9	Q04637-9	EIF4G1	Eukaryotic translation initiation factor 4 gamma 1	>sp|Q04637-9|IF4G1_HUMAN Isoform 9 of Eukaryotic translation initiation factor 4 gamma 1 OS=Homo sapiens GN=EIF4G1;>sp|Q04637-8|IF4G1_HUMAN Isoform 8 of Eukaryotic translation initiation factor 4 gamma 1 OS=Homo sapiens GN=EIF4G1;>sp|Q04637|IF4G1_HUMAN Euk	MULTI-MSMS		JACB153_1	MDA-MB-231 R10K8	421.57	3	416.222	1245.65	54006.2	-0.058077	-0.61886	-0.67694	416.556	421.565	20.297	10.765	0.4132	20.297	20.072	20.485	0		0	0	0	0.00069763	1	5379	94.465	76.329	1	2.9154	3.1592	0
QPSQGPTFGIK	11	1	0	Unmodified	_QPSQGPTFGIK_			0	0	P11586;F5H2F4	P11586	P11586	MTHFD1	C-1-tetrahydrofolate synthase, cytoplasmic;Methylenetetrahydrofolate dehydrogenase;Methenyltetrahydrofolate cyclohydrolase;Formyltetrahydrofolate synthetase	>sp|P11586|C1TC_HUMAN C-1-tetrahydrofolate synthase, cytoplasmic OS=Homo sapiens GN=MTHFD1 PE=1 SV=3;>tr|F5H2F4|F5H2F4_HUMAN C-1-tetrahydrofolate synthase, cytoplasmic OS=Homo sapiens GN=MTHFD1 PE=1 SV=1	MULTI-MSMS		JACB153_1	MDA-MB-231 R10K8	584.32	2	580.309	1158.6	46539.6	0.044296	-1.4093	-1.365	580.308	584.315	30.326	14.112	0.42287	30.326	30.047	30.47	1.9073e-06		0	0	0	0.0056145	1	9318	82.489	57.634	1	3.0344	0.10492	0
NNNIDAAIENIENMLTSENK	20	1	0	Unmodified	_NNNIDAAIENIENMLTSENK_			0	0	P42704	P42704	P42704	LRPPRC	Leucine-rich PPR motif-containing protein, mitochondrial	>sp|P42704|LPPRC_HUMAN Leucine-rich PPR motif-containing protein, mitochondrial OS=Homo sapiens GN=LRPPRC PE=1 SV=3	MULTI-MSMS		JACB153_1	MDA-MB-231 R10K8	1128.54	2	1124.03	2246.05	33405.2	-0.38072	-0.93391	-1.3146	1124.03	1128.54	85.125	32.375	0.61623	85.125	84.833	85.45	-7.6294e-06		0	0	0	0.001396	1	29726	68.567	68.567	1	3.0359	0.14684	0
NNNIDAAIENIENMLTSENK	20	1	0	Unmodified	_NNNIDAAIENIENMLTSENK_			0	0	P42704	P42704	P42704	LRPPRC	Leucine-rich PPR motif-containing protein, mitochondrial	>sp|P42704|LPPRC_HUMAN Leucine-rich PPR motif-containing protein, mitochondrial OS=Homo sapiens GN=LRPPRC PE=1 SV=3	MULTI-MSMS		JACB153_1	MDA-MB-231 R10K8	752.69	3	749.69	2246.05	40650.3	-0.32589	0.036399	-0.28949	749.691	752.696	85.12	32.375	0.57315	85.12	84.851	85.424	0		0	0	0	0.095197	1	29700	44.238	44.238	1	3.0529	0.14276	0
EVGEHVVSVR	10	0	1	Unmodified	_EVGEHVVSVR_			0	0	Q14315;Q14315-2	Q14315	Q14315	FLNC	Filamin-C	>sp|Q14315|FLNC_HUMAN Filamin-C OS=Homo sapiens GN=FLNC PE=1 SV=3;>sp|Q14315-2|FLNC_HUMAN Isoform 2 of Filamin-C OS=Homo sapiens GN=FLNC	MULTI-MSMS		JACB153_1	MDA-MB-231 R10K8	560.8	2	555.799	1109.58	47812.9	0.26896	-0.48925	-0.22029	555.797	560.803	18.8	10.269	0.43967	18.8	18.651	19.091	0		0	0	0	0.0076462	1	4824	72.006	72.006	1	3.0982	0.40222	0
ALASQLQDSLK	11	1	0	Unmodified	_ALASQLQDSLK_			0	0	P18206;P18206-2;Q5JQ13	P18206	P18206	VCL	Vinculin	>sp|P18206|VINC_HUMAN Vinculin OS=Homo sapiens GN=VCL PE=1 SV=4;>sp|P18206-2|VINC_HUMAN Isoform 1 of Vinculin OS=Homo sapiens GN=VCL;>tr|Q5JQ13|Q5JQ13_HUMAN Vinculin (Fragment) OS=Homo sapiens GN=VCL PE=1 SV=1	MULTI-MSMS		JACB153_1	MDA-MB-231 R10K8	591.33	2	587.327	1172.64	45502.9	-0.51051	0.81286	0.30235	587.328	591.335	36.603	16.201	0.79963	36.603	36.06	36.859	-3.8147e-06		0	0	0	0.0024648	1	11938	89.9	89.9	1	3.1241	0.06685	0
VDSLLENLEK	10	1	0	Unmodified	_VDSLLENLEK_			0	0	P07910-2;G3V4C1;B4DY08;G3V4W0;P07910;G3V2Q1;G3V576;P07910-4;P07910-3;G3V2D6;G3V5V7;O60812	P07910-2	P07910-2	HNRNPC;HNRNPCL1	Heterogeneous nuclear ribonucleoproteins C1/C2;Heterogeneous nuclear ribonucleoprotein C-like 1	>sp|P07910-2|HNRPC_HUMAN Isoform C1 of Heterogeneous nuclear ribonucleoproteins C1/C2 OS=Homo sapiens GN=HNRNPC;>tr|G3V4C1|G3V4C1_HUMAN Heterogeneous nuclear ribonucleoproteins C1/C2 OS=Homo sapiens GN=HNRNPC PE=1 SV=1;>tr|B4DY08|B4DY08_HUMAN Heterogeneous	MULTI-MSMS		JACB153_1	MDA-MB-231 R10K8	584.32	2	580.314	1158.61	45521.5	0.13742	0.17635	0.31377	580.314	584.321	48.182	20.058	0.95648	48.182	47.757	48.713	3.8147e-06		0	0	0	0.0009518	1	16403	115.57	56.032	1	3.1637	0.075934	0
AGVAAPATQVAQVTLQSVQR	20	0	1	Unmodified	_AGVAAPATQVAQVTLQSVQR_			0	0	Q15149-4;Q15149;Q15149-2;Q15149-6;Q15149-5;Q15149-9;Q15149-8;Q15149-7;Q15149-3;E9PMV1	Q15149-4	Q15149-4	PLEC	Plectin	>sp|Q15149-4|PLEC_HUMAN Isoform 4 of Plectin OS=Homo sapiens GN=PLEC;>sp|Q15149|PLEC_HUMAN Plectin OS=Homo sapiens GN=PLEC PE=1 SV=3;>sp|Q15149-2|PLEC_HUMAN Isoform 2 of Plectin OS=Homo sapiens GN=PLEC;>sp|Q15149-6|PLEC_HUMAN Isoform 6 of Plectin OS=Homo s	MULTI-MSMS		JACB153_1	MDA-MB-231 R10K8	669.38	3	665.704	1994.09	44010.2	-0.45729	2.5172	2.0599	666.375	669.377	51.443	21.151	0.29937	51.443	51.305	51.604	0		0	0	0	3.5994e-07	1	17638	103.41	103.41	1	3.2743	0.42508	0
KFLEHLSGAGK	11	2	0	Unmodified	_KFLEHLSGAGK_			0	0	Q01813	Q01813	Q01813	PFKP	6-phosphofructokinase type C	>sp|Q01813|K6PP_HUMAN 6-phosphofructokinase type C OS=Homo sapiens GN=PFKP PE=1 SV=2	MULTI-MSMS		JACB153_1	MDA-MB-231 R10K8	401.57	3	396.224	1185.65	54562.9	-0.32146	0.65202	0.33057	396.558	401.567	17.803	9.9345	0.44651	17.803	17.591	18.037	0		0	0	0	0.012547	1	4476	62.924	62.924	1	3.3735	3.6556	0
LYHDIAQQAFK	11	1	0	Unmodified	_LYHDIAQQAFK_			0	0	Q14152;F5H335	Q14152	Q14152	EIF3A	Eukaryotic translation initiation factor 3 subunit A	>sp|Q14152|EIF3A_HUMAN Eukaryotic translation initiation factor 3 subunit A OS=Homo sapiens GN=EIF3A PE=1 SV=1;>tr|F5H335|F5H335_HUMAN Eukaryotic translation initiation factor 3 subunit A OS=Homo sapiens GN=EIF3A PE=1 SV=1	MULTI-MSMS		JACB153_1	MDA-MB-231 R10K8	447.91	3	445.235	1332.68	53004.1	-0.22629	0.67595	0.44965	445.235	447.906	29.187	13.73	0.46154	29.187	28.945	29.407	0		0	0	0	0.012929	1	8910	65.278	56.548	1	3.7465	0.12173	0
KWMEQFEMAMSNIK	14	2	0	3 Oxidation (M)	_KWM(ox)EQFEM(ox)AM(ox)SNIK_	KWM(1)EQFEM(1)AM(1)SNIK	KWM(2.66)EQFEM(2.66)AM(2.66)SNIK	0	3	P52735;P52735-2;P52735-3	P52735	P52735	VAV2	Guanine nucleotide exchange factor VAV2	>sp|P52735|VAV2_HUMAN Guanine nucleotide exchange factor VAV2 OS=Homo sapiens GN=VAV2 PE=1 SV=2;>sp|P52735-2|VAV2_HUMAN Isoform 2 of Guanine nucleotide exchange factor VAV2 OS=Homo sapiens GN=VAV2;>sp|P52735-3|VAV2_HUMAN Isoform 3 of Guanine nucleotide exc	MULTI-MSMS		JACB153_1	MDA-MB-231 R10K8	918.92	2	910.904	1819.79	36684	-0.89516	-0.2748	-1.17	910.906	918.919	47.892	19.962	0.46824	47.892	47.691	48.159	3.8147e-06		0	0	0	0.13904	1	16298	2.6598	0.35706	1	3.8832	4.2079	0
TVQSLEIDLDSMR	13	0	1	Unmodified	_TVQSLEIDLDSMR_			0	0	P05783;F8VZY9;CON__H-INV:HIT000015463	P05783	P05783	KRT18	Keratin, type I cytoskeletal 18	>sp|P05783|K1C18_HUMAN Keratin, type I cytoskeletal 18 OS=Homo sapiens GN=KRT18 PE=1 SV=2;>tr|F8VZY9|F8VZY9_HUMAN Keratin, type I cytoskeletal 18 OS=Homo sapiens GN=KRT18 PE=1 SV=1;>H-INV:HIT000015463 Tax_Id=9606 Gene_Symbol=PTPN14 Similar to Keratin 18	MULTI-MSMS		JACB153_1	MDA-MB-231 R10K8	506.26	3	502.92	1505.74	48395.2	0.17187	-2.0861	-1.9142	503.254	506.257	55.268	22.423	0.78929	55.268	54.927	55.716	0		0	0	0	5.9163e-05	1	19071	128.54	116.12	1	3.8941	0.50555	0
FVEGLPINDFSR	12	0	1	Unmodified	_FVEGLPINDFSR_			0	0	P40925-3;P40925;P40925-2;B9A041;B8ZZ51	P40925-3	P40925-3	MDH1	Malate dehydrogenase, cytoplasmic	>sp|P40925-3|MDHC_HUMAN Isoform 3 of Malate dehydrogenase, cytoplasmic OS=Homo sapiens GN=MDH1;>sp|P40925|MDHC_HUMAN Malate dehydrogenase, cytoplasmic OS=Homo sapiens GN=MDH1 PE=1 SV=4;>sp|P40925-2|MDHC_HUMAN Isoform 2 of Malate dehydrogenase, cytoplasmic	MULTI-MSMS		JACB153_1	MDA-MB-231 R10K8	702.36	2	697.359	1392.7	41335.1	-0.22789	0.075973	-0.15192	697.362	702.363	55.593	22.528	0.46774	55.593	55.368	55.835	-3.8147e-06		0	0	0	0.0002775	1	19169	104.24	88.304	1	3.9622	0.51439	0
ITGMLLEIDNSELLHMLESPESLR	24	0	1	Unmodified	_ITGMLLEIDNSELLHMLESPESLR_			0	0	Q13310-3;Q13310;Q13310-2;B1ANR0;H0Y5F5;H0Y6X6;H0YER0;P11940;P11940-2;E7ERJ7;E7EQV3;H0YB75;H0YAS6;H0YAS7	Q13310-3;P11940	P11940	PABPC4;PABPC1	Polyadenylate-binding protein 4;Polyadenylate-binding protein 1	>sp|Q13310-3|PABP4_HUMAN Isoform 3 of Polyadenylate-binding protein 4 OS=Homo sapiens GN=PABPC4;>sp|Q13310|PABP4_HUMAN Polyadenylate-binding protein 4 OS=Homo sapiens GN=PABPC4 PE=1 SV=1;>sp|Q13310-2|PABP4_HUMAN Isoform 2 of Polyadenylate-binding protein 4	MULTI-MSMS		JACB153_1	MDA-MB-231 R10K8	917.8	3	914.135	2739.38	36444	-0.61296	0.1089	-0.50407	915.471	917.805	83.584	31.864	0.62877	83.584	83.22	83.849	7.6294e-06		0	0	0	5.6569e-12	1	29159	146.99	146.99	1	4.1076	0.53326	0
YKDLDEDELLGNLSETELK	19	2	0	Unmodified	_YKDLDEDELLGNLSETELK_			0	0	Q9NYL9;H0YNU8	Q9NYL9	Q9NYL9	TMOD3	Tropomodulin-3	>sp|Q9NYL9|TMOD3_HUMAN Tropomodulin-3 OS=Homo sapiens GN=TMOD3 PE=1 SV=1;>tr|H0YNU8|H0YNU8_HUMAN Tropomodulin-3 (Fragment) OS=Homo sapiens GN=TMOD3 PE=1 SV=1	MULTI-MSMS		JACB153_1	MDA-MB-231 R10K8	747.71	3	742.034	2223.08	40172.8	-0.33671	-1.2288	-1.5656	742.031	747.376	55.657	22.548	0.47832	55.657	55.433	55.911	0		0	0	0	0.068079	1	19260	57.496	57.496	1	4.3308	4.693	0
LILDSAR	7	0	1	Unmodified	_LILDSAR_			0	0	P29401-2;P29401;B4E022	P29401-2	P29401-2	TKT	Transketolase	>sp|P29401-2|TKT_HUMAN Isoform 2 of Transketolase OS=Homo sapiens GN=TKT;>sp|P29401|TKT_HUMAN Transketolase OS=Homo sapiens GN=TKT PE=1 SV=3;>tr|B4E022|B4E022_HUMAN Transketolase OS=Homo sapiens GN=TKT PE=1 SV=1	MULTI-MSMS		JACB153_1	MDA-MB-231 R10K8	399.24	2	394.237	786.46	54824.8	-0.33079	0.13221	-0.19858	394.239	399.242	28.179	13.395	0.49399	28.179	27.946	28.44	0		0	0	0	0.07703	1	8490	41.979	5.7938	1	4.4053	0.57191	0
AAQVAQDEEIAR	12	0	1	Unmodified	_AAQVAQDEEIAR_			0	0	Q8IVM0-2;Q8IVM0	Q8IVM0-2	Q8IVM0-2	CCDC50	Coiled-coil domain-containing protein 50	>sp|Q8IVM0-2|CCD50_HUMAN Isoform 2 of Coiled-coil domain-containing protein 50 OS=Homo sapiens GN=CCDC50;>sp|Q8IVM0|CCD50_HUMAN Coiled-coil domain-containing protein 50 OS=Homo sapiens GN=CCDC50 PE=1 SV=1	MULTI-MSMS		JACB153_1	MDA-MB-231 R10K8	655.83	2	650.828	1299.64	43948.3	-0.49856	-0.10782	-0.60638	650.829	655.833	21.454	11.156	0.30678	21.454	21.311	21.618	0		0	0	0	0.00023355	1	5843	110.08	91.452	1	4.5018	0.58444	0
FGAVFLWDSGSSVGEITGHNK	21	1	0	Unmodified	_FGAVFLWDSGSSVGEITGHNK_			0	0	O75083;D6RD66	O75083	O75083	WDR1	WD repeat-containing protein 1	>sp|O75083|WDR1_HUMAN WD repeat-containing protein 1 OS=Homo sapiens GN=WDR1 PE=1 SV=4;>tr|D6RD66|D6RD66_HUMAN WD repeat-containing protein 1 (Fragment) OS=Homo sapiens GN=WDR1 PE=1 SV=1	MULTI-MSMS		JACB153_1	MDA-MB-231 R10K8	739.7	3	736.696	2207.06	41446.1	-0.062984	-0.79498	-0.85796	737.029	739.367	59.534	23.847	0.7201	59.534	59.171	59.891	-3.8147e-06		0	0	0	1.5826e-07	1	20686	117.74	117.74	1	4.5613	0.16001	0
ILEEPHPLMFQK	12	1	0	Unmodified	_ILEEPHPLMFQK_			0	0	O43665-3;O43665;O43665-2	O43665-3	O43665-3	RGS10	Regulator of G-protein signaling 10	>sp|O43665-3|RGS10_HUMAN Isoform 3 of Regulator of G-protein signaling 10 OS=Homo sapiens GN=RGS10;>sp|O43665|RGS10_HUMAN Regulator of G-protein signaling 10 OS=Homo sapiens GN=RGS10 PE=1 SV=2;>sp|O43665-2|RGS10_HUMAN Isoform 2 of Regulator of G-protein si	MULTI-MSMS		JACB153_1	MDA-MB-231 R10K8	497.27	3	494.599	1480.77	49944.4	0.027254	0.031351	0.058605	495.267	497.271	40.191	17.395	0.51789	40.191	39.938	40.456	0		0	0	0	0.026902	1	13290	60.691	60.691	1	4.5693	0.1856	0
AANATTNPSQLLPLELVDK	19	1	0	Acetyl (Protein N-term)	_(ac)AANATTNPSQLLPLELVDK_			1	0	Q9Y4Y9;B8ZZF8	Q9Y4Y9	Q9Y4Y9	LSM5	U6 snRNA-associated Sm-like protein LSm5	>sp|Q9Y4Y9|LSM5_HUMAN U6 snRNA-associated Sm-like protein LSm5 OS=Homo sapiens GN=LSM5 PE=1 SV=3;>tr|B8ZZF8|B8ZZF8_HUMAN U6 snRNA-associated Sm-like protein LSm5 OS=Homo sapiens GN=LSM5 PE=1 SV=1	MULTI-MSMS		JACB153_1	MDA-MB-231 R10K8	1023.05	2	1019.05	2036.08	35191.3	-0.53671	0.087243	-0.44947	1019.05	1023.56	81.265	31.086	0.42347	81.265	81.024	81.447	0		0	0	0	0.0011145	1	28384	67.579	67.579	1	4.6076	0.1682	0
IASLEVENQSLR	12	0	1	Unmodified	_IASLEVENQSLR_			0	0	P29692-3;E9PL71;E9PN91;E9PRY8;P29692-2;P29692;E9PK01;E9PI39;E9PQ49;E9PL12;E9PPR1;H0YCK7;E9PIZ1;E9PMW7	P29692-3;E9PRY8	E9PRY8	EEF1D	Elongation factor 1-delta	>sp|P29692-3|EF1D_HUMAN Isoform 3 of Elongation factor 1-delta OS=Homo sapiens GN=EEF1D;>tr|E9PL71|E9PL71_HUMAN Elongation factor 1-delta (Fragment) OS=Homo sapiens GN=EEF1D PE=1 SV=1;>tr|E9PN91|E9PN91_HUMAN Elongation factor 1-delta OS=Homo sapiens GN=EEF	MULTI-MSMS		JACB153_1	MDA-MB-231 R10K8	684.87	2	679.867	1357.72	42866.4	-0.70595	-0.080886	-0.78684	680.367	684.872	35.947	15.983	0.644	35.947	35.69	36.334	0		0	0	0	6.6745e-05	2	11574	139.46	26.239	1	4.8155	0.62516	0
KPVVGQCTIER	11	1	1	Unmodified	_KPVVGQCTIER_			0	0	F8W8J4;Q9NZM1;Q9NZM1-6;C9JCN0;Q9NZM1-3;Q9NZM1-2;H0YD14	F8W8J4	F8W8J4	MYOF	Myoferlin	>tr|F8W8J4|F8W8J4_HUMAN Myoferlin OS=Homo sapiens GN=MYOF PE=1 SV=1;>sp|Q9NZM1|MYOF_HUMAN Myoferlin OS=Homo sapiens GN=MYOF PE=1 SV=1;>sp|Q9NZM1-6|MYOF_HUMAN Isoform 6 of Myoferlin OS=Homo sapiens GN=MYOF;>tr|C9JCN0|C9JCN0_HUMAN Myoferlin OS=Homo sapiens G	MULTI-MSMS		JACB153_1	MDA-MB-231 R10K8	435.58	3	429.568	1285.68	52379	-0.52407	0.29362	-0.23044	429.904	435.575	17.209	9.7414	0.39976	17.209	16.987	17.387	1.9073e-06		0	0	0	0.0096511	1	4234	70.488	70.488	1	5.0159	7.392	0
LLDTVDDMLANDIAR	15	0	1	Unmodified	_LLDTVDDMLANDIAR_			0	0	Q9H4M9;C9J2Z4	Q9H4M9	Q9H4M9	EHD1	EH domain-containing protein 1	>sp|Q9H4M9|EHD1_HUMAN EH domain-containing protein 1 OS=Homo sapiens GN=EHD1 PE=1 SV=2;>tr|C9J2Z4|C9J2Z4_HUMAN EH domain-containing protein 1 (Fragment) OS=Homo sapiens GN=EHD1 PE=1 SV=1	MULTI-MSMS		JACB153_1	MDA-MB-231 R10K8	842.93	2	837.922	1673.83	38332.6	-0.26018	-0.66912	-0.9293	838.42	842.926	64.905	25.634	0.46042	64.905	64.683	65.144	0		0	0	0	5.5372e-09	1	22553	169.04	169.04	1	5.3673	0.6968	0
GPEVDVSGPK	10	1	0	Unmodified	_GPEVDVSGPK_			0	0	Q09666	Q09666	Q09666	AHNAK	Neuroblast differentiation-associated protein AHNAK	>sp|Q09666|AHNK_HUMAN Neuroblast differentiation-associated protein AHNAK OS=Homo sapiens GN=AHNAK PE=1 SV=2	MULTI-MSMS		JACB153_1	MDA-MB-231 R10K8	496.76	2	492.753	983.492	50064.1	0.011232	0.90298	0.91421	492.752	496.761	21.963	11.321	0.54959	21.963	21.731	22.281	0		0	0	0	0.001098	1	5992	104.52	104.52	1	5.3891	0.20831	0
GDFLALDLGGTNFR	14	0	1	Unmodified	_GDFLALDLGGTNFR_			0	0	P52789;E9PB90;P52790	P52789	P52789	HK2;HK3	Hexokinase-2;Hexokinase-3	>sp|P52789|HXK2_HUMAN Hexokinase-2 OS=Homo sapiens GN=HK2 PE=1 SV=2;>tr|E9PB90|E9PB90_HUMAN Hexokinase-2 OS=Homo sapiens GN=HK2 PE=1 SV=1;>sp|P52790|HXK3_HUMAN Hexokinase-3 OS=Homo sapiens GN=HK3 PE=1 SV=2	MULTI-MSMS		JACB153_1	MDA-MB-231 R10K8	753.38	2	748.381	1494.75	41672	-0.36816	0.67505	0.30689	748.382	753.385	66.488	26.166	0.4937	66.488	66.285	66.779	0		0	0	0	0.0019944	1	23174	84.759	63.53	1	5.8441	0.7587	0
WDAWNELK	8	1	0	Unmodified	_WDAWNELK_			0	0	P07108;P07108-5;P07108-4;P07108-2;P07108-3	P07108	P07108	DBI	Acyl-CoA-binding protein	>sp|P07108|ACBP_HUMAN Acyl-CoA-binding protein OS=Homo sapiens GN=DBI PE=1 SV=2;>sp|P07108-5|ACBP_HUMAN Isoform 5 of Acyl-CoA-binding protein OS=Homo sapiens GN=DBI;>sp|P07108-4|ACBP_HUMAN Isoform 4 of Acyl-CoA-binding protein OS=Homo sapiens GN=DBI;>sp|P0	MULTI-MSMS		JACB153_1	MDA-MB-231 R10K8	535.26	2	531.256	1060.5	48089.2	0.47376	1.3916	1.8653	531.762	535.264	48.643	20.213	0.54517	48.643	48.347	48.892	0		0	0	0	0.010222	1	16557	69.716	69.716	1	5.8708	0.15673	0
DPQALSEHLK	10	1	0	Unmodified	_DPQALSEHLK_			0	0	P31948;G3XAD8;F5H0T1	P31948	P31948	STIP1	Stress-induced-phosphoprotein 1	>sp|P31948|STIP1_HUMAN Stress-induced-phosphoprotein 1 OS=Homo sapiens GN=STIP1 PE=1 SV=1;>tr|G3XAD8|G3XAD8_HUMAN Stress-induced-phosphoprotein 1 OS=Homo sapiens GN=STIP1 PE=1 SV=1;>tr|F5H0T1|F5H0T1_HUMAN Stress-induced-phosphoprotein 1 OS=Homo sapiens GN=	MULTI-SECPEP		JACB153_1	MDA-MB-231 R10K8	572.62	2	569.299	1136.58	46022.3	-0.13776	-1.2875	-1.4252	569.794	573.305	23.097	11.698	0.5671	23.097	22.9	23.467	-1.9073e-06		0	0	0	0.083585	1	6495	37.681	26.362	1	6.0988	0.17414	0
VDINAPDVEVQGK	13	1	0	Unmodified	_VDINAPDVEVQGK_			0	0	Q09666	Q09666	Q09666	AHNAK	Neuroblast differentiation-associated protein AHNAK	>sp|Q09666|AHNK_HUMAN Neuroblast differentiation-associated protein AHNAK OS=Homo sapiens GN=AHNAK PE=1 SV=2	MULTI-MSMS		JACB153_1	MDA-MB-231 R10K8	696.37	2	692.359	1382.7	40184	-0.90392	0.10827	-0.79564	692.359	696.366	36.55	16.183	0.55777	36.55	36.148	36.705	0		0	0	0	0.0028512	1	11844	86.738	67.832	1	6.1078	0.15107	0
LVQSPNSYFMDVK	13	1	0	Unmodified	_LVQSPNSYFMDVK_			0	0	P42677;Q5T4L4;H0YMV8;Q71UM5;C9JLI6	P42677;H0YMV8	P42677	RPS27;RPS27L	40S ribosomal protein S27;40S ribosomal protein S27-like	>sp|P42677|RS27_HUMAN 40S ribosomal protein S27 OS=Homo sapiens GN=RPS27 PE=1 SV=3;>tr|Q5T4L4|Q5T4L4_HUMAN 40S ribosomal protein S27 OS=Homo sapiens GN=RPS27 PE=1 SV=1;>tr|H0YMV8|H0YMV8_HUMAN 40S ribosomal protein S27 OS=Homo sapiens GN=RPS27L PE=1 SV=1;>s	MULTI-MSMS		JACB153_1	MDA-MB-231 R10K8	768.39	2	764.379	1526.74	39715.4	-0.7972	0.44482	-0.35238	764.882	768.387	47.596	19.867	0.69619	47.596	47.146	47.842	0		0	0	0	5.1128e-05	1	16181	132.47	132.47	1	6.2687	0.14274	0
LLDAVDTYIPVPAR	14	0	1	Unmodified	_LLDAVDTYIPVPAR_			0	0	P49411	P49411	P49411	TUFM	Elongation factor Tu, mitochondrial	>sp|P49411|EFTU_HUMAN Elongation factor Tu, mitochondrial OS=Homo sapiens GN=TUFM PE=1 SV=2	MULTI-MSMS		JACB153_1	MDA-MB-231 R10K8	776.93	2	771.93	1541.85	41141.6	-0.36624	0.14836	-0.21788	771.93	776.934	60.727	24.242	0.41223	60.727	60.466	60.879	3.8147e-06		0	0	0	5.4325e-05	1	21047	106.13	106.13	1	6.3012	0.81805	0
GLPLVDDGGWNTVPISK	17	1	0	Unmodified	_GLPLVDDGGWNTVPISK_			0	0	Q04637-9;Q04637-8;Q04637;E7EUU4;Q04637-3;E9PGM1;Q04637-4;E7EX73;Q04637-5;Q04637-7;Q04637-6;H7C044	Q04637-9	Q04637-9	EIF4G1	Eukaryotic translation initiation factor 4 gamma 1	>sp|Q04637-9|IF4G1_HUMAN Isoform 9 of Eukaryotic translation initiation factor 4 gamma 1 OS=Homo sapiens GN=EIF4G1;>sp|Q04637-8|IF4G1_HUMAN Isoform 8 of Eukaryotic translation initiation factor 4 gamma 1 OS=Homo sapiens GN=EIF4G1;>sp|Q04637|IF4G1_HUMAN Euk	MULTI-MSMS		JACB153_1	MDA-MB-231 R10K8	888.47	2	884.467	1766.92	37980.8	-0.64982	0.72946	0.079644	884.969	888.475	62.391	24.8	0.38801	62.391	62.169	62.557	0		0	0	0	9.8906e-09	1	21654	143.02	143.02	1	6.6193	0.19194	0
IANPVEGSTDR	11	0	1	Unmodified	_IANPVEGSTDR_			0	0	Q15366-6;Q15366;H3BRU6;B4DXP5;Q15366-3;Q15366-2;Q15366-4;Q15366-5;F8VZX2;Q15366-7;F8VRH0;H3BSS4	Q15366-6;Q15366-3	Q15366-3	PCBP2	Poly(rC)-binding protein 2	>sp|Q15366-6|PCBP2_HUMAN Isoform 6 of Poly(rC)-binding protein 2 OS=Homo sapiens GN=PCBP2;>sp|Q15366|PCBP2_HUMAN Poly(rC)-binding protein 2 OS=Homo sapiens GN=PCBP2 PE=1 SV=1;>tr|H3BRU6|H3BRU6_HUMAN Poly(rC)-binding protein 2 (Fragment) OS=Homo sapiens GN=	MULTI-MSMS		JACB153_1	MDA-MB-231 R10K8	584.79	2	579.791	1157.57	45478.4	-0.14564	0.36488	0.21925	579.792	584.795	22.49	11.5	0.54194	22.49	22.229	22.771	1.9073e-06		0	0	0	0.0006792	1	6203	103.75	54.251	1	6.9122	0.89736	0
IFVGGLSPDTPEEK	14	1	0	Unmodified	_IFVGGLSPDTPEEK_			0	0	Q14103;Q14103-2;Q14103-3;B4DTC3;Q14103-4;H0Y8G5;H0YA96;D6RAF8;D6RF44;F5H6R6	Q14103	Q14103	HNRNPD	Heterogeneous nuclear ribonucleoprotein D0	>sp|Q14103|HNRPD_HUMAN Heterogeneous nuclear ribonucleoprotein D0 OS=Homo sapiens GN=HNRNPD PE=1 SV=1;>sp|Q14103-2|HNRPD_HUMAN Isoform 2 of Heterogeneous nuclear ribonucleoprotein D0 OS=Homo sapiens GN=HNRNPD;>sp|Q14103-3|HNRPD_HUMAN Isoform 3 of Heterogen	MULTI-MSMS		JACB153_1	MDA-MB-231 R10K8	748.89	2	744.883	1487.75	39921.6	-0.33009	0.01819	-0.3119	744.884	748.89	43.262	18.42	0.53615	43.262	43.044	43.58	0		0	0	0	6.3431e-06	1	14487	145	145	1	7.1278	0.1053	0
LQEKEDLQELNDR	13	1	1	Unmodified	_LQEKEDLQELNDR_			0	0	P02545;P02545-3;P02545-6;P02545-2	P02545;P02545-2	P02545	LMNA	Prelamin-A/C;Lamin-A/C	>sp|P02545|LMNA_HUMAN Prelamin-A/C OS=Homo sapiens GN=LMNA PE=1 SV=1;>sp|P02545-3|LMNA_HUMAN Isoform ADelta10 of Prelamin-A/C OS=Homo sapiens GN=LMNA;>sp|P02545-6|LMNA_HUMAN Isoform 6 of Prelamin-A/C OS=Homo sapiens GN=LMNA;>sp|P02545-2|LMNA_HUMAN Isoform	MULTI-MSMS		JACB153_1	MDA-MB-231 R10K8	549.95	3	543.941	1628.8	46689.7	-0.067666	0.16957	0.10191	544.277	549.948	25.237	12.416	0.40767	25.237	25.073	25.481	0		0	0	0	1.1027e-06	1	7309	180.48	180.48	1	7.1853	10.589	0
IAEQVASFQEEK	12	1	0	Unmodified	_IAEQVASFQEEK_			0	0	P35221;P35221-2;G3XAM7;F8W845;P35221-3	P35221	P35221	CTNNA1	Catenin alpha-1	>sp|P35221|CTNA1_HUMAN Catenin alpha-1 OS=Homo sapiens GN=CTNNA1 PE=1 SV=1;>sp|P35221-2|CTNA1_HUMAN Isoform 2 of Catenin alpha-1 OS=Homo sapiens GN=CTNNA1;>tr|G3XAM7|G3XAM7_HUMAN Catenin (Cadherin-associated protein), alpha 1, 102kDa, isoform CRA_a OS=Homo	MULTI-MSMS		JACB153_1	MDA-MB-231 R10K8	693.85	2	689.846	1377.68	41599.3	-0.53041	0.6343	0.10389	689.845	693.854	30.567	14.186	0.22707	30.567	30.421	30.648	1.9073e-06		0	0	0	0.00026689	1	9497	105.65	85.81	1	7.2119	0.29638	0
GSDFDCELR	9	0	1	Unmodified	_GSDFDCELR_			0	0	P61978-3;Q5T6W5;Q5T6W2;P61978-2;P61978;Q5T6W1	P61978-3;P61978-2	P61978-2	HNRNPK	Heterogeneous nuclear ribonucleoprotein K	>sp|P61978-3|HNRPK_HUMAN Isoform 3 of Heterogeneous nuclear ribonucleoprotein K OS=Homo sapiens GN=HNRNPK;>tr|Q5T6W5|Q5T6W5_HUMAN Heterogeneous nuclear ribonucleoprotein K OS=Homo sapiens GN=HNRNPK PE=1 SV=1;>tr|Q5T6W2|Q5T6W2_HUMAN Heterogeneous nuclear ri	MULTI-MSMS		JACB153_1	MDA-MB-231 R10K8	554.73	2	549.73	1097.44	46885.6	0.01171	-0.31064	-0.29893	549.731	554.734	29.505	13.834	0.46085	29.505	29.297	29.757	0		0	0	0	0.00079958	1	9013	113.74	113.74	1	7.2566	0.94208	0
VQIEHISSLIK	11	1	0	Unmodified	_VQIEHISSLIK_			0	0	O00231-2;O00231	O00231-2	O00231-2	PSMD11	26S proteasome non-ATPase regulatory subunit 11	>sp|O00231-2|PSD11_HUMAN Isoform 2 of 26S proteasome non-ATPase regulatory subunit 11 OS=Homo sapiens GN=PSMD11;>sp|O00231|PSD11_HUMAN 26S proteasome non-ATPase regulatory subunit 11 OS=Homo sapiens GN=PSMD11 PE=1 SV=3	MULTI-MSMS		JACB153_1	MDA-MB-231 R10K8	425.59	3	422.919	1265.73	53383.7	0.10845	0.57908	0.68753	422.919	425.59	37.213	16.401	0.5891	37.213	36.886	37.475	0		0	0	0	0.0089627	1	12121	74.611	44.804	1	7.3588	0.22029	0
DLLHPSPEEEK	11	1	0	Unmodified	_DLLHPSPEEEK_			0	0	P42677;Q5T4L4	P42677	P42677	RPS27	40S ribosomal protein S27	>sp|P42677|RS27_HUMAN 40S ribosomal protein S27 OS=Homo sapiens GN=RPS27 PE=1 SV=3;>tr|Q5T4L4|Q5T4L4_HUMAN 40S ribosomal protein S27 OS=Homo sapiens GN=RPS27 PE=1 SV=1	MULTI-MSMS		JACB153_1	MDA-MB-231 R10K8	651.32	2	647.32	1292.62	44069.9	-0.84237	-1.3702	-2.2125	647.319	651.326	27.429	13.142	0.3658	27.429	27.234	27.6	0		0	0	0	0.00016379	1	8179	145.91	145.91	1	7.3957	0.28541	0
MDSTEPPYSQK	11	1	0	Unmodified	_MDSTEPPYSQK_			0	0	P68104;Q5VTE0	P68104	P68104	EEF1A1;EEF1A1P5	Elongation factor 1-alpha 1;Putative elongation factor 1-alpha-like 3	>sp|P68104|EF1A1_HUMAN Elongation factor 1-alpha 1 OS=Homo sapiens GN=EEF1A1 PE=1 SV=1;>sp|Q5VTE0|EF1A3_HUMAN Putative elongation factor 1-alpha-like 3 OS=Homo sapiens GN=EEF1A1P5 PE=5 SV=1	MULTI-MSMS		JACB153_1	MDA-MB-231 R10K8	645.79	2	641.785	1281.55	43964	-0.74639	-0.24691	-0.9933	641.784	645.792	21.028	11.013	0.64545	21.028	20.746	21.391	0		0	0	0	0.00052366	1	5655	118.9	118.9	1	7.4304	0.23192	0
HALIIYDDLSK	11	1	0	Unmodified	_HALIIYDDLSK_			0	0	P25705;P25705-3;P25705-2	P25705	P25705	ATP5A1	ATP synthase subunit alpha, mitochondrial	>sp|P25705|ATPA_HUMAN ATP synthase subunit alpha, mitochondrial OS=Homo sapiens GN=ATP5A1 PE=1 SV=1;>sp|P25705-3|ATPA_HUMAN Isoform 3 of ATP synthase subunit alpha, mitochondrial OS=Homo sapiens GN=ATP5A1;>sp|P25705-2|ATPA_HUMAN Isoform 2 of ATP synthase s	MULTI-MSMS		JACB153_1	MDA-MB-231 R10K8	648.36	2	644.351	1286.69	43330.1	-0.35886	-0.023208	-0.38207	644.351	648.358	38.688	16.898	0.49771	38.688	38.49	38.988	-3.8147e-06		0	0	0	0.00050193	1	12716	121.02	121.02	1	7.7066	0.2362	0
FGVICLEDLIHEIAFPGK	18	1	0	Unmodified	_FGVICLEDLIHEIAFPGK_			0	0	Q6DKI1	Q6DKI1	Q6DKI1	RPL7L1	60S ribosomal protein L7-like 1	>sp|Q6DKI1|RL7L_HUMAN 60S ribosomal protein L7-like 1 OS=Homo sapiens GN=RPL7L1 PE=1 SV=1	MULTI-MSMS		JACB153_1	MDA-MB-231 R10K8	689.7	3	686.696	2057.07	42665.4	-0.36831	0.31613	-0.052186	686.695	689.702	89.938	33.979	0.79177	89.938	89.542	90.333	0		0	0	0	0.0015961	1	31425	68.173	68.173	1	7.9538	0.38233	0
LAGESESNLR	10	0	1	Unmodified	_LAGESESNLR_			0	0	P55072	P55072	P55072	VCP	Transitional endoplasmic reticulum ATPase	>sp|P55072|TERA_HUMAN Transitional endoplasmic reticulum ATPase OS=Homo sapiens GN=VCP PE=1 SV=4	MULTI-MSMS		JACB153_1	MDA-MB-231 R10K8	543.28	2	538.273	1074.53	47325.2	0.22215	-0.074205	0.14794	538.274	543.277	18.345	10.116	0.39597	18.345	18.068	18.464	0		0	0	0	0.00055158	1	4645	135.86	67.202	1	8.4221	1.0934	0
LASYLDK	7	1	0	Unmodified	_LASYLDK_			0	0	CON__Q9QWL7;CON__P02533;P02533;CON__P08727;P08727;C9JM50;CON__P19001;CON__A2A4G1;CON__P08779;P08779;K7EPJ9;CON__Q99456;Q99456;CON__P13645;P13645	CON__Q9QWL7;CON__P08727;CON__P13645	CON__P08727	KRT14;KRT19;KRT16;KRT12;KRT10	Keratin, type I cytoskeletal 14;Keratin, type I cytoskeletal 19;Keratin, type I cytoskeletal 16;Keratin, type I cytoskeletal 12;Keratin, type I cytoskeletal 10	>Q9QWL7 SWISS-PROT:Q9QWL7 Tax_Id=10090 Gene_Symbol=Krt17 Keratin, type I cytoskeletal 17;>P02533 SWISS-PROT:P02533 Tax_Id=9606 Gene_Symbol=KRT14 Keratin, type I cytoskeletal 14;>sp|P02533|K1C14_HUMAN Keratin, type I cytoskeletal 14 OS=Homo sapiens GN=KRT14	MULTI-MSMS		JACB153_1	MDA-MB-231 R10K8	409.23	2	405.224	808.433	54340.1	-0.15976	1.1765	1.0168	405.224	409.231	24.048	12.014	0.5124	24.048	23.887	24.399	0		0	0	0	0.0177	1	6858	67.981	40.844	1	8.443	0.23953	0
SSTPLPTISSSAENTR	16	0	1	Unmodified	_SSTPLPTISSSAENTR_			0	0	P42167;G5E972;P42167-2;H0YJH7;A2T926;P42166	P42167;P42166	P42166	TMPO	Lamina-associated polypeptide 2, isoforms beta/gamma;Thymopoietin;Thymopentin;Lamina-associated polypeptide 2, isoform alpha;Thymopoietin;Thymopentin	>sp|P42167|LAP2B_HUMAN Lamina-associated polypeptide 2, isoforms beta/gamma OS=Homo sapiens GN=TMPO PE=1 SV=2;>tr|G5E972|G5E972_HUMAN Thymopentin OS=Homo sapiens GN=TMPO PE=1 SV=1;>sp|P42167-2|LAP2B_HUMAN Isoform Gamma of Lamina-associated polypeptide 2, i	MULTI-MSMS		JACB153_1	MDA-MB-231 R10K8	829.42	2	824.413	1646.81	39017.8	-1.0682	0.20863	-0.85961	824.413	829.417	34.119	15.37	0.43551	34.119	33.912	34.347	0		0	0	0	1.1854e-05	1	10855	99.451	99.451	1	8.544	1.1092	0
EGLPVALDK	9	1	0	Unmodified	_EGLPVALDK_			0	0	Q9Y224	Q9Y224	Q9Y224	C14orf166	UPF0568 protein C14orf166	>sp|Q9Y224|CN166_HUMAN UPF0568 protein C14orf166 OS=Homo sapiens GN=C14orf166 PE=1 SV=1	MULTI-MSMS		JACB153_1	MDA-MB-231 R10K8	475.28	2	471.269	940.523	50833.2	0.54899	-0.020634	0.52835	471.268	475.276	37.689	16.564	0.33744	37.689	37.504	37.842	0		0	0	0	0.0086472	1	12320	67.704	67.704	1	8.6103	0.3052	0
NAVWALSNLCR	11	0	1	Unmodified	_NAVWALSNLCR_			0	0	F5GYL8;O60684;F5H4G7;Q5TFJ7;O15131;P52294;C9JYI4	F5GYL8;P52294	P52294	KPNA6;KPNA5;KPNA1	Importin subunit alpha;Importin subunit alpha-7;Importin subunit alpha-6;Importin subunit alpha-1	>tr|F5GYL8|F5GYL8_HUMAN Importin subunit alpha OS=Homo sapiens GN=KPNA6 PE=1 SV=1;>sp|O60684|IMA7_HUMAN Importin subunit alpha-7 OS=Homo sapiens GN=KPNA6 PE=1 SV=1;>tr|F5H4G7|F5H4G7_HUMAN Importin subunit alpha OS=Homo sapiens GN=KPNA6 PE=1 SV=1;>tr|Q5TFJ7	MULTI-MSMS		JACB153_1	MDA-MB-231 R10K8	657.34	2	652.332	1302.65	42617.4	-0.37702	1.1168	0.73976	652.335	657.337	51.776	21.255	0.40689	51.776	51.575	51.982	0		0	0	0	1.1856e-05	1	17765	157.38	146.47	1	8.7118	1.131	0
MDVLVSECSAR	11	0	1	Acetyl (Protein N-term)	_(ac)MDVLVSECSAR_			1	0	P54136;E5RJM9;E5RH09;E5RI24	P54136	P54136	RARS	Arginine--tRNA ligase, cytoplasmic	>sp|P54136|SYRC_HUMAN Arginine--tRNA ligase, cytoplasmic OS=Homo sapiens GN=RARS PE=1 SV=2;>tr|E5RJM9|E5RJM9_HUMAN Arginine--tRNA ligase, cytoplasmic OS=Homo sapiens GN=RARS PE=1 SV=1;>tr|E5RH09|E5RH09_HUMAN Arginine--tRNA ligase, cytoplasmic OS=Homo sapie	MULTI-SECPEP		JACB153_1	MDA-MB-231 R10K8	659.59	2	654.8	1307.59	43297.2	-0.37596	-0.36462	-0.74058	655.3	659.804	61.915	24.641	0.41388	61.915	61.704	62.118	0		0	0	0	0.049264	1	21542	34.05	47.712	1	9.4073	1.2213	0
RAPFDLFENR	10	0	2	Unmodified	_RAPFDLFENR_			0	0	P07900-2;P07900;Q86U12	P07900-2	P07900-2	HSP90AA1	Heat shock protein HSP 90-alpha	>sp|P07900-2|HS90A_HUMAN Isoform 2 of Heat shock protein HSP 90-alpha OS=Homo sapiens GN=HSP90AA1;>sp|P07900|HS90A_HUMAN Heat shock protein HSP 90-alpha OS=Homo sapiens GN=HSP90AA1 PE=1 SV=5;>tr|Q86U12|Q86U12_HUMAN Full-length cDNA clone CS0CAP007YF18 of T	MULTI-MSMS		JACB153_1	MDA-MB-231 R10K8	428.89	3	422.219	1263.64	53662.1	0.11309	-0.16306	-0.049969	422.553	428.891	45.383	19.129	1.1676	45.383	44.735	45.903	0		0	0	0	0.00094956	2	15366	107.83	107.83	1	9.7809	10.475	0
LLDSEIK	7	1	0	Unmodified	_LLDSEIK_			0	0	P17980;R4GNH3;E9PM69;E9PKD5;E9PMD8;E9PN50;E9PLG2	P17980	P17980	PSMC3	26S protease regulatory subunit 6A	>sp|P17980|PRS6A_HUMAN 26S protease regulatory subunit 6A OS=Homo sapiens GN=PSMC3 PE=1 SV=3;>tr|R4GNH3|R4GNH3_HUMAN 26S protease regulatory subunit 6A OS=Homo sapiens GN=PSMC3 PE=1 SV=1;>tr|E9PM69|E9PM69_HUMAN 26S protease regulatory subunit 6A OS=Homo sa	MULTI-MSMS		JACB153_1	MDA-MB-231 R10K8	413.24	2	409.237	816.459	55282.7	-0.040617	-0.76925	-0.80987	409.236	413.244	27.185	13.064	0.59691	27.185	27.003	27.6	0		0	0	0	0.0070427	1	8091	104.45	0	1	9.8418	0.3596	0
LQVTMPGIK	9	1	0	Unmodified	_LQVTMPGIK_			0	0	Q09666	Q09666	Q09666	AHNAK	Neuroblast differentiation-associated protein AHNAK	>sp|Q09666|AHNK_HUMAN Neuroblast differentiation-associated protein AHNAK OS=Homo sapiens GN=AHNAK PE=1 SV=2	MULTI-MSMS		JACB153_1	MDA-MB-231 R10K8	497.8	2	493.789	985.563	50298	0.091791	0.4562	0.54799	493.789	497.796	41.716	17.901	0.44532	41.716	41.458	41.903	0		0	0	0	0.00067105	1	13888	122.13	122.13	1	9.944	0.32014	0
TVFAEHISDECK	12	1	0	Unmodified	_TVFAEHISDECK_			0	0	P39023;G5E9G0;H7C422;B5MCW2;H7C3M2;F8WCR1	P39023	P39023	RPL3	60S ribosomal protein L3	>sp|P39023|RL3_HUMAN 60S ribosomal protein L3 OS=Homo sapiens GN=RPL3 PE=1 SV=2;>tr|G5E9G0|G5E9G0_HUMAN 60S ribosomal protein L3 OS=Homo sapiens GN=RPL3 PE=1 SV=1;>tr|H7C422|H7C422_HUMAN 60S ribosomal protein L3 (Fragment) OS=Homo sapiens GN=RPL3 PE=1 SV=1	MULTI-MSMS		JACB153_1	MDA-MB-231 R10K8	481.89	3	479.222	1434.64	50516.7	0.27611	-0.71033	-0.43422	479.221	481.894	25.074	12.362	0.5538	25.074	24.81	25.364	0		0	0	0	0.0014144	1	7224	91.914	73.183	1	10.1	0.28296	0
LPVDIAYK	8	1	0	Unmodified	_LPVDIAYK_			0	0	P15924;P15924-3;P15924-2	P15924	P15924	DSP	Desmoplakin	>sp|P15924|DESP_HUMAN Desmoplakin OS=Homo sapiens GN=DSP PE=1 SV=3;>sp|P15924-3|DESP_HUMAN Isoform DSPIa of Desmoplakin OS=Homo sapiens GN=DSP;>sp|P15924-2|DESP_HUMAN Isoform DPII of Desmoplakin OS=Homo sapiens GN=DSP	MULTI-MSMS		JACB153_1	MDA-MB-231 R10K8	463.78	2	459.768	917.522	51205.2	-0.023037	0.39031	0.36728	459.768	463.776	32.986	14.992	0.39625	32.986	32.784	33.18	0		0	0	0	0.13966	1	10376	31.422	0	1	10.75	0.26579	0
AAHSEGNTTAGLDMR	15	0	1	Unmodified	_AAHSEGNTTAGLDMR_			0	0	P78371;P78371-2	P78371	P78371	CCT2	T-complex protein 1 subunit beta	>sp|P78371|TCPB_HUMAN T-complex protein 1 subunit beta OS=Homo sapiens GN=CCT2 PE=1 SV=4;>sp|P78371-2|TCPB_HUMAN Isoform 2 of T-complex protein 1 subunit beta OS=Homo sapiens GN=CCT2	MULTI-MSMS		JACB153_1	MDA-MB-231 R10K8	514.24	3	510.904	1529.69	47979.1	0.43229	-0.68538	-0.25309	511.238	514.24	18.5	10.17	0.43132	18.5	18.303	18.735	1.9073e-06		0	0	0	0.024857	1	4690	58.885	56.523	1	11.587	1.5043	0
CLIEILASR	9	0	1	Unmodified	_CLIEILASR_			0	0	A6NN80;E5RK63;E5RJF5;E5RI05;P08133;P08133-2	A6NN80;P08133	A6NN80	ANXA6	Annexin;Annexin A6	>tr|A6NN80|A6NN80_HUMAN Annexin OS=Homo sapiens GN=ANXA6 PE=1 SV=3;>tr|E5RK63|E5RK63_HUMAN Annexin (Fragment) OS=Homo sapiens GN=ANXA6 PE=1 SV=1;>tr|E5RJF5|E5RJF5_HUMAN Annexin (Fragment) OS=Homo sapiens GN=ANXA6 PE=1 SV=2;>tr|E5RI05|E5RI05_HUMAN Annexin O	MULTI-MSMS		JACB153_1	MDA-MB-231 R10K8	542.81	2	537.802	1073.59	47326.3	0.1784	-0.12614	0.052265	537.802	542.807	53.708	21.9	0.43643	53.708	53.484	53.92	0		0	0	0	0.00064429	1	18482	123.88	123.88	1	11.694	1.5182	0
YLAEVATGEK	10	1	0	Unmodified	_YLAEVATGEK_			0	0	P61981	P61981	P61981	YWHAG	14-3-3 protein gamma;14-3-3 protein gamma, N-terminally processed	>sp|P61981|1433G_HUMAN 14-3-3 protein gamma OS=Homo sapiens GN=YWHAG PE=1 SV=2	MULTI-MSMS		JACB153_1	MDA-MB-231 R10K8	544.79	2	540.782	1079.55	47297.9	-0.12988	0.59147	0.46158	540.782	544.789	25.777	12.594	0.44305	25.777	25.533	25.976	-1.9073e-06		0	0	0	0.0011914	1	7515	97.456	90.853	1	12.074	0.37972	0
FGWDCHGLPVEYEIDK	16	1	0	Unmodified	_FGWDCHGLPVEYEIDK_			0	0	P41252;Q5TCD1	P41252	P41252	IARS	Isoleucine--tRNA ligase, cytoplasmic	>sp|P41252|SYIC_HUMAN Isoleucine--tRNA ligase, cytoplasmic OS=Homo sapiens GN=IARS PE=1 SV=2;>tr|Q5TCD1|Q5TCD1_HUMAN Isoleucine--tRNA ligase, cytoplasmic (Fragment) OS=Homo sapiens GN=IARS PE=1 SV=1	MULTI-MSMS		JACB153_1	MDA-MB-231 R10K8	658.64	3	655.633	1963.88	44222.8	-0.42925	0.033765	-0.39549	655.634	658.639	55.072	22.36	0.50215	55.072	54.782	55.284	0		0	0	0	0.075803	1	19028	49.463	47.546	1	12.39	0.43097	0
DLEAHIDSANK	11	1	0	Unmodified	_DLEAHIDSANK_			0	0	P35579;P35579-2	P35579	P35579	MYH9	Myosin-9	>sp|P35579|MYH9_HUMAN Myosin-9 OS=Homo sapiens GN=MYH9 PE=1 SV=4;>sp|P35579-2|MYH9_HUMAN Isoform 2 of Myosin-9 OS=Homo sapiens GN=MYH9	MULTI-MSMS		JACB153_1	MDA-MB-231 R10K8	407.54	3	404.867	1211.58	54585.9	-0.029248	-0.076466	-0.10571	405.202	407.538	21.471	11.156	0.77053	21.471	20.993	21.763	0		0	0	0	0.0073772	1	5837	78.342	78.342	1	12.395	0.31794	0
VEEQEPELTSTPNFVVEVIK	20	1	0	Unmodified	_VEEQEPELTSTPNFVVEVIK_			0	0	Q07021;I3L3B0;I3L3Q7	Q07021	Q07021	C1QBP	Complement component 1 Q subcomponent-binding protein, mitochondrial	>sp|Q07021|C1QBP_HUMAN Complement component 1 Q subcomponent-binding protein, mitochondrial OS=Homo sapiens GN=C1QBP PE=1 SV=1;>tr|I3L3B0|I3L3B0_HUMAN Complement component 1 Q subcomponent-binding protein, mitochondrial OS=Homo sapiens GN=C1QBP PE=1 SV=1;>	MULTI-MSMS		JACB153_1	MDA-MB-231 R10K8	766.07	3	763.062	2286.16	40335.4	-0.39598	0.34002	-0.05597	763.062	766.068	65.476	25.826	0.69505	65.476	64.998	65.693	7.6294e-06		0	0	0	4.0521e-07	1	22752	100.67	100.67	1	13.256	0.36689	0
GIAQMLEK	8	1	0	Unmodified	_GIAQMLEK_			0	0	Q5SRQ6;P67870;Q5SRQ3	Q5SRQ6	Q5SRQ6	CSNK2B	Casein kinase II subunit beta	>tr|Q5SRQ6|Q5SRQ6_HUMAN Casein kinase 2, beta polypeptide, isoform CRA_d OS=Homo sapiens GN=CSNK2B PE=1 SV=2;>sp|P67870|CSK2B_HUMAN Casein kinase II subunit beta OS=Homo sapiens GN=CSNK2B PE=1 SV=1;>tr|Q5SRQ3|Q5SRQ3_HUMAN Chimera CSNK2B-LY6G5B splicing iso	MULTI-MSMS		JACB153_1	MDA-MB-231 R10K8	449.25	2	445.244	888.474	53797.8	0.032134	-0.48471	-0.45257	445.243	449.251	35.65	15.885	0.40083	35.65	35.458	35.859	0		0	0	0	0.011279	1	11493	66.351	39.214	1	13.427	0.48677	0
NICQQVNIK	9	1	0	Unmodified	_NICQQVNIK_			0	0	Q14152;F5H335	Q14152	Q14152	EIF3A	Eukaryotic translation initiation factor 3 subunit A	>sp|Q14152|EIF3A_HUMAN Eukaryotic translation initiation factor 3 subunit A OS=Homo sapiens GN=EIF3A PE=1 SV=1;>tr|F5H335|F5H335_HUMAN Eukaryotic translation initiation factor 3 subunit A OS=Homo sapiens GN=EIF3A PE=1 SV=1	MULTI-MSMS		JACB153_1	MDA-MB-231 R10K8	562.8	2	558.795	1115.58	45844.9	-0.12651	0.26097	0.13445	558.796	562.802	25.297	12.433	0.31232	25.297	25.15	25.462	0		0	0	0	0.0001531	1	7335	149.65	146.71	1	13.452	0.47584	0
LHSLLGDYYQAIK	13	1	0	Unmodified	_LHSLLGDYYQAIK_			0	0	B0QY89;Q9Y262;Q9Y262-2;B0QY90	B0QY89	B0QY89	EIF3EIP;EIF3L	Eukaryotic translation initiation factor 3 subunit L	>tr|B0QY89|B0QY89_HUMAN Eukaryotic translation initiation factor 3 subunit L OS=Homo sapiens GN=EIF3L PE=1 SV=1;>sp|Q9Y262|EIF3L_HUMAN Eukaryotic translation initiation factor 3 subunit L OS=Homo sapiens GN=EIF3L PE=1 SV=1;>sp|Q9Y262-2|EIF3L_HUMAN Isoform	MULTI-MSMS		JACB153_1	MDA-MB-231 R10K8	510.28	3	507.608	1519.8	50065.8	0.089995	0.26605	0.35605	507.942	510.28	47.535	19.842	0.61195	47.535	47.202	47.814	0		0	0	0	3.5246e-05	1	16210	140.24	140.24	1	14.025	0.44509	0
IMSSPLSK	8	1	0	Unmodified	_IMSSPLSK_			0	0	P61254;J3QRC4;J3QQV1;J3QQQ9;J3QRI7;J3KTJ8;Q9UNX3;E5RIT6;J3KSS0;E5RHH1	P61254	P61254	RPL26;RPL26L1	60S ribosomal protein L26;60S ribosomal protein L26-like 1	>sp|P61254|RL26_HUMAN 60S ribosomal protein L26 OS=Homo sapiens GN=RPL26 PE=1 SV=1;>tr|J3QRC4|J3QRC4_HUMAN 60S ribosomal protein L26 (Fragment) OS=Homo sapiens GN=RPL26 PE=4 SV=1;>tr|J3QQV1|J3QQV1_HUMAN 60S ribosomal protein L26 OS=Homo sapiens GN=RPL26 PE	MULTI-MSMS		JACB153_1	MDA-MB-231 R10K8	435.75	2	431.739	861.463	51750	-0.29417	-0.52856	-0.82273	431.738	435.746	25.588	12.532	0.52411	25.588	25.364	25.888	0		0	0	0	0.010793	1	7454	67.897	21.527	1	16.439	0.49368	0
FGYVDFESAEDLEK	14	1	0	Unmodified	_FGYVDFESAEDLEK_			0	0	P19338	P19338	P19338	NCL	Nucleolin	>sp|P19338|NUCL_HUMAN Nucleolin OS=Homo sapiens GN=NCL PE=1 SV=3	MULTI-MSMS		JACB153_1	MDA-MB-231 R10K8	829.38	2	824.872	1647.73	38398.3	-0.87638	0.15984	-0.71654	825.376	828.88	57.742	23.242	0.4898	57.742	57.5	57.99	0		0	0	0	4.4672e-05	1	19938	110.98	110.98	1	17.191	0.41609	0
IDEPLEGSEDR	11	0	1	Unmodified	_IDEPLEGSEDR_			0	0	P61978-3;Q5T6W5;S4R359;P61978-2;P61978	P61978-3;P61978-2	P61978-2	HNRNPK	Heterogeneous nuclear ribonucleoprotein K	>sp|P61978-3|HNRPK_HUMAN Isoform 3 of Heterogeneous nuclear ribonucleoprotein K OS=Homo sapiens GN=HNRNPK;>tr|Q5T6W5|Q5T6W5_HUMAN Heterogeneous nuclear ribonucleoprotein K OS=Homo sapiens GN=HNRNPK PE=1 SV=1;>tr|S4R359|S4R359_HUMAN Heterogeneous nuclear ri	MULTI-MSMS		JACB153_1	MDA-MB-231 R10K8	635.29	2	630.291	1258.57	43346.2	-0.25625	-0.36392	-0.62016	630.794	635.295	26.887	12.965	0.8395	26.887	26.598	27.438	0		0	0	0	0.00075771	1	7933	96.103	94.851	1	17.282	2.2436	0
TGAVYLCPLTAHK	13	1	0	Unmodified	_TGAVYLCPLTAHK_			0	0	P26006-1;P26006;D6R9X8	P26006-1	P26006-1	ITGA3	Integrin alpha-3;Integrin alpha-3 heavy chain;Integrin alpha-3 light chain	>sp|P26006-1|ITA3_HUMAN Isoform 2 of Integrin alpha-3 OS=Homo sapiens GN=ITGA3;>sp|P26006|ITA3_HUMAN Integrin alpha-3 OS=Homo sapiens GN=ITGA3 PE=1 SV=5;>tr|D6R9X8|D6R9X8_HUMAN Integrin alpha-3 OS=Homo sapiens GN=ITGA3 PE=1 SV=2	MULTI-SECPEP		JACB153_1	MDA-MB-231 R10K8	480.99	3	477.587	1429.74	50833.6	0.26855	0.99362	1.2622	477.587	480.259	33.582	15.196	0.28646	33.582	33.432	33.718	3.8147e-06		0	0	0	5.7141e-07	1	10646	73.927	73.927	1	18.358	0.63648	0
GAPPSSNIEDFHGLLPK	17	1	0	Unmodified	_GAPPSSNIEDFHGLLPK_			0	0	A8MXP9;P43243;D6REM6;D6R991;H0Y8T4	A8MXP9	A8MXP9	MATR3	Matrin-3	>tr|A8MXP9|A8MXP9_HUMAN Matrin-3 OS=Homo sapiens GN=MATR3 PE=1 SV=1;>sp|P43243|MATR3_HUMAN Matrin-3 OS=Homo sapiens GN=MATR3 PE=1 SV=2;>tr|D6REM6|D6REM6_HUMAN Matrin-3 OS=Homo sapiens GN=MATR3 PE=1 SV=1;>tr|D6R991|D6R991_HUMAN Matrin-3 (Fragment) OS=Homo s	MULTI-MSMS		JACB153_1	MDA-MB-231 R10K8	596.31	3	593.641	1777.9	44959.4	-0.034452	0.31884	0.28439	593.641	596.646	46.469	19.486	0.64678	46.469	46.182	46.829	0		0	0	0	0.0013835	1	15762	74.12	74.12	1	19.252	0.59054	0
MADKDGDLIATK	12	2	0	Unmodified	_MADKDGDLIATK_			0	0	O43852-3;O43852;O43852-6;O43852-10	O43852-3	O43852-3	CALU	Calumenin	>sp|O43852-3|CALU_HUMAN Isoform 3 of Calumenin OS=Homo sapiens GN=CALU;>sp|O43852|CALU_HUMAN Calumenin OS=Homo sapiens GN=CALU PE=1 SV=2;>sp|O43852-6|CALU_HUMAN Isoform 6 of Calumenin OS=Homo sapiens GN=CALU;>sp|O43852-10|CALU_HUMAN Isoform 10 of Calumenin	MULTI-MSMS		JACB153_1	MDA-MB-231 R10K8	431.89	3	426.552	1276.63	51891.1	-0.31087	-0.017073	-0.32795	426.551	431.895	20.976	10.993	0.75541	20.976	20.582	21.338	0		0	0	0	0.00052183	1	5633	112.51	112.51	1	20.321	22.02	0
EAAENSLVAYK	11	1	0	Unmodified	_EAAENSLVAYK_			0	0	P62258;P62258-2;K7EM20	P62258	P62258	YWHAE	14-3-3 protein epsilon	>sp|P62258|1433E_HUMAN 14-3-3 protein epsilon OS=Homo sapiens GN=YWHAE PE=1 SV=1;>sp|P62258-2|1433E_HUMAN Isoform SV of 14-3-3 protein epsilon OS=Homo sapiens GN=YWHAE;>tr|K7EM20|K7EM20_HUMAN 14-3-3 protein epsilon (Fragment) OS=Homo sapiens GN=YWHAE PE=1	MULTI-MSMS		JACB153_1	MDA-MB-231 R10K8	601.81	2	597.804	1193.59	45277.6	-0.49093	1.1403	0.64935	598.81	601.811	28.883	13.628	0.42394	28.883	28.694	29.118	-1.9073e-06		0	0	0	0.00026645	1	8771	138.71	123.33	1	20.356	0.33028	0
LTVSNVLK	8	1	0	Unmodified	_LTVSNVLK_			0	0	P02786;G3V0E5;F5H6B1	P02786	P02786	TFRC	Transferrin receptor protein 1;Transferrin receptor protein 1, serum form	>sp|P02786|TFR1_HUMAN Transferrin receptor protein 1 OS=Homo sapiens GN=TFRC PE=1 SV=2;>tr|G3V0E5|G3V0E5_HUMAN Transferrin receptor (P90, CD71), isoform CRA_c OS=Homo sapiens GN=TFRC PE=1 SV=1;>tr|F5H6B1|F5H6B1_HUMAN Transferrin receptor protein 1, serum f	MULTI-MSMS		JACB153_1	MDA-MB-231 R10K8	441.28	2	437.274	872.533	52971	-0.43543	0.41315	-0.022279	437.273	441.281	33.895	15.3	0.30446	33.895	33.743	34.048	0		0	0	0	0.010314	1	10789	69.423	42.731	1	20.432	0.56625	0
VSLDVNHFAPDELTVK	16	1	0	Unmodified	_VSLDVNHFAPDELTVK_			0	0	P04792;F8WE04	P04792	P04792	HSPB1	Heat shock protein beta-1	>sp|P04792|HSPB1_HUMAN Heat shock protein beta-1 OS=Homo sapiens GN=HSPB1 PE=1 SV=2;>tr|F8WE04|F8WE04_HUMAN Heat shock protein beta-1 OS=Homo sapiens GN=HSPB1 PE=1 SV=1	MULTI-MSMS		JACB153_1	MDA-MB-231 R10K8	597.98	3	595.312	1782.92	44944.1	-0.1245	-0.15401	-0.27851	595.314	598.318	50.09	20.696	0.54831	50.09	49.785	50.333	0		0	0	0	4.6992e-09	1	17145	157.03	157.04	1	20.561	0.46857	0
HFVLDECDK	9	1	0	Unmodified	_HFVLDECDK_			0	0	O00148;O00148-2;B1Q2N1;K7EQN7;K7EPJ3	O00148	O00148	DDX39A;DDX39	ATP-dependent RNA helicase DDX39A	>sp|O00148|DX39A_HUMAN ATP-dependent RNA helicase DDX39A OS=Homo sapiens GN=DDX39A PE=1 SV=2;>sp|O00148-2|DX39A_HUMAN Isoform 2 of ATP-dependent RNA helicase DDX39A OS=Homo sapiens GN=DDX39A;>tr|B1Q2N1|B1Q2N1_HUMAN ATP-dependent RNA helicase DDX39A OS=Homo	MULTI-MSMS		JACB153_1	MDA-MB-231 R10K8	585.77	2	581.764	1161.51	45638.1	-0.13405	-0.013679	-0.14773	581.764	585.771	24.633	12.211	0.3322	24.633	24.477	24.81	0		0	0	0	0.000788	1	7114	114.5	114.5	1	23.407	0.78297	0
LFIGGLSFETTDESLR	16	0	1	Unmodified	_LFIGGLSFETTDESLR_			0	0	P09651;P09651-2;F8W6I7;P09651-3;Q32P51;F8VZ49;F8W646;F8VTQ5	P09651	P09651	HNRNPA1;HNRNPA1L2	Heterogeneous nuclear ribonucleoprotein A1;Heterogeneous nuclear ribonucleoprotein A1-like 2	>sp|P09651|ROA1_HUMAN Heterogeneous nuclear ribonucleoprotein A1 OS=Homo sapiens GN=HNRNPA1 PE=1 SV=5;>sp|P09651-2|ROA1_HUMAN Isoform A1-A of Heterogeneous nuclear ribonucleoprotein A1 OS=Homo sapiens GN=HNRNPA1;>tr|F8W6I7|F8W6I7_HUMAN Heterogeneous nuclea	MULTI-MSMS		JACB153_1	MDA-MB-231 R10K8	898.46	2	892.957	1783.9	37283.3	-0.65722	0.43523	-0.22199	893.458	897.962	66.925	26.308	0.88516	66.925	66.575	67.46	-7.6294e-06		0	0	0	7.1627e-06	2	23379	109.79	109.79	1	24.269	3.1507	0
VFLENVIR	8	0	1	Unmodified	_VFLENVIR_			0	0	P62805	P62805	P62805	HIST1H4A	Histone H4	>sp|P62805|H4_HUMAN Histone H4 OS=Homo sapiens GN=HIST1H4A PE=1 SV=2	MULTI-MSMS		JACB153_1	MDA-MB-231 R10K8	500.3	2	495.293	988.571	49787.8	-0.11788	0.20813	0.090247	495.293	500.297	47.6	19.867	1.1152	47.6	47.261	48.377	0		0	0	0	0.0020164	3	16140	123.69	68.32	1	24.411	3.1692	0
IFAPNHVVAK	10	1	0	Unmodified	_IFAPNHVVAK_			0	0	Q02543;M0R117;M0R1A7;M0R3D6	Q02543	Q02543	RPL18A	60S ribosomal protein L18a	>sp|Q02543|RL18A_HUMAN 60S ribosomal protein L18a OS=Homo sapiens GN=RPL18A PE=1 SV=2;>tr|M0R117|M0R117_HUMAN 60S ribosomal protein L18a OS=Homo sapiens GN=RPL18A PE=1 SV=1;>tr|M0R1A7|M0R1A7_HUMAN 60S ribosomal protein L18a OS=Homo sapiens GN=RPL18A PE=1 S	MULTI-MSMS		JACB153_1	MDA-MB-231 R10K8	368.55	3	365.882	1094.62	57376.5	0.19905	0.32337	0.52242	366.213	368.553	21.893	11.298	0.51532	21.893	21.679	22.195	0		0	0	0	0.0041455	1	5976	83.948	83.948	1	25.211	0.64937	0
EIAQDFK	7	1	0	Unmodified	_EIAQDFK_			0	0	Q71DI3;K7ES00;Q16695;B4DEB1;K7EMV3;P84243;K7EK07;P68431	Q71DI3;P84243;P68431	P84243	HIST2H3A;HIST3H3;H3F3A;HIST1H3A	Histone H3.2;Histone H3.1t;Histone H3;Histone H3.3;Histone H3.1	>sp|Q71DI3|H32_HUMAN Histone H3.2 OS=Homo sapiens GN=HIST2H3A PE=1 SV=3;>tr|K7ES00|K7ES00_HUMAN Histone H3.3 (Fragment) OS=Homo sapiens GN=H3F3B PE=1 SV=1;>sp|Q16695|H31T_HUMAN Histone H3.1t OS=Homo sapiens GN=HIST3H3 PE=1 SV=3;>tr|B4DEB1|B4DEB1_HUMAN Hist	MULTI-MSMS		JACB153_1	MDA-MB-231 R10K8	429.73	2	425.719	849.423	52387	-0.25273	-0.024665	-0.2774	425.718	429.726	22.944	11.647	0.61297	22.944	22.658	23.271	0		0	0	0	0.013074	1	6400	79.597	11.175	1	25.349	0.57488	0
STELLIR	7	0	1	Unmodified	_STELLIR_			0	0	Q71DI3;K7ES00;Q16695;B4DEB1;K7EMV3;Q5TEC6;Q6NXT2;K7EP01;P84243;K7EK07;P68431	Q71DI3;P84243;P68431	P84243	HIST2H3A;HIST3H3;H3F3A;HIST2H3PS2;H3F3C;HIST1H3A	Histone H3.2;Histone H3.1t;Histone H3;Histone H3.3C;Histone H3.3;Histone H3.1	>sp|Q71DI3|H32_HUMAN Histone H3.2 OS=Homo sapiens GN=HIST2H3A PE=1 SV=3;>tr|K7ES00|K7ES00_HUMAN Histone H3.3 (Fragment) OS=Homo sapiens GN=H3F3B PE=1 SV=1;>sp|Q16695|H31T_HUMAN Histone H3.1t OS=Homo sapiens GN=HIST3H3 PE=1 SV=3;>tr|B4DEB1|B4DEB1_HUMAN Hist	MULTI-MSMS		JACB153_1	MDA-MB-231 R10K8	421.25	2	416.25	830.486	54066.7	0.14363	0.088368	0.232	416.25	421.255	31.633	14.547	0.76111	31.633	31.253	32.014	-1.9073e-06		0	0	0	0.0070427	1	9836	104.45	39.644	1	25.405	3.2981	0
ELNYFAK	7	1	0	Unmodified	_ELNYFAK_			0	0	P00558;B7Z7A9	P00558	P00558	PGK1	Phosphoglycerate kinase 1;Phosphoglycerate kinase	>sp|P00558|PGK1_HUMAN Phosphoglycerate kinase 1 OS=Homo sapiens GN=PGK1 PE=1 SV=3;>tr|B7Z7A9|B7Z7A9_HUMAN Phosphoglycerate kinase OS=Homo sapiens GN=PGK1 PE=1 SV=1	MULTI-MSMS		JACB153_1	MDA-MB-231 R10K8	446.74	2	442.729	883.444	51393.4	0.011935	0.05767	0.069605	442.729	446.736	32.161	14.722	0.61078	32.161	31.902	32.512	0		0	0	0	0.015686	1	10051	73.039	32.936	1	25.744	0.49322	0
VVWVEESDKR	10	1	1	Unmodified	_VVWVEESDKR_			0	0	O00571;O00571-2	O00571	O00571	DDX3X	ATP-dependent RNA helicase DDX3X	>sp|O00571|DDX3X_HUMAN ATP-dependent RNA helicase DDX3X OS=Homo sapiens GN=DDX3X PE=1 SV=3;>sp|O00571-2|DDX3X_HUMAN Isoform 2 of ATP-dependent RNA helicase DDX3X OS=Homo sapiens GN=DDX3X	MULTI-MSMS		JACB153_1	MDA-MB-231 R10K8	422.23	3	416.219	1245.64	52971.1	-0.11695	-1.0879	-1.2048	416.219	422.226	23.864	11.958	0.63127	23.864	23.62	24.251	0		0	0	0	0.0047832	1	6741	79.974	67.76	1	26.483	39.028	0
SIQADGLVWGSSK	13	1	0	Unmodified	_SIQADGLVWGSSK_			0	0	P24534	P24534	P24534	EEF1B2	Elongation factor 1-beta	>sp|P24534|EF1B_HUMAN Elongation factor 1-beta OS=Homo sapiens GN=EEF1B2 PE=1 SV=3	MULTI-MSMS		JACB153_1	MDA-MB-231 R10K8	678.36	2	674.349	1346.68	40713	-0.56057	-4.2232	-4.7838	674.347	678.353	44.88	18.955	0.77152	44.88	44.592	45.363	0		0	0	0	0.00021083	2	15112	94.09	59.704	1	27.153	0.49137	0
IINEPTAAAIAYGLDK	16	1	0	Unmodified	_IINEPTAAAIAYGLDK_			0	0	P11142;E9PKE3;P11142-2;E9PN89;E9PLF4;E9PI65;P54652;P11021	P11142;P54652;P11021	P11142	HSPA8;HSPA2;HSPA5	Heat shock cognate 71 kDa protein;Heat shock-related 70 kDa protein 2;78 kDa glucose-regulated protein	>sp|P11142|HSP7C_HUMAN Heat shock cognate 71 kDa protein OS=Homo sapiens GN=HSPA8 PE=1 SV=1;>tr|E9PKE3|E9PKE3_HUMAN Heat shock cognate 71 kDa protein OS=Homo sapiens GN=HSPA8 PE=1 SV=1;>sp|P11142-2|HSP7C_HUMAN Isoform 2 of Heat shock cognate 71 kDa protein	MULTI-MSMS		JACB153_1	MDA-MB-231 R10K8	556.64	3	553.97	1658.89	47082.5	0.13264	-0.10511	0.027532	554.305	556.641	53.541	21.842	0.46599	53.541	53.274	53.74	0		0	0	0	6.7301e-08	1	18394	144.73	144.73	1	27.635	0.49036	0
EIVDSYLPVILDIIK	15	1	0	Unmodified	_EIVDSYLPVILDIIK_			0	0	B1AVU8;P07602-3;C9JIZ6;P07602-2;P07602	B1AVU8	B1AVU8	PSAP	Proactivator polypeptide;Saposin-A;Saposin-B-Val;Saposin-B;Saposin-C;Saposin-D	>tr|B1AVU8|B1AVU8_HUMAN Saposin-D OS=Homo sapiens GN=PSAP PE=1 SV=1;>sp|P07602-3|SAP_HUMAN Isoform Sap-mu-9 of Prosaposin OS=Homo sapiens GN=PSAP;>tr|C9JIZ6|C9JIZ6_HUMAN Prosaposin OS=Homo sapiens GN=PSAP PE=1 SV=1;>sp|P07602-2|SAP_HUMAN Isoform Sap-mu-6 o	MULTI-MSMS		JACB153_1	MDA-MB-231 R10K8	869.51	2	865.503	1728.99	39505.7	-0.51121	0.23401	-0.2772	865.503	869.51	94.371	43.76	0.6038	94.371	94.097	94.701	0		0	0	0	0.001726	2	32810	81.311	81.311	1	28.125	1.1447	0
WSSLACNIALDAVK	14	1	0	Unmodified	_WSSLACNIALDAVK_			0	0	P49368;P49368-2;B4DUR8;E9PRC8;Q5SZX6;E9PQ35;Q5SZW8	P49368	P49368	CCT3	T-complex protein 1 subunit gamma	>sp|P49368|TCPG_HUMAN T-complex protein 1 subunit gamma OS=Homo sapiens GN=CCT3 PE=1 SV=4;>sp|P49368-2|TCPG_HUMAN Isoform 2 of T-complex protein 1 subunit gamma OS=Homo sapiens GN=CCT3;>tr|B4DUR8|B4DUR8_HUMAN T-complex protein 1 subunit gamma OS=Homo sapie	MULTI-MSMS		JACB153_1	MDA-MB-231 R10K8	778.41	2	774.398	1546.78	39580.9	-0.51617	0.5098	-0.0063696	774.9	778.406	55.855	22.616	0.54655	55.855	55.597	56.143	0		0	0	0	4.5759e-05	1	19279	110.44	107.06	1	28.135	0.74429	0
GVDEVTIVNILTNR	14	0	1	Unmodified	_GVDEVTIVNILTNR_			0	0	P07355-2;P07355;H0YN42;H0YMU9;H0YMD0;H0YKS4;H0YMM1;H0YMW4;H0YKX9;H0YMT9;H0YLV6;H0YKZ7;H0YKL9;H0YKV8;H0YMD9	P07355-2	P07355-2	ANXA2	Annexin A2;Annexin	>sp|P07355-2|ANXA2_HUMAN Isoform 2 of Annexin A2 OS=Homo sapiens GN=ANXA2;>sp|P07355|ANXA2_HUMAN Annexin A2 OS=Homo sapiens GN=ANXA2 PE=1 SV=2;>tr|H0YN42|H0YN42_HUMAN Annexin (Fragment) OS=Homo sapiens GN=ANXA2 PE=1 SV=1;>tr|H0YMU9|H0YMU9_HUMAN Annexin OS=	MULTI-MSMS		JACB153_1	MDA-MB-231 R10K8	776.93	2	771.928	1541.84	40646.6	-0.58981	0.38459	-0.20522	772.43	776.932	68.171	26.726	0.80124	68.171	67.725	68.527	0		0	0	0	6.9332e-05	1	23681	98.582	85.704	1	28.223	3.664	0
VEHSDLSFSK	10	1	0	Unmodified	_VEHSDLSFSK_			0	0	F5H6I0;P61769;H0YLF3	F5H6I0	F5H6I0	B2M	Beta-2-microglobulin;Beta-2-microglobulin form pI 5.3	>tr|F5H6I0|F5H6I0_HUMAN Beta-2-microglobulin form pI 5.3 OS=Homo sapiens GN=B2M PE=1 SV=1;>sp|P61769|B2MG_HUMAN Beta-2-microglobulin OS=Homo sapiens GN=B2M PE=1 SV=1;>tr|H0YLF3|H0YLF3_HUMAN Beta-2-microglobulin form pI 5.3 (Fragment) OS=Homo sapiens GN=B2M	MULTI-MSMS		JACB153_1	MDA-MB-231 R10K8	386.2	3	383.524	1147.55	55810.9	-0.12082	0.1076	-0.013219	383.524	386.196	20.276	10.762	0.44065	20.276	20.072	20.512	0		0	0	0	0.005964	1	5359	77.744	66.212	1	29.954	0.93679	0
TLHPDLGTDK	10	1	0	Unmodified	_TLHPDLGTDK_			0	0	P00338-3;P00338;P00338-4;P00338-2;P00338-5	P00338-3	P00338-3	LDHA	L-lactate dehydrogenase A chain	>sp|P00338-3|LDHA_HUMAN Isoform 3 of L-lactate dehydrogenase A chain OS=Homo sapiens GN=LDHA;>sp|P00338|LDHA_HUMAN L-lactate dehydrogenase A chain OS=Homo sapiens GN=LDHA PE=1 SV=2;>sp|P00338-4|LDHA_HUMAN Isoform 4 of L-lactate dehydrogenase A chain OS=Hom	MULTI-MSMS		JACB153_1	MDA-MB-231 R10K8	368.86	3	366.193	1095.56	57212	0.40056	-0.27053	0.13004	366.526	368.864	19.029	10.345	0.67962	19.029	18.833	19.513	0		0	0	0	0.0012084	1	4948	96.171	96.171	1	30.52	0.85332	0
ITLPVDFVTADK	12	1	0	Unmodified	_ITLPVDFVTADK_			0	0	P00558;B7Z7A9;E7ERH5	P00558	P00558	PGK1	Phosphoglycerate kinase 1;Phosphoglycerate kinase	>sp|P00558|PGK1_HUMAN Phosphoglycerate kinase 1 OS=Homo sapiens GN=PGK1 PE=1 SV=3;>tr|B7Z7A9|B7Z7A9_HUMAN Phosphoglycerate kinase OS=Homo sapiens GN=PGK1 PE=1 SV=1;>tr|E7ERH5|E7ERH5_HUMAN Phosphoglycerate kinase OS=Homo sapiens GN=PGK1 PE=1 SV=1	MULTI-MSMS		JACB153_1	MDA-MB-231 R10K8	663.87	2	659.866	1317.72	41799.1	0.015324	-0.70738	-0.69205	659.866	663.873	60.106	24.036	0.4269	60.106	59.863	60.29	0		0	0	0	0.0065053	1	20818	82.543	73.01	1	30.751	0.75038	0
EAGNPGSLFGYSVALHR	17	0	1	Unmodified	_EAGNPGSLFGYSVALHR_			0	0	P26006-1;P26006;D6R9X8	P26006-1	P26006-1	ITGA3	Integrin alpha-3;Integrin alpha-3 heavy chain;Integrin alpha-3 light chain	>sp|P26006-1|ITA3_HUMAN Isoform 2 of Integrin alpha-3 OS=Homo sapiens GN=ITGA3;>sp|P26006|ITA3_HUMAN Integrin alpha-3 OS=Homo sapiens GN=ITGA3 PE=1 SV=5;>tr|D6R9X8|D6R9X8_HUMAN Integrin alpha-3 OS=Homo sapiens GN=ITGA3 PE=1 SV=2	MULTI-MSMS		JACB153_1	MDA-MB-231 R10K8	595.97	3	592.301	1773.88	45220.6	0.078281	0.55451	0.6328	592.302	595.637	49.601	20.538	0.51698	49.601	49.325	49.842	3.8147e-06		0	0	0	1.0108e-05	1	16922	93.754	93.754	1	31.053	4.0314	0
AYLPVNESFGFTADLR	16	0	1	Unmodified	_AYLPVNESFGFTADLR_			0	0	P13639	P13639	P13639	EEF2	Elongation factor 2	>sp|P13639|EF2_HUMAN Elongation factor 2 OS=Homo sapiens GN=EEF2 PE=1 SV=4	MULTI-MSMS		JACB153_1	MDA-MB-231 R10K8	603.97	3	600.637	1798.89	45743.9	-0.047829	0.23386	0.18603	600.971	603.973	64.875	25.625	0.58311	64.875	64.631	65.214	0		0	0	0	1.5644e-07	1	22535	127.88	127.88	1	31.159	4.0452	0
INEILSNALK	10	1	0	Unmodified	_INEILSNALK_			0	0	P52272;P52272-2;M0R019	P52272	P52272	HNRNPM	Heterogeneous nuclear ribonucleoprotein M	>sp|P52272|HNRPM_HUMAN Heterogeneous nuclear ribonucleoprotein M OS=Homo sapiens GN=HNRNPM PE=1 SV=3;>sp|P52272-2|HNRPM_HUMAN Isoform 2 of Heterogeneous nuclear ribonucleoprotein M OS=Homo sapiens GN=HNRNPM;>tr|M0R019|M0R019_HUMAN Heterogeneous nuclear rib	MULTI-MSMS		JACB153_1	MDA-MB-231 R10K8	561.83	2	557.827	1113.64	47288.3	0.10802	0.81186	0.91988	557.827	561.835	41.87	17.957	0.48574	41.87	41.626	42.112	0		0	0	0	0.00084093	1	13974	123.96	105.21	1	31.344	0.67754	0
GFTIPEAFR	9	0	1	Unmodified	_GFTIPEAFR_			0	0	O00299	O00299	O00299	CLIC1	Chloride intracellular channel protein 1	>sp|O00299|CLIC1_HUMAN Chloride intracellular channel protein 1 OS=Homo sapiens GN=CLIC1 PE=1 SV=4	MULTI-MSMS		JACB153_1	MDA-MB-231 R10K8	524.28	2	519.274	1036.53	49183.3	0.43974	0.14358	0.58332	519.776	524.279	52.555	21.52	0.78106	52.555	52.261	53.042	0		0	0	0	0.003449	2	18015	85.731	64.283	1	31.429	4.0802	0
HEQNIDCGGGYVK	13	1	0	Unmodified	_HEQNIDCGGGYVK_			0	0	P27797	P27797	P27797	CALR	Calreticulin	>sp|P27797|CALR_HUMAN Calreticulin OS=Homo sapiens GN=CALR PE=1 SV=1	MULTI-MSMS		JACB153_1	MDA-MB-231 R10K8	495.56	3	492.889	1475.65	49266.4	-0.29289	-0.66212	-0.95501	492.89	495.561	17.615	9.8685	0.60429	17.615	17.404	18.008	0		0	0	0	0.00014275	1	4368	108.72	106.08	1	31.469	0.60525	0
LLGASELPIVTPALR	15	0	1	Unmodified	_LLGASELPIVTPALR_			0	0	P52292	P52292	P52292	KPNA2	Importin subunit alpha-2	>sp|P52292|IMA1_HUMAN Importin subunit alpha-1 OS=Homo sapiens GN=KPNA2 PE=1 SV=1	MULTI-MSMS		JACB153_1	MDA-MB-231 R10K8	780.47	2	775.469	1548.92	39725.5	-0.32963	-0.13084	-0.46047	775.469	780.473	63.75	25.252	0.49459	63.75	63.525	64.02	0		0	0	0	2.7737e-07	1	22123	130.24	130.24	1	31.717	4.1176	0
DLSFFGGLLR	10	0	1	Unmodified	_DLSFFGGLLR_			0	0	Q32P28-3;Q32P28;Q32P28-4;Q32P28-2;E2QRI1	Q32P28-3	Q32P28-3	LEPRE1	Prolyl 3-hydroxylase 1	>sp|Q32P28-3|P3H1_HUMAN Isoform 3 of Prolyl 3-hydroxylase 1 OS=Homo sapiens GN=LEPRE1;>sp|Q32P28|P3H1_HUMAN Prolyl 3-hydroxylase 1 OS=Homo sapiens GN=LEPRE1 PE=1 SV=2;>sp|Q32P28-4|P3H1_HUMAN Isoform 4 of Prolyl 3-hydroxylase 1 OS=Homo sapiens GN=LEPRE1;>sp	MULTI-MSMS		JACB153_1	MDA-MB-231 R10K8	567.81	2	562.809	1123.6	46946.5	0.24773	-0.12184	0.12589	563.307	567.813	78.644	30.214	0.46247	78.644	78.393	78.855	-7.6294e-06		0	0	0	0.0018241	1	27459	91.867	82.545	1	32.404	4.2068	0
TIVITSHPGQIVK	13	1	0	Unmodified	_TIVITSHPGQIVK_			0	0	P31689;P31689-2;B7Z5C0	P31689	P31689	DNAJA1	DnaJ homolog subfamily A member 1	>sp|P31689|DNJA1_HUMAN DnaJ homolog subfamily A member 1 OS=Homo sapiens GN=DNAJA1 PE=1 SV=2;>sp|P31689-2|DNJA1_HUMAN Isoform 2 of DnaJ homolog subfamily A member 1 OS=Homo sapiens GN=DNAJA1;>tr|B7Z5C0|B7Z5C0_HUMAN DnaJ homolog subfamily A member 1 OS=Homo	MULTI-MSMS		JACB153_1	MDA-MB-231 R10K8	467.62	3	464.945	1391.81	50762.5	-0.085296	-0.37741	-0.4627	464.944	467.616	28.465	13.489	0.36899	28.465	28.258	28.627	1.9073e-06		0	0	0	0.0063902	1	8618	77.185	71.47	1	32.875	1.0755	0
DNAMLEYLK	9	1	0	Unmodified	_DNAMLEYLK_			0	0	P15311;E7EQR4	P15311	P15311	EZR	Ezrin	>sp|P15311|EZRI_HUMAN Ezrin OS=Homo sapiens GN=EZR PE=1 SV=4;>tr|E7EQR4|E7EQR4_HUMAN Ezrin OS=Homo sapiens GN=EZR PE=1 SV=2	MULTI-MSMS		JACB153_1	MDA-MB-231 R10K8	552.78	2	548.771	1095.53	46298.2	0.1997	0.56022	0.75992	548.772	552.778	52.085	21.366	0.88359	52.085	51.721	52.604	0		0	0	0	0.0061736	1	17854	76.282	45.712	1	32.931	0.85245	0
MQQQLDEYQELLDIK	15	1	0	Unmodified	_MQQQLDEYQELLDIK_			0	0	P02545;P02545-3;P02545-6;P02545-4;P02545-5;P02545-2;Q5TCI8	P02545;P02545-2	P02545	LMNA	Prelamin-A/C;Lamin-A/C	>sp|P02545|LMNA_HUMAN Prelamin-A/C OS=Homo sapiens GN=LMNA PE=1 SV=1;>sp|P02545-3|LMNA_HUMAN Isoform ADelta10 of Prelamin-A/C OS=Homo sapiens GN=LMNA;>sp|P02545-6|LMNA_HUMAN Isoform 6 of Prelamin-A/C OS=Homo sapiens GN=LMNA;>sp|P02545-4|LMNA_HUMAN Isoform	MULTI-MSMS		JACB153_1	MDA-MB-231 R10K8	951.47	2	947.467	1892.92	35204.8	-0.71783	-1.0745	-1.7923	947.464	951.474	61.794	24.6	0.69154	61.794	61.57	62.261	-3.8147e-06		0	0	0	6.1813e-06	1	21398	118.33	104.08	1	33.103	0.68318	0
TITLEVEPSDTIENVK	16	1	0	Unmodified	_TITLEVEPSDTIENVK_			0	0	P62979;P0CG48;F5H041;Q96C32;P0CG47;J3QKN0;F5GXK7;F5H747;F5H388;B4DV12;F5H265;F5H2Z3;F5GYU3;P62987;F5H6Q2;J3QTR3;J3QS39;J3QRK5;J3QLP7;M0R1V7;F5GZ39;J3QSA3	P62979	P62979	RPS27A;UBC;UBB;UBA52	Ubiquitin-40S ribosomal protein S27a;Ubiquitin;40S ribosomal protein S27a;Polyubiquitin-C;Ubiquitin;Polyubiquitin-B;Ubiquitin;Ubiquitin-60S ribosomal protein L40;Ubiquitin;60S ribosomal protein L40	>sp|P62979|RS27A_HUMAN Ubiquitin-40S ribosomal protein S27a OS=Homo sapiens GN=RPS27A PE=1 SV=2;>sp|P0CG48|UBC_HUMAN Polyubiquitin-C OS=Homo sapiens GN=UBC PE=1 SV=3;>tr|F5H041|F5H041_HUMAN Polyubiquitin-C OS=Homo sapiens GN=UBC PE=2 SV=1;>tr|Q96C32|Q96C32	MULTI-MSMS		JACB153_1	MDA-MB-231 R10K8	898.47	2	894.467	1786.92	36986.7	-0.69217	-0.14434	-0.83651	894.467	898.474	50.067	20.693	0.49083	50.067	49.842	50.333	0		0	0	0	9.4004e-10	3	17087	181.74	181.74	1	33.796	0.39706	0
LITEDVQGK	9	1	0	Unmodified	_LITEDVQGK_			0	0	P61247;D6RAT0;D6RG13;E9PFI5;H0Y8L7;F5H4F9;D6RB09;D6RAS7;D6RED7;D6RGE0	P61247	P61247	RPS3A	40S ribosomal protein S3a	>sp|P61247|RS3A_HUMAN 40S ribosomal protein S3a OS=Homo sapiens GN=RPS3A PE=1 SV=2;>tr|D6RAT0|D6RAT0_HUMAN 40S ribosomal protein S3a OS=Homo sapiens GN=RPS3A PE=1 SV=1;>tr|D6RG13|D6RG13_HUMAN 40S ribosomal protein S3a (Fragment) OS=Homo sapiens GN=RPS3A PE	MULTI-MSMS		JACB153_1	MDA-MB-231 R10K8	505.78	2	501.777	1001.54	48969.9	-0.1228	0.092316	-0.03048	502.277	505.784	23.339	11.781	0.43345	23.339	23.187	23.62	0		0	0	0	0.0041881	1	6539	83.168	83.168	1	35.339	0.76743	0
VDIDAPDVDVHGPDWHLK	18	1	0	Unmodified	_VDIDAPDVDVHGPDWHLK_			0	0	Q09666	Q09666	Q09666	AHNAK	Neuroblast differentiation-associated protein AHNAK	>sp|Q09666|AHNK_HUMAN Neuroblast differentiation-associated protein AHNAK OS=Homo sapiens GN=AHNAK PE=1 SV=2	MULTI-MSMS		JACB153_1	MDA-MB-231 R10K8	510.01	4	507.751	2026.97	48890	0.37275	0.04136	0.41411	507.752	510.005	46.262	19.419	0.65531	46.262	46.078	46.734	0		0	0	0	2.0241e-07	1	15668	116.06	116.06	1	35.357	0.41117	0
SFLLDLLNATGK	12	1	0	Unmodified	_SFLLDLLNATGK_			0	0	O00571;O00571-2	O00571	O00571	DDX3X	ATP-dependent RNA helicase DDX3X	>sp|O00571|DDX3X_HUMAN ATP-dependent RNA helicase DDX3X OS=Homo sapiens GN=DDX3X PE=1 SV=3;>sp|O00571-2|DDX3X_HUMAN Isoform 2 of ATP-dependent RNA helicase DDX3X OS=Homo sapiens GN=DDX3X	MULTI-MSMS		JACB153_1	MDA-MB-231 R10K8	650.37	2	646.366	1290.72	43935.3	-0.21888	-0.0090823	-0.22796	646.367	650.374	76.279	29.426	0.75743	76.279	75.978	76.735	-7.6294e-06		0	0	0	6.4234e-05	2	26589	140.14	131.74	1	35.752	1.0344	0
LWDLTTGTTTR	11	0	1	Unmodified	_LWDLTTGTTTR_			0	0	P63244;J3KPE3;H0Y8W2;H0YAF8;D6RHH4;D6R9L0;D6R9Z1;D6RFX4;D6RFZ9;E9PD14;D6RAU2	P63244	P63244	GNB2L1	Guanine nucleotide-binding protein subunit beta-2-like 1	>sp|P63244|GBLP_HUMAN Guanine nucleotide-binding protein subunit beta-2-like 1 OS=Homo sapiens GN=GNB2L1 PE=1 SV=3;>tr|J3KPE3|J3KPE3_HUMAN Guanine nucleotide-binding protein subunit beta-2-like 1 OS=Homo sapiens GN=GNB2L1 PE=1 SV=1;>tr|H0Y8W2|H0Y8W2_HUMAN	MULTI-MSMS		JACB153_1	MDA-MB-231 R10K8	637.83	2	632.83	1263.65	44076	-0.37005	-0.061512	-0.43156	632.83	637.834	45.171	19.056	0.73316	45.171	44.763	45.496	0		0	0	0	0.00035124	1	15299	132.76	118.2	1	36.508	4.7396	0
VNQAIWLLCTGAR	13	0	1	Unmodified	_VNQAIWLLCTGAR_			0	0	P46782;M0R0F0;M0R0R2;M0QZN2	P46782	P46782	RPS5	40S ribosomal protein S5;40S ribosomal protein S5, N-terminally processed	>sp|P46782|RS5_HUMAN 40S ribosomal protein S5 OS=Homo sapiens GN=RPS5 PE=1 SV=4;>tr|M0R0F0|M0R0F0_HUMAN 40S ribosomal protein S5 (Fragment) OS=Homo sapiens GN=RPS5 PE=1 SV=1;>tr|M0R0R2|M0R0R2_HUMAN 40S ribosomal protein S5 OS=Homo sapiens GN=RPS5 PE=1 SV=1	MULTI-MSMS		JACB153_1	MDA-MB-231 R10K8	756.41	2	751.401	1500.79	39998.7	-0.53418	0.53377	-0.00040542	751.401	756.406	56.678	22.892	0.69268	56.678	56.312	57.004	0		0	0	0	1.085e-06	1	19551	170.18	170.18	1	36.601	4.7517	0
VDVDVPDVNIEGPDAK	16	1	0	Unmodified	_VDVDVPDVNIEGPDAK_			0	0	Q09666	Q09666	Q09666	AHNAK	Neuroblast differentiation-associated protein AHNAK	>sp|Q09666|AHNK_HUMAN Neuroblast differentiation-associated protein AHNAK OS=Homo sapiens GN=AHNAK PE=1 SV=2	MULTI-MSMS		JACB153_1	MDA-MB-231 R10K8	845.42	2	841.418	1680.82	37786.4	-0.38964	-0.43317	-0.82281	841.917	845.424	50.027	20.68	0.64106	50.027	49.842	50.483	0		0	0	0	8.0554e-06	1	17085	107.82	107.82	1	36.759	0.689	0
AGTVVLDDVELR	12	0	1	Acetyl (Protein N-term)	_(ac)AGTVVLDDVELR_			1	0	B4DWW4;P25205	B4DWW4	B4DWW4	MCM3	DNA replication licensing factor MCM3	>tr|B4DWW4|B4DWW4_HUMAN DNA replication licensing factor MCM3 OS=Homo sapiens GN=MCM3 PE=1 SV=1;>sp|P25205|MCM3_HUMAN DNA replication licensing factor MCM3 OS=Homo sapiens GN=MCM3 PE=1 SV=3	MULTI-MSMS		JACB153_1	MDA-MB-231 R10K8	669.86	2	664.856	1327.7	43047.8	-0.46901	0.4886	0.019584	665.358	669.861	69.001	27.001	0.39543	69.001	68.832	69.227	0		0	0	0	0.00013384	1	24028	116.54	101.15	1	37.096	4.816	0
DFTVSAMHGDMDQK	14	1	0	Unmodified	_DFTVSAMHGDMDQK_			0	0	P60842;P60842-2;J3KT12;J3KSZ0;J3QL52	P60842	P60842	EIF4A1	Eukaryotic initiation factor 4A-I	>sp|P60842|IF4A1_HUMAN Eukaryotic initiation factor 4A-I OS=Homo sapiens GN=EIF4A1 PE=1 SV=1;>sp|P60842-2|IF4A1_HUMAN Isoform 2 of Eukaryotic initiation factor 4A-I OS=Homo sapiens GN=EIF4A1;>tr|J3KT12|J3KT12_HUMAN Eukaryotic initiation factor 4A-I OS=Homo	MULTI-MSMS		JACB153_1	MDA-MB-231 R10K8	530.57	3	527.894	1580.66	47121.9	0.066715	-0.85705	-0.79033	527.893	530.565	34.632	15.544	0.4923	34.632	34.375	34.867	0		0	0	0	0.002438	1	11066	82.651	82.651	1	37.774	0.89744	0
GLSEDTTEETLK	12	1	0	Unmodified	_GLSEDTTEETLK_			0	0	P19338;H7BY16	P19338	P19338	NCL	Nucleolin	>sp|P19338|NUCL_HUMAN Nucleolin OS=Homo sapiens GN=NCL PE=1 SV=3;>tr|H7BY16|H7BY16_HUMAN Nucleolin (Fragment) OS=Homo sapiens GN=NCL PE=1 SV=2	MULTI-MSMS		JACB153_1	MDA-MB-231 R10K8	665.83	2	661.82	1321.62	43611.1	-0.4832	-0.059618	-0.54281	661.82	665.827	27.115	13.036	0.49888	27.115	26.939	27.438	1.9073e-06		0	0	0	2.0416e-05	1	8038	151.98	151.98	1	39.358	0.79259	0
IWDLEGK	7	1	0	Unmodified	_IWDLEGK_			0	0	P63244;J3KPE3;D6RAC2;H0Y8W2;H0YAF8;D6REE5;H0YAM7;D6RF23;H0Y9P0	P63244	P63244	GNB2L1	Guanine nucleotide-binding protein subunit beta-2-like 1	>sp|P63244|GBLP_HUMAN Guanine nucleotide-binding protein subunit beta-2-like 1 OS=Homo sapiens GN=GNB2L1 PE=1 SV=3;>tr|J3KPE3|J3KPE3_HUMAN Guanine nucleotide-binding protein subunit beta-2-like 1 OS=Homo sapiens GN=GNB2L1 PE=1 SV=1;>tr|D6RAC2|D6RAC2_HUMAN	MULTI-MSMS		JACB153_1	MDA-MB-231 R10K8	434.74	2	430.729	859.444	52729	-0.05722	-0.095537	-0.15276	430.73	434.736	38.927	16.972	0.61857	38.927	38.655	39.273	0		0	0	0	0.013125	1	12792	79.469	8.1729	1	40.074	0.87468	0
VEILANDQGNR	11	0	1	Unmodified	_VEILANDQGNR_			0	0	P17066;P48741	P17066	P17066	HSPA6;HSPA7	Heat shock 70 kDa protein 6;Putative heat shock 70 kDa protein 7	>sp|P17066|HSP76_HUMAN Heat shock 70 kDa protein 6 OS=Homo sapiens GN=HSPA6 PE=1 SV=2;>sp|P48741|HSP77_HUMAN Putative heat shock 70 kDa protein 7 OS=Homo sapiens GN=HSPA7 PE=5 SV=2	MULTI-MSMS		JACB153_1	MDA-MB-231 R10K8	619.82	2	614.818	1227.62	44181	-0.49527	-0.036669	-0.53194	614.817	619.822	24.362	12.118	0.50236	24.362	24.109	24.611	1.9073e-06		0	0	0	5.4534e-09	1	6927	190.57	0	1	40.225	5.2222	0
STLTDSLVCK	10	1	0	Unmodified	_STLTDSLVCK_			0	0	P13639	P13639	P13639	EEF2	Elongation factor 2	>sp|P13639|EF2_HUMAN Elongation factor 2 OS=Homo sapiens GN=EEF2 PE=1 SV=4	MULTI-MSMS		JACB153_1	MDA-MB-231 R10K8	566.29	2	562.287	1122.56	46208.9	-0.27237	0.14653	-0.12584	562.785	566.294	33.92	15.308	0.43287	33.92	33.743	34.176	0		0	0	0	0.00049734	1	10777	137.98	137.98	1	40.287	0.68363	0
YLIANATNPESK	12	1	0	Unmodified	_YLIANATNPESK_			0	0	P27348;E9PG15	P27348	P27348	YWHAQ	14-3-3 protein theta	>sp|P27348|1433T_HUMAN 14-3-3 protein theta OS=Homo sapiens GN=YWHAQ PE=1 SV=1;>tr|E9PG15|E9PG15_HUMAN 14-3-3 protein theta (Fragment) OS=Homo sapiens GN=YWHAQ PE=1 SV=1	MULTI-MSMS		JACB153_1	MDA-MB-231 R10K8	664.85	2	660.843	1319.67	43225	-0.52075	0.13434	-0.38641	661.344	664.851	30.028	14.012	0.48947	30.028	29.786	30.275	-1.9073e-06		0	0	0	5.0043e-05	1	9202	143.97	121.93	1	40.588	0.83632	0
HELQANCYEEVKDR	14	1	1	Unmodified	_HELQANCYEEVKDR_			0	0	E9PK25;P23528;G3V1A4;E9PP50	E9PK25	E9PK25	CFL1	Cofilin-1	>tr|E9PK25|E9PK25_HUMAN Cofilin-1 OS=Homo sapiens GN=CFL1 PE=1 SV=1;>sp|P23528|COF1_HUMAN Cofilin-1 OS=Homo sapiens GN=CFL1 PE=1 SV=3;>tr|G3V1A4|G3V1A4_HUMAN Cofilin 1 (Non-muscle), isoform CRA_a OS=Homo sapiens GN=CFL1 PE=1 SV=1;>tr|E9PP50|E9PP50_HUMAN Co	MULTI-MSMS		JACB153_1	MDA-MB-231 R10K8	453.22	4	448.459	1789.81	48038.6	0.011156	0.50429	0.51545	448.71	452.964	18.51	10.17	0.72937	18.51	18.22	18.949	0		0	0	0	0.0024132	1	4673	89.507	83.475	1	40.941	60.336	0
VWQVTIGTR	9	0	1	Unmodified	_VWQVTIGTR_			0	0	P63244;J3KPE3;D6RAC2;H0YAF8;D6RHH4;H0Y8R5;D6RF23;D6RHJ5	P63244	P63244	GNB2L1	Guanine nucleotide-binding protein subunit beta-2-like 1	>sp|P63244|GBLP_HUMAN Guanine nucleotide-binding protein subunit beta-2-like 1 OS=Homo sapiens GN=GNB2L1 PE=1 SV=3;>tr|J3KPE3|J3KPE3_HUMAN Guanine nucleotide-binding protein subunit beta-2-like 1 OS=Homo sapiens GN=GNB2L1 PE=1 SV=1;>tr|D6RAC2|D6RAC2_HUMAN	MULTI-MSMS		JACB153_1	MDA-MB-231 R10K8	535.31	2	530.301	1058.59	48775.2	0.25836	0.27598	0.53435	530.3	535.305	41.021	17.678	0.60886	41.021	40.777	41.386	0		0	0	0	0.0016795	1	13617	91.867	25.175	1	41.225	5.3519	0
ACYGVLR	7	0	1	Unmodified	_ACYGVLR_			0	0	P23396;P23396-2;E9PL09;H0YEU2	P23396	P23396	RPS3	40S ribosomal protein S3	>sp|P23396|RS3_HUMAN 40S ribosomal protein S3 OS=Homo sapiens GN=RPS3 PE=1 SV=2;>sp|P23396-2|RS3_HUMAN Isoform 2 of 40S ribosomal protein S3 OS=Homo sapiens GN=RPS3;>tr|E9PL09|E9PL09_HUMAN 40S ribosomal protein S3 OS=Homo sapiens GN=RPS3 PE=1 SV=1;>tr|H0YE	MULTI-MSMS		JACB153_1	MDA-MB-231 R10K8	424.72	2	419.716	837.417	53244.1	0.15505	-0.96884	-0.81379	419.714	424.719	19.247	10.415	0.39204	19.247	19.061	19.453	-1.9073e-06		0	0	0	0.099962	1	4974	33.738	33.738	1	41.277	5.3587	0
VAPAPAVVK	9	1	0	Unmodified	_VAPAPAVVK_			0	0	P62424;Q5T8U3	P62424	P62424	RPL7A	60S ribosomal protein L7a	>sp|P62424|RL7A_HUMAN 60S ribosomal protein L7a OS=Homo sapiens GN=RPL7A PE=1 SV=2;>tr|Q5T8U3|Q5T8U3_HUMAN 60S ribosomal protein L7a (Fragment) OS=Homo sapiens GN=RPL7A PE=1 SV=1	MULTI-MSMS		JACB153_1	MDA-MB-231 R10K8	430.28	2	426.271	850.528	53275.2	-0.26809	0.20664	-0.061458	426.271	430.278	20.777	10.93	0.44061	20.777	20.582	21.023	0		0	0	0	0.0049751	1	5547	80.438	50.271	1	41.807	1.2526	0
LEDLIVK	7	1	0	Unmodified	_LEDLIVK_			0	0	P24752;H0YEL7	P24752	P24752	ACAT1	Acetyl-CoA acetyltransferase, mitochondrial	>sp|P24752|THIL_HUMAN Acetyl-CoA acetyltransferase, mitochondrial OS=Homo sapiens GN=ACAT1 PE=1 SV=1;>tr|H0YEL7|H0YEL7_HUMAN Acetyl-CoA acetyltransferase, mitochondrial (Fragment) OS=Homo sapiens GN=ACAT1 PE=1 SV=1	MULTI-MSMS		JACB153_1	MDA-MB-231 R10K8	419.26	2	415.255	828.496	54243.7	-0.11771	-0.55219	-0.66989	415.256	419.262	34.63	15.544	0.67177	34.63	34.291	34.963	0		0	0	0	0.0070427	1	11027	104.45	39.644	1	42.075	0.99911	0
PGGYGYGYGR	10	0	1	Unmodified	_PGGYGYGYGR_			0	0	P98179	P98179	P98179	RBM3	Putative RNA-binding protein 3	>sp|P98179|RBM3_HUMAN Putative RNA-binding protein 3 OS=Homo sapiens GN=RBM3 PE=1 SV=1	MULTI-MSMS		JACB153_1	MDA-MB-231 R10K8	528.74	2	523.738	1045.46	49180.8	0.14133	0.31094	0.45227	523.737	528.742	24.506	12.172	0.45133	24.506	24.288	24.74	0		0	0	0	0.0012063	1	7026	96.331	57.183	1	42.294	5.4907	0
FASFIDK	7	1	0	Unmodified	_FASFIDK_			0	0	CON__Q3KNV1;P08729;CON__P08729;CON__Q9DCV7;CON__Q6ISB0;CON__Q9NSB2;Q9NSB2;CON__P19013;P19013;CON__Q6IME9;CON__Q14CN4-1;Q14CN4;Q14CN4-2;F5H8K9;Q14CN4-3;CON__P35908;P35908;CON__Q7Z794;Q7Z794;CON__Q6NXH9;CON__Q9R0H5;CON__Q3TTY5;CON__Q01546;Q01546;CON__P12035;J3QST3;P12035;F8W1S1;CON__Q32MB2;Q86Y46;CON__Q7RTS7;Q7RTS7;CON__P07744;CON__Q3SY84;Q3SY84;Q86Y46-2;F8VS61;H0YHD9;P05787-2;CON__P05787;P05787;F8…	CON__Q3KNV1;CON__P35908;P05787-2	P05787-2	KRT7;KRT84;KRT4;KRT72;KRT2;KRT77;KRT76;KRT3;KRT74;KRT73;KRT71;KRT8	Keratin, type II cytoskeletal 7;Keratin, type II cuticular Hb4;Keratin, type II cytoskeletal 4;Keratin, type II cytoskeletal 72;Keratin, type II cytoskeletal 2 epidermal;Keratin, type II cytoskeletal 1b;Keratin, type II cytoskeletal 2 oral;Keratin, type II cytoskeletal 3;Keratin, type II cytoskeletal 73;Keratin, type II cytoskeletal 74;Keratin, type II cytoskeletal 71;Keratin, type II cytoskeleta…	>Q3KNV1 TREMBL:Q3KNV1;Q96GE1 Tax_Id=9606 Gene_Symbol=KRT7 keratin 7;>sp|P08729|K2C7_HUMAN Keratin, type II cytoskeletal 7 OS=Homo sapiens GN=KRT7 PE=1 SV=5;>P08729 SWISS-PROT:P08729 Tax_Id=9606 Gene_Symbol=KRT7 Keratin, type II cytoskeletal 7;>Q9DCV7 SWISS	MULTI-MSMS		JACB153_1	MDA-MB-231 R10K8	418.23	2	414.219	826.423	54284	0.29588	0.4175	0.71338	414.218	418.226	35.252	15.748	1.0623	35.252	34.917	35.979	0		0	0	0	0.0067359	1	11327	113.7	24.146	1	42.509	0.56115	0
EGDLLFTVAK	10	1	0	Unmodified	_EGDLLFTVAK_			0	0	Q13347;Q5TFK1	Q13347	Q13347	EIF3I	Eukaryotic translation initiation factor 3 subunit I	>sp|Q13347|EIF3I_HUMAN Eukaryotic translation initiation factor 3 subunit I OS=Homo sapiens GN=EIF3I PE=1 SV=1;>tr|Q5TFK1|Q5TFK1_HUMAN Eukaryotic translation initiation factor 3 subunit I (Fragment) OS=Homo sapiens GN=EIF3I PE=1 SV=1	MULTI-MSMS		JACB153_1	MDA-MB-231 R10K8	550.81	2	546.8	1091.59	49593.5	0.22718	0.31685	0.54404	546.802	550.808	50.25	20.753	0.40924	50.25	50.044	50.453	0		0	0	0	0.0079581	1	17172	70.942	54.688	1	42.546	1.2407	0
LLLLGAGESGK	11	1	0	Unmodified	_LLLLGAGESGK_			0	0	Q5JWF2;Q5JWF2-2;P63092-4;P63092;P63092-2;P63092-3;H0Y7F4;P38405-2;P38405;Q5JWE9;A8MTJ3;P09471;P19087;P11488;H0Y7E8;Q5JWD1;A2A2R6;P04899-4;P04899;P09471-2;P63096;P08754	Q5JWF2;P04899-4;P08754	Q5JWF2	GNAS;GNAL;GNAT3;GNAO1;GNAT2;GNAT1;GNAI2;GNAI1;GNAI3	Guanine nucleotide-binding protein G(s) subunit alpha isoforms XLas;Guanine nucleotide-binding protein G(s) subunit alpha isoforms short;Guanine nucleotide-binding protein G(olf) subunit alpha;Guanine nucleotide-binding protein G(t) subunit alpha-3;Guanine nucleotide-binding protein G(o) subunit alpha;Guanine nucleotide-binding protein G(t) subunit alpha-2;Guanine nucleotide-binding protein G(t) …	>sp|Q5JWF2|GNAS1_HUMAN Guanine nucleotide-binding protein G(s) subunit alpha isoforms XLas OS=Homo sapiens GN=GNAS PE=1 SV=2;>sp|Q5JWF2-2|GNAS1_HUMAN Isoform XLas-2 of Guanine nucleotide-binding protein G(s) subunit alpha isoforms XLas OS=Homo sapiens GN=G	MULTI-MSMS		JACB153_1	MDA-MB-231 R10K8	533.32	2	529.316	1056.62	48194.6	0.34609	-0.47073	-0.12464	529.316	533.323	42.443	18.145	0.58454	42.443	42.224	42.808	0		0	0	0	0.0039895	1	14185	86.313	0	1	42.762	1.0047	0
DQIYDIFQK	9	1	0	Unmodified	_DQIYDIFQK_			0	0	P60842;P60842-2;J3KT12;J3QS69;J3KTB5;J3QL43;J3QR64;J3KSZ0;J3KTN0	P60842	P60842	EIF4A1	Eukaryotic initiation factor 4A-I	>sp|P60842|IF4A1_HUMAN Eukaryotic initiation factor 4A-I OS=Homo sapiens GN=EIF4A1 PE=1 SV=1;>sp|P60842-2|IF4A1_HUMAN Isoform 2 of Eukaryotic initiation factor 4A-I OS=Homo sapiens GN=EIF4A1;>tr|J3KT12|J3KT12_HUMAN Eukaryotic initiation factor 4A-I OS=Homo	MULTI-MSMS		JACB153_1	MDA-MB-231 R10K8	589.3	2	585.295	1168.58	45413.6	0.03099	0.26362	0.29461	585.797	589.303	55.439	22.483	0.58239	55.439	55.224	55.807	0		0	0	0	0.00037638	1	19102	138.06	106.64	1	42.771	0.86216	0
NSNPALNDNLEK	12	1	0	Unmodified	_NSNPALNDNLEK_			0	0	O00299	O00299	O00299	CLIC1	Chloride intracellular channel protein 1	>sp|O00299|CLIC1_HUMAN Chloride intracellular channel protein 1 OS=Homo sapiens GN=CLIC1 PE=1 SV=4	MULTI-MSMS		JACB153_1	MDA-MB-231 R10K8	668.83	2	664.826	1327.64	42300.8	-0.67817	0.0087196	-0.66945	664.825	668.833	24.246	12.079	0.59253	24.246	24.019	24.611	0		0	0	0	0.00023182	2	6935	110.31	103.29	1	42.883	0.84774	0
SGVSLAALK	9	1	0	Unmodified	_SGVSLAALK_			0	0	P16402;P10412;P16403	P16402;P10412;P16403	P16402	HIST1H1D;HIST1H1E;HIST1H1C	Histone H1.3;Histone H1.4;Histone H1.2	>sp|P16402|H13_HUMAN Histone H1.3 OS=Homo sapiens GN=HIST1H1D PE=1 SV=2;>sp|P10412|H14_HUMAN Histone H1.4 OS=Homo sapiens GN=HIST1H1E PE=1 SV=2;>sp|P16403|H12_HUMAN Histone H1.2 OS=Homo sapiens GN=HIST1H1C PE=1 SV=2	MULTI-MSMS		JACB153_1	MDA-MB-231 R10K8	427.27	2	423.258	844.502	53058	-0.22691	0.16874	-0.058177	423.259	427.265	33.675	15.226	0.54444	33.675	33.448	33.992	0		0	0	0	0.0093816	2	10657	65.157	41.729	1	43.189	0.3847	0
DLLDLLVEAK	10	1	0	Unmodified	_DLLDLLVEAK_			0	0	O00571;O00571-2;O15523;B4DXX7	O00571	O00571	DDX3X;DDX3Y	ATP-dependent RNA helicase DDX3X;ATP-dependent RNA helicase DDX3Y	>sp|O00571|DDX3X_HUMAN ATP-dependent RNA helicase DDX3X OS=Homo sapiens GN=DDX3X PE=1 SV=3;>sp|O00571-2|DDX3X_HUMAN Isoform 2 of ATP-dependent RNA helicase DDX3X OS=Homo sapiens GN=DDX3X;>sp|O15523|DDX3Y_HUMAN ATP-dependent RNA helicase DDX3Y OS=Homo sapie	MULTI-MSMS		JACB153_1	MDA-MB-231 R10K8	568.84	2	564.829	1127.64	46365.7	0.28377	0.0010541	0.28483	564.829	568.836	80.634	30.878	0.79031	80.634	80.36	81.15	0		0	0	0	0.001229	3	28119	94.616	94.616	1	43.933	1.3917	0
DFMIQGGDFTR	11	0	1	Unmodified	_DFMIQGGDFTR_			0	0	P23284	P23284	P23284	PPIB	Peptidyl-prolyl cis-trans isomerase B	>sp|P23284|PPIB_HUMAN Peptidyl-prolyl cis-trans isomerase B OS=Homo sapiens GN=PPIB PE=1 SV=2	MULTI-MSMS		JACB153_1	MDA-MB-231 R10K8	648.8	2	643.795	1285.58	43692.6	-0.37137	-0.54123	-0.9126	644.296	648.8	52.225	21.406	0.60449	52.225	52.029	52.634	3.8147e-06		0	0	0	0.0071387	1	17925	78.903	73.439	1	44.419	5.7666	0
INISEGNCPER	11	0	1	Unmodified	_INISEGNCPER_			0	0	Q15366-6;Q15366;H3BRU6;B4DLC0;B4DXP5;F8VXH9;F8W0G4;F8W1G6;P57721;P57721-4;E9PFP8;P57721-5;P57721-3;P57721-2;J3QT27;F8VTZ0;Q15366-3;Q15366-2;Q15366-4;Q15366-5;F8VZX2;Q15366-7;Q15365	Q15366-6;Q15366-3;Q15365	Q15365	PCBP2;PCBP3;PCBP1	Poly(rC)-binding protein 2;Poly(rC)-binding protein 3;Poly(rC)-binding protein 1	>sp|Q15366-6|PCBP2_HUMAN Isoform 6 of Poly(rC)-binding protein 2 OS=Homo sapiens GN=PCBP2;>sp|Q15366|PCBP2_HUMAN Poly(rC)-binding protein 2 OS=Homo sapiens GN=PCBP2 PE=1 SV=1;>tr|H3BRU6|H3BRU6_HUMAN Poly(rC)-binding protein 2 (Fragment) OS=Homo sapiens GN=	MULTI-MSMS		JACB153_1	MDA-MB-231 R10K8	649.8	2	644.801	1287.59	43083	-0.7225	-0.37765	-1.1001	644.801	649.805	22.948	11.647	0.3964	22.948	22.79	23.187	0		0	0	0	0.0001941	1	6380	143.79	143.79	1	44.651	5.7967	0
ALAAAGYDVEK	11	1	0	Unmodified	_ALAAAGYDVEK_			0	0	P16402;Q02539;P22492;P10412;P16403	P16402;P10412;P16403	P16402	HIST1H1D;HIST1H1A;HIST1H1T;HIST1H1E;HIST1H1C	Histone H1.3;Histone H1.1;Histone H1t;Histone H1.4;Histone H1.2	>sp|P16402|H13_HUMAN Histone H1.3 OS=Homo sapiens GN=HIST1H1D PE=1 SV=2;>sp|Q02539|H11_HUMAN Histone H1.1 OS=Homo sapiens GN=HIST1H1A PE=1 SV=3;>sp|P22492|H1T_HUMAN Histone H1t OS=Homo sapiens GN=HIST1H1T PE=2 SV=4;>sp|P10412|H14_HUMAN Histone H1.4 OS=Homo	MULTI-MSMS		JACB153_1	MDA-MB-231 R10K8	554.29	2	554.288	1106.56	46364.3	-0.32961	0.53783	0.20822	554.288	558.295	27.841	13.281	1.0087	27.841	27.6	28.609	-1.9073e-06		0	0	0	0.00072261	2	8356	99.522	70.564	1	44.757	0.43253	0
IYFMAGSSR	9	0	1	Unmodified	_IYFMAGSSR_			0	0	P14625	P14625	P14625	HSP90B1	Endoplasmin	>sp|P14625|ENPL_HUMAN Endoplasmin OS=Homo sapiens GN=HSP90B1 PE=1 SV=1	MULTI-MSMS		JACB153_1	MDA-MB-231 R10K8	521.26	2	516.253	1030.49	47881	0.29154	-0.329	-0.037464	516.252	521.257	36.003	16.002	0.658	36.003	35.736	36.394	0		0	0	0	0.0043387	1	11630	82.645	82.645	1	44.887	5.8273	0
ILQEHEQIK	9	1	0	Unmodified	_ILQEHEQIK_			0	0	Q14152;F5H335	Q14152	Q14152	EIF3A	Eukaryotic translation initiation factor 3 subunit A	>sp|Q14152|EIF3A_HUMAN Eukaryotic translation initiation factor 3 subunit A OS=Homo sapiens GN=EIF3A PE=1 SV=1;>tr|F5H335|F5H335_HUMAN Eukaryotic translation initiation factor 3 subunit A OS=Homo sapiens GN=EIF3A PE=1 SV=1	MULTI-MSMS		JACB153_1	MDA-MB-231 R10K8	382.55	3	379.88	1136.62	57548.8	-0.024809	-0.14279	-0.1676	379.88	382.552	15.739	9.2483	0.68083	15.739	15.446	16.126	0		0	0	0	0.0024832	1	3696	89.08	62.407	1	45.654	1.8558	0
LATQLTGPVMPVR	13	0	1	Unmodified	_LATQLTGPVMPVR_			0	0	P26373;P26373-2	P26373	P26373	RPL13	60S ribosomal protein L13	>sp|P26373|RL13_HUMAN 60S ribosomal protein L13 OS=Homo sapiens GN=RPL13 PE=1 SV=4;>sp|P26373-2|RL13_HUMAN Isoform 2 of 60S ribosomal protein L13 OS=Homo sapiens GN=RPL13	MULTI-MSMS		JACB153_1	MDA-MB-231 R10K8	696.9	2	691.895	1381.78	42541.1	-0.36609	-0.35723	-0.72332	691.895	696.899	45.201	19.069	0.47703	45.201	45.019	45.496	0		0	0	0	2.8903e-08	1	15254	187.44	187.44	1	45.716	5.935	0
LFQECCPHSTDR	12	0	1	Unmodified	_LFQECCPHSTDR_			0	0	P61978-3;Q5T6W5;Q5T6W2;P61978-2;P61978;Q5T6W1	P61978-3;P61978-2	P61978-2	HNRNPK	Heterogeneous nuclear ribonucleoprotein K	>sp|P61978-3|HNRPK_HUMAN Isoform 3 of Heterogeneous nuclear ribonucleoprotein K OS=Homo sapiens GN=HNRNPK;>tr|Q5T6W5|Q5T6W5_HUMAN Heterogeneous nuclear ribonucleoprotein K OS=Homo sapiens GN=HNRNPK PE=1 SV=1;>tr|Q5T6W2|Q5T6W2_HUMAN Heterogeneous nuclear ri	MULTI-MSMS		JACB153_1	MDA-MB-231 R10K8	520.56	3	517.222	1548.64	47754.3	0.48001	-0.742	-0.26199	517.222	520.558	19.304	10.434	0.57815	19.304	19.061	19.639	0		0	0	0	5.837e-05	1	4991	141.73	139.09	1	45.774	5.9425	0
FFEVILIDPFHK	12	1	0	Unmodified	_FFEVILIDPFHK_			0	0	P61313;E7EQV9;E7ENU7	P61313	P61313	RPL15	60S ribosomal protein L15;Ribosomal protein L15	>sp|P61313|RL15_HUMAN 60S ribosomal protein L15 OS=Homo sapiens GN=RPL15 PE=1 SV=2;>tr|E7EQV9|E7EQV9_HUMAN Ribosomal protein L15 (Fragment) OS=Homo sapiens GN=RPL15 PE=1 SV=1;>tr|E7ENU7|E7ENU7_HUMAN Ribosomal protein L15 (Fragment) OS=Homo sapiens GN=RPL15	MULTI-MSMS		JACB153_1	MDA-MB-231 R10K8	504.95	3	502.278	1503.81	49160.3	0.37566	0.097715	0.47337	502.612	504.949	71.906	27.965	0.52298	71.906	71.669	72.192	7.6294e-06		0	0	0	0.0047116	1	25043	85.845	85.845	1	46.169	1.568	0
HLYTLDGGDIINALCFSPNR	20	0	1	Unmodified	_HLYTLDGGDIINALCFSPNR_			0	0	P63244;J3KPE3;D6RAC2;H0Y8W2;H0YAF8;D6REE5;H0YAM7;D6R9L0;D6R9Z1;H0Y8R5;D6RF23	P63244	P63244	GNB2L1	Guanine nucleotide-binding protein subunit beta-2-like 1	>sp|P63244|GBLP_HUMAN Guanine nucleotide-binding protein subunit beta-2-like 1 OS=Homo sapiens GN=GNB2L1 PE=1 SV=3;>tr|J3KPE3|J3KPE3_HUMAN Guanine nucleotide-binding protein subunit beta-2-like 1 OS=Homo sapiens GN=GNB2L1 PE=1 SV=1;>tr|D6RAC2|D6RAC2_HUMAN	MULTI-MSMS		JACB153_1	MDA-MB-231 R10K8	763.05	3	759.376	2275.11	40444.9	-0.41786	-0.34628	-0.76413	759.375	763.046	65.983	25.99	0.66201	65.983	65.753	66.415	0		0	0	0	6.1921e-17	2	22903	206.8	206.8	1	46.327	6.0144	0
EQLEEEEEAK	10	1	0	Unmodified	_EQLEEEEEAK_			0	0	P35579	P35579	P35579	MYH9	Myosin-9	>sp|P35579|MYH9_HUMAN Myosin-9 OS=Homo sapiens GN=MYH9 PE=1 SV=4	MULTI-MSMS		JACB153_1	MDA-MB-231 R10K8	621.28	2	617.278	1232.54	44333	-0.74761	0.20778	-0.53982	617.278	621.285	17.572	9.8586	0.41682	17.572	17.431	17.847	1.9073e-06		0	0	0	0.0011019	1	4379	104.22	104.22	1	46.4	1.56	0
LTEGCSFR	8	0	1	Unmodified	_LTEGCSFR_			0	0	P42677;C9J1C5;H0YMV8;Q71UM5	P42677;H0YMV8	P42677	RPS27;RPS27L	40S ribosomal protein S27;40S ribosomal protein S27-like	>sp|P42677|RS27_HUMAN 40S ribosomal protein S27 OS=Homo sapiens GN=RPS27 PE=1 SV=3;>tr|C9J1C5|C9J1C5_HUMAN 40S ribosomal protein S27 OS=Homo sapiens GN=RPS27L PE=3 SV=1;>tr|H0YMV8|H0YMV8_HUMAN 40S ribosomal protein S27 OS=Homo sapiens GN=RPS27L PE=1 SV=1;>	MULTI-MSMS		JACB153_1	MDA-MB-231 R10K8	490.23	2	485.227	968.439	48736	-0.067363	-0.77634	-0.8437	485.227	490.231	20.933	10.974	0.51258	20.933	20.679	21.192	0		0	0	0	0.0013368	1	5597	136.75	112.53	1	47.036	6.1063	0
TDLLLEPYNK	10	1	0	Unmodified	_TDLLLEPYNK_			0	0	P35579;P35579-2	P35579	P35579	MYH9	Myosin-9	>sp|P35579|MYH9_HUMAN Myosin-9 OS=Homo sapiens GN=MYH9 PE=1 SV=4;>sp|P35579-2|MYH9_HUMAN Isoform 2 of Myosin-9 OS=Homo sapiens GN=MYH9	MULTI-MSMS		JACB153_1	MDA-MB-231 R10K8	607.33	2	603.324	1204.63	45369	-0.28074	0.37716	0.096421	603.325	607.332	45.16	19.056	0.6412	45.16	44.916	45.557	0		0	0	0	0.00092606	1	15215	117.52	116.2	1	47.119	0.97595	0
TLINELVK	8	1	0	Unmodified	_TLINELVK_			0	0	Q14204	Q14204	Q14204	DYNC1H1	Cytoplasmic dynein 1 heavy chain 1	>sp|Q14204|DYHC1_HUMAN Cytoplasmic dynein 1 heavy chain 1 OS=Homo sapiens GN=DYNC1H1 PE=1 SV=5	MULTI-MSMS		JACB153_1	MDA-MB-231 R10K8	469.29	2	465.287	928.559	50973.3	0.25246	0.94064	1.1931	465.286	469.294	43.556	18.518	0.47732	43.556	43.345	43.823	0		0	0	0	0.002512	1	14622	100.02	8.9485	1	47.248	1.54	0
VTIAQGGVLPNIQAVLLPK	19	1	0	Unmodified	_VTIAQGGVLPNIQAVLLPK_			0	0	P04908;P0C0S8;P20671;Q6FI13;Q7L7L0;Q93077;Q16777;Q9BTM1;Q96KK5;Q99878;H0YFX9	P04908	P04908	HIST1H2AB;HIST1H2AG;HIST1H2AD;HIST2H2AA3;HIST3H2A;HIST1H2AC;HIST2H2AC;H2AFJ;HIST1H2AH;HIST1H2AJ	Histone H2A type 1-B/E;Histone H2A type 1;Histone H2A type 1-D;Histone H2A type 2-A;Histone H2A type 3;Histone H2A type 1-C;Histone H2A type 2-C;Histone H2A.J;Histone H2A type 1-H;Histone H2A type 1-J;Histone H2A	>sp|P04908|H2A1B_HUMAN Histone H2A type 1-B/E OS=Homo sapiens GN=HIST1H2AB PE=1 SV=2;>sp|P0C0S8|H2A1_HUMAN Histone H2A type 1 OS=Homo sapiens GN=HIST1H2AG PE=1 SV=2;>sp|P20671|H2A1D_HUMAN Histone H2A type 1-D OS=Homo sapiens GN=HIST1H2AD PE=1 SV=2;>sp|Q6FI	MULTI-MSMS		JACB153_1	MDA-MB-231 R10K8	970.6	2	966.088	1930.16	35904.8	-0.41597	-0.11458	-0.53055	966.589	970.596	72.682	28.228	0.60849	72.682	72.382	72.99	0		0	0	0	5.5037e-11	3	25413	140.89	140.89	1	47.286	0.62834	0
ALGQNPTNAEVLK	13	1	0	Unmodified	_ALGQNPTNAEVLK_			0	0	B7Z6Z4;G3V1V0;G8JLA2;J3KND3;P60660;P60660-2;F8W1R7;F8VPF3;P14649;F8W1I5	B7Z6Z4	B7Z6Z4	MYL6;MYL6B	Myosin light polypeptide 6;Myosin light chain 6B	>tr|B7Z6Z4|B7Z6Z4_HUMAN Myosin light polypeptide 6 OS=Homo sapiens GN=MYL6 PE=1 SV=1;>tr|G3V1V0|G3V1V0_HUMAN Myosin light polypeptide 6 OS=Homo sapiens GN=MYL6 PE=1 SV=1;>tr|G8JLA2|G8JLA2_HUMAN Myosin light polypeptide 6 OS=Homo sapiens GN=MYL6 PE=1 SV=1;>	MULTI-MSMS		JACB153_1	MDA-MB-231 R10K8	681.88	2	677.87	1353.73	42502.2	-0.72063	-0.1164	-0.83703	677.87	681.877	29.794	13.933	0.49554	29.794	29.579	30.074	0		0	0	0	0.00014075	1	9118	109.15	109.15	1	47.335	0.80102	0
GLTSVINQK	9	1	0	Unmodified	_GLTSVINQK_			0	0	P07195	P07195	P07195	LDHB	L-lactate dehydrogenase B chain	>sp|P07195|LDHB_HUMAN L-lactate dehydrogenase B chain OS=Homo sapiens GN=LDHB PE=1 SV=2	MULTI-MSMS		JACB153_1	MDA-MB-231 R10K8	484.29	2	480.28	958.545	49304.8	-0.12008	0.42134	0.30126	480.279	484.287	27.582	13.196	0.38972	27.582	27.397	27.786	0		0	0	0	0.00055699	1	8239	128.69	128.69	1	47.683	0.83451	0
SINPDEAVAYGAAVQAAILSGDK	23	1	0	Unmodified	_SINPDEAVAYGAAVQAAILSGDK_			0	0	P11142;E9PKE3;P11142-2;E9PNE6;A8K7Q2	P11142	P11142	HSPA8	Heat shock cognate 71 kDa protein	>sp|P11142|HSP7C_HUMAN Heat shock cognate 71 kDa protein OS=Homo sapiens GN=HSPA8 PE=1 SV=1;>tr|E9PKE3|E9PKE3_HUMAN Heat shock cognate 71 kDa protein OS=Homo sapiens GN=HSPA8 PE=1 SV=1;>sp|P11142-2|HSP7C_HUMAN Isoform 2 of Heat shock cognate 71 kDa protein	MULTI-MSMS		JACB153_1	MDA-MB-231 R10K8	757.06	3	754.053	2259.14	40028.9	-0.34541	-0.045926	-0.39133	754.054	757.059	74.976	28.991	1.3454	74.976	74.583	75.929	0		0	0	0	1.114e-11	2	26215	133.1	133.1	1	47.838	0.80922	0
NIEDVIAQGIGK	12	1	0	Unmodified	_NIEDVIAQGIGK_			0	0	P05387;H0YDD8	P05387	P05387	RPLP2	60S acidic ribosomal protein P2	>sp|P05387|RLA2_HUMAN 60S acidic ribosomal protein P2 OS=Homo sapiens GN=RPLP2 PE=1 SV=1;>tr|H0YDD8|H0YDD8_HUMAN 60S acidic ribosomal protein P2 (Fragment) OS=Homo sapiens GN=RPLP2 PE=1 SV=1	MULTI-MSMS		JACB153_1	MDA-MB-231 R10K8	632.85	2	628.846	1255.68	44079.6	-0.50526	0.27319	-0.23207	628.846	632.853	54.557	22.186	0.6013	54.557	54.239	54.84	-3.8147e-06		0	0	0	0.00016927	2	18754	118.61	89.983	1	47.979	0.6652	0
ASGVAVSDGVIK	12	1	0	Acetyl (Protein N-term)	_(ac)ASGVAVSDGVIK_			1	0	E9PK25;P23528;E9PP50;E9PS23	E9PK25	E9PK25	CFL1	Cofilin-1	>tr|E9PK25|E9PK25_HUMAN Cofilin-1 OS=Homo sapiens GN=CFL1 PE=1 SV=1;>sp|P23528|COF1_HUMAN Cofilin-1 OS=Homo sapiens GN=CFL1 PE=1 SV=3;>tr|E9PP50|E9PP50_HUMAN Cofilin-1 (Fragment) OS=Homo sapiens GN=CFL1 PE=1 SV=2;>tr|E9PS23|E9PS23_HUMAN Cofilin-1 (Fragment	MULTI-MSMS		JACB153_1	MDA-MB-231 R10K8	576.82	2	572.814	1143.61	46702.5	0.27823	-0.27044	0.007789	572.814	576.821	45.966	19.323	0.70452	45.966	45.712	46.417	0		0	0	0	8.8454e-05	2	15542	124.86	110.89	1	48.253	0.4303	0
DFLAGGVAAAISK	13	1	0	Unmodified	_DFLAGGVAAAISK_			0	0	P05141	P05141	P05141	SLC25A5	ADP/ATP translocase 2	>sp|P05141|ADT2_HUMAN ADP/ATP translocase 2 OS=Homo sapiens GN=SLC25A5 PE=1 SV=7	MULTI-MSMS		JACB153_1	MDA-MB-231 R10K8	614.34	2	610.338	1218.66	44906.1	-0.10554	0.042265	-0.063274	610.338	614.345	56.088	22.699	0.95605	56.088	55.776	56.732	0		0	0	0	0.0045687	1	19336	82.102	73.694	1	48.557	0.88518	0
GNPTVEVDLFTSK	13	1	0	Unmodified	_GNPTVEVDLFTSK_			0	0	P06733;K7EM90	P06733	P06733	ENO1	Alpha-enolase	>sp|P06733|ENOA_HUMAN Alpha-enolase OS=Homo sapiens GN=ENO1 PE=1 SV=2;>tr|K7EM90|K7EM90_HUMAN Enolase (Fragment) OS=Homo sapiens GN=ENO1 PE=1 SV=1	MULTI-MSMS		JACB153_1	MDA-MB-231 R10K8	707.87	2	703.862	1405.71	41465.6	-0.065937	0.10604	0.040107	703.863	707.869	49.92	20.64	0.98594	49.92	49.437	50.423	-3.8147e-06		0	0	0	0.00010646	1	17041	116.51	16.288	1	48.617	0.57136	0
GNPTVEVDLYTAK	13	1	0	Unmodified	_GNPTVEVDLYTAK_			0	0	P09104;B7Z2X9;F5H0C8;F5H1C3	P09104	P09104	ENO2	Gamma-enolase;Enolase	>sp|P09104|ENOG_HUMAN Gamma-enolase OS=Homo sapiens GN=ENO2 PE=1 SV=3;>tr|B7Z2X9|B7Z2X9_HUMAN Gamma-enolase OS=Homo sapiens GN=ENO2 PE=1 SV=1;>tr|F5H0C8|F5H0C8_HUMAN Enolase OS=Homo sapiens GN=ENO2 PE=1 SV=1;>tr|F5H1C3|F5H1C3_HUMAN Gamma-enolase (Fragment)	MULTI-MSMS		JACB153_1	MDA-MB-231 R10K8	704.36	2	703.862	1405.71	41465.6	-0.065937	0.10604	0.040107	703.863	707.869	49.92	20.64	0.98594	49.92	49.437	50.423	-3.8147e-06		0	0	0	0.010336	1	17101	66.533	1.4403	1	48.617	0.57136	0
SFYPEEVSSMVLTK	14	1	0	Unmodified	_SFYPEEVSSMVLTK_			0	0	P11142;E9PKE3;P11142-2;E9PN89;E9PLF4;E9PQK7;E9PQQ4;E9PPY6;E9PI65;E9PN25;E9PK54	P11142;E9PK54	P11142	HSPA8	Heat shock cognate 71 kDa protein	>sp|P11142|HSP7C_HUMAN Heat shock cognate 71 kDa protein OS=Homo sapiens GN=HSPA8 PE=1 SV=1;>tr|E9PKE3|E9PKE3_HUMAN Heat shock cognate 71 kDa protein OS=Homo sapiens GN=HSPA8 PE=1 SV=1;>sp|P11142-2|HSP7C_HUMAN Isoform 2 of Heat shock cognate 71 kDa protein	MULTI-MSMS		JACB153_1	MDA-MB-231 R10K8	812.9	2	808.897	1615.78	37927.8	-0.92717	0.27847	-0.64871	809.401	812.905	57.851	23.286	0.68188	57.851	57.559	58.241	0		0	0	0	6.8614e-05	2	19974	98.943	92.527	1	49.039	0.74014	0
FNADEFEDMVAEK	13	1	0	Unmodified	_FNADEFEDMVAEK_			0	0	F8W7C6;P27635;X1WI28	F8W7C6;P27635	F8W7C6	RPL10	60S ribosomal protein L10	>tr|F8W7C6|F8W7C6_HUMAN 60S ribosomal protein L10 OS=Homo sapiens GN=RPL10 PE=1 SV=1;>sp|P27635|RL10_HUMAN 60S ribosomal protein L10 OS=Homo sapiens GN=RPL10 PE=1 SV=4;>tr|X1WI28|X1WI28_HUMAN 60S ribosomal protein L10 (Fragment) OS=Homo sapiens GN=RPL10 PE	MULTI-MSMS		JACB153_1	MDA-MB-231 R10K8	776.84	2	772.832	1543.65	39913	-0.56704	-0.20769	-0.77474	772.832	776.839	55.61	22.537	0.44976	55.61	55.414	55.864	0		0	0	0	1.5079e-06	1	19202	163.27	158.57	1	49.117	1.2153	0
LNLEAINYMAADGDFK	16	1	0	Unmodified	_LNLEAINYMAADGDFK_			0	0	P09382	P09382	P09382	LGALS1	Galectin-1	>sp|P09382|LEG1_HUMAN Galectin-1 OS=Homo sapiens GN=LGALS1 PE=1 SV=2	MULTI-MSMS		JACB153_1	MDA-MB-231 R10K8	897.44	2	892.93	1783.85	37152	-0.50477	-0.63429	-1.1391	893.429	896.937	63.292	25.095	1.393	63.292	62.954	64.347	0		0	0	0	5.1914e-08	3	21916	147.64	147.64	1	49.317	0.79689	0
ISMPDFDLHLK	11	1	0	Unmodified	_ISMPDFDLHLK_			0	0	Q09666	Q09666	Q09666	AHNAK	Neuroblast differentiation-associated protein AHNAK	>sp|Q09666|AHNK_HUMAN Neuroblast differentiation-associated protein AHNAK OS=Homo sapiens GN=AHNAK PE=1 SV=2	MULTI-MSMS		JACB153_1	MDA-MB-231 R10K8	441.9	3	439.229	1314.66	52041.1	-0.083029	-0.10811	-0.19114	439.229	441.9	53.754	21.918	0.48597	53.754	53.542	54.028	0		0	0	0	0.011062	1	18481	69.672	69.672	1	49.383	0.76733	0
ASGPPVSELITK	12	1	0	Unmodified	_ASGPPVSELITK_			0	0	P16402;P10412;P16403	P16402;P10412;P16403	P16402	HIST1H1D;HIST1H1E;HIST1H1C	Histone H1.3;Histone H1.4;Histone H1.2	>sp|P16402|H13_HUMAN Histone H1.3 OS=Homo sapiens GN=HIST1H1D PE=1 SV=2;>sp|P10412|H14_HUMAN Histone H1.4 OS=Homo sapiens GN=HIST1H1E PE=1 SV=2;>sp|P16403|H12_HUMAN Histone H1.2 OS=Homo sapiens GN=HIST1H1C PE=1 SV=2	MULTI-MSMS		JACB153_1	MDA-MB-231 R10K8	603.84	2	599.838	1197.66	45254.9	-0.085947	-0.28645	-0.3724	599.837	603.845	38.341	16.782	1.0007	38.341	37.928	38.928	0		0	0	0	0.0077187	2	12642	80.31	57.392	1	49.505	0.52294	0
FLILPDMLK	9	1	0	Unmodified	_FLILPDMLK_			0	0	P62318;B4DJP7	P62318	P62318	SNRPD3	Small nuclear ribonucleoprotein Sm D3	>sp|P62318|SMD3_HUMAN Small nuclear ribonucleoprotein Sm D3 OS=Homo sapiens GN=SNRPD3 PE=1 SV=1;>tr|B4DJP7|B4DJP7_HUMAN Small nuclear ribonucleoprotein Sm D3 OS=Homo sapiens GN=SNRPD3 PE=1 SV=1	MULTI-MSMS		JACB153_1	MDA-MB-231 R10K8	549.33	2	545.322	1088.63	47857	0.23614	-0.39312	-0.15698	545.323	549.33	68.247	26.75	0.72928	68.247	68.007	68.736	0		0	0	0	0.004442	1	23747	82.287	82.287	1	49.686	1.184	0
VNFAMNVGK	9	1	0	Unmodified	_VNFAMNVGK_			0	0	P14618;P14618-3;P14618-2;Q504U3	P14618;P14618-2	P14618	PKM2	Pyruvate kinase isozymes M1/M2;Pyruvate kinase	>sp|P14618|KPYM_HUMAN Pyruvate kinase PKM OS=Homo sapiens GN=PKM PE=1 SV=4;>sp|P14618-3|KPYM_HUMAN Isoform 3 of Pyruvate kinase PKM OS=Homo sapiens GN=PKM;>sp|P14618-2|KPYM_HUMAN Isoform M1 of Pyruvate kinase PKM OS=Homo sapiens GN=PKM;>tr|Q504U3|Q504U3_HU	MULTI-MSMS		JACB153_1	MDA-MB-231 R10K8	494.26	2	490.255	978.496	49404.9	-0.31856	-0.015202	-0.33376	490.255	494.262	34.258	15.416	0.82417	34.258	33.938	34.762	0		0	0	0	3.0711e-05	1	10910	156.01	156.01	1	49.732	0.62664	0
VIISAPSADAPMFVMGVNHEK	21	1	0	Unmodified	_VIISAPSADAPMFVMGVNHEK_			0	0	P04406;P04406-2;E7EUT5	P04406	P04406	GAPDH	Glyceraldehyde-3-phosphate dehydrogenase	>sp|P04406|G3P_HUMAN Glyceraldehyde-3-phosphate dehydrogenase OS=Homo sapiens GN=GAPDH PE=1 SV=3;>sp|P04406-2|G3P_HUMAN Isoform 2 of Glyceraldehyde-3-phosphate dehydrogenase OS=Homo sapiens GN=GAPDH;>tr|E7EUT5|E7EUT5_HUMAN Glyceraldehyde-3-phosphate dehydr	MULTI-MSMS		JACB153_1	MDA-MB-231 R10K8	741.38	3	738.375	2212.1	40412.4	-0.43723	-0.30339	-0.74062	738.71	741.38	54.019	22.005	1.1835	54.019	53.627	54.811	0		0	0	0	5.9141e-12	1	18642	130.36	130.36	1	49.734	0.34476	0
EQGVLSFWR	9	0	1	Unmodified	_EQGVLSFWR_			0	0	P05141;P12236;I7HJJ0	P05141;P12236	P12236	SLC25A5;SLC25A6	ADP/ATP translocase 2;ADP/ATP translocase 3	>sp|P05141|ADT2_HUMAN ADP/ATP translocase 2 OS=Homo sapiens GN=SLC25A5 PE=1 SV=7;>sp|P12236|ADT3_HUMAN ADP/ATP translocase 3 OS=Homo sapiens GN=SLC25A6 PE=1 SV=4;>tr|I7HJJ0|I7HJJ0_HUMAN ADP/ATP translocase 3 (Fragment) OS=Homo sapiens GN=SLC25A6 PE=1 SV=1	MULTI-MSMS		JACB153_1	MDA-MB-231 R10K8	566.29	2	561.291	1120.57	46565.4	0.21445	0.055389	0.26984	561.29	566.295	56.615	22.868	0.62768	56.615	56.312	56.939	0		0	0	0	0.0024832	2	19636	89.08	76.866	1	49.935	6.4828	0
LLLPGELAK	9	1	0	Unmodified	_LLLPGELAK_			0	0	B4DR52;U3KQK0;Q5QNW6-2;O60814;P57053;P58876;P62807;Q5QNW6;Q93079;Q99877;Q99879;Q99880;P06899;P23527;P33778;Q16778;Q8N257;Q96A08	B4DR52	B4DR52	HIST2H2BF;HIST1H2BK;H2BFS;HIST1H2BD;HIST1H2BC;HIST1H2BH;HIST1H2BN;HIST1H2BM;HIST1H2BL;HIST1H2BJ;HIST1H2BO;HIST1H2BB;HIST2H2BE;HIST3H2BB;HIST1H2BA	Histone H2B;Histone H2B type 1-K;Histone H2B type F-S;Histone H2B type 1-D;Histone H2B type 1-C/E/F/G/I;Histone H2B type 2-F;Histone H2B type 1-H;Histone H2B type 1-N;Histone H2B type 1-M;Histone H2B type 1-L;Histone H2B type 1-J;Histone H2B type 1-O;Histone H2B type 1-B;Histone H2B type 2-E;Histone H2B type 3-B;Histone H2B type 1-A	>tr|B4DR52|B4DR52_HUMAN Histone H2B OS=Homo sapiens GN=HIST2H2BF PE=1 SV=1;>tr|U3KQK0|U3KQK0_HUMAN Histone H2B OS=Homo sapiens GN=HIST1H2BN PE=1 SV=1;>sp|Q5QNW6-2|H2B2F_HUMAN Isoform 2 of Histone H2B type 2-F OS=Homo sapiens GN=HIST2H2BF;>sp|O60814|H2B1K_H	MULTI-MSMS		JACB153_1	MDA-MB-231 R10K8	481.31	2	477.305	952.596	50157	0.59994	-0.7671	-0.16717	477.305	481.312	45.864	19.283	1.0669	45.864	45.637	46.704	0		0	0	0	0.0054088	1	15491	78.934	5.0033	1	50.184	0.49979	0
LGEIVTTIPTIGFNVETVEYK	21	1	0	Unmodified	_LGEIVTTIPTIGFNVETVEYK_			0	0	P18085;C9JPM4;P84085;C9J1Z8;P84077;F5H423;F5H0C7;P61204	P18085;P84085;P84077;P61204	P84077	ARF4;ARF5;ARF1;ARF3	ADP-ribosylation factor 4;ADP-ribosylation factor 5;ADP-ribosylation factor 1;ADP-ribosylation factor 3	>sp|P18085|ARF4_HUMAN ADP-ribosylation factor 4 OS=Homo sapiens GN=ARF4 PE=1 SV=3;>tr|C9JPM4|C9JPM4_HUMAN ADP-ribosylation factor 4 (Fragment) OS=Homo sapiens GN=ARF4 PE=1 SV=1;>sp|P84085|ARF5_HUMAN ADP-ribosylation factor 5 OS=Homo sapiens GN=ARF5 PE=1 SV	MULTI-MSMS		JACB153_1	MDA-MB-231 R10K8	778.09	3	775.086	2322.24	40111.4	-0.38646	-0.16484	-0.5513	775.086	778.091	74.312	28.772	0.60915	74.312	74.033	74.642	0		0	0	0	2.2604e-07	2	25888	114.55	114.55	1	50.771	1.2167	0
VTIAQGGVLPNIQAVLLPK	19	1	0	Unmodified	_VTIAQGGVLPNIQAVLLPK_			0	0	P04908;P0C0S8;P20671;Q6FI13;Q7L7L0;Q93077;Q16777;Q9BTM1;Q96KK5;Q99878;H0YFX9	P04908	P04908	HIST1H2AB;HIST1H2AG;HIST1H2AD;HIST2H2AA3;HIST3H2A;HIST1H2AC;HIST2H2AC;H2AFJ;HIST1H2AH;HIST1H2AJ	Histone H2A type 1-B/E;Histone H2A type 1;Histone H2A type 1-D;Histone H2A type 2-A;Histone H2A type 3;Histone H2A type 1-C;Histone H2A type 2-C;Histone H2A.J;Histone H2A type 1-H;Histone H2A type 1-J;Histone H2A	>sp|P04908|H2A1B_HUMAN Histone H2A type 1-B/E OS=Homo sapiens GN=HIST1H2AB PE=1 SV=2;>sp|P0C0S8|H2A1_HUMAN Histone H2A type 1 OS=Homo sapiens GN=HIST1H2AG PE=1 SV=2;>sp|P20671|H2A1D_HUMAN Histone H2A type 1-D OS=Homo sapiens GN=HIST1H2AD PE=1 SV=2;>sp|Q6FI	MULTI-MSMS		JACB153_1	MDA-MB-231 R10K8	647.4	3	644.394	1930.16	43828.5	-0.090451	0.056534	-0.033918	644.729	647.4	72.682	28.228	0.65012	72.682	72.382	73.032	0		0	0	0	5.5915e-08	2	25412	122.31	122.31	1	51.049	0.66046	0
VEFMDDTSR	9	0	1	Unmodified	_VEFMDDTSR_			0	0	P62857	P62857	P62857	RPS28	40S ribosomal protein S28	>sp|P62857|RS28_HUMAN 40S ribosomal protein S28 OS=Homo sapiens GN=RPS28 PE=1 SV=1	MULTI-MSMS		JACB153_1	MDA-MB-231 R10K8	555.24	2	550.24	1098.47	46541.6	0.10372	-0.14443	-0.040712	550.241	555.244	30.997	14.332	0.54666	30.997	30.736	31.282	1.9073e-06		0	0	0	0.00067721	1	9599	121.73	121.73	1	51.151	6.6405	0
YGINTTDIFQTVDLWEGK	18	1	0	Unmodified	_YGINTTDIFQTVDLWEGK_			0	0	P37802;X6RJP6	P37802	P37802	TAGLN2	Transgelin-2	>sp|P37802|TAGL2_HUMAN Transgelin-2 OS=Homo sapiens GN=TAGLN2 PE=1 SV=3;>tr|X6RJP6|X6RJP6_HUMAN Transgelin-2 (Fragment) OS=Homo sapiens GN=TAGLN2 PE=4 SV=1	MULTI-MSMS		JACB153_1	MDA-MB-231 R10K8	1055.03	2	1050.52	2099.02	34182	-0.51735	0.28357	-0.23377	1051.52	1055.03	80.336	30.777	0.78028	80.336	80.058	80.838	0		0	0	0	5.1092e-11	2	27997	147.92	143.65	1	51.568	1.0595	0
LKGDDLQAIK	10	2	0	Unmodified	_LKGDDLQAIK_			0	0	P07910-2;G3V4C1;B4DY08;G3V4W0;P07910;G3V2Q1;G3V576;P07910-3;G3V2D6;G3V5V7;O60812	P07910-2	P07910-2	HNRNPC;HNRNPCL1	Heterogeneous nuclear ribonucleoproteins C1/C2;Heterogeneous nuclear ribonucleoprotein C-like 1	>sp|P07910-2|HNRPC_HUMAN Isoform C1 of Heterogeneous nuclear ribonucleoproteins C1/C2 OS=Homo sapiens GN=HNRNPC;>tr|G3V4C1|G3V4C1_HUMAN Heterogeneous nuclear ribonucleoproteins C1/C2 OS=Homo sapiens GN=HNRNPC PE=1 SV=1;>tr|B4DY08|B4DY08_HUMAN Heterogeneous	MULTI-MSMS		JACB153_1	MDA-MB-231 R10K8	372.89	3	367.549	1099.62	56738.6	0.10748	0.16891	0.27639	367.55	372.891	22.026	11.343	0.46597	22.026	21.842	22.308	0		0	0	0	0.019231	1	6030	71.03	52.285	1	52.463	56.851	0
TLTAVHDAILEDLVFPSEIVGK	22	1	0	Unmodified	_TLTAVHDAILEDLVFPSEIVGK_			0	0	P62081;B5MCP9	P62081	P62081	RPS7	40S ribosomal protein S7	>sp|P62081|RS7_HUMAN 40S ribosomal protein S7 OS=Homo sapiens GN=RPS7 PE=1 SV=1;>tr|B5MCP9|B5MCP9_HUMAN 40S ribosomal protein S7 OS=Homo sapiens GN=RPS7 PE=1 SV=1	MULTI-MSMS		JACB153_1	MDA-MB-231 R10K8	792.77	3	789.765	2366.27	39591.6	-0.39272	0.31087	-0.081846	790.434	792.771	74.544	28.849	1.2662	74.544	74.101	75.367	0		0	0	0	4.5873e-12	3	26050	143.57	143.57	1	52.61	1.0288	0
NDFQLIGIQDGYLSLLQDSGEVR	23	0	1	Unmodified	_NDFQLIGIQDGYLSLLQDSGEVR_			0	0	P63241-2;P63241;I3L504;I3L397	P63241-2	P63241-2	EIF5A	Eukaryotic translation initiation factor 5A-1	>sp|P63241-2|IF5A1_HUMAN Isoform 2 of Eukaryotic translation initiation factor 5A-1 OS=Homo sapiens GN=EIF5A;>sp|P63241|IF5A1_HUMAN Eukaryotic translation initiation factor 5A-1 OS=Homo sapiens GN=EIF5A PE=1 SV=2;>tr|I3L504|I3L504_HUMAN Eukaryotic translat	MULTI-MSMS		JACB153_1	MDA-MB-231 R10K8	864.77	3	860.77	2579.29	37946.4	-0.42559	-0.17355	-0.59914	861.103	864.44	83.92	31.973	1.1864	83.92	83.633	84.82	0		0	0	0	8.3336e-07	2	29263	106.69	106.69	1	53.209	6.9078	0
VGEVIVTK	8	1	0	Unmodified	_VGEVIVTK_			0	0	P10809	P10809	P10809	HSPD1	60 kDa heat shock protein, mitochondrial	>sp|P10809|CH60_HUMAN 60 kDa heat shock protein, mitochondrial OS=Homo sapiens GN=HSPD1 PE=1 SV=2	MULTI-MSMS		JACB153_1	MDA-MB-231 R10K8	426.77	2	422.761	843.507	53847.2	-0.20773	0.14188	-0.065852	422.76	426.768	23.196	11.733	0.42755	23.196	23.04	23.467	1.9073e-06		0	0	0	0.0075385	1	6485	78.264	40.178	1	53.37	1.2745	0
YSVDIPLDK	9	1	0	Unmodified	_YSVDIPLDK_			0	0	P61353;K7ELC7;K7EQQ9	P61353	P61353	RPL27	60S ribosomal protein L27	>sp|P61353|RL27_HUMAN 60S ribosomal protein L27 OS=Homo sapiens GN=RPL27 PE=1 SV=2;>tr|K7ELC7|K7ELC7_HUMAN 60S ribosomal protein L27 (Fragment) OS=Homo sapiens GN=RPL27 PE=1 SV=1;>tr|K7EQQ9|K7EQQ9_HUMAN 60S ribosomal protein L27 OS=Homo sapiens GN=RPL27 PE	MULTI-MSMS		JACB153_1	MDA-MB-231 R10K8	529.29	2	525.279	1048.54	47398.8	0.4698	0.052829	0.52263	525.279	529.286	43.086	18.362	0.4657	43.086	42.88	43.345	0		0	0	0	0.0054893	1	14427	78.655	52.141	1	53.571	0.99258	0
LIDLHSPSEIVK	12	1	0	Unmodified	_LIDLHSPSEIVK_			0	0	P60866-2;P60866;G3XAN0	P60866-2	P60866-2	RPS20	40S ribosomal protein S20	>sp|P60866-2|RS20_HUMAN Isoform 2 of 40S ribosomal protein S20 OS=Homo sapiens GN=RPS20;>sp|P60866|RS20_HUMAN 40S ribosomal protein S20 OS=Homo sapiens GN=RPS20 PE=1 SV=1;>tr|G3XAN0|G3XAN0_HUMAN 40S ribosomal protein S20 OS=Homo sapiens GN=RPS20 PE=1 SV=1	MULTI-MSMS		JACB153_1	MDA-MB-231 R10K8	453.6	3	450.926	1349.76	51818.2	-0.01222	-0.51761	-0.52983	450.925	453.597	38.615	16.87	0.76652	38.615	38.391	39.158	0		0	0	0	0.00011925	1	12660	125.28	125.28	1	53.662	0.86486	0
VLTVINQTQK	10	1	0	Unmodified	_VLTVINQTQK_			0	0	P42766;F2Z388	P42766	P42766	RPL35	60S ribosomal protein L35	>sp|P42766|RL35_HUMAN 60S ribosomal protein L35 OS=Homo sapiens GN=RPL35 PE=1 SV=2;>tr|F2Z388|F2Z388_HUMAN 60S ribosomal protein L35 OS=Homo sapiens GN=RPL35 PE=1 SV=1	MULTI-MSMS		JACB153_1	MDA-MB-231 R10K8	576.35	2	572.34	1142.67	46346.8	0.21418	-0.40815	-0.19397	572.34	576.347	27.03	13.006	0.52189	27.03	26.854	27.376	0		0	0	0	7.8233e-14	1	8023	231.23	231.23	1	53.744	1.2684	0
GLFIIDDK	8	1	0	Unmodified	_GLFIIDDK_			0	0	Q06830;Q13162;H7C3T4	Q06830;Q13162	Q06830	PRDX1;PRDX4	Peroxiredoxin-1;Peroxiredoxin-4	>sp|Q06830|PRDX1_HUMAN Peroxiredoxin-1 OS=Homo sapiens GN=PRDX1 PE=1 SV=1;>sp|Q13162|PRDX4_HUMAN Peroxiredoxin-4 OS=Homo sapiens GN=PRDX4 PE=1 SV=1;>tr|H7C3T4|H7C3T4_HUMAN Peroxiredoxin-4 (Fragment) OS=Homo sapiens GN=PRDX4 PE=1 SV=1	MULTI-MSMS		JACB153_1	MDA-MB-231 R10K8	464.76	2	460.758	919.501	50659	-0.0023039	-0.1884	-0.19071	460.758	464.765	50.546	20.85	0.78247	50.546	50.304	51.087	0		0	0	0	0.0055812	3	17259	84.498	73.347	1	53.792	0.76289	0
VETELQGVCDTVLGLLDSHLIK	22	1	0	Unmodified	_VETELQGVCDTVLGLLDSHLIK_			0	0	P31947	P31947	P31947	SFN	14-3-3 protein sigma	>sp|P31947|1433S_HUMAN 14-3-3 protein sigma OS=Homo sapiens GN=SFN PE=1 SV=1	MULTI-MSMS		JACB153_1	MDA-MB-231 R10K8	816.77	3	813.765	2438.27	38318.2	-0.43147	0.089819	-0.34165	814.1	816.771	84.764	32.254	0.72032	84.764	84.484	85.204	0		0	0	0	1.6731e-12	2	29658	151.82	151.82	1	53.971	1.7814	0
IIYGGSVTGATCK	13	1	0	Unmodified	_IIYGGSVTGATCK_			0	0	P60174;P60174-1;P60174-4	P60174	P60174	TPI1	Triosephosphate isomerase	>sp|P60174|TPIS_HUMAN Triosephosphate isomerase OS=Homo sapiens GN=TPI1 PE=1 SV=3;>sp|P60174-1|TPIS_HUMAN Isoform 2 of Triosephosphate isomerase OS=Homo sapiens GN=TPI1;>sp|P60174-4|TPIS_HUMAN Isoform 4 of Triosephosphate isomerase OS=Homo sapiens GN=TPI1	MULTI-MSMS		JACB153_1	MDA-MB-231 R10K8	667.85	2	663.84	1325.66	41437.7	-0.66016	-1.0467	-1.7068	663.84	667.846	28.443	13.485	0.49969	28.443	28.258	28.757	-1.9073e-06		0	0	0	5.9163e-05	1	8579	128.54	115.91	1	54.069	0.83903	0
VIMVTGDHPITAK	13	1	0	Unmodified	_VIMVTGDHPITAK_			0	0	P05023;P05023-4;P05023-3;P05023-2;P13637-3;P13637-2;P13637;M0R116;P50993;B1AKY9;H0Y7C1;Q13733;P54707-2;P54707;P20648	P05023	P05023	ATP1A1;ATP1A3;ATP1A2;ATP1A4;ATP12A;ATP4A	Sodium/potassium-transporting ATPase subunit alpha-1;Sodium/potassium-transporting ATPase subunit alpha-3;Sodium/potassium-transporting ATPase subunit alpha-2;Sodium/potassium-transporting ATPase subunit alpha-4;Potassium-transporting ATPase alpha chain 2;Potassium-transporting ATPase alpha chain 1	>sp|P05023|AT1A1_HUMAN Sodium/potassium-transporting ATPase subunit alpha-1 OS=Homo sapiens GN=ATP1A1 PE=1 SV=1;>sp|P05023-4|AT1A1_HUMAN Isoform 4 of Sodium/potassium-transporting ATPase subunit alpha-1 OS=Homo sapiens GN=ATP1A1;>sp|P05023-3|AT1A1_HUMAN Is	MULTI-MSMS		JACB153_1	MDA-MB-231 R10K8	463.93	3	461.255	1380.74	50546	-0.51001	0.08119	-0.42882	461.924	463.927	27.496	13.169	0.34707	27.496	27.332	27.679	-1.9073e-06		0	0	0	0.0021791	1	8210	88.552	72.415	1	54.099	1.5345	0
IISSIEQK	8	1	0	Unmodified	_IISSIEQK_			0	0	P62258;P62258-2;K7EIT4;I3L3T1;B4DJF2	P62258	P62258	YWHAE	14-3-3 protein epsilon	>sp|P62258|1433E_HUMAN 14-3-3 protein epsilon OS=Homo sapiens GN=YWHAE PE=1 SV=1;>sp|P62258-2|1433E_HUMAN Isoform SV of 14-3-3 protein epsilon OS=Homo sapiens GN=YWHAE;>tr|K7EIT4|K7EIT4_HUMAN 14-3-3 protein epsilon (Fragment) OS=Homo sapiens GN=YWHAE PE=1	MULTI-MSMS		JACB153_1	MDA-MB-231 R10K8	463.28	2	459.269	916.523	51386.3	-0.19304	-0.24012	-0.43317	459.269	463.276	21.322	11.108	0.50986	21.322	21.136	21.645	0		0	0	0	0.0018828	1	5756	127.02	57.823	1	54.131	1.0191	0
YLLNLNLEPFSEK	13	1	0	Unmodified	_YLLNLNLEPFSEK_			0	0	P21980;B4DIT7;F5H6P0	P21980	P21980	TGM2	Protein-glutamine gamma-glutamyltransferase 2	>sp|P21980|TGM2_HUMAN Protein-glutamine gamma-glutamyltransferase 2 OS=Homo sapiens GN=TGM2 PE=1 SV=2;>tr|B4DIT7|B4DIT7_HUMAN Protein-glutamine gamma-glutamyltransferase 2 OS=Homo sapiens GN=TGM2 PE=1 SV=1;>tr|F5H6P0|F5H6P0_HUMAN Protein-glutamine gamma-gl	MULTI-MSMS		JACB153_1	MDA-MB-231 R10K8	794.43	2	790.422	1578.83	38508.8	-0.63271	0.68009	0.047379	790.422	794.429	68.71	26.907	0.52145	68.71	68.477	68.999	0		0	0	0	1.1668e-05	1	23899	151.78	142.49	1	54.21	1.3822	0
NALLSLAK	8	1	0	Unmodified	_NALLSLAK_			0	0	P04083;Q5T3N1	P04083	P04083	ANXA1	Annexin A1;Annexin	>sp|P04083|ANXA1_HUMAN Annexin A1 OS=Homo sapiens GN=ANXA1 PE=1 SV=2;>tr|Q5T3N1|Q5T3N1_HUMAN Annexin (Fragment) OS=Homo sapiens GN=ANXA1 PE=1 SV=1	MULTI-MSMS		JACB153_1	MDA-MB-231 R10K8	419.27	2	415.261	828.507	53768.2	0.018334	-0.41383	-0.3955	415.261	419.268	37.033	16.347	0.69305	37.033	36.811	37.504	0		0	0	0	0.0074593	1	12025	78.516	15.97	1	54.224	0.75748	0
SLQSVAEER	9	0	1	Unmodified	_SLQSVAEER_			0	0	P61313;E7EQV9;E7EX53;P61313-2	P61313	P61313	RPL15	60S ribosomal protein L15;Ribosomal protein L15	>sp|P61313|RL15_HUMAN 60S ribosomal protein L15 OS=Homo sapiens GN=RPL15 PE=1 SV=2;>tr|E7EQV9|E7EQV9_HUMAN Ribosomal protein L15 (Fragment) OS=Homo sapiens GN=RPL15 PE=1 SV=1;>tr|E7EX53|E7EX53_HUMAN Ribosomal protein L15 (Fragment) OS=Homo sapiens GN=RPL15	MULTI-MSMS		JACB153_1	MDA-MB-231 R10K8	514.77	2	509.762	1017.51	48108.5	0.27387	-0.23146	0.042406	509.763	514.766	21.712	11.239	0.42041	21.712	21.511	21.931	-1.9073e-06		0	0	0	0.00081477	1	5904	112.75	76.415	1	54.331	7.0535	0
VVDLLAPYAK	10	1	0	Unmodified	_VVDLLAPYAK_			0	0	P06576;F8VPV9;H0YH81;F8W079	P06576	P06576	ATP5B	ATP synthase subunit beta, mitochondrial;ATP synthase subunit beta	>sp|P06576|ATPB_HUMAN ATP synthase subunit beta, mitochondrial OS=Homo sapiens GN=ATP5B PE=1 SV=3;>tr|F8VPV9|F8VPV9_HUMAN ATP synthase subunit beta OS=Homo sapiens GN=ATP5B PE=1 SV=1;>tr|H0YH81|H0YH81_HUMAN ATP synthase subunit beta (Fragment) OS=Homo sapi	MULTI-MSMS		JACB153_1	MDA-MB-231 R10K8	548.83	2	544.821	1087.63	47671.2	0.48378	0.15152	0.6353	544.821	548.828	49.425	20.474	0.57508	49.425	49.21	49.785	0		0	0	0	0.0011989	1	16867	96.89	95.133	1	54.61	1.2528	0
LLGWIQNK	8	1	0	Unmodified	_LLGWIQNK_			0	0	Q14315;Q14315-2;P21333;P21333-2;Q5HY54;F8WE98;O75369;O75369-9;O75369-2;O75369-3;O75369-6;O75369-4;O75369-5;O75369-8	Q14315;P21333;O75369;O75369-8	O75369-8	FLNC;FLNA;FLNB	Filamin-C;Filamin-A;Filamin-B	>sp|Q14315|FLNC_HUMAN Filamin-C OS=Homo sapiens GN=FLNC PE=1 SV=3;>sp|Q14315-2|FLNC_HUMAN Isoform 2 of Filamin-C OS=Homo sapiens GN=FLNC;>sp|P21333|FLNA_HUMAN Filamin-A OS=Homo sapiens GN=FLNA PE=1 SV=4;>sp|P21333-2|FLNA_HUMAN Isoform 2 of Filamin-A OS=Hom	MULTI-MSMS		JACB153_1	MDA-MB-231 R10K8	490.29	2	486.287	970.56	49376.4	0.28921	-0.27188	0.017336	486.286	490.294	43.881	18.625	0.83635	43.881	43.561	44.397	0		0	0	0	0.0025455	2	14714	98.418	98.418	1	54.678	0.90062	0
THMTHHAVSDHEATLR	16	0	1	Unmodified	_THMTHHAVSDHEATLR_			0	0	P01892;P10316;P01891;P16189;P16190;P30453;P30459;P30457;P10314;P30512;P18462;P30450;P30456	P01892	P01892	HLA-A	HLA class I histocompatibility antigen, A-2 alpha chain;HLA class I histocompatibility antigen, A-69 alpha chain;HLA class I histocompatibility antigen, A-68 alpha chain;HLA class I histocompatibility antigen, A-31 alpha chain;HLA class I histocompatibility antigen, A-33 alpha chain;HLA class I histocompatibility antigen, A-34 alpha chain;HLA class I histocompatibility antigen, A-74 alpha chain;H…	>sp|P01892|1A02_HUMAN HLA class I histocompatibility antigen, A-2 alpha chain OS=Homo sapiens GN=HLA-A PE=1 SV=1;>sp|P10316|1A69_HUMAN HLA class I histocompatibility antigen, A-69 alpha chain OS=Homo sapiens GN=HLA-A PE=1 SV=2;>sp|P01891|1A68_HUMAN HLA cla	MULTI-MSMS		JACB153_1	MDA-MB-231 R10K8	463.97	4	461.472	1841.86	50977.1	0.20445	0.16925	0.37371	461.723	463.974	14.469	8.8244	0.32397	14.469	14.348	14.672	0		0	0	0	4.5734e-06	1	3235	115.5	115.5	1	54.749	7.1076	0
DLSLEEIQK	9	1	0	Unmodified	_DLSLEEIQK_			0	0	P16949-2;P16949;A2A2D0;Q93045-2;Q93045;E5RGX5	P16949-2;Q93045-2	P16949-2	STMN1;STMN2	Stathmin;Stathmin-2	>sp|P16949-2|STMN1_HUMAN Isoform 2 of Stathmin OS=Homo sapiens GN=STMN1;>sp|P16949|STMN1_HUMAN Stathmin OS=Homo sapiens GN=STMN1 PE=1 SV=3;>tr|A2A2D0|A2A2D0_HUMAN Stathmin (Fragment) OS=Homo sapiens GN=STMN1 PE=1 SV=2;>sp|Q93045-2|STMN2_HUMAN Isoform 2 of	MULTI-MSMS		JACB153_1	MDA-MB-231 R10K8	541.79	2	537.788	1073.56	48183.1	0.251	-0.42835	-0.17735	537.787	541.794	42.361	18.125	0.71033	42.361	42.044	42.754	-3.8147e-06		0	0	0	0.00017487	2	14130	148.52	87.631	1	54.838	0.68366	0
LVLVGDGGTGK	11	1	0	Unmodified	_LVLVGDGGTGK_			0	0	B5MDF5;P62826;J3KQE5;F5H018;H0YFC6	B5MDF5	B5MDF5	RAN	GTP-binding nuclear protein Ran	>tr|B5MDF5|B5MDF5_HUMAN GTP-binding nuclear protein Ran OS=Homo sapiens GN=RAN PE=1 SV=1;>sp|P62826|RAN_HUMAN GTP-binding nuclear protein Ran OS=Homo sapiens GN=RAN PE=1 SV=3;>tr|J3KQE5|J3KQE5_HUMAN GTP-binding nuclear protein Ran (Fragment) OS=Homo sapien	MULTI-MSMS		JACB153_1	MDA-MB-231 R10K8	512.3	2	508.293	1014.57	48504.8	0.22179	0.61678	0.83857	508.293	512.3	30.613	14.202	0.7674	30.613	30.421	31.189	-1.9073e-06		0	0	0	0.00073461	1	9458	98.353	30.285	1	55.078	0.75321	0
VSTLPAITLK	10	1	0	Unmodified	_VSTLPAITLK_			0	0	P07339;H7C469;H7C1V0	P07339	P07339	CTSD	Cathepsin D;Cathepsin D light chain;Cathepsin D heavy chain	>sp|P07339|CATD_HUMAN Cathepsin D OS=Homo sapiens GN=CTSD PE=1 SV=1;>tr|H7C469|H7C469_HUMAN Uncharacterized protein (Fragment) OS=Homo sapiens PE=3 SV=1;>tr|H7C1V0|H7C1V0_HUMAN Cathepsin D light chain (Fragment) OS=Homo sapiens GN=CTSD PE=1 SV=1	MULTI-MSMS		JACB153_1	MDA-MB-231 R10K8	525.84	2	521.829	1041.64	48537.2	0.39001	-0.1707	0.21931	521.829	525.836	44.971	18.989	0.50039	44.971	44.752	45.252	-3.8147e-06		0	0	0	0.068455	1	15145	52.247	52.247	1	55.122	1.094	0
EIFLSQPILLELEAPLK	17	1	0	Unmodified	_EIFLSQPILLELEAPLK_			0	0	P36873-2;P36873;F8VYE8;F8W0W8;F8VR82;F8WE71;P62136;P62136-2;E9PMD7;F5H037;F5H1L6;P62140;E7ETD8;C9JP48;C9J9S3	P36873-2;P62136;P62140	P62136	PPP1CC;PPP1CB;PPP1CA	Serine/threonine-protein phosphatase PP1-gamma catalytic subunit;Serine/threonine-protein phosphatase;Serine/threonine-protein phosphatase PP1-alpha catalytic subunit;Serine/threonine-protein phosphatase PP1-beta catalytic subunit	>sp|P36873-2|PP1G_HUMAN Isoform Gamma-2 of Serine/threonine-protein phosphatase PP1-gamma catalytic subunit OS=Homo sapiens GN=PPP1CC;>sp|P36873|PP1G_HUMAN Serine/threonine-protein phosphatase PP1-gamma catalytic subunit OS=Homo sapiens GN=PPP1CC PE=1 SV=1	MULTI-MSMS		JACB153_1	MDA-MB-231 R10K8	981.58	2	977.069	1952.12	35817.5	-0.54422	0.15124	-0.39298	977.57	981.578	85.921	32.642	0.69739	85.921	85.653	86.35	7.6294e-06		0	0	0	8.7189e-09	2	30068	144.73	144.73	1	55.296	1.5099	0
IDSLSAQLSQLQK	13	1	0	Unmodified	_IDSLSAQLSQLQK_			0	0	P02545;P02545-3;P02545-6;P02545-4;P02545-5;P02545-2;Q5TCI8	P02545;P02545-2	P02545	LMNA	Prelamin-A/C;Lamin-A/C	>sp|P02545|LMNA_HUMAN Prelamin-A/C OS=Homo sapiens GN=LMNA PE=1 SV=1;>sp|P02545-3|LMNA_HUMAN Isoform ADelta10 of Prelamin-A/C OS=Homo sapiens GN=LMNA;>sp|P02545-6|LMNA_HUMAN Isoform 6 of Prelamin-A/C OS=Homo sapiens GN=LMNA;>sp|P02545-4|LMNA_HUMAN Isoform	MULTI-MSMS		JACB153_1	MDA-MB-231 R10K8	719.9	2	715.896	1429.78	41583.9	-0.35196	-0.17164	-0.5236	715.896	719.903	47.614	19.867	0.54736	47.614	47.353	47.9	0		0	0	0	1.5263e-06	1	16160	162.97	121.33	1	55.464	0.88534	0
ILDSVGIEADDDRLNK	16	1	1	Unmodified	_ILDSVGIEADDDRLNK_			0	0	P05387	P05387	P05387	RPLP2	60S acidic ribosomal protein P2	>sp|P05387|RLA2_HUMAN 60S acidic ribosomal protein P2 OS=Homo sapiens GN=RPLP2 PE=1 SV=1	MULTI-MSMS		JACB153_1	MDA-MB-231 R10K8	597.65	3	591.639	1771.9	44931.5	-0.017051	0.16717	0.15012	591.638	597.647	37.796	16.6	0.83642	37.796	37.371	38.207	0		0	0	0	1.864e-05	1	12338	108.63	108.63	1	55.538	81.848	0
AAYEAELGDAR	11	0	1	Unmodified	_AAYEAELGDAR_			0	0	P02545;P02545-3;P02545-6;P02545-2	P02545;P02545-2	P02545	LMNA	Prelamin-A/C;Lamin-A/C	>sp|P02545|LMNA_HUMAN Prelamin-A/C OS=Homo sapiens GN=LMNA PE=1 SV=1;>sp|P02545-3|LMNA_HUMAN Isoform ADelta10 of Prelamin-A/C OS=Homo sapiens GN=LMNA;>sp|P02545-6|LMNA_HUMAN Isoform 6 of Prelamin-A/C OS=Homo sapiens GN=LMNA;>sp|P02545-2|LMNA_HUMAN Isoform	MULTI-MSMS		JACB153_1	MDA-MB-231 R10K8	588.28	2	583.278	1164.54	44580.1	-0.53355	-0.69306	-1.2266	583.278	588.281	27.633	13.214	0.45751	27.633	27.397	27.854	1.9073e-06		0	0	0	0.0010007	1	8235	93.345	75.077	1	55.61	7.2195	0
DLFEDELVPLFEK	13	1	0	Unmodified	_DLFEDELVPLFEK_			0	0	O60506;O60506-2;O60506-3;O60506-4;O60506-5;F6UXX1	O60506	O60506	SYNCRIP	Heterogeneous nuclear ribonucleoprotein Q	>sp|O60506|HNRPQ_HUMAN Heterogeneous nuclear ribonucleoprotein Q OS=Homo sapiens GN=SYNCRIP PE=1 SV=2;>sp|O60506-2|HNRPQ_HUMAN Isoform 2 of Heterogeneous nuclear ribonucleoprotein Q OS=Homo sapiens GN=SYNCRIP;>sp|O60506-3|HNRPQ_HUMAN Isoform 3 of Heterogen	MULTI-MSMS		JACB153_1	MDA-MB-231 R10K8	801.41	2	797.406	1592.8	39407.3	-0.46101	0.028137	-0.43287	797.407	801.413	85.36	32.455	0.63263	85.36	85.09	85.723	0		0	0	0	3.3057e-05	2	29879	141.32	141.32	1	55.958	1.738	0
GIFPVLCK	8	1	0	Unmodified	_GIFPVLCK_			0	0	P14618;P14618-3;P14618-2;H3BTN5;Q504U3	P14618;P14618-2	P14618	PKM2	Pyruvate kinase isozymes M1/M2;Pyruvate kinase	>sp|P14618|KPYM_HUMAN Pyruvate kinase PKM OS=Homo sapiens GN=PKM PE=1 SV=4;>sp|P14618-3|KPYM_HUMAN Isoform 3 of Pyruvate kinase PKM OS=Homo sapiens GN=PKM;>sp|P14618-2|KPYM_HUMAN Isoform M1 of Pyruvate kinase PKM OS=Homo sapiens GN=PKM;>tr|H3BTN5|H3BTN5_HU	MULTI-MSMS		JACB153_1	MDA-MB-231 R10K8	471.27	2	467.265	932.515	51024.6	0.40132	-0.43066	-0.029335	467.266	471.272	49.925	20.64	1.0283	49.925	49.535	50.563	-3.8147e-06		0	0	0	0.011754	2	17115	64.836	64.836	1	56.139	0.78388	0
ELGITALHIK	10	1	0	Unmodified	_ELGITALHIK_			0	0	P62263;E5RH77;H0YB22	P62263	P62263	RPS14	40S ribosomal protein S14	>sp|P62263|RS14_HUMAN 40S ribosomal protein S14 OS=Homo sapiens GN=RPS14 PE=1 SV=3;>tr|E5RH77|E5RH77_HUMAN 40S ribosomal protein S14 OS=Homo sapiens GN=RPS14 PE=1 SV=1;>tr|H0YB22|H0YB22_HUMAN 40S ribosomal protein S14 (Fragment) OS=Homo sapiens GN=RPS14 PE	MULTI-MSMS		JACB153_1	MDA-MB-231 R10K8	368.23	3	365.557	1093.65	57311.7	0.079004	-0.017333	0.061671	365.557	368.228	39.629	17.208	0.48662	39.629	39.415	39.901	0		0	0	0	0.021727	1	13058	60.518	60.518	1	56.409	1.3964	0
LTLSALLDGK	10	1	0	Unmodified	_LTLSALLDGK_			0	0	P21796	P21796	P21796	VDAC1	Voltage-dependent anion-selective channel protein 1	>sp|P21796|VDAC1_HUMAN Voltage-dependent anion-selective channel protein 1 OS=Homo sapiens GN=VDAC1 PE=1 SV=2	MULTI-MSMS		JACB153_1	MDA-MB-231 R10K8	519.82	2	515.811	1029.61	48738.1	0.23258	-0.020741	0.21184	515.81	519.818	57.431	23.141	0.69147	57.431	57.095	57.787	0		0	0	0	0.00081083	2	19823	125.74	0	1	56.542	1.0628	0
SAINEVVTR	9	0	1	Unmodified	_SAINEVVTR_			0	0	B7Z4C8;P62899-2;P62899;P62899-3;B7Z4E3;C9JU56;H7C2W9;B8ZZK4	B7Z4C8	B7Z4C8	RPL31	60S ribosomal protein L31	>tr|B7Z4C8|B7Z4C8_HUMAN 60S ribosomal protein L31 OS=Homo sapiens GN=RPL31 PE=1 SV=1;>sp|P62899-2|RL31_HUMAN Isoform 2 of 60S ribosomal protein L31 OS=Homo sapiens GN=RPL31;>sp|P62899|RL31_HUMAN 60S ribosomal protein L31 OS=Homo sapiens GN=RPL31 PE=1 SV=1;	MULTI-MSMS		JACB153_1	MDA-MB-231 R10K8	499.78	2	494.775	987.535	49421.6	-0.21688	0.35046	0.13358	494.775	499.779	25.409	12.468	0.77073	25.409	25.232	26.003	0		0	0	0	0.00091504	1	7365	106.2	75.635	1	56.548	7.3412	0
FDQLFDDESDPFEVLK	16	1	0	Unmodified	_FDQLFDDESDPFEVLK_			0	0	Q8NC51;Q8NC51-3;Q8NC51-2;Q8NC51-4	Q8NC51	Q8NC51	SERBP1	Plasminogen activator inhibitor 1 RNA-binding protein	>sp|Q8NC51|PAIRB_HUMAN Plasminogen activator inhibitor 1 RNA-binding protein OS=Homo sapiens GN=SERBP1 PE=1 SV=2;>sp|Q8NC51-3|PAIRB_HUMAN Isoform 3 of Plasminogen activator inhibitor 1 RNA-binding protein OS=Homo sapiens GN=SERBP1;>sp|Q8NC51-2|PAIRB_HUMAN	MULTI-MSMS		JACB153_1	MDA-MB-231 R10K8	976.46	2	972.449	1942.88	35802.7	-0.51598	0.026047	-0.48993	972.95	976.958	75.652	29.214	0.67557	75.652	75.367	76.042	0		0	0	0	1.5795e-06	2	26476	122.1	122.1	1	56.576	1.2111	0
IITITGTQDQIQNAQYLLQNSVK	23	1	0	Unmodified	_IITITGTQDQIQNAQYLLQNSVK_			0	0	P61978-3;Q5T6W5;P61978-2;P61978	P61978-3;P61978-2	P61978-2	HNRNPK	Heterogeneous nuclear ribonucleoprotein K	>sp|P61978-3|HNRPK_HUMAN Isoform 3 of Heterogeneous nuclear ribonucleoprotein K OS=Homo sapiens GN=HNRNPK;>tr|Q5T6W5|Q5T6W5_HUMAN Heterogeneous nuclear ribonucleoprotein K OS=Homo sapiens GN=HNRNPK PE=1 SV=1;>sp|P61978-2|HNRPK_HUMAN Isoform 2 of Heterogene	MULTI-MSMS		JACB153_1	MDA-MB-231 R10K8	866.81	3	863.801	2588.38	37389.9	-0.47808	-0.27338	-0.75146	864.135	866.806	66.82	26.269	0.87155	66.82	66.464	67.336	0		0	0	0	1.4224e-11	2	23208	126.61	126.61	1	56.609	0.84102	0
MVNHFIAEFK	10	1	0	Unmodified	_MVNHFIAEFK_			0	0	P11142;E9PKE3;P11142-2;E9PN89;A8K7Q2	P11142	P11142	HSPA8	Heat shock cognate 71 kDa protein	>sp|P11142|HSP7C_HUMAN Heat shock cognate 71 kDa protein OS=Homo sapiens GN=HSPA8 PE=1 SV=1;>tr|E9PKE3|E9PKE3_HUMAN Heat shock cognate 71 kDa protein OS=Homo sapiens GN=HSPA8 PE=1 SV=1;>sp|P11142-2|HSP7C_HUMAN Isoform 2 of Heat shock cognate 71 kDa protein	MULTI-MSMS		JACB153_1	MDA-MB-231 R10K8	415.22	3	412.546	1234.62	53991.1	-0.095388	0.021946	-0.073443	412.546	415.218	36.108	16.033	0.79145	36.108	35.787	36.579	0		0	0	0	0.006378	1	11675	76.332	76.332	1	56.702	1.1359	0
FIIPQIVK	8	1	0	Unmodified	_FIIPQIVK_			0	0	P07195;A8MW50;C9J7H8	P07195	P07195	LDHB	L-lactate dehydrogenase B chain;L-lactate dehydrogenase	>sp|P07195|LDHB_HUMAN L-lactate dehydrogenase B chain OS=Homo sapiens GN=LDHB PE=1 SV=2;>tr|A8MW50|A8MW50_HUMAN L-lactate dehydrogenase (Fragment) OS=Homo sapiens GN=LDHB PE=1 SV=1;>tr|C9J7H8|C9J7H8_HUMAN L-lactate dehydrogenase B chain (Fragment) OS=Homo	MULTI-MSMS		JACB153_1	MDA-MB-231 R10K8	483.32	2	479.31	956.606	50744.6	0.34447	-0.038155	0.30632	479.31	483.317	54.16	22.056	0.94943	54.16	53.891	54.84	0		0	0	0	0.0061547	1	18631	82.671	70.445	1	57.006	0.87846	0
LITPAVVSER	10	0	1	Unmodified	_LITPAVVSER_			0	0	P62851	P62851	P62851	RPS25	40S ribosomal protein S25	>sp|P62851|RS25_HUMAN 40S ribosomal protein S25 OS=Homo sapiens GN=RPS25 PE=1 SV=1	MULTI-MSMS		JACB153_1	MDA-MB-231 R10K8	547.83	2	542.822	1083.63	47280.2	0.12889	-0.17049	-0.041604	542.82	547.826	35.901	15.97	1.0512	35.901	35.372	36.423	0		0	0	0	0.0023566	1	11526	90.05	46.743	1	57.009	7.4011	0
SLTNDWEDHLAVK	13	1	0	Unmodified	_SLTNDWEDHLAVK_			0	0	P07900-2;P07900;Q86U12;P08238	P07900-2;P08238	P07900-2	HSP90AA1;HSP90AB1	Heat shock protein HSP 90-alpha;Heat shock protein HSP 90-beta	>sp|P07900-2|HS90A_HUMAN Isoform 2 of Heat shock protein HSP 90-alpha OS=Homo sapiens GN=HSP90AA1;>sp|P07900|HS90A_HUMAN Heat shock protein HSP 90-alpha OS=Homo sapiens GN=HSP90AA1 PE=1 SV=5;>tr|Q86U12|Q86U12_HUMAN Full-length cDNA clone CS0CAP007YF18 of T	MULTI-MSMS		JACB153_1	MDA-MB-231 R10K8	509.92	3	509.919	1526.74	48790.6	0.27823	0.26012	0.53835	509.92	512.591	41.649	17.879	1.4049	41.649	41.073	42.477	-3.8147e-06		0	0	0	0.00011978	3	13902	113.65	113.65	1	57.089	0.54522	0
EAFQLFDR	8	0	1	Unmodified	_EAFQLFDR_			0	0	B7Z6Z4;G3V1V0;G8JLA2;J3KND3;P60660;P60660-2;F8W1R7;G3V1Y7	B7Z6Z4	B7Z6Z4	MYL6	Myosin light polypeptide 6	>tr|B7Z6Z4|B7Z6Z4_HUMAN Myosin light polypeptide 6 OS=Homo sapiens GN=MYL6 PE=1 SV=1;>tr|G3V1V0|G3V1V0_HUMAN Myosin light polypeptide 6 OS=Homo sapiens GN=MYL6 PE=1 SV=1;>tr|G8JLA2|G8JLA2_HUMAN Myosin light polypeptide 6 OS=Homo sapiens GN=MYL6 PE=1 SV=1;>	MULTI-MSMS		JACB153_1	MDA-MB-231 R10K8	518.26	2	513.256	1024.5	48802.3	0.75603	-0.64499	0.11104	513.256	518.26	49.056	20.349	0.72312	49.056	48.773	49.496	0		0	0	0	0.0025304	1	16701	99.139	99.139	1	57.233	7.4302	0
HLIPAANTGESK	12	1	0	Unmodified	_HLIPAANTGESK_			0	0	P62258;P62258-2	P62258	P62258	YWHAE	14-3-3 protein epsilon	>sp|P62258|1433E_HUMAN 14-3-3 protein epsilon OS=Homo sapiens GN=YWHAE PE=1 SV=1;>sp|P62258-2|1433E_HUMAN Isoform SV of 14-3-3 protein epsilon OS=Homo sapiens GN=YWHAE	MULTI-MSMS		JACB153_1	MDA-MB-231 R10K8	623.34	2	619.33	1236.65	44662.8	-0.84738	0.67309	-0.17429	619.332	623.338	17.419	9.8055	0.58101	17.419	17.237	17.818	0		0	0	0	0.00018712	1	4297	116.24	116.24	1	57.353	1.2519	0
LAPITSDPTEATAVGAVEASFK	22	1	0	Unmodified	_LAPITSDPTEATAVGAVEASFK_			0	0	P14618;P14618-3	P14618	P14618	PKM2	Pyruvate kinase isozymes M1/M2	>sp|P14618|KPYM_HUMAN Pyruvate kinase PKM OS=Homo sapiens GN=PKM PE=1 SV=4;>sp|P14618-3|KPYM_HUMAN Isoform 3 of Pyruvate kinase PKM OS=Homo sapiens GN=PKM	MULTI-MSMS		JACB153_1	MDA-MB-231 R10K8	1092.57	2	1088.06	2174.11	33981.5	-0.32406	-0.18887	-0.51292	1088.56	1092.57	63.243	25.079	1.1846	63.243	62.954	64.138	-3.8147e-06		0	0	0	5.7803e-18	3	21912	160.67	160.67	1	57.682	0.72532	0
HFCPNVPIILVGNK	14	1	0	Unmodified	_HFCPNVPIILVGNK_			0	0	P08134;Q5JR08;E9PQH6;Q5JR05;Q5JR07;P61586;C9JX21;C9JNR4	P08134;P61586	P61586	RHOC;RHOA	Rho-related GTP-binding protein RhoC;Transforming protein RhoA	>sp|P08134|RHOC_HUMAN Rho-related GTP-binding protein RhoC OS=Homo sapiens GN=RHOC PE=1 SV=1;>tr|Q5JR08|Q5JR08_HUMAN Rho-related GTP-binding protein RhoC (Fragment) OS=Homo sapiens GN=RHOC PE=1 SV=2;>tr|E9PQH6|E9PQH6_HUMAN Rho-related GTP-binding protein R	MULTI-MSMS		JACB153_1	MDA-MB-231 R10K8	539.3	3	536.629	1606.87	47111.2	0.36659	0.1581	0.5247	536.964	539.301	48.489	20.167	0.58439	48.489	48.188	48.773	0		0	0	0	0.00025801	1	16487	93.011	90.649	1	57.822	1.1453	0
GVDEATIIDILTK	13	1	0	Unmodified	_GVDEATIIDILTK_			0	0	P04083;Q5T3N1;Q5T3N0	P04083	P04083	ANXA1	Annexin A1;Annexin	>sp|P04083|ANXA1_HUMAN Annexin A1 OS=Homo sapiens GN=ANXA1 PE=1 SV=2;>tr|Q5T3N1|Q5T3N1_HUMAN Annexin (Fragment) OS=Homo sapiens GN=ANXA1 PE=1 SV=1;>tr|Q5T3N0|Q5T3N0_HUMAN Annexin (Fragment) OS=Homo sapiens GN=ANXA1 PE=1 SV=1	MULTI-MSMS		JACB153_1	MDA-MB-231 R10K8	698.4	2	694.388	1386.76	41866	-0.044767	-4.2077e-05	-0.044809	694.389	698.395	72.844	28.277	0.55907	72.844	72.569	73.128	0		0	0	0	2.4297e-05	1	25361	145.6	145.6	1	57.838	0.94743	0
FNAHGDANTIVCNSK	15	1	0	Unmodified	_FNAHGDANTIVCNSK_			0	0	P09382	P09382	P09382	LGALS1	Galectin-1	>sp|P09382|LEG1_HUMAN Galectin-1 OS=Homo sapiens GN=LGALS1 PE=1 SV=2	MULTI-MSMS		JACB153_1	MDA-MB-231 R10K8	552.59	3	549.923	1646.75	46270.4	-0.11121	-0.080559	-0.19177	550.26	552.595	21.14	11.05	0.48855	21.14	20.964	21.453	0		0	0	0	0.0031107	1	5681	95.57	67.762	1	57.917	0.82415	0
NFSDNQLQEGK	11	1	0	Unmodified	_NFSDNQLQEGK_			0	0	P37802;X6RJP6	P37802	P37802	TAGLN2	Transgelin-2	>sp|P37802|TAGL2_HUMAN Transgelin-2 OS=Homo sapiens GN=TAGLN2 PE=1 SV=3;>tr|X6RJP6|X6RJP6_HUMAN Transgelin-2 (Fragment) OS=Homo sapiens GN=TAGLN2 PE=4 SV=1	MULTI-MSMS		JACB153_1	MDA-MB-231 R10K8	644.31	2	640.299	1278.58	43650.9	-0.68287	-0.26245	-0.94532	640.299	644.306	23.566	11.855	0.62594	23.566	23.359	23.985	0		0	0	0	0.00057722	2	6611	113.69	113.69	1	58.065	1.0212	0
VLQALEGLK	9	1	0	Unmodified	_VLQALEGLK_			0	0	P39019	P39019	P39019	RPS19	40S ribosomal protein S19	>sp|P39019|RS19_HUMAN 40S ribosomal protein S19 OS=Homo sapiens GN=RPS19 PE=1 SV=2	MULTI-MSMS		JACB153_1	MDA-MB-231 R10K8	489.81	2	485.8	969.586	50183.7	0.24129	-0.10472	0.13657	485.8	489.807	40.343	17.444	0.57337	40.343	40.083	40.657	-3.8147e-06		0	0	0	0.00086771	1	13335	109.29	66.207	1	58.625	1.2022	0
GGGGNFGPGPGSNFR	15	0	1	Unmodified	_GGGGNFGPGPGSNFR_			0	0	P22626;P22626-2	P22626	P22626	HNRNPA2B1	Heterogeneous nuclear ribonucleoproteins A2/B1	>sp|P22626|ROA2_HUMAN Heterogeneous nuclear ribonucleoproteins A2/B1 OS=Homo sapiens GN=HNRNPA2B1 PE=1 SV=2;>sp|P22626-2|ROA2_HUMAN Isoform A2 of Heterogeneous nuclear ribonucleoproteins A2/B1 OS=Homo sapiens GN=HNRNPA2B1	MULTI-MSMS		JACB153_1	MDA-MB-231 R10K8	694.32	2	689.318	1376.62	41251.5	-0.56277	0.22117	-0.3416	689.319	694.322	29.758	13.924	0.71232	29.758	29.391	30.104	0		0	0	0	0.0005509	1	9097	89.992	89.992	1	59.035	7.6641	0
EILVGDVGQTVDDPYATFVK	20	1	0	Unmodified	_EILVGDVGQTVDDPYATFVK_			0	0	E9PK25;P23528;G3V1A4;E9PP50;E9PQB7;E9PS23;E9PLJ3	E9PK25	E9PK25	CFL1	Cofilin-1	>tr|E9PK25|E9PK25_HUMAN Cofilin-1 OS=Homo sapiens GN=CFL1 PE=1 SV=1;>sp|P23528|COF1_HUMAN Cofilin-1 OS=Homo sapiens GN=CFL1 PE=1 SV=3;>tr|G3V1A4|G3V1A4_HUMAN Cofilin 1 (Non-muscle), isoform CRA_a OS=Homo sapiens GN=CFL1 PE=1 SV=1;>tr|E9PP50|E9PP50_HUMAN Co	MULTI-MSMS		JACB153_1	MDA-MB-231 R10K8	1088.06	2	1083.55	2165.09	34108.8	-0.36736	-0.28489	-0.65225	1084.05	1088.06	65.128	25.714	0.54228	65.128	64.906	65.449	0		0	0	0	4.5736e-14	1	22609	179.46	179.46	1	59.673	0.8831	0
GFSTWLK	7	1	0	Unmodified	_GFSTWLK_			0	0	P26038;V9GZ54	P26038	P26038	MSN	Moesin	>sp|P26038|MOES_HUMAN Moesin OS=Homo sapiens GN=MSN PE=1 SV=3;>tr|V9GZ54|V9GZ54_HUMAN Moesin (Fragment) OS=Homo sapiens GN=MSN PE=1 SV=1	MULTI-MSMS		JACB153_1	MDA-MB-231 R10K8	423.73	2	419.727	837.438	53027.6	0.24119	-0.055309	0.18588	419.726	423.734	43.161	18.385	0.81902	43.161	42.88	43.699	0		0	0	0	0.029719	1	14459	58.981	58.981	1	59.707	1.235	0
AQMVQEDLEK	10	1	0	Unmodified	_AQMVQEDLEK_			0	0	P26038	P26038	P26038	MSN	Moesin	>sp|P26038|MOES_HUMAN Moesin OS=Homo sapiens GN=MSN PE=1 SV=3	MULTI-MSMS		JACB153_1	MDA-MB-231 R10K8	599.8	2	595.79	1189.56	44922.2	-0.50806	-0.19076	-0.69882	595.79	599.797	25.161	12.388	0.43142	25.161	24.96	25.391	-1.9073e-06		0	0	0	0.00079416	1	7265	126.39	112.8	1	59.784	1.1247	0
VVIGMDVAASEFFR	14	0	1	Unmodified	_VVIGMDVAASEFFR_			0	0	P06733;P06733-2	P06733	P06733	ENO1	Alpha-enolase	>sp|P06733|ENOA_HUMAN Alpha-enolase OS=Homo sapiens GN=ENO1 PE=1 SV=2;>sp|P06733-2|ENOA_HUMAN Isoform MBP-1 of Alpha-enolase OS=Homo sapiens GN=ENO1	MULTI-MSMS		JACB153_1	MDA-MB-231 R10K8	775.9	2	770.895	1539.78	39845.5	-0.62555	0.074373	-0.55118	770.895	775.899	68.673	26.886	2.3214	68.673	68.038	70.359	0		0	0	0	4.0576e-07	5	23915	161.21	152.38	1	60.084	7.8003	0
VDIDVPDVDVQGPDWHLK	18	1	0	Unmodified	_VDIDVPDVDVQGPDWHLK_			0	0	Q09666	Q09666	Q09666	AHNAK	Neuroblast differentiation-associated protein AHNAK	>sp|Q09666|AHNK_HUMAN Neuroblast differentiation-associated protein AHNAK OS=Homo sapiens GN=AHNAK PE=1 SV=2	MULTI-MSMS		JACB153_1	MDA-MB-231 R10K8	685.68	3	683.009	2046.01	42594.1	-0.77551	0.19353	-0.58198	683.345	686.015	58.188	23.392	0.67442	58.188	57.787	58.461	0		0	0	0	3.8115e-07	1	20103	107.98	93.384	1	60.088	1.1744	0
DETEFYLGK	9	1	0	Unmodified	_DETEFYLGK_			0	0	P18077;C9K025;F8WB72;F8WBS5	P18077	P18077	RPL35A	60S ribosomal protein L35a	>sp|P18077|RL35A_HUMAN 60S ribosomal protein L35a OS=Homo sapiens GN=RPL35A PE=1 SV=2;>tr|C9K025|C9K025_HUMAN 60S ribosomal protein L35a (Fragment) OS=Homo sapiens GN=RPL35A PE=1 SV=1;>tr|F8WB72|F8WB72_HUMAN 60S ribosomal protein L35a OS=Homo sapiens GN=RP	MULTI-MSMS		JACB153_1	MDA-MB-231 R10K8	555.27	2	551.259	1100.5	46391.5	0.28301	-0.1501	0.13291	551.258	555.266	43.263	18.42	0.62469	43.263	43.044	43.669	0		0	0	0	0.0054088	1	14527	78.934	78.934	1	60.093	1.3722	0
SADTLWDIQK	10	1	0	Unmodified	_SADTLWDIQK_			0	0	P07195	P07195	P07195	LDHB	L-lactate dehydrogenase B chain	>sp|P07195|LDHB_HUMAN L-lactate dehydrogenase B chain OS=Homo sapiens GN=LDHB PE=1 SV=2	MULTI-MSMS		JACB153_1	MDA-MB-231 R10K8	592.81	2	588.798	1175.58	44677.9	-0.11797	-0.11934	-0.23731	588.798	592.805	44.746	18.916	0.99333	44.746	44.198	45.192	0		0	0	0	1.321e-05	1	15043	168.74	162.9	1	60.193	0.95352	0
LGGHGPSFPLK	11	1	0	Unmodified	_LGGHGPSFPLK_			0	0	P13010	P13010	P13010	XRCC5	X-ray repair cross-complementing protein 5	>sp|P13010|XRCC5_HUMAN X-ray repair cross-complementing protein 5 OS=Homo sapiens GN=XRCC5 PE=1 SV=3	MULTI-MSMS		JACB153_1	MDA-MB-231 R10K8	373.21	3	370.542	1108.6	55044.7	-0.21109	0.029233	-0.18185	370.543	373.213	27.446	13.15	0.44446	27.446	27.234	27.679	0		0	0	0	0.003085	1	8194	88.441	88.441	1	60.209	1.91	0
MTNYDVEHTIK	11	1	0	Unmodified	_MTNYDVEHTIK_			0	0	A6NN80;E5RK69;P08133;P08133-2;E7EMC6	A6NN80;P08133	A6NN80	ANXA6	Annexin;Annexin A6	>tr|A6NN80|A6NN80_HUMAN Annexin OS=Homo sapiens GN=ANXA6 PE=1 SV=3;>tr|E5RK69|E5RK69_HUMAN Annexin OS=Homo sapiens GN=ANXA6 PE=1 SV=1;>sp|P08133|ANXA6_HUMAN Annexin A6 OS=Homo sapiens GN=ANXA6 PE=1 SV=3;>sp|P08133-2|ANXA6_HUMAN Isoform 2 of Annexin A6 OS=H	MULTI-MSMS		JACB153_1	MDA-MB-231 R10K8	453.55	3	450.883	1349.63	51030.5	-0.29538	-0.37083	-0.6662	451.218	453.555	24.85	12.288	0.374	24.85	24.673	25.047	0		0	0	0	0.00067758	1	7148	103.91	101.38	1	60.313	1.8561	0
GDLGIEIPAEK	11	1	0	Unmodified	_GDLGIEIPAEK_			0	0	P14618;P14618-3;P30613;P30613-2;P14618-2;H3BTN5;Q504U3	P14618;P14618-2	P14618	PKM2;PKLR	Pyruvate kinase isozymes M1/M2;Pyruvate kinase isozymes R/L;Pyruvate kinase	>sp|P14618|KPYM_HUMAN Pyruvate kinase PKM OS=Homo sapiens GN=PKM PE=1 SV=4;>sp|P14618-3|KPYM_HUMAN Isoform 3 of Pyruvate kinase PKM OS=Homo sapiens GN=PKM;>sp|P30613|KPYR_HUMAN Pyruvate kinase PKLR OS=Homo sapiens GN=PKLR PE=1 SV=2;>sp|P30613-2|KPYR_HUMAN	MULTI-MSMS		JACB153_1	MDA-MB-231 R10K8	575.32	2	571.309	1140.6	45544.3	0.1106	-0.40694	-0.29634	571.309	575.316	44.181	18.728	0.79688	44.181	43.823	44.62	0		0	0	0	0.00070014	2	14911	101.71	62.532	1	60.369	0.62729	0
ENFQNWLK	8	1	0	Unmodified	_ENFQNWLK_			0	0	P37802;X6RJP6	P37802	P37802	TAGLN2	Transgelin-2	>sp|P37802|TAGL2_HUMAN Transgelin-2 OS=Homo sapiens GN=TAGLN2 PE=1 SV=3;>tr|X6RJP6|X6RJP6_HUMAN Transgelin-2 (Fragment) OS=Homo sapiens GN=TAGLN2 PE=4 SV=1	MULTI-MSMS		JACB153_1	MDA-MB-231 R10K8	543.78	2	539.769	1077.52	47767.2	0.32473	-0.22846	0.096274	539.77	543.776	46.105	19.364	0.68464	46.105	45.785	46.47	0		0	0	0	0.0048603	2	15734	86.794	86.794	1	60.372	0.9836	0
DATNVGDEGGFAPNILENK	19	1	0	Unmodified	_DATNVGDEGGFAPNILENK_			0	0	P06733;P06733-2	P06733	P06733	ENO1	Alpha-enolase	>sp|P06733|ENOA_HUMAN Alpha-enolase OS=Homo sapiens GN=ENO1 PE=1 SV=2;>sp|P06733-2|ENOA_HUMAN Isoform MBP-1 of Alpha-enolase OS=Homo sapiens GN=ENO1	MULTI-MSMS		JACB153_1	MDA-MB-231 R10K8	984.97	2	980.966	1959.92	35687.9	-0.85513	0.022862	-0.83226	980.968	984.973	54.647	22.216	0.60934	54.647	54.389	54.999	0		0	0	0	1.3683e-21	1	18798	244.52	244.52	1	60.504	0.79728	0
HQGVMVGMGQK	11	1	0	Unmodified	_HQGVMVGMGQK_			0	0	CON__P60712;P60709;E7EVS6;G5E9R0;C9JZR7;C9JUM1;C9JTX5;Q562R1;P68032;P68133;P62736;P63267;A6NL76;Q5T8M8;Q5T8M7;F6QUT6;F6UVQ4;C9JFL5;B8ZZJ2;F8WB63;P63261;I3L1U9;I3L3I0;J3KT65;I3L3R2;K7EM38	CON__P60712;P68032;P63261	CON__P60712	ACTB;ACTBL2;ACTC1;ACTA1;ACTA2;ACTG2;ACTG1	Actin, cytoplasmic 1;Actin, cytoplasmic 1, N-terminally processed;Beta-actin-like protein 2;Actin, alpha cardiac muscle 1;Actin, alpha skeletal muscle;Actin, aortic smooth muscle;Actin, gamma-enteric smooth muscle;Actin, cytoplasmic 2;Actin, cytoplasmic 2, N-terminally processed	>P60712 SWISS-PROT:P60712 (Bos taurus) Actin, cytoplasmic 1;>sp|P60709|ACTB_HUMAN Actin, cytoplasmic 1 OS=Homo sapiens GN=ACTB PE=1 SV=1;>tr|E7EVS6|E7EVS6_HUMAN Actin, cytoplasmic 1 (Fragment) OS=Homo sapiens GN=ACTB PE=1 SV=2;>tr|G5E9R0|G5E9R0_HUMAN Actin	MULTI-MSMS		JACB153_1	MDA-MB-231 R10K8	590.3	2	586.289	1170.56	45390	-0.409	-0.19671	-0.60571	586.29	590.297	17.741	9.9157	0.83067	17.741	17.502	18.332	0		0	0	0	4.679e-06	3	4412	175.86	175.86	1	60.643	0.95186	0
EMGTPDVR	8	0	1	Unmodified	_EMGTPDVR_			0	0	B7Z4C8;P62899-2;P62899;P62899-3;B7Z4E3;C9JU56;H7C2W9;B8ZZK4	B7Z4C8	B7Z4C8	RPL31	60S ribosomal protein L31	>tr|B7Z4C8|B7Z4C8_HUMAN 60S ribosomal protein L31 OS=Homo sapiens GN=RPL31 PE=1 SV=1;>sp|P62899-2|RL31_HUMAN Isoform 2 of 60S ribosomal protein L31 OS=Homo sapiens GN=RPL31;>sp|P62899|RL31_HUMAN 60S ribosomal protein L31 OS=Homo sapiens GN=RPL31 PE=1 SV=1;	MULTI-MSMS		JACB153_1	MDA-MB-231 R10K8	457.72	2	452.713	903.412	49636.5	-0.45021	-0.045071	-0.49528	452.713	457.718	20.809	10.932	0.49824	20.809	20.582	21.081	1.9073e-06		0	0	0	0.011194	1	5551	66.621	66.621	1	60.887	7.9046	0
NQVAMNPTNTVFDAK	15	1	0	Unmodified	_NQVAMNPTNTVFDAK_			0	0	P11142;E9PKE3;P11142-2;E9PNE6;E9PLF4;E9PQK7;E9PQQ4;E9PPY6;E9PN25;E9PK54	P11142;E9PK54	P11142	HSPA8	Heat shock cognate 71 kDa protein	>sp|P11142|HSP7C_HUMAN Heat shock cognate 71 kDa protein OS=Homo sapiens GN=HSPA8 PE=1 SV=1;>tr|E9PKE3|E9PKE3_HUMAN Heat shock cognate 71 kDa protein OS=Homo sapiens GN=HSPA8 PE=1 SV=1;>sp|P11142-2|HSP7C_HUMAN Isoform 2 of Heat shock cognate 71 kDa protein	MULTI-MSMS		JACB153_1	MDA-MB-231 R10K8	829.41	2	825.401	1648.79	38464.6	-0.59869	-0.68024	-1.2789	825.401	829.408	40.676	17.557	0.4567	40.676	40.456	40.913	0		0	0	0	5.3177e-12	2	13448	194.48	152.83	1	60.923	0.86122	0
SLVSVTK	7	1	0	Unmodified	_SLVSVTK_			0	0	P08238;Q58FF7;Q58FF8	P08238	P08238	HSP90AB1;HSP90AB3P;HSP90AB2P	Heat shock protein HSP 90-beta;Putative heat shock protein HSP 90-beta-3;Putative heat shock protein HSP 90-beta 2	>sp|P08238|HS90B_HUMAN Heat shock protein HSP 90-beta OS=Homo sapiens GN=HSP90AB1 PE=1 SV=4;>sp|Q58FF7|H90B3_HUMAN Putative heat shock protein HSP 90-beta-3 OS=Homo sapiens GN=HSP90AB3P PE=5 SV=1;>sp|Q58FF8|H90B2_HUMAN Putative heat shock protein HSP 90-be	MULTI-MSMS		JACB153_1	MDA-MB-231 R10K8	371.23	2	367.226	732.438	57006.1	0.15544	-0.065902	0.089535	367.226	371.233	21.422	11.138	0.4854	21.422	21.246	21.731	0		0	0	0	0.0068251	1	5813	111.01	21.458	1	60.96	1.4879	0
GAGTDDHTLIR	11	0	1	Unmodified	_GAGTDDHTLIR_			0	0	P08758;D6RBL5;D6RBE9	P08758	P08758	ANXA5	Annexin A5;Annexin	>sp|P08758|ANXA5_HUMAN Annexin A5 OS=Homo sapiens GN=ANXA5 PE=1 SV=2;>tr|D6RBL5|D6RBL5_HUMAN Annexin OS=Homo sapiens GN=ANXA5 PE=1 SV=1;>tr|D6RBE9|D6RBE9_HUMAN Annexin OS=Homo sapiens GN=ANXA5 PE=1 SV=1	MULTI-MSMS		JACB153_1	MDA-MB-231 R10K8	389.2	3	385.863	1154.57	55455.6	-0.20331	-0.24095	-0.44426	385.863	389.199	17.977	9.9883	0.78801	17.977	17.706	18.494	0		0	0	0	0.11766	1	4572	43.419	43.419	1	60.979	7.9165	0
FSMPGFK	7	1	0	Unmodified	_FSMPGFK_			0	0	Q09666	Q09666	Q09666	AHNAK	Neuroblast differentiation-associated protein AHNAK	>sp|Q09666|AHNK_HUMAN Neuroblast differentiation-associated protein AHNAK OS=Homo sapiens GN=AHNAK PE=1 SV=2	MULTI-MSMS		JACB153_1	MDA-MB-231 R10K8	411.21	2	407.202	812.389	52953.5	0.092729	-0.51567	-0.42294	407.202	411.209	43.881	18.625	1.0804	43.881	43.539	44.62	0		0	0	0	0.0073598	3	14692	94.887	94.887	1	61.019	0.91651	0
EIVHLQAGQCGNQIGAK	17	1	0	Unmodified	_EIVHLQAGQCGNQIGAK_			0	0	P68371;M0R2D3;M0QZL7;M0QY85;M0QX14;M0QY37;M0R0X0;M0R2T4;P04350;M0R278;M0QYM7;M0R042	P68371;P04350	P68371	TUBB4B;TUBB4A	Tubulin beta-4B chain;Tubulin beta-4A chain	>sp|P68371|TBB4B_HUMAN Tubulin beta-4B chain OS=Homo sapiens GN=TUBB4B PE=1 SV=1;>tr|M0R2D3|M0R2D3_HUMAN Tubulin beta-4A chain (Fragment) OS=Homo sapiens GN=TUBB4A PE=2 SV=1;>tr|M0QZL7|M0QZL7_HUMAN Tubulin beta-4A chain (Fragment) OS=Homo sapiens GN=TUBB4A	MULTI-MSMS		JACB153_1	MDA-MB-231 R10K8	610.98	3	608.312	1821.92	43999.3	-0.3522	-0.45541	-0.80761	608.647	610.984	27.113	13.036	0.35032	27.113	26.91	27.261	0		0	0	0	3.3954e-13	1	8055	195.54	0	1	61.182	0.8109	0
TAFQEALDAAGDK	13	1	0	Unmodified	_TAFQEALDAAGDK_			0	0	P10599;P10599-2	P10599	P10599	TXN	Thioredoxin	>sp|P10599|THIO_HUMAN Thioredoxin OS=Homo sapiens GN=TXN PE=1 SV=3;>sp|P10599-2|THIO_HUMAN Isoform 2 of Thioredoxin OS=Homo sapiens GN=TXN	MULTI-MSMS		JACB153_1	MDA-MB-231 R10K8	672.83	2	668.823	1335.63	42555.6	-0.45893	-1.13	-1.5889	668.822	672.829	42.422	18.138	0.63255	42.422	42.083	42.715	0		0	0	0	5.8303e-05	3	14108	128.96	125.62	1	61.269	0.629	0
DDGLFSGDPNWFPK	14	1	0	Unmodified	_DDGLFSGDPNWFPK_			0	0	P37802;X6RJP6	P37802	P37802	TAGLN2	Transgelin-2	>sp|P37802|TAGL2_HUMAN Transgelin-2 OS=Homo sapiens GN=TAGLN2 PE=1 SV=3;>tr|X6RJP6|X6RJP6_HUMAN Transgelin-2 (Fragment) OS=Homo sapiens GN=TAGLN2 PE=4 SV=1	MULTI-MSMS		JACB153_1	MDA-MB-231 R10K8	801.87	2	797.862	1593.71	38747.8	-0.44771	0.078263	-0.36945	797.862	801.87	71.663	27.888	0.83703	71.663	71.289	72.126	0		0	0	0	2.3649e-05	2	24936	121.56	121.56	1	61.382	1.1013	0
VLEALLPLK	9	1	0	Unmodified	_VLEALLPLK_			0	0	P49327	P49327	P49327	FASN	Fatty acid synthase;[Acyl-carrier-protein] S-acetyltransferase;[Acyl-carrier-protein] S-malonyltransferase;3-oxoacyl-[acyl-carrier-protein] synthase;3-oxoacyl-[acyl-carrier-protein] reductase;3-hydroxypalmitoyl-[acyl-carrier-protein] dehydratase;Enoyl-[acyl-carrier-protein] reductase;Oleoyl-[acyl-carrier-protein] hydrolase	>sp|P49327|FAS_HUMAN Fatty acid synthase OS=Homo sapiens GN=FASN PE=1 SV=3	MULTI-MSMS		JACB153_1	MDA-MB-231 R10K8	502.34	2	498.329	994.643	49719.2	0.27751	0.00064267	0.27815	498.329	502.336	56.292	22.763	0.45937	56.292	56.082	56.541	0		0	0	0	0.0008725	1	19426	108.98	94.859	1	61.518	1.5813	0
EGIPALDNFLDKL	13	1	0	Unmodified	_EGIPALDNFLDKL_			0	0	P13639	P13639	P13639	EEF2	Elongation factor 2	>sp|P13639|EF2_HUMAN Elongation factor 2 OS=Homo sapiens GN=EEF2 PE=1 SV=4	MULTI-MSMS		JACB153_1	MDA-MB-231 R10K8	726.89	2	722.888	1443.76	41070	0.0058922	-0.5012	-0.4953	723.39	726.895	81.831	31.276	1.3696	81.831	81.15	82.519	7.6294e-06		0	0	0	4.9343e-05	3	28668	130.69	113.1	1	61.815	1.5556	0
ALVATPGK	8	1	0	Unmodified	_ALVATPGK_			0	0	P19338;C9JWL1;C9J1H7;C9JLB1;C9JYW2	P19338	P19338	NCL	Nucleolin	>sp|P19338|NUCL_HUMAN Nucleolin OS=Homo sapiens GN=NCL PE=1 SV=3;>tr|C9JWL1|C9JWL1_HUMAN Nucleolin (Fragment) OS=Homo sapiens GN=NCL PE=1 SV=1;>tr|C9J1H7|C9J1H7_HUMAN Nucleolin (Fragment) OS=Homo sapiens GN=NCL PE=1 SV=1;>tr|C9JLB1|C9JLB1_HUMAN Nucleolin (	MULTI-MSMS		JACB153_1	MDA-MB-231 R10K8	382.74	2	378.734	755.454	55811.6	0.066218	-0.027912	0.038306	378.734	382.741	19.707	10.567	0.46848	19.707	19.422	19.891	0		0	0	0	0.0020597	1	5143	121.62	62.414	1	61.865	2.1912	0
LNFSHGTHEYHAETIK	16	1	0	Unmodified	_LNFSHGTHEYHAETIK_			0	0	P14618;H3BQ34;H3BTJ2;H3BUW1;H3BT25;P14618-2;H3BTN5	P14618;P14618-2	P14618	PKM2	Pyruvate kinase isozymes M1/M2;Pyruvate kinase	>sp|P14618|KPYM_HUMAN Pyruvate kinase PKM OS=Homo sapiens GN=PKM PE=1 SV=4;>tr|H3BQ34|H3BQ34_HUMAN Pyruvate kinase OS=Homo sapiens GN=PKM PE=1 SV=1;>tr|H3BTJ2|H3BTJ2_HUMAN Pyruvate kinase PKM (Fragment) OS=Homo sapiens GN=PKM PE=1 SV=1;>tr|H3BUW1|H3BUW1_HU	MULTI-MSMS		JACB153_1	MDA-MB-231 R10K8	379.19	5	377.587	1882.9	57100.2	0.16464	-0.25717	-0.092526	377.587	379.39	19.462	10.49	0.78511	19.462	19.229	20.015	0		0	0	0	0.00116	1	5039	82.59	78.757	1	61.893	1.1497	0
QVQSLTCEVDALK	13	1	0	Unmodified	_QVQSLTCEVDALK_			0	0	P08670;B0YJC4;B0YJC5;Q5JVS8	P08670	P08670	VIM	Vimentin	>sp|P08670|VIME_HUMAN Vimentin OS=Homo sapiens GN=VIM PE=1 SV=4;>tr|B0YJC4|B0YJC4_HUMAN Vimentin OS=Homo sapiens GN=VIM PE=1 SV=1;>tr|B0YJC5|B0YJC5_HUMAN Vimentin OS=Homo sapiens GN=VIM PE=1 SV=1;>tr|Q5JVS8|Q5JVS8_HUMAN Vimentin (Fragment) OS=Homo sapiens	MULTI-MSMS		JACB153_1	MDA-MB-231 R10K8	749.89	2	745.88	1489.74	40634.4	-0.40114	-0.53693	-0.93807	746.382	749.887	42.799	18.265	0.55701	42.799	42.526	43.083	0		0	0	0	1.7388e-06	3	14424	159.5	159.5	1	61.902	0.563	0
EILVGDVGQTVDDPYATFVK	20	1	0	Unmodified	_EILVGDVGQTVDDPYATFVK_			0	0	E9PK25;P23528;G3V1A4;E9PP50;E9PQB7;E9PS23;E9PLJ3	E9PK25	E9PK25	CFL1	Cofilin-1	>tr|E9PK25|E9PK25_HUMAN Cofilin-1 OS=Homo sapiens GN=CFL1 PE=1 SV=1;>sp|P23528|COF1_HUMAN Cofilin-1 OS=Homo sapiens GN=CFL1 PE=1 SV=3;>tr|G3V1A4|G3V1A4_HUMAN Cofilin 1 (Non-muscle), isoform CRA_a OS=Homo sapiens GN=CFL1 PE=1 SV=1;>tr|E9PP50|E9PP50_HUMAN Co	MULTI-MSMS		JACB153_1	MDA-MB-231 R10K8	725.71	3	722.704	2165.09	41101.6	0.089751	-0.38297	-0.29322	722.704	725.709	65.133	25.714	0.53009	65.133	64.867	65.397	0		0	0	0	3.0578e-11	2	22610	132.59	132.59	1	62.136	1.0305	0
STGGAPTFNVTVTK	14	1	0	Unmodified	_STGGAPTFNVTVTK_			0	0	P07737;K7EJ44	P07737	P07737	PFN1	Profilin-1	>sp|P07737|PROF1_HUMAN Profilin-1 OS=Homo sapiens GN=PFN1 PE=1 SV=2;>tr|K7EJ44|K7EJ44_HUMAN Profilin 1, isoform CRA_b OS=Homo sapiens GN=PFN1 PE=1 SV=1	MULTI-MSMS		JACB153_1	MDA-MB-231 R10K8	694.37	2	690.362	1378.71	42196.2	-0.52313	-0.17678	-0.69991	690.362	694.369	35.924	15.976	0.83688	35.924	35.616	36.453	0		0	0	0	1.4487e-05	3	11554	128.96	128.96	1	62.145	0.58212	0
TLNDELEIIEGMK	13	1	0	Unmodified	_TLNDELEIIEGMK_			0	0	P10809;E7ESH4;E7EXB4	P10809	P10809	HSPD1	60 kDa heat shock protein, mitochondrial	>sp|P10809|CH60_HUMAN 60 kDa heat shock protein, mitochondrial OS=Homo sapiens GN=HSPD1 PE=1 SV=2;>tr|E7ESH4|E7ESH4_HUMAN 60 kDa heat shock protein, mitochondrial (Fragment) OS=Homo sapiens GN=HSPD1 PE=1 SV=1;>tr|E7EXB4|E7EXB4_HUMAN 60 kDa heat shock prote	MULTI-MSMS		JACB153_1	MDA-MB-231 R10K8	756.89	2	752.882	1503.75	39405.3	-0.26705	0.39529	0.12824	752.882	756.89	63.87	25.295	1.1458	63.87	63.25	64.396	0		0	0	0	7.9377e-07	2	22145	174.94	174.94	1	62.186	1.4429	0
AVTEQGAELSNEER	14	0	1	Unmodified	_AVTEQGAELSNEER_			0	0	P27348;E9PG15	P27348	P27348	YWHAQ	14-3-3 protein theta	>sp|P27348|1433T_HUMAN 14-3-3 protein theta OS=Homo sapiens GN=YWHAQ PE=1 SV=1;>tr|E9PG15|E9PG15_HUMAN 14-3-3 protein theta (Fragment) OS=Homo sapiens GN=YWHAQ PE=1 SV=1	MULTI-MSMS		JACB153_1	MDA-MB-231 R10K8	771.87	2	766.863	1531.71	39703	-0.88161	0.11532	-0.76629	766.863	771.867	22.448	11.481	0.42387	22.448	22.254	22.678	0		0	0	0	7.6052e-11	1	6176	210.14	194.2	1	62.42	8.1036	0
LSLEGDHSTPPSAYGSVK	18	1	0	Unmodified	_LSLEGDHSTPPSAYGSVK_			0	0	P07355-2;P07355;H0YN42;A6NMY6;H0YMU9;H0YMD0;H0YKS4;H0YMM1;H0YMW4;H0YKX9;H0YMT9;H0YLV6;H0YKZ7;H0YKL9;H0YKV8;H0YMD9;H0YKN4;H0YNB8	P07355-2	P07355-2	ANXA2;ANXA2P2	Annexin A2;Annexin;Putative annexin A2-like protein	>sp|P07355-2|ANXA2_HUMAN Isoform 2 of Annexin A2 OS=Homo sapiens GN=ANXA2;>sp|P07355|ANXA2_HUMAN Annexin A2 OS=Homo sapiens GN=ANXA2 PE=1 SV=2;>tr|H0YN42|H0YN42_HUMAN Annexin (Fragment) OS=Homo sapiens GN=ANXA2 PE=1 SV=1;>sp|A6NMY6|AXA2L_HUMAN Putative ann	MULTI-MSMS		JACB153_1	MDA-MB-231 R10K8	618.31	3	615.639	1843.9	44436.8	-0.30872	-0.27843	-0.58714	615.973	618.31	31.198	14.401	1.2601	31.198	30.446	31.706	-1.9073e-06		0	0	0	7.6412e-13	3	9819	160.25	160.25	1	62.605	0.72571	0
LLIVSNPVDILTYVAWK	17	1	0	Unmodified	_LLIVSNPVDILTYVAWK_			0	0	P00338-3;P00338;P00338-2;P00338-5;F5GXY2	P00338-3	P00338-3	LDHA	L-lactate dehydrogenase A chain	>sp|P00338-3|LDHA_HUMAN Isoform 3 of L-lactate dehydrogenase A chain OS=Homo sapiens GN=LDHA;>sp|P00338|LDHA_HUMAN L-lactate dehydrogenase A chain OS=Homo sapiens GN=LDHA PE=1 SV=2;>sp|P00338-2|LDHA_HUMAN Isoform 2 of L-lactate dehydrogenase A chain OS=Hom	MULTI-MSMS		JACB153_1	MDA-MB-231 R10K8	651.72	3	648.712	1943.11	43663.9	-0.25861	0.011023	-0.24759	649.046	651.717	91.941	34.648	1.5223	91.941	91.487	93.009	0		0	0	0	1.9576e-08	4	32095	128.9	0	1	62.63	1.13	0
LLIHQSLAGGIIGVK	15	1	0	Unmodified	_LLIHQSLAGGIIGVK_			0	0	P61978-3;Q5T6W5;Q5T6W2;P61978-2;P61978;Q5T6W1	P61978-3;P61978-2	P61978-2	HNRNPK	Heterogeneous nuclear ribonucleoprotein K	>sp|P61978-3|HNRPK_HUMAN Isoform 3 of Heterogeneous nuclear ribonucleoprotein K OS=Homo sapiens GN=HNRNPK;>tr|Q5T6W5|Q5T6W5_HUMAN Heterogeneous nuclear ribonucleoprotein K OS=Homo sapiens GN=HNRNPK PE=1 SV=1;>tr|Q5T6W2|Q5T6W2_HUMAN Heterogeneous nuclear ri	MULTI-MSMS		JACB153_1	MDA-MB-231 R10K8	509.66	3	506.984	1517.93	49222.3	0.3157	0.19048	0.50618	507.318	509.655	45.73	19.247	0.73833	45.73	45.47	46.209	0		0	0	0	3.0309e-07	1	15477	127.71	127.71	1	62.7	1.178	0
TPAQYDASELK	11	1	0	Unmodified	_TPAQYDASELK_			0	0	P07355-2;P07355;H0YN42;A6NMY6;H0YMU9;H0YMD0;H0YM50;H0YKS4;H0YNP5;H0YMM1;H0YMW4;H0YKX9;H0YMT9;H0YLV6;H0YKZ7	P07355-2	P07355-2	ANXA2;ANXA2P2	Annexin A2;Annexin;Putative annexin A2-like protein	>sp|P07355-2|ANXA2_HUMAN Isoform 2 of Annexin A2 OS=Homo sapiens GN=ANXA2;>sp|P07355|ANXA2_HUMAN Annexin A2 OS=Homo sapiens GN=ANXA2 PE=1 SV=2;>tr|H0YN42|H0YN42_HUMAN Annexin (Fragment) OS=Homo sapiens GN=ANXA2 PE=1 SV=1;>sp|A6NMY6|AXA2L_HUMAN Putative ann	MULTI-MSMS		JACB153_1	MDA-MB-231 R10K8	615.81	2	611.801	1221.59	44670	-0.59109	0.33994	-0.25115	611.802	615.808	25.621	12.541	0.72174	25.621	25.391	26.113	1.9073e-06		0	0	0	5.0518e-09	3	7426	192.68	192.68	1	62.737	0.80521	0
ADLINNLGTIAK	12	1	0	Unmodified	_ADLINNLGTIAK_			0	0	P07900-2;P07900;Q14568;P08238;Q58FF8	P07900-2;P08238	P07900-2	HSP90AA1;HSP90AA2;HSP90AB1;HSP90AB2P	Heat shock protein HSP 90-alpha;Putative heat shock protein HSP 90-alpha A2;Heat shock protein HSP 90-beta;Putative heat shock protein HSP 90-beta 2	>sp|P07900-2|HS90A_HUMAN Isoform 2 of Heat shock protein HSP 90-alpha OS=Homo sapiens GN=HSP90AA1;>sp|P07900|HS90A_HUMAN Heat shock protein HSP 90-alpha OS=Homo sapiens GN=HSP90AA1 PE=1 SV=5;>sp|Q14568|HS902_HUMAN Putative heat shock protein HSP 90-alpha A	MULTI-MSMS		JACB153_1	MDA-MB-231 R10K8	625.86	2	621.856	1241.7	43823.2	-0.18168	-0.20832	-0.39	621.857	625.863	48.468	20.158	0.52436	48.468	48.218	48.742	0		0	0	0	0.00020218	2	16465	114.24	114.24	1	62.913	0.556	0
TAFDEAIAELDTLSEESYK	19	1	0	Unmodified	_TAFDEAIAELDTLSEESYK_			0	0	P63104;E7EX29;B0AZS6;P63104-2;H0YB80;B7Z2E6	P63104	P63104	YWHAZ	14-3-3 protein zeta/delta	>sp|P63104|1433Z_HUMAN 14-3-3 protein zeta/delta OS=Homo sapiens GN=YWHAZ PE=1 SV=1;>tr|E7EX29|E7EX29_HUMAN 14-3-3 protein zeta/delta (Fragment) OS=Homo sapiens GN=YWHAZ PE=1 SV=1;>tr|B0AZS6|B0AZS6_HUMAN 14-3-3 protein zeta/delta OS=Homo sapiens GN=YWHAZ P	MULTI-MSMS		JACB153_1	MDA-MB-231 R10K8	1071.01	2	1066.5	2130.98	34186.8	-0.44555	-0.28075	-0.72629	1066.5	1071.01	83.679	31.893	1.0614	83.679	83.255	84.317	0		0	0	0	2.1159e-27	3	29254	260.29	260.29	1	62.955	1.0541	0
IILDLISESPIK	12	1	0	Unmodified	_IILDLISESPIK_			0	0	P61978-3;Q5T6W5;Q5T6W2;P61978-2;P61978;Q5T6W1	P61978-3;P61978-2	P61978-2	HNRNPK	Heterogeneous nuclear ribonucleoprotein K	>sp|P61978-3|HNRPK_HUMAN Isoform 3 of Heterogeneous nuclear ribonucleoprotein K OS=Homo sapiens GN=HNRNPK;>tr|Q5T6W5|Q5T6W5_HUMAN Heterogeneous nuclear ribonucleoprotein K OS=Homo sapiens GN=HNRNPK PE=1 SV=1;>tr|Q5T6W2|Q5T6W2_HUMAN Heterogeneous nuclear ri	MULTI-MSMS		JACB153_1	MDA-MB-231 R10K8	674.91	2	670.905	1339.8	43000.8	-0.32813	0.12067	-0.20746	670.906	674.913	65.97	25.99	1.0447	65.97	65.734	66.779	0		0	0	0	0.00011925	2	22902	125.28	125.28	1	62.967	1.1034	0
LICCDILDVLDK	12	1	0	Unmodified	_LICCDILDVLDK_			0	0	P62258;P62258-2;K7EIT4	P62258	P62258	YWHAE	14-3-3 protein epsilon	>sp|P62258|1433E_HUMAN 14-3-3 protein epsilon OS=Homo sapiens GN=YWHAE PE=1 SV=1;>sp|P62258-2|1433E_HUMAN Isoform SV of 14-3-3 protein epsilon OS=Homo sapiens GN=YWHAE;>tr|K7EIT4|K7EIT4_HUMAN 14-3-3 protein epsilon (Fragment) OS=Homo sapiens GN=YWHAE PE=1	MULTI-MSMS		JACB153_1	MDA-MB-231 R10K8	742.88	2	738.875	1475.74	40436.4	-0.34158	-0.69133	-1.0329	738.875	742.882	68.525	26.837	0.83752	68.525	68.244	69.082	0		0	0	0	0.00012902	3	23937	123.95	123.95	1	63.016	0.84528	0
SALSGHLETVILGLLK	16	1	0	Unmodified	_SALSGHLETVILGLLK_			0	0	P07355-2;P07355;H0YN42;A6NMY6;H0YMU9;H0YMD0;H0YM50;H0YKS4;H0YNP5;H0YMM1;H0YMW4;H0YKX9;H0YMT9;H0YLV6;H0YKZ7;H0YKL9	P07355-2	P07355-2	ANXA2;ANXA2P2	Annexin A2;Annexin;Putative annexin A2-like protein	>sp|P07355-2|ANXA2_HUMAN Isoform 2 of Annexin A2 OS=Homo sapiens GN=ANXA2;>sp|P07355|ANXA2_HUMAN Annexin A2 OS=Homo sapiens GN=ANXA2 PE=1 SV=2;>tr|H0YN42|H0YN42_HUMAN Annexin (Fragment) OS=Homo sapiens GN=ANXA2 PE=1 SV=1;>sp|A6NMY6|AXA2L_HUMAN Putative ann	MULTI-MSMS		JACB153_1	MDA-MB-231 R10K8	553.67	3	550.998	1649.97	46937.5	0.44953	-0.14893	0.3006	550.998	553.669	72.373	28.124	1.758	72.373	71.817	73.575	0		0	0	0	8.7247e-08	5	25254	140.96	140.96	1	63.121	0.92361	0
GVNLPGAAVDLPAVSEK	17	1	0	Unmodified	_GVNLPGAAVDLPAVSEK_			0	0	P14618;P14618-3;H3BQ34;P14618-2;H3BTN5;Q504U3	P14618;P14618-2	P14618	PKM2	Pyruvate kinase isozymes M1/M2;Pyruvate kinase	>sp|P14618|KPYM_HUMAN Pyruvate kinase PKM OS=Homo sapiens GN=PKM PE=1 SV=4;>sp|P14618-3|KPYM_HUMAN Isoform 3 of Pyruvate kinase PKM OS=Homo sapiens GN=PKM;>tr|H3BQ34|H3BQ34_HUMAN Pyruvate kinase OS=Homo sapiens GN=PKM PE=1 SV=1;>sp|P14618-2|KPYM_HUMAN Isof	MULTI-MSMS		JACB153_1	MDA-MB-231 R10K8	822.96	2	818.949	1635.88	38754.8	-0.56969	-0.27974	-0.84943	819.45	822.956	53.219	21.743	0.61016	53.219	52.988	53.598	3.8147e-06		0	0	0	1.8547e-08	2	18272	130.4	130.4	1	63.129	0.88414	0
AMVSEFLK	8	1	0	Acetyl (Protein N-term)	_(ac)AMVSEFLK_			1	0	P04083;Q5T3N1;Q5T3N0	P04083	P04083	ANXA1	Annexin A1;Annexin	>sp|P04083|ANXA1_HUMAN Annexin A1 OS=Homo sapiens GN=ANXA1 PE=1 SV=2;>tr|Q5T3N1|Q5T3N1_HUMAN Annexin (Fragment) OS=Homo sapiens GN=ANXA1 PE=1 SV=1;>tr|Q5T3N0|Q5T3N0_HUMAN Annexin (Fragment) OS=Homo sapiens GN=ANXA1 PE=1 SV=1	MULTI-MSMS		JACB153_1	MDA-MB-231 R10K8	487.76	2	483.752	965.489	48816.9	0.64025	-0.74863	-0.10838	483.752	487.759	73.724	28.571	0.7534	73.724	73.451	74.205	0		0	0	0	0.004046	2	25786	84.476	63.574	1	63.153	1.3282	0
EDMAALEK	8	1	0	Unmodified	_EDMAALEK_			0	0	Q71U36;Q71U36-2;F5H5D3;Q9BQE3;P68366;A8MUB1;P68363	Q71U36;F5H5D3;P68366;P68363	P68363	TUBA1A;TUBA1C;TUBA4A;TUBA1B	Tubulin alpha-1A chain;Tubulin alpha-1C chain;Tubulin alpha-4A chain;Tubulin alpha-1B chain	>sp|Q71U36|TBA1A_HUMAN Tubulin alpha-1A chain OS=Homo sapiens GN=TUBA1A PE=1 SV=1;>sp|Q71U36-2|TBA1A_HUMAN Isoform 2 of Tubulin alpha-1A chain OS=Homo sapiens GN=TUBA1A;>tr|F5H5D3|F5H5D3_HUMAN Tubulin alpha-1C chain OS=Homo sapiens GN=TUBA1C PE=1 SV=1;>sp|	MULTI-MSMS		JACB153_1	MDA-MB-231 R10K8	457.72	2	453.715	905.416	51402.9	-0.34911	0.13006	-0.21905	453.716	457.723	24.086	12.031	0.77088	24.086	23.859	24.629	1.9073e-06		0	0	0	0.010898	1	6810	67.563	35.342	1	63.174	0.93685	0
ILGPGLNK	8	1	0	Unmodified	_ILGPGLNK_			0	0	P62906	P62906	P62906	RPL10A	60S ribosomal protein L10a	>sp|P62906|RL10A_HUMAN 60S ribosomal protein L10a OS=Homo sapiens GN=RPL10A PE=1 SV=2	MULTI-MSMS		JACB153_1	MDA-MB-231 R10K8	410.26	2	406.255	810.496	54604.9	-0.14884	-0.43818	-0.58702	406.255	410.262	26.233	12.745	0.5235	26.233	26.058	26.582	0		0	0	0	0.002166	1	7712	116.54	38.794	1	63.187	1.3789	0
QLASGLLLVTGPLVLNR	17	0	1	Unmodified	_QLASGLLLVTGPLVLNR_			0	0	Q02878	Q02878	Q02878	RPL6	60S ribosomal protein L6	>sp|Q02878|RL6_HUMAN 60S ribosomal protein L6 OS=Homo sapiens GN=RPL6 PE=1 SV=3	MULTI-MSMS		JACB153_1	MDA-MB-231 R10K8	592.03	3	588.696	1763.07	46706.8	0.18546	0.041771	0.22723	589.03	592.367	74.297	28.769	0.57925	74.297	74.033	74.612	0		0	0	0	2.947e-07	2	25889	121.79	121.79	1	63.192	8.2038	0
LGLQSLR	7	0	1	Unmodified	_LGLQSLR_			0	0	P18085;C9JAK5;U3KQF2	P18085	P18085	ARF4	ADP-ribosylation factor 4	>sp|P18085|ARF4_HUMAN ADP-ribosylation factor 4 OS=Homo sapiens GN=ARF4 PE=1 SV=3;>tr|C9JAK5|C9JAK5_HUMAN ADP-ribosylation factor 4 OS=Homo sapiens GN=ARF4 PE=1 SV=1;>tr|U3KQF2|U3KQF2_HUMAN ADP-ribosylation factor 4 OS=Homo sapiens GN=ARF4 PE=1 SV=1	MULTI-MSMS		JACB153_1	MDA-MB-231 R10K8	398.75	2	393.745	785.476	55004.2	0.067288	0.1664	0.23368	393.745	398.749	32.782	14.923	0.53063	32.782	32.512	33.043	0		0	0	0	0.0068375	1	10294	110.63	6.4244	1	63.474	8.2404	0
YNEQHVPGSPFTAR	14	0	1	Unmodified	_YNEQHVPGSPFTAR_			0	0	P21333;P21333-2;Q5HY54	P21333	P21333	FLNA	Filamin-A	>sp|P21333|FLNA_HUMAN Filamin-A OS=Homo sapiens GN=FLNA PE=1 SV=4;>sp|P21333-2|FLNA_HUMAN Isoform 2 of Filamin-A OS=Homo sapiens GN=FLNA;>tr|Q5HY54|Q5HY54_HUMAN Filamin-A OS=Homo sapiens GN=FLNA PE=1 SV=1	MULTI-MSMS		JACB153_1	MDA-MB-231 R10K8	538.6	3	534.927	1601.76	48359	-0.071305	-0.15612	-0.22742	534.926	538.263	28.179	13.395	0.59926	28.179	27.899	28.498	0		0	0	0	0.0051573	1	8456	69.729	69.729	1	63.599	8.2567	0
IEEVPELPLVVEDK	14	1	0	Unmodified	_IEEVPELPLVVEDK_			0	0	P36578;H3BM89	P36578	P36578	RPL4	60S ribosomal protein L4	>sp|P36578|RL4_HUMAN 60S ribosomal protein L4 OS=Homo sapiens GN=RPL4 PE=1 SV=5;>tr|H3BM89|H3BM89_HUMAN 60S ribosomal protein L4 OS=Homo sapiens GN=RPL4 PE=1 SV=1	MULTI-MSMS		JACB153_1	MDA-MB-231 R10K8	808.95	2	804.94	1607.87	40198.4	-0.45455	-0.14848	-0.60303	805.442	808.947	61.154	24.381	0.55143	61.154	60.919	61.47	-3.8147e-06		0	0	0	0.00045749	1	21170	92.063	92.063	1	63.656	1.4485	0
VSFELFADK	9	1	0	Unmodified	_VSFELFADK_			0	0	P62937;C9J5S7;F8WE65	P62937	P62937	PPIA	Peptidyl-prolyl cis-trans isomerase A;Peptidyl-prolyl cis-trans isomerase	>sp|P62937|PPIA_HUMAN Peptidyl-prolyl cis-trans isomerase A OS=Homo sapiens GN=PPIA PE=1 SV=2;>tr|C9J5S7|C9J5S7_HUMAN Peptidyl-prolyl cis-trans isomerase OS=Homo sapiens GN=PPIA PE=1 SV=1;>tr|F8WE65|F8WE65_HUMAN Peptidyl-prolyl cis-trans isomerase OS=Homo	MULTI-MSMS		JACB153_1	MDA-MB-231 R10K8	528.27	2	528.274	1054.53	48157.8	0.28871	0.19425	0.48296	528.274	532.281	53.647	21.881	1.6204	53.647	53.334	54.954	3.8147e-06		0	0	0	0.0010399	3	18461	98.044	84.452	1	63.708	0.56277	0
EAVLLLK	7	1	0	Unmodified	_EAVLLLK_			0	0	P36578;H3BM89;H3BTP7	P36578	P36578	RPL4	60S ribosomal protein L4	>sp|P36578|RL4_HUMAN 60S ribosomal protein L4 OS=Homo sapiens GN=RPL4 PE=1 SV=5;>tr|H3BM89|H3BM89_HUMAN 60S ribosomal protein L4 OS=Homo sapiens GN=RPL4 PE=1 SV=1;>tr|H3BTP7|H3BTP7_HUMAN 60S ribosomal protein L4 (Fragment) OS=Homo sapiens GN=RPL4 PE=1 SV=1	MULTI-MSMS		JACB153_1	MDA-MB-231 R10K8	397.27	2	393.26	784.506	55816.1	-0.071279	-0.059627	-0.13091	393.26	397.267	38.889	16.962	0.67595	38.889	38.681	39.357	0		0	0	0	0.074116	1	12769	43.027	6.8412	1	63.784	1.3671	0
EAFSLFDK	8	1	0	Unmodified	_EAFSLFDK_			0	0	H0Y7A7;E7ETZ0;P62158;E7EMB3;M0QZ52;G3V479;F8WBR5;P27482	H0Y7A7	H0Y7A7	CALM2;CALM1;CALML3	Calmodulin;Calmodulin-like protein 3	>tr|H0Y7A7|H0Y7A7_HUMAN Calmodulin (Fragment) OS=Homo sapiens GN=CALM2 PE=1 SV=1;>tr|E7ETZ0|E7ETZ0_HUMAN Calmodulin OS=Homo sapiens GN=CALM1 PE=1 SV=1;>sp|P62158|CALM_HUMAN Calmodulin OS=Homo sapiens GN=CALM1 PE=1 SV=2;>tr|E7EMB3|E7EMB3_HUMAN Calmodulin OS	MULTI-MSMS		JACB153_1	MDA-MB-231 R10K8	482.75	2	478.74	955.465	50028.2	0.80879	-0.74146	0.067327	478.739	482.747	49.03	20.339	0.76228	49.03	48.773	49.535	-3.8147e-06		0	0	0	0.011607	1	16691	65.305	27.83	1	64.119	1.0068	0
IISNASCTTNCLAPLAK	17	1	0	Unmodified	_IISNASCTTNCLAPLAK_			0	0	P04406;P04406-2;E7EUT5	P04406	P04406	GAPDH	Glyceraldehyde-3-phosphate dehydrogenase	>sp|P04406|G3P_HUMAN Glyceraldehyde-3-phosphate dehydrogenase OS=Homo sapiens GN=GAPDH PE=1 SV=3;>sp|P04406-2|G3P_HUMAN Isoform 2 of Glyceraldehyde-3-phosphate dehydrogenase OS=Homo sapiens GN=GAPDH;>tr|E7EUT5|E7EUT5_HUMAN Glyceraldehyde-3-phosphate dehydr	MULTI-MSMS		JACB153_1	MDA-MB-231 R10K8	921.47	2	917.463	1832.91	36632.2	-0.93126	-0.88453	-1.8158	917.463	921.47	39.059	17.021	1.0305	39.059	38.57	39.601	0		0	0	0	9.3894e-14	1	12866	212.69	200.77	1	64.263	0.85133	0
YFILPDSLPLDTLLVDVEPK	20	1	0	Unmodified	_YFILPDSLPLDTLLVDVEPK_			0	0	P62314;J3QLI9	P62314	P62314	SNRPD1	Small nuclear ribonucleoprotein Sm D1	>sp|P62314|SMD1_HUMAN Small nuclear ribonucleoprotein Sm D1 OS=Homo sapiens GN=SNRPD1 PE=1 SV=1;>tr|J3QLI9|J3QLI9_HUMAN Small nuclear ribonucleoprotein Sm D1 OS=Homo sapiens GN=SNRPD1 PE=1 SV=1	MULTI-MSMS		JACB153_1	MDA-MB-231 R10K8	1148.64	2	1144.13	2286.24	33209.1	-0.43647	0.16957	-0.2669	1144.63	1148.64	98.244	68.555	0.76906	98.244	97.904	98.673	0		0	0	0	8.1199e-12	2	34106	150.29	150.29	1	64.268	1.887	0
YIQELWR	7	0	1	Unmodified	_YIQELWR_			0	0	P61313;E7EQV9;E7ENU7;E7EX53;P61313-2;E7ERA2	P61313	P61313	RPL15	60S ribosomal protein L15;Ribosomal protein L15	>sp|P61313|RL15_HUMAN 60S ribosomal protein L15 OS=Homo sapiens GN=RPL15 PE=1 SV=2;>tr|E7EQV9|E7EQV9_HUMAN Ribosomal protein L15 (Fragment) OS=Homo sapiens GN=RPL15 PE=1 SV=1;>tr|E7ENU7|E7ENU7_HUMAN Ribosomal protein L15 (Fragment) OS=Homo sapiens GN=RPL15	MULTI-MSMS		JACB153_1	MDA-MB-231 R10K8	509.27	2	504.269	1006.52	48758.8	0.31838	0.14686	0.46524	504.269	509.273	42.81	18.274	0.69267	42.81	42.553	43.246	3.8147e-06		0	0	0	0.0067058	1	14307	114.6	104.65	1	64.318	8.3499	0
FDLMYAK	7	1	0	Unmodified	_FDLMYAK_			0	0	Q71U36;Q71U36-2;Q13748;Q6PEY2;V9GZ17;F5H5D3;Q9BQE3;P68366;A8MUB1;P68363;CON__ENSEMBL:ENSBTAP00000016242;A6NHL2;A6NHL2-2	Q71U36;F5H5D3;P68366;P68363;A6NHL2	P68363	TUBA1A;TUBA3C;TUBA3E;TUBA1C;TUBA4A;TUBA1B;TUBAL3	Tubulin alpha-1A chain;Tubulin alpha-3C/D chain;Tubulin alpha-3E chain;Tubulin alpha-1C chain;Tubulin alpha-4A chain;Tubulin alpha-1B chain;Tubulin alpha chain-like 3	>sp|Q71U36|TBA1A_HUMAN Tubulin alpha-1A chain OS=Homo sapiens GN=TUBA1A PE=1 SV=1;>sp|Q71U36-2|TBA1A_HUMAN Isoform 2 of Tubulin alpha-1A chain OS=Homo sapiens GN=TUBA1A;>sp|Q13748|TBA3C_HUMAN Tubulin alpha-3C/D chain OS=Homo sapiens GN=TUBA3C PE=1 SV=3;>sp	MULTI-MSMS		JACB153_1	MDA-MB-231 R10K8	448.23	2	444.22	886.426	50981.6	-0.038043	-0.78728	-0.82532	444.221	448.227	42.357	18.115	0.69727	42.357	42.083	42.78	0		0	0	0	0.012397	2	14107	81.297	51.112	1	64.373	0.71847	0
VHAELADVLTEAVVDSILAIK	21	1	0	Unmodified	_VHAELADVLTEAVVDSILAIK_			0	0	P40227;B4DPJ8;P40227-2	P40227	P40227	CCT6A	T-complex protein 1 subunit zeta	>sp|P40227|TCPZ_HUMAN T-complex protein 1 subunit zeta OS=Homo sapiens GN=CCT6A PE=1 SV=3;>tr|B4DPJ8|B4DPJ8_HUMAN T-complex protein 1 subunit zeta OS=Homo sapiens GN=CCT6A PE=1 SV=1;>sp|P40227-2|TCPZ_HUMAN Isoform 2 of T-complex protein 1 subunit zeta OS=H	MULTI-MSMS		JACB153_1	MDA-MB-231 R10K8	739.09	3	736.082	2205.23	40662.3	-0.19711	-0.041165	-0.23827	736.082	739.088	97.765	65.484	1.154	97.765	97.356	98.51	0		0	0	0	2.0466e-18	1	33938	178.06	178.06	1	64.466	1.9354	0
STVHEILCK	9	1	0	Acetyl (Protein N-term)	_(ac)STVHEILCK_			1	0	P07355-2;P07355;H0YN42;A6NMY6;H0YMU9;H0YMD0;H0YKS4;H0YNP5;H0YMM1;H0YMW4;H0YKX9;H0YMT9;H0YLV6;H0YKZ7;H0YKL9;H0YKV8;H0YMD9;H0YKN4;H0YNB8	P07355-2	P07355-2	ANXA2;ANXA2P2	Annexin A2;Annexin;Putative annexin A2-like protein	>sp|P07355-2|ANXA2_HUMAN Isoform 2 of Annexin A2 OS=Homo sapiens GN=ANXA2;>sp|P07355|ANXA2_HUMAN Annexin A2 OS=Homo sapiens GN=ANXA2 PE=1 SV=2;>tr|H0YN42|H0YN42_HUMAN Annexin (Fragment) OS=Homo sapiens GN=ANXA2 PE=1 SV=1;>sp|A6NMY6|AXA2L_HUMAN Putative ann	MULTI-MSMS		JACB153_1	MDA-MB-231 R10K8	568.8	2	564.79	1127.56	45538.1	-0.36487	0.20362	-0.16125	564.791	568.797	34.224	15.407	0.89798	34.224	33.842	34.74	0		0	0	0	1.1194e-05	3	10879	163.94	117.94	1	64.474	0.57774	0
AVAGDASESALLK	13	1	0	Unmodified	_AVAGDASESALLK_			0	0	P05023;P05023-4;P05023-3;P05023-2	P05023	P05023	ATP1A1	Sodium/potassium-transporting ATPase subunit alpha-1	>sp|P05023|AT1A1_HUMAN Sodium/potassium-transporting ATPase subunit alpha-1 OS=Homo sapiens GN=ATP1A1 PE=1 SV=1;>sp|P05023-4|AT1A1_HUMAN Isoform 4 of Sodium/potassium-transporting ATPase subunit alpha-1 OS=Homo sapiens GN=ATP1A1;>sp|P05023-3|AT1A1_HUMAN Is	MULTI-MSMS		JACB153_1	MDA-MB-231 R10K8	620.34	2	616.33	1230.65	44813	-0.26087	0.6174	0.35652	616.331	620.337	31.66	14.557	0.42401	31.66	31.448	31.872	-1.9073e-06		0	0	0	0.00013154	1	9859	111.12	90.696	1	64.936	1.8939	0
GLAPDLPEDLYHLIK	15	1	0	Unmodified	_GLAPDLPEDLYHLIK_			0	0	P62277;J3KMX5	P62277	P62277	RPS13	40S ribosomal protein S13	>sp|P62277|RS13_HUMAN 40S ribosomal protein S13 OS=Homo sapiens GN=RPS13 PE=1 SV=2;>tr|J3KMX5|J3KMX5_HUMAN 40S ribosomal protein S13 OS=Homo sapiens GN=RPS13 PE=1 SV=1	MULTI-MSMS		JACB153_1	MDA-MB-231 R10K8	567.98	3	565.31	1692.91	46614.2	0.32814	-0.046103	0.28203	565.31	567.982	66.163	26.055	0.88237	66.163	65.808	66.69	-7.6294e-06		0	0	0	1.0509e-05	2	23065	113.25	113.25	1	64.98	1.1748	0
VGSAADIPINISETDLSLLTATVVPPSGR	29	0	1	Unmodified	_VGSAADIPINISETDLSLLTATVVPPSGR_			0	0	P21333;P21333-2;Q5HY54;E9PHF0;H0Y5F3;H7C2E7	P21333	P21333	FLNA	Filamin-A	>sp|P21333|FLNA_HUMAN Filamin-A OS=Homo sapiens GN=FLNA PE=1 SV=4;>sp|P21333-2|FLNA_HUMAN Isoform 2 of Filamin-A OS=Homo sapiens GN=FLNA;>tr|Q5HY54|Q5HY54_HUMAN Filamin-A OS=Homo sapiens GN=FLNA PE=1 SV=1;>tr|E9PHF0|E9PHF0_HUMAN Filamin-A OS=Homo sapiens G	MULTI-MSMS		JACB153_1	MDA-MB-231 R10K8	968.86	3	965.189	2892.54	35674.9	-0.56486	0.0083464	-0.55651	965.857	968.859	87.156	33.055	0.99473	87.156	86.785	87.779	0		0	0	0	8.1441e-08	2	30474	120.61	120.61	1	65.019	8.4409	0
GAVDGGLSIPHSTK	14	1	0	Unmodified	_GAVDGGLSIPHSTK_			0	0	P46777;Q5T7N0	P46777	P46777	RPL5	60S ribosomal protein L5	>sp|P46777|RL5_HUMAN 60S ribosomal protein L5 OS=Homo sapiens GN=RPL5 PE=1 SV=3;>tr|Q5T7N0|Q5T7N0_HUMAN 60S ribosomal protein L5 (Fragment) OS=Homo sapiens GN=RPL5 PE=1 SV=2	MULTI-MSMS		JACB153_1	MDA-MB-231 R10K8	449.58	3	446.905	1337.69	52286.8	0.05206	0.030367	0.082426	447.239	449.577	26.895	12.965	0.7952	26.895	26.466	27.261	0		0	0	0	8.716e-05	1	7954	93.823	84.773	1	65.125	1.289	0
MELITILEK	9	1	0	Acetyl (Protein N-term)	_(ac)MELITILEK_			1	0	Q14974;J3QR48	Q14974	Q14974	KPNB1	Importin subunit beta-1	>sp|Q14974|IMB1_HUMAN Importin subunit beta-1 OS=Homo sapiens GN=KPNB1 PE=1 SV=2;>tr|J3QR48|J3QR48_HUMAN Importin subunit beta-1 (Fragment) OS=Homo sapiens GN=KPNB1 PE=1 SV=2	MULTI-MSMS		JACB153_1	MDA-MB-231 R10K8	570.33	2	566.32	1130.63	46717.2	0.26985	-0.33497	-0.065126	566.32	570.327	97.185	61.747	0.67687	97.185	96.892	97.569	7.6294e-06		0	0	0	0.0022534	3	33812	86.898	86.898	1	65.151	1.9129	0
EGLELLK	7	1	0	Unmodified	_EGLELLK_			0	0	P06733;P06733-2	P06733	P06733	ENO1	Alpha-enolase	>sp|P06733|ENOA_HUMAN Alpha-enolase OS=Homo sapiens GN=ENO1 PE=1 SV=2;>sp|P06733-2|ENOA_HUMAN Isoform MBP-1 of Alpha-enolase OS=Homo sapiens GN=ENO1	MULTI-MSMS		JACB153_1	MDA-MB-231 R10K8	401.24	2	401.239	800.464	53862.3	-0.088266	0.41398	0.32571	401.24	405.247	40.043	17.347	0.70642	40.043	39.75	40.456	-3.8147e-06		0	0	0	0.014085	3	13258	77.058	16.699	1	65.161	0.68101	0
EANNFLWPFK	10	1	0	Unmodified	_EANNFLWPFK_			0	0	P18124;A8MUD9	P18124	P18124	RPL7	60S ribosomal protein L7	>sp|P18124|RL7_HUMAN 60S ribosomal protein L7 OS=Homo sapiens GN=RPL7 PE=1 SV=1;>tr|A8MUD9|A8MUD9_HUMAN 60S ribosomal protein L7 OS=Homo sapiens GN=RPL7 PE=1 SV=1	MULTI-MSMS		JACB153_1	MDA-MB-231 R10K8	637.33	2	633.319	1264.62	43750.5	-0.2406	0.37897	0.13837	633.822	637.327	66.824	26.279	0.63403	66.824	66.501	67.135	0		0	0	0	0.0033609	2	23329	86.624	86.624	1	65.388	1.5994	0
VVLAYEPVWAIGTGK	15	1	0	Unmodified	_VVLAYEPVWAIGTGK_			0	0	P60174;P60174-1;P60174-4;U3KPZ0;U3KQF3	P60174	P60174	TPI1	Triosephosphate isomerase	>sp|P60174|TPIS_HUMAN Triosephosphate isomerase OS=Homo sapiens GN=TPI1 PE=1 SV=3;>sp|P60174-1|TPIS_HUMAN Isoform 2 of Triosephosphate isomerase OS=Homo sapiens GN=TPI1;>sp|P60174-4|TPIS_HUMAN Isoform 4 of Triosephosphate isomerase OS=Homo sapiens GN=TPI1;	MULTI-MSMS		JACB153_1	MDA-MB-231 R10K8	537.64	3	534.968	1601.88	48245.8	0.59531	-0.078662	0.51665	534.968	537.639	63.523	25.17	0.61973	63.523	63.301	63.921	0		0	0	0	2.9035e-07	1	22045	128.96	124.11	1	65.509	1.4203	0
VGINYQPPTVVPGGDLAK	18	1	0	Unmodified	_VGINYQPPTVVPGGDLAK_			0	0	Q71U36;Q71U36-2;Q13748;Q6PEY2;Q13748-2;V9GZ17;F5H5D3;Q9BQE3;P68366;A8MUB1;P68363;CON__ENSEMBL:ENSBTAP00000016242	Q71U36;F5H5D3;P68366;P68363	P68363	TUBA1A;TUBA3C;TUBA3E;TUBA1C;TUBA4A;TUBA1B	Tubulin alpha-1A chain;Tubulin alpha-3C/D chain;Tubulin alpha-3E chain;Tubulin alpha-1C chain;Tubulin alpha-4A chain;Tubulin alpha-1B chain	>sp|Q71U36|TBA1A_HUMAN Tubulin alpha-1A chain OS=Homo sapiens GN=TUBA1A PE=1 SV=1;>sp|Q71U36-2|TBA1A_HUMAN Isoform 2 of Tubulin alpha-1A chain OS=Homo sapiens GN=TUBA1A;>sp|Q13748|TBA3C_HUMAN Tubulin alpha-3C/D chain OS=Homo sapiens GN=TUBA3C PE=1 SV=3;>sp	MULTI-MSMS		JACB153_1	MDA-MB-231 R10K8	917	2	912.996	1823.98	37021.3	-0.81608	-0.069853	-0.88593	912.996	917.003	51.226	21.078	0.92122	51.226	50.713	51.634	0		0	0	0	3.8115e-07	3	17583	107.98	107.98	1	65.687	0.65026	0
GALQYLVPILTQTLTK	16	1	0	Unmodified	_GALQYLVPILTQTLTK_			0	0	Q14974;Q14974-2	Q14974	Q14974	KPNB1	Importin subunit beta-1	>sp|Q14974|IMB1_HUMAN Importin subunit beta-1 OS=Homo sapiens GN=KPNB1 PE=1 SV=2;>sp|Q14974-2|IMB1_HUMAN Isoform 2 of Importin subunit beta-1 OS=Homo sapiens GN=KPNB1	MULTI-MSMS		JACB153_1	MDA-MB-231 R10K8	589.69	3	587.017	1758.03	45781.6	0.14896	0.16879	0.31776	587.351	590.023	83.058	31.685	0.78867	83.058	82.718	83.507	0		0	0	0	5.4661e-08	2	29063	147.12	145.05	1	65.704	1.6143	0
DLTTAGAVTQCYR	13	0	1	Unmodified	_DLTTAGAVTQCYR_			0	0	Q02543;M0R117;M0R1A7;M0R3D6;M0R0P7	Q02543	Q02543	RPL18A	60S ribosomal protein L18a	>sp|Q02543|RL18A_HUMAN 60S ribosomal protein L18a OS=Homo sapiens GN=RPL18A PE=1 SV=2;>tr|M0R117|M0R117_HUMAN 60S ribosomal protein L18a OS=Homo sapiens GN=RPL18A PE=1 SV=1;>tr|M0R1A7|M0R1A7_HUMAN 60S ribosomal protein L18a OS=Homo sapiens GN=RPL18A PE=1 S	MULTI-MSMS		JACB153_1	MDA-MB-231 R10K8	733.35	2	728.348	1454.68	40173.8	-0.59089	-0.16211	-0.753	728.853	733.353	36.321	16.107	0.50482	36.321	36.13	36.635	0		0	0	0	9.058e-10	1	11759	192.15	183.14	1	65.726	8.5328	0
FSGWYDADLSPAGHEEAK	18	1	0	Unmodified	_FSGWYDADLSPAGHEEAK_			0	0	P18669	P18669	P18669	PGAM1	Phosphoglycerate mutase 1	>sp|P18669|PGAM1_HUMAN Phosphoglycerate mutase 1 OS=Homo sapiens GN=PGAM1 PE=1 SV=2	MULTI-MSMS		JACB153_1	MDA-MB-231 R10K8	663.64	3	660.631	1978.87	42726.9	-0.27495	-0.2764	-0.55136	660.964	663.636	43.363	18.453	0.61517	43.363	43.083	43.699	0		0	0	0	0.00062612	1	14534	83.792	79.606	1	65.84	0.93293	0
ASIHEAWTDGK	11	1	0	Unmodified	_ASIHEAWTDGK_			0	0	O43707;O43707-2;P12814;P12814-3;P12814-4;P12814-2;H9KV75	O43707;P12814	O43707	ACTN4;ACTN1	Alpha-actinin-4;Alpha-actinin-1	>sp|O43707|ACTN4_HUMAN Alpha-actinin-4 OS=Homo sapiens GN=ACTN4 PE=1 SV=2;>sp|O43707-2|ACTN4_HUMAN Isoform ACTN4ISO of Alpha-actinin-4 OS=Homo sapiens GN=ACTN4;>sp|P12814|ACTN1_HUMAN Alpha-actinin-1 OS=Homo sapiens GN=ACTN1 PE=1 SV=2;>sp|P12814-3|ACTN1_HUM	MULTI-MSMS		JACB153_1	MDA-MB-231 R10K8	408.2	3	405.532	1213.57	53722.9	-0.093844	0.69542	0.60157	405.531	408.203	21.339	11.117	0.65564	21.339	20.936	21.592	-1.9073e-06		0	0	0	0.00054082	1	5763	117.23	112.93	1	66.009	1.5561	0
YPIEHGIITNWDDMEK	16	1	0	Unmodified	_YPIEHGIITNWDDMEK_			0	0	P68032;P68133;P62736;P63267;A6NL76;Q5T8M8;F6QUT6;F6UVQ4;C9JFL5;B8ZZJ2;F8WB63	P68032	P68032	ACTC1;ACTA1;ACTA2;ACTG2	Actin, alpha cardiac muscle 1;Actin, alpha skeletal muscle;Actin, aortic smooth muscle;Actin, gamma-enteric smooth muscle	>sp|P68032|ACTC_HUMAN Actin, alpha cardiac muscle 1 OS=Homo sapiens GN=ACTC1 PE=1 SV=1;>sp|P68133|ACTS_HUMAN Actin, alpha skeletal muscle OS=Homo sapiens GN=ACTA1 PE=1 SV=1;>sp|P62736|ACTA_HUMAN Actin, aortic smooth muscle OS=Homo sapiens GN=ACTA2 PE=1 SV=	MULTI-MSMS		JACB153_1	MDA-MB-231 R10K8	656.98	3	654.308	1959.9	43393.2	-0.32853	-0.46869	-0.79722	654.643	656.98	46.915	19.64	1.9897	46.915	46.497	48.487	0		0	0	0	1.4559e-07	4	15985	129.93	129.93	1	66.262	0.48243	0
IMNTFSVVPSPK	12	1	0	Unmodified	_IMNTFSVVPSPK_			0	0	Q13509;Q13509-2;G3V2A3;P07437;Q5JP53;Q5ST81;P68371;M0R2D3;P04350;M0QYM7;M0R042	Q13509;P07437;P68371;P04350	P68371	TUBB3;TUBB;TUBB4B;TUBB4A	Tubulin beta-3 chain;Tubulin beta chain;Tubulin beta-4B chain;Tubulin beta-4A chain	>sp|Q13509|TBB3_HUMAN Tubulin beta-3 chain OS=Homo sapiens GN=TUBB3 PE=1 SV=2;>sp|Q13509-2|TBB3_HUMAN Isoform 2 of Tubulin beta-3 chain OS=Homo sapiens GN=TUBB3;>tr|G3V2A3|G3V2A3_HUMAN Tubulin beta-3 chain (Fragment) OS=Homo sapiens GN=TUBB3 PE=1 SV=1;>sp|	MULTI-MSMS		JACB153_1	MDA-MB-231 R10K8	664.36	2	660.355	1318.7	42257.4	-0.29202	-0.21679	-0.50881	660.356	664.362	46.084	19.364	1.1767	46.084	45.557	46.734	0		0	0	0	8.331e-05	2	15537	134.99	106.66	1	66.477	0.75464	0
AAFDDAIAELDTLSEESYK	19	1	0	Unmodified	_AAFDDAIAELDTLSEESYK_			0	0	P62258;P62258-2;K7EM20	P62258	P62258	YWHAE	14-3-3 protein epsilon	>sp|P62258|1433E_HUMAN 14-3-3 protein epsilon OS=Homo sapiens GN=YWHAE PE=1 SV=1;>sp|P62258-2|1433E_HUMAN Isoform SV of 14-3-3 protein epsilon OS=Homo sapiens GN=YWHAE;>tr|K7EM20|K7EM20_HUMAN 14-3-3 protein epsilon (Fragment) OS=Homo sapiens GN=YWHAE PE=1	MULTI-MSMS		JACB153_1	MDA-MB-231 R10K8	1048.99	2	1044.49	2086.96	34427.2	-0.54069	0.0348	-0.50589	1044.99	1049	78.039	30.014	0.84768	78.039	77.667	78.514	0		0	0	0	2.7729e-16	2	27287	200.67	200.67	1	66.555	1.1578	0
LAVNMVPFPR	10	0	1	Unmodified	_LAVNMVPFPR_			0	0	Q13509;Q13509-2;P07437;Q5JP53;Q5ST81;A6NNZ2;I3L2F9;P68371;Q3ZCM7;Q5SQY0;F5H0I4;Q13885;P04350;Q9BUF5;K7ESM5;Q9BVA1	Q13509;P07437;P68371;Q3ZCM7;Q13885;P04350;Q9BUF5;Q9BVA1	P68371	TUBB3;TUBB;TUBB4B;TUBB8;RP11-631M21.2;TUBB2A;TUBB4A;TUBB6;TUBB2B	Tubulin beta-3 chain;Tubulin beta chain;Tubulin beta-8 chain B;Tubulin beta-4B chain;Tubulin beta-8 chain;Tubulin beta-2A chain;Tubulin beta-4A chain;Tubulin beta-6 chain;Tubulin beta-2B chain	>sp|Q13509|TBB3_HUMAN Tubulin beta-3 chain OS=Homo sapiens GN=TUBB3 PE=1 SV=2;>sp|Q13509-2|TBB3_HUMAN Isoform 2 of Tubulin beta-3 chain OS=Homo sapiens GN=TUBB3;>sp|P07437|TBB5_HUMAN Tubulin beta chain OS=Homo sapiens GN=TUBB PE=1 SV=2;>tr|Q5JP53|Q5JP53_HU	MULTI-MSMS		JACB153_1	MDA-MB-231 R10K8	577.32	2	572.321	1142.63	45477.2	0.20669	-0.23752	-0.030829	572.321	577.325	53.116	21.706	0.70158	53.116	52.869	53.57	0		0	0	0	0.0010761	2	18240	106.18	106.18	1	66.659	8.6538	0
YVASYLLAALGGNSSPSAK	19	1	0	Unmodified	_YVASYLLAALGGNSSPSAK_			0	0	P05387	P05387	P05387	RPLP2	60S acidic ribosomal protein P2	>sp|P05387|RLA2_HUMAN 60S acidic ribosomal protein P2 OS=Homo sapiens GN=RPLP2 PE=1 SV=1	MULTI-MSMS		JACB153_1	MDA-MB-231 R10K8	626.33	3	623.663	1867.97	43503.1	-0.024128	-0.8656	-0.88973	623.997	626.335	64.527	25.506	0.95529	64.527	63.9	64.856	0		0	0	0	2.9513e-07	1	22401	109.87	109.87	1	66.867	1.382	0
ALTVPELTQQVFDAK	15	1	0	Unmodified	_ALTVPELTQQVFDAK_			0	0	P07437;Q5JP53;Q5ST81	P07437	P07437	TUBB	Tubulin beta chain	>sp|P07437|TBB5_HUMAN Tubulin beta chain OS=Homo sapiens GN=TUBB PE=1 SV=2;>tr|Q5JP53|Q5JP53_HUMAN Tubulin beta chain OS=Homo sapiens GN=TUBB PE=1 SV=1;>tr|Q5ST81|Q5ST81_HUMAN Tubulin beta chain OS=Homo sapiens GN=TUBB PE=1 SV=1	MULTI-MSMS		JACB153_1	MDA-MB-231 R10K8	556.64	3	553.97	1658.89	47220.2	0.28874	-0.047238	0.2415	554.304	556.641	62.63	24.88	1.1709	62.63	61.981	63.152	0		0	0	0	3.7263e-09	3	21773	175.21	175.21	1	66.909	1.0175	0
MFVLDEADEMLSR	13	0	1	Unmodified	_MFVLDEADEMLSR_			0	0	P60842;P60842-2;J3KT12;J3QS69;J3KTB5;J3QL43;J3QR64;J3KSZ0;J3QLN6;J3KTN0;Q14240-2;Q14240;E7EQG2;Q9NZE6	P60842;Q14240-2	P60842	EIF4A1;EIF4A2	Eukaryotic initiation factor 4A-I;Eukaryotic initiation factor 4A-II	>sp|P60842|IF4A1_HUMAN Eukaryotic initiation factor 4A-I OS=Homo sapiens GN=EIF4A1 PE=1 SV=1;>sp|P60842-2|IF4A1_HUMAN Isoform 2 of Eukaryotic initiation factor 4A-I OS=Homo sapiens GN=EIF4A1;>tr|J3KT12|J3KT12_HUMAN Eukaryotic initiation factor 4A-I OS=Homo	MULTI-MSMS		JACB153_1	MDA-MB-231 R10K8	783.36	2	778.36	1554.71	39128.6	-0.55162	-0.39039	-0.94201	778.361	783.365	67.578	26.526	0.76207	67.578	67.306	68.068	0		0	0	0	1.6847e-06	2	23482	160.38	152.4	1	67.069	8.7071	0
LMIEMDGTENK	11	1	0	Unmodified	_LMIEMDGTENK_			0	0	P06733;K7EM90	P06733	P06733	ENO1	Alpha-enolase	>sp|P06733|ENOA_HUMAN Alpha-enolase OS=Homo sapiens GN=ENO1 PE=1 SV=2;>tr|K7EM90|K7EM90_HUMAN Enolase (Fragment) OS=Homo sapiens GN=ENO1 PE=1 SV=1	MULTI-MSMS		JACB153_1	MDA-MB-231 R10K8	644.8	2	640.797	1279.58	42507.2	-0.26401	-0.92586	-1.1899	640.796	644.804	37.621	16.537	0.91714	37.621	37.391	38.308	0		0	0	0	0.00010495	3	12246	150.04	146.72	1	67.098	0.83002	0
EVDEQMLNVQNK	12	1	0	Unmodified	_EVDEQMLNVQNK_			0	0	P07437;Q5JP53;Q5ST81;E9PBJ4;P68371;Q13885;Q9BVA1	P07437;P68371;Q13885;Q9BVA1	P68371	TUBB;TUBB4B;TUBB2A;TUBB2B	Tubulin beta chain;Tubulin beta-4B chain;Tubulin beta-2A chain;Tubulin beta-2B chain	>sp|P07437|TBB5_HUMAN Tubulin beta chain OS=Homo sapiens GN=TUBB PE=1 SV=2;>tr|Q5JP53|Q5JP53_HUMAN Tubulin beta chain OS=Homo sapiens GN=TUBB PE=1 SV=1;>tr|Q5ST81|Q5ST81_HUMAN Tubulin beta chain OS=Homo sapiens GN=TUBB PE=1 SV=1;>tr|E9PBJ4|E9PBJ4_HUMAN Tub	MULTI-MSMS		JACB153_1	MDA-MB-231 R10K8	727.85	2	723.848	1445.68	40713.1	-0.19018	-0.7994	-0.98958	723.848	727.855	33.056	15.019	0.75003	33.056	32.698	33.448	0		0	0	0	1.2644e-14	1	10393	231.05	231.05	1	67.217	0.7579	0
IEDFLER	7	0	1	Unmodified	_IEDFLER_			0	0	P46781;C9JM19;B5MCT8	P46781	P46781	RPS9	40S ribosomal protein S9	>sp|P46781|RS9_HUMAN 40S ribosomal protein S9 OS=Homo sapiens GN=RPS9 PE=1 SV=3;>tr|C9JM19|C9JM19_HUMAN 40S ribosomal protein S9 OS=Homo sapiens GN=RPS9 PE=1 SV=1;>tr|B5MCT8|B5MCT8_HUMAN 40S ribosomal protein S9 OS=Homo sapiens GN=RPS9 PE=1 SV=1	MULTI-MSMS		JACB153_1	MDA-MB-231 R10K8	466.24	2	461.237	920.46	49770.5	0.16028	-0.20737	-0.047096	461.237	466.241	38.622	16.87	0.56584	38.622	38.391	38.957	0		0	0	0	0.0071243	1	12668	101.99	39.274	1	67.378	8.7472	0
QLIVGVNK	8	1	0	Unmodified	_QLIVGVNK_			0	0	Q05639;P68104;Q5VTE0	Q05639;P68104	P68104	EEF1A2;EEF1A1;EEF1A1P5	Elongation factor 1-alpha 2;Elongation factor 1-alpha 1;Putative elongation factor 1-alpha-like 3	>sp|Q05639|EF1A2_HUMAN Elongation factor 1-alpha 2 OS=Homo sapiens GN=EEF1A2 PE=1 SV=1;>sp|P68104|EF1A1_HUMAN Elongation factor 1-alpha 1 OS=Homo sapiens GN=EEF1A1 PE=1 SV=1;>sp|Q5VTE0|EF1A3_HUMAN Putative elongation factor 1-alpha-like 3 OS=Homo sapiens G	MULTI-MSMS		JACB153_1	MDA-MB-231 R10K8	439.78	2	435.774	869.533	52510.9	-0.56309	-0.12434	-0.68743	435.775	439.781	27.664	13.222	0.94658	27.664	27.438	28.385	-1.9073e-06		0	0	0	0.0017335	2	8249	129.68	48.301	1	67.552	0.69907	0
AGLNSLEAVK	10	1	0	Acetyl (Protein N-term)	_(ac)AGLNSLEAVK_			1	0	P67936	P67936	P67936	TPM4	Tropomyosin alpha-4 chain	>sp|P67936|TPM4_HUMAN Tropomyosin alpha-4 chain OS=Homo sapiens GN=TPM4 PE=1 SV=3	MULTI-MSMS		JACB153_1	MDA-MB-231 R10K8	526.3	2	522.29	1042.57	47516.1	0.40379	-0.17691	0.22687	522.29	526.297	51.83	21.275	0.48996	51.83	51.575	52.065	-3.8147e-06		0	0	0	0.00071537	1	17754	112.83	98.898	1	67.588	1.0948	0
IGAEVYHNLK	10	1	0	Unmodified	_IGAEVYHNLK_			0	0	P06733;P06733-2;K7EM90	P06733	P06733	ENO1	Alpha-enolase	>sp|P06733|ENOA_HUMAN Alpha-enolase OS=Homo sapiens GN=ENO1 PE=1 SV=2;>sp|P06733-2|ENOA_HUMAN Isoform MBP-1 of Alpha-enolase OS=Homo sapiens GN=ENO1;>tr|K7EM90|K7EM90_HUMAN Enolase (Fragment) OS=Homo sapiens GN=ENO1 PE=1 SV=1	MULTI-MSMS		JACB153_1	MDA-MB-231 R10K8	384.55	3	381.877	1142.61	55518.3	-0.23678	-0.23495	-0.47173	381.877	384.548	22.814	11.606	0.95377	22.814	22.614	23.568	0		0	0	0	0.0081173	3	6317	70.399	41.672	1	67.59	0.66875	0
ALELTGLK	8	1	0	Unmodified	_ALELTGLK_			0	0	P19338	P19338	P19338	NCL	Nucleolin	>sp|P19338|NUCL_HUMAN Nucleolin OS=Homo sapiens GN=NCL PE=1 SV=3	MULTI-MSMS		JACB153_1	MDA-MB-231 R10K8	426.77	2	422.761	843.507	53112.1	0.19687	2.6677	2.8646	422.76	426.768	37.477	16.497	0.62706	37.477	37.161	37.788	0		0	0	0	0.0087828	1	12234	74.301	21.585	1	67.665	1.0298	0
LLETAGIK	8	1	0	Unmodified	_LLETAGIK_			0	0	Q02388;Q02388-2	Q02388	Q02388	COL7A1	Collagen alpha-1(VII) chain	>sp|Q02388|CO7A1_HUMAN Collagen alpha-1(VII) chain OS=Homo sapiens GN=COL7A1 PE=1 SV=2;>sp|Q02388-2|CO7A1_HUMAN Isoform 2 of Collagen alpha-1(VII) chain OS=Homo sapiens GN=COL7A1	MULTI-MSMS		JACB153_1	MDA-MB-231 R10K8	427.27	2	422.761	843.507	53112.1	0.19687	2.6677	2.8646	422.76	426.768	37.477	16.497	0.62706	37.477	37.161	37.788	0		0	0	0	0.14591	1	12173	29.162	3.2224	1	67.665	1.0298	0
LLQDSVDFSLADAINTEFK	19	1	0	Unmodified	_LLQDSVDFSLADAINTEFK_			0	0	P08670;B0YJC4	P08670	P08670	VIM	Vimentin	>sp|P08670|VIME_HUMAN Vimentin OS=Homo sapiens GN=VIM PE=1 SV=4;>tr|B0YJC4|B0YJC4_HUMAN Vimentin OS=Homo sapiens GN=VIM PE=1 SV=1	MULTI-MSMS		JACB153_1	MDA-MB-231 R10K8	1068.04	2	1063.54	2125.06	34145.5	-0.49118	0.27114	-0.22004	1063.54	1068.04	77.422	29.806	3.7451	77.422	76.801	80.546	0		0	0	0	7.1407e-17	7	27111	214.46	214.46	1	67.698	1.119	0
LNFSHGTHEYHAETIK	16	1	0	Unmodified	_LNFSHGTHEYHAETIK_			0	0	P14618;H3BQ34;H3BTJ2;H3BUW1;H3BT25;P14618-2;H3BTN5	P14618;P14618-2	P14618	PKM2	Pyruvate kinase isozymes M1/M2;Pyruvate kinase	>sp|P14618|KPYM_HUMAN Pyruvate kinase PKM OS=Homo sapiens GN=PKM PE=1 SV=4;>tr|H3BQ34|H3BQ34_HUMAN Pyruvate kinase OS=Homo sapiens GN=PKM PE=1 SV=1;>tr|H3BTJ2|H3BTJ2_HUMAN Pyruvate kinase PKM (Fragment) OS=Homo sapiens GN=PKM PE=1 SV=1;>tr|H3BUW1|H3BUW1_HU	MULTI-MSMS		JACB153_1	MDA-MB-231 R10K8	473.99	4	471.731	1882.9	51050.3	0.33755	-0.25145	0.086103	471.982	473.985	19.462	10.49	0.71948	19.462	19.229	19.949	0		0	0	0	1.2385e-05	1	5051	98.281	98.281	1	67.848	1.4471	0
ACPLDQAIGLLVAIFHK	17	1	0	Acetyl (Protein N-term)	_(ac)ACPLDQAIGLLVAIFHK_			1	0	P06703;R4GN98	P06703	P06703	S100A6	Protein S100-A6	>sp|P06703|S10A6_HUMAN Protein S100-A6 OS=Homo sapiens GN=S100A6 PE=1 SV=1;>tr|R4GN98|R4GN98_HUMAN Protein S100-A6 (Fragment) OS=Homo sapiens GN=S100A6 PE=1 SV=1	MULTI-MSMS		JACB153_1	MDA-MB-231 R10K8	959.03	2	954.524	1907.03	35638.9	-0.66834	-0.62732	-1.2957	955.025	959.032	102.63	96.677	0.54739	102.63	102.53	103.08	0		0	0	0	1.8369e-10	1	35445	174.95	174.95	1	67.941	0.77324	0
DICNDVLSLLEK	12	1	0	Unmodified	_DICNDVLSLLEK_			0	0	P63104;E7EX29;B0AZS6;E7ESK7	P63104	P63104	YWHAZ	14-3-3 protein zeta/delta	>sp|P63104|1433Z_HUMAN 14-3-3 protein zeta/delta OS=Homo sapiens GN=YWHAZ PE=1 SV=1;>tr|E7EX29|E7EX29_HUMAN 14-3-3 protein zeta/delta (Fragment) OS=Homo sapiens GN=YWHAZ PE=1 SV=1;>tr|B0AZS6|B0AZS6_HUMAN 14-3-3 protein zeta/delta OS=Homo sapiens GN=YWHAZ P	MULTI-MSMS		JACB153_1	MDA-MB-231 R10K8	713.87	2	709.863	1417.71	41114.5	-0.079077	-0.60736	-0.68643	709.864	713.871	79.613	30.537	1.8657	79.613	79.21	81.076	0		0	0	0	6.5183e-05	3	27853	139.89	139.89	1	68.3	0.8461	0
DLADELALVDVIEDK	15	1	0	Unmodified	_DLADELALVDVIEDK_			0	0	P00338-3;P00338;P00338-4;P00338-2;P00338-5;F5GXY2;F5GYU2;F5GXH2;F5H6W8;F5H5J4;F5GZQ4	P00338-3	P00338-3	LDHA	L-lactate dehydrogenase A chain	>sp|P00338-3|LDHA_HUMAN Isoform 3 of L-lactate dehydrogenase A chain OS=Homo sapiens GN=LDHA;>sp|P00338|LDHA_HUMAN L-lactate dehydrogenase A chain OS=Homo sapiens GN=LDHA PE=1 SV=2;>sp|P00338-4|LDHA_HUMAN Isoform 4 of L-lactate dehydrogenase A chain OS=Hom	MULTI-MSMS		JACB153_1	MDA-MB-231 R10K8	833.44	2	829.43	1656.85	38543.3	-0.36366	-0.36528	-0.72894	829.932	833.437	84.537	32.179	1.5937	84.537	84.148	85.742	0		0	0	0	4.0325e-09	6	29564	174.17	174.17	1	68.323	0.76333	0
TLVSVTK	7	1	0	Unmodified	_TLVSVTK_			0	0	P07900-2;P07900;Q86U12;Q58FG1	P07900-2;Q58FG1	P07900-2	HSP90AA1;HSP90AA4P	Heat shock protein HSP 90-alpha;Putative heat shock protein HSP 90-alpha A4	>sp|P07900-2|HS90A_HUMAN Isoform 2 of Heat shock protein HSP 90-alpha OS=Homo sapiens GN=HSP90AA1;>sp|P07900|HS90A_HUMAN Heat shock protein HSP 90-alpha OS=Homo sapiens GN=HSP90AA1 PE=1 SV=5;>tr|Q86U12|Q86U12_HUMAN Full-length cDNA clone CS0CAP007YF18 of T	MULTI-MSMS		JACB153_1	MDA-MB-231 R10K8	378.24	2	374.234	746.454	56574.9	-0.15133	0.21989	0.068562	374.234	378.241	21.047	11.013	0.54575	21.047	20.88	21.425	0		0	0	0	0.010145	1	5647	86.953	53.157	1	68.404	2.3177	0
CPEALFQPSFLGMESCGIHETTFNSIMK	28	1	0	Unmodified	_CPEALFQPSFLGMESCGIHETTFNSIMK_			0	0	CON__P60712;P60709;P63261	CON__P60712;P63261	CON__P60712	ACTB;ACTG1	Actin, cytoplasmic 1;Actin, cytoplasmic 1, N-terminally processed;Actin, cytoplasmic 2;Actin, cytoplasmic 2, N-terminally processed	>P60712 SWISS-PROT:P60712 (Bos taurus) Actin, cytoplasmic 1;>sp|P60709|ACTB_HUMAN Actin, cytoplasmic 1 OS=Homo sapiens GN=ACTB PE=1 SV=1;>sp|P63261|ACTG_HUMAN Actin, cytoplasmic 2 OS=Homo sapiens GN=ACTG1 PE=1 SV=1	MULTI-MSMS		JACB153_1	MDA-MB-231 R10K8	1081.16	3	1077.83	3230.45	33877.6	-0.66666	-0.60079	-1.2674	1078.49	1080.83	69.558	27.188	0.92369	69.558	69.246	70.17	0		0	0	0	9.3714e-27	2	24202	215.07	215.07	1	68.491	0.67249	0
VAPEEHPVLLTEAPLNPK	18	1	0	Unmodified	_VAPEEHPVLLTEAPLNPK_			0	0	CON__P60712;P60709;E7EVS6;G5E9R0;P63261;I3L4N8;I3L1U9;I3L3I0;J3KT65;I3L3R2;K7EM38	CON__P60712;P63261	CON__P60712	ACTB;ACTG1	Actin, cytoplasmic 1;Actin, cytoplasmic 1, N-terminally processed;Actin, cytoplasmic 2;Actin, cytoplasmic 2, N-terminally processed	>P60712 SWISS-PROT:P60712 (Bos taurus) Actin, cytoplasmic 1;>sp|P60709|ACTB_HUMAN Actin, cytoplasmic 1 OS=Homo sapiens GN=ACTB PE=1 SV=1;>tr|E7EVS6|E7EVS6_HUMAN Actin, cytoplasmic 1 (Fragment) OS=Homo sapiens GN=ACTB PE=1 SV=2;>tr|G5E9R0|G5E9R0_HUMAN Actin	MULTI-MSMS		JACB153_1	MDA-MB-231 R10K8	655.03	3	652.026	1953.06	43487.1	-0.41169	0.44055	0.028855	652.362	655.032	41.967	17.987	1.4755	41.967	41.626	43.102	-3.8147e-06		0	0	0	4.9028e-07	3	14083	103.04	18.902	1	68.574	0.35885	0
VLITTDLLAR	10	0	1	Unmodified	_VLITTDLLAR_			0	0	P60842;Q14240-2;Q14240;E7EQG2;Q9NZE6	P60842;Q14240-2	P60842	EIF4A1;EIF4A2	Eukaryotic initiation factor 4A-I;Eukaryotic initiation factor 4A-II	>sp|P60842|IF4A1_HUMAN Eukaryotic initiation factor 4A-I OS=Homo sapiens GN=EIF4A1 PE=1 SV=1;>sp|Q14240-2|IF4A2_HUMAN Isoform 2 of Eukaryotic initiation factor 4A-II OS=Homo sapiens GN=EIF4A2;>sp|Q14240|IF4A2_HUMAN Eukaryotic initiation factor 4A-II OS=Hom	MULTI-MSMS		JACB153_1	MDA-MB-231 R10K8	562.85	2	557.845	1113.68	47193.9	0.16087	0.099285	0.26016	557.845	562.849	52.829	21.608	0.58316	52.829	52.604	53.187	3.8147e-06		0	0	0	0.00098967	2	18122	112.71	100.55	1	68.643	8.9114	0
TIAPALVSK	9	1	0	Unmodified	_TIAPALVSK_			0	0	P06733;K7EM90	P06733	P06733	ENO1	Alpha-enolase	>sp|P06733|ENOA_HUMAN Alpha-enolase OS=Homo sapiens GN=ENO1 PE=1 SV=2;>tr|K7EM90|K7EM90_HUMAN Enolase (Fragment) OS=Homo sapiens GN=ENO1 PE=1 SV=1	MULTI-MSMS		JACB153_1	MDA-MB-231 R10K8	454.29	2	450.282	898.549	51862.1	-0.25503	-0.24702	-0.50205	450.282	454.289	29.297	13.766	0.55567	29.297	29.074	29.63	0		0	0	0	0.0079563	2	9050	70.1	63.837	1	68.756	0.74446	0
TIGGGDDSFNTFFSETGAGK	20	1	0	Unmodified	_TIGGGDDSFNTFFSETGAGK_			0	0	Q71U36;Q71U36-2;Q13748;Q6PEY2;Q13748-2;F8VQQ4;F8VS66;F8VRZ4;F8VWV9;F8VX09;F8W0F6;F8VRK0;F8VXZ7;F5H5D3;Q9BQE3;F8VVB9;P68363;CON__ENSEMBL:ENSBTAP00000016242	Q71U36;F5H5D3;P68363	P68363	TUBA1A;TUBA3C;TUBA3E;TUBA1C;TUBA1B	Tubulin alpha-1A chain;Tubulin alpha-3C/D chain;Tubulin alpha-3E chain;Tubulin alpha-1C chain;Tubulin alpha-1B chain	>sp|Q71U36|TBA1A_HUMAN Tubulin alpha-1A chain OS=Homo sapiens GN=TUBA1A PE=1 SV=1;>sp|Q71U36-2|TBA1A_HUMAN Isoform 2 of Tubulin alpha-1A chain OS=Homo sapiens GN=TUBA1A;>sp|Q13748|TBA3C_HUMAN Tubulin alpha-3C/D chain OS=Homo sapiens GN=TUBA3C PE=1 SV=3;>sp	MULTI-MSMS		JACB153_1	MDA-MB-231 R10K8	1008.46	2	1004.45	2006.89	34999.7	-0.55064	-0.11911	-0.66975	1004.95	1008.96	59.23	23.748	1.4522	59.23	58.9	60.352	0		0	0	0	2.0369e-21	4	20580	223.5	223.5	1	68.757	0.65238	0
TIQFVDWCPTGFK	13	1	0	Unmodified	_TIQFVDWCPTGFK_			0	0	Q71U36;Q71U36-2;Q13748;Q6PEY2;Q13748-2;V9GZ17;F5H5D3;Q9BQE3	Q71U36;F5H5D3	Q71U36	TUBA1A;TUBA3C;TUBA3E;TUBA1C	Tubulin alpha-1A chain;Tubulin alpha-3C/D chain;Tubulin alpha-3E chain;Tubulin alpha-1C chain	>sp|Q71U36|TBA1A_HUMAN Tubulin alpha-1A chain OS=Homo sapiens GN=TUBA1A PE=1 SV=1;>sp|Q71U36-2|TBA1A_HUMAN Isoform 2 of Tubulin alpha-1A chain OS=Homo sapiens GN=TUBA1A;>sp|Q13748|TBA3C_HUMAN Tubulin alpha-3C/D chain OS=Homo sapiens GN=TUBA3C PE=1 SV=3;>sp	MULTI-MSMS		JACB153_1	MDA-MB-231 R10K8	803.89	2	799.887	1597.76	38785	-0.42651	-0.35374	-0.78025	800.39	803.894	62.948	24.983	1.2922	62.948	62.629	63.921	-3.8147e-06		0	0	0	0.00010796	2	21788	116.19	116.19	1	68.801	1.1191	0
IINEPTAAAIAYGLDK	16	1	0	Unmodified	_IINEPTAAAIAYGLDK_			0	0	P11142;E9PKE3;P11142-2;E9PN89;E9PLF4;E9PI65;P54652;P11021	P11142;P54652;P11021	P11142	HSPA8;HSPA2;HSPA5	Heat shock cognate 71 kDa protein;Heat shock-related 70 kDa protein 2;78 kDa glucose-regulated protein	>sp|P11142|HSP7C_HUMAN Heat shock cognate 71 kDa protein OS=Homo sapiens GN=HSPA8 PE=1 SV=1;>tr|E9PKE3|E9PKE3_HUMAN Heat shock cognate 71 kDa protein OS=Homo sapiens GN=HSPA8 PE=1 SV=1;>sp|P11142-2|HSP7C_HUMAN Isoform 2 of Heat shock cognate 71 kDa protein	MULTI-MSMS		JACB153_1	MDA-MB-231 R10K8	834.96	2	830.451	1658.89	38614.2	-0.55985	-0.26909	-0.82894	830.952	834.458	53.549	21.852	0.77205	53.549	53.274	54.046	0		0	0	0	7.3252e-07	2	18380	123.97	118.31	1	68.877	0.8255	0
VPSTEAEALASSLMGLFEK	19	1	0	Unmodified	_VPSTEAEALASSLMGLFEK_			0	0	E7EU23;P50395;Q5SX87;Q5SX86;Q5SX90;V9GYF8	E7EU23	E7EU23	GDI2	Rab GDP dissociation inhibitor beta	>tr|E7EU23|E7EU23_HUMAN Rab GDP dissociation inhibitor beta OS=Homo sapiens GN=GDI2 PE=1 SV=1;>sp|P50395|GDIB_HUMAN Rab GDP dissociation inhibitor beta OS=Homo sapiens GN=GDI2 PE=1 SV=2;>tr|Q5SX87|Q5SX87_HUMAN Rab GDP dissociation inhibitor beta (Fragment)	MULTI-MSMS		JACB153_1	MDA-MB-231 R10K8	663.68	3	660.671	1978.99	42752.1	-0.24088	-0.054298	-0.29518	661.34	663.677	90.759	34.255	0.89229	90.759	90.351	91.244	-7.6294e-06		0	0	0	9.2812e-08	2	31665	120.39	120.39	1	69.069	2.067	0
QTVAVGVIK	9	1	0	Unmodified	_QTVAVGVIK_			0	0	Q05639;P68104;Q5VTE0	Q05639;P68104	P68104	EEF1A2;EEF1A1;EEF1A1P5	Elongation factor 1-alpha 2;Elongation factor 1-alpha 1;Putative elongation factor 1-alpha-like 3	>sp|Q05639|EF1A2_HUMAN Elongation factor 1-alpha 2 OS=Homo sapiens GN=EEF1A2 PE=1 SV=1;>sp|P68104|EF1A1_HUMAN Elongation factor 1-alpha 1 OS=Homo sapiens GN=EEF1A1 PE=1 SV=1;>sp|Q5VTE0|EF1A3_HUMAN Putative elongation factor 1-alpha-like 3 OS=Homo sapiens G	MULTI-MSMS		JACB153_1	MDA-MB-231 R10K8	461.79	2	457.787	913.56	50946.3	-0.38441	-0.56908	-0.95349	457.787	461.794	28.194	13.395	0.55579	28.194	27.92	28.476	0		0	0	0	0.0090133	1	8473	66.435	41.58	1	69.18	0.67286	0
FANYIDK	7	1	0	Unmodified	_FANYIDK_			0	0	P08670;B0YJC4	P08670	P08670	VIM	Vimentin	>sp|P08670|VIME_HUMAN Vimentin OS=Homo sapiens GN=VIM PE=1 SV=4;>tr|B0YJC4|B0YJC4_HUMAN Vimentin OS=Homo sapiens GN=VIM PE=1 SV=1	MULTI-MSMS		JACB153_1	MDA-MB-231 R10K8	439.73	2	435.721	869.428	51720.7	-0.082193	-0.27995	-0.36214	435.722	439.728	26.542	12.849	1.1549	26.542	26.221	27.376	0		0	0	0	0.0070454	2	7810	104.37	75.943	1	69.277	0.79277	0
SEVDMLK	7	1	0	Unmodified	_SEVDMLK_			0	0	P07355-2;P07355;A6NMY6	P07355-2	P07355-2	ANXA2;ANXA2P2	Annexin A2;Putative annexin A2-like protein	>sp|P07355-2|ANXA2_HUMAN Isoform 2 of Annexin A2 OS=Homo sapiens GN=ANXA2;>sp|P07355|ANXA2_HUMAN Annexin A2 OS=Homo sapiens GN=ANXA2 PE=1 SV=2;>sp|A6NMY6|AXA2L_HUMAN Putative annexin A2-like protein OS=Homo sapiens GN=ANXA2P2 PE=5 SV=2	MULTI-MSMS		JACB153_1	MDA-MB-231 R10K8	415.21	2	411.207	820.4	54181.1	0.23151	-0.25735	-0.02584	411.207	415.214	26.962	12.988	0.94702	26.962	26.626	27.573	0		0	0	0	0.007184	1	8015	100.19	49.222	1	69.419	1.1231	0
LQDEIQNMK	9	1	0	Unmodified	_LQDEIQNMK_			0	0	P08670;B0YJC4;B0YJC5	P08670	P08670	VIM	Vimentin	>sp|P08670|VIME_HUMAN Vimentin OS=Homo sapiens GN=VIM PE=1 SV=4;>tr|B0YJC4|B0YJC4_HUMAN Vimentin OS=Homo sapiens GN=VIM PE=1 SV=1;>tr|B0YJC5|B0YJC5_HUMAN Vimentin OS=Homo sapiens GN=VIM PE=1 SV=1	MULTI-MSMS		JACB153_1	MDA-MB-231 R10K8	563.79	2	559.779	1117.54	45884.2	-0.1728	-0.060847	-0.23365	559.78	563.786	25.602	12.532	0.85563	25.602	25.391	26.247	1.9073e-06		0	0	0	1.586e-05	1	7429	163.32	163.32	1	69.821	0.88	0
LVLDAFALPLTNLFK	15	1	0	Unmodified	_LVLDAFALPLTNLFK_			0	0	P55060;P55060-3;P55060-4;P55060-2	P55060	P55060	CSE1L	Exportin-2	>sp|P55060|XPO2_HUMAN Exportin-2 OS=Homo sapiens GN=CSE1L PE=1 SV=3;>sp|P55060-3|XPO2_HUMAN Isoform 3 of Exportin-2 OS=Homo sapiens GN=CSE1L;>sp|P55060-4|XPO2_HUMAN Isoform 4 of Exportin-2 OS=Homo sapiens GN=CSE1L;>sp|P55060-2|XPO2_HUMAN Isoform 2 of Expor	MULTI-MSMS		JACB153_1	MDA-MB-231 R10K8	842.5	2	837.995	1673.98	38500.9	-0.39163	-0.027192	-0.41882	838.498	842.504	94.945	47.429	0.67177	94.945	94.701	95.372	0		0	0	0	0.0018311	2	33098	80.534	80.534	1	69.951	2.1705	0
STTTGHLIYK	10	1	0	Unmodified	_STTTGHLIYK_			0	0	Q05639;P68104;Q5VTE0;Q5JR01;A6PW80	Q05639;P68104	P68104	EEF1A2;EEF1A1;EEF1A1P5	Elongation factor 1-alpha 2;Elongation factor 1-alpha 1;Putative elongation factor 1-alpha-like 3	>sp|Q05639|EF1A2_HUMAN Elongation factor 1-alpha 2 OS=Homo sapiens GN=EEF1A2 PE=1 SV=1;>sp|P68104|EF1A1_HUMAN Elongation factor 1-alpha 1 OS=Homo sapiens GN=EEF1A1 PE=1 SV=1;>sp|Q5VTE0|EF1A3_HUMAN Putative elongation factor 1-alpha-like 3 OS=Homo sapiens G	MULTI-MSMS		JACB153_1	MDA-MB-231 R10K8	376.88	3	374.205	1119.59	56564.4	-0.37806	0.36009	-0.017974	374.205	376.877	17.397	9.7969	1.3171	17.397	17.146	18.464	1.9073e-06		0	0	0	0.0049106	3	4281	81.338	71.683	1	69.961	0.69852	0
GFGFVTFDDHDPVDK	15	1	0	Unmodified	_GFGFVTFDDHDPVDK_			0	0	P22626;P22626-2	P22626	P22626	HNRNPA2B1	Heterogeneous nuclear ribonucleoproteins A2/B1	>sp|P22626|ROA2_HUMAN Heterogeneous nuclear ribonucleoproteins A2/B1 OS=Homo sapiens GN=HNRNPA2B1 PE=1 SV=2;>sp|P22626-2|ROA2_HUMAN Isoform A2 of Heterogeneous nuclear ribonucleoproteins A2/B1 OS=Homo sapiens GN=HNRNPA2B1	MULTI-MSMS		JACB153_1	MDA-MB-231 R10K8	568.6	3	565.926	1694.76	46875	0.15773	-0.26695	-0.10922	565.927	568.598	51.644	21.216	0.62245	51.644	51.388	52.011	0		0	0	0	1.6326e-05	2	17684	106.42	106.42	1	69.984	0.89539	0
LGVIEDHSNR	10	0	1	Unmodified	_LGVIEDHSNR_			0	0	P14625;Q58FF3	P14625	P14625	HSP90B1;HSP90B2P	Endoplasmin;Putative endoplasmin-like protein	>sp|P14625|ENPL_HUMAN Endoplasmin OS=Homo sapiens GN=HSP90B1 PE=1 SV=1;>sp|Q58FF3|ENPLL_HUMAN Putative endoplasmin-like protein OS=Homo sapiens GN=HSP90B2P PE=5 SV=1	MULTI-MSMS		JACB153_1	MDA-MB-231 R10K8	383.87	3	380.532	1138.57	55870.8	-0.29087	0.36315	0.072278	380.532	383.868	17.718	9.9058	0.37607	17.718	17.531	17.907	0		0	0	0	0.00086906	1	4414	121.83	115.35	1	70.048	9.0938	0
IITLTGPTNAIFK	13	1	0	Unmodified	_IITLTGPTNAIFK_			0	0	Q15365	Q15365	Q15365	PCBP1	Poly(rC)-binding protein 1	>sp|Q15365|PCBP1_HUMAN Poly(rC)-binding protein 1 OS=Homo sapiens GN=PCBP1 PE=1 SV=2	MULTI-MSMS		JACB153_1	MDA-MB-231 R10K8	698.92	2	694.911	1387.81	43655.2	-0.22767	0.037336	-0.19033	694.911	698.918	56.464	22.82	0.60164	56.464	56.242	56.844	3.8147e-06		0	0	0	0.00095469	1	19511	91.858	43.117	1	70.164	1.3306	0
MFGGPGTASR	10	0	1	Unmodified	_MFGGPGTASR_			0	0	P08670;B0YJC4	P08670	P08670	VIM	Vimentin	>sp|P08670|VIME_HUMAN Vimentin OS=Homo sapiens GN=VIM PE=1 SV=4;>tr|B0YJC4|B0YJC4_HUMAN Vimentin OS=Homo sapiens GN=VIM PE=1 SV=1	MULTI-MSMS		JACB153_1	MDA-MB-231 R10K8	495.74	2	490.735	979.455	48487.5	-0.15317	-0.36281	-0.51598	490.735	495.739	22.719	11.573	1.0687	22.719	22.399	23.467	0		0	0	0	0.00087205	1	6313	121.6	116.12	1	70.561	9.1605	0
LGGSAVISLEGKPL	14	1	0	Unmodified	_LGGSAVISLEGKPL_			0	0	E9PK25;P23528;G3V1A4	E9PK25	E9PK25	CFL1	Cofilin-1	>tr|E9PK25|E9PK25_HUMAN Cofilin-1 OS=Homo sapiens GN=CFL1 PE=1 SV=1;>sp|P23528|COF1_HUMAN Cofilin-1 OS=Homo sapiens GN=CFL1 PE=1 SV=3;>tr|G3V1A4|G3V1A4_HUMAN Cofilin 1 (Non-muscle), isoform CRA_a OS=Homo sapiens GN=CFL1 PE=1 SV=1	MULTI-MSMS		JACB153_1	MDA-MB-231 R10K8	674.9	2	670.893	1339.77	43143.9	-0.42097	-0.0089565	-0.42993	670.893	674.9	50.113	20.706	1.5844	50.113	49.785	51.369	0		0	0	0	2.4234e-05	4	17074	137.81	130.93	1	70.651	0.83289	0
GILAADESTGSIAK	14	1	0	Unmodified	_GILAADESTGSIAK_			0	0	P04075-2;P04075;J3KPS3;H3BQN4;H3BPS8;H3BUH7	P04075-2	P04075-2	ALDOA	Fructose-bisphosphate aldolase A;Fructose-bisphosphate aldolase	>sp|P04075-2|ALDOA_HUMAN Isoform 2 of Fructose-bisphosphate aldolase A OS=Homo sapiens GN=ALDOA;>sp|P04075|ALDOA_HUMAN Fructose-bisphosphate aldolase A OS=Homo sapiens GN=ALDOA PE=1 SV=2;>tr|J3KPS3|J3KPS3_HUMAN Fructose-bisphosphate aldolase OS=Homo sapien	MULTI-MSMS		JACB153_1	MDA-MB-231 R10K8	670.86	2	666.854	1331.69	42923.7	-0.77793	0.31457	-0.46337	666.855	670.861	33.66	15.218	0.43332	33.66	33.432	33.865	0		0	0	0	5.2356e-06	1	10667	147.18	129.59	1	70.684	0.80979	0
VTLATLK	7	1	0	Unmodified	_VTLATLK_			0	0	P06748;P06748-2;P06748-3;E5RI98	P06748	P06748	NPM1	Nucleophosmin	>sp|P06748|NPM_HUMAN Nucleophosmin OS=Homo sapiens GN=NPM1 PE=1 SV=2;>sp|P06748-2|NPM_HUMAN Isoform 2 of Nucleophosmin OS=Homo sapiens GN=NPM1;>sp|P06748-3|NPM_HUMAN Isoform 3 of Nucleophosmin OS=Homo sapiens GN=NPM1;>tr|E5RI98|E5RI98_HUMAN Nucleophosmin (	MULTI-MSMS		JACB153_1	MDA-MB-231 R10K8	377.25	2	373.245	744.475	56660.9	-0.021333	-0.87382	-0.89516	373.245	377.251	28.475	13.489	0.83373	28.475	28.258	29.091	1.9073e-06		0	0	0	0.01185	1	8596	82.671	15.989	1	70.857	0.84544	0
DISLSDYK	8	1	0	Unmodified	_DISLSDYK_			0	0	Q06830	Q06830	Q06830	PRDX1	Peroxiredoxin-1	>sp|Q06830|PRDX1_HUMAN Peroxiredoxin-1 OS=Homo sapiens GN=PRDX1 PE=1 SV=1	MULTI-MSMS		JACB153_1	MDA-MB-231 R10K8	474.74	2	470.735	939.455	51286.7	0.020582	0.06003	0.080612	470.735	474.742	36.777	16.258	0.71189	36.777	36.503	37.215	0		0	0	0	0.0070228	1	11906	79.906	17.944	1	71.104	1.1373	0
TLVLLMGK	8	1	0	Unmodified	_TLVLLMGK_			0	0	P07737;K7EJ44;CON__P02584	P07737	P07737	PFN1	Profilin-1	>sp|P07737|PROF1_HUMAN Profilin-1 OS=Homo sapiens GN=PFN1 PE=1 SV=2;>tr|K7EJ44|K7EJ44_HUMAN Profilin 1, isoform CRA_b OS=Homo sapiens GN=PFN1 PE=1 SV=1;>P02584 SWISS-PROT:P02584 (Bos taurus) Profilin-1	MULTI-MSMS		JACB153_1	MDA-MB-231 R10K8	441.78	2	437.775	873.536	52126.9	-0.18186	-0.3283	-0.51016	437.775	441.782	47.751	19.914	1.8049	47.751	47.174	48.979	0		0	0	0	0.009353	4	16326	72.485	72.485	1	71.219	0.94767	0
VCNPIITK	8	1	0	Unmodified	_VCNPIITK_			0	0	P11142;E9PKE3;E9PNE6;A8K7Q2;E9PS65	P11142	P11142	HSPA8	Heat shock cognate 71 kDa protein	>sp|P11142|HSP7C_HUMAN Heat shock cognate 71 kDa protein OS=Homo sapiens GN=HSPA8 PE=1 SV=1;>tr|E9PKE3|E9PKE3_HUMAN Heat shock cognate 71 kDa protein OS=Homo sapiens GN=HSPA8 PE=1 SV=1;>tr|E9PNE6|E9PNE6_HUMAN Heat shock cognate 71 kDa protein OS=Homo sapie	MULTI-MSMS		JACB153_1	MDA-MB-231 R10K8	476.77	2	472.765	943.516	49995.1	0.22849	-0.63235	-0.40386	472.766	476.772	24.977	12.325	0.64563	24.977	24.766	25.411	0		0	0	0	0.0050451	2	7166	86.205	71.054	1	71.251	1.2257	0
SIQFVDWCPTGFK	13	1	0	Unmodified	_SIQFVDWCPTGFK_			0	0	P68366;A8MUB1;P68363;CON__ENSEMBL:ENSBTAP00000016242	P68366;P68363	P68363	TUBA4A;TUBA1B	Tubulin alpha-4A chain;Tubulin alpha-1B chain	>sp|P68366|TBA4A_HUMAN Tubulin alpha-4A chain OS=Homo sapiens GN=TUBA4A PE=1 SV=1;>tr|A8MUB1|A8MUB1_HUMAN Tubulin alpha-4A chain OS=Homo sapiens GN=TUBA4A PE=1 SV=1;>sp|P68363|TBA1B_HUMAN Tubulin alpha-1B chain OS=Homo sapiens GN=TUBA1B PE=1 SV=1;>ENSEMBL:	MULTI-MSMS		JACB153_1	MDA-MB-231 R10K8	796.89	2	792.879	1583.74	39317.1	-0.54326	-0.045312	-0.58858	792.88	796.887	62.444	24.81	0.94692	62.444	62.118	63.065	0		0	0	0	4.3309e-05	1	21643	136.3	136.3	1	71.319	0.72627	0
DQLIYNLLK	9	1	0	Unmodified	_DQLIYNLLK_			0	0	P00338-3;P00338;P00338-4;P00338-2;P00338-5;F5GXY2;F5GYU2;F5GXH2;F5H6W8;F5H5J4;F5GZQ4;F5GWW2;F5GXC7;F5H8H6;F5GXU1	P00338-3	P00338-3	LDHA	L-lactate dehydrogenase A chain	>sp|P00338-3|LDHA_HUMAN Isoform 3 of L-lactate dehydrogenase A chain OS=Homo sapiens GN=LDHA;>sp|P00338|LDHA_HUMAN L-lactate dehydrogenase A chain OS=Homo sapiens GN=LDHA PE=1 SV=2;>sp|P00338-4|LDHA_HUMAN Isoform 4 of L-lactate dehydrogenase A chain OS=Hom	MULTI-MSMS		JACB153_1	MDA-MB-231 R10K8	564.33	2	560.324	1118.63	47055	0.21329	-0.23417	-0.020884	560.324	564.331	61.624	24.543	1.2451	61.624	61.331	62.576	0		0	0	0	0.0010232	3	21438	99.136	88.612	1	71.32	0.72025	0
TDAAVSFAK	9	1	0	Acetyl (Protein N-term)	_(ac)TDAAVSFAK_			1	0	P05141	P05141	P05141	SLC25A5	ADP/ATP translocase 2	>sp|P05141|ADT2_HUMAN ADP/ATP translocase 2 OS=Homo sapiens GN=SLC25A5 PE=1 SV=7	MULTI-MSMS		JACB153_1	MDA-MB-231 R10K8	480.25	2	476.243	950.471	49693.6	0.63352	-0.35906	0.27446	476.242	480.25	43.453	18.481	0.53785	43.453	43.246	43.783	0		0	0	0	0.00069021	1	14566	103.7	69.611	1	71.698	1.4477	0
FYEAFSK	7	1	0	Unmodified	_FYEAFSK_			0	0	P08238	P08238	P08238	HSP90AB1	Heat shock protein HSP 90-beta	>sp|P08238|HS90B_HUMAN Heat shock protein HSP 90-beta OS=Homo sapiens GN=HSP90AB1 PE=1 SV=4	MULTI-MSMS		JACB153_1	MDA-MB-231 R10K8	450.22	2	446.216	890.417	52134.9	-0.10421	0.022574	-0.081638	446.216	450.223	31.294	14.433	1.0446	31.294	30.941	31.986	0		0	0	0	0.0092735	1	9700	89.142	89.142	1	71.91	1.1876	0
SFVLNLGK	8	1	0	Unmodified	_SFVLNLGK_			0	0	P09382	P09382	P09382	LGALS1	Galectin-1	>sp|P09382|LEG1_HUMAN Galectin-1 OS=Homo sapiens GN=LGALS1 PE=1 SV=2	MULTI-MSMS		JACB153_1	MDA-MB-231 R10K8	443.27	2	439.261	876.507	52548.7	-0.041231	-0.46026	-0.5015	439.261	443.268	44.966	18.989	0.96052	44.966	44.752	45.712	0		0	0	0	0.0025334	2	15133	98.997	64.189	1	71.974	0.80687	0
VLNNMEIGTSLFDEEGAK	18	1	0	Unmodified	_VLNNMEIGTSLFDEEGAK_			0	0	P00558;B7Z7A9;E7ERH5	P00558	P00558	PGK1	Phosphoglycerate kinase 1;Phosphoglycerate kinase	>sp|P00558|PGK1_HUMAN Phosphoglycerate kinase 1 OS=Homo sapiens GN=PGK1 PE=1 SV=3;>tr|B7Z7A9|B7Z7A9_HUMAN Phosphoglycerate kinase OS=Homo sapiens GN=PGK1 PE=1 SV=1;>tr|E7ERH5|E7ERH5_HUMAN Phosphoglycerate kinase OS=Homo sapiens GN=PGK1 PE=1 SV=1	MULTI-MSMS		JACB153_1	MDA-MB-231 R10K8	987.98	2	983.975	1965.94	35312.8	-0.58264	0.051306	-0.53134	983.975	987.982	59.2	23.732	0.59141	59.2	58.96	59.552	3.8147e-06		0	0	0	3.7623e-21	2	20471	240.79	240.79	1	72.057	1.1819	0
AVVGVVAGGGR	11	0	1	Unmodified	_AVVGVVAGGGR_			0	0	P62917;E9PKU4;E9PKZ0;E9PP36	P62917	P62917	RPL8	60S ribosomal protein L8	>sp|P62917|RL8_HUMAN 60S ribosomal protein L8 OS=Homo sapiens GN=RPL8 PE=1 SV=2;>tr|E9PKU4|E9PKU4_HUMAN 60S ribosomal protein L8 (Fragment) OS=Homo sapiens GN=RPL8 PE=1 SV=1;>tr|E9PKZ0|E9PKZ0_HUMAN 60S ribosomal protein L8 (Fragment) OS=Homo sapiens GN=RPL	MULTI-MSMS		JACB153_1	MDA-MB-231 R10K8	476.28	2	471.28	940.545	50362.8	0.1625	-0.078336	0.08416	471.28	476.284	23.718	11.903	0.4873	23.718	23.513	24	0		0	0	0	0.0049001	1	6681	84.17	56.428	1	72.415	9.4012	0
NPDDITQEEYGEFYK	15	1	0	Unmodified	_NPDDITQEEYGEFYK_			0	0	P08238	P08238	P08238	HSP90AB1	Heat shock protein HSP 90-beta	>sp|P08238|HS90B_HUMAN Heat shock protein HSP 90-beta OS=Homo sapiens GN=HSP90AB1 PE=1 SV=4	MULTI-MSMS		JACB153_1	MDA-MB-231 R10K8	928.41	2	924.402	1846.79	36653.8	-0.73707	-0.011371	-0.74844	924.904	928.409	46.967	19.66	0.95628	46.967	46.586	47.543	0		0	0	0	3.7805e-13	3	16032	217.48	217.48	1	72.502	0.92986	0
DLTDYLMK	8	1	0	Unmodified	_DLTDYLMK_			0	0	CON__P60712;P60709;Q562R1;P68032;P68133;P62736;P63267;Q5T8M7;P63267-2;P63261;I3L4N8;I3L1U9;I3L3I0	CON__P60712;P68032;P63261	CON__P60712	ACTB;ACTBL2;ACTC1;ACTA1;ACTA2;ACTG2;ACTG1	Actin, cytoplasmic 1;Actin, cytoplasmic 1, N-terminally processed;Beta-actin-like protein 2;Actin, alpha cardiac muscle 1;Actin, alpha skeletal muscle;Actin, aortic smooth muscle;Actin, gamma-enteric smooth muscle;Actin, cytoplasmic 2;Actin, cytoplasmic 2, N-terminally processed	>P60712 SWISS-PROT:P60712 (Bos taurus) Actin, cytoplasmic 1;>sp|P60709|ACTB_HUMAN Actin, cytoplasmic 1 OS=Homo sapiens GN=ACTB PE=1 SV=1;>sp|Q562R1|ACTBL_HUMAN Beta-actin-like protein 2 OS=Homo sapiens GN=ACTBL2 PE=1 SV=2;>sp|P68032|ACTC_HUMAN Actin, alpha	MULTI-MSMS		JACB153_1	MDA-MB-231 R10K8	503.75	2	499.747	997.479	48304.4	0.086589	-1.1692	-1.0826	499.747	503.754	56.926	22.975	1.5935	56.926	56.599	58.192	-3.8147e-06		0	0	0	0.0065864	5	19616	81.296	52.135	1	72.521	0.5607	0
ILLAELEQLK	10	1	0	Unmodified	_ILLAELEQLK_			0	0	P08670;B0YJC4	P08670	P08670	VIM	Vimentin	>sp|P08670|VIME_HUMAN Vimentin OS=Homo sapiens GN=VIM PE=1 SV=4;>tr|B0YJC4|B0YJC4_HUMAN Vimentin OS=Homo sapiens GN=VIM PE=1 SV=1	MULTI-MSMS		JACB153_1	MDA-MB-231 R10K8	589.37	2	585.361	1168.71	45768.9	-0.16182	0.16289	0.0010689	585.361	589.368	58.322	23.443	2.7789	58.322	58.022	60.8	-3.8147e-06		0	0	0	0.00058401	6	20245	134.59	103.16	1	72.551	0.46881	0
GALQNIIPASTGAAK	15	1	0	Unmodified	_GALQNIIPASTGAAK_			0	0	P04406;P04406-2;E7EUT5	P04406	P04406	GAPDH	Glyceraldehyde-3-phosphate dehydrogenase	>sp|P04406|G3P_HUMAN Glyceraldehyde-3-phosphate dehydrogenase OS=Homo sapiens GN=GAPDH PE=1 SV=3;>sp|P04406-2|G3P_HUMAN Isoform 2 of Glyceraldehyde-3-phosphate dehydrogenase OS=Homo sapiens GN=GAPDH;>tr|E7EUT5|E7EUT5_HUMAN Glyceraldehyde-3-phosphate dehydr	MULTI-MSMS		JACB153_1	MDA-MB-231 R10K8	710.41	2	706.399	1410.78	41631.6	-0.21786	-0.33971	-0.55758	706.399	710.406	42.025	18.01	0.69875	42.025	41.681	42.38	0		0	0	0	0.00024327	3	13953	92.265	66.944	1	72.58	0.61215	0
AIFAGYK	7	1	0	Unmodified	_AIFAGYK_			0	0	P18077;C9K025;F8WB72;F8WBS5	P18077	P18077	RPL35A	60S ribosomal protein L35a	>sp|P18077|RL35A_HUMAN 60S ribosomal protein L35a OS=Homo sapiens GN=RPL35A PE=1 SV=2;>tr|C9K025|C9K025_HUMAN 60S ribosomal protein L35a (Fragment) OS=Homo sapiens GN=RPL35A PE=1 SV=1;>tr|F8WB72|F8WB72_HUMAN 60S ribosomal protein L35a OS=Homo sapiens GN=RP	MULTI-MSMS		JACB153_1	MDA-MB-231 R10K8	389.72	2	385.216	768.417	54406.6	-0.11699	-2.0967	-2.2137	385.216	389.223	29.656	13.881	0.60472	29.656	29.329	29.934	-1.9073e-06		0	0	0	0.016486	1	9064	71.029	64.99	1	72.596	2.1073	0
GIVDQSQQAYQEAFEISK	18	1	0	Unmodified	_GIVDQSQQAYQEAFEISK_			0	0	P63104;E7EX29;B0AZS6;P63104-2;H0YB80;B7Z2E6	P63104	P63104	YWHAZ	14-3-3 protein zeta/delta	>sp|P63104|1433Z_HUMAN 14-3-3 protein zeta/delta OS=Homo sapiens GN=YWHAZ PE=1 SV=1;>tr|E7EX29|E7EX29_HUMAN 14-3-3 protein zeta/delta (Fragment) OS=Homo sapiens GN=YWHAZ PE=1 SV=1;>tr|B0AZS6|B0AZS6_HUMAN 14-3-3 protein zeta/delta OS=Homo sapiens GN=YWHAZ P	MULTI-MSMS		JACB153_1	MDA-MB-231 R10K8	1025.51	2	1021	2039.98	34821.3	-0.77394	-0.042745	-0.81669	1021.5	1025.51	57.105	23.037	0.66526	57.105	56.864	57.53	0		0	0	0	7.1726e-14	2	19702	185.33	185.33	1	72.606	1.0091	0
DSYVGDEAQSK	11	1	0	Unmodified	_DSYVGDEAQSK_			0	0	CON__P60712;P60709;E7EVS6;G5E9R0;C9JZR7;C9JUM1;C9JTX5;P68032;P68133;P62736;P63267;A6NL76;Q5T8M8;Q5T8M7;F6QUT6;F6UVQ4;C9JFL5;B8ZZJ2;F8WB63;P63261;I3L4N8;I3L1U9;I3L3I0;J3KT65;I3L3R2;K7EM38	CON__P60712;P68032;P63261	CON__P60712	ACTB;ACTC1;ACTA1;ACTA2;ACTG2;ACTG1	Actin, cytoplasmic 1;Actin, cytoplasmic 1, N-terminally processed;Actin, alpha cardiac muscle 1;Actin, alpha skeletal muscle;Actin, aortic smooth muscle;Actin, gamma-enteric smooth muscle;Actin, cytoplasmic 2;Actin, cytoplasmic 2, N-terminally processed	>P60712 SWISS-PROT:P60712 (Bos taurus) Actin, cytoplasmic 1;>sp|P60709|ACTB_HUMAN Actin, cytoplasmic 1 OS=Homo sapiens GN=ACTB PE=1 SV=1;>tr|E7EVS6|E7EVS6_HUMAN Actin, cytoplasmic 1 (Fragment) OS=Homo sapiens GN=ACTB PE=1 SV=2;>tr|G5E9R0|G5E9R0_HUMAN Actin	MULTI-MSMS		JACB153_1	MDA-MB-231 R10K8	603.77	2	599.765	1197.52	44409.6	-0.14879	-0.109	-0.25779	599.765	603.772	18.621	10.202	0.88426	18.621	18.403	19.287	0		0	0	0	0.00050917	2	4746	120.32	116.78	1	72.958	0.88872	0
AGITTIEAVK	10	1	0	Acetyl (Protein N-term)	_(ac)AGITTIEAVK_			1	0	P06753-2;Q5VU59;P06753-5;P06753-6;P06753-3;Q5VU61;P06753-4;D6R904;D6RFM2	P06753-2	P06753-2	TPM3		>sp|P06753-2|TPM3_HUMAN Isoform 2 of Tropomyosin alpha-3 chain OS=Homo sapiens GN=TPM3;>tr|Q5VU59|Q5VU59_HUMAN Uncharacterized protein OS=Homo sapiens GN=TPM3 PE=1 SV=1;>sp|P06753-5|TPM3_HUMAN Isoform 5 of Tropomyosin alpha-3 chain OS=Homo sapiens GN=TPM3;	MULTI-MSMS		JACB153_1	MDA-MB-231 R10K8	526.81	2	522.8	1043.59	48101	0.40935	-0.20712	0.20223	522.8	526.807	52.676	21.559	0.66338	52.676	52.351	53.015	0		0	0	0	0.0049996	1	18075	74.533	41.927	1	73.004	1.1373	0
YESLTDPSK	9	1	0	Unmodified	_YESLTDPSK_			0	0	P07900-2;P07900;Q14568;G3V2J8;P08238;Q58FF7;Q58FF8;Q5T9W8;Q58FF6	P07900-2;P08238;Q58FF6	P07900-2	HSP90AA1;HSP90AA2;HSP90AB1;HSP90AB3P;HSP90AB2P;HSP90AB4P	Heat shock protein HSP 90-alpha;Putative heat shock protein HSP 90-alpha A2;Heat shock protein HSP 90-beta;Putative heat shock protein HSP 90-beta-3;Putative heat shock protein HSP 90-beta 2;Putative heat shock protein HSP 90-beta 4	>sp|P07900-2|HS90A_HUMAN Isoform 2 of Heat shock protein HSP 90-alpha OS=Homo sapiens GN=HSP90AA1;>sp|P07900|HS90A_HUMAN Heat shock protein HSP 90-alpha OS=Homo sapiens GN=HSP90AA1 PE=1 SV=5;>sp|Q14568|HS902_HUMAN Putative heat shock protein HSP 90-alpha A	MULTI-MSMS		JACB153_1	MDA-MB-231 R10K8	524.26	2	520.251	1038.49	48523.7	0.12425	0.16766	0.29191	520.251	524.258	22.594	11.535	0.69849	22.594	22.229	22.927	0		0	0	0	0.00058182	2	6259	127.4	115.16	1	73.135	1.2738	0
LLEPVLLLGK	10	1	0	Unmodified	_LLEPVLLLGK_			0	0	P62249;M0R210;M0R3H0;Q6IPX4;M0R1M5;M0QX76	P62249	P62249	RPS16	40S ribosomal protein S16	>sp|P62249|RS16_HUMAN 40S ribosomal protein S16 OS=Homo sapiens GN=RPS16 PE=1 SV=2;>tr|M0R210|M0R210_HUMAN 40S ribosomal protein S16 OS=Homo sapiens GN=RPS16 PE=1 SV=1;>tr|M0R3H0|M0R3H0_HUMAN 40S ribosomal protein S16 OS=Homo sapiens GN=RPS16 PE=1 SV=1;>tr	MULTI-MSMS		JACB153_1	MDA-MB-231 R10K8	551.87	2	547.863	1093.71	47848.4	0.42266	0.048134	0.47079	547.863	551.87	63.116	25.037	0.85469	63.116	62.854	63.709	0		0	0	0	0.00093932	2	22007	116.52	116.52	1	73.154	1.2587	0
ALANSLACQGK	11	1	0	Unmodified	_ALANSLACQGK_			0	0	P04075-2;P04075;J3KPS3;H3BR68	P04075-2	P04075-2	ALDOA	Fructose-bisphosphate aldolase A	>sp|P04075-2|ALDOA_HUMAN Isoform 2 of Fructose-bisphosphate aldolase A OS=Homo sapiens GN=ALDOA;>sp|P04075|ALDOA_HUMAN Fructose-bisphosphate aldolase A OS=Homo sapiens GN=ALDOA PE=1 SV=2;>tr|J3KPS3|J3KPS3_HUMAN Fructose-bisphosphate aldolase OS=Homo sapien	MULTI-MSMS		JACB153_1	MDA-MB-231 R10K8	570.8	2	566.793	1131.57	46804.5	-0.036875	0.58985	0.55298	566.793	570.8	22.235	11.413	0.66674	22.235	21.991	22.658	0		0	0	0	5.7764e-09	1	6100	188.87	188.87	1	73.263	1.3117	0
ALMDEVVK	8	1	0	Unmodified	_ALMDEVVK_			0	0	P00558;B7Z7A9;E7ERH5	P00558	P00558	PGK1	Phosphoglycerate kinase 1;Phosphoglycerate kinase	>sp|P00558|PGK1_HUMAN Phosphoglycerate kinase 1 OS=Homo sapiens GN=PGK1 PE=1 SV=3;>tr|B7Z7A9|B7Z7A9_HUMAN Phosphoglycerate kinase OS=Homo sapiens GN=PGK1 PE=1 SV=1;>tr|E7ERH5|E7ERH5_HUMAN Phosphoglycerate kinase OS=Homo sapiens GN=PGK1 PE=1 SV=1	MULTI-MSMS		JACB153_1	MDA-MB-231 R10K8	456.75	2	452.744	903.474	50814.2	0.11501	0.19995	0.31496	452.744	456.751	35.471	15.824	0.42879	35.471	35.281	35.71	0		0	0	0	0.010314	1	11404	69.423	36.583	1	73.298	1.0075	0
LAVYIDR	7	0	1	Unmodified	_LAVYIDR_			0	0	P02545;P02545-3;P02545-6;P02545-2	P02545;P02545-2	P02545	LMNA	Prelamin-A/C;Lamin-A/C	>sp|P02545|LMNA_HUMAN Prelamin-A/C OS=Homo sapiens GN=LMNA PE=1 SV=1;>sp|P02545-3|LMNA_HUMAN Isoform ADelta10 of Prelamin-A/C OS=Homo sapiens GN=LMNA;>sp|P02545-6|LMNA_HUMAN Isoform 6 of Prelamin-A/C OS=Homo sapiens GN=LMNA;>sp|P02545-2|LMNA_HUMAN Isoform	MULTI-MSMS		JACB153_1	MDA-MB-231 R10K8	430.25	2	425.245	848.476	53079.2	0.17558	-0.14122	0.034361	425.244	430.249	32.613	14.874	0.67194	32.613	32.344	33.016	0		0	0	0	0.013996	1	10228	77.282	16.924	1	73.314	9.5179	0
EDVLTLLLPVMGDSK	15	1	0	Unmodified	_EDVLTLLLPVMGDSK_			0	0	Q13200;E7EW34;E9PCS3	Q13200	Q13200	PSMD2	26S proteasome non-ATPase regulatory subunit 2	>sp|Q13200|PSMD2_HUMAN 26S proteasome non-ATPase regulatory subunit 2 OS=Homo sapiens GN=PSMD2 PE=1 SV=3;>tr|E7EW34|E7EW34_HUMAN 26S proteasome non-ATPase regulatory subunit 2 OS=Homo sapiens GN=PSMD2 PE=1 SV=1;>tr|E9PCS3|E9PCS3_HUMAN 26S proteasome non-AT	MULTI-MSMS		JACB153_1	MDA-MB-231 R10K8	819.45	2	815.442	1628.87	38726.1	-0.43443	0.38031	-0.054117	815.943	819.45	87.121	33.04	0.67306	87.121	86.732	87.405	0		0	0	0	1.2758e-06	1	30394	124.09	124.09	1	73.475	2.476	0
CDENILWLDYK	11	1	0	Unmodified	_CDENILWLDYK_			0	0	P14618;P14618-3;H3BQ34;H3BTJ2;H3BUW1;P14618-2;H3BTN5	P14618;P14618-2	P14618	PKM2	Pyruvate kinase isozymes M1/M2;Pyruvate kinase	>sp|P14618|KPYM_HUMAN Pyruvate kinase PKM OS=Homo sapiens GN=PKM PE=1 SV=4;>sp|P14618-3|KPYM_HUMAN Isoform 3 of Pyruvate kinase PKM OS=Homo sapiens GN=PKM;>tr|H3BQ34|H3BQ34_HUMAN Pyruvate kinase OS=Homo sapiens GN=PKM PE=1 SV=1;>tr|H3BTJ2|H3BTJ2_HUMAN Pyru	MULTI-MSMS		JACB153_1	MDA-MB-231 R10K8	738.85	2	734.842	1467.67	39870.7	0.052027	-0.53014	-0.47811	734.842	738.85	59.907	23.969	0.68777	59.907	59.633	60.321	0		0	0	0	3.4696e-09	2	20731	201	201	1	73.51	1.3175	0
VAVLGASGGIGQPLSLLLK	19	1	0	Unmodified	_VAVLGASGGIGQPLSLLLK_			0	0	P40926;E9PDB2	P40926	P40926	MDH2	Malate dehydrogenase, mitochondrial	>sp|P40926|MDHM_HUMAN Malate dehydrogenase, mitochondrial OS=Homo sapiens GN=MDH2 PE=1 SV=3;>tr|E9PDB2|E9PDB2_HUMAN Malate dehydrogenase, mitochondrial OS=Homo sapiens GN=MDH2 PE=1 SV=1	MULTI-MSMS		JACB153_1	MDA-MB-231 R10K8	901.56	2	897.048	1792.08	36704.5	-0.5421	0.27485	-0.26725	897.049	901.056	74.199	28.73	0.89346	74.199	73.674	74.567	0		0	0	0	4.1858e-11	2	25949	144.68	144.68	1	73.609	1.863	0
SLADELALVDVLEDK	15	1	0	Unmodified	_SLADELALVDVLEDK_			0	0	P07195;A8MW50;C9J7H8;F5H793	P07195	P07195	LDHB	L-lactate dehydrogenase B chain;L-lactate dehydrogenase	>sp|P07195|LDHB_HUMAN L-lactate dehydrogenase B chain OS=Homo sapiens GN=LDHB PE=1 SV=2;>tr|A8MW50|A8MW50_HUMAN L-lactate dehydrogenase (Fragment) OS=Homo sapiens GN=LDHB PE=1 SV=1;>tr|C9J7H8|C9J7H8_HUMAN L-lactate dehydrogenase B chain (Fragment) OS=Homo	MULTI-MSMS		JACB153_1	MDA-MB-231 R10K8	819.44	2	815.433	1628.85	38586.3	-0.48363	-0.21439	-0.69803	815.434	819.44	80.137	30.715	1.0305	80.137	79.769	80.8	0		0	0	0	4.6958e-09	2	28055	171.91	159.89	1	73.662	1.27	0
VFIMDSCDELIPEYLNFIR	19	0	1	Unmodified	_VFIMDSCDELIPEYLNFIR_			0	0	P08238	P08238	P08238	HSP90AB1	Heat shock protein HSP 90-beta	>sp|P08238|HS90B_HUMAN Heat shock protein HSP 90-beta OS=Homo sapiens GN=HSP90AB1 PE=1 SV=4	MULTI-MSMS		JACB153_1	MDA-MB-231 R10K8	1193.08	2	1187.58	2373.14	31913.2	-0.33332	-0.29255	-0.62587	1188.58	1193.08	89.013	33.669	0.98586	89.013	88.712	89.697	0		0	0	0	3.0109e-16	2	31113	199.08	199.08	1	73.721	9.5707	0
VNQIGSVTESLQACK	15	1	0	Unmodified	_VNQIGSVTESLQACK_			0	0	P06733;P06733-2	P06733	P06733	ENO1	Alpha-enolase	>sp|P06733|ENOA_HUMAN Alpha-enolase OS=Homo sapiens GN=ENO1 PE=1 SV=2;>sp|P06733-2|ENOA_HUMAN Isoform MBP-1 of Alpha-enolase OS=Homo sapiens GN=ENO1	MULTI-MSMS		JACB153_1	MDA-MB-231 R10K8	821.42	2	817.414	1632.81	38571.9	-0.43568	-0.50795	-0.94363	817.414	821.421	37.671	16.555	1.4134	37.671	37.293	38.707	3.8147e-06		0	0	0	1.5682e-09	2	12379	182.57	0	1	73.801	0.80393	0
WGDAGAEYVVESTGVFTTMEK	21	1	0	Unmodified	_WGDAGAEYVVESTGVFTTMEK_			0	0	P04406;P04406-2;E7EUT5	P04406	P04406	GAPDH	Glyceraldehyde-3-phosphate dehydrogenase	>sp|P04406|G3P_HUMAN Glyceraldehyde-3-phosphate dehydrogenase OS=Homo sapiens GN=GAPDH PE=1 SV=3;>sp|P04406-2|G3P_HUMAN Isoform 2 of Glyceraldehyde-3-phosphate dehydrogenase OS=Homo sapiens GN=GAPDH;>tr|E7EUT5|E7EUT5_HUMAN Glyceraldehyde-3-phosphate dehydr	MULTI-MSMS		JACB153_1	MDA-MB-231 R10K8	762.69	3	759.684	2276.03	40182.5	-0.59131	0.12335	-0.46796	759.684	762.69	68.749	26.917	1.775	68.749	68.299	70.074	0		0	0	0	6.279e-12	4	23981	128.74	124.48	1	73.981	1.7831	0
LPDGYEFK	8	1	0	Unmodified	_LPDGYEFK_			0	0	P09382	P09382	P09382	LGALS1	Galectin-1	>sp|P09382|LEG1_HUMAN Galectin-1 OS=Homo sapiens GN=LGALS1 PE=1 SV=2	MULTI-MSMS		JACB153_1	MDA-MB-231 R10K8	488.75	2	484.74	967.465	50145	0.55296	0.31224	0.86519	484.74	488.747	35.421	15.808	1.3457	35.421	34.988	36.334	0		0	0	0	0.0024801	2	11501	101.54	101.54	1	74.446	0.85808	0
GFGFILFK	8	1	0	Unmodified	_GFGFILFK_			0	0	Q99729-2;D6RBZ0;Q99729-3;D6RD18;D6R9P3;Q99729;Q99729-4	Q99729-2	Q99729-2	HNRNPAB	Heterogeneous nuclear ribonucleoprotein A/B	>sp|Q99729-2|ROAA_HUMAN Isoform 2 of Heterogeneous nuclear ribonucleoprotein A/B OS=Homo sapiens GN=HNRNPAB;>tr|D6RBZ0|D6RBZ0_HUMAN Heterogeneous nuclear ribonucleoprotein A/B OS=Homo sapiens GN=HNRNPAB PE=1 SV=1;>sp|Q99729-3|ROAA_HUMAN Isoform 3 of Hetero	MULTI-MSMS		JACB153_1	MDA-MB-231 R10K8	468.78	2	464.768	927.522	51039.4	0.34305	-0.11619	0.22686	464.768	468.775	66.256	26.083	0.69993	66.256	65.963	66.663	0		0	0	0	0.0029354	2	23004	92.925	92.925	1	74.541	2.1213	0
LSDLLAPISEQIK	13	1	0	Unmodified	_LSDLLAPISEQIK_			0	0	Q01518;Q5T0R1;Q5T0R2;Q5T0R3;Q5T0R4;Q5T0R5;Q5T0R6;Q5T0R7;Q01518-2;Q5T0R9	Q01518;Q01518-2	Q01518	CAP1	Adenylyl cyclase-associated protein 1;Adenylyl cyclase-associated protein	>sp|Q01518|CAP1_HUMAN Adenylyl cyclase-associated protein 1 OS=Homo sapiens GN=CAP1 PE=1 SV=5;>tr|Q5T0R1|Q5T0R1_HUMAN Adenylyl cyclase-associated protein (Fragment) OS=Homo sapiens GN=CAP1 PE=1 SV=1;>tr|Q5T0R2|Q5T0R2_HUMAN Adenylyl cyclase-associated prote	MULTI-MSMS		JACB153_1	MDA-MB-231 R10K8	718.42	2	713.911	1425.81	41472.1	-0.42321	-0.024579	-0.44779	713.911	717.918	57.527	23.172	0.52583	57.527	57.316	57.842	0		0	0	0	0.00020786	1	19874	94.728	94.728	1	74.622	1.3728	0
ALTGHLEEVVLALLK	15	1	0	Unmodified	_ALTGHLEEVVLALLK_			0	0	P04083;Q5T3N1;Q5T3N0	P04083	P04083	ANXA1	Annexin A1;Annexin	>sp|P04083|ANXA1_HUMAN Annexin A1 OS=Homo sapiens GN=ANXA1 PE=1 SV=2;>tr|Q5T3N1|Q5T3N1_HUMAN Annexin (Fragment) OS=Homo sapiens GN=ANXA1 PE=1 SV=1;>tr|Q5T3N0|Q5T3N0_HUMAN Annexin (Fragment) OS=Homo sapiens GN=ANXA1 PE=1 SV=1	MULTI-MSMS		JACB153_1	MDA-MB-231 R10K8	538.66	3	535.991	1604.95	47871	0.44615	-0.054707	0.39144	536.325	538.662	75.99	29.331	1.0537	75.99	75.551	76.605	0		0	0	0	1.5188e-12	3	26538	212.17	212.17	1	74.677	1.5894	0
DCVGPEVEK	9	1	0	Unmodified	_DCVGPEVEK_			0	0	P00558;B7Z7A9	P00558	P00558	PGK1	Phosphoglycerate kinase 1;Phosphoglycerate kinase	>sp|P00558|PGK1_HUMAN Phosphoglycerate kinase 1 OS=Homo sapiens GN=PGK1 PE=1 SV=3;>tr|B7Z7A9|B7Z7A9_HUMAN Phosphoglycerate kinase OS=Homo sapiens GN=PGK1 PE=1 SV=1	MULTI-MSMS		JACB153_1	MDA-MB-231 R10K8	520.74	2	516.737	1031.46	48307.2	0.18835	-1.2366	-1.0482	516.737	520.744	20.522	10.842	0.68418	20.522	20.309	20.993	0		0	0	0	0.042598	1	5438	56.013	44.794	1	74.68	1.5427	0
EHALLAYTLGVK	12	1	0	Unmodified	_EHALLAYTLGVK_			0	0	Q05639;P68104;Q5VTE0	Q05639;P68104	P68104	EEF1A2;EEF1A1;EEF1A1P5	Elongation factor 1-alpha 2;Elongation factor 1-alpha 1;Putative elongation factor 1-alpha-like 3	>sp|Q05639|EF1A2_HUMAN Elongation factor 1-alpha 2 OS=Homo sapiens GN=EEF1A2 PE=1 SV=1;>sp|P68104|EF1A1_HUMAN Elongation factor 1-alpha 1 OS=Homo sapiens GN=EEF1A1 PE=1 SV=1;>sp|Q5VTE0|EF1A3_HUMAN Putative elongation factor 1-alpha-like 3 OS=Homo sapiens G	MULTI-MSMS		JACB153_1	MDA-MB-231 R10K8	661.88	2	657.874	1313.73	43645.9	-0.35972	-0.45348	-0.8132	657.874	661.881	42.322	18.106	1.039	42.322	42.063	43.102	0		0	0	0	1.0879e-06	2	14099	178.1	178.1	1	74.82	1.1692	0
IIVENLFYPVTLDVLHQIFSK	21	1	0	Unmodified	_IIVENLFYPVTLDVLHQIFSK_			0	0	P26599-3;P26599-2;P26599;K7ES59;K7EKJ7;K7EK45	P26599-3	P26599-3	PTBP1	Polypyrimidine tract-binding protein 1	>sp|P26599-3|PTBP1_HUMAN Isoform 3 of Polypyrimidine tract-binding protein 1 OS=Homo sapiens GN=PTBP1;>sp|P26599-2|PTBP1_HUMAN Isoform 2 of Polypyrimidine tract-binding protein 1 OS=Homo sapiens GN=PTBP1;>sp|P26599|PTBP1_HUMAN Polypyrimidine tract-binding	MULTI-MSMS		JACB153_1	MDA-MB-231 R10K8	833.14	3	830.133	2487.38	38765.5	-0.4449	-0.073867	-0.51877	830.468	833.139	97.942	66.656	1.0461	97.942	97.538	98.584	0		0	0	0	3.5722e-12	1	33992	140.73	140.73	1	75.219	1.9957	0
YDGIILPGK	9	1	0	Unmodified	_YDGIILPGK_			0	0	P62913;P62913-2	P62913	P62913	RPL11	60S ribosomal protein L11	>sp|P62913|RL11_HUMAN 60S ribosomal protein L11 OS=Homo sapiens GN=RPL11 PE=1 SV=2;>sp|P62913-2|RL11_HUMAN Isoform 2 of 60S ribosomal protein L11 OS=Homo sapiens GN=RPL11	MULTI-MSMS		JACB153_1	MDA-MB-231 R10K8	492.29	2	488.279	974.544	50302.1	0.21759	-0.073596	0.144	488.279	492.286	41.44	17.817	0.94463	41.44	41.099	42.044	0		0	0	0	0.003449	1	13746	85.731	75.95	1	75.22	1.3825	0
AALQELLSK	9	1	0	Unmodified	_AALQELLSK_			0	0	P62851	P62851	P62851	RPS25	40S ribosomal protein S25	>sp|P62851|RS25_HUMAN 40S ribosomal protein S25 OS=Homo sapiens GN=RPS25 PE=1 SV=1	MULTI-MSMS		JACB153_1	MDA-MB-231 R10K8	490.8	2	486.79	971.565	50543.6	0.30633	-0.77715	-0.47081	486.79	490.797	42.341	18.115	0.60599	42.341	42.083	42.689	3.8147e-06		0	0	0	0.000788	1	14118	114.5	99.352	1	75.375	1.1906	0
TFVNITPAEVGVLVGK	16	1	0	Unmodified	_TFVNITPAEVGVLVGK_			0	0	P07737;I3L3D5	P07737	P07737	PFN1	Profilin-1	>sp|P07737|PROF1_HUMAN Profilin-1 OS=Homo sapiens GN=PFN1 PE=1 SV=2;>tr|I3L3D5|I3L3D5_HUMAN Profilin-1 (Fragment) OS=Homo sapiens GN=PFN1 PE=1 SV=1	MULTI-MSMS		JACB153_1	MDA-MB-231 R10K8	551.32	3	548.65	1642.93	46828.4	0.37148	-1.1741	-0.80262	548.982	551.322	65.769	25.922	1.4318	65.769	65.449	66.88	0		0	0	0	6.312e-08	2	22930	145.52	143.5	1	75.433	1.3686	0
VTNLLMLK	8	1	0	Unmodified	_VTNLLMLK_			0	0	O95758-4;O95758-5;O95758;O95758-2;O95758-6;O95758-1;X6R242;P26599-3;P26599-2;P26599;K7ES59;K7EKJ7;K7ELW5	O95758-4;P26599-3	P26599-3	PTBP3;PTBP1	Polypyrimidine tract-binding protein 3;Polypyrimidine tract-binding protein 1	>sp|O95758-4|PTBP3_HUMAN Isoform 4 of Polypyrimidine tract-binding protein 3 OS=Homo sapiens GN=PTBP3;>sp|O95758-5|PTBP3_HUMAN Isoform 5 of Polypyrimidine tract-binding protein 3 OS=Homo sapiens GN=PTBP3;>sp|O95758|PTBP3_HUMAN Polypyrimidine tract-binding	MULTI-MSMS		JACB153_1	MDA-MB-231 R10K8	470.29	2	466.286	930.557	49562.6	0.25943	-0.23136	0.028068	466.286	470.293	45.396	19.134	0.36514	45.396	45.192	45.557	-3.8147e-06		0	0	0	0.010565	1	15335	68.625	0	1	75.658	1.3951	0
VIHDNFGIVEGLMTTVHAITATQK	24	1	0	Unmodified	_VIHDNFGIVEGLMTTVHAITATQK_			0	0	P04406;P04406-2;E7EUT5	P04406	P04406	GAPDH	Glyceraldehyde-3-phosphate dehydrogenase	>sp|P04406|G3P_HUMAN Glyceraldehyde-3-phosphate dehydrogenase OS=Homo sapiens GN=GAPDH PE=1 SV=3;>sp|P04406-2|G3P_HUMAN Isoform 2 of Glyceraldehyde-3-phosphate dehydrogenase OS=Homo sapiens GN=GAPDH;>tr|E7EUT5|E7EUT5_HUMAN Glyceraldehyde-3-phosphate dehydr	MULTI-MSMS		JACB153_1	MDA-MB-231 R10K8	651.85	4	649.595	2594.35	43463.5	-0.13402	-0.41929	-0.55331	649.847	651.85	72.197	28.066	1.3154	72.197	71.7	73.016	0		0	0	0	2.7084e-18	3	25293	175.61	175.61	1	75.686	0.87036	0
LDPHLVLDQLR	11	0	1	Unmodified	_LDPHLVLDQLR_			0	0	P35579;P35579-2;P35580-4;P35580-3;F8W6L6;P35580-2;P35580	P35579;P35580-4	P35579	MYH9;MYH10	Myosin-9;Myosin-10	>sp|P35579|MYH9_HUMAN Myosin-9 OS=Homo sapiens GN=MYH9 PE=1 SV=4;>sp|P35579-2|MYH9_HUMAN Isoform 2 of Myosin-9 OS=Homo sapiens GN=MYH9;>sp|P35580-4|MYH10_HUMAN Isoform 4 of Myosin-10 OS=Homo sapiens GN=MYH10;>sp|P35580-3|MYH10_HUMAN Isoform 3 of Myosin-10	MULTI-MSMS		JACB153_1	MDA-MB-231 R10K8	443.93	3	440.254	1317.74	52239.5	-0.080001	0.11955	0.039551	440.254	443.59	51.025	21.008	0.7564	51.025	50.681	51.438	0		0	0	0	0.00072576	2	17431	99.215	99.215	1	75.764	9.8359	0
LLQDSVDFSLADAINTEFK	19	1	0	Unmodified	_LLQDSVDFSLADAINTEFK_			0	0	P08670;B0YJC4	P08670	P08670	VIM	Vimentin	>sp|P08670|VIME_HUMAN Vimentin OS=Homo sapiens GN=VIM PE=1 SV=4;>tr|B0YJC4|B0YJC4_HUMAN Vimentin OS=Homo sapiens GN=VIM PE=1 SV=1	MULTI-MSMS		JACB153_1	MDA-MB-231 R10K8	712.03	3	709.36	2125.06	41539.2	-0.063293	-0.02574	-0.089032	709.695	712.366	77.462	29.822	3.4649	77.462	76.832	80.297	0		0	0	0	2.3597e-13	6	27114	173.37	173.37	1	75.978	1.5236	0
LLIVSNPVDILTYVAWK	17	1	0	Unmodified	_LLIVSNPVDILTYVAWK_			0	0	P00338-3;P00338;P00338-2;P00338-5;F5GXY2	P00338-3	P00338-3	LDHA	L-lactate dehydrogenase A chain	>sp|P00338-3|LDHA_HUMAN Isoform 3 of L-lactate dehydrogenase A chain OS=Homo sapiens GN=LDHA;>sp|P00338|LDHA_HUMAN L-lactate dehydrogenase A chain OS=Homo sapiens GN=LDHA PE=1 SV=2;>sp|P00338-2|LDHA_HUMAN Isoform 2 of L-lactate dehydrogenase A chain OS=Hom	MULTI-MSMS		JACB153_1	MDA-MB-231 R10K8	977.07	2	972.564	1943.11	35983.3	-0.58503	-0.096101	-0.68113	972.565	977.072	91.942	34.648	1.0973	91.942	91.591	92.689	0		0	0	0	3.1774e-10	3	32083	171.67	0	1	76.018	1.164	0
VVDLMAHMASK	11	1	0	Unmodified	_VVDLMAHMASK_			0	0	P04406;P04406-2;E7EUT5	P04406	P04406	GAPDH	Glyceraldehyde-3-phosphate dehydrogenase	>sp|P04406|G3P_HUMAN Glyceraldehyde-3-phosphate dehydrogenase OS=Homo sapiens GN=GAPDH PE=1 SV=3;>sp|P04406-2|G3P_HUMAN Isoform 2 of Glyceraldehyde-3-phosphate dehydrogenase OS=Homo sapiens GN=GAPDH;>tr|E7EUT5|E7EUT5_HUMAN Glyceraldehyde-3-phosphate dehydr	MULTI-MSMS		JACB153_1	MDA-MB-231 R10K8	403.88	3	401.207	1200.6	52073.4	0.083215	-0.84797	-0.76475	401.207	403.879	31.954	14.648	1.1137	31.954	31.706	32.819	0		0	0	0	0.0044248	2	9952	85.288	81.796	1	76.587	0.93757	0
FPGQLNADLR	10	0	1	Unmodified	_FPGQLNADLR_			0	0	Q13509;Q13509-2;G3V2A3;P07437;Q5JP53;Q5ST81;A6NNZ2;I3L2F9;P68371;M0R2D3;Q3ZCM7;Q5SQY0;F5H0I4;Q13885;P04350;Q9BUF5;K7ESM5;Q9BVA1	Q13509;P07437;P68371;Q3ZCM7;Q13885;P04350;Q9BUF5;Q9BVA1	P68371	TUBB3;TUBB;TUBB4B;TUBB8;RP11-631M21.2;TUBB2A;TUBB4A;TUBB6;TUBB2B	Tubulin beta-3 chain;Tubulin beta chain;Tubulin beta-8 chain B;Tubulin beta-4B chain;Tubulin beta-8 chain;Tubulin beta-2A chain;Tubulin beta-4A chain;Tubulin beta-6 chain;Tubulin beta-2B chain	>sp|Q13509|TBB3_HUMAN Tubulin beta-3 chain OS=Homo sapiens GN=TUBB3 PE=1 SV=2;>sp|Q13509-2|TBB3_HUMAN Isoform 2 of Tubulin beta-3 chain OS=Homo sapiens GN=TUBB3;>tr|G3V2A3|G3V2A3_HUMAN Tubulin beta-3 chain (Fragment) OS=Homo sapiens GN=TUBB3 PE=1 SV=1;>sp|	MULTI-MSMS		JACB153_1	MDA-MB-231 R10K8	570.81	2	565.801	1129.59	46699.1	-0.050246	0.1418	0.091554	565.801	570.805	39.704	17.236	1.6431	39.704	38.843	40.486	0		0	0	0	0.00029216	3	13248	145.99	111.46	1	76.631	9.9485	0
EITALAPSTMK	11	1	0	Unmodified	_EITALAPSTMK_			0	0	CON__P60712;P60709;P68032;P68133;P62736;P63267;A6NL76;Q5T8M8;Q5T8M7;P63267-2;P63261	CON__P60712;P68032;P63261	CON__P60712	ACTB;ACTC1;ACTA1;ACTA2;ACTG2;ACTG1	Actin, cytoplasmic 1;Actin, cytoplasmic 1, N-terminally processed;Actin, alpha cardiac muscle 1;Actin, alpha skeletal muscle;Actin, aortic smooth muscle;Actin, gamma-enteric smooth muscle;Actin, cytoplasmic 2;Actin, cytoplasmic 2, N-terminally processed	>P60712 SWISS-PROT:P60712 (Bos taurus) Actin, cytoplasmic 1;>sp|P60709|ACTB_HUMAN Actin, cytoplasmic 1 OS=Homo sapiens GN=ACTB PE=1 SV=1;>sp|P68032|ACTC_HUMAN Actin, alpha cardiac muscle 1 OS=Homo sapiens GN=ACTC1 PE=1 SV=1;>sp|P68133|ACTS_HUMAN Actin, alp	MULTI-MSMS		JACB153_1	MDA-MB-231 R10K8	585.32	2	581.313	1160.61	44908.9	0.32409	0.045219	0.36931	581.313	585.32	35.409	15.806	1.355	35.409	35.207	36.562	0		0	0	0	0.0004449	3	11359	126.19	126.19	1	76.639	0.43335	0
GFCFITFK	8	1	0	Unmodified	_GFCFITFK_			0	0	Q14103;Q14103-2;Q14103-3;B4DTC3;Q14103-4;H0Y8G5;H0YA96;F5H6R6	Q14103	Q14103	HNRNPD	Heterogeneous nuclear ribonucleoprotein D0	>sp|Q14103|HNRPD_HUMAN Heterogeneous nuclear ribonucleoprotein D0 OS=Homo sapiens GN=HNRNPD PE=1 SV=1;>sp|Q14103-2|HNRPD_HUMAN Isoform 2 of Heterogeneous nuclear ribonucleoprotein D0 OS=Homo sapiens GN=HNRNPD;>sp|Q14103-3|HNRPD_HUMAN Isoform 3 of Heterogen	MULTI-MSMS		JACB153_1	MDA-MB-231 R10K8	514.26	2	510.255	1018.49	48471.1	0.11089	0.22277	0.33366	510.255	514.262	57.468	23.152	0.51519	57.468	57.227	57.742	0		0	0	0	0.0026059	2	19845	95.531	95.531	1	76.673	1.7883	0
ETSGNLEQLLLAVVK	15	1	0	Unmodified	_ETSGNLEQLLLAVVK_			0	0	P08758;D6RBL5;D6RBE9	P08758	P08758	ANXA5	Annexin A5;Annexin	>sp|P08758|ANXA5_HUMAN Annexin A5 OS=Homo sapiens GN=ANXA5 PE=1 SV=2;>tr|D6RBL5|D6RBL5_HUMAN Annexin OS=Homo sapiens GN=ANXA5 PE=1 SV=1;>tr|D6RBE9|D6RBE9_HUMAN Annexin OS=Homo sapiens GN=ANXA5 PE=1 SV=1	MULTI-MSMS		JACB153_1	MDA-MB-231 R10K8	541.65	3	538.642	1612.9	47368.9	0.36189	0.065389	0.42728	538.642	541.313	81.05	31.015	0.87302	81.05	80.728	81.601	0		0	0	0	0.0011698	2	28266	85.42	85.42	1	76.686	2.1904	0
VHLVGIDIFTGK	12	1	0	Unmodified	_VHLVGIDIFTGK_			0	0	P63241-2;P63241;I3L504;I3L397;Q6IS14;Q9GZV4;C9J4W5;C9J7B5;F8WCJ1	P63241-2	P63241-2	EIF5A;EIF5AL1;EIF5A2	Eukaryotic translation initiation factor 5A-1;Eukaryotic translation initiation factor 5A-1-like;Eukaryotic translation initiation factor 5A-2	>sp|P63241-2|IF5A1_HUMAN Isoform 2 of Eukaryotic translation initiation factor 5A-1 OS=Homo sapiens GN=EIF5A;>sp|P63241|IF5A1_HUMAN Eukaryotic translation initiation factor 5A-1 OS=Homo sapiens GN=EIF5A PE=1 SV=2;>tr|I3L504|I3L504_HUMAN Eukaryotic translat	MULTI-MSMS		JACB153_1	MDA-MB-231 R10K8	436.26	3	433.587	1297.74	53536.1	0.03046	0.070572	0.10103	433.922	436.258	53.114	21.706	0.64473	53.114	52.839	53.484	3.8147e-06		0	0	0	0.00021277	1	18231	112.83	112.83	1	76.928	1.3987	0
LAALNPESNTAGLDIFAK	18	1	0	Unmodified	_LAALNPESNTAGLDIFAK_			0	0	O00299	O00299	O00299	CLIC1	Chloride intracellular channel protein 1	>sp|O00299|CLIC1_HUMAN Chloride intracellular channel protein 1 OS=Homo sapiens GN=CLIC1 PE=1 SV=4	MULTI-MSMS		JACB153_1	MDA-MB-231 R10K8	927.5	2	922.991	1843.97	36939.7	-0.53781	0.27642	-0.26139	922.993	926.999	60.889	24.297	0.57631	60.889	60.67	61.246	-3.8147e-06		0	0	0	1.6289e-10	1	21084	128.69	118.23	1	77.165	1.1049	0
DAGTIAGLNVLR	12	0	1	Unmodified	_DAGTIAGLNVLR_			0	0	P11142;E9PKE3;P11142-2;E9PN89;E9PLF4;E9PQK7;E9PQQ4;E9PI65;E9PK54	P11142;E9PK54	P11142	HSPA8	Heat shock cognate 71 kDa protein	>sp|P11142|HSP7C_HUMAN Heat shock cognate 71 kDa protein OS=Homo sapiens GN=HSPA8 PE=1 SV=1;>tr|E9PKE3|E9PKE3_HUMAN Heat shock cognate 71 kDa protein OS=Homo sapiens GN=HSPA8 PE=1 SV=1;>sp|P11142-2|HSP7C_HUMAN Isoform 2 of Heat shock cognate 71 kDa protein	MULTI-MSMS		JACB153_1	MDA-MB-231 R10K8	605.35	2	600.341	1198.67	45191.3	-0.35258	0.47416	0.12158	600.842	605.345	53.757	21.918	1.1452	53.757	53.305	54.45	3.8147e-06		0	0	0	0.00013843	1	18491	122.7	115.09	1	77.29	10.034	0
VLDLELK	7	1	0	Unmodified	_VLDLELK_			0	0	P04083	P04083	P04083	ANXA1	Annexin A1	>sp|P04083|ANXA1_HUMAN Annexin A1 OS=Homo sapiens GN=ANXA1 PE=1 SV=2	MULTI-MSMS		JACB153_1	MDA-MB-231 R10K8	419.26	2	415.255	828.496	53280.2	0.21576	-0.50472	-0.28896	415.256	419.262	42.628	18.207	0.85602	42.628	42.399	43.255	0		0	0	0	0.0073673	1	14233	94.662	16.047	1	77.684	1.0868	0
YDDMAAAMK	9	1	0	Unmodified	_YDDMAAAMK_			0	0	P31946;P31946-2;Q4VY19;Q4VY20;P61981	P31946;P61981	P31946	YWHAB;YWHAG	14-3-3 protein beta/alpha;14-3-3 protein beta/alpha, N-terminally processed;14-3-3 protein gamma;14-3-3 protein gamma, N-terminally processed	>sp|P31946|1433B_HUMAN 14-3-3 protein beta/alpha OS=Homo sapiens GN=YWHAB PE=1 SV=3;>sp|P31946-2|1433B_HUMAN Isoform Short of 14-3-3 protein beta/alpha OS=Homo sapiens GN=YWHAB;>tr|Q4VY19|Q4VY19_HUMAN 14-3-3 protein beta/alpha (Fragment) OS=Homo sapiens GN	MULTI-MSMS		JACB153_1	MDA-MB-231 R10K8	512.22	2	508.215	1014.42	48401.2	0.16386	-0.45061	-0.28675	508.215	512.222	27.17	13.055	0.43767	27.17	26.959	27.397	0		0	0	0	0.0010401	1	8060	98.033	88.639	1	77.847	1.817	0
HQGVMVGMGQK	11	1	0	Unmodified	_HQGVMVGMGQK_			0	0	CON__P60712;P60709;E7EVS6;G5E9R0;C9JZR7;C9JUM1;C9JTX5;Q562R1;P68032;P68133;P62736;P63267;A6NL76;Q5T8M8;Q5T8M7;F6QUT6;F6UVQ4;C9JFL5;B8ZZJ2;F8WB63;P63261;I3L1U9;I3L3I0;J3KT65;I3L3R2;K7EM38	CON__P60712;P68032;P63261	CON__P60712	ACTB;ACTBL2;ACTC1;ACTA1;ACTA2;ACTG2;ACTG1	Actin, cytoplasmic 1;Actin, cytoplasmic 1, N-terminally processed;Beta-actin-like protein 2;Actin, alpha cardiac muscle 1;Actin, alpha skeletal muscle;Actin, aortic smooth muscle;Actin, gamma-enteric smooth muscle;Actin, cytoplasmic 2;Actin, cytoplasmic 2, N-terminally processed	>P60712 SWISS-PROT:P60712 (Bos taurus) Actin, cytoplasmic 1;>sp|P60709|ACTB_HUMAN Actin, cytoplasmic 1 OS=Homo sapiens GN=ACTB PE=1 SV=1;>tr|E7EVS6|E7EVS6_HUMAN Actin, cytoplasmic 1 (Fragment) OS=Homo sapiens GN=ACTB PE=1 SV=2;>tr|G5E9R0|G5E9R0_HUMAN Actin	MULTI-MSMS		JACB153_1	MDA-MB-231 R10K8	393.87	3	391.195	1170.56	54803.3	-0.4164	-0.23762	-0.65403	391.196	393.867	17.736	9.9157	1.1889	17.736	17.404	18.593	0		0	0	0	0.00070354	2	4403	101.38	101.38	1	77.947	0.93263	0
LLEAAAQSTK	10	1	0	Unmodified	_LLEAAAQSTK_			0	0	Q15149-4;Q15149;Q15149-2;Q15149-6;Q15149-5;Q15149-9;Q15149-8;Q15149-7;Q15149-3	Q15149-4	Q15149-4	PLEC	Plectin	>sp|Q15149-4|PLEC_HUMAN Isoform 4 of Plectin OS=Homo sapiens GN=PLEC;>sp|Q15149|PLEC_HUMAN Plectin OS=Homo sapiens GN=PLEC PE=1 SV=3;>sp|Q15149-2|PLEC_HUMAN Isoform 2 of Plectin OS=Homo sapiens GN=PLEC;>sp|Q15149-6|PLEC_HUMAN Isoform 6 of Plectin OS=Homo s	MULTI-MSMS		JACB153_1	MDA-MB-231 R10K8	520.3	2	516.29	1030.57	49282.1	0.26673	0.17211	0.43884	516.29	520.297	20.26	10.751	0.52676	20.26	20.015	20.541	0		0	0	0	0.0079581	1	5349	70.942	34.517	1	78.111	2.0285	0
SHTILLVQPTK	11	1	0	Acetyl (Protein N-term)	_(ac)SHTILLVQPTK_			1	0	P84090;G3V279	P84090	P84090	ERH	Enhancer of rudimentary homolog	>sp|P84090|ERH_HUMAN Enhancer of rudimentary homolog OS=Homo sapiens GN=ERH PE=1 SV=1;>tr|G3V279|G3V279_HUMAN Enhancer of rudimentary homolog OS=Homo sapiens GN=ERH PE=1 SV=1	MULTI-MSMS		JACB153_1	MDA-MB-231 R10K8	643.88	2	639.874	1277.73	43810.6	-0.43886	0.39044	-0.048417	639.875	643.882	41.681	17.889	0.42771	41.681	41.458	41.886	0		0	0	0	8.3741e-10	1	13879	213.16	213.16	1	78.51	1.4151	0
QEISAAFK	8	1	0	Unmodified	_QEISAAFK_			0	0	P08758;E9PHT9	P08758	P08758	ANXA5	Annexin A5;Annexin	>sp|P08758|ANXA5_HUMAN Annexin A5 OS=Homo sapiens GN=ANXA5 PE=1 SV=2;>tr|E9PHT9|E9PHT9_HUMAN Annexin OS=Homo sapiens GN=ANXA5 PE=1 SV=1	MULTI-MSMS		JACB153_1	MDA-MB-231 R10K8	451.25	2	447.24	892.465	51569.6	-0.21551	0.50371	0.2882	447.241	451.247	26.409	12.8	0.49327	26.409	26.247	26.74	0		0	0	0	0.0025304	1	7768	99.139	99.139	1	78.641	1.6232	0
ISSPTETER	9	0	1	Unmodified	_ISSPTETER_			0	0	P31949	P31949	P31949	S100A11	Protein S100-A11	>sp|P31949|S10AB_HUMAN Protein S100-A11 OS=Homo sapiens GN=S100A11 PE=1 SV=2	MULTI-MSMS		JACB153_1	MDA-MB-231 R10K8	515.26	2	510.254	1018.49	48573.7	0.25993	-0.16495	0.094983	510.254	515.258	15.569	9.1924	0.52853	15.569	15.381	15.909	9.5367e-07		0	0	0	0.00070192	2	3625	120.12	115.65	1	78.891	10.242	0
NLQEAEEWYK	10	1	0	Unmodified	_NLQEAEEWYK_			0	0	P08670;B0YJC4;B0YJC5;Q5JVS8;P41219-2;P41219;H7C5W5;F8W835	P08670	P08670	VIM;PRPH	Vimentin;Peripherin	>sp|P08670|VIME_HUMAN Vimentin OS=Homo sapiens GN=VIM PE=1 SV=4;>tr|B0YJC4|B0YJC4_HUMAN Vimentin OS=Homo sapiens GN=VIM PE=1 SV=1;>tr|B0YJC5|B0YJC5_HUMAN Vimentin OS=Homo sapiens GN=VIM PE=1 SV=1;>tr|Q5JVS8|Q5JVS8_HUMAN Vimentin (Fragment) OS=Homo sapiens	MULTI-MSMS		JACB153_1	MDA-MB-231 R10K8	659.31	2	655.307	1308.6	43209.7	-0.54768	0.25056	-0.29712	655.307	659.314	39.948	17.318	1.3138	39.948	39.463	40.777	3.8147e-06		0	0	0	0.00061898	4	13111	133.23	133.23	1	78.971	0.93758	0
ILGLLDAYLK	10	1	0	Unmodified	_ILGLLDAYLK_			0	0	P26641;B4DTG2	P26641	P26641	EEF1G	Elongation factor 1-gamma	>sp|P26641|EF1G_HUMAN Elongation factor 1-gamma OS=Homo sapiens GN=EEF1G PE=1 SV=3;>tr|B4DTG2|B4DTG2_HUMAN Elongation factor 1-gamma OS=Homo sapiens GN=EEF1G PE=1 SV=1	MULTI-MSMS		JACB153_1	MDA-MB-231 R10K8	563.85	2	559.845	1117.67	46931	0.1015	0.010617	0.11211	559.845	563.852	69.328	27.109	1.3797	69.328	69.015	70.395	0		0	0	0	0.0027581	3	24199	88.681	67.903	1	78.996	1.1637	0
ALPFWNEEIVPQIK	14	1	0	Unmodified	_ALPFWNEEIVPQIK_			0	0	P18669;Q8N0Y7;P15259	P18669	P18669	PGAM1;PGAM4;PGAM2	Phosphoglycerate mutase 1;Probable phosphoglycerate mutase 4;Phosphoglycerate mutase 2	>sp|P18669|PGAM1_HUMAN Phosphoglycerate mutase 1 OS=Homo sapiens GN=PGAM1 PE=1 SV=2;>sp|Q8N0Y7|PGAM4_HUMAN Probable phosphoglycerate mutase 4 OS=Homo sapiens GN=PGAM4 PE=2 SV=1;>sp|P15259|PGAM2_HUMAN Phosphoglycerate mutase 2 OS=Homo sapiens GN=PGAM2 PE=1	MULTI-MSMS		JACB153_1	MDA-MB-231 R10K8	846.47	2	842.459	1682.9	38331.9	-0.5566	0.19474	-0.36186	842.459	846.466	69.898	27.298	0.68204	69.898	69.602	70.284	7.6294e-06		0	0	0	9.6836e-06	3	24424	138.42	138.42	1	79.306	1.2116	0
DSTLIMQLLR	10	0	1	Unmodified	_DSTLIMQLLR_			0	0	P27348;P31946;P31946-2;P63104;E7EX29;B0AZS6;P63104-2;H0YB80;B7Z2E6;P62258;P62258-2;K7EM20;P61981;Q04917;P31947;P31947-2	P27348;P31946;P63104;P62258;P61981;Q04917;P31947	P27348	YWHAQ;YWHAB;YWHAZ;YWHAE;YWHAG;YWHAH;SFN	14-3-3 protein theta;14-3-3 protein beta/alpha;14-3-3 protein beta/alpha, N-terminally processed;14-3-3 protein zeta/delta;14-3-3 protein epsilon;14-3-3 protein gamma;14-3-3 protein gamma, N-terminally processed;14-3-3 protein eta;14-3-3 protein sigma	>sp|P27348|1433T_HUMAN 14-3-3 protein theta OS=Homo sapiens GN=YWHAQ PE=1 SV=1;>sp|P31946|1433B_HUMAN 14-3-3 protein beta/alpha OS=Homo sapiens GN=YWHAB PE=1 SV=3;>sp|P31946-2|1433B_HUMAN Isoform Short of 14-3-3 protein beta/alpha OS=Homo sapiens GN=YWHAB;	MULTI-MSMS		JACB153_1	MDA-MB-231 R10K8	600.34	2	595.334	1188.65	44911.3	-0.016868	-0.43344	-0.45031	595.333	600.338	72.201	28.067	1.2655	72.201	71.725	72.99	0		0	0	0	0.00087034	4	25224	121.73	99.74	1	79.684	10.345	0
HLEINPDHPIVETLR	15	0	1	Unmodified	_HLEINPDHPIVETLR_			0	0	P08238	P08238	P08238	HSP90AB1	Heat shock protein HSP 90-beta	>sp|P08238|HS90B_HUMAN Heat shock protein HSP 90-beta OS=Homo sapiens GN=HSP90AB1 PE=1 SV=4	MULTI-MSMS		JACB153_1	MDA-MB-231 R10K8	598.32	3	594.988	1781.94	45298.7	-0.59317	-0.16127	-0.75444	595.323	598.324	36.763	16.258	0.6319	36.763	36.503	37.135	-3.8147e-06		0	0	0	5.4752e-09	1	11904	169.25	169.25	1	79.685	10.345	0
DNLAEDIMR	9	0	1	Unmodified	_DNLAEDIMR_			0	0	P08670;B0YJC4	P08670	P08670	VIM	Vimentin	>sp|P08670|VIME_HUMAN Vimentin OS=Homo sapiens GN=VIM PE=1 SV=4;>tr|B0YJC4|B0YJC4_HUMAN Vimentin OS=Homo sapiens GN=VIM PE=1 SV=1	MULTI-MSMS		JACB153_1	MDA-MB-231 R10K8	543.76	2	538.756	1075.5	47280	0.38768	-0.099092	0.28859	538.756	543.76	48.619	20.205	1.3631	48.619	48.237	49.6	-3.8147e-06		0	0	0	0.001061	3	16509	96.665	96.665	1	79.769	10.356	0
VYNYNHLMPTR	11	0	1	Unmodified	_VYNYNHLMPTR_			0	0	P61353;K7ELC7;K7EQQ9	P61353	P61353	RPL27	60S ribosomal protein L27	>sp|P61353|RL27_HUMAN 60S ribosomal protein L27 OS=Homo sapiens GN=RPL27 PE=1 SV=2;>tr|K7ELC7|K7ELC7_HUMAN 60S ribosomal protein L27 (Fragment) OS=Homo sapiens GN=RPL27 PE=1 SV=1;>tr|K7EQQ9|K7EQQ9_HUMAN 60S ribosomal protein L27 OS=Homo sapiens GN=RPL27 PE	MULTI-MSMS		JACB153_1	MDA-MB-231 R10K8	473.24	3	469.899	1406.68	50672.6	0.22762	-0.026972	0.20064	469.9	473.236	30.371	14.121	0.50179	30.371	30.02	30.522	1.9073e-06		0	0	0	0.0007463	1	9373	97.214	97.214	1	79.832	10.364	0
DLVEAVAHILGIR	13	0	1	Unmodified	_DLVEAVAHILGIR_			0	0	P49327	P49327	P49327	FASN	Fatty acid synthase;[Acyl-carrier-protein] S-acetyltransferase;[Acyl-carrier-protein] S-malonyltransferase;3-oxoacyl-[acyl-carrier-protein] synthase;3-oxoacyl-[acyl-carrier-protein] reductase;3-hydroxypalmitoyl-[acyl-carrier-protein] dehydratase;Enoyl-[acyl-carrier-protein] reductase;Oleoyl-[acyl-carrier-protein] hydrolase	>sp|P49327|FAS_HUMAN Fatty acid synthase OS=Homo sapiens GN=FASN PE=1 SV=3	MULTI-MSMS		JACB153_1	MDA-MB-231 R10K8	472.61	3	469.277	1404.81	50882.2	0.43847	-0.17523	0.26324	469.277	472.613	92.222	34.742	0.6875	92.222	91.93	92.618	-7.6294e-06		0	0	0	0.00055927	2	32193	92.925	80.542	1	80.041	10.391	0
YGIICMEDLIHEIYTVGK	18	1	0	Unmodified	_YGIICMEDLIHEIYTVGK_			0	0	P18124;A8MUD9	P18124	P18124	RPL7	60S ribosomal protein L7	>sp|P18124|RL7_HUMAN 60S ribosomal protein L7 OS=Homo sapiens GN=RPL7 PE=1 SV=1;>tr|A8MUD9|A8MUD9_HUMAN 60S ribosomal protein L7 OS=Homo sapiens GN=RPL7 PE=1 SV=1	MULTI-MSMS		JACB153_1	MDA-MB-231 R10K8	721.7	3	718.692	2153.05	41304.8	-0.037964	-0.3328	-0.37077	719.027	721.697	80.391	30.798	0.86832	80.391	80.033	80.901	0		0	0	0	3.4923e-07	2	28131	109.42	109.42	1	80.301	2.2161	0
LQEEMLQR	8	0	1	Unmodified	_LQEEMLQR_			0	0	P08670;B0YJC4;B0YJC5;Q5JVS8	P08670	P08670	VIM	Vimentin	>sp|P08670|VIME_HUMAN Vimentin OS=Homo sapiens GN=VIM PE=1 SV=4;>tr|B0YJC4|B0YJC4_HUMAN Vimentin OS=Homo sapiens GN=VIM PE=1 SV=1;>tr|B0YJC5|B0YJC5_HUMAN Vimentin OS=Homo sapiens GN=VIM PE=1 SV=1;>tr|Q5JVS8|Q5JVS8_HUMAN Vimentin (Fragment) OS=Homo sapiens	MULTI-MSMS		JACB153_1	MDA-MB-231 R10K8	528.77	2	523.769	1045.52	46799.4	0.10461	-1.2356	-1.131	523.768	528.772	26.204	12.736	0.58674	26.204	25.976	26.563	0		0	0	0	0.00017246	1	7674	163.99	92.484	1	80.62	10.466	0
TLTLVDTGIGMTK	13	1	0	Unmodified	_TLTLVDTGIGMTK_			0	0	P08238;Q58FF8	P08238	P08238	HSP90AB1;HSP90AB2P	Heat shock protein HSP 90-beta;Putative heat shock protein HSP 90-beta 2	>sp|P08238|HS90B_HUMAN Heat shock protein HSP 90-beta OS=Homo sapiens GN=HSP90AB1 PE=1 SV=4;>sp|Q58FF8|H90B2_HUMAN Putative heat shock protein HSP 90-beta 2 OS=Homo sapiens GN=HSP90AB2P PE=1 SV=2	MULTI-MSMS		JACB153_1	MDA-MB-231 R10K8	679.38	2	675.371	1348.73	42918.4	-0.61339	0.21029	-0.4031	675.371	679.378	50.883	20.959	0.93887	50.883	50.394	51.332	3.8147e-06		0	0	0	1.1823e-06	2	17386	168.59	0	1	80.715	1.0074	0
SIQCLTVHK	9	1	0	Unmodified	_SIQCLTVHK_			0	0	O75083;O75083-3	O75083	O75083	WDR1	WD repeat-containing protein 1	>sp|O75083|WDR1_HUMAN WD repeat-containing protein 1 OS=Homo sapiens GN=WDR1 PE=1 SV=4;>sp|O75083-3|WDR1_HUMAN Isoform 2 of WD repeat-containing protein 1 OS=Homo sapiens GN=WDR1	MULTI-MSMS		JACB153_1	MDA-MB-231 R10K8	365.2	3	362.531	1084.57	55816.1	0.44182	-0.16403	0.27778	362.862	365.202	19.076	10.359	0.5449	19.076	18.813	19.357	-1.9073e-06		0	0	0	0.0087539	1	4913	67.334	67.334	1	80.866	2.8925	0
MAVTFIGNSTAIQELFK	17	1	0	Unmodified	_MAVTFIGNSTAIQELFK_			0	0	P07437;Q5JP53;Q5ST81;E9PBJ4	P07437	P07437	TUBB	Tubulin beta chain	>sp|P07437|TBB5_HUMAN Tubulin beta chain OS=Homo sapiens GN=TUBB PE=1 SV=2;>tr|Q5JP53|Q5JP53_HUMAN Tubulin beta chain OS=Homo sapiens GN=TUBB PE=1 SV=1;>tr|Q5ST81|Q5ST81_HUMAN Tubulin beta chain OS=Homo sapiens GN=TUBB PE=1 SV=1;>tr|E9PBJ4|E9PBJ4_HUMAN Tub	MULTI-MSMS		JACB153_1	MDA-MB-231 R10K8	940	2	935.493	1868.97	35708.4	-0.5257	-0.39177	-0.91748	935.993	939.5	74.936	28.978	0.91596	74.936	74.661	75.577	0		0	0	0	4.7359e-10	1	26116	163.71	163.71	1	80.897	1.4827	0
LEGLTDEINFLR	12	0	1	Unmodified	_LEGLTDEINFLR_			0	0	P05787-2;CON__P05787;P05787;F8VUG2;CON__H-INV:HIT000292931;F8W1U3;CON__Q9H552;F8VP67;H0YIB2	P05787-2	P05787-2	KRT8	Keratin, type II cytoskeletal 8	>sp|P05787-2|K2C8_HUMAN Isoform 2 of Keratin, type II cytoskeletal 8 OS=Homo sapiens GN=KRT8;>P05787 SWISS-PROT:P05787 Tax_Id=9606 Gene_Symbol=KRT8 Keratin, type II cytoskeletal 8;>sp|P05787|K2C8_HUMAN Keratin, type II cytoskeletal 8 OS=Homo sapiens GN=KRT	MULTI-MSMS		JACB153_1	MDA-MB-231 R10K8	715.38	2	710.378	1418.74	41363.5	0.14096	-0.28418	-0.14322	710.376	715.382	63.748	25.252	0.54301	63.748	63.496	64.039	0		0	0	0	0.00019783	1	22111	114.82	79.08	1	80.959	10.51	0
LGDVYVNDAFGTAHR	15	0	1	Unmodified	_LGDVYVNDAFGTAHR_			0	0	P00558;B7Z7A9;P07205	P00558	P00558	PGK1;PGK2	Phosphoglycerate kinase 1;Phosphoglycerate kinase;Phosphoglycerate kinase 2	>sp|P00558|PGK1_HUMAN Phosphoglycerate kinase 1 OS=Homo sapiens GN=PGK1 PE=1 SV=3;>tr|B7Z7A9|B7Z7A9_HUMAN Phosphoglycerate kinase OS=Homo sapiens GN=PGK1 PE=1 SV=1;>sp|P07205|PGK2_HUMAN Phosphoglycerate kinase 2 OS=Homo sapiens GN=PGK2 PE=1 SV=3	MULTI-MSMS		JACB153_1	MDA-MB-231 R10K8	548.94	3	545.602	1633.78	47062	-0.081826	-0.74843	-0.83026	545.602	548.938	39.336	17.114	1.0583	39.336	38.843	39.901	0		0	0	0	5.0921e-09	2	12935	170.56	170.56	1	81.238	10.547	0
VFIMDSCDELIPEYLNFIR	19	0	1	Unmodified	_VFIMDSCDELIPEYLNFIR_			0	0	P08238	P08238	P08238	HSP90AB1	Heat shock protein HSP 90-beta	>sp|P08238|HS90B_HUMAN Heat shock protein HSP 90-beta OS=Homo sapiens GN=HSP90AB1 PE=1 SV=4	MULTI-MSMS		JACB153_1	MDA-MB-231 R10K8	795.72	3	792.053	2373.14	39301	-0.48664	-0.20963	-0.69627	792.388	795.724	89.013	33.669	1.213	89.013	88.712	89.924	0		0	0	0	4.802e-11	3	31120	142.91	142.91	1	81.264	10.55	0
EIIDLVLDR	9	0	1	Unmodified	_EIIDLVLDR_			0	0	Q71U36;Q71U36-2;F8VQQ4;F8VS66;F8VRZ4;F5H5D3;Q9BQE3;F8VVB9;P68363;CON__ENSEMBL:ENSBTAP00000016242	Q71U36;F5H5D3;P68363	P68363	TUBA1A;TUBA1C;TUBA1B	Tubulin alpha-1A chain;Tubulin alpha-1C chain;Tubulin alpha-1B chain	>sp|Q71U36|TBA1A_HUMAN Tubulin alpha-1A chain OS=Homo sapiens GN=TUBA1A PE=1 SV=1;>sp|Q71U36-2|TBA1A_HUMAN Isoform 2 of Tubulin alpha-1A chain OS=Homo sapiens GN=TUBA1A;>tr|F8VQQ4|F8VQQ4_HUMAN Tubulin alpha-1A chain (Fragment) OS=Homo sapiens GN=TUBA1A PE=	MULTI-MSMS		JACB153_1	MDA-MB-231 R10K8	548.32	2	543.314	1084.61	46890.5	0.44785	0.12958	0.57743	543.314	548.318	60.828	24.272	1.0818	60.828	60.515	61.597	-3.8147e-06		0	0	0	0.00033945	3	21176	139.98	139.98	1	81.367	10.563	0
GLGTDEESILTLLTSR	16	0	1	Unmodified	_GLGTDEESILTLLTSR_			0	0	P08758;E9PHT9	P08758	P08758	ANXA5	Annexin A5;Annexin	>sp|P08758|ANXA5_HUMAN Annexin A5 OS=Homo sapiens GN=ANXA5 PE=1 SV=2;>tr|E9PHT9|E9PHT9_HUMAN Annexin OS=Homo sapiens GN=ANXA5 PE=1 SV=1	MULTI-MSMS		JACB153_1	MDA-MB-231 R10K8	572.31	3	568.972	1703.89	47112.3	0.27888	-0.15126	0.12761	568.972	572.308	77.921	29.976	0.89875	77.921	77.571	78.469	0		0	0	0	3.3582e-12	3	27253	189.09	189.09	1	81.418	10.57	0
IIAPPER	7	0	1	Unmodified	_IIAPPER_			0	0	CON__P60712;P60709;Q562R1;P68032;P68133;P62736;P63267;A6NL76;Q5T8M8;Q5T8M7;P63267-2;P63261	CON__P60712;P68032;P63261	CON__P60712	ACTB;ACTBL2;ACTC1;ACTA1;ACTA2;ACTG2;ACTG1	Actin, cytoplasmic 1;Actin, cytoplasmic 1, N-terminally processed;Beta-actin-like protein 2;Actin, alpha cardiac muscle 1;Actin, alpha skeletal muscle;Actin, aortic smooth muscle;Actin, gamma-enteric smooth muscle;Actin, cytoplasmic 2;Actin, cytoplasmic 2, N-terminally processed	>P60712 SWISS-PROT:P60712 (Bos taurus) Actin, cytoplasmic 1;>sp|P60709|ACTB_HUMAN Actin, cytoplasmic 1 OS=Homo sapiens GN=ACTB PE=1 SV=1;>sp|Q562R1|ACTBL_HUMAN Beta-actin-like protein 2 OS=Homo sapiens GN=ACTBL2 PE=1 SV=2;>sp|P68032|ACTC_HUMAN Actin, alpha	MULTI-MSMS		JACB153_1	MDA-MB-231 R10K8	403.24	2	398.24	794.465	54186.3	-0.09078	0.0319	-0.05888	398.24	403.244	21.932	11.314	1.1298	21.932	21.703	22.833	-1.9073e-06		0	0	0	0.0085079	3	6098	91.065	33.506	1	81.555	10.588	0
TFCQLILDPIFK	12	1	0	Unmodified	_TFCQLILDPIFK_			0	0	P13639	P13639	P13639	EEF2	Elongation factor 2	>sp|P13639|EF2_HUMAN Elongation factor 2 OS=Homo sapiens GN=EEF2 PE=1 SV=4	MULTI-MSMS		JACB153_1	MDA-MB-231 R10K8	751.91	2	747.905	1493.8	40105.2	-0.20627	-0.045197	-0.25147	748.407	751.912	72.972	28.323	1.4746	72.972	72.674	74.149	0		0	0	0	0.00016732	2	25393	118.87	118.87	1	81.702	1.5203	0
YHTSQSGDEMTSLSEYVSR	19	0	1	Unmodified	_YHTSQSGDEMTSLSEYVSR_			0	0	P08238	P08238	P08238	HSP90AB1	Heat shock protein HSP 90-beta	>sp|P08238|HS90B_HUMAN Heat shock protein HSP 90-beta OS=Homo sapiens GN=HSP90AB1 PE=1 SV=4	MULTI-MSMS		JACB153_1	MDA-MB-231 R10K8	729.99	3	726.32	2175.94	41121.5	-0.20186	-0.44425	-0.64611	726.654	729.99	40.462	17.491	0.68811	40.462	40.171	40.859	0		0	0	0	1.8552e-07	1	13358	115.57	115.57	1	81.9	10.632	0
IVSQLLTLMDGLK	13	1	0	Unmodified	_IVSQLLTLMDGLK_			0	0	P55072	P55072	P55072	VCP	Transitional endoplasmic reticulum ATPase	>sp|P55072|TERA_HUMAN Transitional endoplasmic reticulum ATPase OS=Homo sapiens GN=VCP PE=1 SV=4	MULTI-MSMS		JACB153_1	MDA-MB-231 R10K8	719.93	2	715.918	1429.82	41537.7	0.10422	-0.53411	-0.42989	715.918	719.925	74.005	28.672	0.93823	74.005	73.674	74.612	0		0	0	0	0.0033395	1	25775	85.42	85.42	1	82.003	2.0807	0
NVTLPAVFK	9	1	0	Unmodified	_NVTLPAVFK_			0	0	P36578;H3BU31;H3BTP7	P36578	P36578	RPL4	60S ribosomal protein L4	>sp|P36578|RL4_HUMAN 60S ribosomal protein L4 OS=Homo sapiens GN=RPL4 PE=1 SV=5;>tr|H3BU31|H3BU31_HUMAN 60S ribosomal protein L4 (Fragment) OS=Homo sapiens GN=RPL4 PE=1 SV=1;>tr|H3BTP7|H3BTP7_HUMAN 60S ribosomal protein L4 (Fragment) OS=Homo sapiens GN=RPL	MULTI-MSMS		JACB153_1	MDA-MB-231 R10K8	498.8	2	494.795	987.575	49425.7	0.2265	0.31976	0.54626	494.794	498.802	48.538	20.18	0.90137	48.538	48.159	49.06	0		0	0	0	0.047335	1	16539	55.064	49.844	1	82.379	1.7769	0
MSVQPTVSLGGFEITPPVVLR	21	0	1	Unmodified	_MSVQPTVSLGGFEITPPVVLR_			0	0	P06748;P06748-2;P06748-3;E5RI98	P06748	P06748	NPM1	Nucleophosmin	>sp|P06748|NPM_HUMAN Nucleophosmin OS=Homo sapiens GN=NPM1 PE=1 SV=2;>sp|P06748-2|NPM_HUMAN Isoform 2 of Nucleophosmin OS=Homo sapiens GN=NPM1;>sp|P06748-3|NPM_HUMAN Isoform 3 of Nucleophosmin OS=Homo sapiens GN=NPM1;>tr|E5RI98|E5RI98_HUMAN Nucleophosmin (	MULTI-MSMS		JACB153_1	MDA-MB-231 R10K8	1119.62	2	1114.11	2226.21	33055.6	-0.38605	-0.27121	-0.65726	1114.61	1119.62	76.22	29.406	0.81166	76.22	75.822	76.634	-7.6294e-06		0	0	0	5.209e-18	2	26658	162.85	162.85	1	82.384	10.695	0
LTDCVVMR	8	0	1	Unmodified	_LTDCVVMR_			0	0	P22626;P22626-2	P22626	P22626	HNRNPA2B1	Heterogeneous nuclear ribonucleoproteins A2/B1	>sp|P22626|ROA2_HUMAN Heterogeneous nuclear ribonucleoproteins A2/B1 OS=Homo sapiens GN=HNRNPA2B1 PE=1 SV=2;>sp|P22626-2|ROA2_HUMAN Isoform A2 of Heterogeneous nuclear ribonucleoproteins A2/B1 OS=Homo sapiens GN=HNRNPA2B1	MULTI-MSMS		JACB153_1	MDA-MB-231 R10K8	502.25	2	497.246	992.478	48936.4	-0.39265	-0.35017	-0.74282	497.248	502.251	27.791	13.264	0.62769	27.791	27.397	28.024	0		0	0	0	0.0023793	1	8328	106.36	74.001	1	82.901	10.762	0
ELLPVLISAMK	11	1	0	Unmodified	_ELLPVLISAMK_			0	0	P18206;P18206-2;P18206-3	P18206	P18206	VCL	Vinculin	>sp|P18206|VINC_HUMAN Vinculin OS=Homo sapiens GN=VCL PE=1 SV=4;>sp|P18206-2|VINC_HUMAN Isoform 1 of Vinculin OS=Homo sapiens GN=VCL;>sp|P18206-3|VINC_HUMAN Isoform 3 of Vinculin OS=Homo sapiens GN=VCL	MULTI-MSMS		JACB153_1	MDA-MB-231 R10K8	611.37	2	607.365	1212.72	44816.9	-0.19951	-0.23066	-0.43017	607.366	611.372	67.802	26.6	0.56093	67.802	67.532	68.093	7.6294e-06		0	0	0	0.0060244	1	23590	81.525	81.525	1	82.918	2.7145	0
YLTVAAVFR	9	0	1	Unmodified	_YLTVAAVFR_			0	0	P07437;Q5JP53;Q5ST81;P68371;P04350	P07437;P68371;P04350	P68371	TUBB;TUBB4B;TUBB4A	Tubulin beta chain;Tubulin beta-4B chain;Tubulin beta-4A chain	>sp|P07437|TBB5_HUMAN Tubulin beta chain OS=Homo sapiens GN=TUBB PE=1 SV=2;>tr|Q5JP53|Q5JP53_HUMAN Tubulin beta chain OS=Homo sapiens GN=TUBB PE=1 SV=1;>tr|Q5ST81|Q5ST81_HUMAN Tubulin beta chain OS=Homo sapiens GN=TUBB PE=1 SV=1;>sp|P68371|TBB4B_HUMAN Tubu	MULTI-MSMS		JACB153_1	MDA-MB-231 R10K8	525.3	2	520.3	1038.59	47924.8	0.43262	-0.033891	0.39873	520.3	525.305	52.142	21.377	1.3193	52.142	51.811	53.13	0		0	0	0	0.00092138	3	17853	105.78	80.966	1	82.997	10.775	0
TTPSYVAFTDTER	13	0	1	Unmodified	_TTPSYVAFTDTER_			0	0	P11142;E9PKE3;P11142-2;E9PNE6;E9PLF4;E9PQK7;E9PQQ4;E9PPY6;E9PI65;E9PN25;P54652;P17066;P48741;E9PK54;P08107;P08107-2	P11142;P54652;P17066;E9PK54;P08107	P11142	HSPA8;HSPA2;HSPA6;HSPA7;HSPA1A	Heat shock cognate 71 kDa protein;Heat shock-related 70 kDa protein 2;Heat shock 70 kDa protein 6;Putative heat shock 70 kDa protein 7;Heat shock 70 kDa protein 1A/1B	>sp|P11142|HSP7C_HUMAN Heat shock cognate 71 kDa protein OS=Homo sapiens GN=HSPA8 PE=1 SV=1;>tr|E9PKE3|E9PKE3_HUMAN Heat shock cognate 71 kDa protein OS=Homo sapiens GN=HSPA8 PE=1 SV=1;>sp|P11142-2|HSP7C_HUMAN Isoform 2 of Heat shock cognate 71 kDa protein	MULTI-MSMS		JACB153_1	MDA-MB-231 R10K8	749.36	2	744.354	1486.69	40519.6	-0.66434	0.036767	-0.62757	744.855	749.358	39.83	17.276	0.84172	39.83	39.506	40.348	0		0	0	0	0.00013066	2	13232	111.31	111.31	1	83.167	10.797	0
CYEMASHLR	9	0	1	Unmodified	_CYEMASHLR_			0	0	P07737;K7EJ44;CON__P02584	P07737	P07737	PFN1	Profilin-1	>sp|P07737|PROF1_HUMAN Profilin-1 OS=Homo sapiens GN=PFN1 PE=1 SV=2;>tr|K7EJ44|K7EJ44_HUMAN Profilin 1, isoform CRA_b OS=Homo sapiens GN=PFN1 PE=1 SV=1;>P02584 SWISS-PROT:P02584 (Bos taurus) Profilin-1	MULTI-MSMS		JACB153_1	MDA-MB-231 R10K8	392.84	3	389.508	1165.5	54595.5	-0.3437	-0.51519	-0.85889	389.508	392.844	20.737	10.91	0.90627	20.737	20.485	21.391	0		0	0	0	0.0010401	2	5499	98.033	89.546	1	83.232	10.805	0
LLLQVQHASK	10	1	0	Unmodified	_LLLQVQHASK_			0	0	P05141;P12236;I7HJJ0;P12235;V9GYG0	P05141;P12236;P12235	P12236	SLC25A5;SLC25A6;SLC25A4	ADP/ATP translocase 2;ADP/ATP translocase 3;ADP/ATP translocase 1	>sp|P05141|ADT2_HUMAN ADP/ATP translocase 2 OS=Homo sapiens GN=SLC25A5 PE=1 SV=7;>sp|P12236|ADT3_HUMAN ADP/ATP translocase 3 OS=Homo sapiens GN=SLC25A6 PE=1 SV=4;>tr|I7HJJ0|I7HJJ0_HUMAN ADP/ATP translocase 3 (Fragment) OS=Homo sapiens GN=SLC25A6 PE=1 SV=1;	MULTI-MSMS		JACB153_1	MDA-MB-231 R10K8	382.24	3	379.564	1135.67	56553.2	-0.16027	-0.37678	-0.53705	379.564	382.236	23.403	11.8	0.64513	23.403	23.213	23.859	0		0	0	0	0.0010115	1	6558	111.06	108.11	1	83.378	1.4315	0
AYTNFDAER	9	0	1	Unmodified	_AYTNFDAER_			0	0	P07355-2;P07355;H0YN42;A6NMY6;H0YMU9;H0YMD0;H0YKS4;H0YMM1;H0YMW4;H0YKX9;H0YMT9;H0YLV6;H0YKZ7;H0YKL9;H0YKV8;H0YMD9;H0YKN4;H0YNB8	P07355-2	P07355-2	ANXA2;ANXA2P2	Annexin A2;Annexin;Putative annexin A2-like protein	>sp|P07355-2|ANXA2_HUMAN Isoform 2 of Annexin A2 OS=Homo sapiens GN=ANXA2;>sp|P07355|ANXA2_HUMAN Annexin A2 OS=Homo sapiens GN=ANXA2 PE=1 SV=2;>tr|H0YN42|H0YN42_HUMAN Annexin (Fragment) OS=Homo sapiens GN=ANXA2 PE=1 SV=1;>sp|A6NMY6|AXA2L_HUMAN Putative ann	MULTI-MSMS		JACB153_1	MDA-MB-231 R10K8	548.75	2	543.746	1085.48	47463.1	-0.086619	0.067988	-0.018631	543.746	548.75	25.38	12.46	0.81202	25.38	25.047	25.859	0		0	0	0	0.00024716	1	7354	144.77	144.77	1	83.623	10.856	0
LAMQEFMILPVGAANFR	17	0	1	Unmodified	_LAMQEFMILPVGAANFR_			0	0	P06733;P06733-2;K7EM90	P06733	P06733	ENO1	Alpha-enolase	>sp|P06733|ENOA_HUMAN Alpha-enolase OS=Homo sapiens GN=ENO1 PE=1 SV=2;>sp|P06733-2|ENOA_HUMAN Isoform MBP-1 of Alpha-enolase OS=Homo sapiens GN=ENO1;>tr|K7EM90|K7EM90_HUMAN Enolase (Fragment) OS=Homo sapiens GN=ENO1 PE=1 SV=1	MULTI-MSMS		JACB153_1	MDA-MB-231 R10K8	960	2	954.497	1906.98	35840.9	-0.6393	-0.16649	-0.80579	954.999	960.003	78.071	30.024	0.90944	78.071	77.667	78.576	0		0	0	0	4.4729e-08	2	27208	124.92	124.92	1	83.749	10.873	0
ISEQFTAMFR	10	0	1	Unmodified	_ISEQFTAMFR_			0	0	Q13509;Q13509-2;P07437;Q5JP53;Q5ST81;E9PBJ4;P68371;Q13885;P04350;Q9BVA1	Q13509;P07437;P68371;Q13885;P04350;Q9BVA1	P68371	TUBB3;TUBB;TUBB4B;TUBB2A;TUBB4A;TUBB2B	Tubulin beta-3 chain;Tubulin beta chain;Tubulin beta-4B chain;Tubulin beta-2A chain;Tubulin beta-4A chain;Tubulin beta-2B chain	>sp|Q13509|TBB3_HUMAN Tubulin beta-3 chain OS=Homo sapiens GN=TUBB3 PE=1 SV=2;>sp|Q13509-2|TBB3_HUMAN Isoform 2 of Tubulin beta-3 chain OS=Homo sapiens GN=TUBB3;>sp|P07437|TBB5_HUMAN Tubulin beta chain OS=Homo sapiens GN=TUBB PE=1 SV=2;>tr|Q5JP53|Q5JP53_HU	MULTI-MSMS		JACB153_1	MDA-MB-231 R10K8	620.31	2	615.303	1228.59	43891.3	-0.27997	-0.30696	-0.58693	615.302	620.307	51.426	21.141	1.2665	51.426	51.133	52.399	0		0	0	0	1.3171e-05	4	17597	168.79	123.93	1	83.79	10.878	0
LASDLLEWIR	10	0	1	Unmodified	_LASDLLEWIR_			0	0	O43707;O43707-2;K7EJH8;P12814;P12814-3;P12814-4;P12814-2;H9KV75;G3V2W4	O43707;P12814	O43707	ACTN4;ACTN1	Alpha-actinin-4;Alpha-actinin-1	>sp|O43707|ACTN4_HUMAN Alpha-actinin-4 OS=Homo sapiens GN=ACTN4 PE=1 SV=2;>sp|O43707-2|ACTN4_HUMAN Isoform ACTN4ISO of Alpha-actinin-4 OS=Homo sapiens GN=ACTN4;>tr|K7EJH8|K7EJH8_HUMAN Alpha-actinin-4 (Fragment) OS=Homo sapiens GN=ACTN4 PE=1 SV=1;>sp|P12814	MULTI-MSMS		JACB153_1	MDA-MB-231 R10K8	613.34	2	608.34	1214.67	44825.5	-0.32024	0.08876	-0.23149	608.34	613.344	69.324	27.109	0.78549	69.324	68.999	69.784	0		0	0	0	0.00039602	3	24212	141.93	141.93	1	83.94	10.897	0
DLADELALVDVIEDK	15	1	0	Unmodified	_DLADELALVDVIEDK_			0	0	P00338-3;P00338;P00338-4;P00338-2;P00338-5;F5GXY2;F5GYU2;F5GXH2;F5H6W8;F5H5J4;F5GZQ4	P00338-3	P00338-3	LDHA	L-lactate dehydrogenase A chain	>sp|P00338-3|LDHA_HUMAN Isoform 3 of L-lactate dehydrogenase A chain OS=Homo sapiens GN=LDHA;>sp|P00338|LDHA_HUMAN L-lactate dehydrogenase A chain OS=Homo sapiens GN=LDHA PE=1 SV=2;>sp|P00338-4|LDHA_HUMAN Isoform 4 of L-lactate dehydrogenase A chain OS=Hom	MULTI-MSMS		JACB153_1	MDA-MB-231 R10K8	555.96	3	553.289	1656.85	46891.1	0.33479	-0.085239	0.24955	553.289	555.961	84.535	32.179	1.3156	84.535	84.24	85.556	0		0	0	0	1.4222e-05	3	29589	108.89	108.89	1	84.03	1.5632	0
ECLPLIIFLR	10	0	1	Unmodified	_ECLPLIIFLR_			0	0	P62701;A6NH36	P62701	P62701	RPS4X	40S ribosomal protein S4, X isoform	>sp|P62701|RS4X_HUMAN 40S ribosomal protein S4, X isoform OS=Homo sapiens GN=RPS4X PE=1 SV=2;>tr|A6NH36|A6NH36_HUMAN 40S ribosomal protein S4, X isoform OS=Homo sapiens GN=RPS4X PE=1 SV=1	MULTI-MSMS		JACB153_1	MDA-MB-231 R10K8	642.37	2	637.37	1272.73	44135.7	-0.31036	-0.26616	-0.57652	637.371	642.375	78.06	30.019	0.70659	78.06	77.686	78.393	0		0	0	0	0.0044967	2	27306	82.749	82.749	1	84.197	10.931	0
STTTGHLIYK	10	1	0	Unmodified	_STTTGHLIYK_			0	0	Q05639;P68104;Q5VTE0;Q5JR01;A6PW80	Q05639;P68104	P68104	EEF1A2;EEF1A1;EEF1A1P5	Elongation factor 1-alpha 2;Elongation factor 1-alpha 1;Putative elongation factor 1-alpha-like 3	>sp|Q05639|EF1A2_HUMAN Elongation factor 1-alpha 2 OS=Homo sapiens GN=EEF1A2 PE=1 SV=1;>sp|P68104|EF1A1_HUMAN Elongation factor 1-alpha 1 OS=Homo sapiens GN=EEF1A1 PE=1 SV=1;>sp|Q5VTE0|EF1A3_HUMAN Putative elongation factor 1-alpha-like 3 OS=Homo sapiens G	MULTI-MSMS		JACB153_1	MDA-MB-231 R10K8	564.81	2	560.803	1119.59	46837	-0.43565	0.56886	0.13321	560.804	564.811	17.395	9.7969	0.86092	17.395	17.176	18.037	0		0	0	0	0.00039441	3	4282	142	109.99	1	84.277	0.97576	0
VLTPTQVK	8	1	0	Unmodified	_VLTPTQVK_			0	0	P30086	P30086	P30086	PEBP1	Phosphatidylethanolamine-binding protein 1;Hippocampal cholinergic neurostimulating peptide	>sp|P30086|PEBP1_HUMAN Phosphatidylethanolamine-binding protein 1 OS=Homo sapiens GN=PEBP1 PE=1 SV=3	MULTI-MSMS		JACB153_1	MDA-MB-231 R10K8	447.28	2	443.274	884.533	52251.4	-0.11617	0.18485	0.068679	443.274	447.281	21.644	11.211	0.48975	21.644	21.482	21.972	1.9073e-06		0	0	0	0.0015166	1	5894	133.55	55.874	1	84.577	1.927	0
FDGALNVDLTEFQTNLVPYPR	21	0	1	Unmodified	_FDGALNVDLTEFQTNLVPYPR_			0	0	Q71U36;Q71U36-2;Q13748;Q6PEY2;Q13748-2;V9GZ17;F5H5D3;Q9BQE3;F8VVB9;P68366;A8MUB1;C9JDS9;P68363;CON__ENSEMBL:ENSBTAP00000016242	Q71U36;F5H5D3;P68366;P68363	P68363	TUBA1A;TUBA3C;TUBA3E;TUBA1C;TUBA1B;TUBA4A	Tubulin alpha-1A chain;Tubulin alpha-3C/D chain;Tubulin alpha-3E chain;Tubulin alpha-1C chain;Tubulin alpha-4A chain;Tubulin alpha-1B chain	>sp|Q71U36|TBA1A_HUMAN Tubulin alpha-1A chain OS=Homo sapiens GN=TUBA1A PE=1 SV=1;>sp|Q71U36-2|TBA1A_HUMAN Isoform 2 of Tubulin alpha-1A chain OS=Homo sapiens GN=TUBA1A;>sp|Q13748|TBA3C_HUMAN Tubulin alpha-3C/D chain OS=Homo sapiens GN=TUBA3C PE=1 SV=3;>sp	MULTI-MSMS		JACB153_1	MDA-MB-231 R10K8	1210.61	2	1205.11	2408.2	32085.8	-0.37175	0.19469	-0.17705	1205.61	1210.61	78.192	30.064	1.1583	78.192	77.94	79.098	-7.6294e-06		0	0	0	1.7116e-33	3	27268	279.58	279.58	1	84.651	10.99	0
LHFFMPGFAPLTSR	14	0	1	Unmodified	_LHFFMPGFAPLTSR_			0	0	P07437;Q5JP53;Q5ST81;A6NNZ2;I3L2F9;P68371;Q3ZCM7;Q5SQY0;F5H0I4;Q13885;P04350;Q9BUF5;K7ESM5;Q9BVA1	P07437;P68371;Q3ZCM7;Q13885;P04350;Q9BUF5;Q9BVA1	P68371	TUBB;TUBB4B;TUBB8;RP11-631M21.2;TUBB2A;TUBB4A;TUBB6;TUBB2B	Tubulin beta chain;Tubulin beta-8 chain B;Tubulin beta-4B chain;Tubulin beta-8 chain;Tubulin beta-2A chain;Tubulin beta-4A chain;Tubulin beta-6 chain;Tubulin beta-2B chain	>sp|P07437|TBB5_HUMAN Tubulin beta chain OS=Homo sapiens GN=TUBB PE=1 SV=2;>tr|Q5JP53|Q5JP53_HUMAN Tubulin beta chain OS=Homo sapiens GN=TUBB PE=1 SV=1;>tr|Q5ST81|Q5ST81_HUMAN Tubulin beta chain OS=Homo sapiens GN=TUBB PE=1 SV=1;>sp|A6NNZ2|TBB8L_HUMAN Tubu	MULTI-MSMS		JACB153_1	MDA-MB-231 R10K8	544.29	3	540.95	1619.83	47681.3	0.24572	-0.10512	0.1406	540.951	544.286	61.801	24.6	1.1988	61.801	61.491	62.69	0		0	0	0	1.3386e-05	4	21380	131.13	111.39	1	84.708	10.997	0
AVFVDLEPTVIDEVR	15	0	1	Unmodified	_AVFVDLEPTVIDEVR_			0	0	Q71U36;Q71U36-2;F8VQQ4;F8VS66;F8VRZ4;F8VWV9;F8VX09;F8VRK0;F5H5D3;Q9BQE3;F8VVB9;P68363;CON__ENSEMBL:ENSBTAP00000016242	Q71U36;F5H5D3;P68363	P68363	TUBA1A;TUBA1C;TUBA1B	Tubulin alpha-1A chain;Tubulin alpha-1C chain;Tubulin alpha-1B chain	>sp|Q71U36|TBA1A_HUMAN Tubulin alpha-1A chain OS=Homo sapiens GN=TUBA1A PE=1 SV=1;>sp|Q71U36-2|TBA1A_HUMAN Isoform 2 of Tubulin alpha-1A chain OS=Homo sapiens GN=TUBA1A;>tr|F8VQQ4|F8VQQ4_HUMAN Tubulin alpha-1A chain (Fragment) OS=Homo sapiens GN=TUBA1A PE=	MULTI-MSMS		JACB153_1	MDA-MB-231 R10K8	571.64	3	567.973	1700.9	46511.6	0.37769	-0.1204	0.25729	567.973	571.31	65.502	25.833	0.76986	65.502	65.214	65.984	0		0	0	0	1.7682e-07	3	22730	140.1	132.69	1	85.305	11.075	0
GEMMDLQHGSLFLR	14	0	1	Unmodified	_GEMMDLQHGSLFLR_			0	0	P00338-3;P00338;P00338-4;P00338-2;P00338-5;F5GXY2;F5GYU2;F5GXH2;F5H6W8;F5H5J4	P00338-3	P00338-3	LDHA	L-lactate dehydrogenase A chain	>sp|P00338-3|LDHA_HUMAN Isoform 3 of L-lactate dehydrogenase A chain OS=Homo sapiens GN=LDHA;>sp|P00338|LDHA_HUMAN L-lactate dehydrogenase A chain OS=Homo sapiens GN=LDHA PE=1 SV=2;>sp|P00338-4|LDHA_HUMAN Isoform 4 of L-lactate dehydrogenase A chain OS=Hom	MULTI-MSMS		JACB153_1	MDA-MB-231 R10K8	548.6	3	545.266	1632.78	46590.3	0.14811	-0.27918	-0.13107	545.266	548.602	51.02	21.008	0.95243	51.02	50.681	51.634	3.8147e-06		0	0	0	1.1125e-05	2	17547	135.58	130.61	1	85.848	11.145	0
CMPTFQFFK	9	1	0	Unmodified	_CMPTFQFFK_			0	0	P10599;P10599-2	P10599	P10599	TXN	Thioredoxin	>sp|P10599|THIO_HUMAN Thioredoxin OS=Homo sapiens GN=TXN PE=1 SV=3;>sp|P10599-2|THIO_HUMAN Isoform 2 of Thioredoxin OS=Homo sapiens GN=TXN	MULTI-MSMS		JACB153_1	MDA-MB-231 R10K8	607.28	2	603.278	1204.54	44429.6	-0.27449	-0.50067	-0.77517	603.277	607.285	58.859	23.617	0.68658	58.859	58.583	59.27	0		0	0	0	0.0029942	1	20379	87.308	82.612	1	85.976	1.5793	0
EQVANSAFVER	11	0	1	Unmodified	_EQVANSAFVER_			0	0	P08238;Q58FF7	P08238	P08238	HSP90AB1;HSP90AB3P	Heat shock protein HSP 90-beta;Putative heat shock protein HSP 90-beta-3	>sp|P08238|HS90B_HUMAN Heat shock protein HSP 90-beta OS=Homo sapiens GN=HSP90AB1 PE=1 SV=4;>sp|Q58FF7|H90B3_HUMAN Putative heat shock protein HSP 90-beta-3 OS=Homo sapiens GN=HSP90AB3P PE=5 SV=1	MULTI-MSMS		JACB153_1	MDA-MB-231 R10K8	630.32	2	625.312	1248.61	42695.6	-0.22887	0.076404	-0.15246	625.313	630.317	26.971	12.988	0.72062	26.971	26.655	27.376	0		0	0	0	1.174e-05	1	7985	157.68	135.93	1	86.192	11.19	0
EGMNIVEAMER	11	0	1	Unmodified	_EGMNIVEAMER_			0	0	Q567Q0;P62937	Q567Q0;P62937	P62937	PPIA	Peptidyl-prolyl cis-trans isomerase A	>tr|Q567Q0|Q567Q0_HUMAN Peptidyl-prolyl cis-trans isomerase A OS=Homo sapiens GN=PPIA PE=1 SV=1;>sp|P62937|PPIA_HUMAN Peptidyl-prolyl cis-trans isomerase A OS=Homo sapiens GN=PPIA PE=1 SV=2	MULTI-MSMS		JACB153_1	MDA-MB-231 R10K8	644.8	2	639.794	1277.57	43402.4	-0.22864	-0.40812	-0.63677	639.794	644.799	48.648	20.213	0.8318	48.648	48.256	49.088	0		0	0	0	0.00035498	3	16540	132.5	123.61	1	86.236	11.195	0
VIGSGCNLDSAR	12	0	1	Unmodified	_VIGSGCNLDSAR_			0	0	P00338-3;P00338;P00338-4;P00338-2;P00338-5;Q6ZMR3;P07864;F5H245;G3XAP5;F5H155;F5H5G7;P07195;A8MW50	P00338-3;P07195	P00338-3	LDHA;LDHAL6A;LDHC;LDHB	L-lactate dehydrogenase A chain;L-lactate dehydrogenase A-like 6A;L-lactate dehydrogenase C chain;L-lactate dehydrogenase;L-lactate dehydrogenase B chain	>sp|P00338-3|LDHA_HUMAN Isoform 3 of L-lactate dehydrogenase A chain OS=Homo sapiens GN=LDHA;>sp|P00338|LDHA_HUMAN L-lactate dehydrogenase A chain OS=Homo sapiens GN=LDHA PE=1 SV=2;>sp|P00338-4|LDHA_HUMAN Isoform 4 of L-lactate dehydrogenase A chain OS=Hom	MULTI-MSMS		JACB153_1	MDA-MB-231 R10K8	629.81	2	624.804	1247.59	44207.2	-0.62232	-0.57899	-1.2013	624.804	629.808	23.252	11.752	1.0307	23.252	22.927	23.958	0		0	0	0	2.8741e-06	2	6506	161.99	121.4	1	86.435	11.221	0
DYFEEYGK	8	1	0	Unmodified	_DYFEEYGK_			0	0	P22626;P22626-2	P22626	P22626	HNRNPA2B1	Heterogeneous nuclear ribonucleoproteins A2/B1	>sp|P22626|ROA2_HUMAN Heterogeneous nuclear ribonucleoproteins A2/B1 OS=Homo sapiens GN=HNRNPA2B1 PE=1 SV=2;>sp|P22626-2|ROA2_HUMAN Isoform A2 of Heterogeneous nuclear ribonucleoproteins A2/B1 OS=Homo sapiens GN=HNRNPA2B1	MULTI-MSMS		JACB153_1	MDA-MB-231 R10K8	529.73	2	525.724	1049.43	48440.6	0.53752	-0.19329	0.34423	525.724	529.731	37.758	16.583	0.59394	37.758	37.475	38.069	-3.8147e-06		0	0	0	0.0093334	2	12296	72.547	71.641	1	86.453	1.4394	0
HTGPNSPDTANDGFVR	16	0	1	Unmodified	_HTGPNSPDTANDGFVR_			0	0	G8JLB6;P31943;E9PCY7;D6RBM0;D6RIU0;D6RIT2;E5RGV0;D6RIH9;D6RJ04;D6RDU3;D6RFM3;D6R9T0;D6RAM1;E7EQJ0;E5RGH4;H0YAQ2;P55795	G8JLB6;P55795	G8JLB6	HNRNPH1;HNRNPH2	Heterogeneous nuclear ribonucleoprotein H;Heterogeneous nuclear ribonucleoprotein H, N-terminally processed;Heterogeneous nuclear ribonucleoprotein H2	>tr|G8JLB6|G8JLB6_HUMAN Heterogeneous nuclear ribonucleoprotein H OS=Homo sapiens GN=HNRNPH1 PE=1 SV=1;>sp|P31943|HNRH1_HUMAN Heterogeneous nuclear ribonucleoprotein H OS=Homo sapiens GN=HNRNPH1 PE=1 SV=4;>tr|E9PCY7|E9PCY7_HUMAN Heterogeneous nuclear ribon	MULTI-MSMS		JACB153_1	MDA-MB-231 R10K8	565.6	3	562.261	1683.76	46107.3	-0.076707	-0.35867	-0.43537	562.595	565.597	21.245	11.078	0.42973	21.245	21.053	21.482	0		0	0	0	1.0283e-07	1	5725	138.01	138.01	1	86.493	11.229	0
DSLLQDGEFSMDLR	14	0	1	Unmodified	_DSLLQDGEFSMDLR_			0	0	P07737;K7EJ44	P07737	P07737	PFN1	Profilin-1	>sp|P07737|PROF1_HUMAN Profilin-1 OS=Homo sapiens GN=PFN1 PE=1 SV=2;>tr|K7EJ44|K7EJ44_HUMAN Profilin 1, isoform CRA_b OS=Homo sapiens GN=PFN1 PE=1 SV=1	MULTI-MSMS		JACB153_1	MDA-MB-231 R10K8	818.38	2	813.377	1624.74	38234	-0.38247	-0.43882	-0.82129	813.379	818.382	65.319	25.773	3.1398	65.319	64.867	68.007	0		0	0	0	6.9643e-11	7	22618	210.91	188.02	1	86.746	11.262	0
NFGIWLR	7	0	1	Unmodified	_NFGIWLR_			0	0	Q02543;M0R117;M0R1A7;M0R3D6;M0R0P7	Q02543	Q02543	RPL18A	60S ribosomal protein L18a	>sp|Q02543|RL18A_HUMAN 60S ribosomal protein L18a OS=Homo sapiens GN=RPL18A PE=1 SV=2;>tr|M0R117|M0R117_HUMAN 60S ribosomal protein L18a OS=Homo sapiens GN=RPL18A PE=1 SV=1;>tr|M0R1A7|M0R1A7_HUMAN 60S ribosomal protein L18a OS=Homo sapiens GN=RPL18A PE=1 S	MULTI-MSMS		JACB153_1	MDA-MB-231 R10K8	458.26	2	453.253	904.492	51447.8	-0.23557	0.36706	0.13149	453.254	458.258	54.149	22.046	0.83376	54.149	53.891	54.725	0		0	0	0	0.0097168	1	18632	88.029	69.298	1	86.836	11.273	0
ALDVMVSTFHK	11	1	0	Unmodified	_ALDVMVSTFHK_			0	0	P26447	P26447	P26447	S100A4	Protein S100-A4	>sp|P26447|S10A4_HUMAN Protein S100-A4 OS=Homo sapiens GN=S100A4 PE=1 SV=1	MULTI-MSMS		JACB153_1	MDA-MB-231 R10K8	419.22	3	416.553	1246.64	53443.6	0.36254	0.31592	0.67846	416.553	419.224	37.822	16.61	0.52541	37.822	37.599	38.125	0		0	0	0	0.003085	1	12350	88.441	71.499	1	86.892	1.5648	0
FVSISDLLVPK	11	1	0	Unmodified	_FVSISDLLVPK_			0	0	E7EU23;P50395;P50395-2	E7EU23	E7EU23	GDI2	Rab GDP dissociation inhibitor beta	>tr|E7EU23|E7EU23_HUMAN Rab GDP dissociation inhibitor beta OS=Homo sapiens GN=GDI2 PE=1 SV=1;>sp|P50395|GDIB_HUMAN Rab GDP dissociation inhibitor beta OS=Homo sapiens GN=GDI2 PE=1 SV=2;>sp|P50395-2|GDIB_HUMAN Isoform 2 of Rab GDP dissociation inhibitor be	MULTI-MSMS		JACB153_1	MDA-MB-231 R10K8	613.37	2	609.361	1216.71	45205.7	-0.17638	0.24268	0.066297	609.36	613.368	67.512	26.506	0.78667	67.512	67.251	68.038	0		0	0	0	0.0047567	1	23460	84.507	51.984	1	87.017	1.8395	0
FGVEQDVDMVFASFIR	16	0	1	Unmodified	_FGVEQDVDMVFASFIR_			0	0	P14618;P14618-3;H3BQ34;P14618-2;H3BTN5;Q504U3	P14618;P14618-2	P14618	PKM2	Pyruvate kinase isozymes M1/M2;Pyruvate kinase	>sp|P14618|KPYM_HUMAN Pyruvate kinase PKM OS=Homo sapiens GN=PKM PE=1 SV=4;>sp|P14618-3|KPYM_HUMAN Isoform 3 of Pyruvate kinase PKM OS=Homo sapiens GN=PKM;>tr|H3BQ34|H3BQ34_HUMAN Pyruvate kinase OS=Homo sapiens GN=PKM PE=1 SV=1;>sp|P14618-2|KPYM_HUMAN Isof	MULTI-MSMS		JACB153_1	MDA-MB-231 R10K8	624.31	3	620.638	1858.89	44587.6	-0.12829	-0.00091912	-0.12921	620.638	623.974	89.516	33.838	1.9512	89.516	89.084	91.035	0		0	0	0	1.8583e-08	4	31232	153.94	153.94	1	87.041	11.3	0
SNVSDAVAQSTR	12	0	1	Unmodified	_SNVSDAVAQSTR_			0	0	P60174;P60174-1;P60174-4	P60174	P60174	TPI1	Triosephosphate isomerase	>sp|P60174|TPIS_HUMAN Triosephosphate isomerase OS=Homo sapiens GN=TPI1 PE=1 SV=3;>sp|P60174-1|TPIS_HUMAN Isoform 2 of Triosephosphate isomerase OS=Homo sapiens GN=TPI1;>sp|P60174-4|TPIS_HUMAN Isoform 4 of Triosephosphate isomerase OS=Homo sapiens GN=TPI1	MULTI-MSMS		JACB153_1	MDA-MB-231 R10K8	622.81	2	617.805	1233.59	44458.6	-0.53717	-0.18161	-0.71878	617.805	622.809	21.171	11.059	0.44456	21.171	20.964	21.409	0		0	0	0	2.8877e-06	1	5688	161.87	161.87	1	87.083	11.305	0
EGLELPEDEEEK	12	1	0	Unmodified	_EGLELPEDEEEK_			0	0	P07900-2;P07900;Q86U12;Q58FG0;P08238;Q58FF7;Q58FF6	P07900-2;P08238;Q58FF6	P07900-2	HSP90AA1;HSP90AA5P;HSP90AB1;HSP90AB3P;HSP90AB4P	Heat shock protein HSP 90-alpha;Putative heat shock protein HSP 90-alpha A5;Heat shock protein HSP 90-beta;Putative heat shock protein HSP 90-beta-3;Putative heat shock protein HSP 90-beta 4	>sp|P07900-2|HS90A_HUMAN Isoform 2 of Heat shock protein HSP 90-alpha OS=Homo sapiens GN=HSP90AA1;>sp|P07900|HS90A_HUMAN Heat shock protein HSP 90-alpha OS=Homo sapiens GN=HSP90AA1 PE=1 SV=5;>tr|Q86U12|Q86U12_HUMAN Full-length cDNA clone CS0CAP007YF18 of T	MULTI-MSMS		JACB153_1	MDA-MB-231 R10K8	712.83	2	708.822	1415.63	41244.4	-0.42129	-0.088524	-0.50981	708.823	712.83	36.927	16.308	0.72046	36.927	36.65	37.371	0		0	0	0	0.00015107	1	11957	121.02	121.02	1	87.443	1.0736	0
NIPGITLLNVSK	12	1	0	Unmodified	_NIPGITLLNVSK_			0	0	P36578;H3BM89	P36578	P36578	RPL4	60S ribosomal protein L4	>sp|P36578|RL4_HUMAN 60S ribosomal protein L4 OS=Homo sapiens GN=RPL4 PE=1 SV=5;>tr|H3BM89|H3BM89_HUMAN 60S ribosomal protein L4 OS=Homo sapiens GN=RPL4 PE=1 SV=1	MULTI-MSMS		JACB153_1	MDA-MB-231 R10K8	638.89	2	634.882	1267.75	44241.3	-0.28183	0.14363	-0.1382	634.883	638.89	56.488	22.83	0.60164	56.488	56.242	56.844	0		0	0	0	0.005969	2	19488	83.53	67.775	1	87.595	1.6692	0
TTGIVMDSGDGVTHTVPIYEGYALPHAILR	30	0	1	Unmodified	_TTGIVMDSGDGVTHTVPIYEGYALPHAILR_			0	0	CON__P60712;P60709;P63261;I3L4N8;I3L1U9;I3L3I0	CON__P60712;P63261	CON__P60712	ACTB;ACTG1	Actin, cytoplasmic 1;Actin, cytoplasmic 1, N-terminally processed;Actin, cytoplasmic 2;Actin, cytoplasmic 2, N-terminally processed	>P60712 SWISS-PROT:P60712 (Bos taurus) Actin, cytoplasmic 1;>sp|P60709|ACTB_HUMAN Actin, cytoplasmic 1 OS=Homo sapiens GN=ACTB PE=1 SV=1;>sp|P63261|ACTG_HUMAN Actin, cytoplasmic 2 OS=Homo sapiens GN=ACTG1 PE=1 SV=1;>tr|I3L4N8|I3L4N8_HUMAN Actin, cytoplasmi	MULTI-MSMS		JACB153_1	MDA-MB-231 R10K8	799.41	4	796.659	3182.61	39093.9	-0.7923	0.041204	-0.75109	796.911	799.412	58.322	23.443	1.1833	58.322	57.93	59.113	3.8147e-06		0	0	0	4.57e-12	2	20150	128.27	128.27	1	87.647	11.379	0
ALLFIPR	7	0	1	Unmodified	_ALLFIPR_			0	0	P08238	P08238	P08238	HSP90AB1	Heat shock protein HSP 90-beta	>sp|P08238|HS90B_HUMAN Heat shock protein HSP 90-beta OS=Homo sapiens GN=HSP90AB1 PE=1 SV=4	MULTI-MSMS		JACB153_1	MDA-MB-231 R10K8	420.27	2	415.268	828.522	53368	0.091296	-0.30045	-0.20916	415.268	420.272	50.64	20.882	0.94175	50.64	50.363	51.305	-3.8147e-06		0	0	0	0.0094359	3	17289	88.734	13.424	1	87.95	11.418	0
ETSGNLEQLLLAVVK	15	1	0	Unmodified	_ETSGNLEQLLLAVVK_			0	0	P08758;D6RBL5;D6RBE9	P08758	P08758	ANXA5	Annexin A5;Annexin	>sp|P08758|ANXA5_HUMAN Annexin A5 OS=Homo sapiens GN=ANXA5 PE=1 SV=2;>tr|D6RBL5|D6RBL5_HUMAN Annexin OS=Homo sapiens GN=ANXA5 PE=1 SV=1;>tr|D6RBE9|D6RBE9_HUMAN Annexin OS=Homo sapiens GN=ANXA5 PE=1 SV=1	MULTI-MSMS		JACB153_1	MDA-MB-231 R10K8	811.47	2	807.459	1612.9	39054.4	-0.49842	0.056636	-0.44178	807.961	811.466	81.056	31.022	0.94997	81.056	80.749	81.699	0		0	0	0	6.0343e-06	2	28269	118.51	112.48	1	87.983	1.8109	0
VELQELNDR	9	0	1	Unmodified	_VELQELNDR_			0	0	P08670;B0YJC4;P17661	P08670	P08670	VIM;DES	Vimentin;Desmin	>sp|P08670|VIME_HUMAN Vimentin OS=Homo sapiens GN=VIM PE=1 SV=4;>tr|B0YJC4|B0YJC4_HUMAN Vimentin OS=Homo sapiens GN=VIM PE=1 SV=1;>sp|P17661|DESM_HUMAN Desmin OS=Homo sapiens GN=DES PE=1 SV=3	MULTI-MSMS		JACB153_1	MDA-MB-231 R10K8	563.29	2	558.288	1114.56	46201.5	0.034616	-0.47551	-0.44089	558.289	563.292	30.24	14.08	1.3493	30.24	29.887	31.236	0		0	0	0	0.00035096	1	9279	139.38	83.124	1	88.154	11.444	0
GYSFTTTAER	10	0	1	Unmodified	_GYSFTTTAER_			0	0	CON__P60712;P60709;P63261;I3L4N8;I3L1U9;I3L3I0	CON__P60712;P63261	CON__P60712	ACTB;ACTG1	Actin, cytoplasmic 1;Actin, cytoplasmic 1, N-terminally processed;Actin, cytoplasmic 2;Actin, cytoplasmic 2, N-terminally processed	>P60712 SWISS-PROT:P60712 (Bos taurus) Actin, cytoplasmic 1;>sp|P60709|ACTB_HUMAN Actin, cytoplasmic 1 OS=Homo sapiens GN=ACTB PE=1 SV=1;>sp|P63261|ACTG_HUMAN Actin, cytoplasmic 2 OS=Homo sapiens GN=ACTG1 PE=1 SV=1;>tr|I3L4N8|I3L4N8_HUMAN Actin, cytoplasmi	MULTI-MSMS		JACB153_1	MDA-MB-231 R10K8	566.77	2	566.767	1131.52	46288.8	-0.2699	-0.17242	-0.44232	566.767	571.771	27.922	13.311	1.3486	27.922	27.679	29.027	1.9073e-06		0	0	0	0.00075888	2	8390	127.76	127.76	1	88.203	11.451	0
TGPNLHGLFGR	11	0	1	Unmodified	_TGPNLHGLFGR_			0	0	P99999;C9JFR7;CON__P62894	P99999	P99999	CYCS	Cytochrome c	>sp|P99999|CYC_HUMAN Cytochrome c OS=Homo sapiens GN=CYCS PE=1 SV=2;>tr|C9JFR7|C9JFR7_HUMAN Cytochrome c (Fragment) OS=Homo sapiens GN=CYCS PE=1 SV=1;>P62894 SWISS-PROT:P62894 Cytochrome c - Bos taurus (Bovine).	MULTI-MSMS		JACB153_1	MDA-MB-231 R10K8	393.55	3	390.212	1167.61	54671.3	0.038846	0.17578	0.21463	390.213	393.548	37.368	16.455	0.67998	37.368	37.135	37.815	0		0	0	0	0.0035707	1	12154	87.298	87.298	1	88.374	11.473	0
VNLAELFK	8	1	0	Unmodified	_VNLAELFK_			0	0	P30044;P30044-2;P30044-3	P30044	P30044	PRDX5	Peroxiredoxin-5, mitochondrial	>sp|P30044|PRDX5_HUMAN Peroxiredoxin-5, mitochondrial OS=Homo sapiens GN=PRDX5 PE=1 SV=4;>sp|P30044-2|PRDX5_HUMAN Isoform Cytoplasmic+peroxisomal of Peroxiredoxin-5, mitochondrial OS=Homo sapiens GN=PRDX5;>sp|P30044-3|PRDX5_HUMAN Isoform 3 of Peroxiredoxin	MULTI-MSMS		JACB153_1	MDA-MB-231 R10K8	471.28	2	467.274	932.533	50123.7	0.3161	0.040401	0.3565	467.274	471.281	56.636	22.878	0.52969	56.636	56.371	56.9	3.8147e-06		0	0	0	0.002615	1	19539	95.099	52.5	1	88.647	2.5618	0
SGALDVLQMK	10	1	0	Acetyl (Protein N-term)	_(ac)SGALDVLQMK_			1	0	P08865;C9J9K3;A6NE09;C9JQR9	P08865	P08865	RPSA;RPSAP58	40S ribosomal protein SA	>sp|P08865|RSSA_HUMAN 40S ribosomal protein SA OS=Homo sapiens GN=RPSA PE=1 SV=4;>tr|C9J9K3|C9J9K3_HUMAN 40S ribosomal protein SA (Fragment) OS=Homo sapiens GN=RPSA PE=1 SV=2;>tr|A6NE09|A6NE09_HUMAN 40S ribosomal protein SA OS=Homo sapiens GN=RPSAP58 PE=3	MULTI-MSMS		JACB153_1	MDA-MB-231 R10K8	556.3	2	552.292	1102.57	45579.5	0.34532	-0.57917	-0.23385	552.292	556.299	65.787	25.929	0.52858	65.787	65.578	66.106	-7.6294e-06		0	0	0	0.00062922	1	22872	121.83	107.53	1	88.82	1.8572	0
GYDVIAQAQSGTGK	14	1	0	Unmodified	_GYDVIAQAQSGTGK_			0	0	P60842;P60842-2;J3KT12;J3QS69;J3KTB5;J3QL43;J3QR64;J3KS25;J3QLN6;J3QKZ9;B4E102;J3KT04;J3KS93;Q14240-2;Q14240;E7EQG2;J3KSN7;E7EMV8	P60842;Q14240-2	P60842	EIF4A1;EIF4A2	Eukaryotic initiation factor 4A-I;Eukaryotic initiation factor 4A-II	>sp|P60842|IF4A1_HUMAN Eukaryotic initiation factor 4A-I OS=Homo sapiens GN=EIF4A1 PE=1 SV=1;>sp|P60842-2|IF4A1_HUMAN Isoform 2 of Eukaryotic initiation factor 4A-I OS=Homo sapiens GN=EIF4A1;>tr|J3KT12|J3KT12_HUMAN Eukaryotic initiation factor 4A-I OS=Homo	MULTI-MSMS		JACB153_1	MDA-MB-231 R10K8	701.86	2	697.849	1393.68	42040.4	-0.30877	-0.18754	-0.49631	697.85	701.856	31.482	14.497	0.62765	31.482	31.189	31.816	0		0	0	0	0.00073191	2	9899	90.759	86.212	1	88.951	1.9354	0
IDIIPNPQER	10	0	1	Unmodified	_IDIIPNPQER_			0	0	P08238;Q58FF7	P08238	P08238	HSP90AB1;HSP90AB3P	Heat shock protein HSP 90-beta;Putative heat shock protein HSP 90-beta-3	>sp|P08238|HS90B_HUMAN Heat shock protein HSP 90-beta OS=Homo sapiens GN=HSP90AB1 PE=1 SV=4;>sp|Q58FF7|H90B3_HUMAN Putative heat shock protein HSP 90-beta-3 OS=Homo sapiens GN=HSP90AB3P PE=5 SV=1	MULTI-MSMS		JACB153_1	MDA-MB-231 R10K8	602.83	2	597.827	1193.64	45155.3	-0.33293	0.44779	0.11486	597.828	602.832	41.381	17.791	0.8394	41.381	40.967	41.806	0		0	0	0	0.005964	1	13687	77.744	59.476	1	88.955	11.548	0
GGNFGFGDSR	10	0	1	Unmodified	_GGNFGFGDSR_			0	0	P22626;P22626-2	P22626	P22626	HNRNPA2B1	Heterogeneous nuclear ribonucleoproteins A2/B1	>sp|P22626|ROA2_HUMAN Heterogeneous nuclear ribonucleoproteins A2/B1 OS=Homo sapiens GN=HNRNPA2B1 PE=1 SV=2;>sp|P22626-2|ROA2_HUMAN Isoform A2 of Heterogeneous nuclear ribonucleoproteins A2/B1 OS=Homo sapiens GN=HNRNPA2B1	MULTI-MSMS		JACB153_1	MDA-MB-231 R10K8	512.23	2	507.225	1012.44	48974.7	0.16328	-0.42888	-0.2656	507.226	512.229	29.746	13.914	0.53342	29.746	29.487	30.02	0		0	0	0	0.060996	1	9079	53.567	48.673	1	89.184	11.578	0
VIFGLFGK	8	1	0	Unmodified	_VIFGLFGK_			0	0	P23284	P23284	P23284	PPIB	Peptidyl-prolyl cis-trans isomerase B	>sp|P23284|PPIB_HUMAN Peptidyl-prolyl cis-trans isomerase B OS=Homo sapiens GN=PPIB PE=1 SV=2	MULTI-MSMS		JACB153_1	MDA-MB-231 R10K8	444.78	2	440.768	879.522	52387.1	-0.028419	0.022867	-0.005552	440.768	444.775	58.848	23.617	0.77682	58.848	58.583	59.36	0		0	0	0	0.012178	1	20356	63.486	38.563	1	89.623	2.0807	0
GAFGKPQGTVAR	12	1	1	Unmodified	_GAFGKPQGTVAR_			0	0	F8W7C6;Q96L21;H7C2C5;H7C123;P27635;X1WI28	F8W7C6;P27635	F8W7C6	RPL10;RPL10L	60S ribosomal protein L10-like;60S ribosomal protein L10	>tr|F8W7C6|F8W7C6_HUMAN 60S ribosomal protein L10 OS=Homo sapiens GN=RPL10 PE=1 SV=1;>sp|Q96L21|RL10L_HUMAN 60S ribosomal protein L10-like OS=Homo sapiens GN=RPL10L PE=1 SV=3;>tr|H7C2C5|H7C2C5_HUMAN 60S ribosomal protein L10 (Fragment) OS=Homo sapiens GN=R	MULTI-MSMS		JACB153_1	MDA-MB-231 R10K8	402.9	3	396.888	1187.64	54800.8	-0.060975	0.30675	0.24578	397.222	402.895	15.551	9.1829	0.7997	15.551	15.353	16.152	9.5367e-07		0	0	0	0.0051421	1	3630	90.614	82.509	1	89.764	132.29	0
DDDIAALVVDNGSGMCK	17	1	0	Acetyl (Protein N-term)	_(ac)DDDIAALVVDNGSGMCK_			1	0	CON__P60712;P60709;E7EVS6;G5E9R0;C9JZR7;C9JUM1;C9JTX5	CON__P60712	CON__P60712	ACTB	Actin, cytoplasmic 1;Actin, cytoplasmic 1, N-terminally processed	>P60712 SWISS-PROT:P60712 (Bos taurus) Actin, cytoplasmic 1;>sp|P60709|ACTB_HUMAN Actin, cytoplasmic 1 OS=Homo sapiens GN=ACTB PE=1 SV=1;>tr|E7EVS6|E7EVS6_HUMAN Actin, cytoplasmic 1 (Fragment) OS=Homo sapiens GN=ACTB PE=1 SV=2;>tr|G5E9R0|G5E9R0_HUMAN Actin	MULTI-MSMS		JACB153_1	MDA-MB-231 R10K8	915.41	2	911.403	1820.79	36616	-0.47831	-0.66059	-1.1389	911.403	915.41	72.585	28.195	0.70395	72.585	72.297	73.001	0		0	0	0	2.1249e-10	2	25260	172.91	167.62	1	90.074	1.2531	0
EMQPTHPIR	9	0	1	Unmodified	_EMQPTHPIR_			0	0	P27348;P31946;P31946-2;P63104;E7EX29;B0AZS6;P63104-2;H0YB80;B7Z2E6	P27348;P31946;P63104	P27348	YWHAQ;YWHAB;YWHAZ	14-3-3 protein theta;14-3-3 protein beta/alpha;14-3-3 protein beta/alpha, N-terminally processed;14-3-3 protein zeta/delta	>sp|P27348|1433T_HUMAN 14-3-3 protein theta OS=Homo sapiens GN=YWHAQ PE=1 SV=1;>sp|P31946|1433B_HUMAN 14-3-3 protein beta/alpha OS=Homo sapiens GN=YWHAB PE=1 SV=3;>sp|P31946-2|1433B_HUMAN Isoform Short of 14-3-3 protein beta/alpha OS=Homo sapiens GN=YWHAB;	MULTI-MSMS		JACB153_1	MDA-MB-231 R10K8	373.53	3	370.19	1107.55	54943.7	0.26645	0.16667	0.43312	370.525	373.527	15.13	9.0411	0.2997	15.13	15.053	15.353	-9.5367e-07		0	0	0	0.091765	1	3489	46.158	31.951	1	90.29	11.722	0
VTLTSEEEAR	10	0	1	Unmodified	_VTLTSEEEAR_			0	0	P00338-3;P00338;P00338-4	P00338-3	P00338-3	LDHA	L-lactate dehydrogenase A chain	>sp|P00338-3|LDHA_HUMAN Isoform 3 of L-lactate dehydrogenase A chain OS=Homo sapiens GN=LDHA;>sp|P00338|LDHA_HUMAN L-lactate dehydrogenase A chain OS=Homo sapiens GN=LDHA PE=1 SV=2;>sp|P00338-4|LDHA_HUMAN Isoform 4 of L-lactate dehydrogenase A chain OS=Hom	MULTI-MSMS		JACB153_1	MDA-MB-231 R10K8	567.79	2	567.785	1133.56	45088.9	0.096983	1.7077	1.8047	567.786	572.79	21.529	11.175	1.0026	21.529	21.163	22.165	0		0	0	0	0.001229	2	5865	94.616	61.354	1	90.638	11.767	0
GLGTDEDTLIEILASR	16	0	1	Unmodified	_GLGTDEDTLIEILASR_			0	0	P04083;Q5T3N1	P04083	P04083	ANXA1	Annexin A1;Annexin	>sp|P04083|ANXA1_HUMAN Annexin A1 OS=Homo sapiens GN=ANXA1 PE=1 SV=2;>tr|Q5T3N1|Q5T3N1_HUMAN Annexin (Fragment) OS=Homo sapiens GN=ANXA1 PE=1 SV=1	MULTI-MSMS		JACB153_1	MDA-MB-231 R10K8	571.64	3	568.3	1701.88	46370.8	0.3622	-0.15231	0.20989	568.3	571.636	75.946	29.313	0.77866	75.946	75.6	76.379	0		0	0	0	1.0085e-07	2	26566	138.39	138.39	1	90.649	11.768	0
NYYEQWGK	8	1	0	Unmodified	_NYYEQWGK_			0	0	P22626;P22626-2	P22626	P22626	HNRNPA2B1	Heterogeneous nuclear ribonucleoproteins A2/B1	>sp|P22626|ROA2_HUMAN Heterogeneous nuclear ribonucleoproteins A2/B1 OS=Homo sapiens GN=HNRNPA2B1 PE=1 SV=2;>sp|P22626-2|ROA2_HUMAN Isoform A2 of Heterogeneous nuclear ribonucleoproteins A2/B1 OS=Homo sapiens GN=HNRNPA2B1	MULTI-MSMS		JACB153_1	MDA-MB-231 R10K8	548.25	2	544.246	1086.48	48051.1	0.17037	0.3345	0.50487	544.246	548.253	31.414	14.468	0.77989	31.414	31.063	31.843	0		0	0	0	0.0023958	1	9775	105.57	105.57	1	90.789	1.9658	0
LISQIVSSITASLR	14	0	1	Unmodified	_LISQIVSSITASLR_			0	0	F5H5D3;Q9BQE3;F8VVB9;Q9H853;P68366;A8MUB1;C9JDS9;P68363;CON__ENSEMBL:ENSBTAP00000016242	F5H5D3;P68366;P68363	P68363	TUBA1C;TUBA1B;TUBA4B;TUBA4A	Tubulin alpha-1C chain;Putative tubulin-like protein alpha-4B;Tubulin alpha-4A chain;Tubulin alpha-1B chain	>tr|F5H5D3|F5H5D3_HUMAN Tubulin alpha-1C chain OS=Homo sapiens GN=TUBA1C PE=1 SV=1;>sp|Q9BQE3|TBA1C_HUMAN Tubulin alpha-1C chain OS=Homo sapiens GN=TUBA1C PE=1 SV=1;>tr|F8VVB9|F8VVB9_HUMAN Tubulin alpha-1B chain (Fragment) OS=Homo sapiens GN=TUBA1B PE=2 SV	MULTI-MSMS		JACB153_1	MDA-MB-231 R10K8	749.45	2	744.443	1486.87	40423.5	-0.17373	0.041663	-0.13207	744.443	749.447	73.211	28.403	1.735	73.211	72.877	74.612	0		0	0	0	1.1393e-10	2	25590	205.61	205.61	1	90.842	11.793	0
LTGMAFR	7	0	1	Unmodified	_LTGMAFR_			0	0	P04406;P04406-2;E7EUT5;O14556	P04406	P04406	GAPDH;GAPDHS	Glyceraldehyde-3-phosphate dehydrogenase;Glyceraldehyde-3-phosphate dehydrogenase, testis-specific	>sp|P04406|G3P_HUMAN Glyceraldehyde-3-phosphate dehydrogenase OS=Homo sapiens GN=GAPDH PE=1 SV=3;>sp|P04406-2|G3P_HUMAN Isoform 2 of Glyceraldehyde-3-phosphate dehydrogenase OS=Homo sapiens GN=GAPDH;>tr|E7EUT5|E7EUT5_HUMAN Glyceraldehyde-3-phosphate dehydr	MULTI-MSMS		JACB153_1	MDA-MB-231 R10K8	403.22	2	398.213	794.411	54210.8	-0.050994	0.44471	0.39371	398.213	403.217	30.469	14.153	0.8122	30.469	30.251	31.063	1.9073e-06		0	0	0	0.007633	2	9392	93.262	44.759	1	90.863	11.796	0
VDNDENEHQLSLR	13	0	1	Unmodified	_VDNDENEHQLSLR_			0	0	P06748;P06748-2;P06748-3;E5RGW4	P06748	P06748	NPM1	Nucleophosmin	>sp|P06748|NPM_HUMAN Nucleophosmin OS=Homo sapiens GN=NPM1 PE=1 SV=2;>sp|P06748-2|NPM_HUMAN Isoform 2 of Nucleophosmin OS=Homo sapiens GN=NPM1;>sp|P06748-3|NPM_HUMAN Isoform 3 of Nucleophosmin OS=Homo sapiens GN=NPM1;>tr|E5RGW4|E5RGW4_HUMAN Nucleophosmin (	MULTI-MSMS		JACB153_1	MDA-MB-231 R10K8	526.92	3	523.582	1567.72	48726.7	0.17907	0.01774	0.19681	523.582	526.918	22.243	11.413	0.86115	22.243	21.972	22.833	0		0	0	0	7.8825e-05	2	6077	122.45	114.14	1	90.914	11.803	0
ISLPLPNFSSLNLR	14	0	1	Unmodified	_ISLPLPNFSSLNLR_			0	0	P08670;B0YJC4	P08670	P08670	VIM	Vimentin	>sp|P08670|VIME_HUMAN Vimentin OS=Homo sapiens GN=VIM PE=1 SV=4;>tr|B0YJC4|B0YJC4_HUMAN Vimentin OS=Homo sapiens GN=VIM PE=1 SV=1	MULTI-MSMS		JACB153_1	MDA-MB-231 R10K8	790.96	2	785.951	1569.89	39793	-0.34341	-0.1759	-0.51931	785.952	790.955	73.049	28.349	1.0488	73.049	72.609	73.657	-7.6294e-06		0	0	0	7.6771e-07	3	25423	155.98	155.98	1	91.634	11.896	0
NTDEMVELR	9	0	1	Unmodified	_NTDEMVELR_			0	0	P61978-3;Q5T6W5;Q5T6W2;S4R457;P61978-2;P61978	P61978-3;P61978-2	P61978-2	HNRNPK	Heterogeneous nuclear ribonucleoprotein K	>sp|P61978-3|HNRPK_HUMAN Isoform 3 of Heterogeneous nuclear ribonucleoprotein K OS=Homo sapiens GN=HNRNPK;>tr|Q5T6W5|Q5T6W5_HUMAN Heterogeneous nuclear ribonucleoprotein K OS=Homo sapiens GN=HNRNPK PE=1 SV=1;>tr|Q5T6W2|Q5T6W2_HUMAN Heterogeneous nuclear ri	MULTI-MSMS		JACB153_1	MDA-MB-231 R10K8	558.77	2	553.761	1105.51	45943.9	0.10817	-0.3302	-0.22203	554.263	558.765	31.337	14.446	0.53429	31.337	31.092	31.627	0		0	0	0	0.0004763	1	9725	132.88	120.66	1	91.767	11.913	0
AEYLASIFGTEK	12	1	0	Acetyl (Protein N-term)	_(ac)AEYLASIFGTEK_			1	0	Q01081;Q01081-2;Q8WU68;Q8WU68-3;Q8WU68-2;M0R2N4;Q01081-3;M0QYK5;K7EJM7;K7EJH3;K7EPL9	Q01081	Q01081	U2AF1;U2AF1L4	Splicing factor U2AF 35 kDa subunit;Splicing factor U2AF 26 kDa subunit	>sp|Q01081|U2AF1_HUMAN Splicing factor U2AF 35 kDa subunit OS=Homo sapiens GN=U2AF1 PE=1 SV=3;>sp|Q01081-2|U2AF1_HUMAN Isoform 2 of Splicing factor U2AF 35 kDa subunit OS=Homo sapiens GN=U2AF1;>sp|Q8WU68|U2AF4_HUMAN Splicing factor U2AF 26 kDa subunit OS=H	MULTI-MSMS		JACB153_1	MDA-MB-231 R10K8	689.85	2	685.846	1369.68	42020.8	-0.37401	0.19744	-0.17656	685.846	689.853	92.777	34.926	0.63034	92.777	92.468	93.098	0		0	0	0	8.4147e-05	2	32391	126.1	126.1	1	91.857	3.375	0
GLGTDEESILTLLTSR	16	0	1	Unmodified	_GLGTDEESILTLLTSR_			0	0	P08758;E9PHT9	P08758	P08758	ANXA5	Annexin A5;Annexin	>sp|P08758|ANXA5_HUMAN Annexin A5 OS=Homo sapiens GN=ANXA5 PE=1 SV=2;>tr|E9PHT9|E9PHT9_HUMAN Annexin OS=Homo sapiens GN=ANXA5 PE=1 SV=1	MULTI-MSMS		JACB153_1	MDA-MB-231 R10K8	857.96	2	852.954	1703.89	37990.7	-0.4623	0.096752	-0.36555	852.954	857.959	77.92	29.976	0.87679	77.92	77.571	78.447	0		0	0	0	3.0102e-17	2	27252	219.52	219.52	1	91.928	11.934	0
FYPEDVSEELIQDITQR	17	0	1	Unmodified	_FYPEDVSEELIQDITQR_			0	0	P26038;V9GZ54	P26038	P26038	MSN	Moesin	>sp|P26038|MOES_HUMAN Moesin OS=Homo sapiens GN=MSN PE=1 SV=3;>tr|V9GZ54|V9GZ54_HUMAN Moesin (Fragment) OS=Homo sapiens GN=MSN PE=1 SV=1	MULTI-MSMS		JACB153_1	MDA-MB-231 R10K8	698.01	3	694.672	2081	41800.9	-0.2438	0.059239	-0.18456	695.007	698.009	80.083	30.691	1.2849	80.083	79.645	80.93	0		0	0	0	1.8814e-08	2	27968	130.01	130.01	1	92.112	11.958	0
ACQSIYPLHDVFVR	14	0	1	Unmodified	_ACQSIYPLHDVFVR_			0	0	P61247;D6RAT0;D6RG13;H0Y9Y4;D6RB09;D6R9B6	P61247	P61247	RPS3A	40S ribosomal protein S3a	>sp|P61247|RS3A_HUMAN 40S ribosomal protein S3a OS=Homo sapiens GN=RPS3A PE=1 SV=2;>tr|D6RAT0|D6RAT0_HUMAN 40S ribosomal protein S3a OS=Homo sapiens GN=RPS3A PE=1 SV=1;>tr|D6RG13|D6RG13_HUMAN 40S ribosomal protein S3a (Fragment) OS=Homo sapiens GN=RPS3A PE	MULTI-MSMS		JACB153_1	MDA-MB-231 R10K8	572.63	3	568.956	1703.85	46172	0.26924	-1.2075	-0.93827	569.29	572.291	46.798	19.602	0.6759	46.798	46.47	47.146	0		0	0	0	2.8108e-05	1	15851	119.32	119.32	1	92.155	11.964	0
EVFEDAAEIR	10	0	1	Unmodified	_EVFEDAAEIR_			0	0	P19338;H7BY16	P19338	P19338	NCL	Nucleolin	>sp|P19338|NUCL_HUMAN Nucleolin OS=Homo sapiens GN=NCL PE=1 SV=3;>tr|H7BY16|H7BY16_HUMAN Nucleolin (Fragment) OS=Homo sapiens GN=NCL PE=1 SV=2	MULTI-MSMS		JACB153_1	MDA-MB-231 R10K8	594.79	2	589.788	1177.56	45373.5	0.11969	-0.16451	-0.044815	589.787	594.792	38.024	16.675	0.7768	38.024	37.599	38.376	-3.8147e-06		0	0	0	0.0095531	1	12533	65.5	65.5	1	92.171	11.966	0
AIPQLQGYLR	10	0	1	Unmodified	_AIPQLQGYLR_			0	0	Q02878	Q02878	Q02878	RPL6	60S ribosomal protein L6	>sp|Q02878|RL6_HUMAN 60S ribosomal protein L6 OS=Homo sapiens GN=RPL6 PE=1 SV=3	MULTI-MSMS		JACB153_1	MDA-MB-231 R10K8	584.84	2	579.835	1157.66	46003.3	-0.080656	-0.24521	-0.32586	579.836	584.839	47.624	19.877	0.54986	47.624	47.292	47.842	3.8147e-06		0	0	0	0.006339	1	16155	76.465	76.465	1	92.204	11.97	0
EEAENTLQSFR	11	0	1	Unmodified	_EEAENTLQSFR_			0	0	P08670;B0YJC4;B0YJC5;Q5JVS8	P08670	P08670	VIM	Vimentin	>sp|P08670|VIME_HUMAN Vimentin OS=Homo sapiens GN=VIM PE=1 SV=4;>tr|B0YJC4|B0YJC4_HUMAN Vimentin OS=Homo sapiens GN=VIM PE=1 SV=1;>tr|B0YJC5|B0YJC5_HUMAN Vimentin OS=Homo sapiens GN=VIM PE=1 SV=1;>tr|Q5JVS8|Q5JVS8_HUMAN Vimentin (Fragment) OS=Homo sapiens	MULTI-MSMS		JACB153_1	MDA-MB-231 R10K8	667.32	2	662.312	1322.61	42680	-0.53144	0.046826	-0.48461	662.314	667.317	33.171	15.056	0.82397	33.171	32.819	33.643	0		0	0	0	4.9539e-06	2	10533	175.15	132.76	1	92.31	11.984	0
LLLPWLEAR	9	0	1	Unmodified	_LLLPWLEAR_			0	0	Q00610;Q00610-2	Q00610	Q00610	CLTC	Clathrin heavy chain 1	>sp|Q00610|CLH1_HUMAN Clathrin heavy chain 1 OS=Homo sapiens GN=CLTC PE=1 SV=5;>sp|Q00610-2|CLH1_HUMAN Isoform 2 of Clathrin heavy chain 1 OS=Homo sapiens GN=CLTC	MULTI-MSMS		JACB153_1	MDA-MB-231 R10K8	560.84	2	555.837	1109.66	46841.3	0.12252	0.18344	0.30596	556.339	560.841	68.942	26.985	0.77106	68.942	68.643	69.414	-7.6294e-06		0	0	0	0.0010912	2	23967	94.692	90.353	1	92.646	12.028	0
LDIDSPPITAR	11	0	1	Unmodified	_LDIDSPPITAR_			0	0	P14618;H3BQ34;H3BTJ2;H3BUW1;H3BT25;H3BU13;H3BQZ3;H3BN34;P14618-2;H3BTN5	P14618;P14618-2	P14618	PKM2	Pyruvate kinase isozymes M1/M2;Pyruvate kinase	>sp|P14618|KPYM_HUMAN Pyruvate kinase PKM OS=Homo sapiens GN=PKM PE=1 SV=4;>tr|H3BQ34|H3BQ34_HUMAN Pyruvate kinase OS=Homo sapiens GN=PKM PE=1 SV=1;>tr|H3BTJ2|H3BTJ2_HUMAN Pyruvate kinase PKM (Fragment) OS=Homo sapiens GN=PKM PE=1 SV=1;>tr|H3BUW1|H3BUW1_HU	MULTI-MSMS		JACB153_1	MDA-MB-231 R10K8	604.33	2	599.327	1196.64	44581.9	-0.32886	0.78572	0.45686	599.328	604.332	41.481	17.831	1.1635	41.481	40.833	41.997	0		0	0	0	0.00052798	1	13804	118.48	93.01	1	92.743	12.04	0
VVLAYEPVWAIGTGK	15	1	0	Unmodified	_VVLAYEPVWAIGTGK_			0	0	P60174;P60174-1;P60174-4;U3KPZ0;U3KQF3	P60174	P60174	TPI1	Triosephosphate isomerase	>sp|P60174|TPIS_HUMAN Triosephosphate isomerase OS=Homo sapiens GN=TPI1 PE=1 SV=3;>sp|P60174-1|TPIS_HUMAN Isoform 2 of Triosephosphate isomerase OS=Homo sapiens GN=TPI1;>sp|P60174-4|TPIS_HUMAN Isoform 4 of Triosephosphate isomerase OS=Homo sapiens GN=TPI1;	MULTI-MSMS		JACB153_1	MDA-MB-231 R10K8	805.96	2	801.948	1601.88	39239.5	-0.30372	0.35409	0.050371	801.947	805.955	63.528	25.18	0.66982	63.528	63.301	63.971	0		0	0	0	2.2506e-07	2	22069	135.37	135.37	1	92.954	1.3018	0
QDVDNASLAR	10	0	1	Unmodified	_QDVDNASLAR_			0	0	P08670;B0YJC4;B0YJC5;Q5JVS8	P08670	P08670	VIM	Vimentin	>sp|P08670|VIME_HUMAN Vimentin OS=Homo sapiens GN=VIM PE=1 SV=4;>tr|B0YJC4|B0YJC4_HUMAN Vimentin OS=Homo sapiens GN=VIM PE=1 SV=1;>tr|B0YJC5|B0YJC5_HUMAN Vimentin OS=Homo sapiens GN=VIM PE=1 SV=1;>tr|Q5JVS8|Q5JVS8_HUMAN Vimentin (Fragment) OS=Homo sapiens	MULTI-MSMS		JACB153_1	MDA-MB-231 R10K8	549.77	2	544.77	1087.53	45856.1	0.1569	-0.049788	0.10711	544.771	549.774	19.59	10.529	0.98039	19.59	19.259	20.239	0		0	0	0	0.00012435	1	5085	152.54	139.96	1	92.989	12.072	0
MTDQEAIQDLWQWR	14	0	1	Unmodified	_MTDQEAIQDLWQWR_			0	0	P06748;P06748-2	P06748	P06748	NPM1	Nucleophosmin	>sp|P06748|NPM_HUMAN Nucleophosmin OS=Homo sapiens GN=NPM1 PE=1 SV=2;>sp|P06748-2|NPM_HUMAN Isoform 2 of Nucleophosmin OS=Homo sapiens GN=NPM1	MULTI-MSMS		JACB153_1	MDA-MB-231 R10K8	610.62	3	607.286	1818.84	44778.6	-0.17015	0.022097	-0.14805	607.287	610.622	71.108	27.703	0.97298	71.108	70.645	71.618	0		0	0	0	1.3115e-05	2	24822	131.66	131.66	1	93.007	12.074	0
IGFPWSEIR	9	0	1	Unmodified	_IGFPWSEIR_			0	0	P26038;P15311;E7EQR4;P35241-5;P35241;P35241-4	P26038;P15311;P35241-5	P26038	MSN;EZR;RDX	Moesin;Ezrin;Radixin	>sp|P26038|MOES_HUMAN Moesin OS=Homo sapiens GN=MSN PE=1 SV=3;>sp|P15311|EZRI_HUMAN Ezrin OS=Homo sapiens GN=EZR PE=1 SV=4;>tr|E7EQR4|E7EQR4_HUMAN Ezrin OS=Homo sapiens GN=EZR PE=1 SV=2;>sp|P35241-5|RADI_HUMAN Isoform 5 of Radixin OS=Homo sapiens GN=RDX;>s	MULTI-MSMS		JACB153_1	MDA-MB-231 R10K8	557.8	2	552.795	1103.58	47095.6	0.3008	-0.24648	0.054315	552.796	557.799	59.288	23.762	0.77417	59.288	59.053	59.827	3.8147e-06		0	0	0	0.0016795	1	20591	91.867	68.949	1	93.182	12.097	0
LGDLYEEEMR	10	0	1	Unmodified	_LGDLYEEEMR_			0	0	P08670;B0YJC4	P08670	P08670	VIM	Vimentin	>sp|P08670|VIME_HUMAN Vimentin OS=Homo sapiens GN=VIM PE=1 SV=4;>tr|B0YJC4|B0YJC4_HUMAN Vimentin OS=Homo sapiens GN=VIM PE=1 SV=1	MULTI-MSMS		JACB153_1	MDA-MB-231 R10K8	632.79	2	627.787	1253.56	43117.4	-0.28534	-0.97084	-1.2562	627.787	632.791	38.643	16.881	0.82335	38.643	38.391	39.215	0		0	0	0	0.00086815	3	12659	121.9	107.22	1	93.533	12.143	0
SGAQASSTPLSPTR	14	0	1	Unmodified	_SGAQASSTPLSPTR_			0	0	P02545;P02545-3;P02545-6;P02545-2	P02545;P02545-2	P02545	LMNA	Prelamin-A/C;Lamin-A/C	>sp|P02545|LMNA_HUMAN Prelamin-A/C OS=Homo sapiens GN=LMNA PE=1 SV=1;>sp|P02545-3|LMNA_HUMAN Isoform ADelta10 of Prelamin-A/C OS=Homo sapiens GN=LMNA;>sp|P02545-6|LMNA_HUMAN Isoform 6 of Prelamin-A/C OS=Homo sapiens GN=LMNA;>sp|P02545-2|LMNA_HUMAN Isoform	MULTI-MSMS		JACB153_1	MDA-MB-231 R10K8	685.35	2	680.347	1358.68	41961.9	-0.87822	0.39937	-0.47885	680.348	685.351	21.125	11.041	0.54459	21.125	20.908	21.453	1.9073e-06		0	0	0	5.5371e-06	1	5667	146.59	146.59	1	93.615	12.153	0
YYVTIIDAPGHR	12	0	1	Unmodified	_YYVTIIDAPGHR_			0	0	P68104;Q5VTE0;Q5JR01;A6PW80	P68104	P68104	EEF1A1;EEF1A1P5	Elongation factor 1-alpha 1;Putative elongation factor 1-alpha-like 3	>sp|P68104|EF1A1_HUMAN Elongation factor 1-alpha 1 OS=Homo sapiens GN=EEF1A1 PE=1 SV=1;>sp|Q5VTE0|EF1A3_HUMAN Putative elongation factor 1-alpha-like 3 OS=Homo sapiens GN=EEF1A1P5 PE=5 SV=1;>tr|Q5JR01|Q5JR01_HUMAN Elongation factor 1-alpha 1 (Fragment) OS=	MULTI-MSMS		JACB153_1	MDA-MB-231 R10K8	472.25	3	468.914	1403.72	50695.6	0.34765	-1.1862	-0.83853	468.914	472.249	37.324	16.444	0.8971	37.324	37.085	37.983	0		0	0	0	0.00033087	2	12128	97.163	88.753	1	93.882	12.188	0
LISQIVSSITASLR	14	0	1	Unmodified	_LISQIVSSITASLR_			0	0	F5H5D3;Q9BQE3;F8VVB9;Q9H853;P68366;A8MUB1;C9JDS9;P68363;CON__ENSEMBL:ENSBTAP00000016242	F5H5D3;P68366;P68363	P68363	TUBA1C;TUBA1B;TUBA4B;TUBA4A	Tubulin alpha-1C chain;Putative tubulin-like protein alpha-4B;Tubulin alpha-4A chain;Tubulin alpha-1B chain	>tr|F5H5D3|F5H5D3_HUMAN Tubulin alpha-1C chain OS=Homo sapiens GN=TUBA1C PE=1 SV=1;>sp|Q9BQE3|TBA1C_HUMAN Tubulin alpha-1C chain OS=Homo sapiens GN=TUBA1C PE=1 SV=1;>tr|F8VVB9|F8VVB9_HUMAN Tubulin alpha-1B chain (Fragment) OS=Homo sapiens GN=TUBA1B PE=2 SV	MULTI-MSMS		JACB153_1	MDA-MB-231 R10K8	499.97	3	496.631	1486.87	49725.8	0.3585	-0.24557	0.11293	496.631	499.967	73.211	28.403	1.5786	73.211	72.877	74.456	0		0	0	0	2.2795e-06	4	25579	153	153	1	94.106	12.217	0
SLYASSPGGVYATR	14	0	1	Unmodified	_SLYASSPGGVYATR_			0	0	P08670;B0YJC4	P08670	P08670	VIM	Vimentin	>sp|P08670|VIME_HUMAN Vimentin OS=Homo sapiens GN=VIM PE=1 SV=4;>tr|B0YJC4|B0YJC4_HUMAN Vimentin OS=Homo sapiens GN=VIM PE=1 SV=1	MULTI-MSMS		JACB153_1	MDA-MB-231 R10K8	719.86	2	714.86	1427.7	40992.6	-0.3281	-0.43822	-0.76632	715.361	719.864	33.312	15.1	0.52892	33.312	33.07	33.599	0		0	0	0	5.5939e-06	3	10486	146.47	128.67	1	94.623	12.284	0
MELQEIQLK	9	1	0	Unmodified	_MELQEIQLK_			0	0	P06753-2;Q5VU59;P06753-5;P06753-6;P06753-3;Q5VU61;P06753-4;P06753-7;J3KN67;P06753	P06753-2;J3KN67	P06753-2	TPM3	Tropomyosin alpha-3 chain	>sp|P06753-2|TPM3_HUMAN Isoform 2 of Tropomyosin alpha-3 chain OS=Homo sapiens GN=TPM3;>tr|Q5VU59|Q5VU59_HUMAN Uncharacterized protein OS=Homo sapiens GN=TPM3 PE=1 SV=1;>sp|P06753-5|TPM3_HUMAN Isoform 5 of Tropomyosin alpha-3 chain OS=Homo sapiens GN=TPM3;	MULTI-MSMS		JACB153_1	MDA-MB-231 R10K8	570.31	2	566.308	1130.6	45529.6	0.17476	-0.21074	-0.035982	566.308	570.315	43.792	18.599	0.86316	43.792	43.269	44.132	0		0	0	0	0.00061704	1	14712	125.57	0	1	94.63	1.6557	0
DLLDDLK	7	1	0	Unmodified	_DLLDDLK_			0	0	P08758;D6RBL5;E9PHT9	P08758	P08758	ANXA5	Annexin A5;Annexin	>sp|P08758|ANXA5_HUMAN Annexin A5 OS=Homo sapiens GN=ANXA5 PE=1 SV=2;>tr|D6RBL5|D6RBL5_HUMAN Annexin OS=Homo sapiens GN=ANXA5 PE=1 SV=1;>tr|E9PHT9|E9PHT9_HUMAN Annexin OS=Homo sapiens GN=ANXA5 PE=1 SV=1	MULTI-MSMS		JACB153_1	MDA-MB-231 R10K8	420.23	2	416.227	830.439	53715	0.16813	-0.36291	-0.19478	416.226	420.233	53.246	21.753	0.63912	53.246	52.988	53.627	0		0	0	0	0.0081729	1	18279	91.906	0	1	94.808	1.9084	0
FYEEVHDLER	10	0	1	Unmodified	_FYEEVHDLER_			0	0	P55209;H0YIV4;F5H4R6;P55209-2;F8VY35;F8W0J6;F8W543;F8VUX1;F8W020;F8VXI6;H0YHC3;H0YH88;F8VVB5;F8VV59;B7Z9C2;F8W118;B3KV44;F8VRJ2;Q99733-2;Q99733;C9JZI7;C9J6D1;A8MXH2;E9PNJ7;E9PS34;E9PJJ2;E9PNW0;E9PKT8	P55209;F8VV59;Q99733-2	Q99733-2	NAP1L1;NAP1L4	Nucleosome assembly protein 1-like 1;Nucleosome assembly protein 1-like 4	>sp|P55209|NP1L1_HUMAN Nucleosome assembly protein 1-like 1 OS=Homo sapiens GN=NAP1L1 PE=1 SV=1;>tr|H0YIV4|H0YIV4_HUMAN Nucleosome assembly protein 1-like 1 (Fragment) OS=Homo sapiens GN=NAP1L1 PE=1 SV=1;>tr|F5H4R6|F5H4R6_HUMAN Nucleosome assembly protein	MULTI-MSMS		JACB153_1	MDA-MB-231 R10K8	449.55	3	446.21	1335.61	52301.9	-0.17416	-0.017974	-0.19213	446.21	449.547	30.203	14.068	0.66746	30.203	29.905	30.572	0		0	0	0	0.0018276	1	9252	91.855	83.125	1	95.031	12.337	0
NMMAACDPR	9	0	1	Unmodified	_NMMAACDPR_			0	0	Q13509;Q13509-2;P07437;Q5JP53;Q5ST81;A6NNZ2;I3L2F9;P68371;Q3ZCM7;Q5SQY0;F5H0I4;Q13885;P04350;Q9BUF5;K7ESM5;Q9BVA1	Q13509;P07437;P68371;Q3ZCM7;Q13885;P04350;Q9BUF5;Q9BVA1	P68371	TUBB3;TUBB;TUBB4B;TUBB8;RP11-631M21.2;TUBB2A;TUBB4A;TUBB6;TUBB2B	Tubulin beta-3 chain;Tubulin beta chain;Tubulin beta-8 chain B;Tubulin beta-4B chain;Tubulin beta-8 chain;Tubulin beta-2A chain;Tubulin beta-4A chain;Tubulin beta-6 chain;Tubulin beta-2B chain	>sp|Q13509|TBB3_HUMAN Tubulin beta-3 chain OS=Homo sapiens GN=TUBB3 PE=1 SV=2;>sp|Q13509-2|TBB3_HUMAN Isoform 2 of Tubulin beta-3 chain OS=Homo sapiens GN=TUBB3;>sp|P07437|TBB5_HUMAN Tubulin beta chain OS=Homo sapiens GN=TUBB PE=1 SV=2;>tr|Q5JP53|Q5JP53_HU	MULTI-MSMS		JACB153_1	MDA-MB-231 R10K8	538.22	2	533.217	1064.42	47395.1	0.16007	-1.2643	-1.1042	533.217	538.221	21.476	11.156	0.76132	21.476	21.136	21.897	0		0	0	0	0.00097838	2	5803	102.06	102.06	1	95.393	12.384	0
IGGIGTVPVGR	11	0	1	Unmodified	_IGGIGTVPVGR_			0	0	Q05639;P68104;Q5VTE0	Q05639;P68104	P68104	EEF1A2;EEF1A1;EEF1A1P5	Elongation factor 1-alpha 2;Elongation factor 1-alpha 1;Putative elongation factor 1-alpha-like 3	>sp|Q05639|EF1A2_HUMAN Elongation factor 1-alpha 2 OS=Homo sapiens GN=EEF1A2 PE=1 SV=1;>sp|P68104|EF1A1_HUMAN Elongation factor 1-alpha 1 OS=Homo sapiens GN=EEF1A1 PE=1 SV=1;>sp|Q5VTE0|EF1A3_HUMAN Putative elongation factor 1-alpha-like 3 OS=Homo sapiens G	MULTI-MSMS		JACB153_1	MDA-MB-231 R10K8	518.31	2	513.309	1024.6	48501.2	0.22925	-1.6161	-1.3868	513.31	518.312	34.753	15.584	0.83332	34.753	34.495	35.328	3.8147e-06		0	0	0	0.00068341	3	11090	103.34	68.621	1	95.762	12.432	0
GLGTDEDTLIEILASR	16	0	1	Unmodified	_GLGTDEDTLIEILASR_			0	0	P04083;Q5T3N1	P04083	P04083	ANXA1	Annexin A1;Annexin	>sp|P04083|ANXA1_HUMAN Annexin A1 OS=Homo sapiens GN=ANXA1 PE=1 SV=2;>tr|Q5T3N1|Q5T3N1_HUMAN Annexin (Fragment) OS=Homo sapiens GN=ANXA1 PE=1 SV=1	MULTI-MSMS		JACB153_1	MDA-MB-231 R10K8	856.95	2	851.947	1701.88	38039.3	-0.3717	-0.22118	-0.59289	852.447	856.95	75.947	29.313	0.95902	75.947	75.6	76.559	0		0	0	0	4.7822e-24	2	26553	267.47	267.47	1	95.765	12.432	0
YSLEPVAVELK	11	1	0	Unmodified	_YSLEPVAVELK_			0	0	P00558;B7Z7A9	P00558	P00558	PGK1	Phosphoglycerate kinase 1;Phosphoglycerate kinase	>sp|P00558|PGK1_HUMAN Phosphoglycerate kinase 1 OS=Homo sapiens GN=PGK1 PE=1 SV=3;>tr|B7Z7A9|B7Z7A9_HUMAN Phosphoglycerate kinase OS=Homo sapiens GN=PGK1 PE=1 SV=1	MULTI-MSMS		JACB153_1	MDA-MB-231 R10K8	628.36	2	624.348	1246.68	44206.5	-0.14743	0.26904	0.12161	624.85	628.355	49.852	20.619	0.65697	49.852	49.535	50.192	0		0	0	0	0.0007463	1	17104	97.214	97.214	1	96.531	1.3076	0
SQIHDIVLVGGSTR	14	0	1	Unmodified	_SQIHDIVLVGGSTR_			0	0	P11142;E9PKE3;P11142-2;E9PNE6;E9PN89;A8K7Q2	P11142	P11142	HSPA8	Heat shock cognate 71 kDa protein	>sp|P11142|HSP7C_HUMAN Heat shock cognate 71 kDa protein OS=Homo sapiens GN=HSPA8 PE=1 SV=1;>tr|E9PKE3|E9PKE3_HUMAN Heat shock cognate 71 kDa protein OS=Homo sapiens GN=HSPA8 PE=1 SV=1;>sp|P11142-2|HSP7C_HUMAN Isoform 2 of Heat shock cognate 71 kDa protein	MULTI-MSMS		JACB153_1	MDA-MB-231 R10K8	497.94	3	494.607	1480.8	49456.9	0.099551	-0.50886	-0.40931	494.608	497.943	32.95	14.983	0.7999	32.95	32.698	33.498	0		0	0	0	0.025139	1	10350	59.261	47.787	1	96.693	12.553	0
NPDDITNEEYGEFYK	15	1	0	Unmodified	_NPDDITNEEYGEFYK_			0	0	P07900-2;P07900;Q86U12	P07900-2	P07900-2	HSP90AA1	Heat shock protein HSP 90-alpha	>sp|P07900-2|HS90A_HUMAN Isoform 2 of Heat shock protein HSP 90-alpha OS=Homo sapiens GN=HSP90AA1;>sp|P07900|HS90A_HUMAN Heat shock protein HSP 90-alpha OS=Homo sapiens GN=HSP90AA1 PE=1 SV=5;>tr|Q86U12|Q86U12_HUMAN Full-length cDNA clone CS0CAP007YF18 of T	MULTI-MSMS		JACB153_1	MDA-MB-231 R10K8	921.4	2	917.394	1832.77	36834.2	-0.67664	0.13367	-0.54297	917.396	921.402	46.094	19.364	0.75775	46.094	45.712	46.47	3.8147e-06		0	0	0	2.3135e-12	2	15564	208.47	208.47	1	97.536	1.4776	0
AVTEQGHELSNEER	14	0	1	Unmodified	_AVTEQGHELSNEER_			0	0	P31946;P31946-2;Q4VY19;Q4VY20	P31946	P31946	YWHAB	14-3-3 protein beta/alpha;14-3-3 protein beta/alpha, N-terminally processed	>sp|P31946|1433B_HUMAN 14-3-3 protein beta/alpha OS=Homo sapiens GN=YWHAB PE=1 SV=3;>sp|P31946-2|1433B_HUMAN Isoform Short of 14-3-3 protein beta/alpha OS=Homo sapiens GN=YWHAB;>tr|Q4VY19|Q4VY19_HUMAN 14-3-3 protein beta/alpha (Fragment) OS=Homo sapiens GN	MULTI-MSMS		JACB153_1	MDA-MB-231 R10K8	536.92	3	533.585	1597.73	47963	0.25359	-0.13803	0.11555	533.585	536.921	15.27	9.0923	0.67305	15.27	15.118	15.791	0		0	0	0	4.3557e-06	1	3529	148.91	148.91	1	97.628	12.674	0
MTDQEAIQDLWQWR	14	0	1	Unmodified	_MTDQEAIQDLWQWR_			0	0	P06748;P06748-2	P06748	P06748	NPM1	Nucleophosmin	>sp|P06748|NPM_HUMAN Nucleophosmin OS=Homo sapiens GN=NPM1 PE=1 SV=2;>sp|P06748-2|NPM_HUMAN Isoform 2 of Nucleophosmin OS=Homo sapiens GN=NPM1	MULTI-MSMS		JACB153_1	MDA-MB-231 R10K8	915.43	2	910.425	1818.84	36694.3	-0.67447	-0.18688	-0.86135	910.424	915.43	71.11	27.703	0.89911	71.11	70.741	71.64	0		0	0	0	8.1478e-16	2	24829	241.42	237.15	1	97.881	12.707	0
PLISVYSEK	9	1	0	Unmodified	_PLISVYSEK_			0	0	P36578;H3BU31;H3BTP7	P36578	P36578	RPL4	60S ribosomal protein L4	>sp|P36578|RL4_HUMAN 60S ribosomal protein L4 OS=Homo sapiens GN=RPL4 PE=1 SV=5;>tr|H3BU31|H3BU31_HUMAN 60S ribosomal protein L4 (Fragment) OS=Homo sapiens GN=RPL4 PE=1 SV=1;>tr|H3BTP7|H3BTP7_HUMAN 60S ribosomal protein L4 (Fragment) OS=Homo sapiens GN=RPL	MULTI-MSMS		JACB153_1	MDA-MB-231 R10K8	522.3	2	518.29	1034.56	49055.1	0.46436	-0.53301	-0.068642	518.291	522.296	35.743	15.916	0.50312	35.743	35.519	36.022	0		0	0	0	0.0016795	1	11506	91.867	44.976	1	97.921	2.3184	0
LISWYDNEFGYSNR	14	0	1	Unmodified	_LISWYDNEFGYSNR_			0	0	P04406;P04406-2;E7EUT5	P04406	P04406	GAPDH	Glyceraldehyde-3-phosphate dehydrogenase	>sp|P04406|G3P_HUMAN Glyceraldehyde-3-phosphate dehydrogenase OS=Homo sapiens GN=GAPDH PE=1 SV=3;>sp|P04406-2|G3P_HUMAN Isoform 2 of Glyceraldehyde-3-phosphate dehydrogenase OS=Homo sapiens GN=GAPDH;>tr|E7EUT5|E7EUT5_HUMAN Glyceraldehyde-3-phosphate dehydr	MULTI-MSMS		JACB153_1	MDA-MB-231 R10K8	887.41	2	882.405	1762.8	36853	-0.99606	0.24111	-0.75494	882.405	887.409	57.982	23.325	1.7823	57.982	57.408	59.191	0		0	0	0	3.5098e-07	3	20107	164.81	161.39	1	98.252	12.755	0
GLFIIDGK	8	1	0	Unmodified	_GLFIIDGK_			0	0	P32119	P32119	P32119	PRDX2	Peroxiredoxin-2	>sp|P32119|PRDX2_HUMAN Peroxiredoxin-2 OS=Homo sapiens GN=PRDX2 PE=1 SV=5	MULTI-MSMS		JACB153_1	MDA-MB-231 R10K8	435.76	2	431.755	861.496	51875.6	0.18259	0.27717	0.45976	431.755	435.762	49.85	20.619	0.76301	49.85	49.6	50.363	3.8147e-06		0	0	0	0.0055593	1	17011	84.568	55.481	1	98.256	1.9923	0
GLGTDEDTIIDIITHR	16	0	1	Unmodified	_GLGTDEDTIIDIITHR_			0	0	A6NN80;E5RK69;P08133;P08133-2	A6NN80;P08133	A6NN80	ANXA6	Annexin;Annexin A6	>tr|A6NN80|A6NN80_HUMAN Annexin OS=Homo sapiens GN=ANXA6 PE=1 SV=3;>tr|E5RK69|E5RK69_HUMAN Annexin OS=Homo sapiens GN=ANXA6 PE=1 SV=1;>sp|P08133|ANXA6_HUMAN Annexin A6 OS=Homo sapiens GN=ANXA6 PE=1 SV=3;>sp|P08133-2|ANXA6_HUMAN Isoform 2 of Annexin A6 OS=H	MULTI-MSMS		JACB153_1	MDA-MB-231 R10K8	593.64	3	590.307	1767.9	44590.1	0.042788	0.25154	0.29433	590.308	593.644	66.495	26.166	0.81805	66.495	66.144	66.962	0		0	0	0	8.396e-06	2	23181	107.07	107.07	1	98.304	12.762	0
FEELNADLFR	10	0	1	Unmodified	_FEELNADLFR_			0	0	P11142;E9PKE3;P11142-2;E9PNE6;E9PN89;A8K7Q2;P54652	P11142;P54652	P11142	HSPA8;HSPA2	Heat shock cognate 71 kDa protein;Heat shock-related 70 kDa protein 2	>sp|P11142|HSP7C_HUMAN Heat shock cognate 71 kDa protein OS=Homo sapiens GN=HSPA8 PE=1 SV=1;>tr|E9PKE3|E9PKE3_HUMAN Heat shock cognate 71 kDa protein OS=Homo sapiens GN=HSPA8 PE=1 SV=1;>sp|P11142-2|HSP7C_HUMAN Isoform 2 of Heat shock cognate 71 kDa protein	MULTI-MSMS		JACB153_1	MDA-MB-231 R10K8	632.32	2	627.312	1252.61	44927.2	-0.43535	0.11707	-0.31828	627.311	632.316	54.865	22.285	0.74992	54.865	54.573	55.323	3.8147e-06		0	0	0	0.00070925	1	18886	129.7	105.85	1	98.594	12.8	0
IMLPWDPTGK	10	1	0	Unmodified	_IMLPWDPTGK_			0	0	P23396;P23396-2;E9PL09;H0YEU2;E9PPU1;E9PSF4	P23396	P23396	RPS3	40S ribosomal protein S3	>sp|P23396|RS3_HUMAN 40S ribosomal protein S3 OS=Homo sapiens GN=RPS3 PE=1 SV=2;>sp|P23396-2|RS3_HUMAN Isoform 2 of 40S ribosomal protein S3 OS=Homo sapiens GN=RPS3;>tr|E9PL09|E9PL09_HUMAN 40S ribosomal protein S3 OS=Homo sapiens GN=RPS3 PE=1 SV=1;>tr|H0YE	MULTI-MSMS		JACB153_1	MDA-MB-231 R10K8	583.31	2	579.305	1156.6	46082.6	0.44504	-0.48644	-0.041408	579.306	583.312	60.624	24.206	0.5792	60.624	60.321	60.9	0		0	0	0	0.0014639	1	20985	93.096	93.096	1	98.613	2.6718	0
VLGLVLLR	8	0	1	Unmodified	_VLGLVLLR_			0	0	P14678-3;B3KVR1;P14678;P63162;P14678-2;J3QLE5	P14678-3	P14678-3	SNRPN;SNRPB	Small nuclear ribonucleoprotein-associated protein;Small nuclear ribonucleoprotein-associated proteins B and B;Small nuclear ribonucleoprotein-associated protein N	>sp|P14678-3|RSMB_HUMAN Isoform SM-B1 of Small nuclear ribonucleoprotein-associated proteins B and B OS=Homo sapiens GN=SNRPB;>tr|B3KVR1|B3KVR1_HUMAN Small nuclear ribonucleoprotein-associated protein OS=Homo sapiens GN=SNRPN PE=2 SV=1;>sp|P14678|RSMB_HUM	MULTI-MSMS		JACB153_1	MDA-MB-231 R10K8	446.81	2	441.81	881.606	51591.2	-0.34081	0.49407	0.15326	441.811	446.815	57.911	23.306	0.51417	57.912	57.678	58.192	3.8147e-06		0	0	0	0.0071603	1	20012	79.469	79.469	1	98.882	12.837	0
VPTANVSVVDLTCR	14	0	1	Unmodified	_VPTANVSVVDLTCR_			0	0	P04406;P04406-2;E7EUT5	P04406	P04406	GAPDH	Glyceraldehyde-3-phosphate dehydrogenase	>sp|P04406|G3P_HUMAN Glyceraldehyde-3-phosphate dehydrogenase OS=Homo sapiens GN=GAPDH PE=1 SV=3;>sp|P04406-2|G3P_HUMAN Isoform 2 of Glyceraldehyde-3-phosphate dehydrogenase OS=Homo sapiens GN=GAPDH;>tr|E7EUT5|E7EUT5_HUMAN Glyceraldehyde-3-phosphate dehydr	MULTI-MSMS		JACB153_1	MDA-MB-231 R10K8	770.9	2	765.901	1529.79	39834.9	-0.54442	-0.33248	-0.8769	765.902	770.905	45.859	19.283	0.9159	45.859	45.611	46.527	0		0	0	0	1.0399e-15	3	15626	238.88	230.91	1	98.907	12.84	0
ALLELQLEPEELYQTFQR	18	0	1	Unmodified	_ALLELQLEPEELYQTFQR_			0	0	P13639	P13639	P13639	EEF2	Elongation factor 2	>sp|P13639|EF2_HUMAN Elongation factor 2 OS=Homo sapiens GN=EEF2 PE=1 SV=4	MULTI-MSMS		JACB153_1	MDA-MB-231 R10K8	744.39	3	740.723	2219.15	40530.3	-0.29467	0.16288	-0.13179	741.057	744.394	78.459	30.155	0.62573	78.459	78.184	78.81	0		0	0	0	7.3964e-13	2	27458	161.14	161.14	1	99.005	12.853	0
YMACCLLYR	9	0	1	Unmodified	_YMACCLLYR_			0	0	Q71U36;Q71U36-2;F5H5D3;Q9BQE3;P68366;A8MUB1;P68363;CON__ENSEMBL:ENSBTAP00000016242;A6NHL2;A6NHL2-2	Q71U36;F5H5D3;P68366;P68363;A6NHL2	P68363	TUBA1A;TUBA1C;TUBA4A;TUBA1B;TUBAL3	Tubulin alpha-1A chain;Tubulin alpha-1C chain;Tubulin alpha-4A chain;Tubulin alpha-1B chain;Tubulin alpha chain-like 3	>sp|Q71U36|TBA1A_HUMAN Tubulin alpha-1A chain OS=Homo sapiens GN=TUBA1A PE=1 SV=1;>sp|Q71U36-2|TBA1A_HUMAN Isoform 2 of Tubulin alpha-1A chain OS=Homo sapiens GN=TUBA1A;>tr|F5H5D3|F5H5D3_HUMAN Tubulin alpha-1C chain OS=Homo sapiens GN=TUBA1C PE=1 SV=1;>sp|	MULTI-MSMS		JACB153_1	MDA-MB-231 R10K8	630.28	2	625.28	1248.55	43551.7	-0.2428	-0.89143	-1.1342	625.28	630.284	42.867	18.292	0.71334	42.867	42.578	43.292	0		0	0	0	0.0015144	2	14312	92.439	68.148	1	100.68	13.071	0
NQGGYGGSSSSSSYGSGR	18	0	1	Unmodified	_NQGGYGGSSSSSSYGSGR_			0	0	P09651;P09651-2;F8W6I7;P09651-3;H0YH80	P09651	P09651	HNRNPA1	Heterogeneous nuclear ribonucleoprotein A1	>sp|P09651|ROA1_HUMAN Heterogeneous nuclear ribonucleoprotein A1 OS=Homo sapiens GN=HNRNPA1 PE=1 SV=5;>sp|P09651-2|ROA1_HUMAN Isoform A1-A of Heterogeneous nuclear ribonucleoprotein A1 OS=Homo sapiens GN=HNRNPA1;>tr|F8W6I7|F8W6I7_HUMAN Heterogeneous nuclea	MULTI-MSMS		JACB153_1	MDA-MB-231 R10K8	852.86	2	847.854	1693.69	38388.2	-0.67706	0.21139	-0.46567	848.359	852.858	15.693	9.2272	0.67246	15.693	15.415	16.088	0		0	0	0	3.4981e-08	1	3673	123.63	123.63	1	101.82	13.218	0
DLYANTVLSGGTTMYPGIADR	21	0	1	Unmodified	_DLYANTVLSGGTTMYPGIADR_			0	0	CON__P60712;P60709;P63261	CON__P60712;P63261	CON__P60712	ACTB;ACTG1	Actin, cytoplasmic 1;Actin, cytoplasmic 1, N-terminally processed;Actin, cytoplasmic 2;Actin, cytoplasmic 2, N-terminally processed	>P60712 SWISS-PROT:P60712 (Bos taurus) Actin, cytoplasmic 1;>sp|P60709|ACTB_HUMAN Actin, cytoplasmic 1 OS=Homo sapiens GN=ACTB PE=1 SV=1;>sp|P63261|ACTG_HUMAN Actin, cytoplasmic 2 OS=Homo sapiens GN=ACTG1 PE=1 SV=1	MULTI-MSMS		JACB153_1	MDA-MB-231 R10K8	1113.54	2	1108.04	2214.06	33181.2	-0.30688	-0.75461	-1.0615	1108.54	1113.54	64.608	25.533	1.3902	64.608	64.328	65.718	0		0	0	0	3.7346e-26	3	22520	229.46	222.47	1	102.38	13.292	0
LVIITAGAR	9	0	1	Unmodified	_LVIITAGAR_			0	0	P00338-3;P00338;P00338-2;P00338-5;F5GXY2;F5GYU2;F5GXH2;Q6ZMR3	P00338-3	P00338-3	LDHA;LDHAL6A	L-lactate dehydrogenase A chain;L-lactate dehydrogenase A-like 6A	>sp|P00338-3|LDHA_HUMAN Isoform 3 of L-lactate dehydrogenase A chain OS=Homo sapiens GN=LDHA;>sp|P00338|LDHA_HUMAN L-lactate dehydrogenase A chain OS=Homo sapiens GN=LDHA PE=1 SV=2;>sp|P00338-2|LDHA_HUMAN Isoform 2 of L-lactate dehydrogenase A chain OS=Hom	MULTI-MSMS		JACB153_1	MDA-MB-231 R10K8	462.3	2	457.295	912.576	51596.5	-0.40367	-0.30795	-0.71162	457.296	462.299	34.508	15.503	1.0656	34.508	34.262	35.328	0		0	0	0	0.0039631	3	10988	83.948	8.8385	1	102.5	13.307	0
SYELPDGQVITIGNER	16	0	1	Unmodified	_SYELPDGQVITIGNER_			0	0	CON__P60712;P60709;Q6S8J3;A5A3E0;Q9BYX7;Q562R1;P68032;P68133;P62736;P63267;A6NL76;Q5T8M8;Q5T8M7;P63267-2;P63261	CON__P60712;P68032;P63261	CON__P60712	ACTB;POTEE;POTEF;POTEKP;ACTBL2;ACTC1;ACTA1;ACTA2;ACTG2;ACTG1	Actin, cytoplasmic 1;Actin, cytoplasmic 1, N-terminally processed;POTE ankyrin domain family member E;POTE ankyrin domain family member F;Putative beta-actin-like protein 3;Beta-actin-like protein 2;Actin, alpha cardiac muscle 1;Actin, alpha skeletal muscle;Actin, aortic smooth muscle;Actin, gamma-enteric smooth muscle;Actin, cytoplasmic 2;Actin, cytoplasmic 2, N-terminally processed	>P60712 SWISS-PROT:P60712 (Bos taurus) Actin, cytoplasmic 1;>sp|P60709|ACTB_HUMAN Actin, cytoplasmic 1 OS=Homo sapiens GN=ACTB PE=1 SV=1;>sp|Q6S8J3|POTEE_HUMAN POTE ankyrin domain family member E OS=Homo sapiens GN=POTEE PE=1 SV=3;>sp|A5A3E0|POTEF_HUMAN PO	MULTI-MSMS		JACB153_1	MDA-MB-231 R10K8	900.95	2	895.95	1789.88	36552.2	-0.78421	0.075474	-0.70873	896.453	900.954	55.368	22.46	1.0921	55.368	54.869	55.961	0		0	0	0	1.5795e-06	4	19135	122.1	122.1	1	103.26	13.406	0
STAGDTHLGGEDFDNR	16	0	1	Unmodified	_STAGDTHLGGEDFDNR_			0	0	P11142;E9PKE3;P11142-2;E9PN89;P54652	P11142;P54652	P11142	HSPA8;HSPA2	Heat shock cognate 71 kDa protein;Heat shock-related 70 kDa protein 2	>sp|P11142|HSP7C_HUMAN Heat shock cognate 71 kDa protein OS=Homo sapiens GN=HSPA8 PE=1 SV=1;>tr|E9PKE3|E9PKE3_HUMAN Heat shock cognate 71 kDa protein OS=Homo sapiens GN=HSPA8 PE=1 SV=1;>sp|P11142-2|HSP7C_HUMAN Isoform 2 of Heat shock cognate 71 kDa protein	MULTI-MSMS		JACB153_1	MDA-MB-231 R10K8	567.92	3	564.58	1690.72	46656.2	-0.085365	0.37054	0.28517	564.58	567.916	24.084	12.031	0.75279	24.084	23.859	24.611	0		0	0	0	8.0554e-06	1	6821	107.82	102.17	1	103.81	13.477	0
EQFLDGDGWTSR	12	0	1	Unmodified	_EQFLDGDGWTSR_			0	0	P27797;K7EJB9	P27797	P27797	CALR	Calreticulin	>sp|P27797|CALR_HUMAN Calreticulin OS=Homo sapiens GN=CALR PE=1 SV=1;>tr|K7EJB9|K7EJB9_HUMAN Calreticulin (Fragment) OS=Homo sapiens GN=CALR PE=1 SV=1	MULTI-MSMS		JACB153_1	MDA-MB-231 R10K8	710.82	2	705.818	1409.62	41534.5	-0.07936	-0.36316	-0.44252	706.319	710.822	46.732	19.573	1.1144	46.732	46.209	47.323	0		0	0	0	0.0001522	2	15814	120.87	120.87	1	104.38	13.551	0
LLCGLLAER	9	0	1	Unmodified	_LLCGLLAER_			0	0	P14174	P14174	P14174	MIF	Macrophage migration inhibitory factor	>sp|P14174|MIF_HUMAN Macrophage migration inhibitory factor OS=Homo sapiens GN=MIF PE=1 SV=4	MULTI-MSMS		JACB153_1	MDA-MB-231 R10K8	527.8	2	522.797	1043.58	48077.5	0.45425	-0.44852	0.0057315	522.797	527.801	46.851	19.614	0.92549	46.851	46.586	47.512	0		0	0	0	0.00092733	3	15861	105.4	40.144	1	104.87	13.614	0
IFGVTTLDIVR	11	0	1	Unmodified	_IFGVTTLDIVR_			0	0	P40926;G3XAL0	P40926	P40926	MDH2	Malate dehydrogenase, mitochondrial;Malate dehydrogenase	>sp|P40926|MDHM_HUMAN Malate dehydrogenase, mitochondrial OS=Homo sapiens GN=MDH2 PE=1 SV=3;>tr|G3XAL0|G3XAL0_HUMAN Malate dehydrogenase OS=Homo sapiens GN=MDH2 PE=1 SV=1	MULTI-MSMS		JACB153_1	MDA-MB-231 R10K8	622.37	2	617.364	1232.71	44836.6	-0.15672	0.24362	0.086899	617.365	622.368	61.44	24.477	0.52948	61.44	61.208	61.737	3.8147e-06		0	0	0	0.00069791	1	21271	101.93	93.624	1	105.37	13.679	0
VFSGLVSTGLK	11	1	0	Unmodified	_VFSGLVSTGLK_			0	0	P13639	P13639	P13639	EEF2	Elongation factor 2	>sp|P13639|EF2_HUMAN Elongation factor 2 OS=Homo sapiens GN=EEF2 PE=1 SV=4	MULTI-MSMS		JACB153_1	MDA-MB-231 R10K8	558.33	2	554.324	1106.63	46446.7	0.16526	0.043868	0.20913	554.323	558.331	43.739	18.581	0.85298	43.739	43.345	44.198	0		0	0	0	0.012509	1	14659	66.267	66.267	1	105.7	1.7329	0
VAALQNLVK	9	1	0	Unmodified	_VAALQNLVK_			0	0	Q14974;Q14974-2;J3KTM9;F5H4R7	Q14974	Q14974	KPNB1	Importin subunit beta-1	>sp|Q14974|IMB1_HUMAN Importin subunit beta-1 OS=Homo sapiens GN=KPNB1 PE=1 SV=2;>sp|Q14974-2|IMB1_HUMAN Isoform 2 of Importin subunit beta-1 OS=Homo sapiens GN=KPNB1;>tr|J3KTM9|J3KTM9_HUMAN Importin subunit beta-1 (Fragment) OS=Homo sapiens GN=KPNB1 PE=1	MULTI-MSMS		JACB153_1	MDA-MB-231 R10K8	482.31	2	478.3	954.586	50460.8	0.26064	0.097493	0.35813	478.301	482.307	36.117	16.042	0.50851	36.117	35.914	36.423	-3.8147e-06		0	0	0	0.00085508	1	11664	110.12	64.114	1	106.02	2.5023	0
DITYFIQQLLR	11	0	1	Unmodified	_DITYFIQQLLR_			0	0	P61158;B4DXW1;F5H3P5;Q9P1U1;Q9P1U1-3;Q9P1U1-2;C9IZN3;Q9C0K3;H7C4J1	P61158	P61158	ACTR3;ACTR3B;ACTR3C	Actin-related protein 3;Actin-related protein 3B;Actin-related protein 3C	>sp|P61158|ARP3_HUMAN Actin-related protein 3 OS=Homo sapiens GN=ACTR3 PE=1 SV=3;>tr|B4DXW1|B4DXW1_HUMAN Actin-related protein 3 OS=Homo sapiens GN=ACTR3 PE=1 SV=1;>tr|F5H3P5|F5H3P5_HUMAN Actin-related protein 3 OS=Homo sapiens GN=ACTR3 PE=1 SV=1;>sp|Q9P1U	MULTI-MSMS		JACB153_1	MDA-MB-231 R10K8	710.4	2	705.393	1408.77	41742.9	-0.095779	0.15462	0.058839	705.393	710.397	97.321	62.653	0.60333	97.321	96.991	97.594	0		0	0	0	0.0041402	2	33743	85.958	66.826	1	107.67	13.978	0
ALTSELANAR	10	0	1	Unmodified	_ALTSELANAR_			0	0	P26038	P26038	P26038	MSN	Moesin	>sp|P26038|MOES_HUMAN Moesin OS=Homo sapiens GN=MSN PE=1 SV=3	MULTI-MSMS		JACB153_1	MDA-MB-231 R10K8	528.29	2	523.285	1044.56	47703.8	-0.096398	-0.18893	-0.28533	523.287	528.29	27.45	13.15	0.66482	27.45	27.234	27.899	0		0	0	0	0.0011515	1	8170	100.48	100.48	1	112.9	14.657	0
IALTDNALIAR	11	0	1	Unmodified	_IALTDNALIAR_			0	0	P18124;A8MUD9	P18124	P18124	RPL7	60S ribosomal protein L7	>sp|P18124|RL7_HUMAN 60S ribosomal protein L7 OS=Homo sapiens GN=RPL7 PE=1 SV=1;>tr|A8MUD9|A8MUD9_HUMAN 60S ribosomal protein L7 OS=Homo sapiens GN=RPL7 PE=1 SV=1	MULTI-MSMS		JACB153_1	MDA-MB-231 R10K8	590.85	2	585.846	1169.68	44182.9	-0.0087648	0.016783	0.0080179	585.845	590.85	45.41	19.134	0.34356	45.41	45.213	45.557	0		0	0	0	0.00051484	1	15336	119.76	52.038	1	127.25	16.519	0
SPAGLQVLNDYLADK	15	1	0	Unmodified	_SPAGLQVLNDYLADK_			0	0	P24534;C9JZW3;F2Z2G2;F8WF65	P24534	P24534	EEF1B2	Elongation factor 1-beta	>sp|P24534|EF1B_HUMAN Elongation factor 1-beta OS=Homo sapiens GN=EEF1B2 PE=1 SV=3;>tr|C9JZW3|C9JZW3_HUMAN Elongation factor 1-beta (Fragment) OS=Homo sapiens GN=EEF1B2 PE=1 SV=1;>tr|F2Z2G2|F2Z2G2_HUMAN Elongation factor 1-beta OS=Homo sapiens GN=EEF1B2 PE	MULTI-MSMS		JACB153_1	MDA-MB-231 R10K8	806.43	2	802.42	1602.83	39595.7	-0.3276	-0.12326	-0.45086	802.419	806.427	60.592	24.196	0.61893	60.592	60.26	60.879	0		0	0	0	3.7733e-17	2	21079	230.38	230.38	1	128.57	2.2448	0
LSYTQLLR	8	0	1	Unmodified	_LSYTQLLR_			0	0	Q15149-4;Q15149;Q15149-2;Q15149-6;Q15149-5;Q15149-9;Q15149-8;Q15149-7;Q15149-3	Q15149-4	Q15149-4	PLEC	Plectin	>sp|Q15149-4|PLEC_HUMAN Isoform 4 of Plectin OS=Homo sapiens GN=PLEC;>sp|Q15149|PLEC_HUMAN Plectin OS=Homo sapiens GN=PLEC PE=1 SV=3;>sp|Q15149-2|PLEC_HUMAN Isoform 2 of Plectin OS=Homo sapiens GN=PLEC;>sp|Q15149-6|PLEC_HUMAN Isoform 6 of Plectin OS=Homo s	MULTI-MSMS		JACB153_1	MDA-MB-231 R10K8	502.29	2	497.29	992.565	48679.9	0.093887	0.050554	0.14444	497.29	502.294	44.957	18.989	0.43989	44.957	44.752	45.192	0		0	0	0	0.0027944	1	15137	93.374	44.58	1	129.07	16.756	0
VLTEIIASR	9	0	1	Unmodified	_VLTEIIASR_			0	0	P08758;D6RBL5;E9PHT9	P08758	P08758	ANXA5	Annexin A5;Annexin	>sp|P08758|ANXA5_HUMAN Annexin A5 OS=Homo sapiens GN=ANXA5 PE=1 SV=2;>tr|D6RBL5|D6RBL5_HUMAN Annexin OS=Homo sapiens GN=ANXA5 PE=1 SV=1;>tr|E9PHT9|E9PHT9_HUMAN Annexin OS=Homo sapiens GN=ANXA5 PE=1 SV=1	MULTI-MSMS		JACB153_1	MDA-MB-231 R10K8	506.31	2	501.303	1000.59	49736.5	0.36794	0.24716	0.6151	501.804	506.307	37.763	16.591	0.5356	37.763	37.534	38.069	-3.8147e-06		0	0	0	0.00058182	1	12316	127.4	127.4	1	135.58	17.602	0
TATESFASDPILYRPVAVALDTK	23	1	1	Unmodified	_TATESFASDPILYRPVAVALDTK_			0	0	P14618;P14618-3;H3BQ34;H3BTJ2;H3BUW1;H3BT25;P14618-2;H3BTN5	P14618;P14618-2	P14618	PKM2	Pyruvate kinase isozymes M1/M2;Pyruvate kinase	>sp|P14618|KPYM_HUMAN Pyruvate kinase PKM OS=Homo sapiens GN=PKM PE=1 SV=4;>sp|P14618-3|KPYM_HUMAN Isoform 3 of Pyruvate kinase PKM OS=Homo sapiens GN=PKM;>tr|H3BQ34|H3BQ34_HUMAN Pyruvate kinase OS=Homo sapiens GN=PKM PE=1 SV=1;>tr|H3BTJ2|H3BTJ2_HUMAN Pyru	MULTI-MSMS		JACB153_1	MDA-MB-231 R10K8	828.78	3	822.436	2464.28	38139.6	-0.24263	-0.44007	-0.68269	822.77	828.777	59.811	23.938	1.0941	59.811	59.421	60.515	0		0	0	0	1.1012e-11	2	20775	146.99	146.99	1	141.92	209.15	0
FLPLFDR	7	0	1	Unmodified	_FLPLFDR_			0	0	P61604;B8ZZL8;S4R3N1	P61604	P61604	HSPE1	10 kDa heat shock protein, mitochondrial	>sp|P61604|CH10_HUMAN 10 kDa heat shock protein, mitochondrial OS=Homo sapiens GN=HSPE1 PE=1 SV=2;>tr|B8ZZL8|B8ZZL8_HUMAN 10 kDa heat shock protein, mitochondrial OS=Homo sapiens GN=HSPE1 PE=1 SV=1;>tr|S4R3N1|S4R3N1_HUMAN Protein HSPE1-MOB4 OS=Homo sapiens	MULTI-MSMS		JACB153_1	MDA-MB-231 R10K8	459.26	2	454.255	906.496	51870.2	-0.028035	-0.027297	-0.055332	454.255	459.26	55.666	22.557	0.86029	55.666	55.433	56.293	0		0	0	0	0.0071	2	19191	102.72	58.108	1	142.15	18.454	0
GHLENNPALEK	11	1	0	Unmodified	_GHLENNPALEK_			0	0	P05388;Q8NHW5;F8VWS0;Q3B7A4;F8VU65;F8VW21;G3V210;F8VPE8;F8VRK7;F8VQY6;F8VZS0;F8VS58;F8VWV4	P05388	P05388	RPLP0;RPLP0P6	60S acidic ribosomal protein P0;60S acidic ribosomal protein P0-like	>sp|P05388|RLA0_HUMAN 60S acidic ribosomal protein P0 OS=Homo sapiens GN=RPLP0 PE=1 SV=1;>sp|Q8NHW5|RLA0L_HUMAN 60S acidic ribosomal protein P0-like OS=Homo sapiens GN=RPLP0P6 PE=5 SV=1;>tr|F8VWS0|F8VWS0_HUMAN 60S acidic ribosomal protein P0 OS=Homo sapien	MULTI-MSMS		JACB153_1	MDA-MB-231 R10K8	410.55	3	407.879	1220.61	54499.6	0.048084	-0.21408	-0.16599	407.879	410.55	15.373	9.1229	0.49169	15.373	15.241	15.733	0		0	0	0	0.0097952	1	3574	72.652	72.652	1	144.45	4.0281	0
ATAPQTQHVSPMR	13	0	1	Unmodified	_ATAPQTQHVSPMR_			0	0	P29692-3;E9PQZ1;E9PL71;E9PRY8;P29692-2;P29692;E9PK01;P29692-4;E9PI39;E9PQ49;E9PL12;E9PPR1;E9PK06	P29692-3;E9PRY8	E9PRY8	EEF1D	Elongation factor 1-delta	>sp|P29692-3|EF1D_HUMAN Isoform 3 of Elongation factor 1-delta OS=Homo sapiens GN=EEF1D;>tr|E9PQZ1|E9PQZ1_HUMAN Elongation factor 1-delta OS=Homo sapiens GN=EEF1D PE=1 SV=1;>tr|E9PL71|E9PL71_HUMAN Elongation factor 1-delta (Fragment) OS=Homo sapiens GN=EEF	MULTI-MSMS		JACB153_1	MDA-MB-231 R10K8	478.58	3	475.242	1422.7	49450.8	0.25828	-0.39756	-0.13927	475.576	478.578	16.107	9.3705	0.53494	16.107	15.951	16.486	-1.9073e-06		0	0	0	1.6821e-05	1	3833	149.26	149.26	1	165.75	21.518	0
AAAAAAGAASGLPGPVAQGLK	21	1	0	Acetyl (Protein N-term)	_(ac)AAAAAAGAASGLPGPVAQGLK_			1	0	Q96P70	Q96P70	Q96P70	IPO9	Importin-9	>sp|Q96P70|IPO9_HUMAN Importin-9 OS=Homo sapiens GN=IPO9 PE=1 SV=3	ISO-MSMS	1	JACB153_1	MDA-MB-231 R10K8	900	2	895.992	1789.97	NaN	NaN	-0.31585	NaN	NaN	NaN	61.362	24.452	0.31291	61.362	61.208	61.521	0		0	0	0	3.6042e-22	1	21284	160.25	153.52	1	NaN	NaN	0
AAAAAAVGPGAGGAGSAVPGGAGPCATVSVFPGAR	35	0	1	Acetyl (Protein N-term)	_(ac)AAAAAAVGPGAGGAGSAVPGGAGPCATVSVFPGAR_			1	0	Q86X55;Q86X55-1;Q86X55-2;K7EPK1;K7EK20	Q86X55	Q86X55	CARM1	Histone-arginine methyltransferase CARM1	>sp|Q86X55|CARM1_HUMAN Histone-arginine methyltransferase CARM1 OS=Homo sapiens GN=CARM1 PE=1 SV=3;>sp|Q86X55-1|CARM1_HUMAN Isoform 1 of Histone-arginine methyltransferase CARM1 OS=Homo sapiens GN=CARM1;>sp|Q86X55-2|CARM1_HUMAN Isoform 2 of Histone-arginin	ISO-MSMS	1	JACB153_1	MDA-MB-231 R10K8	987.5	3	983.826	2948.46	NaN	NaN	0.43814	NaN	NaN	NaN	67.142	26.383	0.33315	67.142	66.941	67.275	0		0	0	0	9.7623e-19	1	23378	111.24	106.34	1	NaN	NaN	0
AAAAAEQQQFYLLLGNLLSPDNVVR	25	0	1	Acetyl (Protein N-term)	_(ac)AAAAAEQQQFYLLLGNLLSPDNVVR_			1	0	O00410-3;O00410;B4E0R6;E7ETV3;E7EV12;E7EQT5;E7EX05;E7EWK4;E7ETV8;E7ESZ1;E7ESA1;C9JQT6;C9J875;C9JZD8;C9JXE0	O00410-3	O00410-3	IPO5	Importin-5	>sp|O00410-3|IPO5_HUMAN Isoform 3 of Importin-5 OS=Homo sapiens GN=IPO5;>sp|O00410|IPO5_HUMAN Importin-5 OS=Homo sapiens GN=IPO5 PE=1 SV=4;>tr|B4E0R6|B4E0R6_HUMAN Importin-5 OS=Homo sapiens GN=IPO5 PE=1 SV=1;>tr|E7ETV3|E7ETV3_HUMAN Importin-5 (Fragment) OS	ISO-MSMS	1	JACB153_1	MDA-MB-231 R10K8	918.82	3	915.152	2742.43	NaN	NaN	-0.15568	NaN	NaN	NaN	102.61	96.48	0.30299	102.61	102.53	102.83	0		0	0	0	1.2571e-20	1	35435	141.53	138.6	1	NaN	NaN	0
AAAASAAEAGIATTGTEDSDDALLK	25	1	0	Unmodified	_AAAASAAEAGIATTGTEDSDDALLK_			0	0	P55036;A2A3N6;H0Y3Y9	P55036	P55036	PSMD4;PIPSL	26S proteasome non-ATPase regulatory subunit 4;Putative PIP5K1A and PSMD4-like protein	>sp|P55036|PSMD4_HUMAN 26S proteasome non-ATPase regulatory subunit 4 OS=Homo sapiens GN=PSMD4 PE=1 SV=1;>sp|A2A3N6|PIPSL_HUMAN Putative PIP5K1A and PSMD4-like protein OS=Homo sapiens GN=PIPSL PE=5 SV=1;>tr|H0Y3Y9|H0Y3Y9_HUMAN 26S proteasome non-ATPase reg	ISO-MSMS	1	JACB153_1	MDA-MB-231 R10K8	777.05	3	774.043	2319.11	NaN	NaN	-0.18438	NaN	NaN	NaN	45.777	19.257	0.29148	45.777	45.611	45.903	0		0	0	0	4.8664e-22	1	15518	155.76	146.96	1	NaN	NaN	0
AAAAVSESWPELELAER	17	0	1	Acetyl (Protein N-term)	_(ac)AAAAVSESWPELELAER_			1	0	Q8N1G4	Q8N1G4	Q8N1G4	LRRC47	Leucine-rich repeat-containing protein 47	>sp|Q8N1G4|LRC47_HUMAN Leucine-rich repeat-containing protein 47 OS=Homo sapiens GN=LRRC47 PE=1 SV=1	ISO-MSMS	1	JACB153_1	MDA-MB-231 R10K8	941.47	2	935.963	1869.91	NaN	NaN	0.11901	NaN	NaN	NaN	78.065	30.019	0.45469	78.065	77.825	78.279	0		0	0	0	8.2372e-06	1	27237	105.31	96.669	1	NaN	NaN	0
AAAAVVEFQR	10	0	1	Acetyl (Protein N-term)	_(ac)AAAAVVEFQR_			1	0	O00231-2;O00231;J3QRY4	O00231-2	O00231-2	PSMD11	26S proteasome non-ATPase regulatory subunit 11	>sp|O00231-2|PSD11_HUMAN Isoform 2 of 26S proteasome non-ATPase regulatory subunit 11 OS=Homo sapiens GN=PSMD11;>sp|O00231|PSD11_HUMAN 26S proteasome non-ATPase regulatory subunit 11 OS=Homo sapiens GN=PSMD11 PE=1 SV=3;>tr|J3QRY4|J3QRY4_HUMAN 26S proteasom	ISO-MSMS	1	JACB153_1	MDA-MB-231 R10K8	557.3	2	552.296	1102.58	NaN	NaN	1.1568	NaN	NaN	NaN	55.659	22.557	0.61917	55.659	55.433	56.052	0		0	0	0	0.00024846	1	19195	130.66	109.28	1	NaN	NaN	0
AAAAVVVPAEWIK	13	1	0	Acetyl (Protein N-term)	_(ac)AAAAVVVPAEWIK_			1	0	Q8NI27;F2Z2V2	Q8NI27	Q8NI27	THOC2	THO complex subunit 2	>sp|Q8NI27|THOC2_HUMAN THO complex subunit 2 OS=Homo sapiens GN=THOC2 PE=1 SV=2;>tr|F2Z2V2|F2Z2V2_HUMAN THO complex subunit 2 OS=Homo sapiens GN=THOC2 PE=2 SV=1	ISO-MSMS	1	JACB153_1	MDA-MB-231 R10K8	687.9	2	683.89	1365.77	NaN	NaN	0.27265	NaN	NaN	NaN	78.556	30.189	0.38691	78.556	78.361	78.748	0		0	0	0	0.00079848	1	27412	72.089	72.089	1	NaN	NaN	0
AAADGDDSLYPIAVLIDELR	20	0	1	Acetyl (Protein N-term)	_(ac)AAADGDDSLYPIAVLIDELR_			1	0	P30153;C9J9C1;M0R0K6;M0QXG4	P30153	P30153	PPP2R1A	Serine/threonine-protein phosphatase 2A 65 kDa regulatory subunit A alpha isoform	>sp|P30153|2AAA_HUMAN Serine/threonine-protein phosphatase 2A 65 kDa regulatory subunit A alpha isoform OS=Homo sapiens GN=PPP2R1A PE=1 SV=4;>tr|C9J9C1|C9J9C1_HUMAN Serine/threonine-protein phosphatase 2A 65 kDa regulatory subunit A alpha isoform (Fragment	ISO-MSMS	1	JACB153_1	MDA-MB-231 R10K8	1085.55	2	1080.05	2158.08	NaN	NaN	-0.16086	NaN	NaN	NaN	102.95	98.7	0.21275	102.95	102.87	103.08	0		0	0	0	3.936e-30	1	35548	184.8	179.69	1	NaN	NaN	0
AAAEDVNVTFEDQQK	15	1	0	Unmodified	_AAAEDVNVTFEDQQK_			0	0	E9PQY2;Q9NQP4	E9PQY2	E9PQY2	PFDN4	Prefoldin subunit 4	>tr|E9PQY2|E9PQY2_HUMAN Prefoldin subunit 4 OS=Homo sapiens GN=PFDN4 PE=1 SV=1;>sp|Q9NQP4|PFD4_HUMAN Prefoldin subunit 4 OS=Homo sapiens GN=PFDN4 PE=1 SV=1	ISO-MSMS	1	JACB153_1	MDA-MB-231 R10K8	836.9	2	832.892	1663.77	NaN	NaN	0.88511	NaN	NaN	NaN	33.687	15.226	0.26603	33.687	33.576	33.842	0		0	0	0	2.937e-18	1	10704	173.44	160.95	1	NaN	NaN	0
AAAEEEPKPK	10	2	0	Acetyl (Protein N-term)	_(ac)AAAEEEPKPK_			1	0	P55263;P55263-3	P55263	P55263	ADK	Adenosine kinase	>sp|P55263|ADK_HUMAN Adenosine kinase OS=Homo sapiens GN=ADK PE=1 SV=2;>sp|P55263-3|ADK_HUMAN Isoform 3 of Adenosine kinase OS=Homo sapiens GN=ADK	ISO-MSMS	1	JACB153_1	MDA-MB-231 R10K8	564.3	2	556.285	1110.56	NaN	NaN	0.16701	NaN	NaN	NaN	16.454	9.4808	0.22588	16.454	16.302	16.528	0		0	0	0	0.0022105	1	3972	88.495	71.265	1	NaN	NaN	0
AAAEVNQDYGLDPK	14	1	0	Unmodified	_AAAEVNQDYGLDPK_			0	0	P07954;P07954-2	P07954	P07954	FH	Fumarate hydratase, mitochondrial	>sp|P07954|FUMH_HUMAN Fumarate hydratase, mitochondrial OS=Homo sapiens GN=FH PE=1 SV=3;>sp|P07954-2|FUMH_HUMAN Isoform Cytoplasmic of Fumarate hydratase, mitochondrial OS=Homo sapiens GN=FH	ISO-MSMS	1	JACB153_1	MDA-MB-231 R10K8	749.87	2	745.86	1489.7	NaN	NaN	0.23681	NaN	NaN	NaN	30.93	14.309	0.57035	30.93	30.648	31.219	0		0	0	0	1.79e-05	1	9571	105	101.06	1	NaN	NaN	0
AAAFEEQENETVVVK	15	1	0	Unmodified	_AAAFEEQENETVVVK_			0	0	Q9Y490;Q5TCU6	Q9Y490	Q9Y490	TLN1	Talin-1	>sp|Q9Y490|TLN1_HUMAN Talin-1 OS=Homo sapiens GN=TLN1 PE=1 SV=3;>tr|Q5TCU6|Q5TCU6_HUMAN Talin-1 OS=Homo sapiens GN=TLN1 PE=1 SV=1	ISO-MSMS	1	JACB153_1	MDA-MB-231 R10K8	836.42	2	832.412	1662.81	NaN	NaN	0.25184	NaN	NaN	NaN	34.304	15.435	0.34509	34.304	34.15	34.495	3.8147e-06		0	0	0	4.004e-06	1	10971	119.01	107.1	1	NaN	NaN	0
AAAFEQLQK	9	1	0	Unmodified	_AAAFEQLQK_			0	0	O94826	O94826	O94826	TOMM70A	Mitochondrial import receptor subunit TOM70	>sp|O94826|TOM70_HUMAN Mitochondrial import receptor subunit TOM70 OS=Homo sapiens GN=TOMM70A PE=1 SV=1	ISO-MSMS	1	JACB153_1	MDA-MB-231 R10K8	507.28	2	503.272	1004.53	NaN	NaN	0.95715	NaN	NaN	NaN	26.423	12.808	0.28723	26.423	26.247	26.534	0		0	0	0	0.00029129	1	7797	118.33	87.03	1	NaN	NaN	0
AAAFVTSPPLSPDPTTPDFLNSLLSCGDLQVTGSAHCTFNTAQK	44	1	0	Unmodified	_AAAFVTSPPLSPDPTTPDFLNSLLSCGDLQVTGSAHCTFNTAQK_			0	0	Q16555;Q16555-2	Q16555	Q16555	DPYSL2	Dihydropyrimidinase-related protein 2	>sp|Q16555|DPYL2_HUMAN Dihydropyrimidinase-related protein 2 OS=Homo sapiens GN=DPYSL2 PE=1 SV=1;>sp|Q16555-2|DPYL2_HUMAN Isoform 2 of Dihydropyrimidinase-related protein 2 OS=Homo sapiens GN=DPYSL2	ISO-MSMS	1	JACB153_1	MDA-MB-231 R10K8	1161.82	4	1159.31	4633.21	NaN	NaN	0.33196	NaN	NaN	NaN	79.506	30.504	0.62653	79.506	79.19	79.817	0		0	0	0	2.4691e-05	1	27755	50.832	49.976	1	NaN	NaN	0
AAALEFLNR	9	0	1	Unmodified	_AAALEFLNR_			0	0	P31948;G3XAD8;F5H783;F5GXD8	P31948	P31948	STIP1	Stress-induced-phosphoprotein 1	>sp|P31948|STIP1_HUMAN Stress-induced-phosphoprotein 1 OS=Homo sapiens GN=STIP1 PE=1 SV=1;>tr|G3XAD8|G3XAD8_HUMAN Stress-induced-phosphoprotein 1 OS=Homo sapiens GN=STIP1 PE=1 SV=1;>tr|F5H783|F5H783_HUMAN Stress-induced-phosphoprotein 1 OS=Homo sapiens GN=	ISO-MSMS	1	JACB153_1	MDA-MB-231 R10K8	507.78	2	502.78	1003.55	NaN	NaN	0.18033	NaN	NaN	NaN	44.537	18.851	0.44977	44.537	44.285	44.735	0		0	0	0	0.0015957	1	15010	87.308	71.105	1	NaN	NaN	0
AAAPAPEEEMDECEQALAAEPK	22	1	0	Unmodified	_AAAPAPEEEMDECEQALAAEPK_			0	0	P26641;B4DTG2	P26641	P26641	EEF1G	Elongation factor 1-gamma	>sp|P26641|EF1G_HUMAN Elongation factor 1-gamma OS=Homo sapiens GN=EEF1G PE=1 SV=3;>tr|B4DTG2|B4DTG2_HUMAN Elongation factor 1-gamma OS=Homo sapiens GN=EEF1G PE=1 SV=1	ISO-MSMS	1	JACB153_1	MDA-MB-231 R10K8	1183.53	2	1179.02	2356.02	NaN	NaN	-0.45202	NaN	NaN	NaN	46.815	19.605	0.84455	46.815	46.417	47.261	3.8147e-06		0	0	0	6.5551e-18	2	15853	152.06	148.6	1	NaN	NaN	0
AAAPAPEEEMDECEQALAAEPK	22	1	0	Unmodified	_AAAPAPEEEMDECEQALAAEPK_			0	0	P26641;B4DTG2	P26641	P26641	EEF1G	Elongation factor 1-gamma	>sp|P26641|EF1G_HUMAN Elongation factor 1-gamma OS=Homo sapiens GN=EEF1G PE=1 SV=3;>tr|B4DTG2|B4DTG2_HUMAN Elongation factor 1-gamma OS=Homo sapiens GN=EEF1G PE=1 SV=1	ISO-MSMS	1	JACB153_1	MDA-MB-231 R10K8	789.35	3	786.347	2356.02	NaN	NaN	-0.47875	NaN	NaN	NaN	46.798	19.602	0.61912	46.798	46.497	47.116	0		0	0	0	2.4394e-10	1	15872	114.55	112.22	1	NaN	NaN	0
AAAPGVEDEPLLR	13	0	1	Unmodified	_AAAPGVEDEPLLR_			0	0	P31350-2;P31350;C9JXC1	P31350-2	P31350-2	RRM2	Ribonucleoside-diphosphate reductase subunit M2	>sp|P31350-2|RIR2_HUMAN Isoform 2 of Ribonucleoside-diphosphate reductase subunit M2 OS=Homo sapiens GN=RRM2;>sp|P31350|RIR2_HUMAN Ribonucleoside-diphosphate reductase subunit M2 OS=Homo sapiens GN=RRM2 PE=1 SV=1;>tr|C9JXC1|C9JXC1_HUMAN Ribonucleoside-diph	ISO-MSMS	1	JACB153_1	MDA-MB-231 R10K8	674.36	2	669.357	1336.7	NaN	NaN	1.3589	NaN	NaN	NaN	39.728	17.245	0.27867	39.728	39.574	39.853	0		0	0	0	0.0030306	1	13146	62.891	62.891	1	NaN	NaN	0
AAAQLLQSQAQQSGAQQTK	19	1	0	Unmodified	_AAAQLLQSQAQQSGAQQTK_			0	0	Q9NVA2-2;D6RER5;Q9NVA2;D6RGI3;H0Y961;H0Y9G8	Q9NVA2-2	Q9NVA2-2	2011-09-01	Septin-11	>sp|Q9NVA2-2|SEP11_HUMAN Isoform 2 of Septin-11 OS=Homo sapiens GN=SEPT11;>tr|D6RER5|D6RER5_HUMAN Septin-11 OS=Homo sapiens GN=SEPT11 PE=1 SV=1;>sp|Q9NVA2|SEP11_HUMAN Septin-11 OS=Homo sapiens GN=SEPT11 PE=1 SV=3;>tr|D6RGI3|D6RGI3_HUMAN Septin 11, isoform	ISO-MSMS	1	JACB153_1	MDA-MB-231 R10K8	655.68	3	653.008	1956	NaN	NaN	0.40269	NaN	NaN	NaN	26.413	12.808	0.33463	26.413	26.247	26.582	-1.9073e-06		0	0	0	3.307e-14	1	7784	142.35	127.39	1	NaN	NaN	0
AAATGAVAASAASGQAEGK	19	1	0	Acetyl (Protein N-term)	_(ac)AAATGAVAASAASGQAEGK_			1	0	Q9NWH9;H7BXE3;H0YL55;H0YLE6;H0YMR6;H0YNF3;H0YMW8;H0YLW7	Q9NWH9	Q9NWH9	SLTM	SAFB-like transcription modulator	>sp|Q9NWH9|SLTM_HUMAN SAFB-like transcription modulator OS=Homo sapiens GN=SLTM PE=1 SV=2;>tr|H7BXE3|H7BXE3_HUMAN SAFB-like transcription modulator (Fragment) OS=Homo sapiens GN=SLTM PE=1 SV=1;>tr|H0YL55|H0YL55_HUMAN SAFB-like transcription modulator (Frag	ISO-MSMS	1	JACB153_1	MDA-MB-231 R10K8	819.91	2	815.905	1629.8	NaN	NaN	2.5825	NaN	NaN	NaN	37.442	16.478	0.87316	37.442	36.997	37.87	0		0	0	0	1.8466e-14	1	12233	150.45	126.17	1	NaN	NaN	0
AAATGPSFWLGNETLK	16	1	0	Acetyl (Protein N-term)	_(ac)AAATGPSFWLGNETLK_			1	0	P12955;P12955-2;P12955-3	P12955	P12955	PEPD	Xaa-Pro dipeptidase	>sp|P12955|PEPD_HUMAN Xaa-Pro dipeptidase OS=Homo sapiens GN=PEPD PE=1 SV=3;>sp|P12955-2|PEPD_HUMAN Isoform 2 of Xaa-Pro dipeptidase OS=Homo sapiens GN=PEPD;>sp|P12955-3|PEPD_HUMAN Isoform 3 of Xaa-Pro dipeptidase OS=Homo sapiens GN=PEPD	ISO-MSMS	1	JACB153_1	MDA-MB-231 R10K8	857.44	2	852.933	1703.85	NaN	NaN	-0.29648	NaN	NaN	NaN	75.368	29.124	0.42498	75.368	75.152	75.577	0		0	0	0	0.00025567	1	26280	85.619	77.054	1	NaN	NaN	0
AAATPESQEPQAK	13	1	0	Unmodified	_AAATPESQEPQAK_			0	0	P49006	P49006	P49006	MARCKSL1	MARCKS-related protein	>sp|P49006|MRP_HUMAN MARCKS-related protein OS=Homo sapiens GN=MARCKSL1 PE=1 SV=2	ISO-MSMS	1	JACB153_1	MDA-MB-231 R10K8	668.33	2	664.328	1326.64	NaN	NaN	0.28254	NaN	NaN	NaN	14.94	8.98	0.086725	14.94	14.892	14.979	0		0	0	0	0.00052968	1	3421	74.537	74.537	1	NaN	NaN	0
AAAVLPVLDLAQR	13	0	1	Unmodified	_AAAVLPVLDLAQR_			0	0	E7EPT4;P19404	E7EPT4	E7EPT4	NDUFV2	NADH dehydrogenase [ubiquinone] flavoprotein 2, mitochondrial	>tr|E7EPT4|E7EPT4_HUMAN NADH dehydrogenase [ubiquinone] flavoprotein 2, mitochondrial OS=Homo sapiens GN=NDUFV2 PE=1 SV=1;>sp|P19404|NDUV2_HUMAN NADH dehydrogenase [ubiquinone] flavoprotein 2, mitochondrial OS=Homo sapiens GN=NDUFV2 PE=1 SV=2	ISO-MSMS	1	JACB153_1	MDA-MB-231 R10K8	673.9	2	668.901	1335.79	NaN	NaN	-0.21893	NaN	NaN	NaN	60.774	24.259	0.36872	60.774	60.572	60.94	0		0	0	0	0.0045234	1	21087	58.487	48.953	1	NaN	NaN	0
AACLCFR	7	0	1	Unmodified	_AACLCFR_			0	0	Q9NZJ9;Q9NZJ9-2;O95989;Q8NFP7;Q96G61	Q9NZJ9	Q9NZJ9	NUDT4;NUDT3;NUDT10;NUDT11	Diphosphoinositol polyphosphate phosphohydrolase 2;Diphosphoinositol polyphosphate phosphohydrolase 1;Diphosphoinositol polyphosphate phosphohydrolase 3-alpha;Diphosphoinositol polyphosphate phosphohydrolase 3-beta	>sp|Q9NZJ9|NUDT4_HUMAN Diphosphoinositol polyphosphate phosphohydrolase 2 OS=Homo sapiens GN=NUDT4 PE=1 SV=2;>sp|Q9NZJ9-2|NUDT4_HUMAN Isoform 2 of Diphosphoinositol polyphosphate phosphohydrolase 2 OS=Homo sapiens GN=NUDT4;>sp|O95989|NUDT3_HUMAN Diphosphoi	ISO-MSMS	1	JACB153_1	MDA-MB-231 R10K8	454.21	2	449.207	896.4	NaN	NaN	-1.0076	NaN	NaN	NaN	28.43	13.475	0.29666	28.43	28.258	28.554	0		0	0	0	0.026358	1	8624	62.714	20.116	1	NaN	NaN	0
AACLLDGVPVALK	13	1	0	Unmodified	_AACLLDGVPVALK_			0	0	Q8TDX7;Q8TDX7-2;F8WAG2	Q8TDX7	Q8TDX7	NEK7	Serine/threonine-protein kinase Nek7	>sp|Q8TDX7|NEK7_HUMAN Serine/threonine-protein kinase Nek7 OS=Homo sapiens GN=NEK7 PE=1 SV=1;>sp|Q8TDX7-2|NEK7_HUMAN Isoform 2 of Serine/threonine-protein kinase Nek7 OS=Homo sapiens GN=NEK7;>tr|F8WAG2|F8WAG2_HUMAN Serine/threonine-protein kinase Nek7 (Fra	ISO-MSMS	1	JACB153_1	MDA-MB-231 R10K8	667.88	2	663.876	1325.74	NaN	NaN	0.34115	NaN	NaN	NaN	55.552	22.518	0.22446	55.552	55.433	55.657	0		0	0	0	0.0050438	1	19200	56.951	48.541	1	NaN	NaN	0
AADEEAFEDNSEEYIR	16	0	1	Unmodified	_AADEEAFEDNSEEYIR_			0	0	P55060;P55060-3;P55060-4;B4DUC5	P55060	P55060	CSE1L	Exportin-2	>sp|P55060|XPO2_HUMAN Exportin-2 OS=Homo sapiens GN=CSE1L PE=1 SV=3;>sp|P55060-3|XPO2_HUMAN Isoform 3 of Exportin-2 OS=Homo sapiens GN=CSE1L;>sp|P55060-4|XPO2_HUMAN Isoform 4 of Exportin-2 OS=Homo sapiens GN=CSE1L;>tr|B4DUC5|B4DUC5_HUMAN Uncharacterized pr	ISO-MSMS	1	JACB153_1	MDA-MB-231 R10K8	949.4	2	944.398	1886.78	NaN	NaN	-0.15662	NaN	NaN	NaN	42.291	18.097	0.367	42.291	42.083	42.45	0		0	0	0	1.6421e-22	1	14133	183.6	173.75	1	NaN	NaN	0
AADHLEALAAIEDFFLEHEALGISMAK	27	1	0	Unmodified	_AADHLEALAAIEDFFLEHEALGISMAK_			0	0	Q13144;E9PC74	Q13144	Q13144	EIF2B5	Translation initiation factor eIF-2B subunit epsilon	>sp|Q13144|EI2BE_HUMAN Translation initiation factor eIF-2B subunit epsilon OS=Homo sapiens GN=EIF2B5 PE=1 SV=3;>tr|E9PC74|E9PC74_HUMAN Translation initiation factor eIF-2B subunit epsilon OS=Homo sapiens GN=EIF2B5 PE=1 SV=1	ISO-MSMS	1	JACB153_1	MDA-MB-231 R10K8	731.37	4	728.868	2911.44	NaN	NaN	-0.034909	NaN	NaN	NaN	86.449	32.817	0.54369	86.449	86.198	86.742	-7.6294e-06		0	0	0	0.0047596	1	30164	41.423	38.381	1	NaN	NaN	0
AAEAAAAPAESAAPAAGEEPSKEEGEPK	28	2	0	Unmodified	_AAEAAAAPAESAAPAAGEEPSKEEGEPK_			0	0	P80723	P80723	P80723	BASP1	Brain acid soluble protein 1	>sp|P80723|BASP1_HUMAN Brain acid soluble protein 1 OS=Homo sapiens GN=BASP1 PE=1 SV=2	ISO-MSMS	1	JACB153_1	MDA-MB-231 R10K8	885.09	3	879.416	2635.22	NaN	NaN	0.12158	NaN	NaN	NaN	23.096	11.698	0.48739	23.096	22.9	23.388	-1.9073e-06		0	0	0	0.00035032	1	6431	59.691	56.229	1	NaN	NaN	0
AAEAGGAEEQYGFLTTPTK	19	1	0	Unmodified	_AAEAGGAEEQYGFLTTPTK_			0	0	P46821	P46821	P46821	MAP1B	Microtubule-associated protein 1B;MAP1 light chain LC1	>sp|P46821|MAP1B_HUMAN Microtubule-associated protein 1B OS=Homo sapiens GN=MAP1B PE=1 SV=2	ISO-MSMS	1	JACB153_1	MDA-MB-231 R10K8	974.97	2	970.965	1939.92	NaN	NaN	0.39776	NaN	NaN	NaN	44.534	18.84	0.27926	44.534	44.397	44.676	-3.8147e-06		0	0	0	1.6753e-14	1	15030	149.34	140.51	1	NaN	NaN	0
AAEAVAAAVGTGATTAAVMAAAGIAAIGPAK	31	1	0	Unmodified	_AAEAVAAAVGTGATTAAVMAAAGIAAIGPAK_			0	0	P46821	P46821	P46821	MAP1B	Microtubule-associated protein 1B;MAP1 light chain LC1	>sp|P46821|MAP1B_HUMAN Microtubule-associated protein 1B OS=Homo sapiens GN=MAP1B PE=1 SV=2	ISO-MSMS	1	JACB153_1	MDA-MB-231 R10K8	878.48	3	875.474	2623.4	NaN	NaN	0.11439	NaN	NaN	NaN	83.556	31.848	0.47108	83.556	83.29	83.761	0		0	0	0	3.6988e-08	1	29161	84.365	77.595	1	NaN	NaN	0
AAEAVAAAVGTGATTAAVMAAAGIAAIGPAK	31	1	0	Unmodified	_AAEAVAAAVGTGATTAAVMAAAGIAAIGPAK_			0	0	P46821	P46821	P46821	MAP1B	Microtubule-associated protein 1B;MAP1 light chain LC1	>sp|P46821|MAP1B_HUMAN Microtubule-associated protein 1B OS=Homo sapiens GN=MAP1B PE=1 SV=2	ISO-MSMS	1	JACB153_1	MDA-MB-231 R10K8	659.11	4	656.857	2623.4	NaN	NaN	0.25505	NaN	NaN	NaN	83.537	31.848	0.4703	83.537	83.255	83.726	0		0	0	0	6.2006e-12	1	29165	90.097	86.941	1	NaN	NaN	0
AAEDDEDDDVDTK	13	1	0	Unmodified	_AAEDDEDDDVDTK_			0	0	P06454;P06454-2;B8ZZQ6;H7C2N1;B8ZZW7;B8ZZA1	P06454	P06454	PTMA	Prothymosin alpha;Thymosin alpha-1	>sp|P06454|PTMA_HUMAN Prothymosin alpha OS=Homo sapiens GN=PTMA PE=1 SV=2;>sp|P06454-2|PTMA_HUMAN Isoform 2 of Prothymosin alpha OS=Homo sapiens GN=PTMA;>tr|B8ZZQ6|B8ZZQ6_HUMAN Uncharacterized protein OS=Homo sapiens GN=PTMA PE=1 SV=1;>tr|H7C2N1|H7C2N1_HUM	ISO-MSMS	1	JACB153_1	MDA-MB-231 R10K8	723.29	2	719.279	1436.54	NaN	NaN	-0.0935	NaN	NaN	NaN	15.348	9.1122	0.20463	15.348	15.241	15.446	-9.5367e-07		0	0	0	0.00049837	1	3581	75.462	74.023	1	NaN	NaN	0
AAEEAFVNDIDESSPGTEWER	21	0	1	Unmodified	_AAEEAFVNDIDESSPGTEWER_			0	0	P09496;P09496-3;P09496-4;P09496-2;C9J8P9;P09496-5	P09496	P09496	CLTA	Clathrin light chain A	>sp|P09496|CLCA_HUMAN Clathrin light chain A OS=Homo sapiens GN=CLTA PE=1 SV=1;>sp|P09496-3|CLCA_HUMAN Isoform 3 of Clathrin light chain A OS=Homo sapiens GN=CLTA;>sp|P09496-4|CLCA_HUMAN Isoform 4 of Clathrin light chain A OS=Homo sapiens GN=CLTA;>sp|P0949	ISO-MSMS	1	JACB153_1	MDA-MB-231 R10K8	1182.02	2	1176.52	2351.02	NaN	NaN	-0.35141	NaN	NaN	NaN	54.767	22.256	0.53749	54.767	54.511	55.048	0		0	0	0	3.3987e-30	1	18888	176.73	170.27	1	NaN	NaN	0
AAELEMELNEHSLVIDTLK	19	1	0	Unmodified	_AAELEMELNEHSLVIDTLK_			0	0	Q9UHV9	Q9UHV9	Q9UHV9	PFDN2	Prefoldin subunit 2	>sp|Q9UHV9|PFD2_HUMAN Prefoldin subunit 2 OS=Homo sapiens GN=PFDN2 PE=1 SV=1	ISO-MSMS	1	JACB153_1	MDA-MB-231 R10K8	722.04	3	719.037	2154.09	NaN	NaN	1.105	NaN	NaN	NaN	57.802	23.266	0.40453	57.802	57.617	58.022	3.8147e-06		0	0	0	1.0543e-05	1	20014	85.808	85.808	1	NaN	NaN	0
AAELIANSLATAGDGLIELR	20	0	1	Unmodified	_AAELIANSLATAGDGLIELR_			0	0	P35232;C9JW96	P35232	P35232	PHB	Prohibitin	>sp|P35232|PHB_HUMAN Prohibitin OS=Homo sapiens GN=PHB PE=1 SV=1;>tr|C9JW96|C9JW96_HUMAN Prohibitin (Fragment) OS=Homo sapiens GN=PHB PE=1 SV=2	ISO-MSMS	1	JACB153_1	MDA-MB-231 R10K8	670.37	3	666.7	1997.08	NaN	NaN	1.1268	NaN	NaN	NaN	70.763	27.584	0.57926	70.763	70.5	71.079	0		0	0	0	1.0933e-15	1	24629	142.3	127.61	1	NaN	NaN	0
AAELIANSLATAGDGLIELR	20	0	1	Unmodified	_AAELIANSLATAGDGLIELR_			0	0	P35232;C9JW96	P35232	P35232	PHB	Prohibitin	>sp|P35232|PHB_HUMAN Prohibitin OS=Homo sapiens GN=PHB PE=1 SV=1;>tr|C9JW96|C9JW96_HUMAN Prohibitin (Fragment) OS=Homo sapiens GN=PHB PE=1 SV=2	ISO-MSMS	1	JACB153_1	MDA-MB-231 R10K8	1005.05	2	999.547	1997.08	NaN	NaN	0.7548	NaN	NaN	NaN	70.719	27.577	0.43958	70.719	70.538	70.978	0		0	0	0	2.3882e-23	1	24630	173.27	160.23	1	NaN	NaN	0
AAEMLSQLDLFSR	13	0	1	Unmodified	_AAEMLSQLDLFSR_			0	0	P78318	P78318	P78318	IGBP1	Immunoglobulin-binding protein 1	>sp|P78318|IGBP1_HUMAN Immunoglobulin-binding protein 1 OS=Homo sapiens GN=IGBP1 PE=1 SV=1	ISO-MSMS	1	JACB153_1	MDA-MB-231 R10K8	745.88	2	740.877	1479.74	NaN	NaN	-0.2822	NaN	NaN	NaN	64.818	25.607	0.33722	64.818	64.631	64.968	0		0	0	0	0.00049137	1	22572	75.669	53.091	1	NaN	NaN	0
AAEMMASLLK	10	1	0	Unmodified	_AAEMMASLLK_			0	0	P33176	P33176	P33176	KIF5B	Kinesin-1 heavy chain	>sp|P33176|KINH_HUMAN Kinesin-1 heavy chain OS=Homo sapiens GN=KIF5B PE=1 SV=1	ISO-MSMS	1	JACB153_1	MDA-MB-231 R10K8	536.79	2	532.778	1063.54	NaN	NaN	-2.1611	NaN	NaN	NaN	46.45	19.486	0.49481	46.45	46.209	46.704	0		0	0	0	0.0012798	1	15754	80.763	68.147	1	NaN	NaN	0
AAETQTLNFGPEWLR	15	0	1	Acetyl (Protein N-term)	_(ac)AAETQTLNFGPEWLR_			1	0	I1E4Y6;Q6Y7W6-3;Q6Y7W6;Q6Y7W6-5;Q6Y7W6-4;E7ESB6;C9JHW1;C9JRZ2;C9JHT0;C9J0V6;C9JXQ0;C9JPV7;F8WCD5;C9JW88	I1E4Y6	I1E4Y6	GIGYF2	PERQ amino acid-rich with GYF domain-containing protein 2	>tr|I1E4Y6|I1E4Y6_HUMAN PERQ amino acid-rich with GYF domain-containing protein 2 OS=Homo sapiens GN=GIGYF2 PE=1 SV=1;>sp|Q6Y7W6-3|PERQ2_HUMAN Isoform 2 of PERQ amino acid-rich with GYF domain-containing protein 2 OS=Homo sapiens GN=GIGYF2;>sp|Q6Y7W6|PERQ2	ISO-MSMS	1	JACB153_1	MDA-MB-231 R10K8	893.45	2	887.942	1773.87	NaN	NaN	0.43555	NaN	NaN	NaN	78.876	30.291	0.32014	78.876	78.687	79.007	0		0	0	0	0.00032584	1	27557	91.441	83.264	1	NaN	NaN	0
AAFDDAIAELDTLSEESYK	19	1	0	Unmodified	_AAFDDAIAELDTLSEESYK_			0	0	P62258;P62258-2;K7EM20	P62258	P62258	YWHAE	14-3-3 protein epsilon	>sp|P62258|1433E_HUMAN 14-3-3 protein epsilon OS=Homo sapiens GN=YWHAE PE=1 SV=1;>sp|P62258-2|1433E_HUMAN Isoform SV of 14-3-3 protein epsilon OS=Homo sapiens GN=YWHAE;>tr|K7EM20|K7EM20_HUMAN 14-3-3 protein epsilon (Fragment) OS=Homo sapiens GN=YWHAE PE=1	ISO-MSMS	1	JACB153_1	MDA-MB-231 R10K8	699.33	3	696.66	2086.96	NaN	NaN	-0.17638	NaN	NaN	NaN	78.04	30.014	0.83951	78.04	77.63	78.469	0		0	0	0	7.5117e-29	2	27286	188.27	179.77	1	NaN	NaN	0
AAFECMYTLLDSCLDR	16	0	1	Unmodified	_AAFECMYTLLDSCLDR_			0	0	Q86VP6;Q86VP6-2	Q86VP6	Q86VP6	CAND1	Cullin-associated NEDD8-dissociated protein 1	>sp|Q86VP6|CAND1_HUMAN Cullin-associated NEDD8-dissociated protein 1 OS=Homo sapiens GN=CAND1 PE=1 SV=2;>sp|Q86VP6-2|CAND1_HUMAN Isoform 2 of Cullin-associated NEDD8-dissociated protein 1 OS=Homo sapiens GN=CAND1	ISO-MSMS	1	JACB153_1	MDA-MB-231 R10K8	988.44	2	982.931	1963.85	NaN	NaN	0.056859	NaN	NaN	NaN	73.122	28.373	0.29033	73.122	73.001	73.291	0		0	0	0	0.00074057	1	25507	66.965	57.55	1	NaN	NaN	0
AAFTAFEEAQLPR	13	0	1	Unmodified	_AAFTAFEEAQLPR_			0	0	Q96CT7	Q96CT7	Q96CT7	CCDC124	Coiled-coil domain-containing protein 124	>sp|Q96CT7|CC124_HUMAN Coiled-coil domain-containing protein 124 OS=Homo sapiens GN=CCDC124 PE=1 SV=1	ISO-MSMS	1	JACB153_1	MDA-MB-231 R10K8	730.87	2	725.87	1449.73	NaN	NaN	0.54048	NaN	NaN	NaN	51.731	21.245	0.45269	51.731	51.495	51.948	0		0	0	0	4.5906e-10	1	17749	155.02	146.5	1	NaN	NaN	0
AAFVSEQQQK	10	1	0	Unmodified	_AAFVSEQQQK_			0	0	P26006-1;P26006;H0YA49	P26006-1	P26006-1	ITGA3	Integrin alpha-3;Integrin alpha-3 heavy chain;Integrin alpha-3 light chain	>sp|P26006-1|ITA3_HUMAN Isoform 2 of Integrin alpha-3 OS=Homo sapiens GN=ITGA3;>sp|P26006|ITA3_HUMAN Integrin alpha-3 OS=Homo sapiens GN=ITGA3 PE=1 SV=5;>tr|H0YA49|H0YA49_HUMAN Integrin alpha-3 (Fragment) OS=Homo sapiens GN=ITGA3 PE=1 SV=1	ISO-MSMS	1	JACB153_1	MDA-MB-231 R10K8	572.3	2	568.291	1134.57	NaN	NaN	1.3606	NaN	NaN	NaN	17.744	9.9157	0.25531	17.744	17.622	17.877	0		0	0	0	3.3968e-05	1	4435	138.08	134.32	1	NaN	NaN	0
AAGGDHGSPDSYR	13	0	1	Acetyl (Protein N-term)	_(ac)AAGGDHGSPDSYR_			1	0	P30566;E7ERF4;P30566-2	P30566	P30566	ADSL	Adenylosuccinate lyase	>sp|P30566|PUR8_HUMAN Adenylosuccinate lyase OS=Homo sapiens GN=ADSL PE=1 SV=2;>tr|E7ERF4|E7ERF4_HUMAN Adenylosuccinate lyase OS=Homo sapiens GN=ADSL PE=1 SV=1;>sp|P30566-2|PUR8_HUMAN Isoform 2 of Adenylosuccinate lyase OS=Homo sapiens GN=ADSL	ISO-MSMS	1	JACB153_1	MDA-MB-231 R10K8	671.29	2	666.284	1330.55	NaN	NaN	-1.6561	NaN	NaN	NaN	18.585	10.193	0.38896	18.585	18.403	18.792	1.9073e-06		0	0	0	0.00010138	1	4749	91.62	91.62	1	NaN	NaN	0
AAGGIELFVGGIGPDGHIAFNEPGSSLVSR	30	0	1	Unmodified	_AAGGIELFVGGIGPDGHIAFNEPGSSLVSR_			0	0	P46926;D6R9P4;E7EVU7;D6RAY7;D6RB13;D6RFF8	P46926	P46926	GNPDA1	Glucosamine-6-phosphate isomerase 1	>sp|P46926|GNPI1_HUMAN Glucosamine-6-phosphate isomerase 1 OS=Homo sapiens GN=GNPDA1 PE=1 SV=1;>tr|D6R9P4|D6R9P4_HUMAN Glucosamine-6-phosphate isomerase 1 OS=Homo sapiens GN=GNPDA1 PE=1 SV=1;>tr|E7EVU7|E7EVU7_HUMAN Glucosamine-6-phosphate isomerase 1 OS=Ho	ISO-MSMS	1	JACB153_1	MDA-MB-231 R10K8	979.17	3	975.502	2923.48	NaN	NaN	2.1325	NaN	NaN	NaN	68.738	26.917	0.35513	68.738	68.562	68.917	-7.6294e-06		0	0	0	4.5622e-19	1	23940	120.6	112.42	1	NaN	NaN	0
AAGSGELGVTMK	12	1	0	Unmodified	_AAGSGELGVTMK_			0	0	O75369;O75369-9;O75369-2;O75369-3;O75369-6;O75369-7;E7EN95;O75369-4;O75369-5;O75369-8	O75369;O75369-8	O75369-8	FLNB	Filamin-B	>sp|O75369|FLNB_HUMAN Filamin-B OS=Homo sapiens GN=FLNB PE=1 SV=2;>sp|O75369-9|FLNB_HUMAN Isoform 9 of Filamin-B OS=Homo sapiens GN=FLNB;>sp|O75369-2|FLNB_HUMAN Isoform 2 of Filamin-B OS=Homo sapiens GN=FLNB;>sp|O75369-3|FLNB_HUMAN Isoform 3 of Filamin-B O	ISO-MSMS	1	JACB153_1	MDA-MB-231 R10K8	564.79	2	560.787	1119.56	NaN	NaN	0.54243	NaN	NaN	NaN	27.366	13.12	0.36532	27.366	27.207	27.573	0		0	0	0	0.00014228	1	8150	94.122	66.818	1	NaN	NaN	0
AAGTAAALAFLSQESR	16	0	1	Acetyl (Protein N-term)	_(ac)AAGTAAALAFLSQESR_			1	0	O75607	O75607	O75607	NPM3	Nucleoplasmin-3	>sp|O75607|NPM3_HUMAN Nucleoplasmin-3 OS=Homo sapiens GN=NPM3 PE=1 SV=3	ISO-MSMS	1	JACB153_1	MDA-MB-231 R10K8	808.42	2	803.415	1604.82	NaN	NaN	0.27693	NaN	NaN	NaN	81.793	31.263	0.4777	81.793	81.575	82.053	0		0	0	0	3.8513e-18	1	28565	172.91	151.85	1	NaN	NaN	0
AAGTLYTYPENWR	13	0	1	Acetyl (Protein N-term)	_(ac)AAGTLYTYPENWR_			1	0	P26641	P26641	P26641	EEF1G	Elongation factor 1-gamma	>sp|P26641|EF1G_HUMAN Elongation factor 1-gamma OS=Homo sapiens GN=EEF1G PE=1 SV=3	ISO-MSMS	1	JACB153_1	MDA-MB-231 R10K8	797.88	2	792.378	1582.74	NaN	NaN	-0.048812	NaN	NaN	NaN	64.676	25.56	0.57179	64.676	64.396	64.968	0		0	0	0	1.7083e-17	1	22454	178.1	176.08	1	NaN	NaN	0
AAGVAGWGVEAEEFEDAPDVEPLEPTLSNIIEQR	34	0	1	Acetyl (Protein N-term)	_(ac)AAGVAGWGVEAEEFEDAPDVEPLEPTLSNIIEQR_			1	0	O43681;K7ERW9	O43681	O43681	ASNA1	ATPase ASNA1	>sp|O43681|ASNA_HUMAN ATPase ASNA1 OS=Homo sapiens GN=ASNA1 PE=1 SV=2;>tr|K7ERW9|K7ERW9_HUMAN ATPase ASNA1 (Fragment) OS=Homo sapiens GN=ASNA1 PE=1 SV=1	ISO-MSMS	1	JACB153_1	MDA-MB-231 R10K8	923.95	4	920.946	3679.75	NaN	NaN	0.47755	NaN	NaN	NaN	101.13	87.045	0.39767	101.13	100.95	101.35	-7.6294e-06		0	0	0	0.0023826	1	34954	41.133	40.676	1	NaN	NaN	0
AAGVEAAAEVAATEIK	16	1	0	Acetyl (Protein N-term)	_(ac)AAGVEAAAEVAATEIK_			1	0	P52272;P52272-2;M0R019;M0R2T0;M0R0N3;M0QYQ7;M0R0Y6	P52272	P52272	HNRNPM	Heterogeneous nuclear ribonucleoprotein M	>sp|P52272|HNRPM_HUMAN Heterogeneous nuclear ribonucleoprotein M OS=Homo sapiens GN=HNRNPM PE=1 SV=3;>sp|P52272-2|HNRPM_HUMAN Isoform 2 of Heterogeneous nuclear ribonucleoprotein M OS=Homo sapiens GN=HNRNPM;>tr|M0R019|M0R019_HUMAN Heterogeneous nuclear rib	ISO-MSMS	1	JACB153_1	MDA-MB-231 R10K8	775.91	2	771.904	1541.79	NaN	NaN	-0.26146	NaN	NaN	NaN	74.802	28.934	1.5477	74.802	73.901	75.448	0		0	0	0	9.3106e-48	2	26086	226.24	202.82	1	NaN	NaN	0
AAGVNVEPFWPGLFAK	16	1	0	Unmodified	_AAGVNVEPFWPGLFAK_			0	0	P05386	P05386	P05386	RPLP1	60S acidic ribosomal protein P1	>sp|P05386|RLA1_HUMAN 60S acidic ribosomal protein P1 OS=Homo sapiens GN=RPLP1 PE=1 SV=1	ISO-MSMS	1	JACB153_1	MDA-MB-231 R10K8	855.96	2	851.951	1701.89	NaN	NaN	-0.41682	NaN	NaN	NaN	72.903	28.302	0.74251	72.903	72.609	73.351	0		0	0	0	5.6723e-05	2	25371	100.54	100.54	1	NaN	NaN	0
AAGVNVEPFWPGLFAK	16	1	0	Unmodified	_AAGVNVEPFWPGLFAK_			0	0	P05386	P05386	P05386	RPLP1	60S acidic ribosomal protein P1	>sp|P05386|RLA1_HUMAN 60S acidic ribosomal protein P1 OS=Homo sapiens GN=RPLP1 PE=1 SV=1	ISO-MSMS	1	JACB153_1	MDA-MB-231 R10K8	570.98	3	568.303	1701.89	NaN	NaN	0.31414	NaN	NaN	NaN	72.893	28.298	0.48111	72.893	72.609	73.09	0		0	0	0	0.0023906	1	25401	58.885	41.141	1	NaN	NaN	0
AAHLCAEAALR	11	0	1	Unmodified	_AAHLCAEAALR_			0	0	Q9UQ80;F8VR77;F8W0A3;H0YIN7	Q9UQ80	Q9UQ80	PA2G4	Proliferation-associated protein 2G4	>sp|Q9UQ80|PA2G4_HUMAN Proliferation-associated protein 2G4 OS=Homo sapiens GN=PA2G4 PE=1 SV=3;>tr|F8VR77|F8VR77_HUMAN Proliferation-associated protein 2G4 OS=Homo sapiens GN=PA2G4 PE=1 SV=1;>tr|F8W0A3|F8W0A3_HUMAN Proliferation-associated protein 2G4 (Fra	ISO-MSMS	1	JACB153_1	MDA-MB-231 R10K8	398.21	3	394.873	1181.6	NaN	NaN	4.9835	NaN	NaN	NaN	21.398	11.135	0.808	21.398	21.053	21.861	-1.9073e-06		0	0	0	0.00062634	1	5758	83	46.472	1	NaN	NaN	0
AAIDWFDGK	9	1	0	Unmodified	_AAIDWFDGK_			0	0	P35637;P35637-2;H3BPE7;Q92804;Q92804-2;K7EPT6	P35637;Q92804	P35637	FUS;TAF15	RNA-binding protein FUS;TATA-binding protein-associated factor 2N	>sp|P35637|FUS_HUMAN RNA-binding protein FUS OS=Homo sapiens GN=FUS PE=1 SV=1;>sp|P35637-2|FUS_HUMAN Isoform Short of RNA-binding protein FUS OS=Homo sapiens GN=FUS;>tr|H3BPE7|H3BPE7_HUMAN RNA-binding protein FUS OS=Homo sapiens GN=FUS PE=1 SV=1;>sp|Q92804	ISO-MSMS	1	JACB153_1	MDA-MB-231 R10K8	515.76	2	511.751	1021.49	NaN	NaN	0.18712	NaN	NaN	NaN	50.717	20.91	0.70402	50.717	50.363	51.067	0		0	0	0	0.00051497	2	17438	109.29	38.382	1	NaN	NaN	0
AAIGCGIVESILNWVK	16	1	0	Unmodified	_AAIGCGIVESILNWVK_			0	0	P11388-4;P11388-3;P11388-2;P11388	P11388-4	P11388-4	TOP2A	DNA topoisomerase 2-alpha	>sp|P11388-4|TOP2A_HUMAN Isoform 4 of DNA topoisomerase 2-alpha OS=Homo sapiens GN=TOP2A;>sp|P11388-3|TOP2A_HUMAN Isoform 3 of DNA topoisomerase 2-alpha OS=Homo sapiens GN=TOP2A;>sp|P11388-2|TOP2A_HUMAN Isoform 2 of DNA topoisomerase 2-alpha OS=Homo sapien	ISO-MSMS	1	JACB153_1	MDA-MB-231 R10K8	580.32	3	577.315	1728.92	NaN	NaN	-0.23618	NaN	NaN	NaN	90.088	34.027	0.43359	90.088	89.876	90.31	0		0	0	0	0.011411	1	31422	49.482	41.89	1	NaN	NaN	0
AAIGLLAR	8	0	1	Unmodified	_AAIGLLAR_			0	0	P07741;H3BQB1;H3BQF1;P07741-2;H3BQZ9;H3BSW3	P07741	P07741	APRT	Adenine phosphoribosyltransferase	>sp|P07741|APT_HUMAN Adenine phosphoribosyltransferase OS=Homo sapiens GN=APRT PE=1 SV=2;>tr|H3BQB1|H3BQB1_HUMAN Adenine phosphoribosyltransferase (Fragment) OS=Homo sapiens GN=APRT PE=1 SV=1;>tr|H3BQF1|H3BQF1_HUMAN Adenine phosphoribosyltransferase (Fragm	ISO-MSMS	1	JACB153_1	MDA-MB-231 R10K8	397.76	2	392.756	783.497	NaN	NaN	-0.68365	NaN	NaN	NaN	35.604	15.868	0.30161	35.604	35.434	35.736	0		0	0	0	0.0071605	1	11505	76.899	7.5546	1	NaN	NaN	0
AAILPTSIFLTNK	13	1	0	Unmodified	_AAILPTSIFLTNK_			0	0	O14744;O14744-2;O14744-5;O14744-3;B4DV00;H0YJX6	O14744	O14744	PRMT5	Protein arginine N-methyltransferase 5;Protein arginine N-methyltransferase 5, N-terminally processed	>sp|O14744|ANM5_HUMAN Protein arginine N-methyltransferase 5 OS=Homo sapiens GN=PRMT5 PE=1 SV=4;>sp|O14744-2|ANM5_HUMAN Isoform 2 of Protein arginine N-methyltransferase 5 OS=Homo sapiens GN=PRMT5;>sp|O14744-5|ANM5_HUMAN Isoform 5 of Protein arginine N-met	ISO-MSMS	1	JACB153_1	MDA-MB-231 R10K8	698.92	2	694.911	1387.81	NaN	NaN	-0.054719	NaN	NaN	NaN	62.727	24.911	0.34702	62.727	62.557	62.904	0		0	0	0	0.004045	1	21766	59.898	40.84	1	NaN	NaN	0
AALAGGTTMIIDHVVPEPGTSLLAAFDQWR	30	0	1	Unmodified	_AALAGGTTMIIDHVVPEPGTSLLAAFDQWR_			0	0	Q16555;Q16555-2	Q16555	Q16555	DPYSL2	Dihydropyrimidinase-related protein 2	>sp|Q16555|DPYL2_HUMAN Dihydropyrimidinase-related protein 2 OS=Homo sapiens GN=DPYSL2 PE=1 SV=1;>sp|Q16555-2|DPYL2_HUMAN Isoform 2 of Dihydropyrimidinase-related protein 2 OS=Homo sapiens GN=DPYSL2	ISO-MSMS	1	JACB153_1	MDA-MB-231 R10K8	1050.55	3	1046.54	3136.6	NaN	NaN	0.64682	NaN	NaN	NaN	83.094	31.697	0.77585	83.094	82.731	83.507	-7.6294e-06		0	0	0	1.3974e-07	1	29018	78.921	74.017	1	NaN	NaN	0
AALAHSEEVTASQVAATK	18	1	0	Unmodified	_AALAHSEEVTASQVAATK_			0	0	Q15149-4;Q15149;Q15149-2;Q15149-6;Q15149-5;Q15149-9;Q15149-8;Q15149-7;Q15149-3;H0YDN1	Q15149-4	Q15149-4	PLEC	Plectin	>sp|Q15149-4|PLEC_HUMAN Isoform 4 of Plectin OS=Homo sapiens GN=PLEC;>sp|Q15149|PLEC_HUMAN Plectin OS=Homo sapiens GN=PLEC PE=1 SV=3;>sp|Q15149-2|PLEC_HUMAN Isoform 2 of Plectin OS=Homo sapiens GN=PLEC;>sp|Q15149-6|PLEC_HUMAN Isoform 6 of Plectin OS=Homo s	ISO-MSMS	1	JACB153_1	MDA-MB-231 R10K8	597.98	3	595.311	1782.91	NaN	NaN	0.69448	NaN	NaN	NaN	24.553	12.181	0.36945	24.553	24.37	24.74	0		0	0	0	2.1889e-20	1	7029	170.78	154.64	1	NaN	NaN	0
AALANLCIGDVITAIDGENTSNMTHLEAQNR	31	0	1	Unmodified	_AALANLCIGDVITAIDGENTSNMTHLEAQNR_			0	0	O00151	O00151	O00151	PDLIM1	PDZ and LIM domain protein 1	>sp|O00151|PDLI1_HUMAN PDZ and LIM domain protein 1 OS=Homo sapiens GN=PDLIM1 PE=1 SV=4	ISO-MSMS	1	JACB153_1	MDA-MB-231 R10K8	1108.87	3	1104.87	3311.59	NaN	NaN	-0.28357	NaN	NaN	NaN	71.408	27.801	0.50741	71.408	71.152	71.66	0		0	0	0	7.0667e-08	1	24858	81.839	73.219	1	NaN	NaN	0
AALAPLPPLPAQFK	14	1	0	Acetyl (Protein N-term)	_(ac)AALAPLPPLPAQFK_			1	0	Q9NP79	Q9NP79	Q9NP79	VTA1	Vacuolar protein sorting-associated protein VTA1 homolog	>sp|Q9NP79|VTA1_HUMAN Vacuolar protein sorting-associated protein VTA1 homolog OS=Homo sapiens GN=VTA1 PE=1 SV=1	ISO-MSMS	1	JACB153_1	MDA-MB-231 R10K8	742.44	2	738.435	1474.85	NaN	NaN	0.36468	NaN	NaN	NaN	80.982	30.995	0.61615	80.982	80.624	81.24	0		0	0	0	0.00055031	1	28264	73.848	66.123	1	NaN	NaN	0
AALDSLSLFTSLGLSEQK	18	1	0	Acetyl (Protein N-term)	_(ac)AALDSLSLFTSLGLSEQK_			1	0	P47897;B4DWJ2;B7Z840;C9J165;C9JSG9;F2Z2V6	P47897	P47897	QARS	Glutamine--tRNA ligase	>sp|P47897|SYQ_HUMAN Glutamine--tRNA ligase OS=Homo sapiens GN=QARS PE=1 SV=1;>tr|B4DWJ2|B4DWJ2_HUMAN Uncharacterized protein OS=Homo sapiens GN=QARS PE=1 SV=1;>tr|B7Z840|B7Z840_HUMAN Glutamine--tRNA ligase OS=Homo sapiens GN=QARS PE=1 SV=1;>tr|C9J165|C9J1	ISO-MSMS	1	JACB153_1	MDA-MB-231 R10K8	965.52	2	961.509	1921	NaN	NaN	0.59589	NaN	NaN	NaN	102.06	93.016	0.3324	102.06	101.93	102.26	7.6294e-06		0	0	0	4.8986e-80	1	35218	270.84	242.26	1	NaN	NaN	0
AALEALGSCLNNK	13	1	0	Unmodified	_AALEALGSCLNNK_			0	0	P34897;P34897-3;P34897-2;G3V5L0;G3V4W5;G3V540;G3V2W0;G3V2E4;G3V4X0;G3V4T0;G3V3Y8;G3V241	P34897	P34897	SHMT2	Serine hydroxymethyltransferase, mitochondrial	>sp|P34897|GLYM_HUMAN Serine hydroxymethyltransferase, mitochondrial OS=Homo sapiens GN=SHMT2 PE=1 SV=3;>sp|P34897-3|GLYM_HUMAN Isoform 3 of Serine hydroxymethyltransferase, mitochondrial OS=Homo sapiens GN=SHMT2;>sp|P34897-2|GLYM_HUMAN Isoform 2 of Serine	ISO-MSMS	1	JACB153_1	MDA-MB-231 R10K8	684.86	2	680.848	1359.68	NaN	NaN	-0.051062	NaN	NaN	NaN	38.828	16.943	0.55677	38.828	38.49	39.047	0		0	0	0	2.3497e-06	1	12763	114.24	68.586	1	NaN	NaN	0
AALEALGSCLNNK	13	1	0	Unmodified	_AALEALGSCLNNK_			0	0	P34897;P34897-3;P34897-2;G3V5L0;G3V4W5;G3V540;G3V2W0;G3V2E4;G3V4X0;G3V4T0;G3V3Y8;G3V241	P34897	P34897	SHMT2	Serine hydroxymethyltransferase, mitochondrial	>sp|P34897|GLYM_HUMAN Serine hydroxymethyltransferase, mitochondrial OS=Homo sapiens GN=SHMT2 PE=1 SV=3;>sp|P34897-3|GLYM_HUMAN Isoform 3 of Serine hydroxymethyltransferase, mitochondrial OS=Homo sapiens GN=SHMT2;>sp|P34897-2|GLYM_HUMAN Isoform 2 of Serine	ISO-MSMS	1	JACB153_1	MDA-MB-231 R10K8	456.91	3	454.234	1359.68	NaN	NaN	1.0814	NaN	NaN	NaN	38.836	16.943	0.30262	38.836	38.655	38.957	0		0	0	0	0.021991	1	12791	48.659	29.528	1	NaN	NaN	0
AALEDTLAETEAR	13	0	1	Unmodified	_AALEDTLAETEAR_			0	0	CON__P08727;P08727;K7EMS3	CON__P08727	CON__P08727	KRT19	Keratin, type I cytoskeletal 19	>P08727 SWISS-PROT:P08727 Tax_Id=9606 Gene_Symbol=KRT19 Keratin, type I cytoskeletal 19;>sp|P08727|K1C19_HUMAN Keratin, type I cytoskeletal 19 OS=Homo sapiens GN=KRT19 PE=1 SV=4;>tr|K7EMS3|K7EMS3_HUMAN Keratin, type I cytoskeletal 19 (Fragment) OS=Homo sap	ISO-MSMS	1	JACB153_1	MDA-MB-231 R10K8	700.35	2	695.346	1388.68	NaN	NaN	-0.21635	NaN	NaN	NaN	38.231	16.74	0.48806	38.231	37.983	38.471	0		0	0	0	7.0061e-08	1	12494	134.68	110.94	1	NaN	NaN	0
AALGPLVTGLYDVQAFK	17	1	0	Unmodified	_AALGPLVTGLYDVQAFK_			0	0	P11172;E9PFD2;F8WDG4;F2Z303;F2Z3P2	P11172	P11172	UMPS	Uridine 5-monophosphate synthase;Orotate phosphoribosyltransferase;Orotidine 5-phosphate decarboxylase	>sp|P11172|UMPS_HUMAN Uridine 5-monophosphate synthase OS=Homo sapiens GN=UMPS PE=1 SV=1;>tr|E9PFD2|E9PFD2_HUMAN Orotate phosphoribosyltransferase OS=Homo sapiens GN=UMPS PE=1 SV=1;>tr|F8WDG4|F8WDG4_HUMAN Orotate phosphoribosyltransferase OS=Homo sapiens	ISO-MSMS	1	JACB153_1	MDA-MB-231 R10K8	591.34	3	588.329	1761.97	NaN	NaN	0.65811	NaN	NaN	NaN	71.094	27.697	0.44931	71.094	70.858	71.307	0		0	0	0	0.010286	1	24783	47.548	36.286	1	NaN	NaN	0
AALGPSSQNVTEYVVR	16	0	1	Acetyl (Protein N-term)	_(ac)AALGPSSQNVTEYVVR_			1	0	P35269;M0R0Z3	P35269	P35269	GTF2F1	General transcription factor IIF subunit 1	>sp|P35269|T2FA_HUMAN General transcription factor IIF subunit 1 OS=Homo sapiens GN=GTF2F1 PE=1 SV=2;>tr|M0R0Z3|M0R0Z3_HUMAN General transcription factor IIF subunit 1 (Fragment) OS=Homo sapiens GN=GTF2F1 PE=1 SV=1	ISO-MSMS	1	JACB153_1	MDA-MB-231 R10K8	872.45	2	866.947	1731.88	NaN	NaN	-1.8739	NaN	NaN	NaN	60.016	24.008	0.37944	60.016	59.827	60.207	3.8147e-06		0	0	0	2.5023e-08	1	20791	125.28	108.54	1	NaN	NaN	0
AALGPSSQNVTEYVVR	16	0	1	Acetyl (Protein N-term)	_(ac)AALGPSSQNVTEYVVR_			1	0	P35269;M0R0Z3	P35269	P35269	GTF2F1	General transcription factor IIF subunit 1	>sp|P35269|T2FA_HUMAN General transcription factor IIF subunit 1 OS=Homo sapiens GN=GTF2F1 PE=1 SV=2;>tr|M0R0Z3|M0R0Z3_HUMAN General transcription factor IIF subunit 1 (Fragment) OS=Homo sapiens GN=GTF2F1 PE=1 SV=1	ISO-MSMS	1	JACB153_1	MDA-MB-231 R10K8	581.97	3	578.3	1731.88	NaN	NaN	-0.54378	NaN	NaN	NaN	60.015	24.008	0.33196	60.015	59.845	60.177	3.8147e-06		0	0	0	8.7479e-05	1	20813	99.566	86.429	1	NaN	NaN	0
AALGVLESDLPSAVTLLK	18	1	0	Acetyl (Protein N-term)	_(ac)AALGVLESDLPSAVTLLK_			1	0	Q8NEJ9;Q8NEJ9-2	Q8NEJ9	Q8NEJ9	NGDN	Neuroguidin	>sp|Q8NEJ9|NGDN_HUMAN Neuroguidin OS=Homo sapiens GN=NGDN PE=1 SV=1;>sp|Q8NEJ9-2|NGDN_HUMAN Isoform 2 of Neuroguidin OS=Homo sapiens GN=NGDN	ISO-MSMS	1	JACB153_1	MDA-MB-231 R10K8	924.53	2	920.027	1838.04	NaN	NaN	0.2754	NaN	NaN	NaN	101.51	89.446	0.3595	101.51	101.32	101.68	0		0	0	0	0.031303	1	35014	35.329	33.551	1	NaN	NaN	0
AALIMQVLQLTADQIAMLPPEQR	23	0	1	Unmodified	_AALIMQVLQLTADQIAMLPPEQR_			0	0	E7EWR4;P33240;P33240-2;Q9H0L4	E7EWR4	E7EWR4	CSTF2;CSTF2T	Cleavage stimulation factor subunit 2;Cleavage stimulation factor subunit 2 tau variant	>tr|E7EWR4|E7EWR4_HUMAN Cleavage stimulation factor subunit 2 OS=Homo sapiens GN=CSTF2 PE=1 SV=1;>sp|P33240|CSTF2_HUMAN Cleavage stimulation factor subunit 2 OS=Homo sapiens GN=CSTF2 PE=1 SV=1;>sp|P33240-2|CSTF2_HUMAN Isoform 2 of Cleavage stimulation fact	ISO-MSMS	1	JACB153_1	MDA-MB-231 R10K8	854.47	3	850.798	2549.37	NaN	NaN	0.39803	NaN	NaN	NaN	99.46	76.32	0.63415	99.46	99.197	99.831	-7.6294e-06		0	0	0	0.15393	1	34415	20.891	19.562	1	NaN	NaN	0
AALLAELALLEPEALR	16	0	1	Unmodified	_AALLAELALLEPEALR_			0	0	Q3KQV9	Q3KQV9	Q3KQV9	UAP1L1	UDP-N-acetylhexosamine pyrophosphorylase-like protein 1	>sp|Q3KQV9|UAP1L_HUMAN UDP-N-acetylhexosamine pyrophosphorylase-like protein 1 OS=Homo sapiens GN=UAP1L1 PE=1 SV=2	ISO-MSMS	1	JACB153_1	MDA-MB-231 R10K8	568.34	3	565.001	1691.98	NaN	NaN	0.31936	NaN	NaN	NaN	83.954	31.983	0.33386	83.954	83.794	84.128	0		0	0	0	0.033932	1	29351	40.801	21.061	1	NaN	NaN	0
AALLAELALLEPEALR	16	0	1	Unmodified	_AALLAELALLEPEALR_			0	0	Q3KQV9	Q3KQV9	Q3KQV9	UAP1L1	UDP-N-acetylhexosamine pyrophosphorylase-like protein 1	>sp|Q3KQV9|UAP1L_HUMAN UDP-N-acetylhexosamine pyrophosphorylase-like protein 1 OS=Homo sapiens GN=UAP1L1 PE=1 SV=2	ISO-MSMS	1	JACB153_1	MDA-MB-231 R10K8	852.5	2	846.998	1691.98	NaN	NaN	0.34645	NaN	NaN	NaN	83.958	31.983	0.34219	83.958	83.785	84.128	0		0	0	0	0.00018534	1	29362	80.534	73.164	1	NaN	NaN	0
AALLELWELR	10	0	1	Unmodified	_AALLELWELR_			0	0	Q13813-3;A6NG51;Q13813-2;Q13813	Q13813-3	Q13813-3	SPTAN1	Spectrin alpha chain, brain	>sp|Q13813-3|SPTN1_HUMAN Isoform 3 of Spectrin alpha chain, non-erythrocytic 1 OS=Homo sapiens GN=SPTAN1;>tr|A6NG51|A6NG51_HUMAN Spectrin alpha chain, non-erythrocytic 1 OS=Homo sapiens GN=SPTAN1 PE=1 SV=2;>sp|Q13813-2|SPTN1_HUMAN Isoform 2 of Spectrin alp	ISO-MSMS	1	JACB153_1	MDA-MB-231 R10K8	612.86	2	607.351	1212.69	NaN	NaN	0.66662	NaN	NaN	NaN	70.024	27.338	0.49361	70.024	69.753	70.247	0		0	0	0	0.00085318	1	24365	85.355	52.13	1	NaN	NaN	0
AALLETLSLLLAK	13	1	0	Unmodified	_AALLETLSLLLAK_			0	0	Q92616	Q92616	Q92616	GCN1L1	Translational activator GCN1	>sp|Q92616|GCN1L_HUMAN Translational activator GCN1 OS=Homo sapiens GN=GCN1L1 PE=1 SV=6	ISO-MSMS	1	JACB153_1	MDA-MB-231 R10K8	682.44	2	678.429	1354.84	NaN	NaN	0.49253	NaN	NaN	NaN	86.328	32.779	0.53656	86.328	86.045	86.581	7.6294e-06		0	0	0	0.00064126	1	30117	71.241	71.241	1	NaN	NaN	0
AALMESQGQQQEER	14	0	1	Unmodified	_AALMESQGQQQEER_			0	0	Q14980;Q14980-2;Q14980-3;Q14980-4	Q14980	Q14980	NUMA1	Nuclear mitotic apparatus protein 1	>sp|Q14980|NUMA1_HUMAN Nuclear mitotic apparatus protein 1 OS=Homo sapiens GN=NUMA1 PE=1 SV=2;>sp|Q14980-2|NUMA1_HUMAN Isoform 2 of Nuclear mitotic apparatus protein 1 OS=Homo sapiens GN=NUMA1;>sp|Q14980-3|NUMA1_HUMAN Isoform Numa-m of Nuclear mitotic appa	ISO-MSMS	1	JACB153_1	MDA-MB-231 R10K8	807.87	2	802.87	1603.73	NaN	NaN	-0.26661	NaN	NaN	NaN	20.134	10.715	0.22484	20.134	20.015	20.239	0		0	0	0	0.00039238	1	5344	76.262	63.125	1	NaN	NaN	0
AALPSHVVTMLDNFPTNLHPMSQLSAAVTALNSESNFAR	39	0	1	Unmodified	_AALPSHVVTMLDNFPTNLHPMSQLSAAVTALNSESNFAR_			0	0	O75390;B4DJV2;H0YH82;F8W1S4;F8VPA1;F8VRI6;F8VPF9;F8VX68;F8VRP1;F8VR34	O75390	O75390	CS	Citrate synthase, mitochondrial;Citrate synthase	>sp|O75390|CISY_HUMAN Citrate synthase, mitochondrial OS=Homo sapiens GN=CS PE=1 SV=2;>tr|B4DJV2|B4DJV2_HUMAN Citrate synthase OS=Homo sapiens GN=CS PE=1 SV=1;>tr|H0YH82|H0YH82_HUMAN Citrate synthase, mitochondrial (Fragment) OS=Homo sapiens GN=CS PE=1 SV=	ISO-MSMS	1	JACB153_1	MDA-MB-231 R10K8	1041.77	4	1038.77	4151.06	NaN	NaN	-0.39759	NaN	NaN	NaN	77.398	29.8	0.53091	77.398	77.136	77.667	0		0	0	0	6.3973e-08	1	27027	68.304	63.55	1	NaN	NaN	0
AALQEELQLCK	11	1	0	Unmodified	_AALQEELQLCK_			0	0	P49327	P49327	P49327	FASN	Fatty acid synthase;[Acyl-carrier-protein] S-acetyltransferase;[Acyl-carrier-protein] S-malonyltransferase;3-oxoacyl-[acyl-carrier-protein] synthase;3-oxoacyl-[acyl-carrier-protein] reductase;3-hydroxypalmitoyl-[acyl-carrier-protein] dehydratase;Enoyl-[acyl-carrier-protein] reductase;Oleoyl-[acyl-carrier-protein] hydrolase	>sp|P49327|FAS_HUMAN Fatty acid synthase OS=Homo sapiens GN=FASN PE=1 SV=3	ISO-MSMS	1	JACB153_1	MDA-MB-231 R10K8	655.85	2	651.84	1301.66	NaN	NaN	-3.9987	NaN	NaN	NaN	39.894	17.296	0.651	39.894	39.638	40.289	0		0	0	0	0.00012319	1	13154	116.77	76.051	1	NaN	NaN	0
AALSALESFLK	11	1	0	Unmodified	_AALSALESFLK_			0	0	P78527;P78527-2;E7EUY0	P78527	P78527	PRKDC	DNA-dependent protein kinase catalytic subunit	>sp|P78527|PRKDC_HUMAN DNA-dependent protein kinase catalytic subunit OS=Homo sapiens GN=PRKDC PE=1 SV=3;>sp|P78527-2|PRKDC_HUMAN Isoform 2 of DNA-dependent protein kinase catalytic subunit OS=Homo sapiens GN=PRKDC;>tr|E7EUY0|E7EUY0_HUMAN DNA-dependent pro	ISO-MSMS	1	JACB153_1	MDA-MB-231 R10K8	579.34	2	575.329	1148.64	NaN	NaN	-0.16381	NaN	NaN	NaN	64.586	25.528	0.50862	64.586	64.328	64.836	0		0	0	0	2.7913e-05	1	22432	135.66	94.379	1	NaN	NaN	0
AALSASEGEEVPQDK	15	1	0	Unmodified	_AALSASEGEEVPQDK_			0	0	O95831;O95831-3;O95831-4;O95831-6	O95831	O95831	AIFM1	Apoptosis-inducing factor 1, mitochondrial	>sp|O95831|AIFM1_HUMAN Apoptosis-inducing factor 1, mitochondrial OS=Homo sapiens GN=AIFM1 PE=1 SV=1;>sp|O95831-3|AIFM1_HUMAN Isoform 3 of Apoptosis-inducing factor 1, mitochondrial OS=Homo sapiens GN=AIFM1;>sp|O95831-4|AIFM1_HUMAN Isoform 4 of Apoptosis-i	ISO-MSMS	1	JACB153_1	MDA-MB-231 R10K8	769.88	2	765.868	1529.72	NaN	NaN	2.1131	NaN	NaN	NaN	25.019	12.345	0.27015	25.019	24.907	25.177	0		0	0	0	1.0172e-05	1	7230	114.64	95.247	1	NaN	NaN	0
AALSSQQQQQLALLLQQFQTLK	22	1	0	Unmodified	_AALSSQQQQQLALLLQQFQTLK_			0	0	I1E4Y6;Q6Y7W6-3;Q6Y7W6;Q6Y7W6-5;Q6Y7W6-4;E7ESB6;C9JHW1;E9PC50	I1E4Y6	I1E4Y6	GIGYF2	PERQ amino acid-rich with GYF domain-containing protein 2	>tr|I1E4Y6|I1E4Y6_HUMAN PERQ amino acid-rich with GYF domain-containing protein 2 OS=Homo sapiens GN=GIGYF2 PE=1 SV=1;>sp|Q6Y7W6-3|PERQ2_HUMAN Isoform 2 of PERQ amino acid-rich with GYF domain-containing protein 2 OS=Homo sapiens GN=GIGYF2;>sp|Q6Y7W6|PERQ2	ISO-MSMS	1	JACB153_1	MDA-MB-231 R10K8	832.14	3	829.131	2484.37	NaN	NaN	-0.67904	NaN	NaN	NaN	81.314	31.107	0.53894	81.314	81.014	81.553	-7.6294e-06		0	0	0	6.278e-05	1	28441	53.779	42.941	1	NaN	NaN	0
AALTAEHFAALQSLLK	16	1	0	Acetyl (Protein N-term)	_(ac)AALTAEHFAALQSLLK_			1	0	Q9P000;E9PJ95;Q9P000-2	Q9P000	Q9P000	COMMD9	COMM domain-containing protein 9	>sp|Q9P000|COMD9_HUMAN COMM domain-containing protein 9 OS=Homo sapiens GN=COMMD9 PE=1 SV=2;>tr|E9PJ95|E9PJ95_HUMAN COMM domain-containing protein 9 OS=Homo sapiens GN=COMMD9 PE=1 SV=1;>sp|Q9P000-2|COMD9_HUMAN Isoform 2 of COMM domain-containing protein 9	ISO-MSMS	1	JACB153_1	MDA-MB-231 R10K8	579	3	575.989	1724.95	NaN	NaN	1.2326	NaN	NaN	NaN	75.613	29.203	0.41943	75.613	75.387	75.807	0		0	0	0	0.0006215	1	26394	68.257	62.353	1	NaN	NaN	0
AALTTLFK	8	1	0	Acetyl (Protein N-term)	_(ac)AALTTLFK_			1	0	Q96KP4;Q96KP4-2;J3QKT2;J3KSV5;J3QL02;J3QRD0;J3QKQ0;J3QLU1;J3QR27;J3QQN6;J3QRA8;J3QRP4;J3KSS4	Q96KP4	Q96KP4	CNDP2	Cytosolic non-specific dipeptidase	>sp|Q96KP4|CNDP2_HUMAN Cytosolic non-specific dipeptidase OS=Homo sapiens GN=CNDP2 PE=1 SV=2;>sp|Q96KP4-2|CNDP2_HUMAN Isoform 2 of Cytosolic non-specific dipeptidase OS=Homo sapiens GN=CNDP2;>tr|J3QKT2|J3QKT2_HUMAN Cytosolic non-specific dipeptidase (Fragm	ISO-MSMS	1	JACB153_1	MDA-MB-231 R10K8	457.78	2	453.768	905.522	NaN	NaN	0.2029	NaN	NaN	NaN	75.877	29.294	0.43346	75.877	75.654	76.088	0		0	0	0	0.0041154	1	26458	98.392	73.469	1	NaN	NaN	0
AALVLEDGSVLR	12	0	1	Acetyl (Protein N-term)	_(ac)AALVLEDGSVLR_			1	0	P27708;F8VPD4	P27708	P27708	CAD	CAD protein;Glutamine-dependent carbamoyl-phosphate synthase;Aspartate carbamoyltransferase;Dihydroorotase	>sp|P27708|PYR1_HUMAN CAD protein OS=Homo sapiens GN=CAD PE=1 SV=3;>tr|F8VPD4|F8VPD4_HUMAN CAD protein OS=Homo sapiens GN=CAD PE=1 SV=1	ISO-MSMS	1	JACB153_1	MDA-MB-231 R10K8	647.87	2	642.862	1283.71	NaN	NaN	0.36119	NaN	NaN	NaN	76.459	29.489	0.44074	76.459	76.262	76.703	0		0	0	0	0.00010183	1	26662	100.55	40.064	1	NaN	NaN	0
AAMAAAQSGTPGPVFVELPVDVLYPYFMVQK	31	1	0	Unmodified	_AAMAAAQSGTPGPVFVELPVDVLYPYFMVQK_			0	0	A1L0T0;M0R026;E9PJS0;M0R1B5	A1L0T0	A1L0T0	ILVBL	Acetolactate synthase-like protein	>sp|A1L0T0|ILVBL_HUMAN Acetolactate synthase-like protein OS=Homo sapiens GN=ILVBL PE=1 SV=2;>tr|M0R026|M0R026_HUMAN Acetolactate synthase-like protein OS=Homo sapiens GN=ILVBL PE=1 SV=1;>tr|E9PJS0|E9PJS0_HUMAN Acetolactate synthase-like protein (Fragment)	ISO-MSMS	1	JACB153_1	MDA-MB-231 R10K8	1102.57	3	1099.56	3295.67	NaN	NaN	-0.45607	NaN	NaN	NaN	96.92	60.077	0.43761	96.92	96.712	97.149	-7.6294e-06		0	0	0	0.0063207	1	33658	35.216	33.198	1	NaN	NaN	0
AAMDNSEIAGEKK	13	2	0	Unmodified	_AAMDNSEIAGEKK_			0	0	Q16891;Q16891-4;Q16891-2;B9A067;Q16891-3;C9J406;H7C463	Q16891	Q16891	IMMT	Mitochondrial inner membrane protein	>sp|Q16891|IMMT_HUMAN Mitochondrial inner membrane protein OS=Homo sapiens GN=IMMT PE=1 SV=1;>sp|Q16891-4|IMMT_HUMAN Isoform 4 of Mitochondrial inner membrane protein OS=Homo sapiens GN=IMMT;>sp|Q16891-2|IMMT_HUMAN Isoform 2 of Mitochondrial inner membrane	ISO-MSMS	1	JACB153_1	MDA-MB-231 R10K8	460.57	3	455.222	1362.64	NaN	NaN	1.4931	NaN	NaN	NaN	15.267	9.0923	0.2209	15.267	15.176	15.397	0		0	0	0	0.098199	1	3564	40.725	26.467	1	NaN	NaN	0
[truncated: 12,993 more rows]
[truncated: 13 more columns]
